# Supplementary material for: Targeting dopamine receptor D2 as a novel therapeutic strategy in endometrial cancer
Source: J Exp Clin Cancer Res. 2021 Feb 8;40:61. doi: 10.1186/s13046-021-01842-9 (PMC7869513; doi:10.1186/s13046-021-01842-9)
Supplement: Supplementary file 1 — Additional file 1. [file 13046_2021_1842_MOESM1_ESM.xlsx]

## Sheet: AminoAcids heatmap 
	University of North Carolina at Chapel Hill UNCH-01-18MDCLP HD4 diet and mouse endometrial tumors
	Heat map of statistically significant biochemicals profiled in this study.										Fold of Change																				Statistical Values
											Two-Way ANOVA - Contrasts																Two-Way ANOVA - Main Effects				Two-Way ANOVA - Contrasts
												LFD						HFD					HFD LFD				Diet Effect	Treatment Effect	Diet: Treatment Interaction Effect		LFD												HFD
		Super Pathway	Sub Pathway	Biochemical Name							PD1 Control	LFD + ONC201 LFD + Veh	SPR589 Control	ONC201 PD1	SPR589 PD1	SPR589 ONC201	PD1 Control	HFD + ONC201 HFD + Veh	SPR589 Control	ONC201 PD1	SPR589 PD1	SPR589 ONC201	Control	PD1	ONC201	SPR589					PD1 Control		ONC201 Control		SPR589 Control		ONC201 PD1		SPR589 PD1		SPR589 ONC201		PD1 Control		ONC201 Control		SPR589 Control		ONC201 PD1
	Pathway Sort Order				Platform	Comp ID	KEGG	HMDB	PUBCHEM	X																				X	p-value	q-value	p-value	q-value	p-value	q-value	p-value	q-value	p-value	q-value	p-value	q-value	p-value	q-value	p-value	q-value	p-value	q-value	p-value
	1	Amino Acid	Glycine, Serine and Threonine Metabolism	glycine	LC/MS pos early	58	C00037	HMDB00123	750		1.12	0.73	0.85	0.65	0.76	1.17	1.66	2.04	1.37	1.23	0.83	0.67	0.86	1.27	2.41	1.39					0.3446	0.1598	0.3849	0.3397	0.9319	0.9027	0.074	0.0433	0.3035	0.1238	0.4327	0.7724	0.1752	0.5138	0.0993	0.4845	0.4577	0.7737	0.7601
	2			N-acetylglycine	LC/MS neg	27710		HMDB00532	10972		0.87	0.49	0.45	0.56	0.52	0.92	0.8	0.8	0.54	1	0.67	0.67	1.32	1.21	2.16	1.59					0.9088	0.3208	0.0195	0.1226	0.0106	0.4233	0.0147	0.0112	0.0079	0.0075	0.8065	0.8554	0.4566	0.6496	0.3908	0.6652	0.0238	0.2698	0.9083
	4			sarcosine	LC/MS pos early	1516	C00213	HMDB00271	1088		35.49	0.97	0.55	0.03	0.02	0.56	0.51	0.23	0.16	0.44	0.31	0.7	3.99	0.06	0.93	1.16					3.2162e-05	0.0003	0.8911	0.5008	0.3867	0.8649	4.955e-05	0.0001	1.9628e-06	3.6995e-05	0.3172	0.7603	0.4116	0.6315	0.1878	0.5607	0.0975	0.4685	0.6126
	5			dimethylglycine	LC/MS pos early	5086	C01026	HMDB00092	673		4.35	0.52	0.83	0.12	0.19	1.61	0.57	0.37	0.26	0.66	0.45	0.69	3.01	0.39	2.17	0.93					0.0014	0.0029	0.1596	0.2439	0.7988	0.8927	1.7649e-05	8.7362e-05	0.0007	0.0011	0.2463	0.7603	0.1089	0.4657	0.0559	0.3894	0.005	0.1037	0.7438
	6			betaine	LC/MS pos early	3141	C00719	HMDB00043	247		6.24	1.12	1.23	0.18	0.2	1.1	1.88	0.99	1.29	0.52	0.68	1.3	1.16	0.35	1.03	1.22					5.9707e-06	0.0001	0.4776	0.3726	0.4746	0.8649	5.7854e-05	0.0001	5.8738e-05	0.0002	0.9961	0.8797	0.0914	0.449	0.8273	0.7593	0.4847	0.7737	0.0583
	7			betaine aldehyde	LC/MS pos early	15499	C00576	HMDB01252	249		2.22	1.4	1.12	0.63	0.5	0.8	3.53	1.32	3.35	0.37	0.95	2.54	0.74	1.18	0.7	2.24					0.047	0.0354	0.2371	0.2756	0.677	0.8871	0.4009	0.1713	0.111	0.0567	0.4395	0.7742	0.0534	0.347	0.4381	0.6652	0.061	0.4194	0.0084
	9			serine	LC/MS pos early	1648	C00065	HMDB00187	5951		1.02	0.6	0.74	0.59	0.72	1.23	1.25	1.2	0.97	0.96	0.77	0.81	1.03	1.26	2.05	1.35					0.6745	0.2616	0.0898	0.1938	0.3259	0.8454	0.0367	0.0243	0.164	0.0784	0.4612	0.7809	0.4018	0.6315	0.5571	0.6897	0.7906	0.8134	0.7999
	10			N-acetylserine	LC/MS pos early	37076		HMDB02931	65249		0.85	0.59	0.75	0.69	0.88	1.27	0.89	1.14	0.79	1.29	0.89	0.69	1.23	1.27	2.36	1.29					0.6156	0.2427	0.0504	0.1605	0.2627	0.8454	0.1386	0.0731	0.5323	0.1901	0.3834	0.7603	0.4907	0.6496	0.6404	0.7037	0.3604	0.7458	0.2504
	16			threonine	LC/MS pos early	1284	C00188	HMDB00167	6288		1.01	0.67	0.69	0.66	0.68	1.03	1.44	1.36	1.12	0.94	0.78	0.83	0.89	1.27	1.81	1.45					0.5819	0.2333	0.2087	0.2671	0.3044	0.8454	0.0743	0.0433	0.1185	0.06	0.8136	0.8554	0.2461	0.5472	0.3832	0.6652	0.9083	0.8244	0.7692
	17			N-acetylthreonine	LC/MS neg	33939		HMDB62557	152204		1.17	0.64	0.75	0.55	0.64	1.17	1.47	0.84	0.75	0.57	0.51	0.9	1.32	1.65	1.72	1.32					0.2971	0.1448	0.1689	0.246	0.378	0.8649	0.0184	0.0135	0.0585	0.0341	0.6132	0.8445	0.4855	0.6496	0.5424	0.6843	0.2739	0.7019	0.1948
	28		Alanine, Glutamate & Aspartate Metabolism	alanine	LC/MS pos early	1126	C00041	HMDB00161	5950		1.71	0.77	0.83	0.45	0.49	1.08	1.32	1.12	0.88	0.85	0.67	0.78	1.11	0.86	1.62	1.18					0.0119	0.0125	0.275	0.2907	0.3496	0.8459	0.0006	0.0008	0.0009	0.0014	0.8733	0.8554	0.2424	0.5472	0.684	0.7066	0.4316	0.7551	0.442
	30			N-acetylalanine	LC/MS neg	1585	C02847	HMDB00766	88064		0.79	0.29	0.36	0.37	0.45	1.23	0.67	0.49	0.54	0.72	0.8	1.11	1.41	1.2	2.36	2.12					0.9021	0.319	0.0105	0.0984	0.0494	0.5877	0.0076	0.0068	0.0376	0.0244	0.5137	0.8193	0.6697	0.6741	0.2878	0.6103	0.335	0.745	0.521
	34			aspartate	LC/MS pos early	443	C00049	HMDB00191	5960		0.89	0.74	1.03	0.83	1.16	1.4	1.29	1.43	1.18	1.1	0.91	0.83	1.02	1.49	1.99	1.18					0.9704	0.3339	0.4728	0.3726	0.9469	0.9027	0.4504	0.1867	0.9174	0.2861	0.5144	0.8193	0.308	0.5941	0.1955	0.563	0.5001	0.7737	0.778
	35			N-acetylaspartate (NAA)	LC/MS neg	22185	C01042	HMDB00812	65065		0.49	0.71	3.24	1.45	6.63	4.57	0.2	0.24	0.17	1.22	0.87	0.71	5.17	2.08	1.75	0.27					0.0174	0.0169	0.4454	0.362	0.8687	0.9027	0.0948	0.0526	0.0258	0.0187	0.549	0.8345	0.6477	0.6738	0.8373	0.7598	0.5325	0.7749	0.8009
	38			asparagine	LC/MS pos early	512	C00152	HMDB00168	6267		0.77	0.56	0.74	0.73	0.96	1.32	1.31	1.39	0.98	1.06	0.75	0.7	1.06	1.81	2.65	1.41					0.4065	0.1794	0.0821	0.1895	0.3569	0.8497	0.3504	0.1545	0.9263	0.2878	0.3995	0.7603	0.3635	0.6315	0.3381	0.645	0.9123	0.8244	0.9601
	39			N-acetylasparagine	LC/MS pos early	33942		HMDB06028	99715		4.74	0.44	1.69	0.09	0.36	3.82	3.46	0.55	0.66	0.16	0.19	1.2	1.43	1.05	1.76	0.55					0.0175	0.0169	0.115	0.2165	0.7287	0.8871	0.0002	0.0003	0.0394	0.0252	0.0569	0.7068	0.8872	0.7291	0.3097	0.6268	0.4636	0.7737	0.3809
	41			glutamate	LC/MS pos early	57	C00025	HMDB00148	611		1.1	0.84	0.86	0.77	0.78	1.02	1.53	1.48	1.36	0.97	0.89	0.92	0.93	1.29	1.63	1.47					0.3886	0.1751	0.7172	0.4529	0.7202	0.8871	0.2235	0.1089	0.225	0.0971	0.9967	0.8797	0.1039	0.4657	0.1282	0.5032	0.2846	0.7184	0.9125
	42			glutamine	LC/MS pos early	53	C00064	HMDB00641	5961		1.4	0.57	0.95	0.41	0.68	1.65	0.94	0.75	0.88	0.79	0.93	1.18	1.07	0.72	1.39	0.99					0.1075	0.0689	0.0116	0.103	0.9478	0.9027	0.0001	0.0002	0.0946	0.0508	0.0137	0.527	0.6047	0.6636	0.1149	0.5032	0.6495	0.798	0.2823
	43			alpha-ketoglutaramate*	LC/MS polar	62101					1.33	0.56	2.57	0.42	1.94	4.62	0.85	0.4	0.99	0.47	1.16	2.47	1.88	1.2	1.34	0.72					0.4179	0.1832	0.0794	0.1879	0.0726	0.6351	0.0124	0.0096	0.3114	0.1261	0.0008	0.126	0.7975	0.7084	0.0368	0.3636	0.8533	0.8189	0.0645
	44			N-acetylglutamate	LC/MS pos early	15720	C00624	HMDB01138	70914		6.82	0.93	0.93	0.14	0.14	1	1.67	0.52	0.43	0.31	0.25	0.82	1.27	0.31	0.7	0.58					0.0003	0.001	0.8164	0.4705	0.7874	0.8883	0.0002	0.0003	0.0001	0.0003	0.9701	0.8768	0.4883	0.6496	0.3129	0.628	0.1416	0.5888	0.0929
	45			N-acetylglutamine	LC/MS polar	33943	C02716	HMDB06029	182230		16.05	0.58	1.67	0.04	0.1	2.87	6.16	0.27	0.47	0.04	0.08	1.73	2.89	1.11	1.35	0.81					0.0004	0.0013	0.4431	0.3619	0.7849	0.8883	4.0584e-05	0.0001	0.001	0.0015	0.3003	0.7603	0.3448	0.6297	0.0496	0.3894	0.3161	0.7346	0.0049
	47			4-hydroxyglutamate	LC/MS pos early	40499	C03079	HMDB01344	439902		2	0.5	0.65	0.25	0.32	1.29	2.23	0.73	0.38	0.33	0.17	0.52	1.28	1.43	1.86	0.75					0.1707	0.0958	0.287	0.2926	0.3636	0.8519	0.0177	0.0132	0.0259	0.0187	0.8737	0.8554	0.7077	0.6877	0.3883	0.6652	0.0642	0.4283	0.2186
	49			gamma-carboxyglutamate	LC/MS pos early	38754		HMDB41900	40772		1.11	0.46	0.43	0.41	0.39	0.95	1.07	1.14	1.08	1.06	1.01	0.95	0.76	0.74	1.91	1.91					0.2895	0.1421	0.0678	0.1742	0.1169	0.6884	0.0053	0.0049	0.0107	0.0097	0.7849	0.8554	0.8685	0.7231	0.7137	0.7212	0.857	0.8189	0.5949
	50			glutamate, gamma-methyl ester	LC/MS pos early	33487		HMDB61715	68662		1.67	0.81	0.84	0.48	0.5	1.04	1.72	1.33	1.16	0.77	0.68	0.88	1.03	1.06	1.69	1.43					0.0398	0.0316	0.6267	0.4269	0.4637	0.8649	0.0125	0.0096	0.0066	0.0067	0.8042	0.8554	0.1064	0.4657	0.4269	0.6652	0.7932	0.8134	0.4009
	51			pyroglutamine*	LC/MS pos early	46225			134508		6.12	0.75	1.28	0.12	0.21	1.71	4.53	1.52	0.73	0.34	0.16	0.48	0.57	0.42	1.15	0.33					0.0042	0.006	0.5394	0.391	0.4823	0.8649	0.0007	0.001	0.0252	0.0184	0.1917	0.7603	0.0718	0.4046	0.6439	0.7037	0.5686	0.7773	0.1742
	52			N-acetyl-aspartyl-glutamate (NAAG)	LC/MS pos early	35665	C12270	HMDB01067	5255		0.09	0.71	0.28	8.03	3.22	0.4	0.08	0.1	0.06	1.18	0.77	0.65	1.62	1.55	0.23	0.37					0.0059	0.0078	0.1313	0.2293	0.1255	0.6884	0.1796	0.0912	0.1872	0.0856	0.9809	0.8797	0.0145	0.2294	0.0726	0.4299	0.0173	0.2223	0.481
	53			beta-citrylglutamate	LC/MS neg	54923	C20775		72715786		0.22	0.25	0.4	1.18	1.87	1.58	1.13	1.29	0.68	1.14	0.6	0.53	0.55	2.89	2.79	0.93					0.0026	0.0044	0.1469	0.2419	0.3231	0.8454	0.0912	0.0512	0.0329	0.0221	0.6346	0.8461	0.71	0.6877	0.7188	0.7212	0.673	0.798	0.4654
	59			S-1-pyrroline-5-carboxylate	LC/MS pos early	42370	C04322	HMDB01301	1196		2.59	0.76	0.65	0.3	0.25	0.86	1.7	0.39	0.91	0.23	0.53	2.32	1.17	0.77	0.6	1.63					0.0115	0.0124	0.4579	0.3676	0.3226	0.8454	0.0015	0.0017	0.0007	0.0012	0.8023	0.8554	0.2542	0.5534	0.0468	0.3894	0.9049	0.8244	0.0026
	65		Histidine Metabolism	histidine	LC/MS neg	59	C00135	HMDB00177	6274		1.86	0.68	0.82	0.36	0.44	1.22	1.43	1.11	1.05	0.77	0.74	0.95	0.99	0.76	1.62	1.27					0.0072	0.009	0.1319	0.2293	0.4757	0.8649	8.5335e-05	0.0002	0.001	0.0015	0.4181	0.7603	0.2008	0.5369	0.8591	0.7598	0.9776	0.8427	0.2686
	66			1-methylhistidine	LC/MS pos early	30460	C01152	HMDB00001	92105		0.56	0.56	0.74	1.01	1.33	1.31	1.58	1.66	1.6	1.05	1.01	0.96	1.13	3.23	3.35	2.45					0.5726	0.2305	0.3344	0.3149	0.7592	0.8871	0.6853	0.2467	0.7959	0.2562	0.5076	0.8178	0.6632	0.6741	0.1767	0.5607	0.3191	0.738	0.3546
	67			3-methylhistidine	LC/MS neg	15677	C01152	HMDB00479	64969		0.27	0.43	0.63	1.61	2.35	1.46	1.7	0.91	1.34	0.54	0.79	1.47	0.75	4.81	1.6	1.61					0.0307	0.0257	0.273	0.2903	0.7979	0.8927	0.2656	0.125	0.0543	0.032	0.3984	0.7603	0.6444	0.6738	0.9841	0.7897	0.6951	0.798	0.6302
	68			N-acetylhistidine	LC/MS pos early	33946	C02997	HMDB32055	75619		16.34	0.37	1.09	0.02	0.07	2.95	3.93	0.29	0.36	0.07	0.09	1.27	2.4	0.58	1.86	0.8					0.0006	0.0015	0.1229	0.2227	0.9189	0.9027	4.3237e-06	4.6029e-05	0.0008	0.0013	0.1011	0.7342	0.4784	0.6496	0.1091	0.4997	0.1753	0.6415	0.0236
	69			N-acetyl-3-methylhistidine*	LC/MS pos early	43256			193270		5.91	0.22	1.56	0.04	0.26	6.96	10.91	0.38	0.76	0.04	0.07	1.99	1.25	2.31	2.13	0.61					0.0294	0.0249	0.0656	0.1717	0.5676	0.8871	0.0002	0.0003	0.1003	0.0527	0.0179	0.5933	0.2896	0.5771	0.1448	0.5271	0.6794	0.798	0.0143
	70			N-acetyl-1-methylhistidine*	LC/MS pos early	43255			193270		3.42	0.28	1.06	0.08	0.31	3.83	4	0.73	0.63	0.18	0.16	0.87	1.84	2.15	4.83	1.1					0.0092	0.0108	0.0847	0.1925	0.425	0.8649	5.6252e-05	0.0001	0.0605	0.0347	0.0139	0.527	0.5768	0.6632	0.3562	0.6539	0.3276	0.745	0.1425
	72			trans-urocanate	LC/MS pos early	607	C00785	HMDB00301	736715		0.68	0.52	0.88	0.77	1.29	1.68	1.8	1.28	1.67	0.71	0.93	1.3	0.51	1.35	1.25	0.97					0.0456	0.0345	0.934	0.5133	0.6961	0.8871	0.0546	0.0337	0.0184	0.0149	0.6362	0.8461	0.8979	0.7311	0.95	0.7841	0.5469	0.7773	0.9477
	73			cis-urocanate	LC/MS neg	40410		HMDB34174	1549103		0.66	0.56	0.5	0.85	0.77	0.9	1.63	1.03	1.35	0.63	0.83	1.31	0.61	1.52	1.13	1.65					0.0079	0.0096	0.321	0.3133	0.054	0.5877	0.0807	0.0465	0.4215	0.1582	0.333	0.7603	0.4936	0.6496	0.9752	0.7876	0.5718	0.7773	0.4744
	74			imidazole propionate	LC/MS pos early	40730		HMDB02271	70630		7.72	0.75	1.39	0.1	0.18	1.84	2.29	1.74	1.7	0.76	0.74	0.97	1.26	0.37	2.93	1.55					0.0028	0.0046	0.1685	0.246	0.7235	0.8871	4.4441e-05	0.0001	0.0074	0.0072	0.0863	0.7205	0.2735	0.572	0.5932	0.6982	0.4255	0.7522	0.5708
	75			formiminoglutamate	LC/MS pos early	43493	C00439	HMDB00854	439233		0.57	0.06	0.08	0.11	0.14	1.26	0.3	0.07	0.03	0.24	0.11	0.47	2.06	1.08	2.33	0.86					0.6282	0.2462	2.5823e-05	0.0038	0.0001	0.0301	0.0001	0.0002	0.0005	0.0009	0.649	0.8461	0.1171	0.4757	0.0004	0.0987	4.4335e-06	0.0011	0.0317
	76			imidazole lactate	LC/MS pos early	15716	C05568	HMDB02320	440129		3.38	0.53	0.74	0.16	0.22	1.41	1.53	1.51	0.38	0.99	0.25	0.25	1.79	0.81	5.15	0.92					0.0148	0.0151	0.3253	0.3133	0.6511	0.8871	0.001	0.0013	0.0046	0.0049	0.592	0.8385	0.7676	0.6975	0.9314	0.7757	0.07	0.4418	0.834
	77			carnosine	LC/MS neg	1768	C00386	HMDB00033	439224		0.29	0.75	0.51	2.64	1.8	0.68	0.15	0.18	0.18	1.24	1.27	1.02	1.29	0.66	0.31	0.46					0.1135	0.0717	0.5562	0.3982	0.77	0.8871	0.3117	0.1416	0.1931	0.0876	0.7664	0.8554	0.1232	0.4772	0.2411	0.5853	0.3079	0.7314	0.7025
	80			anserine	LC/MS pos early	15747	C01262	HMDB00194	112072		0.09	1.36	0.57	14.58	6.07	0.42	0.05	0.04	0.02	0.87	0.51	0.58	2.84	1.39	0.08	0.12					0.1045	0.0678	0.2021	0.2609	0.674	0.8871	0.7175	0.2552	0.2231	0.0965	0.3878	0.7603	0.0864	0.4413	0.0804	0.4403	0.015	0.2222	0.9712
	81			histamine	LC/MS pos early	1574	C00388	HMDB00870	774		0.29	0.88	0.61	3.09	2.13	0.69	1.49	1.16	0.48	0.78	0.33	0.42	0.56	2.94	0.74	0.45					0.0056	0.0075	0.954	0.5184	0.2967	0.8454	0.0065	0.0059	0.0687	0.0387	0.3237	0.7603	0.3845	0.6315	0.8804	0.7665	0.3812	0.7458	0.3088
	82			1-methylhistamine	LC/MS pos early	43831	C05127	HMDB00898	3614		0.46	0.74	0.48	1.61	1.03	0.64	1.17	0.77	0.76	0.66	0.65	0.99	0.95	2.41	0.99	1.52					0.0029	0.0046	0.5819	0.4077	0.153	0.7532	0.0124	0.0096	0.0937	0.0505	0.3727	0.7603	0.8203	0.7093	0.4934	0.6828	0.5611	0.7773	0.6461
	83			1-methyl-4-imidazoleacetate	LC/MS pos early	32350	C05828	HMDB02820	75810		3.2	0.44	0.79	0.14	0.25	1.82	1.81	0.34	0.45	0.19	0.25	1.32	1.18	0.67	0.92	0.67					0.0043	0.006	0.0335	0.1516	0.6208	0.8871	5.6502e-06	4.662e-05	0.0011	0.0015	0.0963	0.7325	0.2882	0.5771	0.0071	0.2138	0.087	0.4637	0.0003
	84			1-ribosyl-imidazoleacetate*	LC/MS pos early	61868	C05131	HMDB02331	5117448		2.79	0.44	0.57	0.16	0.21	1.32	1.1	0.48	0.32	0.44	0.29	0.67	0.94	0.37	1.03	0.52					0.0025	0.0043	0.3252	0.3133	0.7132	0.8871	0.0001	0.0003	0.0009	0.0014	0.5349	0.8238	0.5955	0.6636	0.0607	0.3962	0.0048	0.1037	0.1706
	85			4-imidazoleacetate	LC/MS pos early	32349	C02835	HMDB02024	96215		0.44	0.48	0.56	1.1	1.28	1.16	1.48	0.94	0.82	0.63	0.56	0.88	0.28	0.95	0.55	0.41					0.0424	0.0331	0.037	0.1548	0.0916	0.6574	0.9515	0.3099	0.7145	0.2331	0.6698	0.8461	0.2703	0.5703	0.6368	0.7037	0.3078	0.7314	0.1189
	92		Lysine Metabolism	lysine	LC/MS pos early	1301	C00047	HMDB00182	5962		1.72	0.54	0.84	0.32	0.49	1.55	0.99	0.81	0.65	0.81	0.66	0.81	1.23	0.71	1.82	0.95					0.0174	0.0169	0.0172	0.1173	0.5928	0.8871	1.318e-05	7.9218e-05	0.0044	0.0048	0.0586	0.7068	0.996	0.7488	0.3826	0.6652	0.0959	0.4685	0.3853
	93			N2-acetyllysine	LC/MS polar	36751	C12989	HMDB00446	92907		1.42	1	1	0.7	0.7	1	3.22	1	1	0.31	0.31	1	1	2.26	1	1					0.2729	0.1365	1	0.526	1	0.9214	0.2729	0.1278	0.2729	0.1132	1	0.8797	0.0164	0.2378	1	0.7904	1	0.8436	0.0164
	94			N6-acetyllysine	LC/MS neg	36752	C02727	HMDB00206	92832		2.17	0.51	0.6	0.24	0.28	1.18	1.2	0.76	0.57	0.63	0.47	0.75	1.26	0.7	1.88	1.19					0.0061	0.008	0.0761	0.183	0.2026	0.8337	2.9311e-05	0.0001	0.0001	0.0004	0.6023	0.8385	0.5775	0.6632	0.2291	0.5781	0.0601	0.419	0.0822
	101			N6,N6,N6-trimethyllysine	LC/MS pos early	1498	C03793	HMDB01325	440120		1.89	0.53	0.69	0.28	0.37	1.32	1.02	0.88	0.54	0.86	0.53	0.61	1.34	0.72	2.24	1.04					0.0358	0.0294	0.0584	0.1714	0.3927	0.8649	0.0002	0.0003	0.0042	0.0047	0.2846	0.7603	0.8864	0.7291	0.5713	0.6915	0.0708	0.4418	0.6717
	102			5-hydroxylysine	LC/MS pos early	15685	C16741	HMDB00450	1029		0.44	0.35	0.82	0.8	1.87	2.34	0.75	1.25	1.04	1.68	1.4	0.83	0.61	1.05	2.2	0.78					0.0045	0.0062	0.2184	0.2679	0.8179	0.8989	0.0857	0.0491	0.0082	0.0077	0.3144	0.7603	0.6702	0.6741	0.6257	0.7037	0.832	0.8184	0.3628
	103			5-(galactosylhydroxy)-L-lysine	LC/MS pos early	43582					0.56	0.64	0.72	1.15	1.29	1.12	0.91	1.72	1.13	1.9	1.25	0.66	0.73	1.19	1.96	1.15					0.1039	0.0677	0.4355	0.3619	0.7578	0.8871	0.3862	0.1662	0.1835	0.0845	0.6358	0.8461	0.7237	0.6877	0.278	0.6103	0.7561	0.8056	0.1532
	104			saccharopine	LC/MS pos early	1495	C00449	HMDB00279	160556		13.06	0.39	0.39	0.03	0.03	1	6.65	0.53	0.53	0.08	0.08	1	0.74	0.37	1	1					0.0009	0.0021	0.5228	0.3864	0.5228	0.8733	0.0001	0.0003	0.0001	0.0003	1	0.8797	0.1768	0.5138	0.6142	0.7037	0.6142	0.7892	0.067
	105			2-aminoadipate	LC/MS pos early	6146	C00956	HMDB00510	469		1.83	0.11	0.19	0.06	0.11	1.82	1.02	0.31	0.29	0.3	0.28	0.93	0.76	0.43	2.2	1.12					0.1055	0.0682	0.0816	0.1895	0.1683	0.7852	0.0014	0.0016	0.0039	0.0045	0.7034	0.8461	0.7221	0.6877	0.3958	0.6652	0.2053	0.6623	0.2309
	109			glutarylcarnitine (C5-DC)	LC/MS pos early	44664		HMDB13130	71464488		42.6	0.15	0.29	0	0.01	1.87	28.26	0.42	0.41	0.01	0.01	0.96	0.8	0.53	2.2	1.13					7.2314e-06	0.0001	0.0523	0.1628	0.3353	0.8454	1.1444e-08	1.0318e-06	3.1077e-07	1.7572e-05	0.3116	0.7603	0.1328	0.4877	0.2658	0.5994	0.2307	0.6752	0.0111
	113			pipecolate	LC/MS pos early	1444	C00408	HMDB00070	849		1.32	1.7	0.96	1.29	0.73	0.57	2.04	2.23	1.22	1.09	0.6	0.54	1.2	1.85	1.58	1.51					0.2018	0.1081	0.3979	0.3481	0.9533	0.9027	0.6599	0.2404	0.1825	0.0845	0.3665	0.7603	0.214	0.5472	0.0445	0.3894	0.6579	0.798	0.4215
	117			5-aminovalerate	LC/MS pos early	18319	C00431	HMDB03355	138		1.76	1.2	0.78	0.68	0.45	0.65	2.29	0.47	0.83	0.2	0.36	1.77	1.02	1.33	0.4	1.08					0.0542	0.0403	0.7561	0.458	0.443	0.8649	0.1025	0.0565	0.0087	0.0081	0.2833	0.7603	0.0152	0.2294	0.0531	0.3894	0.5626	0.7773	5.2348e-05
	119			N,N,N-trimethyl-5-aminovalerate	LC/MS pos early	57687					0.94	0.92	0.98	0.98	1.03	1.06	1.41	1.38	0.98	0.98	0.7	0.71	0.54	0.8	0.8	0.54					0.7966	0.2925	0.9722	0.5216	0.8416	0.8989	0.8236	0.282	0.9538	0.2925	0.8689	0.8554	0.3011	0.5874	0.4163	0.6652	0.9409	0.8336	0.8221
	120		Phenylalanine & Tyrosine Metabolism	phenylalanine	LC/MS pos early	64	C00079	HMDB00159	6140		1.3	0.65	0.68	0.5	0.52	1.04	1.09	1.01	0.83	0.93	0.76	0.82	1.12	0.94	1.75	1.37					0.1035	0.0676	0.1204	0.2212	0.2142	0.8337	0.0023	0.0024	0.0056	0.0059	0.7471	0.8554	0.757	0.6975	0.973	0.7873	0.3441	0.745	0.7314
	121			N-acetylphenylalanine	LC/MS neg	33950	C03519	HMDB00512	74839		1.88	0.54	1.45	0.29	0.77	2.68	1.78	0.26	0.51	0.15	0.29	1.94	2.34	2.22	1.14	0.82					0.1705	0.0958	0.1977	0.2609	0.5934	0.8871	0.01	0.0083	0.3963	0.1511	0.072	0.7068	0.5351	0.659	0.0215	0.2939	0.2498	0.7007	0.0848
	122			1-carboxyethylphenylalanine	LC/MS neg	62566					1.9	0.5	0.32	0.26	0.17	0.64	1.51	1.15	0.79	0.77	0.52	0.68	1.09	0.86	2.49	2.67					0.0293	0.0249	0.1473	0.2419	0.0219	0.4915	0.0006	0.0008	3.6355e-05	0.0001	0.3694	0.7603	0.2596	0.5615	0.6626	0.7054	0.352	0.745	0.4854
	125			phenylpyruvate	LC/MS polar	566	C00166	HMDB00205	997		2.26	0.58	0.63	0.26	0.28	1.09	1.25	0.7	0.68	0.56	0.54	0.97	1.07	0.59	1.3	1.16					0.0079	0.0096	0.2136	0.2673	0.0736	0.6351	0.0002	0.0004	3.781e-05	0.0001	0.5695	0.8385	0.6691	0.6741	0.2632	0.5994	0.2664	0.7007	0.1254
	126			phenyllactate (PLA)	LC/MS neg	22130	C05607	HMDB00779	3848		1.46	0.47	0.75	0.32	0.51	1.61	0.43	0.62	0.32	1.45	0.75	0.52	2.11	0.62	2.82	0.91					0.2022	0.1081	0.0078	0.0903	0.3005	0.8454	0.0002	0.0003	0.024	0.0178	0.0874	0.7205	0.0072	0.1823	0.0341	0.3493	7.7697e-05	0.0123	0.5261
	137			tyrosine	LC/MS pos early	1299	C00082	HMDB00158	6057		1.78	0.89	0.98	0.5	0.55	1.09	1.01	0.79	0.64	0.79	0.63	0.8	1.94	1.09	1.72	1.26					0.0086	0.0103	0.968	0.5203	0.7058	0.8871	0.0095	0.008	0.022	0.0167	0.7357	0.851	0.9813	0.7488	0.4247	0.6652	0.0886	0.4637	0.4383
	138			N-acetyltyrosine	LC/MS neg	32390		HMDB00866	68310		1.06	0.7	1.46	0.66	1.37	2.08	2.26	0.17	0.24	0.08	0.11	1.39	4.84	10.3	1.19	0.79					0.9448	0.3281	0.4174	0.3546	0.9952	0.9187	0.3793	0.1644	0.9401	0.2894	0.4208	0.7603	0.2402	0.5472	0.0131	0.2763	0.0263	0.2771	0.1678
	139			1-carboxyethyltyrosine	LC/MS neg	62564					1.69	0.54	0.31	0.32	0.18	0.58	1.05	0.75	0.45	0.71	0.43	0.6	1.79	1.12	2.52	2.59					0.097	0.0649	0.1651	0.244	0.0138	0.4758	0.0034	0.0033	0.0001	0.0003	0.252	0.7603	0.7323	0.6905	0.6643	0.7054	0.0393	0.3391	0.439
	147			4-hydroxyphenylpyruvate	LC/MS neg	1669	C01179	HMDB00707	979		2.62	0.66	0.73	0.25	0.28	1.11	0.55	0.41	0.37	0.75	0.67	0.89	1.5	0.32	0.94	0.75					0.0036	0.0054	0.1252	0.2243	0.0563	0.5877	3.4832e-05	0.0001	9.8065e-06	8.9735e-05	0.6914	0.8461	0.0551	0.353	0.0066	0.2138	0.0013	0.0463	0.3772
	150			3-(4-hydroxyphenyl)lactate	LC/MS neg	32197	C03672	HMDB00755	9378		3.48	0.53	0.51	0.15	0.15	0.97	0.34	0.29	0.17	0.86	0.51	0.6	3.65	0.36	2.02	1.25					0.0098	0.0113	0.0973	0.2011	0.1218	0.6884	7.5641e-05	0.0002	0.0001	0.0003	0.9072	0.8643	0.0195	0.2502	0.0099	0.2586	0.0003	0.0203	0.7843
	154			phenol sulfate	LC/MS neg	32553	C02180	HMDB60015	74426		0.87	1.32	1.11	1.51	1.28	0.85	1.93	1.72	1.33	0.89	0.69	0.77	0.58	1.28	0.76	0.69					0.5554	0.225	0.4367	0.3619	0.9746	0.9106	0.1751	0.0895	0.5768	0.2013	0.4183	0.7603	0.0236	0.2502	0.1016	0.4851	0.2476	0.7007	0.5021
	155			phenol glucuronide	LC/MS neg	52747		HMDB60014	87235		1.12	3.48	0.95	3.1	0.85	0.27	7.46	3.15	1.4	0.42	0.19	0.44	0.35	2.35	0.32	0.52					0.9654	0.3332	0.0838	0.1921	0.9112	0.9027	0.0914	0.0512	0.8768	0.2765	0.0667	0.7068	0.015	0.2294	0.1842	0.5607	0.6846	0.798	0.2412
	168			3-methoxytyrosine	LC/MS pos early	12017		HMDB01434	1670		0.83	1.48	1.4	1.79	1.68	0.94	1.43	0.99	1.24	0.69	0.86	1.24	1.79	3.09	1.2	1.58					0.8458	0.3053	0.3133	0.3106	0.4542	0.8649	0.2307	0.1109	0.3471	0.1369	0.792	0.8554	0.3831	0.6315	0.6037	0.7037	0.5967	0.783	0.7217
	189			p-cresol glucuronide*	LC/MS neg	48841		HMDB11686	154035		0.59	0.43	0.43	0.73	0.73	1	0.65	0.58	0.36	0.89	0.55	0.62	1.05	1.17	1.41	0.88					0.1758	0.0984	0.06	0.1714	0.0877	0.6574	0.5802	0.2193	0.7119	0.2331	0.8536	0.8554	0.0431	0.3362	0.1785	0.5607	0.0335	0.3279	0.4756
	191			N-formylphenylalanine	LC/MS neg	48433			759256		0.57	0.3	0.5	0.53	0.89	1.66	0.52	0.62	0.35	1.19	0.66	0.55	1.78	1.65	3.66	1.22					0.1222	0.0747	0.0103	0.0984	0.0592	0.5895	0.2719	0.1277	0.7184	0.2339	0.4572	0.7775	0.1809	0.5138	0.3659	0.659	0.043	0.3578	0.6571
	210		Tryptophan Metabolism	tryptophan	LC/MS pos early	54	C00078	HMDB00929	6305		1.16	0.72	0.78	0.62	0.68	1.08	1.36	1.14	0.95	0.84	0.7	0.83	1	1.18	1.58	1.22					0.3435	0.1597	0.1038	0.2077	0.272	0.8454	0.0123	0.0096	0.0447	0.0276	0.5849	0.8385	0.2111	0.5472	0.5999	0.7031	0.674	0.798	0.4623
	211			N-acetyltryptophan	LC/MS neg	33959	C03137	HMDB13713	700653		0.46	0.78	1.29	1.68	2.79	1.66	2.2	0.63	0.83	0.29	0.38	1.33	0.98	4.67	0.79	0.63					0.1796	0.1	0.4991	0.3802	0.9922	0.9187	0.4982	0.1996	0.1827	0.0845	0.5053	0.8178	0.8277	0.7106	0.2171	0.5696	0.5853	0.7812	0.3069
	217			C-glycosyltryptophan	LC/MS pos early	48782			10981970		0.68	0.57	0.72	0.84	1.05	1.26	1.06	1.34	1.49	1.26	1.4	1.11	0.97	1.51	2.27	2.01					0.1152	0.0721	0.2411	0.2756	0.6355	0.8871	0.6765	0.2445	0.2641	0.1101	0.4804	0.8018	0.9611	0.7458	0.5291	0.6828	0.3028	0.7314	0.4979
	221			kynurenine	LC/MS pos early	15140	C00328	HMDB00684	161166		1.38	0.15	0.15	0.11	0.11	1.05	0.93	0.41	0.42	0.44	0.45	1.03	0.48	0.32	1.34	1.3					0.0735	0.0523	0.0033	0.0734	0.0026	0.2321	1.3112e-05	7.9218e-05	1.0179e-05	8.9735e-05	0.9371	0.8683	0.7877	0.705	0.0935	0.4774	0.0737	0.4482	0.1557
	223			N-acetylkynurenine (2)	LC/MS pos early	48757					0.26	0.21	0.95	0.8	3.67	4.56	1.99	0.15	0.45	0.07	0.22	3.05	0.8	6.16	0.56	0.38					0.1578	0.0913	0.1096	0.2131	0.8425	0.8989	0.8447	0.2858	0.2224	0.0965	0.1586	0.7603	0.4018	0.6315	0.016	0.2763	0.2788	0.7108	0.1032
	225			kynurenate	LC/MS neg	1417	C01717	HMDB00715	3845		2.36	0.51	1.1	0.22	0.47	2.15	0.5	0.21	0.33	0.41	0.67	1.62	2.55	0.54	1.02	0.77					0.067	0.0484	0.1236	0.2227	0.9522	0.9027	0.0013	0.0015	0.0591	0.0342	0.1382	0.7378	0.54	0.6611	0.018	0.2763	0.2158	0.6643	0.0717
	234			serotonin	LC/MS pos early	2342	C00780	HMDB00259	5202		0.97	0.96	1.02	0.99	1.05	1.06	0.65	1.07	0.6	1.65	0.92	0.56	1	0.68	1.12	0.59					0.3254	0.1532	0.5694	0.4018	0.5145	0.8711	0.6753	0.2445	0.1061	0.0549	0.2254	0.7603	0.8538	0.7184	0.489	0.6828	0.7405	0.805	0.3821
	237			5-hydroxyindoleacetate	LC/MS pos early	437	C05635	HMDB00763	1826		0.48	0.97	0.73	2	1.51	0.76	0.7	0.85	0.78	1.21	1.11	0.92	0.88	1.28	0.77	0.94					0.0423	0.0331	0.9592	0.5186	0.1914	0.8271	0.0473	0.0301	0.4463	0.1646	0.2088	0.7603	0.7666	0.6975	0.5669	0.6897	0.732	0.8006	0.3861
	241			indolelactate	LC/MS pos early	18349	C02043	HMDB00671	92904		0.77	0.48	0.84	0.63	1.09	1.74	0.45	0.66	0.78	1.46	1.72	1.17	1.32	0.78	1.81	1.22					0.4857	0.2054	0.0324	0.1516	0.739	0.8871	0.1381	0.073	0.7146	0.2331	0.0672	0.7068	0.0067	0.1823	0.1314	0.5032	0.3207	0.7381	0.1934
	242			indoleacetate	LC/MS neg	27513	C00954	HMDB00197	802		1.26	1.03	0.89	0.82	0.7	0.86	1.13	0.81	0.68	0.72	0.6	0.84	0.75	0.67	0.59	0.57					0.1229	0.0747	0.9468	0.5164	0.9374	0.9027	0.1082	0.0591	0.1058	0.0549	0.9906	0.8797	0.9816	0.7488	0.4282	0.6652	0.1786	0.6415	0.4416
	244			indolepropionate	LC/MS neg	32405		HMDB02302	3744		0.98	1.53	1.17	1.56	1.19	0.76	0.88	1.08	0.37	1.23	0.42	0.34	0.38	0.34	0.27	0.12					0.4086	0.1799	0.0649	0.1714	0.1542	0.7532	0.2942	0.1352	0.5405	0.1922	0.6583	0.8461	0.897	0.7311	0.8963	0.774	0.1437	0.5925	0.7951
	251			indoleacetylglycine	LC/MS neg	54730			446640		4.09	1.78	2.39	0.43	0.59	1.35	0.8	0.44	0.23	0.55	0.29	0.53	2.55	0.5	0.63	0.25					0.0069	0.0087	0.4862	0.3753	0.2048	0.8337	0.038	0.025	0.1267	0.0634	0.5611	0.8385	0.7229	0.6877	0.292	0.6103	0.0626	0.424	0.4814
	254			3-indoxyl sulfate	LC/MS neg	27672		HMDB00682	10258		0.59	0.89	0.84	1.5	1.42	0.94	0.73	0.8	0.73	1.1	0.99	0.9	0.86	1.06	0.77	0.74					0.107	0.0689	0.9519	0.5182	0.7468	0.8871	0.1202	0.0643	0.1931	0.0876	0.7928	0.8554	0.3944	0.6315	0.6255	0.7037	0.5095	0.7737	0.7141
	261		Leucine, Isoleucine and Valine Metabolism	leucine	LC/MS pos early	60	C00123	HMDB00687	6106		1.73	0.62	0.72	0.36	0.42	1.17	1.19	1.06	0.83	0.89	0.7	0.79	1.12	0.77	1.92	1.3					0.0105	0.0118	0.1118	0.2146	0.3426	0.8454	0.0001	0.0002	0.0008	0.0012	0.5094	0.8178	0.4968	0.6496	0.8578	0.7598	0.4048	0.7458	0.616
	262			N-acetylleucine	LC/MS neg	1587	C02710	HMDB11756	70912		5.18	0.58	1.33	0.11	0.26	2.3	1.55	0.25	0.49	0.16	0.32	1.98	2.25	0.67	0.97	0.84					0.0019	0.0035	0.2396	0.2756	0.6403	0.8871	5.276e-05	0.0001	0.0067	0.0067	0.1038	0.7342	0.894	0.7311	0.0193	0.2763	0.2641	0.7007	0.0139
	263			1-carboxyethylleucine	LC/MS neg	62559					2.78	0.49	0.32	0.17	0.11	0.65	1.73	1.29	0.82	0.74	0.48	0.64	1.05	0.65	2.79	2.75					0.0048	0.0065	0.2365	0.2756	0.0476	0.5877	0.0001	0.0003	1.0619e-05	8.9735e-05	0.4047	0.7603	0.1793	0.5138	0.5573	0.6897	0.4686	0.7737	0.4428
	265			4-methyl-2-oxopentanoate	LC/MS neg	22116	C00233	HMDB00695	70		0.85	0.97	1.52	1.14	1.79	1.57	0.84	0.74	0.75	0.89	0.89	1	0.83	0.82	0.64	0.41					0.1683	0.0953	0.9405	0.5145	0.6516	0.8871	0.1917	0.0955	0.0705	0.0394	0.599	0.8385	0.397	0.6315	0.5233	0.6828	0.6321	0.797	0.833
	272			isovalerylglycine	LC/MS neg	35107		HMDB00678	546304		9.19	0.56	1.61	0.06	0.18	2.86	0.07	0.02	0.03	0.33	0.42	1.25	25.58	0.2	1.09	0.48					0.018	0.0172	0.5269	0.3875	0.4835	0.8649	0.0035	0.0034	0.0859	0.0466	0.186	0.7603	0.1216	0.4772	0.0225	0.2939	0.0371	0.3344	0.4332
	273			isovalerylcarnitine (C5)	LC/MS pos early	34407		HMDB00688	6426851		1.81	1.11	0.96	0.61	0.53	0.87	1.57	0.78	1.11	0.49	0.71	1.43	1.31	1.14	0.91	1.52					0.0933	0.0633	0.5851	0.4077	0.8786	0.9027	0.2494	0.119	0.1254	0.0633	0.6937	0.8461	0.6717	0.6741	0.5874	0.6959	0.7461	0.8056	0.3359
	280			beta-hydroxyisovalerate	LC/MS polar	12129		HMDB00754	69362		0.88	0.59	0.68	0.67	0.78	1.16	0.98	0.98	0.74	1	0.76	0.75	0.97	1.09	1.62	1.05					0.8344	0.3028	0.0781	0.1862	0.2452	0.8454	0.118	0.0633	0.3384	0.1343	0.533	0.8235	0.8135	0.7084	0.9369	0.7765	0.4647	0.7737	0.8754
	296			isoleucine	LC/MS pos early	1125	C00407	HMDB00172	6306		1.78	0.59	0.72	0.33	0.4	1.22	1.09	0.94	0.84	0.87	0.77	0.89	1.19	0.73	1.91	1.4					0.0114	0.0124	0.0708	0.1785	0.3729	0.8621	5.5799e-05	0.0001	0.001	0.0015	0.3452	0.7603	0.7488	0.6963	0.8258	0.7593	0.4384	0.7558	0.5895
	298			N-acetylisoleucine	LC/MS neg	33967		HMDB61684	2802421		5.33	0.48	0.92	0.09	0.17	1.93	1.18	0.48	0.6	0.41	0.51	1.25	1.72	0.38	1.73	1.12					0.0003	0.0011	0.051	0.1605	0.5566	0.8871	6.0828e-07	1.8281e-05	5.6743e-05	0.0002	0.1637	0.7603	0.9963	0.7488	0.0855	0.4524	0.2256	0.6744	0.0864
	299			1-carboxyethylisoleucine	LC/MS neg	62558					2.85	0.43	0.25	0.15	0.09	0.59	1.64	1.2	0.9	0.73	0.55	0.76	0.97	0.56	2.72	3.49					0.0036	0.0054	0.1812	0.2515	0.0261	0.4924	6.6546e-05	0.0002	3.2696e-06	4.6218e-05	0.3482	0.7603	0.2812	0.5738	0.6829	0.7066	0.5765	0.7781	0.4999
	300			3-methyl-2-oxovalerate	LC/MS neg	15676	C00671	HMDB03736	47		0.87	0.89	1.48	1.03	1.71	1.66	0.87	0.72	0.8	0.82	0.92	1.11	0.97	0.97	0.78	0.52					0.3132	0.15	0.7971	0.4645	0.5072	0.8687	0.4502	0.1867	0.0987	0.0522	0.359	0.7603	0.6703	0.6741	0.4345	0.6652	0.7009	0.798	0.7203
	301			alpha-hydroxyisovalerate	LC/MS neg	33937		HMDB00407	99823		0.45	0.26	0.53	0.57	1.19	2.08	0.25	0.25	0.18	1	0.72	0.73	2.51	1.42	2.47	0.86					0.3069	0.1481	0.0175	0.1173	0.3478	0.8455	0.1563	0.081	0.9328	0.2882	0.134	0.7378	0.0018	0.0874	0.0015	0.1161	0.0002	0.0199	0.9576
	303			2-methylbutyrylcarnitine (C5)	LC/MS pos early	45095		HMDB00378	6426901		2.07	0.82	0.97	0.4	0.47	1.17	1.34	0.41	0.96	0.31	0.71	2.33	1.83	1.19	0.91	1.81					0.0229	0.0207	0.7613	0.4595	0.9733	0.9106	0.0109	0.009	0.0248	0.0182	0.736	0.851	0.6501	0.6738	0.0284	0.3082	0.9723	0.8427	0.0094
	306			tiglylcarnitine (C5:1-DC)	LC/MS pos early	35428		HMDB02366	22833596		1.24	0.81	0.73	0.65	0.59	0.9	0.77	0.54	0.54	0.7	0.71	1.01	1.53	0.95	1.01	1.14					0.2682	0.1352	0.4702	0.3726	0.2697	0.8454	0.0714	0.0421	0.0306	0.0208	0.6984	0.8461	0.815	0.7084	0.1896	0.5607	0.1998	0.6623	0.2783
	309			3-hydroxy-2-ethylpropionate	LC/MS neg	32397		HMDB00396	188979		0.58	0.37	0.68	0.64	1.16	1.81	0.41	0.34	0.49	0.84	1.21	1.43	2.16	1.52	1.99	1.58					0.3463	0.1602	0.0629	0.1714	0.5462	0.8867	0.3427	0.1514	0.7324	0.238	0.1995	0.7603	0.0112	0.1893	0.0032	0.1713	0.0273	0.2816	0.6318
	311			ethylmalonate	LC/MS polar	15765		HMDB00622	11756		2.82	0.86	0.94	0.3	0.33	1.1	1.68	0.83	0.95	0.5	0.57	1.14	1.23	0.73	1.2	1.25					0.0003	0.0011	0.7378	0.4558	0.8075	0.8942	0.0001	0.0002	0.0002	0.0004	0.9274	0.8666	0.228	0.5472	0.5099	0.6828	0.897	0.8237	0.0661
	312			methylsuccinate	LC/MS polar	15745		HMDB01844	10349		3.95	0.65	1.12	0.16	0.28	1.74	2.49	0.58	0.76	0.23	0.31	1.31	1.14	0.72	1.03	0.77					0.0046	0.0063	0.6535	0.4371	0.6204	0.8871	0.0013	0.0015	0.0165	0.0137	0.347	0.7603	0.1745	0.5138	0.1381	0.5112	0.2696	0.7007	0.0061
	318			valine	LC/MS pos early	1649	C00183	HMDB00883	6287		1.82	0.5	0.66	0.28	0.36	1.31	1.18	0.98	0.85	0.83	0.72	0.87	1.08	0.7	2.11	1.39					0.0095	0.011	0.0397	0.1566	0.2964	0.8454	1.8951e-05	8.7593e-05	0.0005	0.0009	0.292	0.7603	0.5671	0.6611	0.8618	0.7598	0.4382	0.7558	0.4562
	319			N-acetylvaline	LC/MS neg	1591		HMDB11757	66789		1.81	0.64	0.84	0.35	0.46	1.32	1.18	0.93	0.87	0.79	0.74	0.94	1.26	0.82	1.84	1.31					0.0019	0.0035	0.1142	0.2165	0.6135	0.8871	1.443e-05	8.1314e-05	0.0004	0.0009	0.2755	0.7603	0.5016	0.6496	0.4001	0.6652	0.3686	0.7458	0.1342
	321			1-carboxyethylvaline	LC/MS neg	62562					2.15	0.44	0.26	0.2	0.12	0.59	1.55	1.17	0.87	0.76	0.56	0.74	0.93	0.67	2.5	3.18					0.0136	0.014	0.1318	0.2293	0.021	0.4915	0.0002	0.0003	1.247e-05	8.9735e-05	0.3922	0.7603	0.2991	0.5874	0.7011	0.719	0.4662	0.7737	0.5096
	323			3-methyl-2-oxobutyrate	LC/MS polar	44526	C00141	HMDB00019	49		0.74	0.72	1.55	0.97	2.1	2.16	0.76	0.38	0.43	0.5	0.57	1.13	0.93	0.96	0.5	0.26					0.177	0.0988	0.4296	0.3605	0.4732	0.8649	0.5677	0.217	0.0422	0.0265	0.1359	0.7378	0.6004	0.6636	0.0692	0.427	0.0928	0.4637	0.1881
	324			2-hydroxy-3-methylvalerate	LC/MS neg	36746		HMDB00317	164623		1.33	0.49	0.54	0.37	0.41	1.11	0.28	0.25	0.25	0.91	0.92	1.02	2.06	0.43	1.05	0.96					0.8686	0.3094	0.0753	0.1825	0.214	0.8337	0.0532	0.0331	0.1608	0.077	0.5763	0.8385	0.0035	0.1215	0.0016	0.1161	0.0016	0.0515	0.7775
	326			isobutyrylcarnitine (C4)	LC/MS pos early	33441		HMDB00736	168379		0.92	0.85	1.08	0.93	1.17	1.26	1.28	0.44	1.11	0.34	0.87	2.53	1.47	2.04	0.76	1.52					0.5304	0.2183	0.7478	0.4568	0.9183	0.9027	0.7588	0.2662	0.466	0.1715	0.6717	0.8461	0.9842	0.7488	0.0282	0.3082	0.8923	0.8231	0.0295
	328			3-hydroxyisobutyrate	LC/MS polar	1549	C06001	HMDB00336	87		0.95	0.64	0.81	0.67	0.86	1.27	1.11	0.48	0.76	0.43	0.69	1.59	1.56	1.83	1.17	1.47					0.9948	0.3399	0.0906	0.194	0.5189	0.8729	0.0918	0.0512	0.5231	0.1878	0.2851	0.7603	0.8073	0.7084	0.0242	0.2939	0.387	0.7458	0.0423
	332		Methionine, Cysteine, SAM and Taurine Metabolism	methionine	LC/MS pos early	1302	C00073	HMDB00696	6137		1.48	1.02	0.91	0.69	0.62	0.89	1.29	1.26	0.93	0.98	0.72	0.74	1.36	1.19	1.68	1.39					0.0432	0.0332	0.7243	0.4541	0.9795	0.9106	0.0909	0.0512	0.0408	0.0258	0.7052	0.8462	0.3459	0.6297	0.5082	0.6828	0.5644	0.7773	0.7761
	333			N-acetylmethionine	LC/MS neg	1589	C02712	HMDB11745	448580		1.08	0.48	0.47	0.45	0.44	0.98	1.4	1.08	0.86	0.77	0.61	0.8	1.07	1.4	2.39	1.94					0.5052	0.211	0.0461	0.1585	0.0547	0.5877	0.0094	0.0079	0.0114	0.0101	0.9374	0.8683	0.2843	0.5746	0.8675	0.7618	0.5226	0.7737	0.3645
	334			N-formylmethionine	LC/MS neg	2829	C03145	HMDB01015	439750		1.11	0.77	0.87	0.7	0.79	1.13	0.97	1.17	0.88	1.2	0.9	0.75	1.31	1.15	1.98	1.32					0.4376	0.1899	0.2706	0.2903	0.6328	0.8871	0.0645	0.0388	0.213	0.0938	0.5286	0.8193	0.8245	0.7093	0.7612	0.7367	0.5355	0.7749	0.5996
	336			methionine sulfone	LC/MS pos early	44878			69961		1.53	0.68	0.6	0.44	0.39	0.88	1.48	1	1.59	0.68	1.08	1.59	0.4	0.39	0.59	1.07					0.0837	0.0584	0.6864	0.446	0.4163	0.8649	0.0352	0.0237	0.0132	0.0114	0.6806	0.8461	0.3294	0.6131	0.9978	0.7901	0.4649	0.7737	0.3308
	337			methionine sulfoxide	LC/MS pos early	18374	C02989	HMDB02005	158980		0.62	0.58	0.59	0.94	0.95	1.02	0.51	0.63	0.4	1.24	0.78	0.63	1.52	1.26	1.67	1.04					0.3195	0.1515	0.1216	0.2218	0.1464	0.743	0.5693	0.217	0.6386	0.2167	0.9204	0.8666	0.0523	0.347	0.2005	0.5638	0.0052	0.1037	0.489
	338			N-acetylmethionine sulfoxide	LC/MS pos early	45428			193368		0.81	0.31	0.37	0.38	0.46	1.2	0.52	0.52	0.36	1	0.7	0.7	1.91	1.22	3.18	1.85					0.6298	0.2463	0.0001	0.0111	0.0035	0.2321	0.0006	0.0009	0.0125	0.0109	0.283	0.7603	0.019	0.2502	0.0345	0.3493	0.0008	0.0403	0.7999
	342			S-adenosylmethionine (SAM)	LC/MS pos early	15915	C00019	HMDB01185	34756		2.68	0.91	0.83	0.34	0.31	0.91	1.22	1.4	0.99	1.14	0.81	0.71	1.31	0.6	2.01	1.57					0.0233	0.0209	0.7925	0.463	0.5632	0.8871	0.0123	0.0096	0.0054	0.0057	0.7521	0.8554	0.7273	0.6889	0.5125	0.6828	0.7904	0.8134	0.7584
	343			S-adenosylhomocysteine (SAH)	LC/MS neg	42382	C00021	HMDB00939	439155		5.96	0.77	0.63	0.13	0.1	0.81	2.19	1.13	1.13	0.52	0.52	1	0.7	0.26	1.03	1.28					0.0002	0.0007	0.5497	0.3952	0.1823	0.8271	2.7395e-05	0.0001	2.4627e-06	3.7977e-05	0.4553	0.7775	0.0595	0.3695	0.7317	0.7271	0.6512	0.798	0.1187
	345			2,3-dihydroxy-5-methylthio-4-pentenoate (DMTPA)*	LC/MS neg	62805					1.04	0.87	0.89	0.84	0.85	1.02	0.62	0.67	0.49	1.08	0.8	0.74	1.35	0.8	1.04	0.76					0.5182	0.2144	0.5189	0.3851	0.8376	0.8989	0.2001	0.0991	0.3959	0.1511	0.6591	0.8461	0.251	0.5493	0.1251	0.5032	0.0232	0.2698	0.6902
	349			cystathionine	LC/MS pos early	15705	C02291	HMDB00099	439258		6.31	2.32	1.43	0.37	0.23	0.62	4.18	1.04	2.54	0.25	0.61	2.45	1.28	0.85	0.58	2.28					0.0104	0.0117	0.5182	0.3851	0.7712	0.8871	0.0481	0.0304	0.0212	0.0163	0.7214	0.851	0.0945	0.4538	0.5746	0.6931	0.6095	0.7874	0.0281
	351			cysteine	LC/MS pos early	1868	C00097	HMDB00574	5862		1.24	0.79	0.97	0.64	0.79	1.23	5.54	0.99	1.5	0.18	0.27	1.51	0.84	3.77	1.05	1.29					0.3903	0.1755	0.7342	0.455	0.9214	0.9027	0.2332	0.1118	0.3389	0.1343	0.8096	0.8554	0.0867	0.4413	0.7043	0.7192	0.537	0.7749	0.0386
	353			S-methylcysteine	LC/MS pos early	39592		HMDB02108	24417		1.97	1.22	1.09	0.62	0.55	0.9	1.33	1.09	1.14	0.82	0.86	1.05	2.07	1.4	1.86	2.17					0.0327	0.0272	0.9292	0.5125	0.7238	0.8871	0.0266	0.0184	0.0706	0.0394	0.6585	0.8461	0.563	0.6611	0.8448	0.7598	0.8549	0.8189	0.7014
	354			S-methylcysteine sulfoxide	LC/MS pos early	43378		HMDB29432	82142		0.57	1.44	0.94	2.51	1.63	0.65	1.63	1.88	2.34	1.15	1.44	1.24	1.11	3.15	1.45	2.77					0.5216	0.2154	0.9889	0.5249	0.8648	0.9027	0.5307	0.2066	0.4183	0.1577	0.8538	0.8554	0.2635	0.5649	0.0824	0.4411	0.0778	0.4553	0.5211
	357			cystine	LC/MS pos early	56	C00491	HMDB00192	67678		0.16	0.15	1.38	0.93	8.6	9.26	10.46	0.35	0.43	0.03	0.04	1.22	0.96	62.89	2.25	0.3					0.0391	0.0313	0.0645	0.1714	0.7492	0.8871	0.8176	0.2819	0.0776	0.0425	0.1222	0.7378	0.9688	0.7468	0.0561	0.3894	0.131	0.5546	0.0516
	360			lanthionine	LC/MS pos early	42002			98504		6.47	2.34	7.29	0.36	1.13	3.11	41.69	25.96	11.24	0.62	0.27	0.43	0.44	2.86	4.93	0.69					0.05	0.0375	0.8704	0.4911	0.4537	0.8649	0.0707	0.0418	0.2135	0.0938	0.5569	0.8385	0.0063	0.1823	0.3455	0.6484	0.0869	0.4637	0.0612
	362			cysteine sulfinic acid	LC/MS pos early	37443	C00606	HMDB00996	109		5.87	1.85	1.19	0.32	0.2	0.64	5.21	0.75	2.26	0.14	0.43	3.03	0.97	0.86	0.39	1.84					0.0028	0.0046	0.3246	0.3133	0.5756	0.8871	0.0347	0.0236	0.0124	0.0109	0.6674	0.8461	0.0078	0.1823	0.8774	0.7665	0.1257	0.5371	0.0052
	363			hypotaurine	LC/MS polar	590	C00519	HMDB00965	107812		0.93	1.03	1	1.11	1.08	0.97	3.22	1.48	2	0.46	0.62	1.36	0.6	2.07	0.86	1.2					0.3564	0.1637	0.3516	0.3268	0.3687	0.86	0.9924	0.3196	0.9811	0.2981	0.9736	0.8784	0.0235	0.2502	0.5561	0.6897	0.1574	0.6118	0.0858
	364			taurine	LC/MS neg	2125	C00245	HMDB00251	1123		1.71	1.04	0.78	0.61	0.46	0.75	1.14	0.83	0.91	0.73	0.8	1.11	1.11	0.74	0.89	1.3					0.0088	0.0104	0.8114	0.4694	0.2702	0.8454	0.016	0.012	0.0004	0.0008	0.182	0.7603	0.6434	0.6738	0.2916	0.6103	0.6486	0.798	0.1326
	365			N-acetyltaurine	LC/MS neg	48187			159864		1.46	0.68	0.96	0.46	0.65	1.41	0.92	0.74	0.77	0.8	0.83	1.04	1.05	0.66	1.14	0.84					0.0163	0.0163	0.1568	0.2439	0.9098	0.9027	0.0003	0.0005	0.0215	0.0164	0.1274	0.7378	0.748	0.6963	0.1291	0.5032	0.2061	0.6623	0.2274
	367			taurocyamine	LC/MS pos early	35117	C01959	HMDB03584	68340		3.51	1.03	0.92	0.29	0.26	0.9	1.66	1.05	1.12	0.63	0.68	1.07	1.09	0.51	1.11	1.32					0.0006	0.0015	0.7264	0.4541	0.9289	0.9027	0.0015	0.0017	0.0007	0.0012	0.7942	0.8554	0.4906	0.6496	0.9944	0.7901	0.7793	0.8134	0.4949
	371		Urea cycle; Arginine and Proline Metabolism	arginine	LC/MS pos early	1638	C00062	HMDB00517	232		0.45	1.1	1.06	2.47	2.38	0.96	0.83	1.52	0.62	1.82	0.74	0.41	1.54	2.88	2.12	0.9					0.0015	0.0031	0.773	0.4595	0.7176	0.8871	0.0007	0.0009	0.0005	0.001	0.9415	0.8683	0.2709	0.5703	0.5339	0.6828	0.5736	0.7773	0.0889
	372			argininosuccinate	LC/MS pos early	15497	C03406	HMDB00052	828		0.7	0.78	0.54	1.12	0.78	0.7	1.84	1.92	1.43	1.04	0.78	0.75	0.8	2.1	1.95	2.09					0.1141	0.0718	0.6944	0.4482	0.3073	0.8454	0.2297	0.1108	0.5644	0.1974	0.5268	0.8193	0.5438	0.6611	0.1708	0.5607	0.4184	0.7458	0.4387
	373			urea	LC/MS pos early	1670	C00086	HMDB00294	1176		0.96	0.6	0.75	0.62	0.78	1.25	0.77	0.75	0.73	0.98	0.95	0.97	1.14	0.92	1.44	1.12					0.6101	0.2411	0.0746	0.1824	0.4914	0.8649	0.0241	0.0169	0.2339	0.0992	0.2626	0.7603	0.4745	0.6496	0.4275	0.6652	0.3428	0.745	0.9368
	375			ornithine	LC/MS pos early	1493	C00077	HMDB03374	6262		1.78	0.43	0.84	0.24	0.47	1.94	1.17	0.76	0.82	0.65	0.7	1.08	1.01	0.67	1.78	0.99					0.0641	0.0468	0.0101	0.0984	0.4056	0.8649	4.1394e-05	0.0001	0.009	0.0083	0.0703	0.7068	0.6625	0.6741	0.3498	0.6502	0.5209	0.7737	0.1735
	379			2-oxoarginine*	LC/MS pos early	55072	C03771	HMDB04225	558		2.68	0.84	0.81	0.31	0.3	0.96	0.93	0.93	0.62	1	0.66	0.66	1.14	0.39	1.26	0.87					0.0006	0.0016	0.2129	0.2673	0.3868	0.8649	1.2614e-05	7.9218e-05	4.336e-05	0.0001	0.6981	0.8461	0.7199	0.6877	0.8201	0.7571	0.0538	0.3982	0.8954
	380			citrulline	LC/MS pos early	2132	C00327	HMDB00904	9750		1.02	1.01	1.08	0.99	1.06	1.07	1.17	0.84	0.86	0.72	0.74	1.02	1.18	1.35	0.99	0.94					0.8973	0.3179	0.9338	0.5133	0.7598	0.8871	0.8321	0.283	0.8597	0.2721	0.6976	0.8461	0.6383	0.6738	0.4194	0.6652	0.5377	0.7749	0.734
	382			homocitrulline	LC/MS pos early	22138	C02427	HMDB00679	65072		2.18	1.13	0.82	0.52	0.38	0.73	3.33	1.77	1.75	0.53	0.52	0.99	0.76	1.15	1.19	1.61					0.1571	0.0911	0.5396	0.391	0.8052	0.8942	0.4152	0.177	0.0987	0.0522	0.3911	0.7603	0.4621	0.6496	0.2609	0.5994	0.3471	0.745	0.6929
	383			proline	LC/MS pos early	1898	C00148	HMDB00162	145742		1.13	0.6	0.72	0.53	0.63	1.18	1.23	1.35	0.79	1.1	0.65	0.59	1	1.09	2.24	1.11					0.3213	0.152	0.0919	0.1941	0.2537	0.8454	0.0093	0.0079	0.0366	0.0242	0.5727	0.8385	0.4952	0.6496	0.4639	0.68	0.2864	0.7184	0.9595
	386			dimethylarginine (SDMA + ADMA)	LC/MS pos early	36808	C03626	HMDB01539	123831		1.09	0.47	0.44	0.43	0.41	0.95	1.56	1.49	0.86	0.96	0.55	0.58	0.85	1.21	2.69	1.64					0.4938	0.2076	0.0447	0.1585	0.0939	0.6574	0.0086	0.0075	0.0208	0.0162	0.7227	0.851	0.2272	0.5472	0.4238	0.6652	0.6162	0.7896	0.6779
	387			N-acetylarginine	LC/MS pos early	33953	C02562	HMDB04620	67427		0.89	0.71	1.51	0.79	1.69	2.13	4.05	0.99	1.04	0.24	0.26	1.06	0.88	3.98	1.23	0.61					0.7878	0.2909	0.6605	0.4378	0.5148	0.8711	0.4797	0.1939	0.7013	0.2306	0.278	0.7603	0.1432	0.4971	0.9596	0.7866	0.7283	0.8006	0.1304
	390			N-acetylcitrulline	LC/MS neg	48434	C15532	HMDB00856	656979		6.14	0.36	1.71	0.06	0.28	4.81	7.34	0.17	0.17	0.02	0.02	0.95	2.37	2.83	1.15	0.23					0.1274	0.0771	0.2633	0.2903	0.5713	0.8871	0.0103	0.0086	0.33	0.132	0.0959	0.7325	0.5887	0.6632	0.1919	0.5609	0.1888	0.6487	0.0685
	393			N-alpha-acetylornithine	LC/MS pos early	32984	C00437	HMDB03357	439232		14	0.79	2.02	0.06	0.14	2.55	2.9	0.41	0.25	0.14	0.09	0.62	1.99	0.41	1.02	0.25					0.0007	0.0016	0.4946	0.3778	0.3336	0.8454	8.2132e-05	0.0002	0.0097	0.0089	0.1031	0.7342	0.2304	0.5472	0.189	0.5607	0.1029	0.4784	0.0146
	397			trans-4-hydroxyproline	LC/MS pos early	32306	C01157	HMDB00725	5810		0.37	0.44	0.64	1.18	1.74	1.48	0.79	1.48	0.96	1.88	1.22	0.65	0.79	1.69	2.7	1.19					0.0005	0.0014	0.1034	0.2077	0.3445	0.8454	0.0409	0.0262	0.0074	0.0072	0.4818	0.8018	0.9938	0.7488	0.2253	0.5781	0.6478	0.798	0.2225
	399			pro-hydroxy-pro	LC/MS pos early	35127		HMDB06695	11673055		0.27	0.32	0.58	1.2	2.14	1.78	0.48	1.17	0.65	2.42	1.35	0.56	0.8	1.43	2.88	0.9					0.0076	0.0094	0.0454	0.1585	0.4168	0.8649	0.4605	0.19	0.0534	0.0317	0.2203	0.7603	0.3756	0.6315	0.5251	0.6828	0.8128	0.8152	0.1321
	402			N-methylproline	LC/MS pos early	37431			557		1.14	0.96	0.89	0.84	0.78	0.93	2.4	1.48	0.67	0.62	0.28	0.45	0.81	1.7	1.25	0.61					0.8222	0.3002	0.8672	0.4911	0.6319	0.8871	0.6953	0.2488	0.4825	0.1749	0.7549	0.8554	0.1097	0.4657	0.263	0.5994	0.5253	0.7737	0.6195
	404			N-monomethylarginine	LC/MS pos early	43586	C03884	HMDB29416	132862		1.05	0.63	0.57	0.6	0.54	0.9	1.39	1.41	0.9	1.01	0.65	0.64	0.88	1.17	1.98	1.41					0.5429	0.2208	0.1642	0.244	0.1924	0.8271	0.049	0.0309	0.0595	0.0343	0.9277	0.8666	0.3611	0.6315	0.4359	0.6652	0.6693	0.798	0.8919
	405			argininate*	LC/MS pos early	57461		HMDB03148	160437		29.82	0.87	0.87	0.03	0.03	0.99	5.01	0.61	0.58	0.12	0.12	0.96	1.6	0.27	1.12	1.08					4.8306e-05	0.0003	0.8432	0.4794	0.8375	0.8989	2.5842e-05	0.0001	2.5245e-05	0.0001	0.9941	0.8797	0.5022	0.6496	0.4888	0.6828	0.4605	0.7737	0.1765
	408			N-acetylhomocitrulline	LC/MS pos early	62707					5.63	0.38	0.93	0.07	0.17	2.48	6.18	0.28	0.34	0.05	0.05	1.21	2.04	2.25	1.53	0.74					0.0431	0.0332	0.3726	0.3328	0.9638	0.9074	0.0047	0.0045	0.0476	0.029	0.3491	0.7603	0.5075	0.65	0.3383	0.645	0.417	0.7458	0.1093
	409			dimethylguanidino valeric acid (DMGV)*	LC/MS pos early	62783					0.17	0.19	0.3	1.12	1.78	1.59	0.12	0.1	0.08	0.84	0.67	0.81	1.49	1.07	0.8	0.4					0.0041	0.006	0.0091	0.0974	0.0762	0.6384	0.7636	0.2669	0.2282	0.0981	0.3625	0.7603	2.3304e-06	0.001	1.2059e-06	0.0005	3.3839e-07	0.0002	0.8394
	410		Creatine & Polyamine Metabolism	guanidinoacetate	LC/MS pos early	43802	C00581	HMDB00128	763		0.87	0.63	1.42	0.72	1.64	2.27	7.2	2.38	1.43	0.33	0.2	0.6	0.75	6.24	2.85	0.75					0.747	0.2807	0.3617	0.3291	0.6983	0.8871	0.5533	0.2136	0.4786	0.1739	0.1967	0.7603	0.0074	0.1823	0.0653	0.4097	0.3012	0.7314	0.3596
	411			creatine	LC/MS pos early	27718	C00300	HMDB00064	586		0.56	1.06	0.87	1.89	1.55	0.82	0.75	0.94	0.8	1.25	1.07	0.86	1.29	1.73	1.14	1.2					0.0111	0.0123	0.9969	0.5253	0.6868	0.8871	0.011	0.009	0.0295	0.0205	0.684	0.8461	0.2371	0.5472	0.808	0.7543	0.4751	0.7737	0.345
	412			creatinine	LC/MS pos early	513	C00791	HMDB00562	588		0.66	0.95	0.89	1.45	1.36	0.94	0.86	0.99	0.79	1.15	0.91	0.8	1.25	1.64	1.29	1.1					0.0869	0.0605	0.638	0.4307	0.8483	0.8989	0.2075	0.102	0.126	0.0634	0.7797	0.8554	0.5871	0.6632	0.9707	0.7873	0.5068	0.7737	0.5622
	413			creatine phosphate	LC/MS polar	33951	C02305	HMDB01511	587		0.3	0.41	0.98	1.38	3.3	2.39	0.34	1.11	1.93	3.23	5.63	1.74	0.76	0.88	2.07	1.5					0.04	0.0316	0.2402	0.2756	0.9199	0.9027	0.3577	0.1569	0.0319	0.0215	0.2033	0.7603	0.4129	0.6315	0.4422	0.6652	0.0718	0.4418	0.1167
	418			putrescine	LC/MS pos early	1408	C00134	HMDB01414	1045		0.62	0.95	1.06	1.52	1.7	1.11	0.82	1.28	1.42	1.56	1.73	1.11	1.49	1.96	2	2					0.3512	0.1617	0.6719	0.4401	0.9598	0.9053	0.6083	0.2266	0.3262	0.1308	0.6357	0.8461	0.6063	0.6636	0.5661	0.6897	0.5691	0.7773	0.2787
	420			N-acetyl-isoputreanine*	LC/MS pos early	62309					3.15	0.86	1.22	0.27	0.39	1.42	0.5	0.15	0.11	0.3	0.22	0.73	9.86	1.55	1.7	0.88					0.0062	0.008	0.6662	0.4387	0.4613	0.8649	0.0019	0.002	0.0379	0.0245	0.2456	0.7603	0.5366	0.659	0.0122	0.2763	0.0014	0.0469	0.0523
	421			spermidine	LC/MS pos early	485	C00315	HMDB01257	1102		0.97	0.55	0.98	0.56	1	1.79	1.29	3.3	1.1	2.57	0.86	0.33	0.97	1.28	5.86	1.1					0.5373	0.2192	0.2441	0.2776	0.8611	0.9027	0.0787	0.0455	0.6579	0.2219	0.182	0.7603	0.5187	0.6579	0.1127	0.5032	0.7902	0.8134	0.3376
	423			N('1)-acetylspermidine	LC/MS pos early	57689	C00612	HMDB01276	496		1.03	0.52	0.74	0.5	0.72	1.42	0.69	0.6	0.54	0.87	0.77	0.89	2.11	1.42	2.46	1.54					0.2829	0.14	0.363	0.3291	0.6936	0.8871	0.0514	0.032	0.1453	0.0706	0.6036	0.8385	0.5634	0.6611	0.4002	0.6652	0.1997	0.6623	0.7903
	426			spermine	LC/MS pos late	603	C00750	HMDB01256	1103		0.61	0.46	3.14	0.75	5.15	6.85	0.9	28.81	3.3	31.9	3.65	0.11	0.65	0.96	40.71	0.68					0.7042	0.2693	0.4012	0.3488	0.6007	0.8871	0.6436	0.2363	0.3683	0.143	0.1764	0.7603	0.9901	0.7488	0.0171	0.2763	0.1902	0.6487	0.0176
	429			5-methylthioadenosine (MTA)	LC/MS pos early	1419	C00170	HMDB01173	439176		2.46	1.13	1.55	0.46	0.63	1.37	1.42	1.55	1.63	1.09	1.15	1.05	0.98	0.57	1.35	1.03					0.0371	0.0301	0.7537	0.458	0.4921	0.8649	0.0178	0.0132	0.1512	0.0733	0.3189	0.7603	0.4999	0.6496	0.3234	0.6313	0.3726	0.7458	0.7514
	430			N-acetylputrescine	LC/MS pos early	37496	C02714	HMDB02064	122356		0.47	1.44	1.33	3.03	2.8	0.92	0.69	1.03	1.67	1.51	2.43	1.61	2.09	3.02	1.5	2.62					0.044	0.0335	0.9616	0.5186	0.7289	0.8871	0.0395	0.0255	0.0197	0.0156	0.7653	0.8554	0.7148	0.6877	0.772	0.7439	0.555	0.7773	0.5133
	439		Guanidino and Acetamido Metabolism	4-guanidinobutanoate	LC/MS pos early	15681	C01035	HMDB03464	500		43.21	3.84	1.62	0.09	0.04	0.42	1.51	1.4	0.58	0.92	0.38	0.42	1.22	0.04	0.44	0.44					1.5512e-07	1.7325e-05	0.0039	0.0734	0.1226	0.6884	0.0021	0.0022	2.4801e-05	0.0001	0.1453	0.7406	0.4347	0.6455	0.6365	0.7037	0.2023	0.6623	0.7561
	442		Glutathione Metabolism	glutathione, reduced (GSH)	LC/MS pos early	2127	C00051	HMDB00125	124886		18.65	1.94	1.1	0.1	0.06	0.57	5.08	2.34	2.23	0.46	0.44	0.95	1.08	0.29	1.3	2.18					0.0017	0.0033	0.3651	0.3291	0.3394	0.8454	0.0189	0.0137	9.7398e-05	0.0003	0.067	0.7068	0.2285	0.5472	0.3285	0.6345	0.691	0.798	0.8162
	443			glutathione, oxidized (GSSG)	LC/MS pos early	27727	C00127	HMDB03337	65359		2.59	0.85	0.69	0.33	0.27	0.81	1.92	1.47	1.1	0.77	0.57	0.75	1.03	0.76	1.79	1.64					0.0328	0.0272	0.7471	0.4568	0.3269	0.8454	0.0152	0.0115	0.0027	0.0033	0.5081	0.8178	0.6163	0.671	0.2309	0.5781	0.6084	0.7874	0.4809
	445			cysteine-glutathione disulfide	LC/MS pos early	35159		HMDB00656	4247235		0.45	0.35	0.77	0.79	1.72	2.19	0.77	0.55	0.52	0.71	0.67	0.94	1.16	2.01	1.82	0.78					0.1858	0.1022	0.0261	0.1379	0.4191	0.8649	0.3409	0.1512	0.5992	0.2069	0.1431	0.7406	0.4588	0.6496	0.0655	0.4097	0.0984	0.4685	0.2587
	446			S-methylglutathione	LC/MS neg	33944	C11347		3605667		39.17	1.28	0.67	0.03	0.02	0.52	22.11	1.1	1.32	0.05	0.06	1.2	0.88	0.5	0.76	1.74					4.7963e-05	0.0003	0.5198	0.3851	0.717	0.8871	0.0004	0.0005	1.5164e-05	9.1556e-05	0.3165	0.7603	0.1564	0.5061	0.8619	0.7598	0.8567	0.8189	0.2116
	447			S-lactoylglutathione	LC/MS neg	15731	C03451	HMDB01066	440018		1.68	0.62	0.24	0.37	0.14	0.39	3.03	3.33	2.3	1.1	0.76	0.69	0.48	0.87	2.61	4.62					0.1099	0.0698	0.9924	0.525	0.2361	0.8454	0.112	0.0607	0.0071	0.007	0.2325	0.7603	0.2714	0.5703	0.1846	0.5607	0.1654	0.6376	0.8156
	448			cysteinylglycine	LC/MS pos early	35637	C01419	HMDB00078	439498		7.72	1.1	1.25	0.14	0.16	1.13	2.26	0.91	1.35	0.41	0.6	1.48	1.3	0.38	1.08	1.4					0.0112	0.0123	0.9631	0.5186	0.8657	0.9027	0.01	0.0083	0.017	0.014	0.8295	0.8554	0.2203	0.5472	0.8997	0.7741	0.5777	0.7781	0.27
	451			5-oxoproline	LC/MS neg	1494	C01879	HMDB00267	7405		1.4	0.73	1.17	0.52	0.84	1.6	2.45	1.05	1.45	0.43	0.59	1.38	0.89	1.57	1.28	1.1					0.1812	0.1	0.3882	0.3405	0.9512	0.9027	0.0312	0.0214	0.2013	0.0899	0.3559	0.7603	0.0644	0.3779	0.8779	0.7665	0.4013	0.7458	0.0883
	454			2-hydroxybutyrate/2-hydroxyisobutyrate	LC/MS polar	52281					11.82	0.66	0.81	0.06	0.07	1.24	0.58	0.15	0.19	0.26	0.33	1.26	4.73	0.23	1.1	1.12					3.994e-05	0.0003	0.4891	0.3755	0.868	0.9027	4.334e-06	4.6029e-05	2.3589e-05	0.0001	0.5983	0.8385	0.1853	0.5149	0.0041	0.1779	0.0166	0.2223	0.0978
	456			ophthalmate	LC/MS pos early	34592		HMDB05765	7018721		9.78	1.23	0.89	0.13	0.09	0.72	1.53	0.9	0.47	0.59	0.31	0.52	2.32	0.36	1.7	1.23					0.0006	0.0015	0.8055	0.4678	0.5451	0.8867	0.0012	0.0014	9.1488e-05	0.0003	0.3959	0.7603	0.8233	0.7093	0.6546	0.7054	0.3355	0.745	0.5033
	459			4-hydroxy-nonenal-glutathione	LC/MS neg	48487					1.48	1.19	1.03	0.8	0.69	0.87	0.66	0.88	0.38	1.33	0.58	0.43	2.84	1.27	2.12	1.06					0.1698	0.0958	0.5359	0.3909	0.839	0.8989	0.4436	0.1852	0.1169	0.0595	0.412	0.7603	0.4469	0.6496	0.8427	0.7598	0.0373	0.3344	0.3389
	460			3'-dephospho-CoA-glutathione*	LC/MS neg	62807					5.4	1.13	0.78	0.21	0.14	0.68	2.73	1.27	1.15	0.47	0.42	0.9	0.95	0.48	1.06	1.4					0.0061	0.008	0.6642	0.4383	0.6207	0.8871	0.0184	0.0135	0.0016	0.0022	0.3548	0.7603	0.3837	0.6315	0.5438	0.6843	0.6752	0.798	0.7898
	461			CoA-glutathione*	LC/MS neg	62804	C00920		11953788		4.5	1.21	0.98	0.27	0.22	0.81	3.06	1.77	2.04	0.58	0.67	1.15	0.57	0.39	0.84	1.2					0.0153	0.0154	0.5264	0.3875	0.4874	0.8649	0.0654	0.0392	0.0024	0.0031	0.1878	0.7603	0.2161	0.5472	0.2162	0.5696	0.0929	0.4637	0.9999
	465	Peptide	Gamma-glutamyl Amino Acid	gamma-glutamylalanine	LC/MS pos early	37063		HMDB29142	440103		0.36	0.58	1.35	1.62	3.76	2.31	1.13	0.31	0.87	0.27	0.77	2.83	0.85	2.68	0.45	0.55					0.2116	0.1127	0.6557	0.4376	0.6459	0.8871	0.4169	0.1773	0.0909	0.0491	0.3672	0.7603	0.6784	0.6741	0.0585	0.3962	0.4008	0.7458	0.134
	467			gamma-glutamylglutamate	LC/MS pos early	36738	C05282	HMDB11737	92865		0.95	0.76	0.84	0.79	0.88	1.11	1.33	0.88	1.59	0.66	1.19	1.81	0.67	0.93	0.77	1.26					0.6764	0.2618	0.5129	0.3851	0.6595	0.8871	0.2863	0.132	0.3925	0.1509	0.8298	0.8554	0.3704	0.6315	0.992	0.7897	0.3287	0.745	0.3757
	468			gamma-glutamylglutamine	LC/MS pos early	2730	C05283	HMDB11738	150914		0.42	0.65	1.29	1.58	3.11	1.98	0.92	0.46	1.32	0.5	1.44	2.85	0.84	1.86	0.59	0.86					0.0211	0.0196	0.4427	0.3619	0.7301	0.8871	0.112	0.0607	0.009	0.0083	0.2683	0.7603	0.5111	0.6502	0.0759	0.4378	0.8027	0.8149	0.2532
	469			gamma-glutamylglycine	LC/MS pos early	33949		HMDB11667	165527		0.64	0.68	1.48	1.05	2.3	2.18	2.5	1.36	2.2	0.54	0.88	1.61	0.68	2.66	1.37	1.01					0.2531	0.1306	0.5876	0.4077	0.721	0.8871	0.5435	0.2103	0.1366	0.0674	0.3702	0.7603	0.5899	0.6632	0.9047	0.7741	0.3095	0.7314	0.5106
	470			gamma-glutamylhistidine	LC/MS pos early	18245			7017195		0.64	0.48	1.41	0.75	2.21	2.94	2.59	0.61	1.19	0.24	0.46	1.96	0.9	3.63	1.13	0.76					0.4683	0.1998	0.2333	0.2756	0.7688	0.8871	0.6353	0.2343	0.3101	0.1258	0.1399	0.7378	0.5216	0.659	0.2899	0.6103	0.9764	0.8427	0.0933
	471			gamma-glutamylisoleucine*	LC/MS pos early	34456		HMDB11170	14253342		1.58	0.49	1.21	0.31	0.77	2.46	1.63	0.55	0.83	0.34	0.51	1.5	1.29	1.33	1.44	0.88					0.1011	0.0667	0.0453	0.1585	0.8694	0.9027	0.0006	0.0008	0.1383	0.0678	0.0313	0.6723	0.4545	0.6496	0.1483	0.5356	0.5009	0.7737	0.0315
	472			gamma-glutamylleucine	LC/MS pos early	18369		HMDB11171	151023		2.4	0.55	1.03	0.23	0.43	1.85	1.33	0.55	0.66	0.41	0.5	1.22	1.4	0.78	1.39	0.91					0.0126	0.0131	0.174	0.2497	0.9506	0.9027	0.0003	0.0004	0.0147	0.0126	0.1558	0.7603	0.4533	0.6496	0.3428	0.6479	0.4166	0.7458	0.0936
	473			gamma-glutamyl-alpha-lysine	LC/MS pos early	55015			65254		0.4	0.35	1.11	0.88	2.77	3.15	0.9	0.49	0.52	0.55	0.58	1.05	1.21	2.71	1.71	0.57					0.1081	0.069	0.028	0.1404	0.7723	0.8871	0.5281	0.2065	0.1839	0.0845	0.0536	0.7068	0.1812	0.5138	0.1767	0.5607	0.1871	0.6487	0.9884
	474			gamma-glutamyl-epsilon-lysine	LC/MS pos early	33934		HMDB03869	7015685		0.56	0.38	0.38	0.69	0.69	1	0.94	1.06	0.62	1.13	0.66	0.59	0.87	1.48	2.41	1.42					0.372	0.1693	0.037	0.1548	0.1911	0.8271	0.2169	0.1063	0.6717	0.223	0.4127	0.7603	0.9733	0.7479	0.9888	0.7897	0.5259	0.7737	0.9845
	475			gamma-glutamylmethionine	LC/MS pos early	44872		HMDB29155	7009567		0.61	0.89	2.13	1.45	3.48	2.39	0.99	0.25	0.7	0.25	0.71	2.79	1.9	3.06	0.54	0.62					0.2721	0.1364	0.7526	0.458	0.29	0.8454	0.1602	0.0828	0.0347	0.023	0.4548	0.7775	0.713	0.6877	0.0504	0.3894	0.5635	0.7773	0.1074
	476			gamma-glutamylphenylalanine	LC/MS pos early	33422		HMDB00594	111299		0.83	0.49	0.86	0.59	1.04	1.75	1.05	0.48	0.66	0.46	0.62	1.35	1.31	1.66	1.29	0.99					0.9306	0.3255	0.2164	0.2676	0.7055	0.8871	0.1866	0.094	0.6422	0.2174	0.3866	0.7603	0.7674	0.6975	0.1305	0.5032	0.2686	0.7007	0.2199
	477			gamma-glutamylthreonine	LC/MS pos early	33364		HMDB29159	76078708		0.83	0.68	1.17	0.82	1.41	1.72	2.54	0.82	1.17	0.32	0.46	1.41	0.82	2.51	0.99	0.82					0.773	0.2876	0.2806	0.292	0.9344	0.9027	0.4265	0.1797	0.8366	0.2673	0.3181	0.7603	0.188	0.5192	0.7846	0.7467	0.8114	0.8152	0.1143
	478			gamma-glutamyltryptophan	LC/MS pos early	33947		HMDB29160	3989307		0.51	0.68	1.03	1.34	2.03	1.52	1.25	0.6	0.83	0.48	0.66	1.38	1.16	2.84	1.03	0.93					0.0253	0.0222	0.3282	0.3137	0.6417	0.8871	0.1895	0.0949	0.0709	0.0394	0.6053	0.8385	0.7698	0.6975	0.4277	0.6652	0.7389	0.805	0.2797
	479			gamma-glutamyltyrosine	LC/MS neg	2734		HMDB11741	94340		0.4	0.43	1.1	1.08	2.74	2.55	1.33	0.23	0.35	0.18	0.26	1.49	2.22	7.38	1.2	0.7					0.0962	0.0646	0.1274	0.2269	0.7498	0.8871	0.8838	0.2935	0.1744	0.0821	0.2238	0.7603	0.4337	0.6455	0.0151	0.2763	0.0671	0.43	0.0879
	480			gamma-glutamylvaline	LC/MS pos early	43829		HMDB11172	7015683		1.56	0.52	1.12	0.33	0.72	2.14	1.77	0.52	0.87	0.29	0.49	1.68	1.2	1.36	1.19	0.93					0.118	0.0734	0.0643	0.1714	0.9134	0.9027	0.0012	0.0014	0.0956	0.0512	0.0805	0.7205	0.2893	0.5771	0.0714	0.4299	0.5357	0.7749	0.0056
	481			gamma-glutamylserine	LC/MS pos early	54914					0.54	0.53	1.15	0.99	2.12	2.14	1.32	0.53	1.17	0.4	0.89	2.23	0.94	2.3	0.93	0.96					0.0252	0.0222	0.3289	0.3137	0.9795	0.9106	0.1889	0.0949	0.0268	0.0191	0.3416	0.7603	0.9426	0.7443	0.2779	0.6103	0.8609	0.8189	0.3104
	630		Dipeptide	glycylisoleucine	LC/MS pos early	36659		HMDB28844	88079		4.78	0.59	0.46	0.12	0.1	0.79	1.56	1.5	0.2	0.96	0.13	0.13	1.57	0.51	4.02	0.67					0.0008	0.0019	0.5851	0.4077	0.4911	0.8649	0.0002	0.0003	9.8684e-05	0.0003	0.8858	0.8554	0.3432	0.6297	0.6627	0.7054	0.065	0.4283	0.6061
	631			glycylleucine	LC/MS pos early	34398	C02155	HMDB00759	92843		1.85	0.53	0.61	0.28	0.33	1.15	0.85	1.24	0.34	1.46	0.4	0.27	1.97	0.91	4.64	1.1					0.0751	0.0532	0.143	0.2388	0.3341	0.8454	0.0019	0.002	0.0077	0.0074	0.6083	0.8401	0.934	0.7402	0.9784	0.7888	0.0381	0.3344	0.9555
	641			glycylvaline	LC/MS pos early	18357		HMDB28854	97417		2.02	0.5	0.53	0.25	0.26	1.06	0.89	0.95	0.28	1.07	0.32	0.3	1.9	0.83	3.58	1					0.0432	0.0332	0.1064	0.2084	0.2067	0.8337	0.0006	0.0008	0.0017	0.0023	0.7147	0.851	0.8792	0.7268	0.7177	0.7212	0.0172	0.2223	0.608
	646			histidylalanine	LC/MS pos early	42027		HMDB28878	351667		0.74	0.78	0.72	1.04	0.96	0.92	0.83	0.75	0.23	0.89	0.28	0.31	1.99	2.23	1.91	0.65					0.7878	0.2909	0.512	0.3851	0.7947	0.8927	0.6981	0.2493	0.9929	0.2997	0.6915	0.8461	0.4142	0.6315	0.5168	0.6828	0.0101	0.1706	0.865
	665			isoleucylglycine	LC/MS neg	40008		HMDB28907	342532		1.08	0.63	0.74	0.58	0.68	1.17	0.86	1.52	0.4	1.78	0.46	0.26	2.36	1.88	5.69	1.28					0.7042	0.2693	0.265	0.2903	0.2438	0.8454	0.4589	0.1898	0.4281	0.1603	0.9583	0.8741	0.8626	0.7201	0.8215	0.7571	0.0833	0.4637	0.6903
	684			leucylglycine	LC/MS pos early	40045		HMDB28929	79070		1.09	0.89	0.95	0.82	0.88	1.07	0.86	1.1	0.48	1.29	0.56	0.43	1.83	1.44	2.26	0.92					0.4824	0.2045	0.988	0.5249	0.9337	0.9027	0.4732	0.193	0.4326	0.1613	0.9456	0.8683	0.4803	0.6496	0.8398	0.7598	0.2629	0.7007	0.6135
	733			phenylalanylalanine	LC/MS neg	41374			5488196		0.99	0.6	0.53	0.61	0.54	0.88	0.68	1.13	0.35	1.66	0.52	0.31	1.91	1.31	3.59	1.26					0.4292	0.1869	0.1349	0.2332	0.1356	0.7317	0.4713	0.1927	0.4732	0.1722	0.9976	0.8797	0.3172	0.601	0.8472	0.7598	0.0447	0.359	0.2346
	737			phenylalanylglycine	LC/MS pos early	41370		HMDB28995	98207		1.01	0.44	0.65	0.43	0.64	1.49	0.74	1.1	0.31	1.49	0.42	0.28	2.37	1.73	5.98	1.12					0.5527	0.2244	0.1046	0.2077	0.4294	0.8649	0.2947	0.1352	0.8428	0.2687	0.3937	0.7603	0.5259	0.659	0.8958	0.774	0.0594	0.419	0.4449
	756			prolylglycine	LC/MS pos early	40703		HMDB11178	6426709		1.5	0.51	0.49	0.34	0.33	0.96	1.2	1.59	0.55	1.33	0.46	0.35	1.43	1.14	4.46	1.59					0.1077	0.0689	0.1929	0.2576	0.1263	0.6884	0.005	0.0047	0.0026	0.0033	0.8138	0.8554	0.4896	0.6496	0.3966	0.6652	0.1227	0.5287	0.874
	794			threonylphenylalanine	LC/MS neg	31530		HMDB29068	4099799		1.11	1.15	0.79	1.04	0.71	0.69	0.59	0.91	0.13	1.53	0.21	0.14	3	1.61	2.37	0.48					0.9856	0.3379	0.5603	0.3989	0.6199	0.8871	0.5724	0.2177	0.6326	0.216	0.9307	0.8666	0.3363	0.6231	0.7807	0.7462	0.0045	0.1037	0.2173
	804			tryptophylglycine	LC/MS pos early	43028		HMDB29083	263471		1.26	0.71	0.94	0.57	0.74	1.31	0.79	0.92	0.29	1.17	0.37	0.32	2.57	1.61	3.31	0.81					0.6991	0.269	0.4769	0.3726	0.8446	0.8989	0.2748	0.1284	0.5608	0.1969	0.6055	0.8385	0.8696	0.7231	0.6673	0.7054	0.0162	0.2223	0.553
	820			tyrosylglycine	LC/MS neg	41375		HMDB29105	259323		0.82	0.45	0.62	0.55	0.76	1.36	0.8	1.2	0.54	1.49	0.67	0.45	1.8	1.77	4.75	1.58					0.0396	0.0315	0.0495	0.1605	0.2661	0.8454	0.9193	0.3025	0.3235	0.13	0.3747	0.7603	0.6297	0.6738	0.6706	0.7054	0.4174	0.7458	0.366
	836			valylglutamine	LC/MS pos early	42079		HMDB29125	5253209		1.44	0.44	0.41	0.31	0.29	0.93	1.79	2.6	0.38	1.46	0.21	0.15	1.19	1.48	6.96	1.09					0.1474	0.086	0.3477	0.3242	0.1195	0.6884	0.0198	0.0142	0.0039	0.0044	0.5255	0.8193	0.1959	0.5315	0.3989	0.6652	0.079	0.4567	0.6462
	837			valylglycine	LC/MS pos early	40475		HMDB29127	136487		1.42	0.39	0.56	0.27	0.39	1.45	1.5	3.05	0.38	2.03	0.25	0.12	1.56	1.65	12.38	1.07					0.2882	0.1419	0.2753	0.2907	0.3537	0.8497	0.035	0.0237	0.0507	0.0306	0.8676	0.8554	0.0817	0.4369	0.096	0.4794	0.2935	0.7286	0.936
	840			valylleucine	LC/MS pos early	39994		HMDB29131	352039		0.83	0.6	0.59	0.72	0.71	0.99	0.75	1.22	0.21	1.63	0.29	0.18	1.87	1.68	3.82	0.68					0.9665	0.3332	0.1907	0.2562	0.2942	0.8454	0.2048	0.1009	0.3135	0.1265	0.7899	0.8554	0.8384	0.716	0.7024	0.719	0.0091	0.1596	0.5584
	929		Acetylated Peptides	phenylacetylglycine	LC/MS pos early	33945	C05598	HMDB00821	68144		1.18	0.49	0.78	0.41	0.67	1.61	0.76	0.64	0.45	0.84	0.59	0.7	1.53	0.99	2.01	0.87					0.4016	0.1781	0.1757	0.2509	0.6945	0.8871	0.0317	0.0216	0.2209	0.0961	0.3315	0.7603	0.1136	0.4657	0.197	0.563	0.0473	0.3697	0.7613
	955	Carbohydrate	Glycolysis, Gluconeogenesis, and Pyruvate Metabolism	1,5-anhydroglucitol (1,5-AG)	LC/MS neg	20675	C07326	HMDB02712	64960		0.99	0.89	1.08	0.9	1.09	1.21	0.9	1.12	0.99	1.25	1.1	0.88	1.02	0.93	1.28	0.93					0.7689	0.2867	0.7905	0.463	0.6694	0.8871	0.5764	0.2183	0.8939	0.2793	0.4895	0.8041	0.3827	0.6315	0.5936	0.6982	0.9234	0.826	0.1632
	958			glucose	LC/MS polar	48152	C00031	HMDB00122	79025		14.06	0.81	1.24	0.06	0.09	1.53	4.1	0.48	1.61	0.12	0.39	3.34	0.83	0.24	0.49	1.07					0.0016	0.0032	0.6773	0.4411	0.8262	0.8989	0.0005	0.0007	0.003	0.0036	0.5257	0.8193	0.1739	0.5138	0.2378	0.5835	0.3157	0.7346	0.0136
	959			glucose 6-phosphate	LC/MS polar	31260	C00668	HMDB01401	5958		12.17	0.59	0.32	0.05	0.03	0.54	0.72	0.43	0.43	0.6	0.6	1	2.71	0.16	1.98	3.65					0.0004	0.0011	0.1869	0.2534	0.26	0.8454	5.5678e-06	4.662e-05	1.0566e-05	8.9735e-05	0.8423	0.8554	0.6798	0.6741	0.2436	0.5881	0.1777	0.6415	0.4472
	962			fructose-6-phosphate	LC/MS polar	12021	C05345	HMDB00124	69507		8.71	0.46	0.35	0.05	0.04	0.76	1.28	0.6	0.76	0.47	0.59	1.25	1.53	0.23	2	3.31					0.0006	0.0015	0.2703	0.2903	0.2811	0.8454	1.8176e-05	8.7362e-05	1.9686e-05	9.8181e-05	0.98	0.8797	0.6487	0.6738	0.6077	0.7037	0.7059	0.798	0.3347
	965			fructose 1,6-diphosphate/glucose 1,6-diphosphate/myo-inositol diphosphates	LC/MS neg	46896	C00354				0.65	0.6	0.43	0.92	0.65	0.71	0.72	0.88	0.94	1.23	1.31	1.07	1.12	1.24	1.66	2.49					0.0662	0.0479	0.194	0.2576	0.0776	0.6384	0.5734	0.2177	0.9387	0.2894	0.6266	0.8461	0.2605	0.5615	0.8678	0.7618	0.6756	0.798	0.336
	967			dihydroxyacetone phosphate (DHAP)	LC/MS pos early	15522	C00111	HMDB01473	668		1.31	0.5	0.68	0.39	0.52	1.35	0.96	0.89	0.94	0.92	0.97	1.05	1.06	0.78	1.86	1.45					0.2711	0.1363	0.0133	0.1058	0.3141	0.8454	0.0006	0.0009	0.0389	0.025	0.1239	0.7378	0.8231	0.7093	0.9271	0.7741	0.8999	0.8237	0.7528
	971			2-phosphoglycerate	LC/MS polar	35629	C00631	HMDB03391	59		0.9	0.73	0.36	0.81	0.41	0.5	0.86	0.66	0.61	0.76	0.71	0.93	0.65	0.62	0.59	1.09					0.5349	0.2192	0.6454	0.4344	0.2195	0.8421	0.2824	0.1312	0.0684	0.0386	0.4379	0.7742	0.7871	0.705	0.8351	0.7598	0.8592	0.8189	0.6328
	972			3-phosphoglycerate	LC/MS neg	1414	C00597	HMDB00807	724		0.71	0.88	0.75	1.25	1.06	0.85	0.75	1	1.31	1.33	1.74	1.31	0.61	0.65	0.69	1.06					0.4667	0.1996	0.6327	0.429	0.1852	0.8271	0.8015	0.2785	0.5432	0.1924	0.3915	0.7603	0.5859	0.6632	0.4837	0.6828	0.4637	0.7737	0.8754
	973			phosphoenolpyruvate (PEP)	LC/MS neg	597	C00074	HMDB00263	1005		0.73	0.76	0.53	1.05	0.73	0.7	0.67	0.85	1.85	1.26	2.76	2.19	0.5	0.46	0.56	1.75					0.78	0.2897	0.5013	0.3809	0.1229	0.6884	0.6932	0.2485	0.2027	0.0903	0.3747	0.7603	0.4657	0.6496	0.3668	0.659	0.1515	0.5937	0.861
	974			pyruvate	LC/MS polar	48990	C00022	HMDB00243	1060		1.2	0.72	0.75	0.6	0.62	1.04	1.26	1.08	1.67	0.86	1.33	1.55	0.58	0.61	0.87	1.3					0.2625	0.1344	0.4076	0.3523	0.5852	0.8871	0.0554	0.0341	0.0994	0.0524	0.7758	0.8554	0.4128	0.6315	0.7669	0.7406	0.11	0.4942	0.5996
	975			lactate	LC/MS polar	527	C00186	HMDB00190	612		1.32	0.77	0.75	0.58	0.56	0.97	0.96	1.03	0.87	1.08	0.9	0.84	1.16	0.85	1.57	1.35					0.1282	0.0774	0.2837	0.2921	0.3442	0.8454	0.0118	0.0094	0.0162	0.0135	0.8977	0.8611	0.93	0.7402	0.9058	0.7741	0.5271	0.7737	0.8367
	978			glycerate	LC/MS polar	1572	C00258	HMDB00139	752		0.53	0.65	0.86	1.21	1.6	1.32	0.62	0.64	0.72	1.02	1.17	1.14	0.9	1.05	0.88	0.76					0.1007	0.0667	0.1554	0.2439	0.7158	0.8871	0.8177	0.2819	0.1965	0.0882	0.2859	0.7603	0.3173	0.601	0.2533	0.5953	0.5661	0.7773	0.8843
	981		Pentose Phosphate Pathway	6-phosphogluconate	LC/MS neg	15442	C00345	HMDB01316	91493		1.98	0.64	0.64	0.32	0.33	1	0.77	0.61	0.95	0.78	1.23	1.57	1.42	0.56	1.34	2.11					0.0587	0.0432	0.1833	0.2515	0.3385	0.8454	0.002	0.0021	0.0058	0.006	0.702	0.8461	0.9068	0.7338	0.5683	0.6897	0.8506	0.8189	0.6497
	984			ribose 1-phosphate	LC/MS polar	1763	C00620	HMDB01489	439236		6.25	1.26	1.16	0.2	0.19	0.93	1.1	1.01	0.95	0.92	0.86	0.93	1.58	0.28	1.27	1.28					0.0004	0.0011	0.6728	0.4401	0.9669	0.9087	0.0013	0.0015	0.0004	0.0009	0.7033	0.8461	0.5974	0.6636	0.8187	0.7571	0.8227	0.8152	0.7645
	985			5-phosphoribosyl diphosphate (PRPP)	LC/MS neg	36840	C00119	HMDB00280	7339		1.18	1.33	0.81	1.13	0.69	0.61	0.66	0.82	0.56	1.24	0.85	0.69	1.42	0.79	0.87	0.98					0.3134	0.15	0.2859	0.2925	0.6844	0.8871	0.952	0.3099	0.1604	0.077	0.1438	0.7406	0.7148	0.6877	0.9722	0.7873	0.4095	0.7458	0.7409
	986			sedoheptulose-7-phosphate	LC/MS neg	35649	C05382	HMDB01068	616		3.4	0.74	0.69	0.22	0.2	0.93	0.84	0.66	0.77	0.79	0.91	1.16	1.42	0.35	1.26	1.58					0.001	0.0022	0.2846	0.2921	0.3296	0.8454	3.628e-05	0.0001	4.9274e-05	0.0002	0.9227	0.8666	0.6534	0.6738	0.3004	0.6207	0.4452	0.7648	0.5541
	992		Pentose Metabolism	ribose	LC/MS polar	1471	C00121	HMDB00283	5779		2.65	0.55	1.2	0.21	0.45	2.17	1.14	0.72	0.71	0.63	0.62	0.99	0.98	0.42	1.28	0.58					0.0282	0.0245	0.3793	0.3357	0.8981	0.9027	0.003	0.003	0.0379	0.0245	0.3149	0.7603	0.9744	0.7479	0.6669	0.7054	0.702	0.798	0.6903
	993			ribitol	LC/MS polar	15772	C00474	HMDB00508	6912		3.49	0.35	0.69	0.1	0.2	1.98	2.1	1.2	1.2	0.57	0.57	1	0.9	0.54	3.14	1.58					0.0045	0.0062	0.0266	0.1379	0.2146	0.8337	4.3395e-06	4.6029e-05	0.0001	0.0003	0.304	0.7603	0.1252	0.4772	0.8604	0.7598	0.7329	0.8006	0.1724
	994			ribonate	LC/MS polar	27731	C01685	HMDB00867	5460677		3.52	0.86	0.94	0.24	0.27	1.09	1.29	0.95	0.74	0.74	0.58	0.78	1.1	0.4	1.21	0.87					0.0012	0.0027	0.6597	0.4378	0.7555	0.8871	0.0003	0.0005	0.0005	0.0009	0.8972	0.8611	0.6198	0.6716	0.7537	0.7358	0.2142	0.6643	0.4193
	1015			arabitol/xylitol	LC/MS polar	48885	C01904		6912		2.39	0.6	0.97	0.25	0.41	1.63	1.91	1.28	1.41	0.67	0.73	1.1	0.82	0.65	1.75	1.18					0.0076	0.0094	0.2136	0.2673	0.7999	0.8927	0.0002	0.0004	0.0038	0.0044	0.3191	0.7603	0.1239	0.4772	0.5321	0.6828	0.4044	0.7458	0.3521
	1016			ribulose/xylulose	LC/MS polar	48340			5289590		1.06	0.24	0.5	0.22	0.47	2.15	0.61	0.56	0.44	0.91	0.72	0.79	0.88	0.51	2.1	0.78					0.5078	0.211	0.0224	0.1342	0.261	0.8454	0.0041	0.004	0.078	0.0426	0.2238	0.7603	0.3525	0.6315	0.5155	0.6828	0.2524	0.7007	0.7774
	1017			arabonate/xylonate	LC/MS polar	48255					7.12	0.72	0.77	0.1	0.11	1.07	3.4	1.4	0.96	0.41	0.28	0.69	0.74	0.35	1.44	0.93					6.9442e-05	0.0004	0.5583	0.3987	0.6191	0.8871	1.0799e-05	7.7893e-05	1.4355e-05	9.1556e-05	0.9292	0.8666	0.0514	0.347	0.7811	0.7462	0.8315	0.8184	0.0917
	1018			sedoheptulose	LC/MS polar	53237		HMDB03219	5459879		8.21	0.38	0.9	0.05	0.11	2.37	1.15	0.54	0.68	0.47	0.59	1.25	1.03	0.14	1.46	0.77					0.0007	0.0017	0.2781	0.2915	0.9767	0.9106	2.3827e-05	9.7646e-05	0.0007	0.0012	0.2656	0.7603	0.9615	0.7458	0.3954	0.6652	0.6558	0.798	0.4225
	1019			ribulonate/xylulonate*	LC/MS polar	61858					29.23	0.81	0.81	0.03	0.03	1	7.2	1.09	1	0.15	0.14	0.92	1.1	0.27	1.47	1.35					6.9059e-06	0.0001	0.8104	0.4694	0.6573	0.8871	3.1798e-06	4.4105e-05	1.6385e-06	3.5255e-05	0.8382	0.8554	0.1749	0.5138	0.9907	0.7897	0.8583	0.8189	0.1714
	1022		Glycogen Metabolism	maltopentaose	LC/MS neg	35163	C06218	HMDB12254	13489094		32.1	0.11	0.29	0	0.01	2.59	0.69	0.2	0.27	0.29	0.39	1.37	1.06	0.02	1.83	0.97					0.0101	0.0116	0.0065	0.0796	0.0785	0.6384	1.874e-06	3.7546e-05	5.6326e-05	0.0002	0.2918	0.7603	0.9335	0.7402	0.3411	0.6476	0.7215	0.8003	0.3012
	1023			maltotetraose	LC/MS neg	15910	C02052	HMDB01296	446495		54.73	0.39	0.21	0.01	0	0.55	0.84	0.19	0.19	0.23	0.22	0.98	1.79	0.03	0.89	1.58					0.0003	0.001	0.1032	0.2077	0.1137	0.6884	1.4134e-06	3.2197e-05	1.6626e-06	3.5255e-05	0.9602	0.8741	0.7044	0.6877	0.0973	0.4802	0.1482	0.5937	0.1957
	1025			maltotriose	LC/MS polar	44688	C01835	HMDB01262	439586		16.28	0.35	0.48	0.02	0.03	1.38	0.67	0.15	0.34	0.22	0.5	2.21	1.7	0.07	0.75	1.2					0.0043	0.006	0.2882	0.2928	0.3602	0.8517	0.0002	0.0003	0.0003	0.0007	0.8808	0.8554	0.312	0.5963	0.0479	0.3894	0.5228	0.7737	0.3153
	1028			maltose	LC/MS polar	15586	C00208	HMDB00163	10991489		9.41	0.28	0.58	0.03	0.06	2.07	0.85	0.16	0.37	0.19	0.44	2.34	1.44	0.13	0.8	0.91					0.0264	0.0232	0.0378	0.1548	0.2702	0.8454	6.6308e-05	0.0002	0.0014	0.002	0.3092	0.7603	0.6388	0.6738	0.038	0.3673	0.5738	0.7773	0.1022
	1050		Disaccharides and Oligosaccharides	sucrose	LC/MS polar	1519	C00089	HMDB00258	5988		1.16	1.75	3.6	1.51	3.1	2.05	0.49	0.16	0.41	0.33	0.83	2.56	1.53	0.65	0.14	0.17					0.5574	0.2253	0.4458	0.362	0.0887	0.6574	0.8593	0.2885	0.2556	0.1068	0.3355	0.7603	0.4002	0.6315	0.0022	0.1386	0.2508	0.7007	0.0199
	1068		Fructose, Mannose and Galactose Metabolism	fructose	LC/MS polar	48195	C00095	HMDB00660	5984		3.76	0.32	1.12	0.08	0.3	3.53	0.74	0.47	0.66	0.64	0.9	1.42	0.8	0.16	1.18	0.47					0.0118	0.0125	0.0626	0.1714	0.9418	0.9027	4.8341e-05	0.0001	0.0098	0.0089	0.0729	0.7068	0.6028	0.6636	0.1578	0.5607	0.3599	0.7458	0.3658
	1073			mannitol/sorbitol	LC/MS polar	46142	C00794	HMDB00247	5780		4.01	0.5	0.81	0.12	0.2	1.63	2.51	1.34	1.65	0.53	0.66	1.24	1.07	0.67	2.87	2.18					0.0038	0.0057	0.0856	0.1932	0.4069	0.8649	2.0217e-05	8.8799e-05	0.0004	0.0008	0.3608	0.7603	0.053	0.347	0.4654	0.68	0.2934	0.7286	0.2161
	1074			mannose	LC/MS polar	48153	C00159	HMDB00169	18950		20.55	0.53	0.74	0.03	0.04	1.4	2.86	0.64	0.92	0.22	0.32	1.44	1.19	0.17	1.42	1.47					6.5261e-05	0.0004	0.325	0.3133	0.6524	0.8871	2.752e-06	4.1353e-05	1.5652e-05	9.1556e-05	0.5903	0.8385	0.2754	0.573	0.5558	0.6897	0.9346	0.8311	0.0969
	1075			mannose-6-phosphate	LC/MS polar	1469	C00275	HMDB01078	439198		3.21	0.61	0.32	0.19	0.1	0.52	0.6	0.46	0.45	0.76	0.75	0.99	2.31	0.43	1.74	3.29					0.0072	0.009	0.1049	0.2077	0.0637	0.6124	5.8931e-05	0.0001	2.7079e-05	0.0001	0.8055	0.8554	0.4068	0.6315	0.1829	0.5607	0.087	0.4637	0.6082
	1084			galactitol (dulcitol)	LC/MS polar	1117	C01697	HMDB00107	11850		1.12	0.58	0.91	0.52	0.81	1.56	1.32	0.89	1.07	0.67	0.81	1.2	1.2	1.41	1.83	1.41					0.438	0.1899	0.1708	0.2463	0.6142	0.8871	0.0353	0.0238	0.204	0.0906	0.3805	0.7603	0.716	0.6877	0.5676	0.6897	0.9696	0.8426	0.3515
	1085			galactose 1-phosphate	LC/MS polar	15706	C00446	HMDB00645	123912		3.19	0.51	0.45	0.16	0.14	0.89	1.19	1.24	0.88	1.04	0.74	0.71	1.02	0.38	2.48	1.99					0.0016	0.0032	0.0635	0.1714	0.14	0.7336	4.6076e-06	4.6158e-05	1.67e-05	9.443e-05	0.6891	0.8461	0.6092	0.6649	0.5069	0.6828	0.7505	0.8056	0.8781
	1094			galactonate	LC/MS polar	27719	C00880	HMDB00565	128869		1.29	0.26	0.67	0.2	0.52	2.54	0.8	1.33	1.37	1.65	1.7	1.03	0.76	0.47	3.82	1.54					0.3062	0.1481	0.0891	0.1938	0.6096	0.8871	0.0083	0.0072	0.1287	0.0642	0.2266	0.7603	0.9606	0.7458	0.5784	0.6936	0.8528	0.8189	0.6124
	1099		Nucleotide Sugar	UDP-glucose	LC/MS polar	32344	C00029	HMDB00286	8629		4.65	2.83	3.28	0.61	0.7	1.16	1.09	0.74	1.11	0.67	1.01	1.51	2.71	0.64	0.7	0.92					0.0215	0.0199	0.119	0.2199	0.1417	0.7336	0.4288	0.1797	0.3771	0.1457	0.9258	0.8666	0.4884	0.6496	0.4945	0.6828	0.9954	0.8436	0.1726
	1103			UDP-galactose	LC/MS polar	15860	C00052	HMDB00302	18068		3.79	1.66	1.6	0.44	0.42	0.97	2.3	1.56	1.26	0.68	0.55	0.81	1.6	0.97	1.51	1.26					0.0069	0.0087	0.359	0.3291	0.6194	0.8871	0.0618	0.0373	0.0238	0.0178	0.6714	0.8461	0.0533	0.347	0.3961	0.6652	0.7973	0.8134	0.2638
	1104			UDP-glucuronate	LC/MS neg	2763	C00167	HMDB00935	17473		1.71	2.6	2.22	1.52	1.29	0.85	1.23	1.56	1.18	1.27	0.96	0.76	2.22	1.6	1.33	1.18					0.2679	0.1352	0.1649	0.244	0.4804	0.8649	0.7725	0.2694	0.683	0.2256	0.4865	0.8018	0.3259	0.6095	0.4395	0.6652	0.7469	0.8056	0.8318
	1106			guanosine 5'-diphospho-fucose	LC/MS neg	15903					6.37	2.81	3.25	0.44	0.51	1.15	5.24	1.1	1.86	0.21	0.36	1.7	1.25	1.03	0.49	0.72					9.0495e-05	0.0005	0.051	0.1605	0.0276	0.4924	0.0243	0.017	0.0453	0.0279	0.7849	0.8554	0.0008	0.0862	0.7754	0.744	0.2674	0.7007	0.0019
	1110			UDP-N-acetylglucosamine/galactosamine	LC/MS polar	46148					3.61	1.22	1.49	0.34	0.41	1.22	1.86	1.21	0.87	0.65	0.47	0.72	1.76	0.91	1.75	1.03					0.0059	0.0078	0.6504	0.436	0.6498	0.8871	0.0187	0.0136	0.0187	0.015	0.9994	0.8797	0.1842	0.5149	0.7223	0.7212	0.8377	0.8189	0.3265
	1111			cytidine 5'-monophospho-N-acetylneuraminic acid	LC/MS polar	36831	C00128	HMDB01176	448209		0.85	0.75	1.09	0.88	1.28	1.46	1.35	1.15	1.02	0.85	0.76	0.89	1.19	1.89	1.83	1.12					0.9884	0.3383	0.6299	0.4281	0.7554	0.8871	0.6197	0.2304	0.7445	0.241	0.8643	0.8554	0.4961	0.6496	0.7425	0.7313	0.8772	0.8189	0.7237
	1122		Aminosugar Metabolism	glucuronate	LC/MS polar	15443	C00191	HMDB00127	444791		1.9	0.56	1.23	0.3	0.65	2.19	0.93	0.89	0.93	0.96	1	1.04	1.13	0.55	1.78	0.85					0.0909	0.0623	0.0804	0.1886	0.8403	0.8989	0.0011	0.0013	0.06	0.0345	0.1195	0.7378	0.8514	0.7184	0.9564	0.7866	0.9513	0.8362	0.8088
	1126			N-acetylglucosamine 6-phosphate	LC/MS polar	15107	C00357	HMDB02817	439219		0.81	0.5	0.74	0.62	0.91	1.48	1.01	1.15	1.28	1.14	1.27	1.11	1.04	1.3	2.4	1.8					0.8304	0.302	0.0578	0.1714	0.3714	0.8621	0.0899	0.0508	0.4952	0.1787	0.3003	0.7603	0.8734	0.7248	0.5808	0.6936	0.2732	0.7019	0.6939
	1127			N-acetyl-glucosamine 1-phosphate	LC/MS polar	15741	C04256	HMDB01367	440364		1.3	0.65	1.07	0.5	0.82	1.65	1.25	2.18	1.18	1.74	0.94	0.54	1.01	0.97	3.4	1.12					0.2149	0.1137	0.7265	0.4541	0.5063	0.8687	0.1147	0.0619	0.5588	0.1967	0.3125	0.7603	0.4486	0.6496	0.0501	0.3894	0.4896	0.7737	0.2169
	1133			N-acetylneuraminate	LC/MS polar	32377	C00270	HMDB00230	439197		1.34	0.68	1.05	0.51	0.79	1.56	1.34	0.77	1.01	0.58	0.76	1.31	1.59	1.59	1.82	1.53					0.2294	0.1207	0.3679	0.3296	0.8227	0.8989	0.0393	0.0255	0.156	0.0752	0.4971	0.8112	0.6044	0.6636	0.4394	0.6652	0.7975	0.8134	0.2
	1144			N-acetylglucosaminylasparagine	LC/MS pos early	48149	C04540	HMDB00489	123826		1.61	0.75	0.85	0.46	0.53	1.14	1.67	1.17	1.26	0.7	0.76	1.08	1.07	1.11	1.68	1.59					0.0531	0.0397	0.4574	0.3676	0.7531	0.8871	0.0091	0.0078	0.0261	0.0187	0.6669	0.8461	0.1567	0.5061	0.5857	0.6959	0.6764	0.798	0.3767
	1145			erythronate*	LC/MS polar	42420		HMDB00613	2781043		1.12	0.52	0.61	0.47	0.55	1.17	0.85	0.88	0.73	1.04	0.86	0.83	1.3	0.98	2.18	1.55					0.3323	0.156	0.039	0.1556	0.122	0.6884	0.0034	0.0033	0.0143	0.0123	0.5821	0.8385	0.7384	0.6931	0.6829	0.7066	0.3518	0.745	0.9405
	1147			N-acetylglucosamine/N-acetylgalactosamine	LC/MS pos early	46539		HMDB00215	24139		1.11	0.46	0.61	0.41	0.55	1.34	0.94	1.09	0.82	1.17	0.87	0.75	1	0.84	2.38	1.33					0.3983	0.1774	0.0897	0.1938	0.2816	0.8454	0.0132	0.0101	0.0588	0.0341	0.5209	0.8193	0.1732	0.5138	0.7226	0.7212	0.742	0.805	0.0888
	1148		Advanced Glycation End-product	N6-carboxymethyllysine	LC/MS pos early	36713			123800		1.37	1.85	1.43	1.35	1.04	0.77	1.22	0.9	0.5	0.73	0.41	0.55	1.58	1.41	0.77	0.55					0.2118	0.1127	0.1173	0.2183	0.2316	0.8454	0.7418	0.2616	0.9571	0.2925	0.7016	0.8461	0.4031	0.6315	0.7897	0.7467	0.2243	0.6744	0.2721
	1152	Energy	TCA Cycle	citrate	LC/MS neg	1564	C00158	HMDB00094	311		0.93	1.16	1.82	1.25	1.96	1.57	1.27	0.75	1.36	0.59	1.07	1.81	0.99	1.35	0.64	0.74					0.7127	0.271	0.8383	0.4785	0.0418	0.5877	0.5677	0.217	0.0177	0.0144	0.0649	0.7068	0.4871	0.6496	0.1903	0.5607	0.2619	0.7007	0.0487
	1154			aconitate [cis or trans]	LC/MS neg	46173					1.02	1.03	1.88	1.01	1.85	1.82	1.06	0.7	1.12	0.66	1.05	1.6	1.08	1.13	0.73	0.64					0.889	0.3155	0.9868	0.5249	0.0133	0.4758	0.8759	0.2918	0.0188	0.015	0.0128	0.527	0.9281	0.7402	0.0775	0.4403	0.6698	0.798	0.0643
	1158			alpha-ketoglutarate	LC/MS polar	528	C00026	HMDB00208	51		1.07	1.13	1.22	1.06	1.15	1.08	1.21	1.27	1.8	1.05	1.49	1.41	0.78	0.88	0.87	1.14					0.8628	0.3079	0.5132	0.3851	0.2617	0.8454	0.6298	0.2327	0.3405	0.1347	0.6347	0.8461	0.2125	0.5472	0.1347	0.5072	0.0007	0.0403	0.7965
	1160			succinylcarnitine (C4-DC)	LC/MS pos early	37058		HMDB61717	71464481		11.49	0.87	1.38	0.08	0.12	1.58	4.62	0.88	3.38	0.19	0.73	3.85	0.85	0.34	0.85	2.08					0.0001	0.0006	0.9096	0.5036	0.52	0.8729	0.0002	0.0003	0.0009	0.0014	0.5958	0.8385	0.2155	0.5472	0.8095	0.7543	0.3262	0.745	0.1412
	1161			succinate	LC/MS polar	1437	C00042	HMDB00254	1110		11.43	1.15	1.56	0.1	0.14	1.36	2.93	1.18	1.01	0.4	0.35	0.86	1.23	0.31	1.25	0.79					0.0005	0.0015	0.36	0.3291	0.2284	0.8454	0.0072	0.0064	0.0152	0.0128	0.7679	0.8554	0.0479	0.347	0.4785	0.6828	0.9647	0.8408	0.1924
	1162			fumarate	LC/MS polar	1643	C00122	HMDB00134	444972		1.45	0.74	0.46	0.51	0.32	0.62	1.65	0.92	0.89	0.56	0.54	0.97	0.65	0.73	0.8	1.25					0.4396	0.1901	0.6987	0.4498	0.1933	0.8271	0.2487	0.119	0.0417	0.0263	0.3562	0.7603	0.1321	0.4877	0.7511	0.7358	0.7954	0.8134	0.0707
	1163			malate	LC/MS polar	1303	C00149	HMDB00156	525		1.74	0.85	0.72	0.49	0.42	0.85	1.54	1.14	1.11	0.74	0.72	0.97	0.99	0.88	1.33	1.52					0.0197	0.0185	0.4401	0.3619	0.2105	0.8337	0.0026	0.0027	0.0006	0.0011	0.6248	0.8461	0.1307	0.4877	0.6363	0.7037	0.8212	0.8152	0.2926
	1167			itaconate	LC/MS polar	18373	C00490	HMDB02092	811		0.63	0.5	0.76	0.78	1.2	1.53	1.23	0.54	0.83	0.44	0.67	1.54	1.75	3.41	1.9	1.91					0.2901	0.1421	0.7088	0.4515	0.5457	0.8867	0.4904	0.197	0.6461	0.2183	0.8167	0.8554	0.7636	0.6975	0.0483	0.3894	0.6665	0.798	0.0906
	1173			2-methylcitrate/homocitrate	LC/MS neg	52282					4.54	0.77	1.01	0.17	0.22	1.32	2.14	1.15	0.94	0.54	0.44	0.81	1.07	0.5	1.61	0.99					6.5488e-05	0.0004	0.5025	0.3809	0.6163	0.8871	7.7186e-06	6.0513e-05	0.0003	0.0007	0.2443	0.7603	0.1738	0.5138	0.6296	0.7037	0.8827	0.8189	0.3741
	1177		Oxidative Phosphorylation	phosphate	LC/MS neg	42109	C00009	HMDB01429	1061		1.35	0.92	0.92	0.68	0.69	1.01	1.16	1.14	1.01	0.98	0.88	0.89	1.08	0.93	1.34	1.18					0.0371	0.0301	0.5633	0.3989	0.8488	0.8989	0.0092	0.0079	0.0239	0.0178	0.6979	0.8461	0.3776	0.6315	0.4447	0.6652	0.9923	0.8436	0.9047
	1179	Lipid	Fatty Acid Synthesis	malonylcarnitine	LC/MS pos early	37059		HMDB02095	22833583		3.2	1.08	0.84	0.34	0.26	0.78	1	0.9	0.68	0.9	0.68	0.75	1.02	0.32	0.86	0.83					0.0003	0.001	0.8955	0.5015	0.4832	0.8649	0.0002	0.0003	3.3838e-05	0.0001	0.5682	0.8385	0.7798	0.7023	0.5419	0.6843	0.1907	0.6487	0.7404
	1180			malonate	LC/MS polar	15872	C00383	HMDB00691	867		1.43	1.23	1.21	0.87	0.85	0.98	0.86	0.8	0.99	0.93	1.15	1.24	1.29	0.78	0.83	1.06					0.1102	0.0698	0.3767	0.3347	0.7183	0.8871	0.4639	0.191	0.2113	0.0934	0.5986	0.8385	0.5805	0.6632	0.4935	0.6828	0.9276	0.8267	0.8942
	1195		Medium Chain Fatty Acid	caproate (6:0)	LC/MS neg	32489	C01585	HMDB00535	8892		1.63	0.92	2.44	0.56	1.5	2.66	0.78	0.66	0.7	0.85	0.9	1.06	1.47	0.7	1.06	0.42					0.0658	0.0479	0.819	0.4709	0.0052	0.284	0.0401	0.0258	0.293	0.1203	0.0028	0.3444	0.4942	0.6496	0.2193	0.5696	0.3111	0.7314	0.5799
	1196			heptanoate (7:0)	LC/MS neg	1644	C17714	HMDB00666	8094		1.17	0.94	1.31	0.8	1.12	1.39	0.75	0.64	0.75	0.85	1	1.17	1.14	0.73	0.77	0.65					0.4477	0.192	0.9066	0.5036	0.3416	0.8454	0.3816	0.165	0.8458	0.2692	0.2864	0.7603	0.2431	0.5472	0.0544	0.3894	0.1758	0.6415	0.4299
	1197			caprylate (8:0)	LC/MS neg	32492	C06423	HMDB00482	379		1.57	1.13	3.94	0.72	2.52	3.47	0.73	0.48	0.52	0.66	0.72	1.09	2.64	1.22	1.11	0.35					0.3499	0.1615	0.7429	0.4566	0.0459	0.5877	0.5417	0.2101	0.2718	0.113	0.0914	0.7308	0.3844	0.6315	0.1692	0.5607	0.2147	0.6643	0.6055
	1342		Fatty Acid, Dicarboxylate	glutarate (C5-DC)	LC/MS polar	396	C00489	HMDB00661	743		3.66	0.34	1.52	0.09	0.42	4.53	2.48	0.42	0.43	0.17	0.17	1.02	0.93	0.63	1.15	0.26					0.0352	0.029	0.7063	0.4515	0.3137	0.8454	0.0144	0.011	0.253	0.1065	0.1693	0.7603	0.5354	0.659	0.3281	0.6345	0.4916	0.7737	0.1141
	1346			2-hydroxyglutarate	LC/MS pos early	52294	C02630	HMDB00606	43		0.69	0.84	0.95	1.21	1.37	1.14	0.74	0.92	0.6	1.24	0.8	0.65	1.23	1.32	1.35	0.77					0.0369	0.0301	0.2728	0.2903	0.4423	0.8649	0.3013	0.1374	0.1743	0.0821	0.7387	0.8514	0.1373	0.4901	0.6299	0.7037	0.0151	0.2222	0.3089
	1351			3-hydroxyadipate*	LC/MS polar	62069		HMDB00345	151913		8.73	0.43	0.76	0.05	0.09	1.76	0.92	0.24	0.35	0.27	0.39	1.46	1.56	0.16	0.87	0.72					0.0015	0.0031	0.1588	0.2439	0.9006	0.9027	1.9431e-05	8.7593e-05	0.001	0.0015	0.1976	0.7603	0.4043	0.6315	0.0284	0.3082	0.1081	0.4927	0.1603
	1354			maleate	LC/MS polar	20676	C01384	HMDB00176	444266		3.22	0.87	1.27	0.27	0.39	1.45	1.76	0.49	0.72	0.28	0.41	1.48	2.4	1.32	1.34	1.37					0.0033	0.005	0.9119	0.5039	0.3577	0.8497	0.0024	0.0025	0.0336	0.0226	0.3037	0.7603	0.0908	0.449	0.3662	0.659	0.8797	0.8189	0.0116
	1361			azelate (C9-DC)	LC/MS neg	18362	C08261	HMDB00784	2266		0.48	0.92	7.04	1.9	14.53	7.65	0.64	0.61	4.43	0.96	6.93	7.25	1.43	1.88	0.95	0.9					0.1682	0.0953	0.5491	0.3952	0.0354	0.583	0.4289	0.1797	0.0009	0.0014	0.0082	0.527	0.3574	0.6315	0.7161	0.7212	0.0245	0.2698	0.5754
	1363			sebacate (C10-DC)	LC/MS neg	32398	C08277	HMDB00792	5192		1.13	0.42	3.32	0.38	2.93	7.8	0.51	0.34	2.22	0.66	4.35	6.57	1.55	0.7	1.23	1.04					0.3978	0.1774	0.3311	0.3147	0.0864	0.6574	0.0734	0.0431	0.3719	0.144	0.0091	0.527	0.2459	0.5472	0.2909	0.6103	0.1161	0.5126	0.9151
	1364			undecanedioate (C11-DC)	LC/MS neg	42395		HMDB00888	15816		0.59	0.77	4.46	1.3	7.57	5.81	0.76	0.7	4.09	0.92	5.36	5.85	1.25	1.62	1.14	1.15					0.3255	0.1532	0.4315	0.3605	0.1124	0.6884	0.8419	0.2853	0.0124	0.0109	0.0203	0.5933	0.4745	0.6496	0.7354	0.7292	0.0334	0.3279	0.7046
	1367			dodecanedioate (C12-DC)	LC/MS neg	32388	C02678	HMDB00623	12736		2.87	0.59	1.45	0.21	0.51	2.45	0.92	0.78	1.55	0.85	1.68	1.99	1.11	0.36	1.46	1.19					0.043	0.0332	0.3002	0.2999	0.406	0.8649	0.0032	0.0031	0.2186	0.0956	0.0661	0.7068	0.7728	0.6975	0.7227	0.7212	0.4905	0.7737	0.9472
	1368			tetradecanedioate (C14-DC)	LC/MS neg	35669		HMDB00872	13185		8.91	1.3	1.31	0.15	0.15	1	2.2	1.13	1.48	0.52	0.67	1.3	0.81	0.2	0.71	0.92					2.5049e-06	9.6194e-05	0.5368	0.3909	0.61	0.8871	1.841e-05	8.7362e-05	1.3025e-05	8.9735e-05	0.9138	0.8655	0.1381	0.4901	0.7589	0.7367	0.3102	0.7314	0.2356
	1369			hexadecanedioate (C16-DC)	LC/MS neg	35678	C19615	HMDB00672	10459		6.08	1.03	1.27	0.17	0.21	1.23	1.95	1.03	1.31	0.53	0.67	1.27	0.83	0.27	0.84	0.86					3.0272e-05	0.0003	0.9046	0.5036	0.6418	0.8871	2.0683e-05	8.8799e-05	0.0001	0.0003	0.559	0.8385	0.0771	0.4227	0.9247	0.7741	0.3449	0.745	0.0633
	1371			hexadecenedioate (C16:1-DC)*	LC/MS neg	61862					7.34	1.62	1.36	0.22	0.18	0.84	1.55	0.82	0.67	0.52	0.43	0.82	0.92	0.19	0.46	0.45					8.1106e-05	0.0004	0.4597	0.3676	0.6868	0.8871	0.0008	0.001	0.0003	0.0006	0.7354	0.851	0.5597	0.6611	0.6379	0.7037	0.4089	0.7458	0.2945
	1421		Fatty Acid, Amino	2-aminoheptanoate	LC/MS pos early	43761			227939		1.1	1.14	1.4	1.04	1.27	1.23	0.6	1.86	0.55	3.08	0.91	0.29	2.53	1.38	4.11	0.99					0.6004	0.2382	0.7116	0.4515	0.3561	0.8497	0.8771	0.2918	0.6871	0.2263	0.5776	0.8385	0.6772	0.6741	0.0511	0.3894	0.4269	0.7522	0.0197
	1426			2-aminooctanoate	LC/MS neg	43343		HMDB00991	69522		1.17	1.34	1.16	1.15	0.99	0.86	1.32	1.94	1.49	1.47	1.13	0.77	1.13	1.28	1.64	1.46					0.6222	0.2443	0.46	0.3676	0.6497	0.8871	0.8044	0.2789	0.969	0.2951	0.7745	0.8554	0.3876	0.6315	0.0903	0.4666	0.6703	0.798	0.3937
	1437		Fatty Acid Metabolism (also BCAA Metabolism)	butyrylcarnitine (C4)	LC/MS pos early	32412	C02862	HMDB02013	439829		1.09	1.63	1.16	1.5	1.07	0.71	0.79	1.01	1.15	1.29	1.46	1.14	1.31	0.94	0.81	1.29					0.3943	0.1769	0.1672	0.246	0.6636	0.8871	0.5884	0.2202	0.6746	0.2235	0.3386	0.7603	0.8526	0.7184	0.9261	0.7741	0.5915	0.7812	0.9258
	1440			propionylcarnitine (C3)	LC/MS pos early	32452	C03017	HMDB00824	107738		6.1	1.58	1.83	0.26	0.3	1.16	2.83	1	0.97	0.36	0.34	0.96	1.56	0.72	1	0.83					0.0001	0.0006	0.2714	0.2903	0.1135	0.6884	0.003	0.003	0.0113	0.0101	0.6178	0.8455	0.1025	0.4657	0.7217	0.7212	0.8637	0.8189	0.0491
	1443			methylmalonate (MMA)	LC/MS polar	1496	C02170	HMDB00202	487		4.68	0.76	0.68	0.16	0.15	0.9	4.47	2.14	0.8	0.48	0.18	0.37	0.72	0.68	2.03	0.83					0.0016	0.0032	0.405	0.3512	0.3063	0.8454	0.0001	0.0003	7.2737e-05	0.0002	0.8467	0.8554	0.0338	0.3174	0.1055	0.4935	0.5636	0.7773	0.5909
	1452		Fatty Acid Metabolism(Acyl Glycine)	isocaproylglycine	LC/MS neg	61789					7.18	0.4	0.53	0.06	0.07	1.31	0.34	0.06	0.06	0.17	0.17	1	6.74	0.32	1	0.76					0.009	0.0106	0.5507	0.3952	0.7469	0.8871	0.0018	0.0019	0.0038	0.0044	0.7834	0.8554	0.3959	0.6315	0.0483	0.3894	0.0483	0.3697	0.2456
	1455			hexanoylglycine	LC/MS neg	35436		HMDB00701	99463		7.73	0.72	1.28	0.09	0.17	1.79	1.19	0.48	0.99	0.41	0.83	2.05	1.83	0.28	1.23	1.41					0.0003	0.001	0.3264	0.3133	0.5364	0.8817	1.4402e-05	8.1314e-05	0.0019	0.0025	0.1137	0.7378	0.81	0.7084	0.125	0.5032	0.5995	0.783	0.0779
	1459			3,4-methylene heptanoylglycine	LC/MS neg	55012					2.04	0.73	0.78	0.36	0.38	1.07	1.34	0.88	0.94	0.66	0.7	1.07	0.75	0.49	0.9	0.89					0.0288	0.0247	0.2937	0.2963	0.476	0.8649	0.0019	0.002	0.0048	0.0051	0.7322	0.851	0.2332	0.5472	0.9325	0.7757	0.8314	0.8184	0.2025
	1461			N-palmitoylglycine	LC/MS neg	42092		HMDB13034	151008		6.96	0.45	1.4	0.06	0.2	3.09	5.63	1.36	2.1	0.24	0.37	1.54	0.57	0.46	1.72	0.86					0.0002	0.0009	0.7625	0.4595	0.3993	0.8649	9.8537e-05	0.0002	0.0029	0.0036	0.2545	0.7603	0.0451	0.3401	0.4436	0.6652	0.0928	0.4637	0.2028
	1471		Fatty Acid Metabolism(Acyl Carnitine)	acetylcarnitine (C2)	LC/MS pos early	32198	C02571	HMDB00201	1		0.61	1.4	1.38	2.28	2.24	0.98	0.8	0.88	1.01	1.1	1.27	1.16	1.59	2.06	1	1.17					0.1399	0.0832	0.2206	0.2684	0.172	0.7952	0.0089	0.0077	0.0061	0.0062	0.8844	0.8554	0.417	0.6315	0.6551	0.7054	0.9844	0.8436	0.7132
	1473			3-hydroxybutyrylcarnitine (1)	LC/MS pos early	43264		HMDB13127	53481617		5.02	1.17	0.66	0.23	0.13	0.57	1.14	1.43	1.34	1.26	1.18	0.93	2.17	0.49	2.66	4.39					0.0004	0.0012	0.8595	0.4877	0.4796	0.8649	0.0007	0.0009	4.6413e-05	0.0002	0.3778	0.7603	0.6448	0.6738	0.8785	0.7665	0.5063	0.7737	0.7576
	1474			3-hydroxybutyrylcarnitine (2)	LC/MS pos early	52984		HMDB13127			0.92	1.06	0.72	1.15	0.78	0.68	0.92	0.85	0.96	0.92	1.05	1.13	1.11	1.1	0.89	1.48					0.9353	0.3265	0.843	0.4794	0.29	0.8454	0.9069	0.2995	0.2553	0.1068	0.2108	0.7603	0.8041	0.7084	0.5434	0.6843	0.8991	0.8237	0.7184
	1476			hexanoylcarnitine (C6)	LC/MS pos early	32328		HMDB00705	6426853		1.5	1.12	1.09	0.75	0.73	0.98	0.62	0.85	0.79	1.35	1.27	0.93	1.28	0.54	0.97	0.93					0.1498	0.0872	0.9944	0.525	0.5804	0.8871	0.1518	0.0791	0.3677	0.143	0.5852	0.8385	0.5342	0.659	0.5651	0.6897	0.7977	0.8134	0.9627
	1477			3-hydroxyhexanoylcarnitine (2)	LC/MS pos early	62556					1.31	0.59	0.56	0.45	0.43	0.95	1.23	0.9	0.84	0.73	0.69	0.93	1.11	1.04	1.7	1.66					0.3853	0.1741	0.0873	0.1938	0.0458	0.5877	0.012	0.0095	0.0054	0.0057	0.7593	0.8554	0.3228	0.6087	0.7241	0.7212	0.8212	0.8152	0.1825
	1478			3-hydroxyhexanoylcarnitine (1)	LC/MS pos early	62557					0.85	0.62	0.65	0.74	0.77	1.05	0.97	1.03	0.84	1.06	0.87	0.82	1.03	1.18	1.7	1.32					0.4811	0.2044	0.0329	0.1516	0.0228	0.4915	0.1419	0.0742	0.1053	0.0548	0.8744	0.8554	0.8592	0.7201	0.7918	0.7467	0.5228	0.7737	0.6592
	1479			octanoylcarnitine (C8)	LC/MS pos late	33936	C02838	HMDB00791	123701		1.34	0.83	1.15	0.62	0.86	1.38	0.46	0.69	0.53	1.5	1.16	0.77	1.57	0.54	1.31	0.73					0.2318	0.1216	0.4286	0.3605	0.5462	0.8867	0.0508	0.0318	0.5483	0.1938	0.1667	0.7603	0.3557	0.6315	0.6919	0.7131	0.4805	0.7737	0.5955
	1481			decanoylcarnitine (C10)	LC/MS pos late	33941		HMDB00651	10245190		1.14	0.91	1.65	0.79	1.44	1.81	0.46	0.58	0.44	1.25	0.95	0.76	2.06	0.84	1.31	0.55					0.4065	0.1794	0.7015	0.4498	0.1536	0.7532	0.2278	0.1104	0.5415	0.1922	0.0731	0.7068	0.3863	0.6315	0.5349	0.6828	0.4099	0.7458	0.8039
	1484			cis-4-decenoylcarnitine (C10:1)	LC/MS pos late	38178					1.99	1.04	1.23	0.52	0.62	1.19	0.59	1.11	0.8	1.89	1.37	0.72	1.18	0.35	1.27	0.77					0.1026	0.0675	0.7803	0.4595	0.5638	0.8871	0.058	0.0354	0.2829	0.1168	0.3933	0.7603	0.9148	0.7374	0.3463	0.6484	0.3839	0.7458	0.2952
	1485			laurylcarnitine (C12)	LC/MS pos late	34534		HMDB02250	10427569		0.52	0.62	1.13	1.2	2.18	1.82	0.44	0.58	0.32	1.33	0.73	0.55	1.54	1.31	1.44	0.43					0.1878	0.103	0.1789	0.2515	0.4829	0.8649	0.9777	0.3167	0.0471	0.0288	0.0443	0.7068	0.1316	0.4877	0.2655	0.5994	0.0379	0.3344	0.684
	1486			myristoylcarnitine (C14)	LC/MS pos late	33952		HMDB05066	6426854		0.55	0.64	1.34	1.17	2.44	2.08	0.45	0.56	0.34	1.23	0.76	0.62	1.58	1.3	1.36	0.4					0.1211	0.0745	0.2528	0.2813	0.4965	0.8649	0.6742	0.2445	0.0287	0.0203	0.0722	0.7068	0.1005	0.4657	0.2469	0.5916	0.0426	0.3578	0.6156
	1488			palmitoylcarnitine (C16)	LC/MS pos late	44681	C02990	HMDB00222	461		0.52	0.52	1.16	1	2.21	2.21	0.55	0.61	0.51	1.11	0.93	0.84	1.47	1.54	1.7	0.65					0.0573	0.0423	0.2002	0.2609	0.8408	0.8989	0.5162	0.2041	0.0369	0.0242	0.1403	0.7378	0.2382	0.5472	0.3666	0.659	0.211	0.6643	0.7778
	1489			palmitoleoylcarnitine (C16:1)*	LC/MS pos late	53223			71464547		0.64	0.8	1.22	1.25	1.91	1.52	0.32	0.46	0.24	1.43	0.75	0.52	2	0.99	1.13	0.39					0.5308	0.2183	0.4777	0.3726	0.472	0.8649	0.9331	0.3059	0.182	0.0845	0.1568	0.7603	0.0211	0.2502	0.127	0.5032	0.0064	0.1179	0.4042
	1490			stearoylcarnitine (C18)	LC/MS pos late	34409		HMDB00848	6426855		0.58	0.57	0.75	0.98	1.3	1.32	0.67	0.81	0.69	1.22	1.04	0.85	1.55	1.77	2.2	1.42					0.2486	0.129	0.2678	0.2903	0.4635	0.8649	0.9628	0.3128	0.669	0.223	0.7032	0.8461	0.3801	0.6315	0.7235	0.7212	0.4063	0.7458	0.5983
	1491			linoleoylcarnitine (C18:2)*	LC/MS pos late	46223		HMDB06469	6450015		0.87	0.94	1.01	1.08	1.16	1.07	0.43	0.47	0.27	1.09	0.62	0.57	2.42	1.22	1.23	0.65					0.8511	0.3059	0.4818	0.3738	0.9595	0.9053	0.374	0.1625	0.891	0.2793	0.451	0.777	0.2654	0.5663	0.2526	0.5953	0.0243	0.2698	0.9751
	1492			linolenoylcarnitine (C18:3)*	LC/MS pos late	57511					0.56	1.34	1.08	2.4	1.95	0.81	0.23	0.66	0.19	2.9	0.83	0.29	1.72	0.7	0.85	0.3					0.5629	0.2271	0.9053	0.5036	0.8865	0.9027	0.6454	0.2363	0.4714	0.172	0.7936	0.8554	0.1605	0.5099	0.7593	0.7367	0.0986	0.4685	0.2687
	1493			3-hydroxyoleoylcarnitine	LC/MS pos late	61840					0.7	0.41	0.64	0.59	0.91	1.55	0.97	0.78	0.72	0.8	0.74	0.93	1.1	1.52	2.07	1.25					0.8596	0.3074	0.0593	0.1714	0.4516	0.8649	0.0854	0.0491	0.5637	0.1974	0.2444	0.7603	0.7578	0.6975	0.388	0.6652	0.2686	0.7007	0.577
	1494			oleoylcarnitine (C18:1)	LC/MS pos late	35160		HMDB05065	6441392		0.64	0.68	1.09	1.06	1.69	1.6	0.46	0.47	0.37	1.02	0.8	0.79	1.97	1.42	1.37	0.67					0.3955	0.177	0.2985	0.2991	0.9031	0.9027	0.8468	0.2859	0.3323	0.1326	0.2466	0.7603	0.1113	0.4657	0.1197	0.5032	0.0533	0.3982	0.9695
	1496			myristoleoylcarnitine (C14:1)*	LC/MS pos late	48182			90659872		0.48	0.86	1.3	1.79	2.68	1.5	0.28	0.54	0.24	1.97	0.85	0.43	2.35	1.34	1.48	0.43					0.2798	0.1388	0.7104	0.4515	0.262	0.8454	0.4747	0.1932	0.0312	0.0212	0.1385	0.7378	0.0205	0.2502	0.1681	0.5607	0.0155	0.2222	0.3187
	1507			arachidoylcarnitine (C20)*	LC/MS pos late	57513		HMDB06460			1.11	0.73	0.61	0.65	0.55	0.84	0.67	0.67	0.59	0.99	0.87	0.88	1.96	1.19	1.79	1.89					0.4289	0.1869	0.6183	0.4237	0.3045	0.8454	0.2006	0.0991	0.0733	0.0404	0.5935	0.8385	0.6742	0.6741	0.6492	0.7051	0.3428	0.745	0.9724
	1508			arachidonoylcarnitine (C20:4)	LC/MS pos late	57518					1.41	0.67	0.56	0.48	0.4	0.83	1.52	1.75	0.84	1.15	0.55	0.48	0.6	0.65	1.55	0.9					0.198	0.1065	0.1848	0.2518	0.2257	0.8454	0.0112	0.0091	0.0151	0.0128	0.906	0.8643	0.2984	0.5874	0.1823	0.5607	0.8177	0.8152	0.7629
	1509			adrenoylcarnitine (C22:4)*	LC/MS pos late	57528					0.45	0.88	0.62	1.96	1.37	0.7	1.02	1.46	0.89	1.43	0.87	0.61	0.78	1.76	1.29	1.12					0.2332	0.122	0.5715	0.4023	0.2914	0.8454	0.5259	0.2061	0.8884	0.2791	0.6208	0.8455	0.9413	0.7443	0.4897	0.6828	0.9442	0.8336	0.5368
	1510			behenoylcarnitine (C22)*	LC/MS pos late	57514					0.77	0.5	0.7	0.65	0.91	1.39	0.45	0.34	0.42	0.76	0.93	1.22	2.51	1.45	1.69	1.49					0.4951	0.2076	0.1806	0.2515	0.5305	0.8784	0.504	0.2006	0.9558	0.2925	0.4696	0.7897	0.5792	0.6632	0.2143	0.5696	0.3928	0.7458	0.4863
	1512			dihomo-linolenoylcarnitine (C20:3n3 or 6)*	LC/MS pos late	57521					0.79	0.92	0.91	1.16	1.16	0.99	0.75	0.89	0.66	1.19	0.88	0.74	1.04	0.99	1.01	0.75					0.8708	0.3096	0.4804	0.3738	0.5073	0.8687	0.3862	0.1662	0.4099	0.1549	0.9657	0.8744	0.7669	0.6975	0.8205	0.7571	0.4688	0.7737	0.9445
	1513			dihomo-linoleoylcarnitine (C20:2)*	LC/MS pos late	57520					0.53	0.71	0.79	1.32	1.48	1.12	0.47	0.46	0.54	0.99	1.14	1.15	2.14	1.88	1.4	1.44					0.3637	0.1663	0.7473	0.4568	0.7001	0.8871	0.5556	0.2141	0.5984	0.2069	0.9497	0.8683	0.2181	0.5472	0.2575	0.5958	0.4004	0.7458	0.9188
	1514			eicosenoylcarnitine (C20:1)*	LC/MS pos late	57519					0.92	0.78	0.75	0.84	0.81	0.96	0.67	0.59	0.67	0.89	1.01	1.14	1.66	1.2	1.27	1.5					0.7915	0.2917	0.776	0.4595	0.6083	0.8871	0.5836	0.2202	0.4384	0.1631	0.8191	0.8554	0.3961	0.6315	0.2877	0.6103	0.4381	0.7558	0.8273
	1515			erucoylcarnitine (C22:1)*	LC/MS pos late	57525					1.83	0.61	0.55	0.33	0.3	0.91	0.76	0.69	0.57	0.9	0.75	0.84	1.65	0.68	1.85	1.7					0.0285	0.0245	0.7184	0.4529	0.3352	0.8454	0.0119	0.0094	0.0024	0.003	0.5438	0.8324	0.964	0.7458	0.6758	0.7055	0.4278	0.7522	0.709
	1516			docosadienoylcarnitine (C22:2)*	LC/MS pos late	57526					0.98	0.61	0.6	0.62	0.61	0.98	0.87	0.91	0.98	1.04	1.12	1.08	1.26	1.12	1.89	2.07					0.378	0.1712	0.8375	0.4785	0.4537	0.8649	0.2788	0.1299	0.1072	0.0553	0.5853	0.8385	0.769	0.6975	0.805	0.7543	0.8958	0.8237	0.9626
	1517			docosatrienoylcarnitine (C22:3)*	LC/MS pos late	57527					0.64	0.68	0.72	1.05	1.11	1.06	0.82	1.12	0.84	1.36	1.02	0.75	0.98	1.25	1.62	1.14					0.2648	0.1345	0.6466	0.4344	0.4259	0.8649	0.5074	0.2015	0.7458	0.241	0.7338	0.851	0.6474	0.6738	0.8912	0.7732	0.5556	0.7773	0.5529
	1518			docosapentaenoylcarnitine (C22:5n3)*	LC/MS pos late	57529					0.68	0.7	0.88	1.03	1.29	1.25	0.71	1.18	0.69	1.66	0.97	0.59	0.9	0.94	1.52	0.71					0.8204	0.3	0.2232	0.2693	0.458	0.8649	0.3192	0.1443	0.6053	0.2079	0.6283	0.8461	0.6939	0.6832	0.6348	0.7037	0.6033	0.7837	0.3868
	1519			docosahexaenoylcarnitine (C22:6)*	LC/MS pos late	57523					2.84	1.28	0.74	0.45	0.26	0.58	3.29	1.76	0.85	0.53	0.26	0.48	0.59	0.68	0.81	0.67					0.0194	0.0183	0.3386	0.3178	0.4353	0.8649	0.0015	0.0017	0.0025	0.0032	0.8577	0.8554	0.0435	0.3362	0.1675	0.5607	0.8645	0.8189	0.5006
	1521			lignoceroylcarnitine (C24)*	LC/MS pos late	57515					0.41	0.41	0.92	1.01	2.25	2.23	0.78	0.63	0.78	0.8	1	1.25	1.46	2.78	2.2	1.24					0.0181	0.0173	0.1501	0.2439	0.8787	0.9027	0.3241	0.1457	0.026	0.0187	0.1965	0.7603	0.6768	0.6741	0.6304	0.7037	0.9703	0.8426	0.9486
	1522			margaroylcarnitine (C17)*	LC/MS pos late	57512		HMDB06210			0.88	0.5	1.45	0.57	1.65	2.88	0.71	0.63	0.61	0.88	0.85	0.97	1.68	1.36	2.08	0.7					0.9167	0.323	0.0943	0.1962	0.7341	0.8871	0.0764	0.0443	0.814	0.2615	0.0463	0.7068	0.5534	0.6611	0.3153	0.628	0.2704	0.7007	0.6772
	1523			nervonoylcarnitine (C24:1)*	LC/MS pos late	57531					0.8	0.44	0.99	0.55	1.24	2.25	0.89	0.67	0.8	0.76	0.9	1.2	1.31	1.45	1.99	1.06					0.2772	0.1379	0.1525	0.2439	0.7128	0.8871	0.7231	0.2562	0.4691	0.172	0.2832	0.7603	0.9209	0.7395	0.4324	0.6652	0.9361	0.8311	0.4922
	1526			pentadecanoylcarnitine (C15)*	LC/MS pos late	57522					0.38	0.52	5.23	1.38	13.8	10.03	0.44	0.51	0.47	1.15	1.05	0.92	1.55	1.81	1.51	0.14					0.0111	0.0123	0.2143	0.2673	0.3069	0.8454	0.1694	0.087	0.0007	0.0011	0.0269	0.6606	0.1487	0.5026	0.324	0.6313	0.3035	0.7314	0.6382
	1527			docosapentaenoylcarnitine (C22:5n6)*	LC/MS pos late	57530					1.02	0.78	0.5	0.77	0.49	0.64	1.73	1.87	0.92	1.08	0.53	0.49	0.52	0.88	1.24	0.97					0.5798	0.2329	0.1617	0.2439	0.118	0.6884	0.0542	0.0336	0.0372	0.0243	0.8643	0.8554	0.237	0.5472	0.1657	0.5607	0.8803	0.8189	0.8335
	1529			3-hydroxypalmitoylcarnitine	LC/MS pos late	61839					0.58	0.37	0.61	0.63	1.05	1.65	1	0.94	0.79	0.94	0.79	0.85	0.94	1.61	2.39	1.22					0.1911	0.1045	0.0263	0.1379	0.2224	0.8443	0.3345	0.1497	0.9284	0.2879	0.2922	0.7603	0.948	0.7457	0.9173	0.7741	0.3718	0.7458	0.9692
	1531		Carnitine Metabolism	deoxycarnitine	LC/MS pos early	36747	C01181	HMDB01161	134		1.78	0.82	1.07	0.46	0.6	1.31	2.03	0.89	0.86	0.44	0.43	0.97	1.21	1.38	1.33	0.98					0.0204	0.019	0.5889	0.4077	0.875	0.9027	0.0052	0.0048	0.0296	0.0205	0.4861	0.8018	0.1569	0.5061	0.6599	0.7054	0.5186	0.7737	0.0666
	1532			carnitine	LC/MS pos early	15500	C00318	HMDB00062	10917		2.51	1.13	0.91	0.45	0.36	0.81	1.14	0.99	0.9	0.87	0.79	0.91	1.19	0.54	1.05	1.18					0.0001	0.0005	0.5803	0.4075	0.611	0.8871	0.0006	0.0008	2.0836e-05	9.8181e-05	0.291	0.7603	0.5681	0.6611	0.9499	0.7841	0.5793	0.7781	0.5266
	1537		Ketone Bodies	3-hydroxybutyrate (BHBA)	LC/MS polar	542	C01089	HMDB00357	441		5.29	1.47	0.97	0.28	0.18	0.66	1.29	0.81	1.77	0.63	1.37	2.18	2.4	0.59	1.32	4.37					0.0023	0.004	0.5304	0.3891	0.559	0.8871	0.0124	0.0096	0.0111	0.01	0.9654	0.8744	0.732	0.6905	0.2477	0.5916	0.1759	0.6415	0.1369
	1540		Fatty Acid Metabolism (Acyl Choline)	palmitoylcholine	LC/MS pos late	52944			151731		2.99	0.48	1.61	0.16	0.54	3.37	1.14	1.15	0.9	1.01	0.79	0.79	1.25	0.48	3.02	0.7					0.0079	0.0096	0.0636	0.1714	0.5965	0.8871	3.0409e-05	0.0001	0.0293	0.0205	0.0192	0.5933	0.353	0.6315	0.2921	0.6103	0.7514	0.8056	0.8988
	1541			oleoylcholine	LC/MS pos late	53260					6.64	0.24	2.03	0.04	0.31	8.61	2.29	0.79	2.23	0.34	0.97	2.82	0.72	0.25	2.41	0.79					0.0002	0.0007	0.1943	0.2576	0.2805	0.8454	2.5124e-06	4.1185e-05	0.0038	0.0044	0.0204	0.5933	0.1605	0.5099	0.9194	0.7741	0.5467	0.7773	0.1335
	1542			palmitoloelycholine	LC/MS pos late	53257					3.74	0.22	1.6	0.06	0.43	7.4	1.34	0.87	1.62	0.65	1.21	1.87	0.63	0.22	2.53	0.64					0.001	0.0023	0.1789	0.2515	0.602	0.8871	1.5519e-05	8.4801e-05	0.0044	0.0048	0.0655	0.7068	0.4814	0.6496	0.9625	0.7873	0.6588	0.798	0.511
	1544			linoleoylcholine*	LC/MS pos late	57463					3.48	0.17	2.05	0.05	0.59	11.77	4.92	1.06	3.52	0.22	0.71	3.31	0.44	0.62	2.69	0.76					0.0029	0.0046	0.2343	0.2756	0.4739	0.8649	8.3782e-05	0.0002	0.0189	0.015	0.0606	0.7068	0.0865	0.4413	0.9186	0.7741	0.4036	0.7458	0.1059
	1546			stearoylcholine*	LC/MS pos late	57464					11.98	0.85	2.18	0.07	0.18	2.55	1.37	0.44	0.7	0.32	0.52	1.61	3.16	0.36	1.62	1.02					3.1577e-05	0.0003	0.7762	0.4595	0.4091	0.8649	1.2754e-05	7.9218e-05	0.0004	0.0008	0.2692	0.7603	0.3261	0.6095	0.7607	0.7367	0.9181	0.8252	0.2007
	1548			arachidonoylcholine	LC/MS pos late	53261					1.92	0.55	2.33	0.29	1.21	4.23	2.78	1.39	2.34	0.5	0.84	1.68	0.68	0.99	1.73	0.69					0.2644	0.1345	0.4173	0.3546	0.3358	0.8454	0.058	0.0354	0.8755	0.2765	0.0804	0.7205	0.138	0.4901	0.54	0.6843	0.173	0.6415	0.376
	1555		Fatty Acid, Monohydroxy	2-hydroxyheptanoate*	LC/MS polar	61827			2750949		0.82	0.74	3.1	0.9	3.76	4.19	1.05	0.5	1.56	0.48	1.49	3.1	1.93	2.45	1.31	0.97					0.7233	0.2734	0.564	0.3989	0.0526	0.5877	0.823	0.282	0.0235	0.0177	0.0137	0.527	0.9658	0.7459	0.437	0.6652	0.6199	0.7901	0.4124
	1557			2-hydroxydecanoate	LC/MS neg	42489			21488		0.83	0.7	1.38	0.84	1.65	1.96	0.68	0.55	0.7	0.8	1.02	1.27	2.1	1.72	1.64	1.06					0.6101	0.2411	0.3407	0.3187	0.3768	0.8649	0.6549	0.239	0.1669	0.0795	0.0705	0.7068	0.2806	0.5738	0.3202	0.6293	0.5481	0.7773	0.931
	1560			2-hydroxypalmitate	LC/MS neg	35675		HMDB31057	92836		0.73	0.51	2.17	0.71	2.98	4.21	0.68	0.96	1.32	1.42	1.95	1.37	0.97	0.9	1.82	0.59					0.2678	0.1352	0.5198	0.3851	0.3273	0.8454	0.6379	0.2348	0.0407	0.0258	0.1086	0.7342	0.4068	0.6315	0.9972	0.7901	0.4045	0.7458	0.4049
	1562			2-hydroxystearate	LC/MS neg	17945	C03045		69417		1.19	0.71	1.42	0.59	1.19	2.01	0.75	1.38	1.71	1.83	2.26	1.24	1.09	0.69	2.12	1.31					0.9743	0.3346	0.9848	0.5249	0.5825	0.8871	0.9895	0.3193	0.6047	0.2079	0.5956	0.8385	0.3456	0.6297	0.5757	0.6931	0.2133	0.6643	0.1367
	1569			3-hydroxyhexanoate	LC/MS neg	53230			151492		1.1	0.7	0.87	0.64	0.79	1.24	1.1	1.29	0.61	1.18	0.55	0.47	1.25	1.25	2.3	0.88					0.5167	0.2143	0.18	0.2515	0.3175	0.8454	0.0503	0.0316	0.1035	0.0542	0.7264	0.851	0.3988	0.6315	0.1886	0.5607	0.0909	0.4637	0.6306
	1570			3-hydroxyoctanoate	LC/MS neg	22001		HMDB01954	26613		0.57	0.48	0.63	0.84	1.1	1.31	1.03	1.33	0.89	1.29	0.87	0.67	1.24	2.24	3.45	1.77					0.1151	0.0721	0.051	0.1605	0.2234	0.8443	0.6907	0.2481	0.7103	0.2331	0.4429	0.7742	0.5498	0.6611	0.4015	0.6652	0.6648	0.798	0.1545
	1572			3-hydroxydecanoate	LC/MS neg	22053		HMDB02203	26612		0.62	0.4	0.52	0.65	0.84	1.3	1.15	1.65	0.84	1.44	0.73	0.51	0.89	1.66	3.7	1.46					0.161	0.0926	0.0049	0.0736	0.0639	0.6124	0.1284	0.0683	0.6354	0.216	0.289	0.7603	0.7128	0.6877	0.0787	0.4403	0.4102	0.7458	0.1594
	1574			3-hydroxylaurate	LC/MS neg	32457		HMDB00387	94216		0.57	0.35	0.4	0.6	0.7	1.16	1.12	1.68	0.63	1.5	0.56	0.38	0.81	1.59	3.94	1.27					0.103	0.0675	0.0011	0.0429	0.0097	0.4193	0.0706	0.0418	0.3014	0.1235	0.4224	0.7603	0.6412	0.6738	0.0526	0.3894	0.076	0.4553	0.1344
	1577			3-hydroxypalmitate	LC/MS neg	27503		HMDB10734	301590		1.25	0.7	1.01	0.57	0.81	1.43	0.89	0.86	0.68	0.96	0.76	0.8	1.04	0.74	1.26	0.7					0.7201	0.2727	0.2908	0.2945	0.763	0.8871	0.4821	0.194	0.9546	0.2925	0.4477	0.7742	0.953	0.7458	0.9239	0.7741	0.6256	0.7912	0.9708
	1587			8-hydroxyoctanoate	LC/MS neg	21239		HMDB61914	69820		0.91	0.97	5.88	1.07	6.47	6.05	1.13	0.54	1.71	0.48	1.52	3.17	3.5	4.33	1.94	1.02					0.927	0.3248	0.9833	0.5249	0.0217	0.4915	0.9104	0.3001	0.0174	0.0142	0.0228	0.5933	0.561	0.6611	0.4056	0.6652	0.5077	0.7737	0.8005
	1589			16-hydroxypalmitate	LC/MS neg	39609	C18218	HMDB06294	10466		0.83	0.72	1.39	0.87	1.67	1.93	1.02	0.6	0.63	0.59	0.62	1.06	1.16	1.42	0.96	0.53					0.5067	0.211	0.3345	0.3149	0.4806	0.8649	0.7605	0.2663	0.1746	0.0821	0.099	0.7342	0.395	0.6315	0.2053	0.5696	0.2243	0.6744	0.6713
	1593			13-HODE + 9-HODE	LC/MS neg	37752			43013		0.97	0.5	1.07	0.51	1.11	2.17	0.62	0.31	0.36	0.5	0.59	1.18	2.86	1.82	1.76	0.96					0.3102	0.1493	0.2406	0.2756	0.7137	0.8871	0.871	0.2914	0.17	0.0806	0.1264	0.7378	0.5557	0.6611	0.2338	0.5801	0.2653	0.7007	0.5422
	1596			14-HDoHE/17-HDoHE	LC/MS neg	53034					1.84	0.5	0.71	0.27	0.39	1.42	0.62	0.36	0.67	0.58	1.08	1.87	1.83	0.62	1.32	1.74					0.3153	0.1505	0.3187	0.3133	0.6467	0.8871	0.9943	0.3196	0.5819	0.2027	0.5868	0.8385	0.4205	0.6344	0.1561	0.5591	0.7861	0.8134	0.5312
	1608			3-hydroxystearate	LC/MS neg	52938			5282907		1.47	2.39	1.07	1.62	0.73	0.45	1.11	1.16	1.14	1.04	1.02	0.98	0.49	0.37	0.24	0.51					0.8412	0.3047	0.6634	0.4383	0.1637	0.7757	0.5257	0.2061	0.2306	0.0986	0.0706	0.7068	0.4153	0.6315	0.9727	0.7873	0.8921	0.8231	0.4349
	1615		Fatty Acid, Dihydroxy	9,10-DiHOME	LC/MS neg	38399	C14828	HMDB04704	9966640		1.85	0.61	1.53	0.33	0.83	2.51	2.47	1.42	0.91	0.58	0.37	0.64	0.5	0.67	1.16	0.29					0.0924	0.0629	0.1615	0.2439	0.9021	0.9027	0.0031	0.0031	0.1174	0.0596	0.1289	0.7378	0.2228	0.5472	0.3709	0.659	0.8904	0.8231	0.7406
	1640		Eicosanoid	prostaglandin E2	LC/MS neg	7746	C00584	HMDB01220	5280360		0.12	0.08	0.42	0.69	3.53	5.08	0.4	1.24	0.51	3.09	1.27	0.41	0.53	1.8	8	0.65					0.0005	0.0014	0.004	0.0734	0.3916	0.8649	0.4763	0.1934	0.0059	0.0061	0.0343	0.6787	0.0312	0.3067	0.6713	0.7054	0.2085	0.6633	0.0785
	1646			prostaglandin D2	LC/MS neg	7737	C00696	HMDB01403	448457		0.21	0.36	0.44	1.68	2.07	1.24	1.18	2.11	1.15	1.78	0.98	0.55	0.55	3.06	3.26	1.44					0.2639	0.1345	0.7393	0.4558	0.6662	0.8871	0.4295	0.1797	0.4888	0.1768	0.9213	0.8666	0.9123	0.7368	0.2293	0.5781	0.6917	0.798	0.2736
	1652			prostaglandin F2alpha	LC/MS neg	19398	C00639	HMDB01139	5280363		0.28	0.67	0.65	2.42	2.37	0.98	1.26	0.92	1.57	0.73	1.25	1.7	0.95	4.36	1.32	2.29					0.0135	0.014	0.2477	0.2795	0.347	0.8455	0.1661	0.0856	0.1105	0.0566	0.8258	0.8554	0.807	0.7084	0.2362	0.5829	0.5363	0.7749	0.1553
	1656			6-keto prostaglandin F1alpha	LC/MS pos late	20476	C05961	HMDB02886	5280888		0.49	0.3	0.65	0.61	1.32	2.17	0.67	1.51	1.07	2.24	1.59	0.71	0.88	1.2	4.44	1.45					0.003	0.0047	0.0591	0.1714	0.5326	0.8784	0.2284	0.1104	0.0152	0.0128	0.1966	0.7603	0.5366	0.659	0.2547	0.5954	0.7546	0.8056	0.0828
	1695			12-HETE	LC/MS neg	37536		HMDB06111	5312983		1.61	0.56	0.56	0.35	0.35	1	0.59	0.51	0.72	0.86	1.22	1.42	1.68	0.61	1.51	2.14					0.14	0.0832	0.3591	0.3291	0.4407	0.8649	0.5666	0.217	0.4715	0.172	0.8823	0.8554	0.3737	0.6315	0.5093	0.6828	0.808	0.8152	0.8165
	1697			15-HETE	LC/MS neg	37538	C04742	HMDB02110	5280724		0.93	0.44	0.56	0.48	0.61	1.28	0.76	0.55	0.89	0.73	1.17	1.6	1.14	0.93	1.43	1.79					0.0239	0.0214	0.1422	0.2388	0.4034	0.8649	0.4003	0.1713	0.1407	0.0686	0.5177	0.8193	0.566	0.6611	0.494	0.6828	0.876	0.8189	0.9117
	1701			12-HHTrE	LC/MS neg	57393	C20388	HMDB12535	5283141		0.56	0.33	0.59	0.59	1.06	1.79	0.7	1.53	0.62	2.17	0.88	0.4	1.15	1.46	5.38	1.21					0.0227	0.0206	0.0146	0.1078	0.268	0.8454	0.856	0.288	0.2195	0.0957	0.1605	0.7603	0.4268	0.6416	0.4398	0.6652	0.204	0.6623	0.1212
	1708		Endocannabinoid	oleoyl ethanolamide	LC/MS pos late	38102		HMDB02088	5283454		0.36	0.46	0.48	1.28	1.36	1.06	0.39	0.5	0.44	1.28	1.14	0.89	0.88	0.96	0.96	0.8					0.0019	0.0035	0.0349	0.1516	0.0208	0.4915	0.2585	0.122	0.3612	0.1415	0.825	0.8554	0.0237	0.2502	0.1184	0.5032	0.0438	0.3584	0.4539
	1711			palmitoyl ethanolamide	LC/MS pos late	38165	C16512	HMDB02100	4671		0.36	0.13	0.64	0.37	1.76	4.81	0.22	0.15	0.14	0.67	0.61	0.91	1.66	1.03	1.89	0.36					0.1204	0.0745	0.0006	0.0276	0.2594	0.8454	0.0366	0.0243	0.6602	0.2222	0.0128	0.527	0.0378	0.3265	0.0067	0.2138	0.0049	0.1037	0.4804
	1712			stearoyl ethanolamide	LC/MS pos late	38625		HMDB13078	27902		0.32	0.1	0.7	0.31	2.14	6.89	0.17	0.12	0.12	0.71	0.74	1.05	1.92	0.99	2.25	0.34					0.1813	0.1	0.0012	0.0429	0.4102	0.8649	0.0386	0.0252	0.6002	0.2069	0.011	0.527	0.0438	0.3362	0.0129	0.2763	0.0138	0.218	0.6056
	1713			docosahexaenoyl ethanolamide	LC/MS pos late	43768			5283451		0.49	0.47	0.49	0.96	0.99	1.03	1.53	1.66	1.8	1.09	1.18	1.08	0.62	1.92	2.18	2.29					0.2148	0.1137	0.3243	0.3133	0.275	0.8454	0.7943	0.2765	0.8787	0.2766	0.9138	0.8655	0.5639	0.6611	0.4638	0.68	0.3512	0.745	0.8754
	1719			N-arachidonoyltaurine	LC/MS neg	54748					9.58	0.51	1.41	0.05	0.15	2.75	14.28	1.46	4.97	0.1	0.35	3.39	0.36	0.54	1.04	1.28					4.5138e-05	0.0003	0.7547	0.458	0.5819	0.8871	1.6736e-05	8.6226e-05	0.0002	0.0006	0.3896	0.7603	0.0328	0.315	0.5677	0.6897	0.0478	0.3697	0.1099
	1720			N-oleoyltaurine	LC/MS neg	39732			6437033		6.13	0.67	0.78	0.11	0.13	1.16	1.27	0.44	0.71	0.35	0.56	1.62	1.43	0.3	0.94	1.31					0.0002	0.0007	0.7793	0.4595	0.7703	0.8871	0.0004	0.0005	0.0004	0.0008	0.9906	0.8797	0.8108	0.7084	0.2824	0.6103	0.8236	0.8152	0.1908
	1721			N-stearoyltaurine	LC/MS neg	39730			168274		0.87	0.4	0.46	0.46	0.52	1.13	1.01	1	1.41	0.99	1.4	1.41	0.7	0.81	1.73	2.17					0.4234	0.1852	0.8744	0.4924	0.6886	0.8871	0.3389	0.1512	0.2324	0.0991	0.8081	0.8554	0.786	0.705	0.8621	0.7598	0.4988	0.7737	0.922
	1722			N-palmitoyltaurine	LC/MS neg	39835					2.8	0.8	0.88	0.29	0.31	1.09	1.11	0.62	0.82	0.56	0.74	1.33	1.15	0.46	0.89	1.08					0.0049	0.0067	0.6722	0.4401	0.6169	0.8871	0.0147	0.0112	0.0177	0.0144	0.9384	0.8683	0.8983	0.7311	0.5109	0.6828	0.689	0.798	0.5958
	1724			N-linoleoyltaurine*	LC/MS neg	61826					18.51	0.52	0.68	0.03	0.04	1.32	2.38	0.48	0.64	0.2	0.27	1.33	2.05	0.26	1.9	1.92					8.5388e-06	0.0001	0.4106	0.3539	0.6984	0.8871	5.852e-07	1.8281e-05	2.4375e-06	3.7977e-05	0.6613	0.8461	0.499	0.6496	0.3627	0.659	0.9954	0.8436	0.1168
	1726			linoleoyl ethanolamide	LC/MS neg	52608		HMDB12252	5283446		1.13	0.9	0.85	0.8	0.75	0.94	0.49	0.63	0.89	1.29	1.82	1.41	1.18	0.51	0.82	1.23					0.8556	0.3065	0.6937	0.4482	0.7099	0.8871	0.832	0.283	0.8491	0.2697	0.9825	0.8797	0.2457	0.5472	0.6044	0.7037	0.691	0.798	0.5157
	1734			palmitoleoyl ethanolamide*	LC/MS pos late	57541		HMDB13648	9835868		0.18	0.39	0.55	2.15	3.09	1.43	0.22	0.41	0.37	1.84	1.66	0.9	0.53	0.65	0.56	0.35					0.0017	0.0032	0.2384	0.2756	0.3214	0.8454	0.0357	0.0239	0.0229	0.0173	0.848	0.8554	0.0169	0.2378	0.1643	0.5607	0.1049	0.4829	0.288
	1738			N-oleoylserine	LC/MS neg	57664					10.08	0.83	1.74	0.08	0.17	2.1	2.69	0.92	0.95	0.34	0.35	1.03	0.9	0.24	1	0.49					4.9479e-05	0.0003	0.7296	0.4541	0.3631	0.8519	1.652e-05	8.6226e-05	0.0008	0.0013	0.2121	0.7603	0.2826	0.574	0.8572	0.7598	0.9091	0.8244	0.2113
	1743		Inositol Metabolism	myo-inositol	LC/MS polar	1124	C00137	HMDB00211	892		0.56	0.76	0.98	1.35	1.74	1.29	0.8	0.79	0.71	0.99	0.89	0.89	1.21	1.71	1.26	0.87					0.0027	0.0045	0.2172	0.2676	0.948	0.9027	0.0595	0.0361	0.0033	0.0039	0.2418	0.7603	0.1832	0.5149	0.2819	0.6103	0.1779	0.6415	0.7934
	1752			inositol 1-phosphate (I1P)	LC/MS polar	43849	C01177	HMDB00213	440194		1.27	0.61	1	0.48	0.78	1.64	0.89	0.74	0.18	0.84	0.21	0.25	2.57	1.78	3.14	0.47					0.4725	0.2012	0.4387	0.3619	0.8909	0.9027	0.1396	0.0734	0.3931	0.1509	0.5232	0.8193	0.246	0.5472	0.3883	0.6652	0.0021	0.0635	0.7618
	1772		Phospholipid Metabolism	choline	LC/MS pos early	15506	C00114	HMDB00097	305		1.13	0.76	0.94	0.67	0.83	1.24	1.52	1.26	1.29	0.83	0.85	1.02	0.8	1.07	1.33	1.09					0.3168	0.1506	0.2196	0.2683	0.8081	0.8942	0.0293	0.0202	0.2156	0.0945	0.3221	0.7603	0.0361	0.3256	0.2063	0.5696	0.2619	0.7007	0.3819
	1773			choline phosphate	LC/MS pos early	34396	C00588	HMDB01565	1014		4.33	1.15	0.9	0.27	0.21	0.79	3.78	1.75	1.53	0.46	0.41	0.88	0.89	0.78	1.35	1.51					0.0001	0.0007	0.5861	0.4077	0.8268	0.8989	0.0008	0.001	7.5861e-05	0.0002	0.4463	0.7742	0.0017	0.0874	0.1337	0.5072	0.2067	0.6623	0.0742
	1774			cytidine 5'-diphosphocholine	LC/MS pos early	34418	C00307	HMDB01413	13804		1.98	1.46	1.23	0.74	0.62	0.84	2.13	1.48	0.95	0.7	0.45	0.65	1.95	2.09	1.97	1.51					0.1454	0.0852	0.4471	0.3622	0.4423	0.8649	0.4774	0.1934	0.0293	0.0205	0.1305	0.7378	0.1517	0.5026	0.5065	0.6828	0.7137	0.8003	0.4335
	1776			glycerophosphorylcholine (GPC)	LC/MS pos early	15990	C00670	HMDB00086	71920		2.36	0.77	0.93	0.32	0.39	1.21	1.49	1.43	0.75	0.96	0.51	0.53	1.01	0.64	1.87	0.82					0.0034	0.0052	0.377	0.3347	0.7727	0.8871	0.0003	0.0004	0.0015	0.0022	0.5503	0.8345	0.1928	0.5289	0.1735	0.5607	0.3934	0.7458	0.9516
	1778			phosphoethanolamine	LC/MS neg	1600	C00346	HMDB00224	1015		0.75	0.88	0.61	1.17	0.82	0.7	1.87	1.7	1.26	0.91	0.68	0.74	0.94	2.34	1.83	1.94					0.2524	0.1306	0.822	0.4709	0.0521	0.5877	0.3555	0.1564	0.4055	0.1538	0.0834	0.7205	0.3012	0.5874	0.2119	0.5696	0.6025	0.7837	0.826
	1779			cytidine-5'-diphosphoethanolamine	LC/MS polar	34410	C00570	HMDB01564	123727		2.07	1.58	1.32	0.77	0.64	0.83	1.83	1.06	0.98	0.58	0.54	0.93	1.71	1.51	1.14	1.27					0.0762	0.0538	0.3662	0.3291	0.7659	0.8871	0.3703	0.1613	0.0403	0.0257	0.232	0.7603	0.1646	0.5138	0.8584	0.7598	0.7644	0.8101	0.2236
	1780			glycerophosphoethanolamine	LC/MS polar	37455	C01233	HMDB00114	123874		1.55	0.73	0.95	0.47	0.61	1.3	1.2	1.4	0.86	1.17	0.72	0.61	1.12	0.86	2.15	1.02					0.0383	0.0309	0.6192	0.4237	0.9011	0.9027	0.0117	0.0093	0.0288	0.0204	0.709	0.8488	0.5567	0.6611	0.2917	0.6103	0.73	0.8006	0.6368
	1781			glycerophosphoserine*	LC/MS pos early	57404			3081457		1.88	0.57	0.6	0.3	0.32	1.05	1.56	1.64	0.69	1.05	0.44	0.42	0.84	0.7	2.41	0.97					0.0106	0.0118	0.0447	0.1585	0.0255	0.4924	2.5839e-05	0.0001	1.1745e-05	8.9735e-05	0.805	0.8554	0.1066	0.4657	0.0736	0.4299	0.1168	0.5126	0.853
	1782			glycerophosphoinositol*	LC/MS polar	47155			167572		2.01	0.69	0.51	0.34	0.25	0.74	1.39	1.12	0.83	0.8	0.6	0.74	1.16	0.8	1.89	1.91					0.0042	0.006	0.5322	0.3895	0.0413	0.5877	0.0007	0.001	7.4562e-06	8.9735e-05	0.1472	0.7427	0.224	0.5472	0.6429	0.7037	0.4054	0.7458	0.447
	1783			trimethylamine N-oxide	LC/MS pos early	40406	C01104	HMDB00925	1145		0.62	0.78	0.43	1.24	0.69	0.55	2.66	1.77	1	0.66	0.38	0.57	0.14	0.59	0.31	0.32					0.7932	0.2918	0.78	0.4595	0.3433	0.8454	0.5886	0.2202	0.2285	0.0981	0.5018	0.8161	0.0198	0.2502	0.1236	0.5032	0.5034	0.7737	0.3982
	2338		Glycerolipid Metabolism	glycerol	LC/MS neg	15122	C00116	HMDB00131	753		2.11	0.83	0.99	0.39	0.47	1.19	2.8	1.32	0.87	0.47	0.31	0.66	0.89	1.18	1.41	0.79					0.0003	0.0011	0.4147	0.3545	0.9352	0.9027	2.7001e-05	0.0001	0.0004	0.0009	0.3704	0.7603	9.2049e-05	0.0194	0.1861	0.5607	0.4905	0.7737	0.0046
	2339			glycerol 3-phosphate	LC/MS pos early	43847	C00093	HMDB00126	754		2.71	0.98	0.86	0.36	0.32	0.89	1.94	0.84	1.39	0.43	0.71	1.66	0.77	0.55	0.66	1.23					0.002	0.0036	0.4119	0.354	0.6264	0.8871	0.0179	0.0132	0.0077	0.0074	0.7367	0.851	0.3529	0.6315	0.3913	0.6652	0.372	0.7458	0.0784
	2344			glycerophosphoglycerol	LC/MS polar	48857	C03274		439964		6.61	0.75	0.75	0.11	0.11	1	1.37	1.37	0.91	1	0.67	0.66	1.2	0.25	2.19	1.46					4.4205e-06	0.0001	0.4517	0.3649	0.4105	0.8649	3.7955e-07	1.711e-05	3.0091e-07	1.7572e-05	0.9432	0.8683	0.3876	0.6315	0.4793	0.6828	0.7058	0.798	0.8741
	2462		Sphingolipid Synthesis	sphinganine	LC/MS pos late	17769	C00836	HMDB00269	3126		1.29	0.56	1.07	0.43	0.83	1.91	1.64	0.57	1.37	0.35	0.84	2.39	1.25	1.58	1.28	1.59					0.3392	0.1581	0.161	0.2439	0.7476	0.8871	0.0214	0.0152	0.5237	0.1878	0.0874	0.7205	0.8851	0.7291	0.2101	0.5696	0.4131	0.7458	0.2659
	2464			sphingadienine	LC/MS pos late	57426			6449795		0.98	0.46	0.8	0.47	0.82	1.76	0.83	1.5	0.55	1.8	0.66	0.37	1.09	0.93	3.59	0.75					0.6974	0.2689	0.0286	0.1408	0.3204	0.8454	0.0111	0.009	0.1698	0.0806	0.2132	0.7603	0.6477	0.6738	0.3694	0.659	0.0547	0.3992	0.1789
	2465			phytosphingosine	LC/MS pos late	1510	C12144	HMDB04610	122121		0.68	0.31	0.73	0.45	1.08	2.38	0.44	0.36	0.34	0.82	0.78	0.95	3.06	1.96	3.56	1.42					0.9389	0.3272	0.2119	0.2673	0.5674	0.8871	0.1859	0.0939	0.517	0.1862	0.4929	0.807	0.8452	0.7179	0.252	0.5953	0.7207	0.8003	0.34
	2582		Sphingosines	sphingosine	LC/MS pos late	17747	C00319	HMDB00252	5353955		1	0.44	1.24	0.44	1.25	2.8	1.47	0.99	1.18	0.68	0.8	1.19	0.97	1.44	2.18	0.92					0.7198	0.2727	0.0491	0.1605	0.7365	0.8871	0.0216	0.0153	0.9823	0.2981	0.0228	0.5933	0.5648	0.6611	0.9195	0.7741	0.6867	0.798	0.6347
	2590			hexadecasphingosine (d16:1)*	LC/MS pos late	57428					4.09	0.61	1.46	0.15	0.36	2.39	1.32	0.97	0.64	0.74	0.48	0.66	1.43	0.46	2.28	0.63					0.0028	0.0046	0.2475	0.2795	0.7763	0.8871	8.9481e-05	0.0002	0.0061	0.0062	0.1522	0.76	0.988	0.7488	0.8593	0.7598	0.4171	0.7458	0.8711
	2591			heptadecasphingosine (d17:1)	LC/MS pos late	57427			5283557		3.47	0.81	4.26	0.23	1.23	5.28	0.81	0.64	0.55	0.79	0.68	0.86	2.7	0.63	2.15	0.35					0.0103	0.0117	0.7276	0.4541	0.1762	0.8072	0.0041	0.004	0.1959	0.0882	0.0917	0.7308	0.9473	0.7457	0.7905	0.7467	0.5261	0.7737	0.7401
	2592			eicosanoylsphingosine (d20:1)*	LC/MS pos late	57597					0.31	0.2	1.23	0.64	3.9	6.08	0.26	0.14	0.49	0.53	1.88	3.53	2.4	2	1.66	0.97					0.0174	0.0169	0.004	0.0734	0.7709	0.8871	0.5684	0.217	0.0345	0.023	0.0086	0.527	0.0715	0.4046	0.0072	0.2138	0.7165	0.8003	0.333
	2598		Mevalonate Metabolism	3-hydroxy-3-methylglutarate	LC/MS polar	531	C03761	HMDB00355	1662		1.46	0.51	0.97	0.35	0.66	1.9	1.11	2.24	0.92	2.02	0.83	0.41	1.38	1.04	6.01	1.3					0.121	0.0745	0.0747	0.1824	0.6911	0.8871	0.0015	0.0017	0.0541	0.032	0.1605	0.7603	0.8093	0.7084	0.0601	0.3962	0.9209	0.8253	0.0985
	2612		Sterol	desmosterol	LC/MS pos late	6065	C01802	HMDB02719	439577		0.51	0.42	1.17	0.83	2.28	2.76	1.49	1.11	0.79	0.75	0.53	0.71	1.35	3.9	3.54	0.91					0.1636	0.0938	0.1464	0.2419	0.9254	0.9027	0.9509	0.3099	0.138	0.0678	0.123	0.7378	0.9289	0.7402	0.9598	0.7866	0.9909	0.8436	0.889
	2613			cholesterol	LC/MS pos late	63	C00187	HMDB00067	11025495		1.67	0.74	1.25	0.45	0.75	1.67	1.12	0.9	0.79	0.8	0.7	0.87	1.42	0.96	1.72	0.9					0.0284	0.0245	0.2034	0.2614	0.4486	0.8649	0.001	0.0012	0.1392	0.068	0.0461	0.7068	0.4427	0.6493	0.8497	0.7598	0.3004	0.7314	0.3398
	2624			7-alpha-hydroxy-3-oxo-4-cholestenoate (7-Hoca)	LC/MS neg	36776	C17337	HMDB12458	3081085		0.85	0.85	0.92	1	1.09	1.09	1.74	1.49	1.62	0.85	0.93	1.09	0.52	1.07	0.91	0.91					0.8454	0.3053	0.9573	0.5186	0.7381	0.8871	0.8876	0.2942	0.5971	0.2069	0.6982	0.8461	0.4171	0.6315	0.7024	0.719	0.3694	0.7458	0.6657
	2637			4-cholesten-3-one	LC/MS pos late	38125	C00599	HMDB00921	91477		0.56	0.9	0.77	1.61	1.37	0.85	0.77	0.78	0.67	1.01	0.86	0.86	1.5	2.05	1.29	1.29					0.081	0.0569	0.87	0.4911	0.4455	0.8649	0.1118	0.0607	0.3139	0.1265	0.548	0.8345	0.3109	0.5963	0.4648	0.68	0.3322	0.745	0.7747
	2640			campesterol	LC/MS pos late	33997	C01789	HMDB02869	173183		4.08	0.76	1.36	0.19	0.33	1.78	1.41	1.42	0.65	1.01	0.46	0.46	0.68	0.24	1.28	0.33					0.0011	0.0024	0.508	0.3841	0.6377	0.8871	0.0001	0.0003	0.004	0.0045	0.26	0.7603	0.2801	0.5738	0.6759	0.7055	0.4642	0.7737	0.5044
	2657			7-hydroxycholesterol (alpha or beta)	LC/MS pos late	47890		HMDB06119	107722		0.99	0.82	1.88	0.83	1.91	2.3	0.41	0.11	0.12	0.28	0.28	1.03	22.91	9.6	3.19	1.43					0.9524	0.3297	0.7774	0.4595	0.3959	0.8649	0.8235	0.282	0.3639	0.1422	0.2599	0.7603	0.1963	0.5315	0.2071	0.5696	0.3395	0.745	0.9747
	2706		Progestin Steroids	20a-dihydroprogesterone	LC/MS pos late	39761	C04042	HMDB03069	92747		0.05	0.18	0.33	3.47	6.62	1.91	2.45	3.48	4.82	1.42	1.97	1.38	0.05	2.24	0.92	0.67					0.0016	0.0032	0.3634	0.3291	0.0705	0.6351	0.0184	0.0135	0.1367	0.0674	0.3534	0.7603	0.2091	0.5472	0.1263	0.5032	0.0259	0.2771	0.7772
	2711		Corticosteroids	corticosterone	LC/MS neg	5983	C02140	HMDB01547	5753		0.74	0.54	0.75	0.73	1.02	1.39	1.98	0.39	1.24	0.2	0.63	3.17	1.33	3.58	0.97	2.2					0.5948	0.2378	0.0276	0.1404	0.3409	0.8454	0.0878	0.05	0.6711	0.223	0.1937	0.7603	0.2504	0.5493	0.0186	0.2763	0.5172	0.7737	0.0008
	2808		Primary Bile Acid Metabolism	cholate	LC/MS neg	22842	C00695	HMDB00619	221493		7.96	0.33	0.33	0.04	0.04	1.01	0.28	0.06	0.11	0.22	0.41	1.88	2.32	0.08	0.43	0.8					0.0116	0.0125	0.0452	0.1585	0.1021	0.6884	2.9443e-05	0.0001	0.0001	0.0003	0.6956	0.8461	0.1779	0.5138	0.0044	0.1779	0.018	0.2243	0.1073
	2810			taurocholate	LC/MS neg	18497	C05122	HMDB00036	6675		5.12	0.15	0.08	0.03	0.02	0.54	0.12	0.02	0	0.14	0.03	0.22	12.2	0.29	1.43	0.57					0.2605	0.1341	0.0344	0.1516	0.0216	0.4915	0.0019	0.002	0.0011	0.0015	0.8418	0.8554	0.1985	0.5342	0.0808	0.4403	0.001	0.0453	0.6311
	2813			taurochenodeoxycholate	LC/MS neg	18494	C05465	HMDB00951	387316		15.5	0.2	0.1	0.01	0.01	0.52	0.31	0.01	0.01	0.03	0.02	0.61	17.89	0.35	0.85	1					0.0896	0.0617	0.1111	0.2146	0.0579	0.5877	0.0017	0.0018	0.0007	0.0011	0.7482	0.8554	0.1509	0.5026	0.0136	0.2763	0.0065	0.1179	0.2703
	2814			beta-muricholate	LC/MS neg	31885	C17726	HMDB00415	5283853		22.12	0.62	0.68	0.03	0.03	1.1	3.84	0.08	0.18	0.02	0.05	2.11	2.52	0.44	0.34	0.66					0.0042	0.006	0.1387	0.2354	0.4977	0.8649	4.9826e-05	0.0001	0.0006	0.0011	0.4134	0.7603	0.8463	0.7179	0.0267	0.3082	0.1885	0.6487	0.0416
	2817			tauro-beta-muricholate	LC/MS neg	33983		HMDB00932	168408		9.61	0.2	0.04	0.02	0	0.22	0.19	0.01	0	0.06	0.01	0.16	15.34	0.3	0.82	0.58					0.193	0.105	0.0677	0.1742	0.0159	0.4855	0.0027	0.0027	0.0004	0.0009	0.5265	0.8193	0.4804	0.6496	0.1984	0.563	0.0033	0.0828	0.5549
	2828		Secondary Bile Acid Metabolism	deoxycholate	LC/MS neg	1114	C04483	HMDB00626	222528		0.16	0.14	0.12	0.84	0.72	0.85	0.55	0.24	0.12	0.43	0.22	0.5	1.41	4.81	2.48	1.46					0.0126	0.0131	0.005	0.0736	0.0016	0.2089	0.7195	0.2554	0.4445	0.1646	0.6836	0.8461	0.1366	0.4901	0.0497	0.3894	0.0011	0.0453	0.6162
	2831			taurodeoxycholate	LC/MS neg	12261	C05463	HMDB00896	2733768		11.57	0.18	0.12	0.02	0.01	0.69	0.06	0.01	0.01	0.23	0.13	0.57	22.19	0.11	1.65	1.37					0.1397	0.0832	0.0706	0.1785	0.0463	0.5877	0.0017	0.0019	0.001	0.0015	0.8431	0.8554	0.0383	0.3265	0.0188	0.2763	0.003	0.0777	0.7605
	2847			tauroursodeoxycholate	LC/MS neg	39378		HMDB00874	9848818		20.33	0.18	0.09	0.01	0	0.54	0.15	0.01	0	0.04	0.02	0.61	25.92	0.19	0.89	1					0.0595	0.0436	0.1536	0.2439	0.0885	0.6574	0.0016	0.0017	0.0007	0.0011	0.7722	0.8554	0.2794	0.5738	0.0403	0.3808	0.019	0.2306	0.3124
	3437	Nucleotide	Purine Metabolism, (Hypo)Xanthine/Inosine containing	AICA ribonucleotide	LC/MS pos early	38325	C04677	HMDB01517	65110		1.59	0.92	0.55	0.58	0.34	0.6	1.58	1.3	0.97	0.82	0.61	0.75	0.86	0.85	1.21	1.52					0.1226	0.0747	0.9405	0.5145	0.1931	0.8271	0.1409	0.0739	0.006	0.0062	0.1696	0.7603	0.5783	0.6632	0.6153	0.7037	0.8669	0.8189	0.9573
	3440			inosine 5'-monophosphate (IMP)	LC/MS polar	2133	C00130	HMDB00175	8582		2.14	2.72	1.95	1.27	0.91	0.72	0.55	0.16	0.33	0.29	0.61	2.06	4.67	1.19	0.28	0.79					0.0273	0.0238	0.0452	0.1585	0.7557	0.8871	0.8241	0.282	0.0549	0.0322	0.0871	0.7205	0.8129	0.7084	0.1179	0.5032	0.1916	0.6487	0.0738
	3441			inosine	LC/MS neg	1123	C00294	HMDB00195	6021		3.54	1.01	1.06	0.28	0.3	1.05	1.22	1.1	0.91	0.9	0.75	0.83	1.16	0.4	1.28	1					0.0002	0.0009	0.9607	0.5186	0.8218	0.8989	0.0003	0.0004	0.0005	0.0009	0.8603	0.8554	0.5314	0.659	0.7917	0.7467	0.8827	0.8189	0.7167
	3442			hypoxanthine	LC/MS neg	3127	C00262	HMDB00157	790		1.45	0.79	0.61	0.55	0.42	0.78	1.23	1.32	1.06	1.07	0.86	0.8	0.95	0.81	1.59	1.64					0.0437	0.0335	0.4418	0.3619	0.1136	0.6884	0.0067	0.006	0.0006	0.0011	0.4055	0.7603	0.4355	0.6455	0.3353	0.6447	0.9822	0.8436	0.8522
	3443			xanthine	LC/MS neg	3147	C00385	HMDB00292	1188		1.2	0.65	0.69	0.55	0.58	1.06	1.3	1.23	1.09	0.95	0.84	0.88	0.85	0.93	1.61	1.35					0.1334	0.08	0.0543	0.1673	0.0932	0.6574	0.0011	0.0013	0.0023	0.003	0.7943	0.8554	0.1812	0.5138	0.3143	0.628	0.7058	0.798	0.7343
	3444			xanthosine 5'-monophosphate (xmp)	LC/MS neg	12024	C00655	HMDB01554	73323		2.89	1.82	1.32	0.63	0.46	0.72	2.78	1.13	1.6	0.4	0.58	1.42	1.13	1.09	0.7	1.37					0.0026	0.0044	0.0722	0.1793	0.3877	0.8649	0.181	0.0917	0.0246	0.0182	0.3361	0.7603	0.0856	0.4413	0.6222	0.7037	0.5187	0.7737	0.2127
	3445			xanthosine	LC/MS pos early	15136	C01762	HMDB00299	64959		7.98	0.45	0.39	0.06	0.05	0.87	4.02	1.43	0.76	0.36	0.19	0.53	0.61	0.31	1.95	1.2					0.0004	0.0013	0.2336	0.2756	0.036	0.583	1.0627e-05	7.7893e-05	4.8175e-07	1.9369e-05	0.3427	0.7603	0.0362	0.3256	0.3532	0.6538	0.4866	0.7737	0.2266
	3448			N1-methylinosine	LC/MS pos early	48351		HMDB02721	65095		1.03	0.57	1.38	0.56	1.35	2.41	1.09	0.64	0.74	0.59	0.68	1.15	1.54	1.64	1.73	0.82					0.7038	0.2693	0.2135	0.2673	0.8048	0.8942	0.1074	0.0589	0.8939	0.2793	0.1382	0.7378	0.9546	0.7458	0.3053	0.6221	0.4054	0.7458	0.2797
	3449			2'-deoxyinosine	LC/MS neg	15076	C05512	HMDB00071	65058		0.82	0.44	0.63	0.53	0.76	1.44	0.85	1.22	0.81	1.44	0.96	0.67	0.93	0.96	2.6	1.21					0.9197	0.3232	0.0919	0.1941	0.1526	0.7532	0.075	0.0436	0.1267	0.0634	0.7898	0.8554	0.6736	0.6741	0.9514	0.7841	0.7241	0.8003	0.6299
	3451			urate	LC/MS neg	1604	C00366	HMDB00289	1175		0.51	0.47	0.68	0.91	1.32	1.44	1.05	1.19	0.91	1.13	0.86	0.76	0.68	1.39	1.72	0.91					0.0016	0.0032	0.0382	0.1548	0.2624	0.8454	0.2203	0.1077	0.0299	0.0206	0.3203	0.7603	0.8514	0.7184	0.6513	0.7054	0.7069	0.798	0.5232
	3452			uric acid ribonucleoside*	LC/MS neg	62102			164933		2.61	0.3	0.38	0.12	0.15	1.26	1.1	0.98	0.42	0.9	0.38	0.42	1.24	0.52	4.03	1.36					0.0384	0.0309	0.0017	0.0561	0.006	0.284	2.3506e-06	4.1185e-05	1.039e-05	8.9735e-05	0.6459	0.8461	0.534	0.659	0.4585	0.68	0.1895	0.6487	0.9041
	3453			allantoin	LC/MS polar	1107	C02350	HMDB00462	204		2.92	0.71	1.19	0.24	0.41	1.69	1.01	0.43	0.77	0.42	0.76	1.8	1.73	0.6	1.05	1.11					0.0015	0.0031	0.2313	0.2756	0.758	0.8871	3.7845e-05	0.0001	0.0035	0.0041	0.1349	0.7378	0.7181	0.6877	0.016	0.2763	0.3985	0.7458	0.0375
	3458		Purine Metabolism, Adenine containing	adenosine 5'-diphosphate (ADP)	LC/MS neg	3108	C00008	HMDB01341	6022		1.92	1.8	1.23	0.94	0.64	0.68	1.23	0.93	1.28	0.76	1.04	1.37	1.73	1.11	0.9	1.8					0.0298	0.0251	0.1174	0.2183	0.7789	0.8871	0.518	0.2044	0.0558	0.0326	0.1951	0.7603	0.5904	0.6632	0.8023	0.7535	0.8798	0.8189	0.4315
	3459			adenosine 5'-monophosphate (AMP)	LC/MS pos early	32342	C00020	HMDB00045	6083		7.52	2.72	2.17	0.36	0.29	0.8	3.2	1.51	1.75	0.47	0.55	1.16	2.06	0.88	1.14	1.66					1.5725e-05	0.0002	0.0144	0.1078	0.088	0.6574	0.0237	0.0167	0.003	0.0036	0.4229	0.7603	0.0103	0.1823	0.2718	0.6098	0.4337	0.7558	0.1225
	3460			adenosine 3'-monophosphate (3'-AMP)	LC/MS neg	35142	C01367	HMDB03540	41211		0.91	0.46	0.69	0.51	0.77	1.5	3.59	0.66	0.51	0.18	0.14	0.78	1.52	6.01	2.15	1.12					0.7075	0.27	0.0862	0.1932	0.2154	0.8337	0.175	0.0895	0.3836	0.1479	0.6199	0.8455	0.2376	0.5472	0.5115	0.6828	0.2379	0.688	0.0701
	3461			adenosine 2'-monophosphate (2'-AMP)	LC/MS neg	36815	C00946	HMDB11617	94136		1.37	0.58	0.37	0.42	0.27	0.65	1.1	0.91	0.65	0.82	0.59	0.72	1.49	1.2	2.35	2.6					0.4009	0.1781	0.0483	0.1605	0.0057	0.284	0.0063	0.0057	0.0005	0.001	0.3825	0.7603	0.3018	0.5874	0.521	0.6828	0.4673	0.7737	0.6923
	3462			adenosine 3',5'-cyclic monophosphate (cAMP)	LC/MS neg	2831	C00575	HMDB00058	6076		1.13	0.78	0.94	0.69	0.83	1.2	0.98	0.91	0.72	0.93	0.73	0.78	1.17	1.01	1.36	0.89					0.6478	0.2518	0.5613	0.3989	0.7006	0.8871	0.3018	0.1374	0.4017	0.1528	0.8436	0.8554	0.9951	0.7488	0.911	0.7741	0.5524	0.7773	0.9061
	3463			adenosine-2',3'-cyclic monophosphate	LC/MS neg	37467	C02353	HMDB11616	2024		0.49	0.34	1.42	0.7	2.91	4.17	0.36	0.22	0.33	0.61	0.92	1.51	1.72	1.26	1.09	0.4					0.4942	0.2076	0.178	0.2515	0.834	0.8989	0.4998	0.1996	0.6345	0.216	0.2529	0.7603	0.4423	0.6493	0.2192	0.5696	0.4092	0.7458	0.6393
	3464			adenosine 3',5'-diphosphate	LC/MS neg	15691	C00054	HMDB00061	159296		2.18	0.78	0.6	0.36	0.27	0.77	1.52	0.9	0.69	0.59	0.45	0.77	1.33	0.93	1.53	1.53					0.0197	0.0185	0.2488	0.2797	0.1176	0.6884	0.0009	0.0011	0.0002	0.0006	0.67	0.8461	0.4044	0.6315	0.81	0.7543	0.3116	0.7314	0.2846
	3465			adenylosuccinate	LC/MS neg	18360	C03794	HMDB00536	195		20.5	4.02	3.6	0.2	0.18	0.89	9.1	2.6	2.92	0.29	0.32	1.12	2.66	1.18	1.71	2.16					9.8211e-06	0.0001	0.0214	0.1319	0.0993	0.6853	0.0111	0.009	0.0017	0.0023	0.4838	0.8018	0.0014	0.0874	0.1367	0.5104	0.2276	0.6744	0.0641
	3466			adenosine	LC/MS pos early	555	C00212	HMDB00050	60961		4.01	2.52	2.64	0.63	0.66	1.05	1.15	1.04	1.5	0.91	1.31	1.44	1.87	0.54	0.78	1.06					0.002	0.0036	0.0712	0.1785	0.0424	0.5877	0.1541	0.0801	0.2338	0.0992	0.8086	0.8554	0.6375	0.6738	0.5804	0.6936	0.1362	0.5716	0.9346
	3467			adenine	LC/MS pos early	554	C00147	HMDB00034	190		16.67	1.59	1.81	0.1	0.11	1.13	2.78	1.3	1.59	0.47	0.57	1.22	2	0.33	1.63	1.76					1.2862e-05	0.0002	0.3251	0.3133	0.4058	0.8649	0.0003	0.0004	0.0002	0.0004	0.8768	0.8554	0.1049	0.4657	0.4154	0.6652	0.5914	0.7812	0.4078
	3472			N1-methyladenosine	LC/MS pos early	15650	C02494	HMDB03331	27476		2.17	0.58	1.13	0.27	0.52	1.96	1.34	1.1	1.03	0.82	0.76	0.93	1.18	0.73	2.24	1.07					0.0154	0.0154	0.0942	0.1962	0.88	0.9027	0.0001	0.0003	0.0222	0.0168	0.0693	0.7068	0.5078	0.65	0.8373	0.7598	0.8751	0.8189	0.6469
	3473			N6-methyladenosine	LC/MS pos early	37114		HMDB04044	1869		1.34	0.3	0.35	0.22	0.26	1.2	1.05	1.51	1.05	1.44	1.01	0.7	0.59	0.46	3	1.75					0.1584	0.0913	0.0412	0.1583	0.0736	0.6351	0.001	0.0013	0.0022	0.0029	0.7872	0.8554	0.6426	0.6738	0.256	0.5954	0.6427	0.798	0.4975
	3482			N6-carbamoylthreonyladenosine	LC/MS neg	35157		HMDB41623	161466		1.48	0.5	0.86	0.34	0.58	1.7	1.43	1.01	0.82	0.71	0.57	0.81	0.97	0.94	1.95	0.92					0.1333	0.08	0.1481	0.242	0.51	0.8687	0.0045	0.0043	0.0339	0.0226	0.4229	0.7603	0.6619	0.6741	0.8605	0.7598	0.4872	0.7737	0.5405
	3485			2'-deoxyadenosine 5'-monophosphate	LC/MS neg	46333	C00360	HMDB00905	12599		1.29	1.03	0.86	0.8	0.66	0.83	0.93	1.02	0.65	1.09	0.69	0.64	2.19	1.58	2.16	1.65					0.5072	0.211	0.9036	0.5036	0.8974	0.9027	0.5872	0.2202	0.429	0.1603	0.8025	0.8554	0.7346	0.6911	0.8973	0.774	0.6935	0.798	0.64
	3487			2'-deoxyadenosine	LC/MS pos early	1553	C00559	HMDB00101	13730		0.42	0.62	1.44	1.46	3.42	2.34	0.43	0.48	0.84	1.11	1.94	1.75	1.21	1.24	0.94	0.7					0.1808	0.1	0.421	0.3556	0.7681	0.8871	0.5861	0.2202	0.105	0.0548	0.2737	0.7603	0.0622	0.3701	0.0813	0.4403	0.8228	0.8152	0.8972
	3492			N6-succinyladenosine	LC/MS neg	48130		HMDB00912	165243		2.43	1.64	2.27	0.68	0.93	1.38	3.4	0.66	1.93	0.2	0.57	2.91	1.57	2.2	0.63	1.34					0.0456	0.0345	0.3653	0.3291	0.3336	0.8454	0.258	0.122	0.2846	0.1172	0.9501	0.8683	0.0391	0.3265	0.5875	0.6959	0.4886	0.7737	0.0106
	3495		Purine Metabolism, Guanine containing	guanosine 5'- monophosphate (5'-GMP)	LC/MS pos early	2849	C00144	HMDB01397	6804		5.56	2.63	2.64	0.47	0.48	1	3.57	1.46	1.75	0.41	0.49	1.2	2.1	1.35	1.16	1.39					6.026e-05	0.0004	0.0092	0.0974	0.0207	0.4915	0.0881	0.05	0.0444	0.0276	0.745	0.8554	0.0097	0.1823	0.3551	0.6539	0.5228	0.7737	0.0827
	3496			guanosine 3'-monophosphate (3'-GMP)	LC/MS neg	39786			3522		0.69	0.33	0.89	0.48	1.29	2.69	4.85	0.54	0.42	0.11	0.09	0.79	1.61	11.29	2.63	0.77					0.192	0.1047	0.1384	0.2354	0.5798	0.8871	0.8544	0.288	0.4465	0.1646	0.346	0.7603	0.9335	0.7402	0.6284	0.7037	0.1714	0.6415	0.6885
	3500			guanosine	LC/MS pos early	1573	C00387	HMDB00133	6802		2.07	1.58	2.06	0.76	0.99	1.3	0.89	0.86	1.09	0.97	1.23	1.27	1.63	0.7	0.89	0.86					0.0087	0.0104	0.1576	0.2439	0.0537	0.5877	0.1945	0.0966	0.445	0.1646	0.5868	0.8385	0.7053	0.6877	0.6717	0.7054	0.7165	0.8003	0.9634
	3501			guanine	LC/MS pos early	32352	C00242	HMDB00132	764		2.18	1.48	1.77	0.68	0.81	1.19	1.37	1.56	1.41	1.14	1.04	0.91	0.94	0.59	0.99	0.75					0.0115	0.0124	0.2822	0.292	0.1982	0.8337	0.1272	0.0679	0.188	0.0857	0.8284	0.8554	0.1801	0.5138	0.1015	0.4851	0.1513	0.5937	0.7568
	3503			7-methylguanine	LC/MS pos early	35114	C02242	HMDB00897	11361		1.17	0.47	0.9	0.4	0.78	1.94	0.76	0.61	0.53	0.8	0.7	0.87	1.51	0.99	1.98	0.89					0.3346	0.1567	0.0119	0.103	0.7142	0.8871	0.0008	0.0011	0.1861	0.0853	0.0289	0.6606	0.3835	0.6315	0.199	0.563	0.0772	0.4553	0.6731
	3509			N2,N2-dimethylguanosine	LC/MS pos early	35137		HMDB04824	92919		0.81	0.51	1.43	0.63	1.77	2.82	1.33	1.42	1	1.07	0.75	0.7	0.95	1.56	2.67	0.66					0.7666	0.2867	0.1986	0.2609	0.7749	0.8871	0.3193	0.1443	0.9914	0.2997	0.3141	0.7603	0.8345	0.715	0.3949	0.6652	0.918	0.8252	0.5195
	3517			2'-deoxyguanosine	LC/MS neg	1411	C00330	HMDB00085	187790		0.48	0.5	1.01	1.05	2.12	2.02	0.6	0.84	0.99	1.4	1.65	1.17	0.85	1.07	1.43	0.83					0.0229	0.0207	0.1054	0.2077	0.7699	0.8871	0.4818	0.194	0.0447	0.0276	0.1807	0.7603	0.1433	0.4971	0.318	0.6293	0.9476	0.8351	0.6327
	3522		Pyrimidine Metabolism, Orotate containing	orotate	LC/MS polar	1505	C00295	HMDB00226	967		0.56	0.76	0.97	1.36	1.74	1.28	1.53	1.16	1.36	0.75	0.89	1.18	1.06	2.9	1.6	1.48					0.5377	0.2192	0.7709	0.4595	0.9038	0.9027	0.7443	0.2616	0.6198	0.2124	0.8647	0.8554	0.8124	0.7084	0.8589	0.7598	0.944	0.8336	0.9524
	3524			orotidine	LC/MS polar	35172		HMDB00788	92751		0.52	0.93	0.88	1.8	1.7	0.95	0.96	0.88	1.15	0.92	1.2	1.31	1.13	2.09	1.07	1.47					0.0151	0.0153	0.7145	0.4523	0.7675	0.8871	0.0359	0.0239	0.0305	0.0208	0.9439	0.8683	0.8242	0.7093	0.6654	0.7054	0.6229	0.7912	0.8332
	3527		Pyrimidine Metabolism, Uracil containing	uridine 5'-triphosphate (UTP)	LC/MS neg	33448	C00075	HMDB00285	6133		0.77	1.76	0.98	2.29	1.28	0.56	0.65	0.72	0.95	1.1	1.46	1.32	1.42	1.22	0.59	1.39					0.9414	0.3274	0.2226	0.2693	0.9032	0.9027	0.251	0.1194	0.9617	0.2934	0.2709	0.7603	0.5314	0.659	0.4418	0.6652	0.2421	0.6956	0.885
	3528			uridine 5'-diphosphate (UDP)	LC/MS neg	5345	C00015	HMDB00295	6031		2.61	2.12	1.46	0.81	0.56	0.69	1.62	1.52	1.43	0.94	0.88	0.94	1.76	1.09	1.26	1.72					0.0246	0.0219	0.1892	0.2554	0.6546	0.8871	0.3231	0.1457	0.0667	0.0378	0.3815	0.7603	0.0995	0.4657	0.209	0.5696	0.4284	0.7522	0.6845
	3529			uridine 5'-monophosphate (UMP)	LC/MS polar	2856	C00105	HMDB00288	6030		6.02	2.75	2.45	0.46	0.41	0.89	3.37	1.29	1.68	0.38	0.5	1.3	2.22	1.24	1.04	1.52					0.0004	0.0011	0.023	0.1342	0.0474	0.5877	0.1337	0.0709	0.0718	0.0398	0.7515	0.8554	0.022	0.2502	0.4619	0.68	0.2995	0.7314	0.1089
	3531			uridine 3'-monophosphate (3'-UMP)	LC/MS neg	39764	C01368		101543		1.03	0.33	4.58	0.32	4.46	13.88	5.02	0.48	0.95	0.1	0.19	1.98	1.82	8.89	2.64	0.38					0.442	0.1907	0.1394	0.2354	0.4571	0.8649	0.4686	0.192	0.1345	0.0667	0.0294	0.6606	0.8409	0.7161	0.5122	0.6828	0.6568	0.798	0.3931
	3533			uridine-2',3'-cyclic monophosphate	LC/MS neg	37137	C02355	HMDB11640	439715		0.98	0.79	1.61	0.8	1.64	2.04	2.06	0.45	1.05	0.22	0.51	2.33	1.14	2.39	0.65	0.75					0.5958	0.2378	0.4416	0.3619	0.6641	0.8871	0.8097	0.2802	0.3368	0.1341	0.2316	0.7603	0.7463	0.6963	0.1156	0.5032	0.5474	0.7773	0.0602
	3534			uridine	LC/MS neg	606	C00299	HMDB00296	6029		1.91	0.63	0.92	0.33	0.48	1.46	1.93	1.23	1.32	0.64	0.68	1.07	0.74	0.74	1.43	1.05					0.0154	0.0154	0.1291	0.2286	0.7794	0.8871	0.0002	0.0004	0.0076	0.0074	0.2123	0.7603	0.0284	0.2854	0.5064	0.6828	0.238	0.688	0.1166
	3535			uracil	LC/MS polar	605	C00106	HMDB00300	1174		0.54	0.5	0.57	0.93	1.06	1.14	1.1	1.58	1.08	1.44	0.98	0.68	0.95	1.94	3.01	1.8					0.0223	0.0204	0.0891	0.1938	0.1263	0.6884	0.5292	0.2065	0.4194	0.1578	0.8572	0.8554	0.8782	0.7268	0.1785	0.5607	0.7869	0.8134	0.2314
	3536			pseudouridine	LC/MS neg	33442	C02067	HMDB00767	15047		0.86	0.58	0.79	0.67	0.92	1.37	0.87	0.95	0.95	1.09	1.09	1.01	1.2	1.22	1.96	1.44					0.8512	0.3059	0.0242	0.1358	0.31	0.8454	0.0373	0.0247	0.4062	0.1538	0.1962	0.7603	0.4996	0.6496	0.8389	0.7598	0.7844	0.8134	0.6362
	3537			5,6-dihydrouridine	LC/MS neg	61833			94312		0.95	0.48	0.66	0.51	0.69	1.36	0.9	0.87	0.91	0.97	1.01	1.04	1.18	1.11	2.11	1.62					0.6875	0.2656	0.0166	0.1168	0.1608	0.771	0.0059	0.0054	0.0741	0.0407	0.2902	0.7603	0.669	0.6741	0.6447	0.7037	0.5909	0.7812	0.9731
	3538			2'-O-methyluridine	LC/MS neg	57655			102212		3.51	0.62	1.4	0.18	0.4	2.25	2.73	1.42	1.16	0.52	0.42	0.82	1.04	0.81	2.38	0.86					0.0027	0.0045	0.3141	0.3106	0.8864	0.9027	0.0001	0.0003	0.0018	0.0024	0.3864	0.7603	0.0415	0.3362	0.4083	0.6652	0.8551	0.8189	0.2113
	3539			5-methyluridine (ribothymidine)	LC/MS neg	35136		HMDB00884	445408		1.25	0.3	0.4	0.24	0.32	1.31	0.67	1.17	0.48	1.74	0.71	0.41	1.17	0.63	4.52	1.41					0.1966	0.1061	0.0337	0.1516	0.0717	0.6351	0.0011	0.0013	0.003	0.0036	0.7285	0.851	0.6345	0.6738	0.6119	0.7037	0.2853	0.7184	0.3279
	3546			5,6-dihydrouracil	LC/MS neg	1559	C00429	HMDB00076	649		1.09	0.74	0.48	0.68	0.44	0.65	0.83	0.79	0.68	0.96	0.82	0.85	1.22	0.93	1.31	1.72					0.631	0.2463	0.7903	0.463	0.233	0.8454	0.8298	0.283	0.4715	0.172	0.3512	0.7603	0.9505	0.7458	0.517	0.6828	0.7294	0.8006	0.478
	3550			2'-deoxyuridine	LC/MS neg	52602	C00526	HMDB00012	13712		0.37	0.34	0.54	0.94	1.47	1.57	0.78	1.35	0.79	1.74	1.02	0.58	0.81	1.71	3.17	1.18					0.002	0.0036	0.0106	0.0984	0.1569	0.7593	0.5317	0.2066	0.0691	0.0388	0.2233	0.7603	0.5984	0.6636	0.516	0.6828	0.5218	0.7737	0.2425
	3553			3-ureidopropionate	LC/MS pos early	3155	C02642	HMDB00026	111		1.02	0.29	0.45	0.29	0.45	1.55	0.41	0.32	0.27	0.77	0.66	0.86	2.4	0.98	2.6	1.44					0.7673	0.2867	0.0002	0.0111	0.0249	0.4924	7.5391e-05	0.0002	0.0121	0.0107	0.0821	0.7205	0.0018	0.0874	0.0008	0.1143	0.0003	0.0203	0.7731
	3554			beta-alanine	LC/MS pos early	55	C00099	HMDB00056	239		4.86	1.09	0.95	0.22	0.19	0.87	2.23	0.94	0.98	0.42	0.44	1.05	1.46	0.67	1.26	1.52					3.8873e-05	0.0003	0.9945	0.525	0.7644	0.8871	3.9727e-05	0.0001	1.4983e-05	9.1556e-05	0.7592	0.8554	0.1495	0.5026	0.8211	0.7571	0.8603	0.8189	0.0974
	3555			N-acetyl-beta-alanine	LC/MS polar	37432	C01073		76406		0.61	0.98	1.26	1.61	2.07	1.28	0.9	0.54	1.26	0.6	1.41	2.35	1.48	2.17	0.81	1.48					0.095	0.064	0.7084	0.4515	0.7108	0.8871	0.19	0.0949	0.0436	0.0272	0.4576	0.7775	0.4844	0.6496	0.2131	0.5696	0.813	0.8152	0.579
	3557			uridine 2'-monophosphate (2'-UMP)*	LC/MS neg	52444					0.83	0.13	1.81	0.16	2.19	13.67	8.79	0.56	1.71	0.06	0.19	3.07	1.13	11.97	4.74	1.06					0.1182	0.0734	0.0136	0.1058	0.5209	0.8729	0.3306	0.1483	0.3483	0.1371	0.0602	0.7068	0.548	0.6611	0.495	0.6828	0.6627	0.798	0.2029
	3559		Pyrimidine Metabolism, Cytidine containing	cytidine diphosphate	LC/MS neg	2841	C00112	HMDB01546	6132		1.09	1.96	1.14	1.8	1.04	0.58	1.62	1.9	2.26	1.17	1.39	1.19	1.06	1.57	1.02	2.1					0.9207	0.3232	0.2152	0.2674	0.7469	0.8871	0.2533	0.1202	0.8233	0.264	0.3558	0.7603	0.3756	0.6315	0.5266	0.6828	0.1501	0.5937	0.7983
	3560			cytidine 5'-monophosphate (5'-CMP)	LC/MS pos early	2372	C00055	HMDB00095	6131		2.75	0.86	1	0.31	0.36	1.16	1.15	1.11	0.92	0.97	0.81	0.83	1.38	0.57	1.78	1.28					0.003	0.0047	0.6928	0.4482	0.9116	0.9027	0.001	0.0012	0.0022	0.0029	0.7762	0.8554	0.8585	0.7201	0.6594	0.7054	0.8468	0.8189	0.7927
	3561			cytidine 3'-monophosphate (3'-CMP)	LC/MS polar	2959	C05822		66535		1.35	1.13	2.04	0.83	1.51	1.81	3.68	0.54	1.16	0.15	0.31	2.15	1.41	3.84	0.68	0.8					0.8524	0.3059	0.9806	0.5249	0.6534	0.8871	0.8334	0.283	0.526	0.1882	0.6709	0.8461	0.6026	0.6636	0.3021	0.6213	0.5638	0.7773	0.1242
	3563			cytidine 2',3'-cyclic monophosphate	LC/MS neg	37465	C02354	HMDB11691	417654		0.66	0.43	1.31	0.66	2	3.04	9.54	0.48	1.58	0.05	0.17	3.28	0.8	11.68	0.9	0.97					0.785	0.2909	0.1826	0.2515	0.8757	0.9027	0.2858	0.132	0.668	0.223	0.1379	0.7378	0.6508	0.6738	0.1205	0.5032	0.7745	0.8134	0.0477
	3564			cytidine	LC/MS pos early	514	C00475	HMDB00089	6175		0.57	0.66	1.01	1.15	1.77	1.54	1.51	1.09	1.31	0.72	0.87	1.2	0.85	2.24	1.4	1.09					0.0118	0.0125	0.3097	0.3082	0.8287	0.8989	0.1154	0.0621	0.0201	0.0158	0.422	0.7603	0.6064	0.6636	0.9126	0.7741	0.4825	0.7737	0.6848
	3565			cytosine	LC/MS pos early	573	C00380	HMDB00630	597		1.61	0.92	1.13	0.57	0.71	1.23	0.63	0.93	0.74	1.47	1.18	0.8	1.26	0.5	1.27	0.83					0.1217	0.0746	0.7688	0.4595	0.7927	0.8924	0.0678	0.0405	0.1954	0.0882	0.5783	0.8385	0.0613	0.37	0.5122	0.6828	0.227	0.6744	0.2135
	3566			3-methylcytidine	LC/MS pos early	35132			159649		1.25	0.2	0.56	0.16	0.45	2.74	0.79	0.78	0.83	0.98	1.05	1.07	1.08	0.68	4.1	1.6					0.1677	0.0953	0.006	0.0796	0.2453	0.8454	0.0001	0.0002	0.0135	0.0116	0.0931	0.7308	0.5042	0.6496	0.3474	0.6484	0.6258	0.7912	0.7834
	3567			5-methylcytidine	LC/MS pos early	22119		HMDB00982	92918		0.98	0.61	1.06	0.62	1.08	1.73	1.78	1.02	1.06	0.58	0.6	1.03	1.11	2.02	1.87	1.11					0.5353	0.2192	0.5177	0.3851	0.8843	0.9027	0.9783	0.3167	0.6347	0.216	0.6155	0.8453	0.4688	0.6496	0.9119	0.7741	0.9064	0.8244	0.4044
	3568			N4-acetylcytidine	LC/MS pos early	35130		HMDB05923	107461		0.78	0.3	0.37	0.38	0.48	1.24	0.68	0.72	0.52	1.05	0.76	0.72	1.01	0.88	2.41	1.4					0.4174	0.1832	0.1143	0.2165	0.1415	0.7336	0.0195	0.014	0.0256	0.0186	0.9095	0.8647	0.4607	0.6496	0.5215	0.6828	0.1105	0.4942	0.9224
	3572			2'-deoxycytidine 5'-monophosphate	LC/MS pos early	533	C00239	HMDB01202	13945		1.23	0.67	0.77	0.55	0.62	1.14	0.94	0.95	0.75	1.02	0.8	0.79	1.53	1.16	2.15	1.49					0.3371	0.1575	0.2531	0.2813	0.7298	0.8871	0.0393	0.0255	0.1945	0.088	0.4217	0.7603	0.8115	0.7084	0.9661	0.7873	0.5681	0.7773	0.8445
	3574			2'-deoxycytidine	LC/MS neg	15949	C00881	HMDB00014	13711		0.42	0.48	0.84	1.14	1.98	1.74	0.96	0.5	0.65	0.52	0.67	1.28	1.17	2.66	1.22	0.9					0.0035	0.0052	0.1625	0.2439	0.7433	0.8871	0.0996	0.0551	0.0083	0.0077	0.2809	0.7603	0.5834	0.6632	0.2393	0.584	0.5963	0.783	0.5247
	3575			2'-O-methylcytidine	LC/MS pos early	57554			150971		3.31	1.05	2.47	0.32	0.75	2.36	2.23	1.39	1.09	0.63	0.49	0.79	1.8	1.21	2.39	0.8					0.0018	0.0035	0.7675	0.4595	0.1882	0.8271	0.0042	0.004	0.0528	0.0316	0.304	0.7603	0.2146	0.5472	0.428	0.6652	0.9547	0.8367	0.6478
	3576			5-methyl-2'-deoxycytidine	LC/MS pos early	38159	C03592	HMDB02224	440055		0.82	0.29	0.6	0.36	0.73	2.04	0.85	0.48	0.44	0.57	0.51	0.91	1.2	1.24	1.97	0.88					0.953	0.3297	0.0063	0.0796	0.2292	0.8454	0.0074	0.0065	0.2523	0.1064	0.1042	0.7342	0.7632	0.6975	0.1048	0.4935	0.089	0.4637	0.1826
	3579			cytidine 2'-monophosphate (2'-CMP)	LC/MS polar	57769					1.17	0.59	2.22	0.51	1.89	3.73	6.51	0.51	1.95	0.08	0.3	3.86	1.23	6.82	1.05	1.08					0.6217	0.2443	0.3592	0.3291	0.9527	0.9027	0.6693	0.2433	0.6641	0.2226	0.3907	0.7603	0.5846	0.6632	0.3782	0.6652	0.5228	0.7737	0.157
	3585		Pyrimidine Metabolism, Thymine containing	thymidine	LC/MS neg	2183	C00214	HMDB00273	5789		0.39	0.46	0.79	1.16	2	1.72	1.3	1.37	0.9	1.05	0.69	0.66	0.79	2.61	2.36	0.9					0.0012	0.0026	0.1837	0.2515	0.6387	0.8871	0.0386	0.0252	0.0044	0.0048	0.3844	0.7603	0.9834	0.7488	0.6824	0.7066	0.9617	0.8404	0.6977
	3586			thymine	LC/MS neg	604	C00178	HMDB00262	1135		0.43	0.26	0.34	0.61	0.78	1.29	0.48	1.28	0.34	2.67	0.71	0.26	1.55	1.71	7.54	1.55					0.0703	0.0501	0.0344	0.1516	0.0572	0.5877	0.7431	0.2616	0.9223	0.2871	0.8178	0.8554	0.2312	0.5472	0.5548	0.6897	0.0807	0.461	0.0776
	3587			5,6-dihydrothymine	LC/MS neg	1418	C00906	HMDB00079	93556		1.07	0.61	0.6	0.57	0.57	0.99	0.49	0.58	0.43	1.2	0.89	0.74	1.68	0.77	1.62	1.21					0.8287	0.3019	0.3876	0.3405	0.2877	0.8454	0.5158	0.2041	0.3951	0.1511	0.8393	0.8554	0.0228	0.2502	0.0961	0.4794	0.0376	0.3344	0.5106
	3589			3-aminoisobutyrate	LC/MS pos early	1566	C05145	HMDB03911	64956		7.71	0.75	0.59	0.1	0.08	0.79	3.57	0.45	0.73	0.13	0.2	1.61	1.37	0.64	0.83	1.69					0.0005	0.0014	0.476	0.3726	0.4041	0.8649	5.7302e-05	0.0001	3.8899e-05	0.0001	0.9021	0.8627	0.5858	0.6632	0.0524	0.3894	0.5871	0.7812	0.0147
	3590		Purine and Pyrimidine Metabolism	methylphosphate	LC/MS neg	37070		HMDB61711	13130		1.53	0.63	0.74	0.41	0.48	1.17	1.21	0.69	1.11	0.57	0.91	1.6	0.78	0.62	0.85	1.16					0.099	0.0658	0.4772	0.3726	0.2485	0.8454	0.0208	0.0148	0.0067	0.0067	0.6526	0.8461	0.4403	0.6493	0.4996	0.6828	0.669	0.798	0.1519
	3592		Dinucleotide	(3'-5')-adenylylcytidine	LC/MS neg	52753			10875494		0.63	0.53	1.52	0.84	2.41	2.88	2.83	0.65	1.21	0.23	0.43	1.85	0.69	3.09	0.86	0.55					0.597	0.2378	0.4941	0.3778	0.9212	0.9027	0.8759	0.2918	0.667	0.223	0.5581	0.8385	0.6579	0.6741	0.2971	0.6166	0.7139	0.8003	0.1408
	3593			(3'-5')-adenylylguanosine*	LC/MS neg	62760			444337		0.52	0.58	0.74	1.12	1.44	1.29	1.24	0.8	1.63	0.64	1.32	2.05	0.55	1.33	0.77	1.22					0.2269	0.1197	0.2525	0.2813	0.4189	0.8649	0.9475	0.3099	0.6837	0.2256	0.7325	0.851	0.9016	0.7324	0.5278	0.6828	0.2028	0.6623	0.451
	3594			(3'-5')-adenylyluridine	LC/MS neg	52740			112074		0.51	0.48	1.26	0.94	2.48	2.65	1.55	0.6	1.25	0.38	0.81	2.11	0.67	2.05	0.84	0.67					0.2767	0.1379	0.2377	0.2756	0.8485	0.8989	0.9241	0.3035	0.368	0.143	0.3203	0.7603	0.9634	0.7458	0.1431	0.5255	0.7529	0.8056	0.1556
	3595			(3'-5')-adenylyladenosine*	LC/MS neg	62396			94231		0.56	0.58	0.66	1.03	1.18	1.14	1.5	0.72	1.85	0.48	1.23	2.56	0.55	1.49	0.69	1.56					0.3662	0.167	0.2825	0.292	0.4863	0.8649	0.8616	0.2888	0.8338	0.2669	0.7011	0.8461	0.9604	0.7458	0.2317	0.5781	0.2273	0.6744	0.2133
	3599			(3'-5')-cytidylyluridine*	LC/MS neg	62399					0.13	0.09	0.69	0.71	5.23	7.31	1.21	0.64	0.86	0.53	0.71	1.34	0.44	4.02	3	0.55					0.0418	0.0329	0.0122	0.103	0.4323	0.8649	0.6042	0.2256	0.1977	0.0885	0.0743	0.7068	0.6876	0.6786	0.451	0.6723	0.7196	0.8003	0.2504
	3601			(3'-5')-guanylylcytidine	LC/MS neg	52746			107595		0.57	0.58	1.88	1.02	3.3	3.23	2.21	0.61	1.02	0.27	0.46	1.68	0.8	3.13	0.84	0.44					0.1651	0.0944	0.4674	0.3715	0.9713	0.9106	0.5003	0.1996	0.1548	0.0748	0.4459	0.7742	0.9756	0.7479	0.2806	0.6103	0.7227	0.8003	0.2674
	3602			(3'-5')-guanylyluridine	LC/MS neg	52743					0.41	0.47	2.45	1.16	5.99	5.17	2.16	0.57	1.41	0.26	0.65	2.48	0.63	3.3	0.75	0.36					0.0885	0.0613	0.3339	0.3149	0.7836	0.8883	0.4469	0.1861	0.0498	0.0302	0.2169	0.7603	0.9304	0.7402	0.2862	0.6103	0.5566	0.7773	0.3267
	3603			(3'-5')-uridylylcytidine*	LC/MS neg	62398					0.72	0.85	1.02	1.18	1.42	1.2	0.81	0.71	1.08	0.88	1.33	1.52	0.89	1.01	0.75	0.95					0.1967	0.1061	0.7012	0.4498	0.7004	0.8871	0.3598	0.1574	0.3603	0.1415	0.9991	0.8797	0.5044	0.6496	0.2273	0.5781	0.7058	0.798	0.5837
	3605			(3'-5')-uridylyluridine	LC/MS neg	52741			102258		0.63	0.55	0.97	0.87	1.54	1.77	0.86	0.6	1.03	0.7	1.2	1.73	0.72	0.99	0.79	0.77					0.49	0.2068	0.4149	0.3545	0.7194	0.8871	0.8995	0.2976	0.7394	0.2398	0.6465	0.8461	0.7244	0.6877	0.1286	0.5032	0.8153	0.8152	0.2385
	3607	Cofactors and Vitamins	Nicotinate and Nicotinamide Metabolism	quinolinate	LC/MS pos early	1899	C03722	HMDB00232	1066		1.29	0.27	0.46	0.21	0.35	1.68	0.62	0.82	0.68	1.33	1.1	0.83	1.52	0.72	4.57	2.25					0.3601	0.165	0.0047	0.0736	0.0285	0.4924	0.0003	0.0005	0.0027	0.0033	0.4743	0.795	0.1254	0.4772	0.7487	0.7358	0.3636	0.7458	0.2212
	3611			nicotinamide	LC/MS pos early	594	C00153	HMDB01406	936		5.82	0.86	0.85	0.15	0.15	0.98	1.91	1.15	0.91	0.6	0.48	0.79	1.02	0.33	1.36	1.1					1.8865e-06	9.0558e-05	0.6048	0.4168	0.4939	0.8649	3.4903e-07	1.711e-05	2.0206e-07	1.7572e-05	0.8668	0.8554	0.098	0.4653	0.638	0.7037	0.701	0.798	0.2296
	3613			nicotinamide ribonucleotide (NMN)	LC/MS pos early	22152	C00455	HMDB00229	14180		3.58	1.75	2.62	0.49	0.73	1.5	0.95	0.95	1.26	0.99	1.33	1.33	1.46	0.39	0.79	0.71					0.0041	0.006	0.202	0.2609	0.1404	0.7336	0.0876	0.05	0.1304	0.0649	0.8371	0.8554	0.5247	0.659	0.7129	0.7212	0.6673	0.798	0.7876
	3614			nicotinamide riboside	LC/MS pos early	33013	C03150	HMDB00855	439924		2.81	0.83	0.97	0.29	0.35	1.18	1.04	1.24	1.04	1.19	1	0.84	0.85	0.31	1.27	0.9					0.002	0.0035	0.6757	0.441	0.9835	0.9127	0.0006	0.0008	0.0018	0.0024	0.6909	0.8461	0.9957	0.7488	0.5346	0.6828	0.7876	0.8134	0.5381
	3615			nicotinamide adenine dinucleotide (NAD+)	LC/MS neg	5278	C00003	HMDB00902	5893		3.4	2.48	1.97	0.73	0.58	0.79	1.44	0.73	1.22	0.51	0.85	1.66	1.33	0.56	0.39	0.82					0.0175	0.0169	0.1375	0.2354	0.6971	0.8871	0.3414	0.1512	0.0434	0.0271	0.2679	0.7603	0.5484	0.6611	0.6285	0.7037	0.9625	0.8404	0.281
	3616			nicotinamide adenine dinucleotide reduced (NADH)	LC/MS neg	31475	C00004	HMDB01487	439153		3.65	3.31	1.36	0.91	0.37	0.41	1.35	0.57	0.94	0.42	0.69	1.64	1.49	0.55	0.26	1.03					0.0293	0.0249	0.1526	0.2439	0.6405	0.8871	0.4271	0.1797	0.081	0.0441	0.3293	0.7603	0.7224	0.6877	0.6464	0.7038	0.9796	0.8429	0.417
	3623			1-methylnicotinamide	LC/MS pos early	27665	C02918	HMDB00699	10129985		1.32	0.73	0.67	0.55	0.5	0.91	0.79	1.25	0.87	1.59	1.11	0.69	1.49	0.88	2.55	1.94					0.599	0.2381	0.2691	0.2903	0.1462	0.743	0.1066	0.0586	0.051	0.0307	0.7199	0.851	0.4071	0.6315	0.3695	0.659	0.7953	0.8134	0.0886
	3628			trigonelline (N'-methylnicotinate)	LC/MS pos early	32401	C01004	HMDB00875	5570		10.92	1.63	1.43	0.15	0.13	0.88	4.43	6.03	1.15	1.36	0.26	0.19	0.22	0.09	0.82	0.18					7.6624e-06	0.0001	0.0405	0.1576	0.1054	0.6884	0.0044	0.0042	0.0012	0.0018	0.6477	0.8461	0.0033	0.1215	0.0014	0.1161	0.8479	0.8189	0.7627
	3630			N1-Methyl-2-pyridone-5-carboxamide	LC/MS pos early	40469	C05842	HMDB04193	69698		2.04	0.83	1	0.41	0.49	1.21	0.82	0.52	0.78	0.63	0.95	1.5	2.54	1.02	1.58	1.97					0.0183	0.0174	0.4831	0.3738	0.9536	0.9027	0.0029	0.003	0.0211	0.0162	0.4478	0.7742	0.7596	0.6975	0.1256	0.5032	0.6663	0.798	0.2163
	3631			N1-Methyl-4-pyridone-3-carboxamide	LC/MS pos early	57584	C05843	HMDB04194	440810		3.35	0.73	0.86	0.22	0.26	1.17	0.91	0.53	0.78	0.58	0.86	1.46	2.63	0.72	1.92	2.4					0.0002	0.0009	0.2008	0.2609	0.6393	0.8871	3.6491e-06	4.6029e-05	5.0799e-05	0.0002	0.4123	0.7603	0.5657	0.6611	0.0543	0.3894	0.344	0.745	0.1683
	3632			adenosine 5'-diphosphoribose (ADP-ribose)	LC/MS neg	558	C00301	HMDB01178	192		59.56	1.72	3.21	0.03	0.05	1.86	1.58	0.05	0.12	0.03	0.08	2.52	5.6	0.15	0.16	0.22					0.0015	0.0031	0.5439	0.3931	0.1648	0.7757	0.008	0.007	0.0534	0.0317	0.4268	0.7645	0.8391	0.716	0.0245	0.2939	0.0997	0.4685	0.0391
	3635		Riboflavin Metabolism	riboflavin (Vitamin B2)	LC/MS pos early	1827	C00255	HMDB00244	493570		3.14	0.46	0.67	0.15	0.22	1.47	1.47	0.94	0.7	0.64	0.48	0.75	1.26	0.59	2.56	1.3					0.001	0.0022	0.0431	0.1585	0.2157	0.8337	1.4284e-06	3.2197e-05	2.0547e-05	9.8181e-05	0.4105	0.7603	0.1523	0.5026	0.5942	0.6982	0.7066	0.798	0.362
	3636			flavin adenine dinucleotide (FAD)	LC/MS neg	2134	C00016	HMDB01248	643975		5.06	0.92	0.87	0.18	0.17	0.94	2.17	1.04	1.13	0.48	0.52	1.09	0.96	0.41	1.09	1.26					1.4225e-05	0.0002	0.7643	0.4595	0.4649	0.8649	5.4205e-06	4.662e-05	1.33e-06	3.5255e-05	0.6652	0.8461	0.0613	0.37	0.9908	0.7897	0.6878	0.798	0.0628
	3637			flavin mononucleotide (FMN)	LC/MS neg	15797	C00061	HMDB01520	710		2.52	0.59	0.63	0.23	0.25	1.07	2.2	1.23	2	0.56	0.91	1.62	0.64	0.56	1.35	2.05					0.0121	0.0127	0.2809	0.292	0.1132	0.6884	0.0006	0.0009	0.0001	0.0003	0.6015	0.8385	0.1112	0.4657	0.6162	0.7037	0.0671	0.43	0.2678
	3638		Pantothenate and CoA Metabolism	pantothenate	LC/MS neg	1508	C00864	HMDB00210	6613		1.03	1.18	0.91	1.15	0.88	0.77	0.8	0.9	0.77	1.12	0.96	0.86	0.91	0.71	0.69	0.77					0.8044	0.2947	0.4617	0.3679	0.2694	0.8454	0.6241	0.2311	0.1785	0.0832	0.0698	0.7068	0.3793	0.6315	0.741	0.7313	0.2556	0.7007	0.5812
	3640			phosphopantetheine	LC/MS neg	15504	C01134	HMDB01416	987		17.85	1.26	0.76	0.07	0.04	0.6	6.63	1.76	1.13	0.27	0.17	0.64	1.04	0.39	1.45	1.55					0.0003	0.001	0.6228	0.4252	0.4332	0.8649	0.0013	0.0015	2.6379e-05	0.0001	0.2053	0.7603	0.0508	0.347	0.4913	0.6828	0.8376	0.8189	0.1948
	3641			3'-dephosphocoenzyme A	LC/MS neg	18289	C00882	HMDB01373	444485		49.1	1.49	0.63	0.03	0.01	0.42	12.34	1.87	2.4	0.15	0.19	1.29	0.91	0.23	1.14	3.48					3.6542e-05	0.0003	0.2405	0.2756	0.9953	0.9187	0.0013	0.0015	3.7231e-05	0.0001	0.2428	0.7603	0.0783	0.424	0.4047	0.6652	0.8576	0.8189	0.3404
	3642			3'-dephospho-acetyl-CoA	LC/MS neg	54675			193680		1.5	1.02	0.84	0.68	0.56	0.83	1.34	0.99	1.4	0.74	1.05	1.4	0.63	0.56	0.61	1.03					0.0829	0.0581	0.4206	0.3556	0.948	0.9027	0.3403	0.1512	0.0725	0.0401	0.3844	0.7603	0.4712	0.6496	0.9855	0.7897	0.7648	0.8101	0.4602
	3643			coenzyme A	LC/MS neg	46322	C00010	HMDB01423	317		25.82	1.32	0.99	0.05	0.04	0.75	5.72	2.4	3.55	0.42	0.62	1.48	0.61	0.13	1.11	2.18					5.1259e-05	0.0003	0.3998	0.3486	0.8472	0.8989	0.0007	0.0009	2.7881e-05	0.0001	0.3023	0.7603	0.0935	0.4538	0.2926	0.6103	0.4771	0.7737	0.5182
	3645			pantetheine	LC/MS neg	57555	C00831		439322		4.92	0.97	1.59	0.2	0.32	1.63	5.54	1.06	1.55	0.19	0.28	1.46	0.95	1.07	1.04	0.93					0.017	0.0169	0.6597	0.4378	0.5515	0.8871	0.0474	0.0301	0.0662	0.0377	0.8761	0.8554	0.1207	0.4772	0.9664	0.7873	0.7507	0.8056	0.1113
	3649		Ascorbate and Aldarate Metabolism	ascorbate (Vitamin C)	LC/MS pos early	32354	C00072	HMDB00044			1.3	0.71	0.82	0.55	0.63	1.15	1.78	1.49	1.32	0.84	0.74	0.88	0.9	1.24	1.89	1.45					0.3744	0.17	0.6341	0.429	0.7859	0.8883	0.1759	0.0896	0.2482	0.105	0.8377	0.8554	0.028	0.2854	0.1983	0.563	0.0847	0.4637	0.3366
	3650			dehydroascorbate	LC/MS neg	34302	C05422	HMDB01264	835		1.07	0.54	0.33	0.51	0.31	0.61	0.9	0.79	0.26	0.88	0.29	0.33	1.73	1.45	2.53	1.37					0.7087	0.27	0.0459	0.1585	0.0001	0.0301	0.0194	0.014	3.6064e-05	0.0001	0.0328	0.6757	0.4307	0.6452	0.4256	0.6652	0.0002	0.0199	0.9929
	3651			threonate	LC/MS polar	27738	C01620	HMDB00943	151152		1.45	0.64	0.99	0.44	0.68	1.54	0.42	0.67	0.32	1.61	0.76	0.47	2.13	0.62	2.23	0.69					0.2981	0.1449	0.1533	0.2439	0.8715	0.9027	0.0162	0.0121	0.2307	0.0986	0.2035	0.7603	0.0481	0.347	0.1719	0.5607	0.011	0.1799	0.5207
	3654			oxalate (ethanedioate)	LC/MS neg	20694	C00209	HMDB02329	971		0.63	0.69	1.45	1.1	2.31	2.11	0.58	0.91	0.72	1.55	1.24	0.8	1.2	1.11	1.57	0.6					0.1435	0.0846	0.2669	0.2903	0.4556	0.8649	0.716	0.2552	0.0303	0.0208	0.0675	0.7068	0.075	0.4169	0.5248	0.6828	0.4036	0.7458	0.2424
	3655			gulonate*	LC/MS polar	46957	C00257	HMDB03290	9794176		7.46	0.34	1.15	0.05	0.15	3.34	3.93	3.23	0.7	0.82	0.18	0.22	1.09	0.57	10.18	0.66					0.0063	0.0081	0.1708	0.2463	0.826	0.8989	0.0001	0.0002	0.0035	0.0041	0.2476	0.7603	0.654	0.6738	0.3744	0.6626	0.5837	0.7812	0.6575
	3657		Tocopherol Metabolism	alpha-tocopherol	LC/MS pos late	1561	C02477	HMDB01893	14985		2.64	0.67	1.08	0.26	0.41	1.6	2.1	1.31	1.07	0.63	0.51	0.82	0.9	0.71	1.75	0.89					0.0099	0.0114	0.2623	0.2903	0.9231	0.9027	0.0004	0.0006	0.0077	0.0074	0.3046	0.7603	0.0085	0.1823	0.2111	0.5696	0.3714	0.7458	0.1419
	3679			gamma-tocopherol/beta-tocopherol	LC/MS pos late	52473					1.89	0.81	0.75	0.43	0.39	0.92	1.53	1.09	0.52	0.71	0.34	0.48	3.33	2.7	4.49	2.33					0.092	0.0629	0.3526	0.3268	0.3092	0.8454	0.011	0.009	0.0088	0.0081	0.9292	0.8666	0.4831	0.6496	0.9178	0.7741	0.0873	0.4637	0.4217
	3685		Folate Metabolism	5-methyltetrahydrofolate (5MeTHF)	LC/MS neg	18330	C00440	HMDB01396	146		4	1.12	1.74	0.28	0.43	1.55	4.71	1.32	1.56	0.28	0.33	1.18	1.19	1.4	1.4	1.06					0.0022	0.0039	0.7401	0.4558	0.2702	0.8454	0.0055	0.0051	0.0376	0.0244	0.4377	0.7742	0.0019	0.0874	0.563	0.6897	0.3733	0.7458	0.0089
	3687		Tetrahydrobiopterin Metabolism	dihydrobiopterin	LC/MS pos early	35129	C00268	HMDB00038	1879		7.77	0.83	0.66	0.11	0.08	0.79	2.24	0.9	0.88	0.4	0.39	0.98	1.31	0.38	1.41	1.75					0.0003	0.001	0.4888	0.3755	0.4133	0.8649	3.099e-05	0.0001	2.0681e-05	9.8181e-05	0.8987	0.8611	0.1242	0.4772	0.981	0.7894	0.8214	0.8152	0.1187
	3690		Pterin Metabolism	pterin	LC/MS pos early	43023	C00715	HMDB00802	73000		11.77	0.81	0.82	0.07	0.07	1.01	2.06	0.93	1.01	0.45	0.49	1.08	1.04	0.18	1.19	1.28					0.0001	0.0006	0.6024	0.4161	0.7131	0.8871	2.2047e-05	9.2455e-05	3.591e-05	0.0001	0.8778	0.8554	0.4821	0.6496	0.6423	0.7037	0.9758	0.8427	0.2459
	3701		Hemoglobin and Porphyrin Metabolism	heme	LC/MS pos late	41754	C00032	HMDB03178	26945		0.58	0.78	0.81	1.34	1.38	1.03	0.2	0.78	0.46	3.86	2.28	0.59	1.39	0.48	1.38	0.79					0.7302	0.2749	0.7287	0.4541	0.9257	0.9027	0.9984	0.3203	0.6615	0.2222	0.6601	0.8461	0.0089	0.1823	0.923	0.7741	0.6188	0.7901	0.0069
	3702			bilirubin (Z,Z)	LC/MS pos late	43807	C00486	HMDB00054	5280352		0.11	0.1	0.29	0.91	2.56	2.82	0.22	0.37	0.21	1.68	0.98	0.58	0.7	1.37	2.53	0.52					0.0678	0.0487	0.0243	0.1358	0.4098	0.8649	0.646	0.2363	0.3025	0.1236	0.1396	0.7378	0.3992	0.6315	0.8817	0.7665	0.4017	0.7458	0.4864
	3705			biliverdin	LC/MS neg	2137	C00500	HMDB01008	5353439		0.19	0.13	0.32	0.7	1.66	2.39	0.13	0.45	0.12	3.53	0.94	0.27	1.52	0.99	5.05	0.56					0.0945	0.0639	0.0162	0.1168	0.2464	0.8454	0.4296	0.1797	0.5948	0.2067	0.1897	0.7603	0.0021	0.0907	0.0221	0.2939	0.0011	0.0453	0.3733
	3714		Thiamine Metabolism	thiamin (Vitamin B1)	LC/MS pos early	5341	C00378	HMDB00235	1130		8.45	0.74	0.91	0.09	0.11	1.23	3.95	1.69	1.68	0.43	0.43	1	0.76	0.35	1.72	1.4					2.421e-05	0.0003	0.8139	0.47	0.9224	0.9027	1.141e-05	7.9131e-05	1.7748e-05	9.7114e-05	0.8902	0.858	0.0104	0.1823	0.1906	0.5607	0.3826	0.7458	0.1817
	3715			thiamin monophosphate	LC/MS pos early	15798	C01081	HMDB02666	3382778		6.14	0.85	0.86	0.14	0.14	1.02	2.72	1.23	1.56	0.45	0.57	1.26	0.9	0.4	1.3	1.62					7.2072e-06	0.0001	0.9415	0.5145	0.9434	0.9027	5.6879e-06	4.662e-05	5.7323e-06	7.4798e-05	0.9981	0.8797	0.0095	0.1823	0.5	0.6828	0.2448	0.6992	0.0474
	3716			thiamin diphosphate	LC/MS neg	35670	C00068	HMDB01372	1132		5.71	0.77	0.88	0.14	0.15	1.14	1.53	1	0.99	0.65	0.65	1	1.08	0.29	1.4	1.23					9.5447e-05	0.0005	0.7982	0.4645	0.5326	0.8784	4.2863e-05	0.0001	1.3225e-05	8.9735e-05	0.7118	0.85	0.2475	0.5474	0.7743	0.744	0.7716	0.8129	0.3815
	3722		Vitamin A Metabolism	retinol (Vitamin A)	LC/MS pos late	1806	C00473	HMDB00305	445354		36.1	0.67	0.61	0.02	0.02	0.91	13.84	1.27	0.91	0.09	0.07	0.72	0.83	0.32	1.55	1.22					0.0002	0.0007	0.6154	0.4231	0.4998	0.8655	3.4158e-05	0.0001	1.9675e-05	9.8181e-05	0.8622	0.8554	0.176	0.5138	0.5615	0.6897	0.882	0.8189	0.433
	3738		Vitamin B6 Metabolism	pyridoxamine	LC/MS pos early	2150	C00534	HMDB01431	1052		2.89	0.77	1.42	0.27	0.49	1.84	2.63	0.85	1.26	0.33	0.48	1.47	0.85	0.78	0.95	0.76					0.0057	0.0076	0.9097	0.5036	0.5098	0.8687	0.0042	0.004	0.0297	0.0205	0.4404	0.7742	0.1133	0.4657	0.7415	0.7313	0.6761	0.798	0.0581
	3739			pyridoxamine phosphate	LC/MS pos early	3138	C00647	HMDB01555	1053		12.59	1.02	0.77	0.08	0.06	0.75	4.11	1.28	1.23	0.31	0.3	0.95	1.03	0.34	1.29	1.64					7.617e-05	0.0004	0.7704	0.4595	0.482	0.8649	0.0002	0.0003	8.1106e-06	8.9735e-05	0.3216	0.7603	0.0668	0.3866	0.935	0.7764	0.8018	0.8149	0.079
	3741			pyridoxal	LC/MS pos early	1651	C00250	HMDB01545	1050		2.4	1.03	1.79	0.43	0.75	1.74	1.33	0.91	1.12	0.68	0.84	1.24	0.95	0.53	0.84	0.59					0.0033	0.0051	0.2414	0.2756	0.0506	0.5877	0.0603	0.0365	0.275	0.1138	0.4133	0.7603	0.6201	0.6716	0.7884	0.7467	0.767	0.8101	0.446
	3742			pyridoxate	LC/MS neg	31555	C00847	HMDB00017	6723		5.61	1.66	1.32	0.3	0.23	0.79	1.77	0.92	0.52	0.52	0.29	0.56	0.81	0.26	0.45	0.32					0.0002	0.0007	0.1554	0.2439	0.4217	0.8649	0.0093	0.0079	0.0017	0.0023	0.5283	0.8193	0.8623	0.7201	0.5048	0.6828	0.0998	0.4685	0.4017
	3744	Xenobiotics	Benzoate Metabolism	hippurate	LC/MS neg	15753	C01586	HMDB00714	464		1.34	3.05	2.9	2.28	2.17	0.95	1.88	2.73	0.9	1.45	0.48	0.33	0.52	0.73	0.46	0.16					0.2419	0.1259	0.0023	0.0621	0.0036	0.2321	0.0452	0.0289	0.0637	0.0364	0.8736	0.8554	0.1519	0.5026	0.0878	0.459	0.5231	0.7737	0.774
	3758			benzoate	LC/MS neg	15778	C00180	HMDB01870	243		0.88	0.87	0.95	0.99	1.08	1.1	0.95	0.72	1.78	0.76	1.86	2.45	0.76	0.82	0.63	1.42					0.2407	0.1256	0.7915	0.463	0.8522	0.9006	0.3606	0.1574	0.1757	0.0822	0.6526	0.8461	0.905	0.7338	0.3191	0.6293	0.1848	0.6487	0.3795
	3776			catechol sulfate	LC/MS neg	35320		HMDB59724	3083879		0.46	1.98	1.42	4.3	3.08	0.71	2.34	2.62	1.39	1.12	0.59	0.53	0.26	1.32	0.34	0.25					0.2918	0.1426	0.0381	0.1548	0.3316	0.8454	0.0026	0.0027	0.0469	0.0287	0.252	0.7603	0.1436	0.4971	0.1885	0.5607	0.5983	0.783	0.8783
	3795			4-vinylphenol sulfate	LC/MS neg	36098	C05627	HMDB62775	6426766		1.5	0.97	0.79	0.65	0.53	0.82	0.97	0.55	1.6	0.57	1.66	2.9	0.81	0.52	0.46	1.64					0.1437	0.0846	0.8219	0.4709	0.9105	0.9027	0.0936	0.0521	0.1758	0.0822	0.7358	0.851	0.8096	0.7084	0.1068	0.4943	0.381	0.7458	0.1671
	3816			p-cresol sulfate	LC/MS neg	36103		HMDB11635	4615423		0.4	0.33	0.47	0.83	1.17	1.41	0.34	0.34	0.5	1.01	1.49	1.48	1.05	0.88	1.07	1.12					0.0887	0.0613	0.0079	0.0903	0.0914	0.6574	0.3	0.1373	0.988	0.2993	0.2932	0.7603	0.0074	0.1823	0.0162	0.2763	0.1483	0.5937	0.7564
	3827			3-(3-hydroxyphenyl)propionate sulfate	LC/MS neg	45415			187488		2.05	4.97	4.8	2.42	2.34	0.97	6	1.61	2.63	0.27	0.44	1.63	0.61	1.78	0.2	0.33					0.3159	0.1505	0.0048	0.0736	0.0015	0.2089	0.0561	0.0344	0.0209	0.0162	0.6648	0.8461	0.0486	0.347	0.4294	0.6652	0.1452	0.5934	0.2236
	3832			3-phenylpropionate (hydrocinnamate)	LC/MS neg	15749	C05629	HMDB00764	107		0.83	4	1.58	4.83	1.9	0.39	1.03	1.07	1	1.03	0.97	0.94	0.65	0.81	0.17	0.41					0.4479	0.192	9.5654e-08	2.8279e-05	0.1061	0.6884	8.1612e-09	1.0318e-06	0.0202	0.0158	1.9652e-05	0.0097	0.8913	0.7311	0.7947	0.7479	1	0.8436	0.9016
	3962		Food Component/Plant	2-oxindole-3-acetate	LC/MS neg	40479		HMDB35514	3080590		3.43	3.36	1.66	0.98	0.48	0.49	1.24	1.25	1	1.01	0.81	0.8	0.71	0.26	0.26	0.43					0.0007	0.0017	0.0064	0.0796	0.2093	0.8337	0.4263	0.1797	0.0209	0.0162	0.1172	0.7378	0.6413	0.6738	0.6092	0.7037	1	0.8436	0.9638
	3974			3-hydroxyindolin-2-one	LC/MS pos early	42561	C11130		6097		0.62	0.35	0.33	0.57	0.54	0.94	0.78	0.4	0.46	0.52	0.6	1.15	0.57	0.72	0.64	0.79					0.2623	0.1344	0.0231	0.1342	0.027	0.4924	0.2278	0.1104	0.2536	0.1065	0.9474	0.8683	0.5099	0.6502	0.1188	0.5032	0.1198	0.5213	0.3584
	3987			gluconate	LC/MS polar	587	C00257	HMDB00625	10690		1.88	0.27	0.87	0.14	0.46	3.21	1.02	0.48	0.97	0.47	0.95	2.02	0.73	0.39	1.29	0.81					0.0987	0.0658	0.059	0.1714	0.7663	0.8871	0.0008	0.001	0.0535	0.0317	0.108	0.7342	0.7501	0.6963	0.0726	0.4299	0.9272	0.8267	0.1356
	4053			galacturonate 1-phosphate	LC/MS neg	38588	C04037		440203		0.54	0.62	0.57	1.14	1.05	0.92	1.01	2.47	1.5	2.44	1.48	0.61	0.86	1.59	3.41	2.25					0.0703	0.0501	0.2683	0.2903	0.2112	0.8337	0.4653	0.1911	0.5589	0.1967	0.8831	0.8554	0.743	0.6959	0.0647	0.4097	0.1739	0.6415	0.1245
	4065			ergothioneine	LC/MS pos early	37459	C05570	HMDB03045	3032311		3.45	1.1	0.8	0.32	0.23	0.73	1.24	1.38	0.78	1.11	0.63	0.57	1.05	0.38	1.32	1.03					0.0005	0.0015	0.1602	0.2439	0.4199	0.8649	0.0249	0.0173	0.0053	0.0057	0.5415	0.8315	0.7713	0.6975	0.7531	0.7358	0.9524	0.8362	0.9809
	4067			erythritol	LC/MS polar	20699	C00503	HMDB02994	222285		2.59	0.39	0.82	0.15	0.32	2.13	1.84	0.77	0.38	0.42	0.2	0.49	1.03	0.73	2.05	0.47					0.0216	0.0199	0.0604	0.1714	0.5295	0.8784	9.9182e-05	0.0002	0.0043	0.0048	0.2016	0.7603	0.0909	0.449	0.508	0.6828	0.0339	0.3279	0.0211
	4072			ferulic acid 4-sulfate	LC/MS neg	47114		HMDB29200	6305574		4.53	1.98	0.98	0.44	0.22	0.5	1.81	1.95	1	1.08	0.55	0.51	0.45	0.18	0.44	0.45					0.0003	0.001	0.1034	0.2077	0.7394	0.8871	0.0265	0.0184	0.0001	0.0003	0.0522	0.7068	0.3062	0.5934	0.3104	0.6268	1	0.8436	0.9928
	4094			homostachydrine*	LC/MS pos early	33009	C08283	HMDB33433	441447		22.2	2.69	3.18	0.12	0.14	1.18	2.44	2.49	1.18	1.02	0.48	0.47	0.81	0.09	0.75	0.3					5.3653e-07	3.434e-05	0.0553	0.1685	0.0154	0.4855	0.0003	0.0004	0.0014	0.002	0.5811	0.8385	0.0586	0.3693	0.0346	0.3493	0.659	0.798	0.8111
	4130			N-glycolylneuraminate	LC/MS pos early	37123	C03410	HMDB00833	123802		1.31	0.41	0.48	0.32	0.36	1.15	0.84	0.41	0.46	0.49	0.55	1.13	1.32	0.85	1.31	1.29					0.1964	0.1061	0.0254	0.1379	0.0465	0.5877	0.0008	0.001	0.0017	0.0023	0.7906	0.8554	0.5457	0.6611	0.0242	0.2939	0.0601	0.419	0.0907
	4207			stachydrine	LC/MS pos early	34384	C10172	HMDB04827	115244		11.34	2.2	1.43	0.19	0.13	0.65	5.14	3.11	1.07	0.6	0.21	0.34	0.55	0.25	0.77	0.41					1.8046e-07	1.7325e-05	0.0133	0.1058	0.2009	0.8337	0.0006	0.0009	1.1954e-05	8.9735e-05	0.204	0.7603	0.0002	0.0292	0.0035	0.1713	0.9112	0.8244	0.3353
	4215			tartarate	LC/MS neg	15336	C00898	HMDB00956	444305		0.52	0.12	1.01	0.22	1.94	8.69	1.68	0.26	0.52	0.15	0.31	2.02	0.98	3.17	2.16	0.5					0.1455	0.0852	0.0002	0.0111	0.8334	0.8989	0.0115	0.0092	0.0976	0.0519	9.2402e-05	0.0228	0.4885	0.6496	0.0092	0.2548	0.3865	0.7458	0.0014
	4232			methyl glucopyranoside (alpha + beta)	LC/MS neg	46144					1.91	0.27	0.3	0.14	0.16	1.12	1.35	0.76	0.58	0.56	0.43	0.77	0.68	0.48	1.93	1.32					0.0543	0.0403	0.0475	0.1605	0.0699	0.6351	0.0002	0.0004	0.0004	0.0009	0.8567	0.8554	0.6477	0.6738	0.6766	0.7055	0.3478	0.745	0.3838
	4260			pyrraline	LC/MS neg	48428		HMDB33143	122228		7.35	4.19	2.02	0.57	0.27	0.48	2.14	4.93	0.94	2.31	0.44	0.19	0.41	0.12	0.48	0.19					0.0002	0.0007	0.002	0.0581	0.1051	0.6884	0.3975	0.1707	0.0162	0.0135	0.1057	0.7342	0.231	0.5472	0.0174	0.2763	0.9129	0.8244	0.2134
	4267			N-acetylpyrraline	LC/MS neg	48438					4.42	3.92	2.4	0.89	0.54	0.61	1.21	2.62	1	2.17	0.83	0.38	0.36	0.1	0.24	0.15					0.0013	0.0029	0.0035	0.0734	0.0789	0.6384	0.7293	0.2579	0.1076	0.0553	0.202	0.7603	0.7912	0.7066	0.4375	0.6652	1	0.8436	0.6075
	4349		Bacterial/Fungal	tartronate (hydroxymalonate)	LC/MS neg	20693	C02287	HMDB35227	45		0.56	0.54	0.35	0.96	0.62	0.64	0.55	0.77	0.31	1.4	0.56	0.4	1.55	1.5	2.18	1.36					0.1433	0.0846	0.0643	0.1714	0.0027	0.2321	0.6843	0.2467	0.0967	0.0516	0.204	0.7603	0.0394	0.3265	0.4929	0.6828	0.0029	0.0777	0.1583
	4740		Drug - Topical Agents	salicylate	LC/MS polar	1515	C00805	HMDB01895	338		0.86	0.64	0.95	0.74	1.1	1.48	1.22	2.2	1	1.8	0.82	0.45	0.38	0.54	1.3	0.4					0.4435	0.1909	0.8957	0.5015	0.4954	0.8649	0.5245	0.2061	0.932	0.2882	0.5812	0.8385	0.6819	0.6746	0.1751	0.5607	0.919	0.8252	0.339
	4767		Drug - Other	S-carboxymethyl-L-cysteine	LC/MS pos early	47897	C03727	HMDB29415	1080		0.74	0.64	0.74	0.87	1	1.16	2.68	1.5	0.59	0.56	0.22	0.39	0.68	2.46	1.6	0.54					0.301	0.1459	0.2951	0.2968	0.3928	0.8649	0.9898	0.3193	0.8549	0.2711	0.8449	0.8554	0.1631	0.5138	0.4171	0.6652	0.3358	0.745	0.5511
	4816		Chemical	sulfate*	LC/MS neg	46960	C00059	HMDB01448	1118		0.78	0.58	0.9	0.73	1.15	1.56	0.74	0.73	0.88	0.99	1.19	1.21	1.04	0.98	1.32	1.02					0.7289	0.2749	0.0328	0.1516	0.9446	0.9027	0.0699	0.0416	0.7816	0.2521	0.0384	0.7068	0.2043	0.5427	0.1869	0.5607	0.6129	0.7892	0.9585
	4819			O-sulfo-L-tyrosine	LC/MS neg	45413			514186		1.05	0.47	0.85	0.45	0.81	1.82	0.9	0.62	0.55	0.69	0.61	0.89	1.37	1.17	1.8	0.88					0.6476	0.2518	0.0183	0.1175	0.4139	0.8649	0.0057	0.0052	0.2058	0.0911	0.1099	0.7342	0.9192	0.7395	0.3042	0.6221	0.2305	0.6752	0.2598
	4837			2-aminophenol sulfate	LC/MS neg	43266		HMDB61116	181670		0.33	2.29	1.76	6.87	5.3	0.77	2.84	3.51	0.81	1.24	0.28	0.23	0.26	2.23	0.4	0.12					0.2863	0.1413	0.0183	0.1175	0.0927	0.6574	0.001	0.0013	0.0078	0.0074	0.4646	0.784	0.2366	0.5472	0.2254	0.5781	0.7672	0.8101	0.9763
	4927			trizma acetate	LC/MS pos early	20710	C07182		6503		0.4	0.47	0.48	1.2	1.22	1.02	0.43	2.02	0.64	4.73	1.5	0.32	1.44	1.55	6.15	1.91					0.0345	0.0286	0.2778	0.2915	0.2576	0.8454	0.283	0.1312	0.3046	0.1239	0.9618	0.8741	0.1118	0.4657	0.913	0.7741	0.2609	0.7007	0.0903
	4941			3-hydroxypyridine sulfate	LC/MS neg	48448					20.06	1.17	0.5	0.06	0.03	0.43	3.02	1.57	1.1	0.52	0.36	0.7	0.41	0.06	0.54	0.89					1.409e-05	0.0002	0.732	0.4546	0.3251	0.8454	4.1888e-05	0.0001	5.7092e-07	1.9369e-05	0.1874	0.7603	0.2291	0.5472	0.6185	0.7037	0.8763	0.8189	0.476
	4955			thioproline	LC/MS pos early	53231			93176		0.74	0.72	1.33	0.97	1.8	1.86	1.87	4.55	1.36	2.43	0.73	0.3	0.78	1.96	4.94	0.8					0.7684	0.2867	0.4316	0.3605	0.7438	0.8871	0.6212	0.2305	0.5352	0.1907	0.2679	0.7603	0.4124	0.6315	0.0602	0.3962	0.5185	0.7737	0.2755
[truncated: 41 more columns]

## Sheet: AminoAcids heatmap expanded
	University of North Carolina at Chapel Hill UNCH-01-18MDCLP HD4 diet and mouse endometrial tumors
	Heat map of statistically significant biochemicals profiled in this study.										Fold of Change																				Statistical Values
											Two-Way ANOVA - Contrasts																Two-Way ANOVA - Main Effects				Two-Way ANOVA - Contrasts
												LFD						HFD					HFD LFD				Diet Effect	Treatment Effect	Diet: Treatment Interaction Effect		LFD												HFD
		Super Pathway	Sub Pathway	Biochemical Name							PD1 Control	LFD + ONC201 LFD + veh	SPR589 Control	ONC201 PD1	SPR589 PD1	SPR589 ONC201	PD1 Control	HFD + ONC201 HFD + veh	SPR589 Control	ONC201 PD1	SPR589 PD1	SPR589 ONC201	Control	PD1	ONC201	SPR589					PD1 Control		ONC201 Control		SPR589 Control		ONC201 PD1		SPR589 PD1		SPR589 ONC201		PD1 Control		ONC201 Control		SPR589 Control		ONC201 PD1
	Pathway Sort Order				Platform	Comp ID	KEGG	HMDB	PUBCHEM	X																				X	p-value	q-value	p-value	q-value	p-value	q-value	p-value	q-value	p-value	q-value	p-value	q-value	p-value	q-value	p-value	q-value	p-value	q-value	p-value
	1	Amino Acid	Glycine, Serine and Threonine Metabolism	glycine	LC/MS pos early	58	C00037	HMDB00123	750		1.12	0.73	0.85	0.65	0.76	1.17	1.66	2.04	1.37	1.23	0.83	0.67	0.86	1.27	2.41	1.39					0.3446	0.1598	0.3849	0.3397	0.9319	0.9027	0.074	0.0433	0.3035	0.1238	0.4327	0.7724	0.1752	0.5138	0.0993	0.4845	0.4577	0.7737	0.7601
	2			N-acetylglycine	LC/MS neg	27710		HMDB00532	10972		0.87	0.49	0.45	0.56	0.52	0.92	0.8	0.8	0.54	1	0.67	0.67	1.32	1.21	2.16	1.59					0.9088	0.3208	0.0195	0.1226	0.0106	0.4233	0.0147	0.0112	0.0079	0.0075	0.8065	0.8554	0.4566	0.6496	0.3908	0.6652	0.0238	0.2698	0.9083
	4			sarcosine	LC/MS pos early	1516	C00213	HMDB00271	1088		35.49	0.97	0.55	0.03	0.02	0.56	0.51	0.23	0.16	0.44	0.31	0.7	3.99	0.06	0.93	1.16					3.2162e-05	0.0003	0.8911	0.5008	0.3867	0.8649	4.955e-05	0.0001	1.9628e-06	3.6995e-05	0.3172	0.7603	0.4116	0.6315	0.1878	0.5607	0.0975	0.4685	0.6126
	5			dimethylglycine	LC/MS pos early	5086	C01026	HMDB00092	673		4.35	0.52	0.83	0.12	0.19	1.61	0.57	0.37	0.26	0.66	0.45	0.69	3.01	0.39	2.17	0.93					0.0014	0.0029	0.1596	0.2439	0.7988	0.8927	1.7649e-05	8.7362e-05	0.0007	0.0011	0.2463	0.7603	0.1089	0.4657	0.0559	0.3894	0.005	0.1037	0.7438
	6			betaine	LC/MS pos early	3141	C00719	HMDB00043	247		6.24	1.12	1.23	0.18	0.2	1.1	1.88	0.99	1.29	0.52	0.68	1.3	1.16	0.35	1.03	1.22					5.9707e-06	0.0001	0.4776	0.3726	0.4746	0.8649	5.7854e-05	0.0001	5.8738e-05	0.0002	0.9961	0.8797	0.0914	0.449	0.8273	0.7593	0.4847	0.7737	0.0583
	7			betaine aldehyde	LC/MS pos early	15499	C00576	HMDB01252	249		2.22	1.4	1.12	0.63	0.5	0.8	3.53	1.32	3.35	0.37	0.95	2.54	0.74	1.18	0.7	2.24					0.047	0.0354	0.2371	0.2756	0.677	0.8871	0.4009	0.1713	0.111	0.0567	0.4395	0.7742	0.0534	0.347	0.4381	0.6652	0.061	0.4194	0.0084
	9			serine	LC/MS pos early	1648	C00065	HMDB00187	5951		1.02	0.6	0.74	0.59	0.72	1.23	1.25	1.2	0.97	0.96	0.77	0.81	1.03	1.26	2.05	1.35					0.6745	0.2616	0.0898	0.1938	0.3259	0.8454	0.0367	0.0243	0.164	0.0784	0.4612	0.7809	0.4018	0.6315	0.5571	0.6897	0.7906	0.8134	0.7999
	10			N-acetylserine	LC/MS pos early	37076		HMDB02931	65249		0.85	0.59	0.75	0.69	0.88	1.27	0.89	1.14	0.79	1.29	0.89	0.69	1.23	1.27	2.36	1.29					0.6156	0.2427	0.0504	0.1605	0.2627	0.8454	0.1386	0.0731	0.5323	0.1901	0.3834	0.7603	0.4907	0.6496	0.6404	0.7037	0.3604	0.7458	0.2504
	16			threonine	LC/MS pos early	1284	C00188	HMDB00167	6288		1.01	0.67	0.69	0.66	0.68	1.03	1.44	1.36	1.12	0.94	0.78	0.83	0.89	1.27	1.81	1.45					0.5819	0.2333	0.2087	0.2671	0.3044	0.8454	0.0743	0.0433	0.1185	0.06	0.8136	0.8554	0.2461	0.5472	0.3832	0.6652	0.9083	0.8244	0.7692
	17			N-acetylthreonine	LC/MS neg	33939		HMDB62557	152204		1.17	0.64	0.75	0.55	0.64	1.17	1.47	0.84	0.75	0.57	0.51	0.9	1.32	1.65	1.72	1.32					0.2971	0.1448	0.1689	0.246	0.378	0.8649	0.0184	0.0135	0.0585	0.0341	0.6132	0.8445	0.4855	0.6496	0.5424	0.6843	0.2739	0.7019	0.1948
	28		Alanine and Aspartate Metabolism	alanine	LC/MS pos early	1126	C00041	HMDB00161	5950		1.71	0.77	0.83	0.45	0.49	1.08	1.32	1.12	0.88	0.85	0.67	0.78	1.11	0.86	1.62	1.18					0.0119	0.0125	0.275	0.2907	0.3496	0.8459	0.0006	0.0008	0.0009	0.0014	0.8733	0.8554	0.2424	0.5472	0.684	0.7066	0.4316	0.7551	0.442
	30			N-acetylalanine	LC/MS neg	1585	C02847	HMDB00766	88064		0.79	0.29	0.36	0.37	0.45	1.23	0.67	0.49	0.54	0.72	0.8	1.11	1.41	1.2	2.36	2.12					0.9021	0.319	0.0105	0.0984	0.0494	0.5877	0.0076	0.0068	0.0376	0.0244	0.5137	0.8193	0.6697	0.6741	0.2878	0.6103	0.335	0.745	0.521
	34			aspartate	LC/MS pos early	443	C00049	HMDB00191	5960		0.89	0.74	1.03	0.83	1.16	1.4	1.29	1.43	1.18	1.1	0.91	0.83	1.02	1.49	1.99	1.18					0.9704	0.3339	0.4728	0.3726	0.9469	0.9027	0.4504	0.1867	0.9174	0.2861	0.5144	0.8193	0.308	0.5941	0.1955	0.563	0.5001	0.7737	0.778
	35			N-acetylaspartate (NAA)	LC/MS neg	22185	C01042	HMDB00812	65065		0.49	0.71	3.24	1.45	6.63	4.57	0.2	0.24	0.17	1.22	0.87	0.71	5.17	2.08	1.75	0.27					0.0174	0.0169	0.4454	0.362	0.8687	0.9027	0.0948	0.0526	0.0258	0.0187	0.549	0.8345	0.6477	0.6738	0.8373	0.7598	0.5325	0.7749	0.8009
	38			asparagine	LC/MS pos early	512	C00152	HMDB00168	6267		0.77	0.56	0.74	0.73	0.96	1.32	1.31	1.39	0.98	1.06	0.75	0.7	1.06	1.81	2.65	1.41					0.4065	0.1794	0.0821	0.1895	0.3569	0.8497	0.3504	0.1545	0.9263	0.2878	0.3995	0.7603	0.3635	0.6315	0.3381	0.645	0.9123	0.8244	0.9601
	39			N-acetylasparagine	LC/MS pos early	33942		HMDB06028	99715		4.74	0.44	1.69	0.09	0.36	3.82	3.46	0.55	0.66	0.16	0.19	1.2	1.43	1.05	1.76	0.55					0.0175	0.0169	0.115	0.2165	0.7287	0.8871	0.0002	0.0003	0.0394	0.0252	0.0569	0.7068	0.8872	0.7291	0.3097	0.6268	0.4636	0.7737	0.3809
	41		Glutamate Metabolism	glutamate	LC/MS pos early	57	C00025	HMDB00148	611		1.1	0.84	0.86	0.77	0.78	1.02	1.53	1.48	1.36	0.97	0.89	0.92	0.93	1.29	1.63	1.47					0.3886	0.1751	0.7172	0.4529	0.7202	0.8871	0.2235	0.1089	0.225	0.0971	0.9967	0.8797	0.1039	0.4657	0.1282	0.5032	0.2846	0.7184	0.9125
	42			glutamine	LC/MS pos early	53	C00064	HMDB00641	5961		1.4	0.57	0.95	0.41	0.68	1.65	0.94	0.75	0.88	0.79	0.93	1.18	1.07	0.72	1.39	0.99					0.1075	0.0689	0.0116	0.103	0.9478	0.9027	0.0001	0.0002	0.0946	0.0508	0.0137	0.527	0.6047	0.6636	0.1149	0.5032	0.6495	0.798	0.2823
	43			alpha-ketoglutaramate*	LC/MS polar	62101					1.33	0.56	2.57	0.42	1.94	4.62	0.85	0.4	0.99	0.47	1.16	2.47	1.88	1.2	1.34	0.72					0.4179	0.1832	0.0794	0.1879	0.0726	0.6351	0.0124	0.0096	0.3114	0.1261	0.0008	0.126	0.7975	0.7084	0.0368	0.3636	0.8533	0.8189	0.0645
	44			N-acetylglutamate	LC/MS pos early	15720	C00624	HMDB01138	70914		6.82	0.93	0.93	0.14	0.14	1	1.67	0.52	0.43	0.31	0.25	0.82	1.27	0.31	0.7	0.58					0.0003	0.001	0.8164	0.4705	0.7874	0.8883	0.0002	0.0003	0.0001	0.0003	0.9701	0.8768	0.4883	0.6496	0.3129	0.628	0.1416	0.5888	0.0929
	45			N-acetylglutamine	LC/MS polar	33943	C02716	HMDB06029	182230		16.05	0.58	1.67	0.04	0.1	2.87	6.16	0.27	0.47	0.04	0.08	1.73	2.89	1.11	1.35	0.81					0.0004	0.0013	0.4431	0.3619	0.7849	0.8883	4.0584e-05	0.0001	0.001	0.0015	0.3003	0.7603	0.3448	0.6297	0.0496	0.3894	0.3161	0.7346	0.0049
	47			4-hydroxyglutamate	LC/MS pos early	40499	C03079	HMDB01344	439902		2	0.5	0.65	0.25	0.32	1.29	2.23	0.73	0.38	0.33	0.17	0.52	1.28	1.43	1.86	0.75					0.1707	0.0958	0.287	0.2926	0.3636	0.8519	0.0177	0.0132	0.0259	0.0187	0.8737	0.8554	0.7077	0.6877	0.3883	0.6652	0.0642	0.4283	0.2186
	49			gamma-carboxyglutamate	LC/MS pos early	38754		HMDB41900	40772		1.11	0.46	0.43	0.41	0.39	0.95	1.07	1.14	1.08	1.06	1.01	0.95	0.76	0.74	1.91	1.91					0.2895	0.1421	0.0678	0.1742	0.1169	0.6884	0.0053	0.0049	0.0107	0.0097	0.7849	0.8554	0.8685	0.7231	0.7137	0.7212	0.857	0.8189	0.5949
	50			glutamate, gamma-methyl ester	LC/MS pos early	33487		HMDB61715	68662		1.67	0.81	0.84	0.48	0.5	1.04	1.72	1.33	1.16	0.77	0.68	0.88	1.03	1.06	1.69	1.43					0.0398	0.0316	0.6267	0.4269	0.4637	0.8649	0.0125	0.0096	0.0066	0.0067	0.8042	0.8554	0.1064	0.4657	0.4269	0.6652	0.7932	0.8134	0.4009
	51			pyroglutamine*	LC/MS pos early	46225			134508		6.12	0.75	1.28	0.12	0.21	1.71	4.53	1.52	0.73	0.34	0.16	0.48	0.57	0.42	1.15	0.33					0.0042	0.006	0.5394	0.391	0.4823	0.8649	0.0007	0.001	0.0252	0.0184	0.1917	0.7603	0.0718	0.4046	0.6439	0.7037	0.5686	0.7773	0.1742
	52			N-acetyl-aspartyl-glutamate (NAAG)	LC/MS pos early	35665	C12270	HMDB01067	5255		0.09	0.71	0.28	8.03	3.22	0.4	0.08	0.1	0.06	1.18	0.77	0.65	1.62	1.55	0.23	0.37					0.0059	0.0078	0.1313	0.2293	0.1255	0.6884	0.1796	0.0912	0.1872	0.0856	0.9809	0.8797	0.0145	0.2294	0.0726	0.4299	0.0173	0.2223	0.481
	53			beta-citrylglutamate	LC/MS neg	54923	C20775		72715786		0.22	0.25	0.4	1.18	1.87	1.58	1.13	1.29	0.68	1.14	0.6	0.53	0.55	2.89	2.79	0.93					0.0026	0.0044	0.1469	0.2419	0.3231	0.8454	0.0912	0.0512	0.0329	0.0221	0.6346	0.8461	0.71	0.6877	0.7188	0.7212	0.673	0.798	0.4654
	59			S-1-pyrroline-5-carboxylate	LC/MS pos early	42370	C04322	HMDB01301	1196		2.59	0.76	0.65	0.3	0.25	0.86	1.7	0.39	0.91	0.23	0.53	2.32	1.17	0.77	0.6	1.63					0.0115	0.0124	0.4579	0.3676	0.3226	0.8454	0.0015	0.0017	0.0007	0.0012	0.8023	0.8554	0.2542	0.5534	0.0468	0.3894	0.9049	0.8244	0.0026
	65		Histidine Metabolism	histidine	LC/MS neg	59	C00135	HMDB00177	6274		1.86	0.68	0.82	0.36	0.44	1.22	1.43	1.11	1.05	0.77	0.74	0.95	0.99	0.76	1.62	1.27					0.0072	0.009	0.1319	0.2293	0.4757	0.8649	8.5335e-05	0.0002	0.001	0.0015	0.4181	0.7603	0.2008	0.5369	0.8591	0.7598	0.9776	0.8427	0.2686
	66			1-methylhistidine	LC/MS pos early	30460	C01152	HMDB00001	92105		0.56	0.56	0.74	1.01	1.33	1.31	1.58	1.66	1.6	1.05	1.01	0.96	1.13	3.23	3.35	2.45					0.5726	0.2305	0.3344	0.3149	0.7592	0.8871	0.6853	0.2467	0.7959	0.2562	0.5076	0.8178	0.6632	0.6741	0.1767	0.5607	0.3191	0.738	0.3546
	67			3-methylhistidine	LC/MS neg	15677	C01152	HMDB00479	64969		0.27	0.43	0.63	1.61	2.35	1.46	1.7	0.91	1.34	0.54	0.79	1.47	0.75	4.81	1.6	1.61					0.0307	0.0257	0.273	0.2903	0.7979	0.8927	0.2656	0.125	0.0543	0.032	0.3984	0.7603	0.6444	0.6738	0.9841	0.7897	0.6951	0.798	0.6302
	68			N-acetylhistidine	LC/MS pos early	33946	C02997	HMDB32055	75619		16.34	0.37	1.09	0.02	0.07	2.95	3.93	0.29	0.36	0.07	0.09	1.27	2.4	0.58	1.86	0.8					0.0006	0.0015	0.1229	0.2227	0.9189	0.9027	4.3237e-06	4.6029e-05	0.0008	0.0013	0.1011	0.7342	0.4784	0.6496	0.1091	0.4997	0.1753	0.6415	0.0236
	69			N-acetyl-3-methylhistidine*	LC/MS pos early	43256			193270		5.91	0.22	1.56	0.04	0.26	6.96	10.91	0.38	0.76	0.04	0.07	1.99	1.25	2.31	2.13	0.61					0.0294	0.0249	0.0656	0.1717	0.5676	0.8871	0.0002	0.0003	0.1003	0.0527	0.0179	0.5933	0.2896	0.5771	0.1448	0.5271	0.6794	0.798	0.0143
	70			N-acetyl-1-methylhistidine*	LC/MS pos early	43255			193270		3.42	0.28	1.06	0.08	0.31	3.83	4	0.73	0.63	0.18	0.16	0.87	1.84	2.15	4.83	1.1					0.0092	0.0108	0.0847	0.1925	0.425	0.8649	5.6252e-05	0.0001	0.0605	0.0347	0.0139	0.527	0.5768	0.6632	0.3562	0.6539	0.3276	0.745	0.1425
	72			trans-urocanate	LC/MS pos early	607	C00785	HMDB00301	736715		0.68	0.52	0.88	0.77	1.29	1.68	1.8	1.28	1.67	0.71	0.93	1.3	0.51	1.35	1.25	0.97					0.0456	0.0345	0.934	0.5133	0.6961	0.8871	0.0546	0.0337	0.0184	0.0149	0.6362	0.8461	0.8979	0.7311	0.95	0.7841	0.5469	0.7773	0.9477
	73			cis-urocanate	LC/MS neg	40410		HMDB34174	1549103		0.66	0.56	0.5	0.85	0.77	0.9	1.63	1.03	1.35	0.63	0.83	1.31	0.61	1.52	1.13	1.65					0.0079	0.0096	0.321	0.3133	0.054	0.5877	0.0807	0.0465	0.4215	0.1582	0.333	0.7603	0.4936	0.6496	0.9752	0.7876	0.5718	0.7773	0.4744
	74			imidazole propionate	LC/MS pos early	40730		HMDB02271	70630		7.72	0.75	1.39	0.1	0.18	1.84	2.29	1.74	1.7	0.76	0.74	0.97	1.26	0.37	2.93	1.55					0.0028	0.0046	0.1685	0.246	0.7235	0.8871	4.4441e-05	0.0001	0.0074	0.0072	0.0863	0.7205	0.2735	0.572	0.5932	0.6982	0.4255	0.7522	0.5708
	75			formiminoglutamate	LC/MS pos early	43493	C00439	HMDB00854	439233		0.57	0.06	0.08	0.11	0.14	1.26	0.3	0.07	0.03	0.24	0.11	0.47	2.06	1.08	2.33	0.86					0.6282	0.2462	2.5823e-05	0.0038	0.0001	0.0301	0.0001	0.0002	0.0005	0.0009	0.649	0.8461	0.1171	0.4757	0.0004	0.0987	4.4335e-06	0.0011	0.0317
	76			imidazole lactate	LC/MS pos early	15716	C05568	HMDB02320	440129		3.38	0.53	0.74	0.16	0.22	1.41	1.53	1.51	0.38	0.99	0.25	0.25	1.79	0.81	5.15	0.92					0.0148	0.0151	0.3253	0.3133	0.6511	0.8871	0.001	0.0013	0.0046	0.0049	0.592	0.8385	0.7676	0.6975	0.9314	0.7757	0.07	0.4418	0.834
	77			carnosine	LC/MS neg	1768	C00386	HMDB00033	439224		0.29	0.75	0.51	2.64	1.8	0.68	0.15	0.18	0.18	1.24	1.27	1.02	1.29	0.66	0.31	0.46					0.1135	0.0717	0.5562	0.3982	0.77	0.8871	0.3117	0.1416	0.1931	0.0876	0.7664	0.8554	0.1232	0.4772	0.2411	0.5853	0.3079	0.7314	0.7025
	80			anserine	LC/MS pos early	15747	C01262	HMDB00194	112072		0.09	1.36	0.57	14.58	6.07	0.42	0.05	0.04	0.02	0.87	0.51	0.58	2.84	1.39	0.08	0.12					0.1045	0.0678	0.2021	0.2609	0.674	0.8871	0.7175	0.2552	0.2231	0.0965	0.3878	0.7603	0.0864	0.4413	0.0804	0.4403	0.015	0.2222	0.9712
	81			histamine	LC/MS pos early	1574	C00388	HMDB00870	774		0.29	0.88	0.61	3.09	2.13	0.69	1.49	1.16	0.48	0.78	0.33	0.42	0.56	2.94	0.74	0.45					0.0056	0.0075	0.954	0.5184	0.2967	0.8454	0.0065	0.0059	0.0687	0.0387	0.3237	0.7603	0.3845	0.6315	0.8804	0.7665	0.3812	0.7458	0.3088
	82			1-methylhistamine	LC/MS pos early	43831	C05127	HMDB00898	3614		0.46	0.74	0.48	1.61	1.03	0.64	1.17	0.77	0.76	0.66	0.65	0.99	0.95	2.41	0.99	1.52					0.0029	0.0046	0.5819	0.4077	0.153	0.7532	0.0124	0.0096	0.0937	0.0505	0.3727	0.7603	0.8203	0.7093	0.4934	0.6828	0.5611	0.7773	0.6461
	83			1-methyl-4-imidazoleacetate	LC/MS pos early	32350	C05828	HMDB02820	75810		3.2	0.44	0.79	0.14	0.25	1.82	1.81	0.34	0.45	0.19	0.25	1.32	1.18	0.67	0.92	0.67					0.0043	0.006	0.0335	0.1516	0.6208	0.8871	5.6502e-06	4.662e-05	0.0011	0.0015	0.0963	0.7325	0.2882	0.5771	0.0071	0.2138	0.087	0.4637	0.0003
	84			1-ribosyl-imidazoleacetate*	LC/MS pos early	61868	C05131	HMDB02331	5117448		2.79	0.44	0.57	0.16	0.21	1.32	1.1	0.48	0.32	0.44	0.29	0.67	0.94	0.37	1.03	0.52					0.0025	0.0043	0.3252	0.3133	0.7132	0.8871	0.0001	0.0003	0.0009	0.0014	0.5349	0.8238	0.5955	0.6636	0.0607	0.3962	0.0048	0.1037	0.1706
	85			4-imidazoleacetate	LC/MS pos early	32349	C02835	HMDB02024	96215		0.44	0.48	0.56	1.1	1.28	1.16	1.48	0.94	0.82	0.63	0.56	0.88	0.28	0.95	0.55	0.41					0.0424	0.0331	0.037	0.1548	0.0916	0.6574	0.9515	0.3099	0.7145	0.2331	0.6698	0.8461	0.2703	0.5703	0.6368	0.7037	0.3078	0.7314	0.1189
	92		Lysine Metabolism	lysine	LC/MS pos early	1301	C00047	HMDB00182	5962		1.72	0.54	0.84	0.32	0.49	1.55	0.99	0.81	0.65	0.81	0.66	0.81	1.23	0.71	1.82	0.95					0.0174	0.0169	0.0172	0.1173	0.5928	0.8871	1.318e-05	7.9218e-05	0.0044	0.0048	0.0586	0.7068	0.996	0.7488	0.3826	0.6652	0.0959	0.4685	0.3853
	93			N2-acetyllysine	LC/MS polar	36751	C12989	HMDB00446	92907		1.42	1	1	0.7	0.7	1	3.22	1	1	0.31	0.31	1	1	2.26	1	1					0.2729	0.1365	1	0.526	1	0.9214	0.2729	0.1278	0.2729	0.1132	1	0.8797	0.0164	0.2378	1	0.7904	1	0.8436	0.0164
	94			N6-acetyllysine	LC/MS neg	36752	C02727	HMDB00206	92832		2.17	0.51	0.6	0.24	0.28	1.18	1.2	0.76	0.57	0.63	0.47	0.75	1.26	0.7	1.88	1.19					0.0061	0.008	0.0761	0.183	0.2026	0.8337	2.9311e-05	0.0001	0.0001	0.0004	0.6023	0.8385	0.5775	0.6632	0.2291	0.5781	0.0601	0.419	0.0822
	101			N6,N6,N6-trimethyllysine	LC/MS pos early	1498	C03793	HMDB01325	440120		1.89	0.53	0.69	0.28	0.37	1.32	1.02	0.88	0.54	0.86	0.53	0.61	1.34	0.72	2.24	1.04					0.0358	0.0294	0.0584	0.1714	0.3927	0.8649	0.0002	0.0003	0.0042	0.0047	0.2846	0.7603	0.8864	0.7291	0.5713	0.6915	0.0708	0.4418	0.6717
	102			5-hydroxylysine	LC/MS pos early	15685	C16741	HMDB00450	1029		0.44	0.35	0.82	0.8	1.87	2.34	0.75	1.25	1.04	1.68	1.4	0.83	0.61	1.05	2.2	0.78					0.0045	0.0062	0.2184	0.2679	0.8179	0.8989	0.0857	0.0491	0.0082	0.0077	0.3144	0.7603	0.6702	0.6741	0.6257	0.7037	0.832	0.8184	0.3628
	103			5-(galactosylhydroxy)-L-lysine	LC/MS pos early	43582					0.56	0.64	0.72	1.15	1.29	1.12	0.91	1.72	1.13	1.9	1.25	0.66	0.73	1.19	1.96	1.15					0.1039	0.0677	0.4355	0.3619	0.7578	0.8871	0.3862	0.1662	0.1835	0.0845	0.6358	0.8461	0.7237	0.6877	0.278	0.6103	0.7561	0.8056	0.1532
	104			saccharopine	LC/MS pos early	1495	C00449	HMDB00279	160556		13.06	0.39	0.39	0.03	0.03	1	6.65	0.53	0.53	0.08	0.08	1	0.74	0.37	1	1					0.0009	0.0021	0.5228	0.3864	0.5228	0.8733	0.0001	0.0003	0.0001	0.0003	1	0.8797	0.1768	0.5138	0.6142	0.7037	0.6142	0.7892	0.067
	105			2-aminoadipate	LC/MS pos early	6146	C00956	HMDB00510	469		1.83	0.11	0.19	0.06	0.11	1.82	1.02	0.31	0.29	0.3	0.28	0.93	0.76	0.43	2.2	1.12					0.1055	0.0682	0.0816	0.1895	0.1683	0.7852	0.0014	0.0016	0.0039	0.0045	0.7034	0.8461	0.7221	0.6877	0.3958	0.6652	0.2053	0.6623	0.2309
	109			glutarylcarnitine (C5-DC)	LC/MS pos early	44664		HMDB13130	71464488		42.6	0.15	0.29	0	0.01	1.87	28.26	0.42	0.41	0.01	0.01	0.96	0.8	0.53	2.2	1.13					7.2314e-06	0.0001	0.0523	0.1628	0.3353	0.8454	1.1444e-08	1.0318e-06	3.1077e-07	1.7572e-05	0.3116	0.7603	0.1328	0.4877	0.2658	0.5994	0.2307	0.6752	0.0111
	113			pipecolate	LC/MS pos early	1444	C00408	HMDB00070	849		1.32	1.7	0.96	1.29	0.73	0.57	2.04	2.23	1.22	1.09	0.6	0.54	1.2	1.85	1.58	1.51					0.2018	0.1081	0.3979	0.3481	0.9533	0.9027	0.6599	0.2404	0.1825	0.0845	0.3665	0.7603	0.214	0.5472	0.0445	0.3894	0.6579	0.798	0.4215
	117			5-aminovalerate	LC/MS pos early	18319	C00431	HMDB03355	138		1.76	1.2	0.78	0.68	0.45	0.65	2.29	0.47	0.83	0.2	0.36	1.77	1.02	1.33	0.4	1.08					0.0542	0.0403	0.7561	0.458	0.443	0.8649	0.1025	0.0565	0.0087	0.0081	0.2833	0.7603	0.0152	0.2294	0.0531	0.3894	0.5626	0.7773	5.2348e-05
	119			N,N,N-trimethyl-5-aminovalerate	LC/MS pos early	57687					0.94	0.92	0.98	0.98	1.03	1.06	1.41	1.38	0.98	0.98	0.7	0.71	0.54	0.8	0.8	0.54					0.7966	0.2925	0.9722	0.5216	0.8416	0.8989	0.8236	0.282	0.9538	0.2925	0.8689	0.8554	0.3011	0.5874	0.4163	0.6652	0.9409	0.8336	0.8221
	120		Phenylalanine Metabolism	phenylalanine	LC/MS pos early	64	C00079	HMDB00159	6140		1.3	0.65	0.68	0.5	0.52	1.04	1.09	1.01	0.83	0.93	0.76	0.82	1.12	0.94	1.75	1.37					0.1035	0.0676	0.1204	0.2212	0.2142	0.8337	0.0023	0.0024	0.0056	0.0059	0.7471	0.8554	0.757	0.6975	0.973	0.7873	0.3441	0.745	0.7314
	121			N-acetylphenylalanine	LC/MS neg	33950	C03519	HMDB00512	74839		1.88	0.54	1.45	0.29	0.77	2.68	1.78	0.26	0.51	0.15	0.29	1.94	2.34	2.22	1.14	0.82					0.1705	0.0958	0.1977	0.2609	0.5934	0.8871	0.01	0.0083	0.3963	0.1511	0.072	0.7068	0.5351	0.659	0.0215	0.2939	0.2498	0.7007	0.0848
	122			1-carboxyethylphenylalanine	LC/MS neg	62566					1.9	0.5	0.32	0.26	0.17	0.64	1.51	1.15	0.79	0.77	0.52	0.68	1.09	0.86	2.49	2.67					0.0293	0.0249	0.1473	0.2419	0.0219	0.4915	0.0006	0.0008	3.6355e-05	0.0001	0.3694	0.7603	0.2596	0.5615	0.6626	0.7054	0.352	0.745	0.4854
	125			phenylpyruvate	LC/MS polar	566	C00166	HMDB00205	997		2.26	0.58	0.63	0.26	0.28	1.09	1.25	0.7	0.68	0.56	0.54	0.97	1.07	0.59	1.3	1.16					0.0079	0.0096	0.2136	0.2673	0.0736	0.6351	0.0002	0.0004	3.781e-05	0.0001	0.5695	0.8385	0.6691	0.6741	0.2632	0.5994	0.2664	0.7007	0.1254
	126			phenyllactate (PLA)	LC/MS neg	22130	C05607	HMDB00779	3848		1.46	0.47	0.75	0.32	0.51	1.61	0.43	0.62	0.32	1.45	0.75	0.52	2.11	0.62	2.82	0.91					0.2022	0.1081	0.0078	0.0903	0.3005	0.8454	0.0002	0.0003	0.024	0.0178	0.0874	0.7205	0.0072	0.1823	0.0341	0.3493	7.7697e-05	0.0123	0.5261
	137		Tyrosine Metabolism	tyrosine	LC/MS pos early	1299	C00082	HMDB00158	6057		1.78	0.89	0.98	0.5	0.55	1.09	1.01	0.79	0.64	0.79	0.63	0.8	1.94	1.09	1.72	1.26					0.0086	0.0103	0.968	0.5203	0.7058	0.8871	0.0095	0.008	0.022	0.0167	0.7357	0.851	0.9813	0.7488	0.4247	0.6652	0.0886	0.4637	0.4383
	138			N-acetyltyrosine	LC/MS neg	32390		HMDB00866	68310		1.06	0.7	1.46	0.66	1.37	2.08	2.26	0.17	0.24	0.08	0.11	1.39	4.84	10.3	1.19	0.79					0.9448	0.3281	0.4174	0.3546	0.9952	0.9187	0.3793	0.1644	0.9401	0.2894	0.4208	0.7603	0.2402	0.5472	0.0131	0.2763	0.0263	0.2771	0.1678
	139			1-carboxyethyltyrosine	LC/MS neg	62564					1.69	0.54	0.31	0.32	0.18	0.58	1.05	0.75	0.45	0.71	0.43	0.6	1.79	1.12	2.52	2.59					0.097	0.0649	0.1651	0.244	0.0138	0.4758	0.0034	0.0033	0.0001	0.0003	0.252	0.7603	0.7323	0.6905	0.6643	0.7054	0.0393	0.3391	0.439
	147			4-hydroxyphenylpyruvate	LC/MS neg	1669	C01179	HMDB00707	979		2.62	0.66	0.73	0.25	0.28	1.11	0.55	0.41	0.37	0.75	0.67	0.89	1.5	0.32	0.94	0.75					0.0036	0.0054	0.1252	0.2243	0.0563	0.5877	3.4832e-05	0.0001	9.8065e-06	8.9735e-05	0.6914	0.8461	0.0551	0.353	0.0066	0.2138	0.0013	0.0463	0.3772
	150			3-(4-hydroxyphenyl)lactate	LC/MS neg	32197	C03672	HMDB00755	9378		3.48	0.53	0.51	0.15	0.15	0.97	0.34	0.29	0.17	0.86	0.51	0.6	3.65	0.36	2.02	1.25					0.0098	0.0113	0.0973	0.2011	0.1218	0.6884	7.5641e-05	0.0002	0.0001	0.0003	0.9072	0.8643	0.0195	0.2502	0.0099	0.2586	0.0003	0.0203	0.7843
	154			phenol sulfate	LC/MS neg	32553	C02180	HMDB60015	74426		0.87	1.32	1.11	1.51	1.28	0.85	1.93	1.72	1.33	0.89	0.69	0.77	0.58	1.28	0.76	0.69					0.5554	0.225	0.4367	0.3619	0.9746	0.9106	0.1751	0.0895	0.5768	0.2013	0.4183	0.7603	0.0236	0.2502	0.1016	0.4851	0.2476	0.7007	0.5021
	155			phenol glucuronide	LC/MS neg	52747		HMDB60014	87235		1.12	3.48	0.95	3.1	0.85	0.27	7.46	3.15	1.4	0.42	0.19	0.44	0.35	2.35	0.32	0.52					0.9654	0.3332	0.0838	0.1921	0.9112	0.9027	0.0914	0.0512	0.8768	0.2765	0.0667	0.7068	0.015	0.2294	0.1842	0.5607	0.6846	0.798	0.2412
	168			3-methoxytyrosine	LC/MS pos early	12017		HMDB01434	1670		0.83	1.48	1.4	1.79	1.68	0.94	1.43	0.99	1.24	0.69	0.86	1.24	1.79	3.09	1.2	1.58					0.8458	0.3053	0.3133	0.3106	0.4542	0.8649	0.2307	0.1109	0.3471	0.1369	0.792	0.8554	0.3831	0.6315	0.6037	0.7037	0.5967	0.783	0.7217
	189			p-cresol glucuronide*	LC/MS neg	48841		HMDB11686	154035		0.59	0.43	0.43	0.73	0.73	1	0.65	0.58	0.36	0.89	0.55	0.62	1.05	1.17	1.41	0.88					0.1758	0.0984	0.06	0.1714	0.0877	0.6574	0.5802	0.2193	0.7119	0.2331	0.8536	0.8554	0.0431	0.3362	0.1785	0.5607	0.0335	0.3279	0.4756
	191			N-formylphenylalanine	LC/MS neg	48433			759256		0.57	0.3	0.5	0.53	0.89	1.66	0.52	0.62	0.35	1.19	0.66	0.55	1.78	1.65	3.66	1.22					0.1222	0.0747	0.0103	0.0984	0.0592	0.5895	0.2719	0.1277	0.7184	0.2339	0.4572	0.7775	0.1809	0.5138	0.3659	0.659	0.043	0.3578	0.6571
	210		Tryptophan Metabolism	tryptophan	LC/MS pos early	54	C00078	HMDB00929	6305		1.16	0.72	0.78	0.62	0.68	1.08	1.36	1.14	0.95	0.84	0.7	0.83	1	1.18	1.58	1.22					0.3435	0.1597	0.1038	0.2077	0.272	0.8454	0.0123	0.0096	0.0447	0.0276	0.5849	0.8385	0.2111	0.5472	0.5999	0.7031	0.674	0.798	0.4623
	211			N-acetyltryptophan	LC/MS neg	33959	C03137	HMDB13713	700653		0.46	0.78	1.29	1.68	2.79	1.66	2.2	0.63	0.83	0.29	0.38	1.33	0.98	4.67	0.79	0.63					0.1796	0.1	0.4991	0.3802	0.9922	0.9187	0.4982	0.1996	0.1827	0.0845	0.5053	0.8178	0.8277	0.7106	0.2171	0.5696	0.5853	0.7812	0.3069
	217			C-glycosyltryptophan	LC/MS pos early	48782			10981970		0.68	0.57	0.72	0.84	1.05	1.26	1.06	1.34	1.49	1.26	1.4	1.11	0.97	1.51	2.27	2.01					0.1152	0.0721	0.2411	0.2756	0.6355	0.8871	0.6765	0.2445	0.2641	0.1101	0.4804	0.8018	0.9611	0.7458	0.5291	0.6828	0.3028	0.7314	0.4979
	221			kynurenine	LC/MS pos early	15140	C00328	HMDB00684	161166		1.38	0.15	0.15	0.11	0.11	1.05	0.93	0.41	0.42	0.44	0.45	1.03	0.48	0.32	1.34	1.3					0.0735	0.0523	0.0033	0.0734	0.0026	0.2321	1.3112e-05	7.9218e-05	1.0179e-05	8.9735e-05	0.9371	0.8683	0.7877	0.705	0.0935	0.4774	0.0737	0.4482	0.1557
	223			N-acetylkynurenine (2)	LC/MS pos early	48757					0.26	0.21	0.95	0.8	3.67	4.56	1.99	0.15	0.45	0.07	0.22	3.05	0.8	6.16	0.56	0.38					0.1578	0.0913	0.1096	0.2131	0.8425	0.8989	0.8447	0.2858	0.2224	0.0965	0.1586	0.7603	0.4018	0.6315	0.016	0.2763	0.2788	0.7108	0.1032
	225			kynurenate	LC/MS neg	1417	C01717	HMDB00715	3845		2.36	0.51	1.1	0.22	0.47	2.15	0.5	0.21	0.33	0.41	0.67	1.62	2.55	0.54	1.02	0.77					0.067	0.0484	0.1236	0.2227	0.9522	0.9027	0.0013	0.0015	0.0591	0.0342	0.1382	0.7378	0.54	0.6611	0.018	0.2763	0.2158	0.6643	0.0717
	234			serotonin	LC/MS pos early	2342	C00780	HMDB00259	5202		0.97	0.96	1.02	0.99	1.05	1.06	0.65	1.07	0.6	1.65	0.92	0.56	1	0.68	1.12	0.59					0.3254	0.1532	0.5694	0.4018	0.5145	0.8711	0.6753	0.2445	0.1061	0.0549	0.2254	0.7603	0.8538	0.7184	0.489	0.6828	0.7405	0.805	0.3821
	237			5-hydroxyindoleacetate	LC/MS pos early	437	C05635	HMDB00763	1826		0.48	0.97	0.73	2	1.51	0.76	0.7	0.85	0.78	1.21	1.11	0.92	0.88	1.28	0.77	0.94					0.0423	0.0331	0.9592	0.5186	0.1914	0.8271	0.0473	0.0301	0.4463	0.1646	0.2088	0.7603	0.7666	0.6975	0.5669	0.6897	0.732	0.8006	0.3861
	241			indolelactate	LC/MS pos early	18349	C02043	HMDB00671	92904		0.77	0.48	0.84	0.63	1.09	1.74	0.45	0.66	0.78	1.46	1.72	1.17	1.32	0.78	1.81	1.22					0.4857	0.2054	0.0324	0.1516	0.739	0.8871	0.1381	0.073	0.7146	0.2331	0.0672	0.7068	0.0067	0.1823	0.1314	0.5032	0.3207	0.7381	0.1934
	242			indoleacetate	LC/MS neg	27513	C00954	HMDB00197	802		1.26	1.03	0.89	0.82	0.7	0.86	1.13	0.81	0.68	0.72	0.6	0.84	0.75	0.67	0.59	0.57					0.1229	0.0747	0.9468	0.5164	0.9374	0.9027	0.1082	0.0591	0.1058	0.0549	0.9906	0.8797	0.9816	0.7488	0.4282	0.6652	0.1786	0.6415	0.4416
	244			indolepropionate	LC/MS neg	32405		HMDB02302	3744		0.98	1.53	1.17	1.56	1.19	0.76	0.88	1.08	0.37	1.23	0.42	0.34	0.38	0.34	0.27	0.12					0.4086	0.1799	0.0649	0.1714	0.1542	0.7532	0.2942	0.1352	0.5405	0.1922	0.6583	0.8461	0.897	0.7311	0.8963	0.774	0.1437	0.5925	0.7951
	251			indoleacetylglycine	LC/MS neg	54730			446640		4.09	1.78	2.39	0.43	0.59	1.35	0.8	0.44	0.23	0.55	0.29	0.53	2.55	0.5	0.63	0.25					0.0069	0.0087	0.4862	0.3753	0.2048	0.8337	0.038	0.025	0.1267	0.0634	0.5611	0.8385	0.7229	0.6877	0.292	0.6103	0.0626	0.424	0.4814
	254			3-indoxyl sulfate	LC/MS neg	27672		HMDB00682	10258		0.59	0.89	0.84	1.5	1.42	0.94	0.73	0.8	0.73	1.1	0.99	0.9	0.86	1.06	0.77	0.74					0.107	0.0689	0.9519	0.5182	0.7468	0.8871	0.1202	0.0643	0.1931	0.0876	0.7928	0.8554	0.3944	0.6315	0.6255	0.7037	0.5095	0.7737	0.7141
	261		Leucine, Isoleucine and Valine Metabolism	leucine	LC/MS pos early	60	C00123	HMDB00687	6106		1.73	0.62	0.72	0.36	0.42	1.17	1.19	1.06	0.83	0.89	0.7	0.79	1.12	0.77	1.92	1.3					0.0105	0.0118	0.1118	0.2146	0.3426	0.8454	0.0001	0.0002	0.0008	0.0012	0.5094	0.8178	0.4968	0.6496	0.8578	0.7598	0.4048	0.7458	0.616
	262			N-acetylleucine	LC/MS neg	1587	C02710	HMDB11756	70912		5.18	0.58	1.33	0.11	0.26	2.3	1.55	0.25	0.49	0.16	0.32	1.98	2.25	0.67	0.97	0.84					0.0019	0.0035	0.2396	0.2756	0.6403	0.8871	5.276e-05	0.0001	0.0067	0.0067	0.1038	0.7342	0.894	0.7311	0.0193	0.2763	0.2641	0.7007	0.0139
	263			1-carboxyethylleucine	LC/MS neg	62559					2.78	0.49	0.32	0.17	0.11	0.65	1.73	1.29	0.82	0.74	0.48	0.64	1.05	0.65	2.79	2.75					0.0048	0.0065	0.2365	0.2756	0.0476	0.5877	0.0001	0.0003	1.0619e-05	8.9735e-05	0.4047	0.7603	0.1793	0.5138	0.5573	0.6897	0.4686	0.7737	0.4428
	265			4-methyl-2-oxopentanoate	LC/MS neg	22116	C00233	HMDB00695	70		0.85	0.97	1.52	1.14	1.79	1.57	0.84	0.74	0.75	0.89	0.89	1	0.83	0.82	0.64	0.41					0.1683	0.0953	0.9405	0.5145	0.6516	0.8871	0.1917	0.0955	0.0705	0.0394	0.599	0.8385	0.397	0.6315	0.5233	0.6828	0.6321	0.797	0.833
	272			isovalerylglycine	LC/MS neg	35107		HMDB00678	546304		9.19	0.56	1.61	0.06	0.18	2.86	0.07	0.02	0.03	0.33	0.42	1.25	25.58	0.2	1.09	0.48					0.018	0.0172	0.5269	0.3875	0.4835	0.8649	0.0035	0.0034	0.0859	0.0466	0.186	0.7603	0.1216	0.4772	0.0225	0.2939	0.0371	0.3344	0.4332
	273			isovalerylcarnitine (C5)	LC/MS pos early	34407		HMDB00688	6426851		1.81	1.11	0.96	0.61	0.53	0.87	1.57	0.78	1.11	0.49	0.71	1.43	1.31	1.14	0.91	1.52					0.0933	0.0633	0.5851	0.4077	0.8786	0.9027	0.2494	0.119	0.1254	0.0633	0.6937	0.8461	0.6717	0.6741	0.5874	0.6959	0.7461	0.8056	0.3359
	280			beta-hydroxyisovalerate	LC/MS polar	12129		HMDB00754	69362		0.88	0.59	0.68	0.67	0.78	1.16	0.98	0.98	0.74	1	0.76	0.75	0.97	1.09	1.62	1.05					0.8344	0.3028	0.0781	0.1862	0.2452	0.8454	0.118	0.0633	0.3384	0.1343	0.533	0.8235	0.8135	0.7084	0.9369	0.7765	0.4647	0.7737	0.8754
	296			isoleucine	LC/MS pos early	1125	C00407	HMDB00172	6306		1.78	0.59	0.72	0.33	0.4	1.22	1.09	0.94	0.84	0.87	0.77	0.89	1.19	0.73	1.91	1.4					0.0114	0.0124	0.0708	0.1785	0.3729	0.8621	5.5799e-05	0.0001	0.001	0.0015	0.3452	0.7603	0.7488	0.6963	0.8258	0.7593	0.4384	0.7558	0.5895
	298			N-acetylisoleucine	LC/MS neg	33967		HMDB61684	2802421		5.33	0.48	0.92	0.09	0.17	1.93	1.18	0.48	0.6	0.41	0.51	1.25	1.72	0.38	1.73	1.12					0.0003	0.0011	0.051	0.1605	0.5566	0.8871	6.0828e-07	1.8281e-05	5.6743e-05	0.0002	0.1637	0.7603	0.9963	0.7488	0.0855	0.4524	0.2256	0.6744	0.0864
	299			1-carboxyethylisoleucine	LC/MS neg	62558					2.85	0.43	0.25	0.15	0.09	0.59	1.64	1.2	0.9	0.73	0.55	0.76	0.97	0.56	2.72	3.49					0.0036	0.0054	0.1812	0.2515	0.0261	0.4924	6.6546e-05	0.0002	3.2696e-06	4.6218e-05	0.3482	0.7603	0.2812	0.5738	0.6829	0.7066	0.5765	0.7781	0.4999
	300			3-methyl-2-oxovalerate	LC/MS neg	15676	C00671	HMDB03736	47		0.87	0.89	1.48	1.03	1.71	1.66	0.87	0.72	0.8	0.82	0.92	1.11	0.97	0.97	0.78	0.52					0.3132	0.15	0.7971	0.4645	0.5072	0.8687	0.4502	0.1867	0.0987	0.0522	0.359	0.7603	0.6703	0.6741	0.4345	0.6652	0.7009	0.798	0.7203
	301			alpha-hydroxyisovalerate	LC/MS neg	33937		HMDB00407	99823		0.45	0.26	0.53	0.57	1.19	2.08	0.25	0.25	0.18	1	0.72	0.73	2.51	1.42	2.47	0.86					0.3069	0.1481	0.0175	0.1173	0.3478	0.8455	0.1563	0.081	0.9328	0.2882	0.134	0.7378	0.0018	0.0874	0.0015	0.1161	0.0002	0.0199	0.9576
	303			2-methylbutyrylcarnitine (C5)	LC/MS pos early	45095		HMDB00378	6426901		2.07	0.82	0.97	0.4	0.47	1.17	1.34	0.41	0.96	0.31	0.71	2.33	1.83	1.19	0.91	1.81					0.0229	0.0207	0.7613	0.4595	0.9733	0.9106	0.0109	0.009	0.0248	0.0182	0.736	0.851	0.6501	0.6738	0.0284	0.3082	0.9723	0.8427	0.0094
	306			tiglylcarnitine (C5:1-DC)	LC/MS pos early	35428		HMDB02366	22833596		1.24	0.81	0.73	0.65	0.59	0.9	0.77	0.54	0.54	0.7	0.71	1.01	1.53	0.95	1.01	1.14					0.2682	0.1352	0.4702	0.3726	0.2697	0.8454	0.0714	0.0421	0.0306	0.0208	0.6984	0.8461	0.815	0.7084	0.1896	0.5607	0.1998	0.6623	0.2783
	309			3-hydroxy-2-ethylpropionate	LC/MS neg	32397		HMDB00396	188979		0.58	0.37	0.68	0.64	1.16	1.81	0.41	0.34	0.49	0.84	1.21	1.43	2.16	1.52	1.99	1.58					0.3463	0.1602	0.0629	0.1714	0.5462	0.8867	0.3427	0.1514	0.7324	0.238	0.1995	0.7603	0.0112	0.1893	0.0032	0.1713	0.0273	0.2816	0.6318
	311			ethylmalonate	LC/MS polar	15765		HMDB00622	11756		2.82	0.86	0.94	0.3	0.33	1.1	1.68	0.83	0.95	0.5	0.57	1.14	1.23	0.73	1.2	1.25					0.0003	0.0011	0.7378	0.4558	0.8075	0.8942	0.0001	0.0002	0.0002	0.0004	0.9274	0.8666	0.228	0.5472	0.5099	0.6828	0.897	0.8237	0.0661
	312			methylsuccinate	LC/MS polar	15745		HMDB01844	10349		3.95	0.65	1.12	0.16	0.28	1.74	2.49	0.58	0.76	0.23	0.31	1.31	1.14	0.72	1.03	0.77					0.0046	0.0063	0.6535	0.4371	0.6204	0.8871	0.0013	0.0015	0.0165	0.0137	0.347	0.7603	0.1745	0.5138	0.1381	0.5112	0.2696	0.7007	0.0061
	318			valine	LC/MS pos early	1649	C00183	HMDB00883	6287		1.82	0.5	0.66	0.28	0.36	1.31	1.18	0.98	0.85	0.83	0.72	0.87	1.08	0.7	2.11	1.39					0.0095	0.011	0.0397	0.1566	0.2964	0.8454	1.8951e-05	8.7593e-05	0.0005	0.0009	0.292	0.7603	0.5671	0.6611	0.8618	0.7598	0.4382	0.7558	0.4562
	319			N-acetylvaline	LC/MS neg	1591		HMDB11757	66789		1.81	0.64	0.84	0.35	0.46	1.32	1.18	0.93	0.87	0.79	0.74	0.94	1.26	0.82	1.84	1.31					0.0019	0.0035	0.1142	0.2165	0.6135	0.8871	1.443e-05	8.1314e-05	0.0004	0.0009	0.2755	0.7603	0.5016	0.6496	0.4001	0.6652	0.3686	0.7458	0.1342
	321			1-carboxyethylvaline	LC/MS neg	62562					2.15	0.44	0.26	0.2	0.12	0.59	1.55	1.17	0.87	0.76	0.56	0.74	0.93	0.67	2.5	3.18					0.0136	0.014	0.1318	0.2293	0.021	0.4915	0.0002	0.0003	1.247e-05	8.9735e-05	0.3922	0.7603	0.2991	0.5874	0.7011	0.719	0.4662	0.7737	0.5096
	323			3-methyl-2-oxobutyrate	LC/MS polar	44526	C00141	HMDB00019	49		0.74	0.72	1.55	0.97	2.1	2.16	0.76	0.38	0.43	0.5	0.57	1.13	0.93	0.96	0.5	0.26					0.177	0.0988	0.4296	0.3605	0.4732	0.8649	0.5677	0.217	0.0422	0.0265	0.1359	0.7378	0.6004	0.6636	0.0692	0.427	0.0928	0.4637	0.1881
	324			2-hydroxy-3-methylvalerate	LC/MS neg	36746		HMDB00317	164623		1.33	0.49	0.54	0.37	0.41	1.11	0.28	0.25	0.25	0.91	0.92	1.02	2.06	0.43	1.05	0.96					0.8686	0.3094	0.0753	0.1825	0.214	0.8337	0.0532	0.0331	0.1608	0.077	0.5763	0.8385	0.0035	0.1215	0.0016	0.1161	0.0016	0.0515	0.7775
	326			isobutyrylcarnitine (C4)	LC/MS pos early	33441		HMDB00736	168379		0.92	0.85	1.08	0.93	1.17	1.26	1.28	0.44	1.11	0.34	0.87	2.53	1.47	2.04	0.76	1.52					0.5304	0.2183	0.7478	0.4568	0.9183	0.9027	0.7588	0.2662	0.466	0.1715	0.6717	0.8461	0.9842	0.7488	0.0282	0.3082	0.8923	0.8231	0.0295
	328			3-hydroxyisobutyrate	LC/MS polar	1549	C06001	HMDB00336	87		0.95	0.64	0.81	0.67	0.86	1.27	1.11	0.48	0.76	0.43	0.69	1.59	1.56	1.83	1.17	1.47					0.9948	0.3399	0.0906	0.194	0.5189	0.8729	0.0918	0.0512	0.5231	0.1878	0.2851	0.7603	0.8073	0.7084	0.0242	0.2939	0.387	0.7458	0.0423
	332		Methionine, Cysteine, SAM and Taurine Metabolism	methionine	LC/MS pos early	1302	C00073	HMDB00696	6137		1.48	1.02	0.91	0.69	0.62	0.89	1.29	1.26	0.93	0.98	0.72	0.74	1.36	1.19	1.68	1.39					0.0432	0.0332	0.7243	0.4541	0.9795	0.9106	0.0909	0.0512	0.0408	0.0258	0.7052	0.8462	0.3459	0.6297	0.5082	0.6828	0.5644	0.7773	0.7761
	333			N-acetylmethionine	LC/MS neg	1589	C02712	HMDB11745	448580		1.08	0.48	0.47	0.45	0.44	0.98	1.4	1.08	0.86	0.77	0.61	0.8	1.07	1.4	2.39	1.94					0.5052	0.211	0.0461	0.1585	0.0547	0.5877	0.0094	0.0079	0.0114	0.0101	0.9374	0.8683	0.2843	0.5746	0.8675	0.7618	0.5226	0.7737	0.3645
	334			N-formylmethionine	LC/MS neg	2829	C03145	HMDB01015	439750		1.11	0.77	0.87	0.7	0.79	1.13	0.97	1.17	0.88	1.2	0.9	0.75	1.31	1.15	1.98	1.32					0.4376	0.1899	0.2706	0.2903	0.6328	0.8871	0.0645	0.0388	0.213	0.0938	0.5286	0.8193	0.8245	0.7093	0.7612	0.7367	0.5355	0.7749	0.5996
	336			methionine sulfone	LC/MS pos early	44878			69961		1.53	0.68	0.6	0.44	0.39	0.88	1.48	1	1.59	0.68	1.08	1.59	0.4	0.39	0.59	1.07					0.0837	0.0584	0.6864	0.446	0.4163	0.8649	0.0352	0.0237	0.0132	0.0114	0.6806	0.8461	0.3294	0.6131	0.9978	0.7901	0.4649	0.7737	0.3308
	337			methionine sulfoxide	LC/MS pos early	18374	C02989	HMDB02005	158980		0.62	0.58	0.59	0.94	0.95	1.02	0.51	0.63	0.4	1.24	0.78	0.63	1.52	1.26	1.67	1.04					0.3195	0.1515	0.1216	0.2218	0.1464	0.743	0.5693	0.217	0.6386	0.2167	0.9204	0.8666	0.0523	0.347	0.2005	0.5638	0.0052	0.1037	0.489
	338			N-acetylmethionine sulfoxide	LC/MS pos early	45428			193368		0.81	0.31	0.37	0.38	0.46	1.2	0.52	0.52	0.36	1	0.7	0.7	1.91	1.22	3.18	1.85					0.6298	0.2463	0.0001	0.0111	0.0035	0.2321	0.0006	0.0009	0.0125	0.0109	0.283	0.7603	0.019	0.2502	0.0345	0.3493	0.0008	0.0403	0.7999
	342			S-adenosylmethionine (SAM)	LC/MS pos early	15915	C00019	HMDB01185	34756		2.68	0.91	0.83	0.34	0.31	0.91	1.22	1.4	0.99	1.14	0.81	0.71	1.31	0.6	2.01	1.57					0.0233	0.0209	0.7925	0.463	0.5632	0.8871	0.0123	0.0096	0.0054	0.0057	0.7521	0.8554	0.7273	0.6889	0.5125	0.6828	0.7904	0.8134	0.7584
	343			S-adenosylhomocysteine (SAH)	LC/MS neg	42382	C00021	HMDB00939	439155		5.96	0.77	0.63	0.13	0.1	0.81	2.19	1.13	1.13	0.52	0.52	1	0.7	0.26	1.03	1.28					0.0002	0.0007	0.5497	0.3952	0.1823	0.8271	2.7395e-05	0.0001	2.4627e-06	3.7977e-05	0.4553	0.7775	0.0595	0.3695	0.7317	0.7271	0.6512	0.798	0.1187
	345			2,3-dihydroxy-5-methylthio-4-pentenoate (DMTPA)*	LC/MS neg	62805					1.04	0.87	0.89	0.84	0.85	1.02	0.62	0.67	0.49	1.08	0.8	0.74	1.35	0.8	1.04	0.76					0.5182	0.2144	0.5189	0.3851	0.8376	0.8989	0.2001	0.0991	0.3959	0.1511	0.6591	0.8461	0.251	0.5493	0.1251	0.5032	0.0232	0.2698	0.6902
	349			cystathionine	LC/MS pos early	15705	C02291	HMDB00099	439258		6.31	2.32	1.43	0.37	0.23	0.62	4.18	1.04	2.54	0.25	0.61	2.45	1.28	0.85	0.58	2.28					0.0104	0.0117	0.5182	0.3851	0.7712	0.8871	0.0481	0.0304	0.0212	0.0163	0.7214	0.851	0.0945	0.4538	0.5746	0.6931	0.6095	0.7874	0.0281
	351			cysteine	LC/MS pos early	1868	C00097	HMDB00574	5862		1.24	0.79	0.97	0.64	0.79	1.23	5.54	0.99	1.5	0.18	0.27	1.51	0.84	3.77	1.05	1.29					0.3903	0.1755	0.7342	0.455	0.9214	0.9027	0.2332	0.1118	0.3389	0.1343	0.8096	0.8554	0.0867	0.4413	0.7043	0.7192	0.537	0.7749	0.0386
	353			S-methylcysteine	LC/MS pos early	39592		HMDB02108	24417		1.97	1.22	1.09	0.62	0.55	0.9	1.33	1.09	1.14	0.82	0.86	1.05	2.07	1.4	1.86	2.17					0.0327	0.0272	0.9292	0.5125	0.7238	0.8871	0.0266	0.0184	0.0706	0.0394	0.6585	0.8461	0.563	0.6611	0.8448	0.7598	0.8549	0.8189	0.7014
	354			S-methylcysteine sulfoxide	LC/MS pos early	43378		HMDB29432	82142		0.57	1.44	0.94	2.51	1.63	0.65	1.63	1.88	2.34	1.15	1.44	1.24	1.11	3.15	1.45	2.77					0.5216	0.2154	0.9889	0.5249	0.8648	0.9027	0.5307	0.2066	0.4183	0.1577	0.8538	0.8554	0.2635	0.5649	0.0824	0.4411	0.0778	0.4553	0.5211
	357			cystine	LC/MS pos early	56	C00491	HMDB00192	67678		0.16	0.15	1.38	0.93	8.6	9.26	10.46	0.35	0.43	0.03	0.04	1.22	0.96	62.89	2.25	0.3					0.0391	0.0313	0.0645	0.1714	0.7492	0.8871	0.8176	0.2819	0.0776	0.0425	0.1222	0.7378	0.9688	0.7468	0.0561	0.3894	0.131	0.5546	0.0516
	360			lanthionine	LC/MS pos early	42002			98504		6.47	2.34	7.29	0.36	1.13	3.11	41.69	25.96	11.24	0.62	0.27	0.43	0.44	2.86	4.93	0.69					0.05	0.0375	0.8704	0.4911	0.4537	0.8649	0.0707	0.0418	0.2135	0.0938	0.5569	0.8385	0.0063	0.1823	0.3455	0.6484	0.0869	0.4637	0.0612
	362			cysteine sulfinic acid	LC/MS pos early	37443	C00606	HMDB00996	109		5.87	1.85	1.19	0.32	0.2	0.64	5.21	0.75	2.26	0.14	0.43	3.03	0.97	0.86	0.39	1.84					0.0028	0.0046	0.3246	0.3133	0.5756	0.8871	0.0347	0.0236	0.0124	0.0109	0.6674	0.8461	0.0078	0.1823	0.8774	0.7665	0.1257	0.5371	0.0052
	363			hypotaurine	LC/MS polar	590	C00519	HMDB00965	107812		0.93	1.03	1	1.11	1.08	0.97	3.22	1.48	2	0.46	0.62	1.36	0.6	2.07	0.86	1.2					0.3564	0.1637	0.3516	0.3268	0.3687	0.86	0.9924	0.3196	0.9811	0.2981	0.9736	0.8784	0.0235	0.2502	0.5561	0.6897	0.1574	0.6118	0.0858
	364			taurine	LC/MS neg	2125	C00245	HMDB00251	1123		1.71	1.04	0.78	0.61	0.46	0.75	1.14	0.83	0.91	0.73	0.8	1.11	1.11	0.74	0.89	1.3					0.0088	0.0104	0.8114	0.4694	0.2702	0.8454	0.016	0.012	0.0004	0.0008	0.182	0.7603	0.6434	0.6738	0.2916	0.6103	0.6486	0.798	0.1326
	365			N-acetyltaurine	LC/MS neg	48187			159864		1.46	0.68	0.96	0.46	0.65	1.41	0.92	0.74	0.77	0.8	0.83	1.04	1.05	0.66	1.14	0.84					0.0163	0.0163	0.1568	0.2439	0.9098	0.9027	0.0003	0.0005	0.0215	0.0164	0.1274	0.7378	0.748	0.6963	0.1291	0.5032	0.2061	0.6623	0.2274
	367			taurocyamine	LC/MS pos early	35117	C01959	HMDB03584	68340		3.51	1.03	0.92	0.29	0.26	0.9	1.66	1.05	1.12	0.63	0.68	1.07	1.09	0.51	1.11	1.32					0.0006	0.0015	0.7264	0.4541	0.9289	0.9027	0.0015	0.0017	0.0007	0.0012	0.7942	0.8554	0.4906	0.6496	0.9944	0.7901	0.7793	0.8134	0.4949
	371		Urea cycle; Arginine and Proline Metabolism	arginine	LC/MS pos early	1638	C00062	HMDB00517	232		0.45	1.1	1.06	2.47	2.38	0.96	0.83	1.52	0.62	1.82	0.74	0.41	1.54	2.88	2.12	0.9					0.0015	0.0031	0.773	0.4595	0.7176	0.8871	0.0007	0.0009	0.0005	0.001	0.9415	0.8683	0.2709	0.5703	0.5339	0.6828	0.5736	0.7773	0.0889
	372			argininosuccinate	LC/MS pos early	15497	C03406	HMDB00052	828		0.7	0.78	0.54	1.12	0.78	0.7	1.84	1.92	1.43	1.04	0.78	0.75	0.8	2.1	1.95	2.09					0.1141	0.0718	0.6944	0.4482	0.3073	0.8454	0.2297	0.1108	0.5644	0.1974	0.5268	0.8193	0.5438	0.6611	0.1708	0.5607	0.4184	0.7458	0.4387
	373			urea	LC/MS pos early	1670	C00086	HMDB00294	1176		0.96	0.6	0.75	0.62	0.78	1.25	0.77	0.75	0.73	0.98	0.95	0.97	1.14	0.92	1.44	1.12					0.6101	0.2411	0.0746	0.1824	0.4914	0.8649	0.0241	0.0169	0.2339	0.0992	0.2626	0.7603	0.4745	0.6496	0.4275	0.6652	0.3428	0.745	0.9368
	375			ornithine	LC/MS pos early	1493	C00077	HMDB03374	6262		1.78	0.43	0.84	0.24	0.47	1.94	1.17	0.76	0.82	0.65	0.7	1.08	1.01	0.67	1.78	0.99					0.0641	0.0468	0.0101	0.0984	0.4056	0.8649	4.1394e-05	0.0001	0.009	0.0083	0.0703	0.7068	0.6625	0.6741	0.3498	0.6502	0.5209	0.7737	0.1735
	379			2-oxoarginine*	LC/MS pos early	55072	C03771	HMDB04225	558		2.68	0.84	0.81	0.31	0.3	0.96	0.93	0.93	0.62	1	0.66	0.66	1.14	0.39	1.26	0.87					0.0006	0.0016	0.2129	0.2673	0.3868	0.8649	1.2614e-05	7.9218e-05	4.336e-05	0.0001	0.6981	0.8461	0.7199	0.6877	0.8201	0.7571	0.0538	0.3982	0.8954
	380			citrulline	LC/MS pos early	2132	C00327	HMDB00904	9750		1.02	1.01	1.08	0.99	1.06	1.07	1.17	0.84	0.86	0.72	0.74	1.02	1.18	1.35	0.99	0.94					0.8973	0.3179	0.9338	0.5133	0.7598	0.8871	0.8321	0.283	0.8597	0.2721	0.6976	0.8461	0.6383	0.6738	0.4194	0.6652	0.5377	0.7749	0.734
	382			homocitrulline	LC/MS pos early	22138	C02427	HMDB00679	65072		2.18	1.13	0.82	0.52	0.38	0.73	3.33	1.77	1.75	0.53	0.52	0.99	0.76	1.15	1.19	1.61					0.1571	0.0911	0.5396	0.391	0.8052	0.8942	0.4152	0.177	0.0987	0.0522	0.3911	0.7603	0.4621	0.6496	0.2609	0.5994	0.3471	0.745	0.6929
	383			proline	LC/MS pos early	1898	C00148	HMDB00162	145742		1.13	0.6	0.72	0.53	0.63	1.18	1.23	1.35	0.79	1.1	0.65	0.59	1	1.09	2.24	1.11					0.3213	0.152	0.0919	0.1941	0.2537	0.8454	0.0093	0.0079	0.0366	0.0242	0.5727	0.8385	0.4952	0.6496	0.4639	0.68	0.2864	0.7184	0.9595
	386			dimethylarginine (SDMA + ADMA)	LC/MS pos early	36808	C03626	HMDB01539	123831		1.09	0.47	0.44	0.43	0.41	0.95	1.56	1.49	0.86	0.96	0.55	0.58	0.85	1.21	2.69	1.64					0.4938	0.2076	0.0447	0.1585	0.0939	0.6574	0.0086	0.0075	0.0208	0.0162	0.7227	0.851	0.2272	0.5472	0.4238	0.6652	0.6162	0.7896	0.6779
	387			N-acetylarginine	LC/MS pos early	33953	C02562	HMDB04620	67427		0.89	0.71	1.51	0.79	1.69	2.13	4.05	0.99	1.04	0.24	0.26	1.06	0.88	3.98	1.23	0.61					0.7878	0.2909	0.6605	0.4378	0.5148	0.8711	0.4797	0.1939	0.7013	0.2306	0.278	0.7603	0.1432	0.4971	0.9596	0.7866	0.7283	0.8006	0.1304
	390			N-acetylcitrulline	LC/MS neg	48434	C15532	HMDB00856	656979		6.14	0.36	1.71	0.06	0.28	4.81	7.34	0.17	0.17	0.02	0.02	0.95	2.37	2.83	1.15	0.23					0.1274	0.0771	0.2633	0.2903	0.5713	0.8871	0.0103	0.0086	0.33	0.132	0.0959	0.7325	0.5887	0.6632	0.1919	0.5609	0.1888	0.6487	0.0685
	393			N-alpha-acetylornithine	LC/MS pos early	32984	C00437	HMDB03357	439232		14	0.79	2.02	0.06	0.14	2.55	2.9	0.41	0.25	0.14	0.09	0.62	1.99	0.41	1.02	0.25					0.0007	0.0016	0.4946	0.3778	0.3336	0.8454	8.2132e-05	0.0002	0.0097	0.0089	0.1031	0.7342	0.2304	0.5472	0.189	0.5607	0.1029	0.4784	0.0146
	397			trans-4-hydroxyproline	LC/MS pos early	32306	C01157	HMDB00725	5810		0.37	0.44	0.64	1.18	1.74	1.48	0.79	1.48	0.96	1.88	1.22	0.65	0.79	1.69	2.7	1.19					0.0005	0.0014	0.1034	0.2077	0.3445	0.8454	0.0409	0.0262	0.0074	0.0072	0.4818	0.8018	0.9938	0.7488	0.2253	0.5781	0.6478	0.798	0.2225
	399			pro-hydroxy-pro	LC/MS pos early	35127		HMDB06695	11673055		0.27	0.32	0.58	1.2	2.14	1.78	0.48	1.17	0.65	2.42	1.35	0.56	0.8	1.43	2.88	0.9					0.0076	0.0094	0.0454	0.1585	0.4168	0.8649	0.4605	0.19	0.0534	0.0317	0.2203	0.7603	0.3756	0.6315	0.5251	0.6828	0.8128	0.8152	0.1321
	402			N-methylproline	LC/MS pos early	37431			557		1.14	0.96	0.89	0.84	0.78	0.93	2.4	1.48	0.67	0.62	0.28	0.45	0.81	1.7	1.25	0.61					0.8222	0.3002	0.8672	0.4911	0.6319	0.8871	0.6953	0.2488	0.4825	0.1749	0.7549	0.8554	0.1097	0.4657	0.263	0.5994	0.5253	0.7737	0.6195
	404			N-monomethylarginine	LC/MS pos early	43586	C03884	HMDB29416	132862		1.05	0.63	0.57	0.6	0.54	0.9	1.39	1.41	0.9	1.01	0.65	0.64	0.88	1.17	1.98	1.41					0.5429	0.2208	0.1642	0.244	0.1924	0.8271	0.049	0.0309	0.0595	0.0343	0.9277	0.8666	0.3611	0.6315	0.4359	0.6652	0.6693	0.798	0.8919
	405			argininate*	LC/MS pos early	57461		HMDB03148	160437		29.82	0.87	0.87	0.03	0.03	0.99	5.01	0.61	0.58	0.12	0.12	0.96	1.6	0.27	1.12	1.08					4.8306e-05	0.0003	0.8432	0.4794	0.8375	0.8989	2.5842e-05	0.0001	2.5245e-05	0.0001	0.9941	0.8797	0.5022	0.6496	0.4888	0.6828	0.4605	0.7737	0.1765
	408			N-acetylhomocitrulline	LC/MS pos early	62707					5.63	0.38	0.93	0.07	0.17	2.48	6.18	0.28	0.34	0.05	0.05	1.21	2.04	2.25	1.53	0.74					0.0431	0.0332	0.3726	0.3328	0.9638	0.9074	0.0047	0.0045	0.0476	0.029	0.3491	0.7603	0.5075	0.65	0.3383	0.645	0.417	0.7458	0.1093
	409			dimethylguanidino valeric acid (DMGV)*	LC/MS pos early	62783					0.17	0.19	0.3	1.12	1.78	1.59	0.12	0.1	0.08	0.84	0.67	0.81	1.49	1.07	0.8	0.4					0.0041	0.006	0.0091	0.0974	0.0762	0.6384	0.7636	0.2669	0.2282	0.0981	0.3625	0.7603	2.3304e-06	0.001	1.2059e-06	0.0005	3.3839e-07	0.0002	0.8394
	410		Creatine Metabolism	guanidinoacetate	LC/MS pos early	43802	C00581	HMDB00128	763		0.87	0.63	1.42	0.72	1.64	2.27	7.2	2.38	1.43	0.33	0.2	0.6	0.75	6.24	2.85	0.75					0.747	0.2807	0.3617	0.3291	0.6983	0.8871	0.5533	0.2136	0.4786	0.1739	0.1967	0.7603	0.0074	0.1823	0.0653	0.4097	0.3012	0.7314	0.3596
	411			creatine	LC/MS pos early	27718	C00300	HMDB00064	586		0.56	1.06	0.87	1.89	1.55	0.82	0.75	0.94	0.8	1.25	1.07	0.86	1.29	1.73	1.14	1.2					0.0111	0.0123	0.9969	0.5253	0.6868	0.8871	0.011	0.009	0.0295	0.0205	0.684	0.8461	0.2371	0.5472	0.808	0.7543	0.4751	0.7737	0.345
	412			creatinine	LC/MS pos early	513	C00791	HMDB00562	588		0.66	0.95	0.89	1.45	1.36	0.94	0.86	0.99	0.79	1.15	0.91	0.8	1.25	1.64	1.29	1.1					0.0869	0.0605	0.638	0.4307	0.8483	0.8989	0.2075	0.102	0.126	0.0634	0.7797	0.8554	0.5871	0.6632	0.9707	0.7873	0.5068	0.7737	0.5622
	413			creatine phosphate	LC/MS polar	33951	C02305	HMDB01511	587		0.3	0.41	0.98	1.38	3.3	2.39	0.34	1.11	1.93	3.23	5.63	1.74	0.76	0.88	2.07	1.5					0.04	0.0316	0.2402	0.2756	0.9199	0.9027	0.3577	0.1569	0.0319	0.0215	0.2033	0.7603	0.4129	0.6315	0.4422	0.6652	0.0718	0.4418	0.1167
	418		Polyamine Metabolism	putrescine	LC/MS pos early	1408	C00134	HMDB01414	1045		0.62	0.95	1.06	1.52	1.7	1.11	0.82	1.28	1.42	1.56	1.73	1.11	1.49	1.96	2	2					0.3512	0.1617	0.6719	0.4401	0.9598	0.9053	0.6083	0.2266	0.3262	0.1308	0.6357	0.8461	0.6063	0.6636	0.5661	0.6897	0.5691	0.7773	0.2787
	420			N-acetyl-isoputreanine*	LC/MS pos early	62309					3.15	0.86	1.22	0.27	0.39	1.42	0.5	0.15	0.11	0.3	0.22	0.73	9.86	1.55	1.7	0.88					0.0062	0.008	0.6662	0.4387	0.4613	0.8649	0.0019	0.002	0.0379	0.0245	0.2456	0.7603	0.5366	0.659	0.0122	0.2763	0.0014	0.0469	0.0523
	421			spermidine	LC/MS pos early	485	C00315	HMDB01257	1102		0.97	0.55	0.98	0.56	1	1.79	1.29	3.3	1.1	2.57	0.86	0.33	0.97	1.28	5.86	1.1					0.5373	0.2192	0.2441	0.2776	0.8611	0.9027	0.0787	0.0455	0.6579	0.2219	0.182	0.7603	0.5187	0.6579	0.1127	0.5032	0.7902	0.8134	0.3376
	423			N('1)-acetylspermidine	LC/MS pos early	57689	C00612	HMDB01276	496		1.03	0.52	0.74	0.5	0.72	1.42	0.69	0.6	0.54	0.87	0.77	0.89	2.11	1.42	2.46	1.54					0.2829	0.14	0.363	0.3291	0.6936	0.8871	0.0514	0.032	0.1453	0.0706	0.6036	0.8385	0.5634	0.6611	0.4002	0.6652	0.1997	0.6623	0.7903
	426			spermine	LC/MS pos late	603	C00750	HMDB01256	1103		0.61	0.46	3.14	0.75	5.15	6.85	0.9	28.81	3.3	31.9	3.65	0.11	0.65	0.96	40.71	0.68					0.7042	0.2693	0.4012	0.3488	0.6007	0.8871	0.6436	0.2363	0.3683	0.143	0.1764	0.7603	0.9901	0.7488	0.0171	0.2763	0.1902	0.6487	0.0176
	429			5-methylthioadenosine (MTA)	LC/MS pos early	1419	C00170	HMDB01173	439176		2.46	1.13	1.55	0.46	0.63	1.37	1.42	1.55	1.63	1.09	1.15	1.05	0.98	0.57	1.35	1.03					0.0371	0.0301	0.7537	0.458	0.4921	0.8649	0.0178	0.0132	0.1512	0.0733	0.3189	0.7603	0.4999	0.6496	0.3234	0.6313	0.3726	0.7458	0.7514
	430			N-acetylputrescine	LC/MS pos early	37496	C02714	HMDB02064	122356		0.47	1.44	1.33	3.03	2.8	0.92	0.69	1.03	1.67	1.51	2.43	1.61	2.09	3.02	1.5	2.62					0.044	0.0335	0.9616	0.5186	0.7289	0.8871	0.0395	0.0255	0.0197	0.0156	0.7653	0.8554	0.7148	0.6877	0.772	0.7439	0.555	0.7773	0.5133
	439		Guanidino and Acetamido Metabolism	4-guanidinobutanoate	LC/MS pos early	15681	C01035	HMDB03464	500		43.21	3.84	1.62	0.09	0.04	0.42	1.51	1.4	0.58	0.92	0.38	0.42	1.22	0.04	0.44	0.44					1.5512e-07	1.7325e-05	0.0039	0.0734	0.1226	0.6884	0.0021	0.0022	2.4801e-05	0.0001	0.1453	0.7406	0.4347	0.6455	0.6365	0.7037	0.2023	0.6623	0.7561
	442		Glutathione Metabolism	glutathione, reduced (GSH)	LC/MS pos early	2127	C00051	HMDB00125	124886		18.65	1.94	1.1	0.1	0.06	0.57	5.08	2.34	2.23	0.46	0.44	0.95	1.08	0.29	1.3	2.18					0.0017	0.0033	0.3651	0.3291	0.3394	0.8454	0.0189	0.0137	9.7398e-05	0.0003	0.067	0.7068	0.2285	0.5472	0.3285	0.6345	0.691	0.798	0.8162
	443			glutathione, oxidized (GSSG)	LC/MS pos early	27727	C00127	HMDB03337	65359		2.59	0.85	0.69	0.33	0.27	0.81	1.92	1.47	1.1	0.77	0.57	0.75	1.03	0.76	1.79	1.64					0.0328	0.0272	0.7471	0.4568	0.3269	0.8454	0.0152	0.0115	0.0027	0.0033	0.5081	0.8178	0.6163	0.671	0.2309	0.5781	0.6084	0.7874	0.4809
	445			cysteine-glutathione disulfide	LC/MS pos early	35159		HMDB00656	4247235		0.45	0.35	0.77	0.79	1.72	2.19	0.77	0.55	0.52	0.71	0.67	0.94	1.16	2.01	1.82	0.78					0.1858	0.1022	0.0261	0.1379	0.4191	0.8649	0.3409	0.1512	0.5992	0.2069	0.1431	0.7406	0.4588	0.6496	0.0655	0.4097	0.0984	0.4685	0.2587
	446			S-methylglutathione	LC/MS neg	33944	C11347		3605667		39.17	1.28	0.67	0.03	0.02	0.52	22.11	1.1	1.32	0.05	0.06	1.2	0.88	0.5	0.76	1.74					4.7963e-05	0.0003	0.5198	0.3851	0.717	0.8871	0.0004	0.0005	1.5164e-05	9.1556e-05	0.3165	0.7603	0.1564	0.5061	0.8619	0.7598	0.8567	0.8189	0.2116
	447			S-lactoylglutathione	LC/MS neg	15731	C03451	HMDB01066	440018		1.68	0.62	0.24	0.37	0.14	0.39	3.03	3.33	2.3	1.1	0.76	0.69	0.48	0.87	2.61	4.62					0.1099	0.0698	0.9924	0.525	0.2361	0.8454	0.112	0.0607	0.0071	0.007	0.2325	0.7603	0.2714	0.5703	0.1846	0.5607	0.1654	0.6376	0.8156
	448			cysteinylglycine	LC/MS pos early	35637	C01419	HMDB00078	439498		7.72	1.1	1.25	0.14	0.16	1.13	2.26	0.91	1.35	0.41	0.6	1.48	1.3	0.38	1.08	1.4					0.0112	0.0123	0.9631	0.5186	0.8657	0.9027	0.01	0.0083	0.017	0.014	0.8295	0.8554	0.2203	0.5472	0.8997	0.7741	0.5777	0.7781	0.27
	451			5-oxoproline	LC/MS neg	1494	C01879	HMDB00267	7405		1.4	0.73	1.17	0.52	0.84	1.6	2.45	1.05	1.45	0.43	0.59	1.38	0.89	1.57	1.28	1.1					0.1812	0.1	0.3882	0.3405	0.9512	0.9027	0.0312	0.0214	0.2013	0.0899	0.3559	0.7603	0.0644	0.3779	0.8779	0.7665	0.4013	0.7458	0.0883
	454			2-hydroxybutyrate/2-hydroxyisobutyrate	LC/MS polar	52281					11.82	0.66	0.81	0.06	0.07	1.24	0.58	0.15	0.19	0.26	0.33	1.26	4.73	0.23	1.1	1.12					3.994e-05	0.0003	0.4891	0.3755	0.868	0.9027	4.334e-06	4.6029e-05	2.3589e-05	0.0001	0.5983	0.8385	0.1853	0.5149	0.0041	0.1779	0.0166	0.2223	0.0978
	456			ophthalmate	LC/MS pos early	34592		HMDB05765	7018721		9.78	1.23	0.89	0.13	0.09	0.72	1.53	0.9	0.47	0.59	0.31	0.52	2.32	0.36	1.7	1.23					0.0006	0.0015	0.8055	0.4678	0.5451	0.8867	0.0012	0.0014	9.1488e-05	0.0003	0.3959	0.7603	0.8233	0.7093	0.6546	0.7054	0.3355	0.745	0.5033
	459			4-hydroxy-nonenal-glutathione	LC/MS neg	48487					1.48	1.19	1.03	0.8	0.69	0.87	0.66	0.88	0.38	1.33	0.58	0.43	2.84	1.27	2.12	1.06					0.1698	0.0958	0.5359	0.3909	0.839	0.8989	0.4436	0.1852	0.1169	0.0595	0.412	0.7603	0.4469	0.6496	0.8427	0.7598	0.0373	0.3344	0.3389
	460			3'-dephospho-CoA-glutathione*	LC/MS neg	62807					5.4	1.13	0.78	0.21	0.14	0.68	2.73	1.27	1.15	0.47	0.42	0.9	0.95	0.48	1.06	1.4					0.0061	0.008	0.6642	0.4383	0.6207	0.8871	0.0184	0.0135	0.0016	0.0022	0.3548	0.7603	0.3837	0.6315	0.5438	0.6843	0.6752	0.798	0.7898
	461			CoA-glutathione*	LC/MS neg	62804	C00920		11953788		4.5	1.21	0.98	0.27	0.22	0.81	3.06	1.77	2.04	0.58	0.67	1.15	0.57	0.39	0.84	1.2					0.0153	0.0154	0.5264	0.3875	0.4874	0.8649	0.0654	0.0392	0.0024	0.0031	0.1878	0.7603	0.2161	0.5472	0.2162	0.5696	0.0929	0.4637	0.9999
	465	Peptide	Gamma-glutamyl Amino Acid	gamma-glutamylalanine	LC/MS pos early	37063		HMDB29142	440103		0.36	0.58	1.35	1.62	3.76	2.31	1.13	0.31	0.87	0.27	0.77	2.83	0.85	2.68	0.45	0.55					0.2116	0.1127	0.6557	0.4376	0.6459	0.8871	0.4169	0.1773	0.0909	0.0491	0.3672	0.7603	0.6784	0.6741	0.0585	0.3962	0.4008	0.7458	0.134
	467			gamma-glutamylglutamate	LC/MS pos early	36738	C05282	HMDB11737	92865		0.95	0.76	0.84	0.79	0.88	1.11	1.33	0.88	1.59	0.66	1.19	1.81	0.67	0.93	0.77	1.26					0.6764	0.2618	0.5129	0.3851	0.6595	0.8871	0.2863	0.132	0.3925	0.1509	0.8298	0.8554	0.3704	0.6315	0.992	0.7897	0.3287	0.745	0.3757
	468			gamma-glutamylglutamine	LC/MS pos early	2730	C05283	HMDB11738	150914		0.42	0.65	1.29	1.58	3.11	1.98	0.92	0.46	1.32	0.5	1.44	2.85	0.84	1.86	0.59	0.86					0.0211	0.0196	0.4427	0.3619	0.7301	0.8871	0.112	0.0607	0.009	0.0083	0.2683	0.7603	0.5111	0.6502	0.0759	0.4378	0.8027	0.8149	0.2532
	469			gamma-glutamylglycine	LC/MS pos early	33949		HMDB11667	165527		0.64	0.68	1.48	1.05	2.3	2.18	2.5	1.36	2.2	0.54	0.88	1.61	0.68	2.66	1.37	1.01					0.2531	0.1306	0.5876	0.4077	0.721	0.8871	0.5435	0.2103	0.1366	0.0674	0.3702	0.7603	0.5899	0.6632	0.9047	0.7741	0.3095	0.7314	0.5106
	470			gamma-glutamylhistidine	LC/MS pos early	18245			7017195		0.64	0.48	1.41	0.75	2.21	2.94	2.59	0.61	1.19	0.24	0.46	1.96	0.9	3.63	1.13	0.76					0.4683	0.1998	0.2333	0.2756	0.7688	0.8871	0.6353	0.2343	0.3101	0.1258	0.1399	0.7378	0.5216	0.659	0.2899	0.6103	0.9764	0.8427	0.0933
	471			gamma-glutamylisoleucine*	LC/MS pos early	34456		HMDB11170	14253342		1.58	0.49	1.21	0.31	0.77	2.46	1.63	0.55	0.83	0.34	0.51	1.5	1.29	1.33	1.44	0.88					0.1011	0.0667	0.0453	0.1585	0.8694	0.9027	0.0006	0.0008	0.1383	0.0678	0.0313	0.6723	0.4545	0.6496	0.1483	0.5356	0.5009	0.7737	0.0315
	472			gamma-glutamylleucine	LC/MS pos early	18369		HMDB11171	151023		2.4	0.55	1.03	0.23	0.43	1.85	1.33	0.55	0.66	0.41	0.5	1.22	1.4	0.78	1.39	0.91					0.0126	0.0131	0.174	0.2497	0.9506	0.9027	0.0003	0.0004	0.0147	0.0126	0.1558	0.7603	0.4533	0.6496	0.3428	0.6479	0.4166	0.7458	0.0936
	473			gamma-glutamyl-alpha-lysine	LC/MS pos early	55015			65254		0.4	0.35	1.11	0.88	2.77	3.15	0.9	0.49	0.52	0.55	0.58	1.05	1.21	2.71	1.71	0.57					0.1081	0.069	0.028	0.1404	0.7723	0.8871	0.5281	0.2065	0.1839	0.0845	0.0536	0.7068	0.1812	0.5138	0.1767	0.5607	0.1871	0.6487	0.9884
	474			gamma-glutamyl-epsilon-lysine	LC/MS pos early	33934		HMDB03869	7015685		0.56	0.38	0.38	0.69	0.69	1	0.94	1.06	0.62	1.13	0.66	0.59	0.87	1.48	2.41	1.42					0.372	0.1693	0.037	0.1548	0.1911	0.8271	0.2169	0.1063	0.6717	0.223	0.4127	0.7603	0.9733	0.7479	0.9888	0.7897	0.5259	0.7737	0.9845
	475			gamma-glutamylmethionine	LC/MS pos early	44872		HMDB29155	7009567		0.61	0.89	2.13	1.45	3.48	2.39	0.99	0.25	0.7	0.25	0.71	2.79	1.9	3.06	0.54	0.62					0.2721	0.1364	0.7526	0.458	0.29	0.8454	0.1602	0.0828	0.0347	0.023	0.4548	0.7775	0.713	0.6877	0.0504	0.3894	0.5635	0.7773	0.1074
	476			gamma-glutamylphenylalanine	LC/MS pos early	33422		HMDB00594	111299		0.83	0.49	0.86	0.59	1.04	1.75	1.05	0.48	0.66	0.46	0.62	1.35	1.31	1.66	1.29	0.99					0.9306	0.3255	0.2164	0.2676	0.7055	0.8871	0.1866	0.094	0.6422	0.2174	0.3866	0.7603	0.7674	0.6975	0.1305	0.5032	0.2686	0.7007	0.2199
	477			gamma-glutamylthreonine	LC/MS pos early	33364		HMDB29159	76078708		0.83	0.68	1.17	0.82	1.41	1.72	2.54	0.82	1.17	0.32	0.46	1.41	0.82	2.51	0.99	0.82					0.773	0.2876	0.2806	0.292	0.9344	0.9027	0.4265	0.1797	0.8366	0.2673	0.3181	0.7603	0.188	0.5192	0.7846	0.7467	0.8114	0.8152	0.1143
	478			gamma-glutamyltryptophan	LC/MS pos early	33947		HMDB29160	3989307		0.51	0.68	1.03	1.34	2.03	1.52	1.25	0.6	0.83	0.48	0.66	1.38	1.16	2.84	1.03	0.93					0.0253	0.0222	0.3282	0.3137	0.6417	0.8871	0.1895	0.0949	0.0709	0.0394	0.6053	0.8385	0.7698	0.6975	0.4277	0.6652	0.7389	0.805	0.2797
	479			gamma-glutamyltyrosine	LC/MS neg	2734		HMDB11741	94340		0.4	0.43	1.1	1.08	2.74	2.55	1.33	0.23	0.35	0.18	0.26	1.49	2.22	7.38	1.2	0.7					0.0962	0.0646	0.1274	0.2269	0.7498	0.8871	0.8838	0.2935	0.1744	0.0821	0.2238	0.7603	0.4337	0.6455	0.0151	0.2763	0.0671	0.43	0.0879
	480			gamma-glutamylvaline	LC/MS pos early	43829		HMDB11172	7015683		1.56	0.52	1.12	0.33	0.72	2.14	1.77	0.52	0.87	0.29	0.49	1.68	1.2	1.36	1.19	0.93					0.118	0.0734	0.0643	0.1714	0.9134	0.9027	0.0012	0.0014	0.0956	0.0512	0.0805	0.7205	0.2893	0.5771	0.0714	0.4299	0.5357	0.7749	0.0056
	481			gamma-glutamylserine	LC/MS pos early	54914					0.54	0.53	1.15	0.99	2.12	2.14	1.32	0.53	1.17	0.4	0.89	2.23	0.94	2.3	0.93	0.96					0.0252	0.0222	0.3289	0.3137	0.9795	0.9106	0.1889	0.0949	0.0268	0.0191	0.3416	0.7603	0.9426	0.7443	0.2779	0.6103	0.8609	0.8189	0.3104
	630		Dipeptide	glycylisoleucine	LC/MS pos early	36659		HMDB28844	88079		4.78	0.59	0.46	0.12	0.1	0.79	1.56	1.5	0.2	0.96	0.13	0.13	1.57	0.51	4.02	0.67					0.0008	0.0019	0.5851	0.4077	0.4911	0.8649	0.0002	0.0003	9.8684e-05	0.0003	0.8858	0.8554	0.3432	0.6297	0.6627	0.7054	0.065	0.4283	0.6061
	631			glycylleucine	LC/MS pos early	34398	C02155	HMDB00759	92843		1.85	0.53	0.61	0.28	0.33	1.15	0.85	1.24	0.34	1.46	0.4	0.27	1.97	0.91	4.64	1.1					0.0751	0.0532	0.143	0.2388	0.3341	0.8454	0.0019	0.002	0.0077	0.0074	0.6083	0.8401	0.934	0.7402	0.9784	0.7888	0.0381	0.3344	0.9555
	641			glycylvaline	LC/MS pos early	18357		HMDB28854	97417		2.02	0.5	0.53	0.25	0.26	1.06	0.89	0.95	0.28	1.07	0.32	0.3	1.9	0.83	3.58	1					0.0432	0.0332	0.1064	0.2084	0.2067	0.8337	0.0006	0.0008	0.0017	0.0023	0.7147	0.851	0.8792	0.7268	0.7177	0.7212	0.0172	0.2223	0.608
	646			histidylalanine	LC/MS pos early	42027		HMDB28878	351667		0.74	0.78	0.72	1.04	0.96	0.92	0.83	0.75	0.23	0.89	0.28	0.31	1.99	2.23	1.91	0.65					0.7878	0.2909	0.512	0.3851	0.7947	0.8927	0.6981	0.2493	0.9929	0.2997	0.6915	0.8461	0.4142	0.6315	0.5168	0.6828	0.0101	0.1706	0.865
	665			isoleucylglycine	LC/MS neg	40008		HMDB28907	342532		1.08	0.63	0.74	0.58	0.68	1.17	0.86	1.52	0.4	1.78	0.46	0.26	2.36	1.88	5.69	1.28					0.7042	0.2693	0.265	0.2903	0.2438	0.8454	0.4589	0.1898	0.4281	0.1603	0.9583	0.8741	0.8626	0.7201	0.8215	0.7571	0.0833	0.4637	0.6903
	684			leucylglycine	LC/MS pos early	40045		HMDB28929	79070		1.09	0.89	0.95	0.82	0.88	1.07	0.86	1.1	0.48	1.29	0.56	0.43	1.83	1.44	2.26	0.92					0.4824	0.2045	0.988	0.5249	0.9337	0.9027	0.4732	0.193	0.4326	0.1613	0.9456	0.8683	0.4803	0.6496	0.8398	0.7598	0.2629	0.7007	0.6135
	733			phenylalanylalanine	LC/MS neg	41374			5488196		0.99	0.6	0.53	0.61	0.54	0.88	0.68	1.13	0.35	1.66	0.52	0.31	1.91	1.31	3.59	1.26					0.4292	0.1869	0.1349	0.2332	0.1356	0.7317	0.4713	0.1927	0.4732	0.1722	0.9976	0.8797	0.3172	0.601	0.8472	0.7598	0.0447	0.359	0.2346
	737			phenylalanylglycine	LC/MS pos early	41370		HMDB28995	98207		1.01	0.44	0.65	0.43	0.64	1.49	0.74	1.1	0.31	1.49	0.42	0.28	2.37	1.73	5.98	1.12					0.5527	0.2244	0.1046	0.2077	0.4294	0.8649	0.2947	0.1352	0.8428	0.2687	0.3937	0.7603	0.5259	0.659	0.8958	0.774	0.0594	0.419	0.4449
	756			prolylglycine	LC/MS pos early	40703		HMDB11178	6426709		1.5	0.51	0.49	0.34	0.33	0.96	1.2	1.59	0.55	1.33	0.46	0.35	1.43	1.14	4.46	1.59					0.1077	0.0689	0.1929	0.2576	0.1263	0.6884	0.005	0.0047	0.0026	0.0033	0.8138	0.8554	0.4896	0.6496	0.3966	0.6652	0.1227	0.5287	0.874
	794			threonylphenylalanine	LC/MS neg	31530		HMDB29068	4099799		1.11	1.15	0.79	1.04	0.71	0.69	0.59	0.91	0.13	1.53	0.21	0.14	3	1.61	2.37	0.48					0.9856	0.3379	0.5603	0.3989	0.6199	0.8871	0.5724	0.2177	0.6326	0.216	0.9307	0.8666	0.3363	0.6231	0.7807	0.7462	0.0045	0.1037	0.2173
	804			tryptophylglycine	LC/MS pos early	43028		HMDB29083	263471		1.26	0.71	0.94	0.57	0.74	1.31	0.79	0.92	0.29	1.17	0.37	0.32	2.57	1.61	3.31	0.81					0.6991	0.269	0.4769	0.3726	0.8446	0.8989	0.2748	0.1284	0.5608	0.1969	0.6055	0.8385	0.8696	0.7231	0.6673	0.7054	0.0162	0.2223	0.553
	820			tyrosylglycine	LC/MS neg	41375		HMDB29105	259323		0.82	0.45	0.62	0.55	0.76	1.36	0.8	1.2	0.54	1.49	0.67	0.45	1.8	1.77	4.75	1.58					0.0396	0.0315	0.0495	0.1605	0.2661	0.8454	0.9193	0.3025	0.3235	0.13	0.3747	0.7603	0.6297	0.6738	0.6706	0.7054	0.4174	0.7458	0.366
	836			valylglutamine	LC/MS pos early	42079		HMDB29125	5253209		1.44	0.44	0.41	0.31	0.29	0.93	1.79	2.6	0.38	1.46	0.21	0.15	1.19	1.48	6.96	1.09					0.1474	0.086	0.3477	0.3242	0.1195	0.6884	0.0198	0.0142	0.0039	0.0044	0.5255	0.8193	0.1959	0.5315	0.3989	0.6652	0.079	0.4567	0.6462
	837			valylglycine	LC/MS pos early	40475		HMDB29127	136487		1.42	0.39	0.56	0.27	0.39	1.45	1.5	3.05	0.38	2.03	0.25	0.12	1.56	1.65	12.38	1.07					0.2882	0.1419	0.2753	0.2907	0.3537	0.8497	0.035	0.0237	0.0507	0.0306	0.8676	0.8554	0.0817	0.4369	0.096	0.4794	0.2935	0.7286	0.936
	840			valylleucine	LC/MS pos early	39994		HMDB29131	352039		0.83	0.6	0.59	0.72	0.71	0.99	0.75	1.22	0.21	1.63	0.29	0.18	1.87	1.68	3.82	0.68					0.9665	0.3332	0.1907	0.2562	0.2942	0.8454	0.2048	0.1009	0.3135	0.1265	0.7899	0.8554	0.8384	0.716	0.7024	0.719	0.0091	0.1596	0.5584
	929		Acetylated Peptides	phenylacetylglycine	LC/MS pos early	33945	C05598	HMDB00821	68144		1.18	0.49	0.78	0.41	0.67	1.61	0.76	0.64	0.45	0.84	0.59	0.7	1.53	0.99	2.01	0.87					0.4016	0.1781	0.1757	0.2509	0.6945	0.8871	0.0317	0.0216	0.2209	0.0961	0.3315	0.7603	0.1136	0.4657	0.197	0.563	0.0473	0.3697	0.7613
	955	Carbohydrate	Glycolysis, Gluconeogenesis, and Pyruvate Metabolism	1,5-anhydroglucitol (1,5-AG)	LC/MS neg	20675	C07326	HMDB02712	64960		0.99	0.89	1.08	0.9	1.09	1.21	0.9	1.12	0.99	1.25	1.1	0.88	1.02	0.93	1.28	0.93					0.7689	0.2867	0.7905	0.463	0.6694	0.8871	0.5764	0.2183	0.8939	0.2793	0.4895	0.8041	0.3827	0.6315	0.5936	0.6982	0.9234	0.826	0.1632
	958			glucose	LC/MS polar	48152	C00031	HMDB00122	79025		14.06	0.81	1.24	0.06	0.09	1.53	4.1	0.48	1.61	0.12	0.39	3.34	0.83	0.24	0.49	1.07					0.0016	0.0032	0.6773	0.4411	0.8262	0.8989	0.0005	0.0007	0.003	0.0036	0.5257	0.8193	0.1739	0.5138	0.2378	0.5835	0.3157	0.7346	0.0136
	959			glucose 6-phosphate	LC/MS polar	31260	C00668	HMDB01401	5958		12.17	0.59	0.32	0.05	0.03	0.54	0.72	0.43	0.43	0.6	0.6	1	2.71	0.16	1.98	3.65					0.0004	0.0011	0.1869	0.2534	0.26	0.8454	5.5678e-06	4.662e-05	1.0566e-05	8.9735e-05	0.8423	0.8554	0.6798	0.6741	0.2436	0.5881	0.1777	0.6415	0.4472
	962			fructose-6-phosphate	LC/MS polar	12021	C05345	HMDB00124	69507		8.71	0.46	0.35	0.05	0.04	0.76	1.28	0.6	0.76	0.47	0.59	1.25	1.53	0.23	2	3.31					0.0006	0.0015	0.2703	0.2903	0.2811	0.8454	1.8176e-05	8.7362e-05	1.9686e-05	9.8181e-05	0.98	0.8797	0.6487	0.6738	0.6077	0.7037	0.7059	0.798	0.3347
	965			fructose 1,6-diphosphate/glucose 1,6-diphosphate/myo-inositol diphosphates	LC/MS neg	46896	C00354				0.65	0.6	0.43	0.92	0.65	0.71	0.72	0.88	0.94	1.23	1.31	1.07	1.12	1.24	1.66	2.49					0.0662	0.0479	0.194	0.2576	0.0776	0.6384	0.5734	0.2177	0.9387	0.2894	0.6266	0.8461	0.2605	0.5615	0.8678	0.7618	0.6756	0.798	0.336
	967			dihydroxyacetone phosphate (DHAP)	LC/MS pos early	15522	C00111	HMDB01473	668		1.31	0.5	0.68	0.39	0.52	1.35	0.96	0.89	0.94	0.92	0.97	1.05	1.06	0.78	1.86	1.45					0.2711	0.1363	0.0133	0.1058	0.3141	0.8454	0.0006	0.0009	0.0389	0.025	0.1239	0.7378	0.8231	0.7093	0.9271	0.7741	0.8999	0.8237	0.7528
	971			2-phosphoglycerate	LC/MS polar	35629	C00631	HMDB03391	59		0.9	0.73	0.36	0.81	0.41	0.5	0.86	0.66	0.61	0.76	0.71	0.93	0.65	0.62	0.59	1.09					0.5349	0.2192	0.6454	0.4344	0.2195	0.8421	0.2824	0.1312	0.0684	0.0386	0.4379	0.7742	0.7871	0.705	0.8351	0.7598	0.8592	0.8189	0.6328
	972			3-phosphoglycerate	LC/MS neg	1414	C00597	HMDB00807	724		0.71	0.88	0.75	1.25	1.06	0.85	0.75	1	1.31	1.33	1.74	1.31	0.61	0.65	0.69	1.06					0.4667	0.1996	0.6327	0.429	0.1852	0.8271	0.8015	0.2785	0.5432	0.1924	0.3915	0.7603	0.5859	0.6632	0.4837	0.6828	0.4637	0.7737	0.8754
	973			phosphoenolpyruvate (PEP)	LC/MS neg	597	C00074	HMDB00263	1005		0.73	0.76	0.53	1.05	0.73	0.7	0.67	0.85	1.85	1.26	2.76	2.19	0.5	0.46	0.56	1.75					0.78	0.2897	0.5013	0.3809	0.1229	0.6884	0.6932	0.2485	0.2027	0.0903	0.3747	0.7603	0.4657	0.6496	0.3668	0.659	0.1515	0.5937	0.861
	974			pyruvate	LC/MS polar	48990	C00022	HMDB00243	1060		1.2	0.72	0.75	0.6	0.62	1.04	1.26	1.08	1.67	0.86	1.33	1.55	0.58	0.61	0.87	1.3					0.2625	0.1344	0.4076	0.3523	0.5852	0.8871	0.0554	0.0341	0.0994	0.0524	0.7758	0.8554	0.4128	0.6315	0.7669	0.7406	0.11	0.4942	0.5996
	975			lactate	LC/MS polar	527	C00186	HMDB00190	612		1.32	0.77	0.75	0.58	0.56	0.97	0.96	1.03	0.87	1.08	0.9	0.84	1.16	0.85	1.57	1.35					0.1282	0.0774	0.2837	0.2921	0.3442	0.8454	0.0118	0.0094	0.0162	0.0135	0.8977	0.8611	0.93	0.7402	0.9058	0.7741	0.5271	0.7737	0.8367
	978			glycerate	LC/MS polar	1572	C00258	HMDB00139	752		0.53	0.65	0.86	1.21	1.6	1.32	0.62	0.64	0.72	1.02	1.17	1.14	0.9	1.05	0.88	0.76					0.1007	0.0667	0.1554	0.2439	0.7158	0.8871	0.8177	0.2819	0.1965	0.0882	0.2859	0.7603	0.3173	0.601	0.2533	0.5953	0.5661	0.7773	0.8843
	981		Pentose Phosphate Pathway	6-phosphogluconate	LC/MS neg	15442	C00345	HMDB01316	91493		1.98	0.64	0.64	0.32	0.33	1	0.77	0.61	0.95	0.78	1.23	1.57	1.42	0.56	1.34	2.11					0.0587	0.0432	0.1833	0.2515	0.3385	0.8454	0.002	0.0021	0.0058	0.006	0.702	0.8461	0.9068	0.7338	0.5683	0.6897	0.8506	0.8189	0.6497
	984			ribose 1-phosphate	LC/MS polar	1763	C00620	HMDB01489	439236		6.25	1.26	1.16	0.2	0.19	0.93	1.1	1.01	0.95	0.92	0.86	0.93	1.58	0.28	1.27	1.28					0.0004	0.0011	0.6728	0.4401	0.9669	0.9087	0.0013	0.0015	0.0004	0.0009	0.7033	0.8461	0.5974	0.6636	0.8187	0.7571	0.8227	0.8152	0.7645
	985			5-phosphoribosyl diphosphate (PRPP)	LC/MS neg	36840	C00119	HMDB00280	7339		1.18	1.33	0.81	1.13	0.69	0.61	0.66	0.82	0.56	1.24	0.85	0.69	1.42	0.79	0.87	0.98					0.3134	0.15	0.2859	0.2925	0.6844	0.8871	0.952	0.3099	0.1604	0.077	0.1438	0.7406	0.7148	0.6877	0.9722	0.7873	0.4095	0.7458	0.7409
	986			sedoheptulose-7-phosphate	LC/MS neg	35649	C05382	HMDB01068	616		3.4	0.74	0.69	0.22	0.2	0.93	0.84	0.66	0.77	0.79	0.91	1.16	1.42	0.35	1.26	1.58					0.001	0.0022	0.2846	0.2921	0.3296	0.8454	3.628e-05	0.0001	4.9274e-05	0.0002	0.9227	0.8666	0.6534	0.6738	0.3004	0.6207	0.4452	0.7648	0.5541
	992		Pentose Metabolism	ribose	LC/MS polar	1471	C00121	HMDB00283	5779		2.65	0.55	1.2	0.21	0.45	2.17	1.14	0.72	0.71	0.63	0.62	0.99	0.98	0.42	1.28	0.58					0.0282	0.0245	0.3793	0.3357	0.8981	0.9027	0.003	0.003	0.0379	0.0245	0.3149	0.7603	0.9744	0.7479	0.6669	0.7054	0.702	0.798	0.6903
	993			ribitol	LC/MS polar	15772	C00474	HMDB00508	6912		3.49	0.35	0.69	0.1	0.2	1.98	2.1	1.2	1.2	0.57	0.57	1	0.9	0.54	3.14	1.58					0.0045	0.0062	0.0266	0.1379	0.2146	0.8337	4.3395e-06	4.6029e-05	0.0001	0.0003	0.304	0.7603	0.1252	0.4772	0.8604	0.7598	0.7329	0.8006	0.1724
	994			ribonate	LC/MS polar	27731	C01685	HMDB00867	5460677		3.52	0.86	0.94	0.24	0.27	1.09	1.29	0.95	0.74	0.74	0.58	0.78	1.1	0.4	1.21	0.87					0.0012	0.0027	0.6597	0.4378	0.7555	0.8871	0.0003	0.0005	0.0005	0.0009	0.8972	0.8611	0.6198	0.6716	0.7537	0.7358	0.2142	0.6643	0.4193
	1015			arabitol/xylitol	LC/MS polar	48885	C01904		6912		2.39	0.6	0.97	0.25	0.41	1.63	1.91	1.28	1.41	0.67	0.73	1.1	0.82	0.65	1.75	1.18					0.0076	0.0094	0.2136	0.2673	0.7999	0.8927	0.0002	0.0004	0.0038	0.0044	0.3191	0.7603	0.1239	0.4772	0.5321	0.6828	0.4044	0.7458	0.3521
	1016			ribulose/xylulose	LC/MS polar	48340			5289590		1.06	0.24	0.5	0.22	0.47	2.15	0.61	0.56	0.44	0.91	0.72	0.79	0.88	0.51	2.1	0.78					0.5078	0.211	0.0224	0.1342	0.261	0.8454	0.0041	0.004	0.078	0.0426	0.2238	0.7603	0.3525	0.6315	0.5155	0.6828	0.2524	0.7007	0.7774
	1017			arabonate/xylonate	LC/MS polar	48255					7.12	0.72	0.77	0.1	0.11	1.07	3.4	1.4	0.96	0.41	0.28	0.69	0.74	0.35	1.44	0.93					6.9442e-05	0.0004	0.5583	0.3987	0.6191	0.8871	1.0799e-05	7.7893e-05	1.4355e-05	9.1556e-05	0.9292	0.8666	0.0514	0.347	0.7811	0.7462	0.8315	0.8184	0.0917
	1018			sedoheptulose	LC/MS polar	53237		HMDB03219	5459879		8.21	0.38	0.9	0.05	0.11	2.37	1.15	0.54	0.68	0.47	0.59	1.25	1.03	0.14	1.46	0.77					0.0007	0.0017	0.2781	0.2915	0.9767	0.9106	2.3827e-05	9.7646e-05	0.0007	0.0012	0.2656	0.7603	0.9615	0.7458	0.3954	0.6652	0.6558	0.798	0.4225
	1019			ribulonate/xylulonate*	LC/MS polar	61858					29.23	0.81	0.81	0.03	0.03	1	7.2	1.09	1	0.15	0.14	0.92	1.1	0.27	1.47	1.35					6.9059e-06	0.0001	0.8104	0.4694	0.6573	0.8871	3.1798e-06	4.4105e-05	1.6385e-06	3.5255e-05	0.8382	0.8554	0.1749	0.5138	0.9907	0.7897	0.8583	0.8189	0.1714
	1022		Glycogen Metabolism	maltopentaose	LC/MS neg	35163	C06218	HMDB12254	13489094		32.1	0.11	0.29	0	0.01	2.59	0.69	0.2	0.27	0.29	0.39	1.37	1.06	0.02	1.83	0.97					0.0101	0.0116	0.0065	0.0796	0.0785	0.6384	1.874e-06	3.7546e-05	5.6326e-05	0.0002	0.2918	0.7603	0.9335	0.7402	0.3411	0.6476	0.7215	0.8003	0.3012
	1023			maltotetraose	LC/MS neg	15910	C02052	HMDB01296	446495		54.73	0.39	0.21	0.01	0	0.55	0.84	0.19	0.19	0.23	0.22	0.98	1.79	0.03	0.89	1.58					0.0003	0.001	0.1032	0.2077	0.1137	0.6884	1.4134e-06	3.2197e-05	1.6626e-06	3.5255e-05	0.9602	0.8741	0.7044	0.6877	0.0973	0.4802	0.1482	0.5937	0.1957
	1025			maltotriose	LC/MS polar	44688	C01835	HMDB01262	439586		16.28	0.35	0.48	0.02	0.03	1.38	0.67	0.15	0.34	0.22	0.5	2.21	1.7	0.07	0.75	1.2					0.0043	0.006	0.2882	0.2928	0.3602	0.8517	0.0002	0.0003	0.0003	0.0007	0.8808	0.8554	0.312	0.5963	0.0479	0.3894	0.5228	0.7737	0.3153
	1028			maltose	LC/MS polar	15586	C00208	HMDB00163	10991489		9.41	0.28	0.58	0.03	0.06	2.07	0.85	0.16	0.37	0.19	0.44	2.34	1.44	0.13	0.8	0.91					0.0264	0.0232	0.0378	0.1548	0.2702	0.8454	6.6308e-05	0.0002	0.0014	0.002	0.3092	0.7603	0.6388	0.6738	0.038	0.3673	0.5738	0.7773	0.1022
	1050		Disaccharides and Oligosaccharides	sucrose	LC/MS polar	1519	C00089	HMDB00258	5988		1.16	1.75	3.6	1.51	3.1	2.05	0.49	0.16	0.41	0.33	0.83	2.56	1.53	0.65	0.14	0.17					0.5574	0.2253	0.4458	0.362	0.0887	0.6574	0.8593	0.2885	0.2556	0.1068	0.3355	0.7603	0.4002	0.6315	0.0022	0.1386	0.2508	0.7007	0.0199
	1068		Fructose, Mannose and Galactose Metabolism	fructose	LC/MS polar	48195	C00095	HMDB00660	5984		3.76	0.32	1.12	0.08	0.3	3.53	0.74	0.47	0.66	0.64	0.9	1.42	0.8	0.16	1.18	0.47					0.0118	0.0125	0.0626	0.1714	0.9418	0.9027	4.8341e-05	0.0001	0.0098	0.0089	0.0729	0.7068	0.6028	0.6636	0.1578	0.5607	0.3599	0.7458	0.3658
	1073			mannitol/sorbitol	LC/MS polar	46142	C00794	HMDB00247	5780		4.01	0.5	0.81	0.12	0.2	1.63	2.51	1.34	1.65	0.53	0.66	1.24	1.07	0.67	2.87	2.18					0.0038	0.0057	0.0856	0.1932	0.4069	0.8649	2.0217e-05	8.8799e-05	0.0004	0.0008	0.3608	0.7603	0.053	0.347	0.4654	0.68	0.2934	0.7286	0.2161
	1074			mannose	LC/MS polar	48153	C00159	HMDB00169	18950		20.55	0.53	0.74	0.03	0.04	1.4	2.86	0.64	0.92	0.22	0.32	1.44	1.19	0.17	1.42	1.47					6.5261e-05	0.0004	0.325	0.3133	0.6524	0.8871	2.752e-06	4.1353e-05	1.5652e-05	9.1556e-05	0.5903	0.8385	0.2754	0.573	0.5558	0.6897	0.9346	0.8311	0.0969
	1075			mannose-6-phosphate	LC/MS polar	1469	C00275	HMDB01078	439198		3.21	0.61	0.32	0.19	0.1	0.52	0.6	0.46	0.45	0.76	0.75	0.99	2.31	0.43	1.74	3.29					0.0072	0.009	0.1049	0.2077	0.0637	0.6124	5.8931e-05	0.0001	2.7079e-05	0.0001	0.8055	0.8554	0.4068	0.6315	0.1829	0.5607	0.087	0.4637	0.6082
	1084			galactitol (dulcitol)	LC/MS polar	1117	C01697	HMDB00107	11850		1.12	0.58	0.91	0.52	0.81	1.56	1.32	0.89	1.07	0.67	0.81	1.2	1.2	1.41	1.83	1.41					0.438	0.1899	0.1708	0.2463	0.6142	0.8871	0.0353	0.0238	0.204	0.0906	0.3805	0.7603	0.716	0.6877	0.5676	0.6897	0.9696	0.8426	0.3515
	1085			galactose 1-phosphate	LC/MS polar	15706	C00446	HMDB00645	123912		3.19	0.51	0.45	0.16	0.14	0.89	1.19	1.24	0.88	1.04	0.74	0.71	1.02	0.38	2.48	1.99					0.0016	0.0032	0.0635	0.1714	0.14	0.7336	4.6076e-06	4.6158e-05	1.67e-05	9.443e-05	0.6891	0.8461	0.6092	0.6649	0.5069	0.6828	0.7505	0.8056	0.8781
	1094			galactonate	LC/MS polar	27719	C00880	HMDB00565	128869		1.29	0.26	0.67	0.2	0.52	2.54	0.8	1.33	1.37	1.65	1.7	1.03	0.76	0.47	3.82	1.54					0.3062	0.1481	0.0891	0.1938	0.6096	0.8871	0.0083	0.0072	0.1287	0.0642	0.2266	0.7603	0.9606	0.7458	0.5784	0.6936	0.8528	0.8189	0.6124
	1099		Nucleotide Sugar	UDP-glucose	LC/MS polar	32344	C00029	HMDB00286	8629		4.65	2.83	3.28	0.61	0.7	1.16	1.09	0.74	1.11	0.67	1.01	1.51	2.71	0.64	0.7	0.92					0.0215	0.0199	0.119	0.2199	0.1417	0.7336	0.4288	0.1797	0.3771	0.1457	0.9258	0.8666	0.4884	0.6496	0.4945	0.6828	0.9954	0.8436	0.1726
	1103			UDP-galactose	LC/MS polar	15860	C00052	HMDB00302	18068		3.79	1.66	1.6	0.44	0.42	0.97	2.3	1.56	1.26	0.68	0.55	0.81	1.6	0.97	1.51	1.26					0.0069	0.0087	0.359	0.3291	0.6194	0.8871	0.0618	0.0373	0.0238	0.0178	0.6714	0.8461	0.0533	0.347	0.3961	0.6652	0.7973	0.8134	0.2638
	1104			UDP-glucuronate	LC/MS neg	2763	C00167	HMDB00935	17473		1.71	2.6	2.22	1.52	1.29	0.85	1.23	1.56	1.18	1.27	0.96	0.76	2.22	1.6	1.33	1.18					0.2679	0.1352	0.1649	0.244	0.4804	0.8649	0.7725	0.2694	0.683	0.2256	0.4865	0.8018	0.3259	0.6095	0.4395	0.6652	0.7469	0.8056	0.8318
	1106			guanosine 5'-diphospho-fucose	LC/MS neg	15903					6.37	2.81	3.25	0.44	0.51	1.15	5.24	1.1	1.86	0.21	0.36	1.7	1.25	1.03	0.49	0.72					9.0495e-05	0.0005	0.051	0.1605	0.0276	0.4924	0.0243	0.017	0.0453	0.0279	0.7849	0.8554	0.0008	0.0862	0.7754	0.744	0.2674	0.7007	0.0019
	1110			UDP-N-acetylglucosamine/galactosamine	LC/MS polar	46148					3.61	1.22	1.49	0.34	0.41	1.22	1.86	1.21	0.87	0.65	0.47	0.72	1.76	0.91	1.75	1.03					0.0059	0.0078	0.6504	0.436	0.6498	0.8871	0.0187	0.0136	0.0187	0.015	0.9994	0.8797	0.1842	0.5149	0.7223	0.7212	0.8377	0.8189	0.3265
	1111			cytidine 5'-monophospho-N-acetylneuraminic acid	LC/MS polar	36831	C00128	HMDB01176	448209		0.85	0.75	1.09	0.88	1.28	1.46	1.35	1.15	1.02	0.85	0.76	0.89	1.19	1.89	1.83	1.12					0.9884	0.3383	0.6299	0.4281	0.7554	0.8871	0.6197	0.2304	0.7445	0.241	0.8643	0.8554	0.4961	0.6496	0.7425	0.7313	0.8772	0.8189	0.7237
	1122		Aminosugar Metabolism	glucuronate	LC/MS polar	15443	C00191	HMDB00127	444791		1.9	0.56	1.23	0.3	0.65	2.19	0.93	0.89	0.93	0.96	1	1.04	1.13	0.55	1.78	0.85					0.0909	0.0623	0.0804	0.1886	0.8403	0.8989	0.0011	0.0013	0.06	0.0345	0.1195	0.7378	0.8514	0.7184	0.9564	0.7866	0.9513	0.8362	0.8088
	1126			N-acetylglucosamine 6-phosphate	LC/MS polar	15107	C00357	HMDB02817	439219		0.81	0.5	0.74	0.62	0.91	1.48	1.01	1.15	1.28	1.14	1.27	1.11	1.04	1.3	2.4	1.8					0.8304	0.302	0.0578	0.1714	0.3714	0.8621	0.0899	0.0508	0.4952	0.1787	0.3003	0.7603	0.8734	0.7248	0.5808	0.6936	0.2732	0.7019	0.6939
	1127			N-acetyl-glucosamine 1-phosphate	LC/MS polar	15741	C04256	HMDB01367	440364		1.3	0.65	1.07	0.5	0.82	1.65	1.25	2.18	1.18	1.74	0.94	0.54	1.01	0.97	3.4	1.12					0.2149	0.1137	0.7265	0.4541	0.5063	0.8687	0.1147	0.0619	0.5588	0.1967	0.3125	0.7603	0.4486	0.6496	0.0501	0.3894	0.4896	0.7737	0.2169
	1133			N-acetylneuraminate	LC/MS polar	32377	C00270	HMDB00230	439197		1.34	0.68	1.05	0.51	0.79	1.56	1.34	0.77	1.01	0.58	0.76	1.31	1.59	1.59	1.82	1.53					0.2294	0.1207	0.3679	0.3296	0.8227	0.8989	0.0393	0.0255	0.156	0.0752	0.4971	0.8112	0.6044	0.6636	0.4394	0.6652	0.7975	0.8134	0.2
	1144			N-acetylglucosaminylasparagine	LC/MS pos early	48149	C04540	HMDB00489	123826		1.61	0.75	0.85	0.46	0.53	1.14	1.67	1.17	1.26	0.7	0.76	1.08	1.07	1.11	1.68	1.59					0.0531	0.0397	0.4574	0.3676	0.7531	0.8871	0.0091	0.0078	0.0261	0.0187	0.6669	0.8461	0.1567	0.5061	0.5857	0.6959	0.6764	0.798	0.3767
	1145			erythronate*	LC/MS polar	42420		HMDB00613	2781043		1.12	0.52	0.61	0.47	0.55	1.17	0.85	0.88	0.73	1.04	0.86	0.83	1.3	0.98	2.18	1.55					0.3323	0.156	0.039	0.1556	0.122	0.6884	0.0034	0.0033	0.0143	0.0123	0.5821	0.8385	0.7384	0.6931	0.6829	0.7066	0.3518	0.745	0.9405
	1147			N-acetylglucosamine/N-acetylgalactosamine	LC/MS pos early	46539		HMDB00215	24139		1.11	0.46	0.61	0.41	0.55	1.34	0.94	1.09	0.82	1.17	0.87	0.75	1	0.84	2.38	1.33					0.3983	0.1774	0.0897	0.1938	0.2816	0.8454	0.0132	0.0101	0.0588	0.0341	0.5209	0.8193	0.1732	0.5138	0.7226	0.7212	0.742	0.805	0.0888
	1148		Advanced Glycation End-product	N6-carboxymethyllysine	LC/MS pos early	36713			123800		1.37	1.85	1.43	1.35	1.04	0.77	1.22	0.9	0.5	0.73	0.41	0.55	1.58	1.41	0.77	0.55					0.2118	0.1127	0.1173	0.2183	0.2316	0.8454	0.7418	0.2616	0.9571	0.2925	0.7016	0.8461	0.4031	0.6315	0.7897	0.7467	0.2243	0.6744	0.2721
	1152	Energy	TCA Cycle	citrate	LC/MS neg	1564	C00158	HMDB00094	311		0.93	1.16	1.82	1.25	1.96	1.57	1.27	0.75	1.36	0.59	1.07	1.81	0.99	1.35	0.64	0.74					0.7127	0.271	0.8383	0.4785	0.0418	0.5877	0.5677	0.217	0.0177	0.0144	0.0649	0.7068	0.4871	0.6496	0.1903	0.5607	0.2619	0.7007	0.0487
	1154			aconitate [cis or trans]	LC/MS neg	46173					1.02	1.03	1.88	1.01	1.85	1.82	1.06	0.7	1.12	0.66	1.05	1.6	1.08	1.13	0.73	0.64					0.889	0.3155	0.9868	0.5249	0.0133	0.4758	0.8759	0.2918	0.0188	0.015	0.0128	0.527	0.9281	0.7402	0.0775	0.4403	0.6698	0.798	0.0643
	1158			alpha-ketoglutarate	LC/MS polar	528	C00026	HMDB00208	51		1.07	1.13	1.22	1.06	1.15	1.08	1.21	1.27	1.8	1.05	1.49	1.41	0.78	0.88	0.87	1.14					0.8628	0.3079	0.5132	0.3851	0.2617	0.8454	0.6298	0.2327	0.3405	0.1347	0.6347	0.8461	0.2125	0.5472	0.1347	0.5072	0.0007	0.0403	0.7965
	1160			succinylcarnitine (C4-DC)	LC/MS pos early	37058		HMDB61717	71464481		11.49	0.87	1.38	0.08	0.12	1.58	4.62	0.88	3.38	0.19	0.73	3.85	0.85	0.34	0.85	2.08					0.0001	0.0006	0.9096	0.5036	0.52	0.8729	0.0002	0.0003	0.0009	0.0014	0.5958	0.8385	0.2155	0.5472	0.8095	0.7543	0.3262	0.745	0.1412
	1161			succinate	LC/MS polar	1437	C00042	HMDB00254	1110		11.43	1.15	1.56	0.1	0.14	1.36	2.93	1.18	1.01	0.4	0.35	0.86	1.23	0.31	1.25	0.79					0.0005	0.0015	0.36	0.3291	0.2284	0.8454	0.0072	0.0064	0.0152	0.0128	0.7679	0.8554	0.0479	0.347	0.4785	0.6828	0.9647	0.8408	0.1924
	1162			fumarate	LC/MS polar	1643	C00122	HMDB00134	444972		1.45	0.74	0.46	0.51	0.32	0.62	1.65	0.92	0.89	0.56	0.54	0.97	0.65	0.73	0.8	1.25					0.4396	0.1901	0.6987	0.4498	0.1933	0.8271	0.2487	0.119	0.0417	0.0263	0.3562	0.7603	0.1321	0.4877	0.7511	0.7358	0.7954	0.8134	0.0707
	1163			malate	LC/MS polar	1303	C00149	HMDB00156	525		1.74	0.85	0.72	0.49	0.42	0.85	1.54	1.14	1.11	0.74	0.72	0.97	0.99	0.88	1.33	1.52					0.0197	0.0185	0.4401	0.3619	0.2105	0.8337	0.0026	0.0027	0.0006	0.0011	0.6248	0.8461	0.1307	0.4877	0.6363	0.7037	0.8212	0.8152	0.2926
	1167			itaconate	LC/MS polar	18373	C00490	HMDB02092	811		0.63	0.5	0.76	0.78	1.2	1.53	1.23	0.54	0.83	0.44	0.67	1.54	1.75	3.41	1.9	1.91					0.2901	0.1421	0.7088	0.4515	0.5457	0.8867	0.4904	0.197	0.6461	0.2183	0.8167	0.8554	0.7636	0.6975	0.0483	0.3894	0.6665	0.798	0.0906
	1173			2-methylcitrate/homocitrate	LC/MS neg	52282					4.54	0.77	1.01	0.17	0.22	1.32	2.14	1.15	0.94	0.54	0.44	0.81	1.07	0.5	1.61	0.99					6.5488e-05	0.0004	0.5025	0.3809	0.6163	0.8871	7.7186e-06	6.0513e-05	0.0003	0.0007	0.2443	0.7603	0.1738	0.5138	0.6296	0.7037	0.8827	0.8189	0.3741
	1177		Oxidative Phosphorylation	phosphate	LC/MS neg	42109	C00009	HMDB01429	1061		1.35	0.92	0.92	0.68	0.69	1.01	1.16	1.14	1.01	0.98	0.88	0.89	1.08	0.93	1.34	1.18					0.0371	0.0301	0.5633	0.3989	0.8488	0.8989	0.0092	0.0079	0.0239	0.0178	0.6979	0.8461	0.3776	0.6315	0.4447	0.6652	0.9923	0.8436	0.9047
	1179	Lipid	Fatty Acid Synthesis	malonylcarnitine	LC/MS pos early	37059		HMDB02095	22833583		3.2	1.08	0.84	0.34	0.26	0.78	1	0.9	0.68	0.9	0.68	0.75	1.02	0.32	0.86	0.83					0.0003	0.001	0.8955	0.5015	0.4832	0.8649	0.0002	0.0003	3.3838e-05	0.0001	0.5682	0.8385	0.7798	0.7023	0.5419	0.6843	0.1907	0.6487	0.7404
	1180			malonate	LC/MS polar	15872	C00383	HMDB00691	867		1.43	1.23	1.21	0.87	0.85	0.98	0.86	0.8	0.99	0.93	1.15	1.24	1.29	0.78	0.83	1.06					0.1102	0.0698	0.3767	0.3347	0.7183	0.8871	0.4639	0.191	0.2113	0.0934	0.5986	0.8385	0.5805	0.6632	0.4935	0.6828	0.9276	0.8267	0.8942
	1195		Medium Chain Fatty Acid	caproate (6:0)	LC/MS neg	32489	C01585	HMDB00535	8892		1.63	0.92	2.44	0.56	1.5	2.66	0.78	0.66	0.7	0.85	0.9	1.06	1.47	0.7	1.06	0.42					0.0658	0.0479	0.819	0.4709	0.0052	0.284	0.0401	0.0258	0.293	0.1203	0.0028	0.3444	0.4942	0.6496	0.2193	0.5696	0.3111	0.7314	0.5799
	1196			heptanoate (7:0)	LC/MS neg	1644	C17714	HMDB00666	8094		1.17	0.94	1.31	0.8	1.12	1.39	0.75	0.64	0.75	0.85	1	1.17	1.14	0.73	0.77	0.65					0.4477	0.192	0.9066	0.5036	0.3416	0.8454	0.3816	0.165	0.8458	0.2692	0.2864	0.7603	0.2431	0.5472	0.0544	0.3894	0.1758	0.6415	0.4299
	1197			caprylate (8:0)	LC/MS neg	32492	C06423	HMDB00482	379		1.57	1.13	3.94	0.72	2.52	3.47	0.73	0.48	0.52	0.66	0.72	1.09	2.64	1.22	1.11	0.35					0.3499	0.1615	0.7429	0.4566	0.0459	0.5877	0.5417	0.2101	0.2718	0.113	0.0914	0.7308	0.3844	0.6315	0.1692	0.5607	0.2147	0.6643	0.6055
	1342		Fatty Acid, Dicarboxylate	glutarate (C5-DC)	LC/MS polar	396	C00489	HMDB00661	743		3.66	0.34	1.52	0.09	0.42	4.53	2.48	0.42	0.43	0.17	0.17	1.02	0.93	0.63	1.15	0.26					0.0352	0.029	0.7063	0.4515	0.3137	0.8454	0.0144	0.011	0.253	0.1065	0.1693	0.7603	0.5354	0.659	0.3281	0.6345	0.4916	0.7737	0.1141
	1346			2-hydroxyglutarate	LC/MS pos early	52294	C02630	HMDB00606	43		0.69	0.84	0.95	1.21	1.37	1.14	0.74	0.92	0.6	1.24	0.8	0.65	1.23	1.32	1.35	0.77					0.0369	0.0301	0.2728	0.2903	0.4423	0.8649	0.3013	0.1374	0.1743	0.0821	0.7387	0.8514	0.1373	0.4901	0.6299	0.7037	0.0151	0.2222	0.3089
	1351			3-hydroxyadipate*	LC/MS polar	62069		HMDB00345	151913		8.73	0.43	0.76	0.05	0.09	1.76	0.92	0.24	0.35	0.27	0.39	1.46	1.56	0.16	0.87	0.72					0.0015	0.0031	0.1588	0.2439	0.9006	0.9027	1.9431e-05	8.7593e-05	0.001	0.0015	0.1976	0.7603	0.4043	0.6315	0.0284	0.3082	0.1081	0.4927	0.1603
	1354			maleate	LC/MS polar	20676	C01384	HMDB00176	444266		3.22	0.87	1.27	0.27	0.39	1.45	1.76	0.49	0.72	0.28	0.41	1.48	2.4	1.32	1.34	1.37					0.0033	0.005	0.9119	0.5039	0.3577	0.8497	0.0024	0.0025	0.0336	0.0226	0.3037	0.7603	0.0908	0.449	0.3662	0.659	0.8797	0.8189	0.0116
	1361			azelate (C9-DC)	LC/MS neg	18362	C08261	HMDB00784	2266		0.48	0.92	7.04	1.9	14.53	7.65	0.64	0.61	4.43	0.96	6.93	7.25	1.43	1.88	0.95	0.9					0.1682	0.0953	0.5491	0.3952	0.0354	0.583	0.4289	0.1797	0.0009	0.0014	0.0082	0.527	0.3574	0.6315	0.7161	0.7212	0.0245	0.2698	0.5754
	1363			sebacate (C10-DC)	LC/MS neg	32398	C08277	HMDB00792	5192		1.13	0.42	3.32	0.38	2.93	7.8	0.51	0.34	2.22	0.66	4.35	6.57	1.55	0.7	1.23	1.04					0.3978	0.1774	0.3311	0.3147	0.0864	0.6574	0.0734	0.0431	0.3719	0.144	0.0091	0.527	0.2459	0.5472	0.2909	0.6103	0.1161	0.5126	0.9151
	1364			undecanedioate (C11-DC)	LC/MS neg	42395		HMDB00888	15816		0.59	0.77	4.46	1.3	7.57	5.81	0.76	0.7	4.09	0.92	5.36	5.85	1.25	1.62	1.14	1.15					0.3255	0.1532	0.4315	0.3605	0.1124	0.6884	0.8419	0.2853	0.0124	0.0109	0.0203	0.5933	0.4745	0.6496	0.7354	0.7292	0.0334	0.3279	0.7046
	1367			dodecanedioate (C12-DC)	LC/MS neg	32388	C02678	HMDB00623	12736		2.87	0.59	1.45	0.21	0.51	2.45	0.92	0.78	1.55	0.85	1.68	1.99	1.11	0.36	1.46	1.19					0.043	0.0332	0.3002	0.2999	0.406	0.8649	0.0032	0.0031	0.2186	0.0956	0.0661	0.7068	0.7728	0.6975	0.7227	0.7212	0.4905	0.7737	0.9472
	1368			tetradecanedioate (C14-DC)	LC/MS neg	35669		HMDB00872	13185		8.91	1.3	1.31	0.15	0.15	1	2.2	1.13	1.48	0.52	0.67	1.3	0.81	0.2	0.71	0.92					2.5049e-06	9.6194e-05	0.5368	0.3909	0.61	0.8871	1.841e-05	8.7362e-05	1.3025e-05	8.9735e-05	0.9138	0.8655	0.1381	0.4901	0.7589	0.7367	0.3102	0.7314	0.2356
	1369			hexadecanedioate (C16-DC)	LC/MS neg	35678	C19615	HMDB00672	10459		6.08	1.03	1.27	0.17	0.21	1.23	1.95	1.03	1.31	0.53	0.67	1.27	0.83	0.27	0.84	0.86					3.0272e-05	0.0003	0.9046	0.5036	0.6418	0.8871	2.0683e-05	8.8799e-05	0.0001	0.0003	0.559	0.8385	0.0771	0.4227	0.9247	0.7741	0.3449	0.745	0.0633
	1371			hexadecenedioate (C16:1-DC)*	LC/MS neg	61862					7.34	1.62	1.36	0.22	0.18	0.84	1.55	0.82	0.67	0.52	0.43	0.82	0.92	0.19	0.46	0.45					8.1106e-05	0.0004	0.4597	0.3676	0.6868	0.8871	0.0008	0.001	0.0003	0.0006	0.7354	0.851	0.5597	0.6611	0.6379	0.7037	0.4089	0.7458	0.2945
	1421		Fatty Acid, Amino	2-aminoheptanoate	LC/MS pos early	43761			227939		1.1	1.14	1.4	1.04	1.27	1.23	0.6	1.86	0.55	3.08	0.91	0.29	2.53	1.38	4.11	0.99					0.6004	0.2382	0.7116	0.4515	0.3561	0.8497	0.8771	0.2918	0.6871	0.2263	0.5776	0.8385	0.6772	0.6741	0.0511	0.3894	0.4269	0.7522	0.0197
	1426			2-aminooctanoate	LC/MS neg	43343		HMDB00991	69522		1.17	1.34	1.16	1.15	0.99	0.86	1.32	1.94	1.49	1.47	1.13	0.77	1.13	1.28	1.64	1.46					0.6222	0.2443	0.46	0.3676	0.6497	0.8871	0.8044	0.2789	0.969	0.2951	0.7745	0.8554	0.3876	0.6315	0.0903	0.4666	0.6703	0.798	0.3937
	1437		Fatty Acid Metabolism (also BCAA Metabolism)	butyrylcarnitine (C4)	LC/MS pos early	32412	C02862	HMDB02013	439829		1.09	1.63	1.16	1.5	1.07	0.71	0.79	1.01	1.15	1.29	1.46	1.14	1.31	0.94	0.81	1.29					0.3943	0.1769	0.1672	0.246	0.6636	0.8871	0.5884	0.2202	0.6746	0.2235	0.3386	0.7603	0.8526	0.7184	0.9261	0.7741	0.5915	0.7812	0.9258
	1440			propionylcarnitine (C3)	LC/MS pos early	32452	C03017	HMDB00824	107738		6.1	1.58	1.83	0.26	0.3	1.16	2.83	1	0.97	0.36	0.34	0.96	1.56	0.72	1	0.83					0.0001	0.0006	0.2714	0.2903	0.1135	0.6884	0.003	0.003	0.0113	0.0101	0.6178	0.8455	0.1025	0.4657	0.7217	0.7212	0.8637	0.8189	0.0491
	1443			methylmalonate (MMA)	LC/MS polar	1496	C02170	HMDB00202	487		4.68	0.76	0.68	0.16	0.15	0.9	4.47	2.14	0.8	0.48	0.18	0.37	0.72	0.68	2.03	0.83					0.0016	0.0032	0.405	0.3512	0.3063	0.8454	0.0001	0.0003	7.2737e-05	0.0002	0.8467	0.8554	0.0338	0.3174	0.1055	0.4935	0.5636	0.7773	0.5909
	1452		Fatty Acid Metabolism(Acyl Glycine)	isocaproylglycine	LC/MS neg	61789					7.18	0.4	0.53	0.06	0.07	1.31	0.34	0.06	0.06	0.17	0.17	1	6.74	0.32	1	0.76					0.009	0.0106	0.5507	0.3952	0.7469	0.8871	0.0018	0.0019	0.0038	0.0044	0.7834	0.8554	0.3959	0.6315	0.0483	0.3894	0.0483	0.3697	0.2456
	1455			hexanoylglycine	LC/MS neg	35436		HMDB00701	99463		7.73	0.72	1.28	0.09	0.17	1.79	1.19	0.48	0.99	0.41	0.83	2.05	1.83	0.28	1.23	1.41					0.0003	0.001	0.3264	0.3133	0.5364	0.8817	1.4402e-05	8.1314e-05	0.0019	0.0025	0.1137	0.7378	0.81	0.7084	0.125	0.5032	0.5995	0.783	0.0779
	1459			3,4-methylene heptanoylglycine	LC/MS neg	55012					2.04	0.73	0.78	0.36	0.38	1.07	1.34	0.88	0.94	0.66	0.7	1.07	0.75	0.49	0.9	0.89					0.0288	0.0247	0.2937	0.2963	0.476	0.8649	0.0019	0.002	0.0048	0.0051	0.7322	0.851	0.2332	0.5472	0.9325	0.7757	0.8314	0.8184	0.2025
	1461			N-palmitoylglycine	LC/MS neg	42092		HMDB13034	151008		6.96	0.45	1.4	0.06	0.2	3.09	5.63	1.36	2.1	0.24	0.37	1.54	0.57	0.46	1.72	0.86					0.0002	0.0009	0.7625	0.4595	0.3993	0.8649	9.8537e-05	0.0002	0.0029	0.0036	0.2545	0.7603	0.0451	0.3401	0.4436	0.6652	0.0928	0.4637	0.2028
	1471		Fatty Acid Metabolism(Acyl Carnitine)	acetylcarnitine (C2)	LC/MS pos early	32198	C02571	HMDB00201	1		0.61	1.4	1.38	2.28	2.24	0.98	0.8	0.88	1.01	1.1	1.27	1.16	1.59	2.06	1	1.17					0.1399	0.0832	0.2206	0.2684	0.172	0.7952	0.0089	0.0077	0.0061	0.0062	0.8844	0.8554	0.417	0.6315	0.6551	0.7054	0.9844	0.8436	0.7132
	1473			3-hydroxybutyrylcarnitine (1)	LC/MS pos early	43264		HMDB13127	53481617		5.02	1.17	0.66	0.23	0.13	0.57	1.14	1.43	1.34	1.26	1.18	0.93	2.17	0.49	2.66	4.39					0.0004	0.0012	0.8595	0.4877	0.4796	0.8649	0.0007	0.0009	4.6413e-05	0.0002	0.3778	0.7603	0.6448	0.6738	0.8785	0.7665	0.5063	0.7737	0.7576
	1474			3-hydroxybutyrylcarnitine (2)	LC/MS pos early	52984		HMDB13127			0.92	1.06	0.72	1.15	0.78	0.68	0.92	0.85	0.96	0.92	1.05	1.13	1.11	1.1	0.89	1.48					0.9353	0.3265	0.843	0.4794	0.29	0.8454	0.9069	0.2995	0.2553	0.1068	0.2108	0.7603	0.8041	0.7084	0.5434	0.6843	0.8991	0.8237	0.7184
	1476			hexanoylcarnitine (C6)	LC/MS pos early	32328		HMDB00705	6426853		1.5	1.12	1.09	0.75	0.73	0.98	0.62	0.85	0.79	1.35	1.27	0.93	1.28	0.54	0.97	0.93					0.1498	0.0872	0.9944	0.525	0.5804	0.8871	0.1518	0.0791	0.3677	0.143	0.5852	0.8385	0.5342	0.659	0.5651	0.6897	0.7977	0.8134	0.9627
	1477			3-hydroxyhexanoylcarnitine (2)	LC/MS pos early	62556					1.31	0.59	0.56	0.45	0.43	0.95	1.23	0.9	0.84	0.73	0.69	0.93	1.11	1.04	1.7	1.66					0.3853	0.1741	0.0873	0.1938	0.0458	0.5877	0.012	0.0095	0.0054	0.0057	0.7593	0.8554	0.3228	0.6087	0.7241	0.7212	0.8212	0.8152	0.1825
	1478			3-hydroxyhexanoylcarnitine (1)	LC/MS pos early	62557					0.85	0.62	0.65	0.74	0.77	1.05	0.97	1.03	0.84	1.06	0.87	0.82	1.03	1.18	1.7	1.32					0.4811	0.2044	0.0329	0.1516	0.0228	0.4915	0.1419	0.0742	0.1053	0.0548	0.8744	0.8554	0.8592	0.7201	0.7918	0.7467	0.5228	0.7737	0.6592
	1479			octanoylcarnitine (C8)	LC/MS pos late	33936	C02838	HMDB00791	123701		1.34	0.83	1.15	0.62	0.86	1.38	0.46	0.69	0.53	1.5	1.16	0.77	1.57	0.54	1.31	0.73					0.2318	0.1216	0.4286	0.3605	0.5462	0.8867	0.0508	0.0318	0.5483	0.1938	0.1667	0.7603	0.3557	0.6315	0.6919	0.7131	0.4805	0.7737	0.5955
	1481			decanoylcarnitine (C10)	LC/MS pos late	33941		HMDB00651	10245190		1.14	0.91	1.65	0.79	1.44	1.81	0.46	0.58	0.44	1.25	0.95	0.76	2.06	0.84	1.31	0.55					0.4065	0.1794	0.7015	0.4498	0.1536	0.7532	0.2278	0.1104	0.5415	0.1922	0.0731	0.7068	0.3863	0.6315	0.5349	0.6828	0.4099	0.7458	0.8039
	1484			cis-4-decenoylcarnitine (C10:1)	LC/MS pos late	38178					1.99	1.04	1.23	0.52	0.62	1.19	0.59	1.11	0.8	1.89	1.37	0.72	1.18	0.35	1.27	0.77					0.1026	0.0675	0.7803	0.4595	0.5638	0.8871	0.058	0.0354	0.2829	0.1168	0.3933	0.7603	0.9148	0.7374	0.3463	0.6484	0.3839	0.7458	0.2952
	1485			laurylcarnitine (C12)	LC/MS pos late	34534		HMDB02250	10427569		0.52	0.62	1.13	1.2	2.18	1.82	0.44	0.58	0.32	1.33	0.73	0.55	1.54	1.31	1.44	0.43					0.1878	0.103	0.1789	0.2515	0.4829	0.8649	0.9777	0.3167	0.0471	0.0288	0.0443	0.7068	0.1316	0.4877	0.2655	0.5994	0.0379	0.3344	0.684
	1486			myristoylcarnitine (C14)	LC/MS pos late	33952		HMDB05066	6426854		0.55	0.64	1.34	1.17	2.44	2.08	0.45	0.56	0.34	1.23	0.76	0.62	1.58	1.3	1.36	0.4					0.1211	0.0745	0.2528	0.2813	0.4965	0.8649	0.6742	0.2445	0.0287	0.0203	0.0722	0.7068	0.1005	0.4657	0.2469	0.5916	0.0426	0.3578	0.6156
	1488			palmitoylcarnitine (C16)	LC/MS pos late	44681	C02990	HMDB00222	461		0.52	0.52	1.16	1	2.21	2.21	0.55	0.61	0.51	1.11	0.93	0.84	1.47	1.54	1.7	0.65					0.0573	0.0423	0.2002	0.2609	0.8408	0.8989	0.5162	0.2041	0.0369	0.0242	0.1403	0.7378	0.2382	0.5472	0.3666	0.659	0.211	0.6643	0.7778
	1489			palmitoleoylcarnitine (C16:1)*	LC/MS pos late	53223			71464547		0.64	0.8	1.22	1.25	1.91	1.52	0.32	0.46	0.24	1.43	0.75	0.52	2	0.99	1.13	0.39					0.5308	0.2183	0.4777	0.3726	0.472	0.8649	0.9331	0.3059	0.182	0.0845	0.1568	0.7603	0.0211	0.2502	0.127	0.5032	0.0064	0.1179	0.4042
	1490			stearoylcarnitine (C18)	LC/MS pos late	34409		HMDB00848	6426855		0.58	0.57	0.75	0.98	1.3	1.32	0.67	0.81	0.69	1.22	1.04	0.85	1.55	1.77	2.2	1.42					0.2486	0.129	0.2678	0.2903	0.4635	0.8649	0.9628	0.3128	0.669	0.223	0.7032	0.8461	0.3801	0.6315	0.7235	0.7212	0.4063	0.7458	0.5983
	1491			linoleoylcarnitine (C18:2)*	LC/MS pos late	46223		HMDB06469	6450015		0.87	0.94	1.01	1.08	1.16	1.07	0.43	0.47	0.27	1.09	0.62	0.57	2.42	1.22	1.23	0.65					0.8511	0.3059	0.4818	0.3738	0.9595	0.9053	0.374	0.1625	0.891	0.2793	0.451	0.777	0.2654	0.5663	0.2526	0.5953	0.0243	0.2698	0.9751
	1492			linolenoylcarnitine (C18:3)*	LC/MS pos late	57511					0.56	1.34	1.08	2.4	1.95	0.81	0.23	0.66	0.19	2.9	0.83	0.29	1.72	0.7	0.85	0.3					0.5629	0.2271	0.9053	0.5036	0.8865	0.9027	0.6454	0.2363	0.4714	0.172	0.7936	0.8554	0.1605	0.5099	0.7593	0.7367	0.0986	0.4685	0.2687
	1493			3-hydroxyoleoylcarnitine	LC/MS pos late	61840					0.7	0.41	0.64	0.59	0.91	1.55	0.97	0.78	0.72	0.8	0.74	0.93	1.1	1.52	2.07	1.25					0.8596	0.3074	0.0593	0.1714	0.4516	0.8649	0.0854	0.0491	0.5637	0.1974	0.2444	0.7603	0.7578	0.6975	0.388	0.6652	0.2686	0.7007	0.577
	1494			oleoylcarnitine (C18:1)	LC/MS pos late	35160		HMDB05065	6441392		0.64	0.68	1.09	1.06	1.69	1.6	0.46	0.47	0.37	1.02	0.8	0.79	1.97	1.42	1.37	0.67					0.3955	0.177	0.2985	0.2991	0.9031	0.9027	0.8468	0.2859	0.3323	0.1326	0.2466	0.7603	0.1113	0.4657	0.1197	0.5032	0.0533	0.3982	0.9695
	1496			myristoleoylcarnitine (C14:1)*	LC/MS pos late	48182			90659872		0.48	0.86	1.3	1.79	2.68	1.5	0.28	0.54	0.24	1.97	0.85	0.43	2.35	1.34	1.48	0.43					0.2798	0.1388	0.7104	0.4515	0.262	0.8454	0.4747	0.1932	0.0312	0.0212	0.1385	0.7378	0.0205	0.2502	0.1681	0.5607	0.0155	0.2222	0.3187
	1507			arachidoylcarnitine (C20)*	LC/MS pos late	57513		HMDB06460			1.11	0.73	0.61	0.65	0.55	0.84	0.67	0.67	0.59	0.99	0.87	0.88	1.96	1.19	1.79	1.89					0.4289	0.1869	0.6183	0.4237	0.3045	0.8454	0.2006	0.0991	0.0733	0.0404	0.5935	0.8385	0.6742	0.6741	0.6492	0.7051	0.3428	0.745	0.9724
	1508			arachidonoylcarnitine (C20:4)	LC/MS pos late	57518					1.41	0.67	0.56	0.48	0.4	0.83	1.52	1.75	0.84	1.15	0.55	0.48	0.6	0.65	1.55	0.9					0.198	0.1065	0.1848	0.2518	0.2257	0.8454	0.0112	0.0091	0.0151	0.0128	0.906	0.8643	0.2984	0.5874	0.1823	0.5607	0.8177	0.8152	0.7629
	1509			adrenoylcarnitine (C22:4)*	LC/MS pos late	57528					0.45	0.88	0.62	1.96	1.37	0.7	1.02	1.46	0.89	1.43	0.87	0.61	0.78	1.76	1.29	1.12					0.2332	0.122	0.5715	0.4023	0.2914	0.8454	0.5259	0.2061	0.8884	0.2791	0.6208	0.8455	0.9413	0.7443	0.4897	0.6828	0.9442	0.8336	0.5368
	1510			behenoylcarnitine (C22)*	LC/MS pos late	57514					0.77	0.5	0.7	0.65	0.91	1.39	0.45	0.34	0.42	0.76	0.93	1.22	2.51	1.45	1.69	1.49					0.4951	0.2076	0.1806	0.2515	0.5305	0.8784	0.504	0.2006	0.9558	0.2925	0.4696	0.7897	0.5792	0.6632	0.2143	0.5696	0.3928	0.7458	0.4863
	1512			dihomo-linolenoylcarnitine (C20:3n3 or 6)*	LC/MS pos late	57521					0.79	0.92	0.91	1.16	1.16	0.99	0.75	0.89	0.66	1.19	0.88	0.74	1.04	0.99	1.01	0.75					0.8708	0.3096	0.4804	0.3738	0.5073	0.8687	0.3862	0.1662	0.4099	0.1549	0.9657	0.8744	0.7669	0.6975	0.8205	0.7571	0.4688	0.7737	0.9445
	1513			dihomo-linoleoylcarnitine (C20:2)*	LC/MS pos late	57520					0.53	0.71	0.79	1.32	1.48	1.12	0.47	0.46	0.54	0.99	1.14	1.15	2.14	1.88	1.4	1.44					0.3637	0.1663	0.7473	0.4568	0.7001	0.8871	0.5556	0.2141	0.5984	0.2069	0.9497	0.8683	0.2181	0.5472	0.2575	0.5958	0.4004	0.7458	0.9188
	1514			eicosenoylcarnitine (C20:1)*	LC/MS pos late	57519					0.92	0.78	0.75	0.84	0.81	0.96	0.67	0.59	0.67	0.89	1.01	1.14	1.66	1.2	1.27	1.5					0.7915	0.2917	0.776	0.4595	0.6083	0.8871	0.5836	0.2202	0.4384	0.1631	0.8191	0.8554	0.3961	0.6315	0.2877	0.6103	0.4381	0.7558	0.8273
	1515			erucoylcarnitine (C22:1)*	LC/MS pos late	57525					1.83	0.61	0.55	0.33	0.3	0.91	0.76	0.69	0.57	0.9	0.75	0.84	1.65	0.68	1.85	1.7					0.0285	0.0245	0.7184	0.4529	0.3352	0.8454	0.0119	0.0094	0.0024	0.003	0.5438	0.8324	0.964	0.7458	0.6758	0.7055	0.4278	0.7522	0.709
	1516			docosadienoylcarnitine (C22:2)*	LC/MS pos late	57526					0.98	0.61	0.6	0.62	0.61	0.98	0.87	0.91	0.98	1.04	1.12	1.08	1.26	1.12	1.89	2.07					0.378	0.1712	0.8375	0.4785	0.4537	0.8649	0.2788	0.1299	0.1072	0.0553	0.5853	0.8385	0.769	0.6975	0.805	0.7543	0.8958	0.8237	0.9626
	1517			docosatrienoylcarnitine (C22:3)*	LC/MS pos late	57527					0.64	0.68	0.72	1.05	1.11	1.06	0.82	1.12	0.84	1.36	1.02	0.75	0.98	1.25	1.62	1.14					0.2648	0.1345	0.6466	0.4344	0.4259	0.8649	0.5074	0.2015	0.7458	0.241	0.7338	0.851	0.6474	0.6738	0.8912	0.7732	0.5556	0.7773	0.5529
	1518			docosapentaenoylcarnitine (C22:5n3)*	LC/MS pos late	57529					0.68	0.7	0.88	1.03	1.29	1.25	0.71	1.18	0.69	1.66	0.97	0.59	0.9	0.94	1.52	0.71					0.8204	0.3	0.2232	0.2693	0.458	0.8649	0.3192	0.1443	0.6053	0.2079	0.6283	0.8461	0.6939	0.6832	0.6348	0.7037	0.6033	0.7837	0.3868
	1519			docosahexaenoylcarnitine (C22:6)*	LC/MS pos late	57523					2.84	1.28	0.74	0.45	0.26	0.58	3.29	1.76	0.85	0.53	0.26	0.48	0.59	0.68	0.81	0.67					0.0194	0.0183	0.3386	0.3178	0.4353	0.8649	0.0015	0.0017	0.0025	0.0032	0.8577	0.8554	0.0435	0.3362	0.1675	0.5607	0.8645	0.8189	0.5006
	1521			lignoceroylcarnitine (C24)*	LC/MS pos late	57515					0.41	0.41	0.92	1.01	2.25	2.23	0.78	0.63	0.78	0.8	1	1.25	1.46	2.78	2.2	1.24					0.0181	0.0173	0.1501	0.2439	0.8787	0.9027	0.3241	0.1457	0.026	0.0187	0.1965	0.7603	0.6768	0.6741	0.6304	0.7037	0.9703	0.8426	0.9486
	1522			margaroylcarnitine (C17)*	LC/MS pos late	57512		HMDB06210			0.88	0.5	1.45	0.57	1.65	2.88	0.71	0.63	0.61	0.88	0.85	0.97	1.68	1.36	2.08	0.7					0.9167	0.323	0.0943	0.1962	0.7341	0.8871	0.0764	0.0443	0.814	0.2615	0.0463	0.7068	0.5534	0.6611	0.3153	0.628	0.2704	0.7007	0.6772
	1523			nervonoylcarnitine (C24:1)*	LC/MS pos late	57531					0.8	0.44	0.99	0.55	1.24	2.25	0.89	0.67	0.8	0.76	0.9	1.2	1.31	1.45	1.99	1.06					0.2772	0.1379	0.1525	0.2439	0.7128	0.8871	0.7231	0.2562	0.4691	0.172	0.2832	0.7603	0.9209	0.7395	0.4324	0.6652	0.9361	0.8311	0.4922
	1526			pentadecanoylcarnitine (C15)*	LC/MS pos late	57522					0.38	0.52	5.23	1.38	13.8	10.03	0.44	0.51	0.47	1.15	1.05	0.92	1.55	1.81	1.51	0.14					0.0111	0.0123	0.2143	0.2673	0.3069	0.8454	0.1694	0.087	0.0007	0.0011	0.0269	0.6606	0.1487	0.5026	0.324	0.6313	0.3035	0.7314	0.6382
	1527			docosapentaenoylcarnitine (C22:5n6)*	LC/MS pos late	57530					1.02	0.78	0.5	0.77	0.49	0.64	1.73	1.87	0.92	1.08	0.53	0.49	0.52	0.88	1.24	0.97					0.5798	0.2329	0.1617	0.2439	0.118	0.6884	0.0542	0.0336	0.0372	0.0243	0.8643	0.8554	0.237	0.5472	0.1657	0.5607	0.8803	0.8189	0.8335
	1529			3-hydroxypalmitoylcarnitine	LC/MS pos late	61839					0.58	0.37	0.61	0.63	1.05	1.65	1	0.94	0.79	0.94	0.79	0.85	0.94	1.61	2.39	1.22					0.1911	0.1045	0.0263	0.1379	0.2224	0.8443	0.3345	0.1497	0.9284	0.2879	0.2922	0.7603	0.948	0.7457	0.9173	0.7741	0.3718	0.7458	0.9692
	1531		Carnitine Metabolism	deoxycarnitine	LC/MS pos early	36747	C01181	HMDB01161	134		1.78	0.82	1.07	0.46	0.6	1.31	2.03	0.89	0.86	0.44	0.43	0.97	1.21	1.38	1.33	0.98					0.0204	0.019	0.5889	0.4077	0.875	0.9027	0.0052	0.0048	0.0296	0.0205	0.4861	0.8018	0.1569	0.5061	0.6599	0.7054	0.5186	0.7737	0.0666
	1532			carnitine	LC/MS pos early	15500	C00318	HMDB00062	10917		2.51	1.13	0.91	0.45	0.36	0.81	1.14	0.99	0.9	0.87	0.79	0.91	1.19	0.54	1.05	1.18					0.0001	0.0005	0.5803	0.4075	0.611	0.8871	0.0006	0.0008	2.0836e-05	9.8181e-05	0.291	0.7603	0.5681	0.6611	0.9499	0.7841	0.5793	0.7781	0.5266
	1537		Ketone Bodies	3-hydroxybutyrate (BHBA)	LC/MS polar	542	C01089	HMDB00357	441		5.29	1.47	0.97	0.28	0.18	0.66	1.29	0.81	1.77	0.63	1.37	2.18	2.4	0.59	1.32	4.37					0.0023	0.004	0.5304	0.3891	0.559	0.8871	0.0124	0.0096	0.0111	0.01	0.9654	0.8744	0.732	0.6905	0.2477	0.5916	0.1759	0.6415	0.1369
	1540		Fatty Acid Metabolism (Acyl Choline)	palmitoylcholine	LC/MS pos late	52944			151731		2.99	0.48	1.61	0.16	0.54	3.37	1.14	1.15	0.9	1.01	0.79	0.79	1.25	0.48	3.02	0.7					0.0079	0.0096	0.0636	0.1714	0.5965	0.8871	3.0409e-05	0.0001	0.0293	0.0205	0.0192	0.5933	0.353	0.6315	0.2921	0.6103	0.7514	0.8056	0.8988
	1541			oleoylcholine	LC/MS pos late	53260					6.64	0.24	2.03	0.04	0.31	8.61	2.29	0.79	2.23	0.34	0.97	2.82	0.72	0.25	2.41	0.79					0.0002	0.0007	0.1943	0.2576	0.2805	0.8454	2.5124e-06	4.1185e-05	0.0038	0.0044	0.0204	0.5933	0.1605	0.5099	0.9194	0.7741	0.5467	0.7773	0.1335
	1542			palmitoloelycholine	LC/MS pos late	53257					3.74	0.22	1.6	0.06	0.43	7.4	1.34	0.87	1.62	0.65	1.21	1.87	0.63	0.22	2.53	0.64					0.001	0.0023	0.1789	0.2515	0.602	0.8871	1.5519e-05	8.4801e-05	0.0044	0.0048	0.0655	0.7068	0.4814	0.6496	0.9625	0.7873	0.6588	0.798	0.511
	1544			linoleoylcholine*	LC/MS pos late	57463					3.48	0.17	2.05	0.05	0.59	11.77	4.92	1.06	3.52	0.22	0.71	3.31	0.44	0.62	2.69	0.76					0.0029	0.0046	0.2343	0.2756	0.4739	0.8649	8.3782e-05	0.0002	0.0189	0.015	0.0606	0.7068	0.0865	0.4413	0.9186	0.7741	0.4036	0.7458	0.1059
	1546			stearoylcholine*	LC/MS pos late	57464					11.98	0.85	2.18	0.07	0.18	2.55	1.37	0.44	0.7	0.32	0.52	1.61	3.16	0.36	1.62	1.02					3.1577e-05	0.0003	0.7762	0.4595	0.4091	0.8649	1.2754e-05	7.9218e-05	0.0004	0.0008	0.2692	0.7603	0.3261	0.6095	0.7607	0.7367	0.9181	0.8252	0.2007
	1548			arachidonoylcholine	LC/MS pos late	53261					1.92	0.55	2.33	0.29	1.21	4.23	2.78	1.39	2.34	0.5	0.84	1.68	0.68	0.99	1.73	0.69					0.2644	0.1345	0.4173	0.3546	0.3358	0.8454	0.058	0.0354	0.8755	0.2765	0.0804	0.7205	0.138	0.4901	0.54	0.6843	0.173	0.6415	0.376
	1555		Fatty Acid, Monohydroxy	2-hydroxyheptanoate*	LC/MS polar	61827			2750949		0.82	0.74	3.1	0.9	3.76	4.19	1.05	0.5	1.56	0.48	1.49	3.1	1.93	2.45	1.31	0.97					0.7233	0.2734	0.564	0.3989	0.0526	0.5877	0.823	0.282	0.0235	0.0177	0.0137	0.527	0.9658	0.7459	0.437	0.6652	0.6199	0.7901	0.4124
	1557			2-hydroxydecanoate	LC/MS neg	42489			21488		0.83	0.7	1.38	0.84	1.65	1.96	0.68	0.55	0.7	0.8	1.02	1.27	2.1	1.72	1.64	1.06					0.6101	0.2411	0.3407	0.3187	0.3768	0.8649	0.6549	0.239	0.1669	0.0795	0.0705	0.7068	0.2806	0.5738	0.3202	0.6293	0.5481	0.7773	0.931
	1560			2-hydroxypalmitate	LC/MS neg	35675		HMDB31057	92836		0.73	0.51	2.17	0.71	2.98	4.21	0.68	0.96	1.32	1.42	1.95	1.37	0.97	0.9	1.82	0.59					0.2678	0.1352	0.5198	0.3851	0.3273	0.8454	0.6379	0.2348	0.0407	0.0258	0.1086	0.7342	0.4068	0.6315	0.9972	0.7901	0.4045	0.7458	0.4049
	1562			2-hydroxystearate	LC/MS neg	17945	C03045		69417		1.19	0.71	1.42	0.59	1.19	2.01	0.75	1.38	1.71	1.83	2.26	1.24	1.09	0.69	2.12	1.31					0.9743	0.3346	0.9848	0.5249	0.5825	0.8871	0.9895	0.3193	0.6047	0.2079	0.5956	0.8385	0.3456	0.6297	0.5757	0.6931	0.2133	0.6643	0.1367
	1569			3-hydroxyhexanoate	LC/MS neg	53230			151492		1.1	0.7	0.87	0.64	0.79	1.24	1.1	1.29	0.61	1.18	0.55	0.47	1.25	1.25	2.3	0.88					0.5167	0.2143	0.18	0.2515	0.3175	0.8454	0.0503	0.0316	0.1035	0.0542	0.7264	0.851	0.3988	0.6315	0.1886	0.5607	0.0909	0.4637	0.6306
	1570			3-hydroxyoctanoate	LC/MS neg	22001		HMDB01954	26613		0.57	0.48	0.63	0.84	1.1	1.31	1.03	1.33	0.89	1.29	0.87	0.67	1.24	2.24	3.45	1.77					0.1151	0.0721	0.051	0.1605	0.2234	0.8443	0.6907	0.2481	0.7103	0.2331	0.4429	0.7742	0.5498	0.6611	0.4015	0.6652	0.6648	0.798	0.1545
	1572			3-hydroxydecanoate	LC/MS neg	22053		HMDB02203	26612		0.62	0.4	0.52	0.65	0.84	1.3	1.15	1.65	0.84	1.44	0.73	0.51	0.89	1.66	3.7	1.46					0.161	0.0926	0.0049	0.0736	0.0639	0.6124	0.1284	0.0683	0.6354	0.216	0.289	0.7603	0.7128	0.6877	0.0787	0.4403	0.4102	0.7458	0.1594
	1574			3-hydroxylaurate	LC/MS neg	32457		HMDB00387	94216		0.57	0.35	0.4	0.6	0.7	1.16	1.12	1.68	0.63	1.5	0.56	0.38	0.81	1.59	3.94	1.27					0.103	0.0675	0.0011	0.0429	0.0097	0.4193	0.0706	0.0418	0.3014	0.1235	0.4224	0.7603	0.6412	0.6738	0.0526	0.3894	0.076	0.4553	0.1344
	1577			3-hydroxypalmitate	LC/MS neg	27503		HMDB10734	301590		1.25	0.7	1.01	0.57	0.81	1.43	0.89	0.86	0.68	0.96	0.76	0.8	1.04	0.74	1.26	0.7					0.7201	0.2727	0.2908	0.2945	0.763	0.8871	0.4821	0.194	0.9546	0.2925	0.4477	0.7742	0.953	0.7458	0.9239	0.7741	0.6256	0.7912	0.9708
	1587			8-hydroxyoctanoate	LC/MS neg	21239		HMDB61914	69820		0.91	0.97	5.88	1.07	6.47	6.05	1.13	0.54	1.71	0.48	1.52	3.17	3.5	4.33	1.94	1.02					0.927	0.3248	0.9833	0.5249	0.0217	0.4915	0.9104	0.3001	0.0174	0.0142	0.0228	0.5933	0.561	0.6611	0.4056	0.6652	0.5077	0.7737	0.8005
	1589			16-hydroxypalmitate	LC/MS neg	39609	C18218	HMDB06294	10466		0.83	0.72	1.39	0.87	1.67	1.93	1.02	0.6	0.63	0.59	0.62	1.06	1.16	1.42	0.96	0.53					0.5067	0.211	0.3345	0.3149	0.4806	0.8649	0.7605	0.2663	0.1746	0.0821	0.099	0.7342	0.395	0.6315	0.2053	0.5696	0.2243	0.6744	0.6713
	1593			13-HODE + 9-HODE	LC/MS neg	37752			43013		0.97	0.5	1.07	0.51	1.11	2.17	0.62	0.31	0.36	0.5	0.59	1.18	2.86	1.82	1.76	0.96					0.3102	0.1493	0.2406	0.2756	0.7137	0.8871	0.871	0.2914	0.17	0.0806	0.1264	0.7378	0.5557	0.6611	0.2338	0.5801	0.2653	0.7007	0.5422
	1596			14-HDoHE/17-HDoHE	LC/MS neg	53034					1.84	0.5	0.71	0.27	0.39	1.42	0.62	0.36	0.67	0.58	1.08	1.87	1.83	0.62	1.32	1.74					0.3153	0.1505	0.3187	0.3133	0.6467	0.8871	0.9943	0.3196	0.5819	0.2027	0.5868	0.8385	0.4205	0.6344	0.1561	0.5591	0.7861	0.8134	0.5312
	1608			3-hydroxystearate	LC/MS neg	52938			5282907		1.47	2.39	1.07	1.62	0.73	0.45	1.11	1.16	1.14	1.04	1.02	0.98	0.49	0.37	0.24	0.51					0.8412	0.3047	0.6634	0.4383	0.1637	0.7757	0.5257	0.2061	0.2306	0.0986	0.0706	0.7068	0.4153	0.6315	0.9727	0.7873	0.8921	0.8231	0.4349
	1615		Fatty Acid, Dihydroxy	9,10-DiHOME	LC/MS neg	38399	C14828	HMDB04704	9966640		1.85	0.61	1.53	0.33	0.83	2.51	2.47	1.42	0.91	0.58	0.37	0.64	0.5	0.67	1.16	0.29					0.0924	0.0629	0.1615	0.2439	0.9021	0.9027	0.0031	0.0031	0.1174	0.0596	0.1289	0.7378	0.2228	0.5472	0.3709	0.659	0.8904	0.8231	0.7406
	1640		Eicosanoid	prostaglandin E2	LC/MS neg	7746	C00584	HMDB01220	5280360		0.12	0.08	0.42	0.69	3.53	5.08	0.4	1.24	0.51	3.09	1.27	0.41	0.53	1.8	8	0.65					0.0005	0.0014	0.004	0.0734	0.3916	0.8649	0.4763	0.1934	0.0059	0.0061	0.0343	0.6787	0.0312	0.3067	0.6713	0.7054	0.2085	0.6633	0.0785
	1646			prostaglandin D2	LC/MS neg	7737	C00696	HMDB01403	448457		0.21	0.36	0.44	1.68	2.07	1.24	1.18	2.11	1.15	1.78	0.98	0.55	0.55	3.06	3.26	1.44					0.2639	0.1345	0.7393	0.4558	0.6662	0.8871	0.4295	0.1797	0.4888	0.1768	0.9213	0.8666	0.9123	0.7368	0.2293	0.5781	0.6917	0.798	0.2736
	1652			prostaglandin F2alpha	LC/MS neg	19398	C00639	HMDB01139	5280363		0.28	0.67	0.65	2.42	2.37	0.98	1.26	0.92	1.57	0.73	1.25	1.7	0.95	4.36	1.32	2.29					0.0135	0.014	0.2477	0.2795	0.347	0.8455	0.1661	0.0856	0.1105	0.0566	0.8258	0.8554	0.807	0.7084	0.2362	0.5829	0.5363	0.7749	0.1553
	1656			6-keto prostaglandin F1alpha	LC/MS pos late	20476	C05961	HMDB02886	5280888		0.49	0.3	0.65	0.61	1.32	2.17	0.67	1.51	1.07	2.24	1.59	0.71	0.88	1.2	4.44	1.45					0.003	0.0047	0.0591	0.1714	0.5326	0.8784	0.2284	0.1104	0.0152	0.0128	0.1966	0.7603	0.5366	0.659	0.2547	0.5954	0.7546	0.8056	0.0828
	1695			12-HETE	LC/MS neg	37536		HMDB06111	5312983		1.61	0.56	0.56	0.35	0.35	1	0.59	0.51	0.72	0.86	1.22	1.42	1.68	0.61	1.51	2.14					0.14	0.0832	0.3591	0.3291	0.4407	0.8649	0.5666	0.217	0.4715	0.172	0.8823	0.8554	0.3737	0.6315	0.5093	0.6828	0.808	0.8152	0.8165
	1697			15-HETE	LC/MS neg	37538	C04742	HMDB02110	5280724		0.93	0.44	0.56	0.48	0.61	1.28	0.76	0.55	0.89	0.73	1.17	1.6	1.14	0.93	1.43	1.79					0.0239	0.0214	0.1422	0.2388	0.4034	0.8649	0.4003	0.1713	0.1407	0.0686	0.5177	0.8193	0.566	0.6611	0.494	0.6828	0.876	0.8189	0.9117
	1701			12-HHTrE	LC/MS neg	57393	C20388	HMDB12535	5283141		0.56	0.33	0.59	0.59	1.06	1.79	0.7	1.53	0.62	2.17	0.88	0.4	1.15	1.46	5.38	1.21					0.0227	0.0206	0.0146	0.1078	0.268	0.8454	0.856	0.288	0.2195	0.0957	0.1605	0.7603	0.4268	0.6416	0.4398	0.6652	0.204	0.6623	0.1212
	1708		Endocannabinoid	oleoyl ethanolamide	LC/MS pos late	38102		HMDB02088	5283454		0.36	0.46	0.48	1.28	1.36	1.06	0.39	0.5	0.44	1.28	1.14	0.89	0.88	0.96	0.96	0.8					0.0019	0.0035	0.0349	0.1516	0.0208	0.4915	0.2585	0.122	0.3612	0.1415	0.825	0.8554	0.0237	0.2502	0.1184	0.5032	0.0438	0.3584	0.4539
	1711			palmitoyl ethanolamide	LC/MS pos late	38165	C16512	HMDB02100	4671		0.36	0.13	0.64	0.37	1.76	4.81	0.22	0.15	0.14	0.67	0.61	0.91	1.66	1.03	1.89	0.36					0.1204	0.0745	0.0006	0.0276	0.2594	0.8454	0.0366	0.0243	0.6602	0.2222	0.0128	0.527	0.0378	0.3265	0.0067	0.2138	0.0049	0.1037	0.4804
	1712			stearoyl ethanolamide	LC/MS pos late	38625		HMDB13078	27902		0.32	0.1	0.7	0.31	2.14	6.89	0.17	0.12	0.12	0.71	0.74	1.05	1.92	0.99	2.25	0.34					0.1813	0.1	0.0012	0.0429	0.4102	0.8649	0.0386	0.0252	0.6002	0.2069	0.011	0.527	0.0438	0.3362	0.0129	0.2763	0.0138	0.218	0.6056
	1713			docosahexaenoyl ethanolamide	LC/MS pos late	43768			5283451		0.49	0.47	0.49	0.96	0.99	1.03	1.53	1.66	1.8	1.09	1.18	1.08	0.62	1.92	2.18	2.29					0.2148	0.1137	0.3243	0.3133	0.275	0.8454	0.7943	0.2765	0.8787	0.2766	0.9138	0.8655	0.5639	0.6611	0.4638	0.68	0.3512	0.745	0.8754
	1719			N-arachidonoyltaurine	LC/MS neg	54748					9.58	0.51	1.41	0.05	0.15	2.75	14.28	1.46	4.97	0.1	0.35	3.39	0.36	0.54	1.04	1.28					4.5138e-05	0.0003	0.7547	0.458	0.5819	0.8871	1.6736e-05	8.6226e-05	0.0002	0.0006	0.3896	0.7603	0.0328	0.315	0.5677	0.6897	0.0478	0.3697	0.1099
	1720			N-oleoyltaurine	LC/MS neg	39732			6437033		6.13	0.67	0.78	0.11	0.13	1.16	1.27	0.44	0.71	0.35	0.56	1.62	1.43	0.3	0.94	1.31					0.0002	0.0007	0.7793	0.4595	0.7703	0.8871	0.0004	0.0005	0.0004	0.0008	0.9906	0.8797	0.8108	0.7084	0.2824	0.6103	0.8236	0.8152	0.1908
	1721			N-stearoyltaurine	LC/MS neg	39730			168274		0.87	0.4	0.46	0.46	0.52	1.13	1.01	1	1.41	0.99	1.4	1.41	0.7	0.81	1.73	2.17					0.4234	0.1852	0.8744	0.4924	0.6886	0.8871	0.3389	0.1512	0.2324	0.0991	0.8081	0.8554	0.786	0.705	0.8621	0.7598	0.4988	0.7737	0.922
	1722			N-palmitoyltaurine	LC/MS neg	39835					2.8	0.8	0.88	0.29	0.31	1.09	1.11	0.62	0.82	0.56	0.74	1.33	1.15	0.46	0.89	1.08					0.0049	0.0067	0.6722	0.4401	0.6169	0.8871	0.0147	0.0112	0.0177	0.0144	0.9384	0.8683	0.8983	0.7311	0.5109	0.6828	0.689	0.798	0.5958
	1724			N-linoleoyltaurine*	LC/MS neg	61826					18.51	0.52	0.68	0.03	0.04	1.32	2.38	0.48	0.64	0.2	0.27	1.33	2.05	0.26	1.9	1.92					8.5388e-06	0.0001	0.4106	0.3539	0.6984	0.8871	5.852e-07	1.8281e-05	2.4375e-06	3.7977e-05	0.6613	0.8461	0.499	0.6496	0.3627	0.659	0.9954	0.8436	0.1168
	1726			linoleoyl ethanolamide	LC/MS neg	52608		HMDB12252	5283446		1.13	0.9	0.85	0.8	0.75	0.94	0.49	0.63	0.89	1.29	1.82	1.41	1.18	0.51	0.82	1.23					0.8556	0.3065	0.6937	0.4482	0.7099	0.8871	0.832	0.283	0.8491	0.2697	0.9825	0.8797	0.2457	0.5472	0.6044	0.7037	0.691	0.798	0.5157
	1734			palmitoleoyl ethanolamide*	LC/MS pos late	57541		HMDB13648	9835868		0.18	0.39	0.55	2.15	3.09	1.43	0.22	0.41	0.37	1.84	1.66	0.9	0.53	0.65	0.56	0.35					0.0017	0.0032	0.2384	0.2756	0.3214	0.8454	0.0357	0.0239	0.0229	0.0173	0.848	0.8554	0.0169	0.2378	0.1643	0.5607	0.1049	0.4829	0.288
	1738			N-oleoylserine	LC/MS neg	57664					10.08	0.83	1.74	0.08	0.17	2.1	2.69	0.92	0.95	0.34	0.35	1.03	0.9	0.24	1	0.49					4.9479e-05	0.0003	0.7296	0.4541	0.3631	0.8519	1.652e-05	8.6226e-05	0.0008	0.0013	0.2121	0.7603	0.2826	0.574	0.8572	0.7598	0.9091	0.8244	0.2113
	1743		Inositol Metabolism	myo-inositol	LC/MS polar	1124	C00137	HMDB00211	892		0.56	0.76	0.98	1.35	1.74	1.29	0.8	0.79	0.71	0.99	0.89	0.89	1.21	1.71	1.26	0.87					0.0027	0.0045	0.2172	0.2676	0.948	0.9027	0.0595	0.0361	0.0033	0.0039	0.2418	0.7603	0.1832	0.5149	0.2819	0.6103	0.1779	0.6415	0.7934
	1752			inositol 1-phosphate (I1P)	LC/MS polar	43849	C01177	HMDB00213	440194		1.27	0.61	1	0.48	0.78	1.64	0.89	0.74	0.18	0.84	0.21	0.25	2.57	1.78	3.14	0.47					0.4725	0.2012	0.4387	0.3619	0.8909	0.9027	0.1396	0.0734	0.3931	0.1509	0.5232	0.8193	0.246	0.5472	0.3883	0.6652	0.0021	0.0635	0.7618
	1772		Phospholipid Metabolism	choline	LC/MS pos early	15506	C00114	HMDB00097	305		1.13	0.76	0.94	0.67	0.83	1.24	1.52	1.26	1.29	0.83	0.85	1.02	0.8	1.07	1.33	1.09					0.3168	0.1506	0.2196	0.2683	0.8081	0.8942	0.0293	0.0202	0.2156	0.0945	0.3221	0.7603	0.0361	0.3256	0.2063	0.5696	0.2619	0.7007	0.3819
	1773			choline phosphate	LC/MS pos early	34396	C00588	HMDB01565	1014		4.33	1.15	0.9	0.27	0.21	0.79	3.78	1.75	1.53	0.46	0.41	0.88	0.89	0.78	1.35	1.51					0.0001	0.0007	0.5861	0.4077	0.8268	0.8989	0.0008	0.001	7.5861e-05	0.0002	0.4463	0.7742	0.0017	0.0874	0.1337	0.5072	0.2067	0.6623	0.0742
	1774			cytidine 5'-diphosphocholine	LC/MS pos early	34418	C00307	HMDB01413	13804		1.98	1.46	1.23	0.74	0.62	0.84	2.13	1.48	0.95	0.7	0.45	0.65	1.95	2.09	1.97	1.51					0.1454	0.0852	0.4471	0.3622	0.4423	0.8649	0.4774	0.1934	0.0293	0.0205	0.1305	0.7378	0.1517	0.5026	0.5065	0.6828	0.7137	0.8003	0.4335
	1776			glycerophosphorylcholine (GPC)	LC/MS pos early	15990	C00670	HMDB00086	71920		2.36	0.77	0.93	0.32	0.39	1.21	1.49	1.43	0.75	0.96	0.51	0.53	1.01	0.64	1.87	0.82					0.0034	0.0052	0.377	0.3347	0.7727	0.8871	0.0003	0.0004	0.0015	0.0022	0.5503	0.8345	0.1928	0.5289	0.1735	0.5607	0.3934	0.7458	0.9516
	1778			phosphoethanolamine	LC/MS neg	1600	C00346	HMDB00224	1015		0.75	0.88	0.61	1.17	0.82	0.7	1.87	1.7	1.26	0.91	0.68	0.74	0.94	2.34	1.83	1.94					0.2524	0.1306	0.822	0.4709	0.0521	0.5877	0.3555	0.1564	0.4055	0.1538	0.0834	0.7205	0.3012	0.5874	0.2119	0.5696	0.6025	0.7837	0.826
	1779			cytidine-5'-diphosphoethanolamine	LC/MS polar	34410	C00570	HMDB01564	123727		2.07	1.58	1.32	0.77	0.64	0.83	1.83	1.06	0.98	0.58	0.54	0.93	1.71	1.51	1.14	1.27					0.0762	0.0538	0.3662	0.3291	0.7659	0.8871	0.3703	0.1613	0.0403	0.0257	0.232	0.7603	0.1646	0.5138	0.8584	0.7598	0.7644	0.8101	0.2236
	1780			glycerophosphoethanolamine	LC/MS polar	37455	C01233	HMDB00114	123874		1.55	0.73	0.95	0.47	0.61	1.3	1.2	1.4	0.86	1.17	0.72	0.61	1.12	0.86	2.15	1.02					0.0383	0.0309	0.6192	0.4237	0.9011	0.9027	0.0117	0.0093	0.0288	0.0204	0.709	0.8488	0.5567	0.6611	0.2917	0.6103	0.73	0.8006	0.6368
	1781			glycerophosphoserine*	LC/MS pos early	57404			3081457		1.88	0.57	0.6	0.3	0.32	1.05	1.56	1.64	0.69	1.05	0.44	0.42	0.84	0.7	2.41	0.97					0.0106	0.0118	0.0447	0.1585	0.0255	0.4924	2.5839e-05	0.0001	1.1745e-05	8.9735e-05	0.805	0.8554	0.1066	0.4657	0.0736	0.4299	0.1168	0.5126	0.853
	1782			glycerophosphoinositol*	LC/MS polar	47155			167572		2.01	0.69	0.51	0.34	0.25	0.74	1.39	1.12	0.83	0.8	0.6	0.74	1.16	0.8	1.89	1.91					0.0042	0.006	0.5322	0.3895	0.0413	0.5877	0.0007	0.001	7.4562e-06	8.9735e-05	0.1472	0.7427	0.224	0.5472	0.6429	0.7037	0.4054	0.7458	0.447
	1783			trimethylamine N-oxide	LC/MS pos early	40406	C01104	HMDB00925	1145		0.62	0.78	0.43	1.24	0.69	0.55	2.66	1.77	1	0.66	0.38	0.57	0.14	0.59	0.31	0.32					0.7932	0.2918	0.78	0.4595	0.3433	0.8454	0.5886	0.2202	0.2285	0.0981	0.5018	0.8161	0.0198	0.2502	0.1236	0.5032	0.5034	0.7737	0.3982
	2338		Glycerolipid Metabolism	glycerol	LC/MS neg	15122	C00116	HMDB00131	753		2.11	0.83	0.99	0.39	0.47	1.19	2.8	1.32	0.87	0.47	0.31	0.66	0.89	1.18	1.41	0.79					0.0003	0.0011	0.4147	0.3545	0.9352	0.9027	2.7001e-05	0.0001	0.0004	0.0009	0.3704	0.7603	9.2049e-05	0.0194	0.1861	0.5607	0.4905	0.7737	0.0046
	2339			glycerol 3-phosphate	LC/MS pos early	43847	C00093	HMDB00126	754		2.71	0.98	0.86	0.36	0.32	0.89	1.94	0.84	1.39	0.43	0.71	1.66	0.77	0.55	0.66	1.23					0.002	0.0036	0.4119	0.354	0.6264	0.8871	0.0179	0.0132	0.0077	0.0074	0.7367	0.851	0.3529	0.6315	0.3913	0.6652	0.372	0.7458	0.0784
	2344			glycerophosphoglycerol	LC/MS polar	48857	C03274		439964		6.61	0.75	0.75	0.11	0.11	1	1.37	1.37	0.91	1	0.67	0.66	1.2	0.25	2.19	1.46					4.4205e-06	0.0001	0.4517	0.3649	0.4105	0.8649	3.7955e-07	1.711e-05	3.0091e-07	1.7572e-05	0.9432	0.8683	0.3876	0.6315	0.4793	0.6828	0.7058	0.798	0.8741
	2462		Sphingolipid Synthesis	sphinganine	LC/MS pos late	17769	C00836	HMDB00269	3126		1.29	0.56	1.07	0.43	0.83	1.91	1.64	0.57	1.37	0.35	0.84	2.39	1.25	1.58	1.28	1.59					0.3392	0.1581	0.161	0.2439	0.7476	0.8871	0.0214	0.0152	0.5237	0.1878	0.0874	0.7205	0.8851	0.7291	0.2101	0.5696	0.4131	0.7458	0.2659
	2464			sphingadienine	LC/MS pos late	57426			6449795		0.98	0.46	0.8	0.47	0.82	1.76	0.83	1.5	0.55	1.8	0.66	0.37	1.09	0.93	3.59	0.75					0.6974	0.2689	0.0286	0.1408	0.3204	0.8454	0.0111	0.009	0.1698	0.0806	0.2132	0.7603	0.6477	0.6738	0.3694	0.659	0.0547	0.3992	0.1789
	2465			phytosphingosine	LC/MS pos late	1510	C12144	HMDB04610	122121		0.68	0.31	0.73	0.45	1.08	2.38	0.44	0.36	0.34	0.82	0.78	0.95	3.06	1.96	3.56	1.42					0.9389	0.3272	0.2119	0.2673	0.5674	0.8871	0.1859	0.0939	0.517	0.1862	0.4929	0.807	0.8452	0.7179	0.252	0.5953	0.7207	0.8003	0.34
	2582		Sphingosines	sphingosine	LC/MS pos late	17747	C00319	HMDB00252	5353955		1	0.44	1.24	0.44	1.25	2.8	1.47	0.99	1.18	0.68	0.8	1.19	0.97	1.44	2.18	0.92					0.7198	0.2727	0.0491	0.1605	0.7365	0.8871	0.0216	0.0153	0.9823	0.2981	0.0228	0.5933	0.5648	0.6611	0.9195	0.7741	0.6867	0.798	0.6347
	2590			hexadecasphingosine (d16:1)*	LC/MS pos late	57428					4.09	0.61	1.46	0.15	0.36	2.39	1.32	0.97	0.64	0.74	0.48	0.66	1.43	0.46	2.28	0.63					0.0028	0.0046	0.2475	0.2795	0.7763	0.8871	8.9481e-05	0.0002	0.0061	0.0062	0.1522	0.76	0.988	0.7488	0.8593	0.7598	0.4171	0.7458	0.8711
	2591			heptadecasphingosine (d17:1)	LC/MS pos late	57427			5283557		3.47	0.81	4.26	0.23	1.23	5.28	0.81	0.64	0.55	0.79	0.68	0.86	2.7	0.63	2.15	0.35					0.0103	0.0117	0.7276	0.4541	0.1762	0.8072	0.0041	0.004	0.1959	0.0882	0.0917	0.7308	0.9473	0.7457	0.7905	0.7467	0.5261	0.7737	0.7401
	2592			eicosanoylsphingosine (d20:1)*	LC/MS pos late	57597					0.31	0.2	1.23	0.64	3.9	6.08	0.26	0.14	0.49	0.53	1.88	3.53	2.4	2	1.66	0.97					0.0174	0.0169	0.004	0.0734	0.7709	0.8871	0.5684	0.217	0.0345	0.023	0.0086	0.527	0.0715	0.4046	0.0072	0.2138	0.7165	0.8003	0.333
	2598		Mevalonate Metabolism	3-hydroxy-3-methylglutarate	LC/MS polar	531	C03761	HMDB00355	1662		1.46	0.51	0.97	0.35	0.66	1.9	1.11	2.24	0.92	2.02	0.83	0.41	1.38	1.04	6.01	1.3					0.121	0.0745	0.0747	0.1824	0.6911	0.8871	0.0015	0.0017	0.0541	0.032	0.1605	0.7603	0.8093	0.7084	0.0601	0.3962	0.9209	0.8253	0.0985
	2612		Sterol	desmosterol	LC/MS pos late	6065	C01802	HMDB02719	439577		0.51	0.42	1.17	0.83	2.28	2.76	1.49	1.11	0.79	0.75	0.53	0.71	1.35	3.9	3.54	0.91					0.1636	0.0938	0.1464	0.2419	0.9254	0.9027	0.9509	0.3099	0.138	0.0678	0.123	0.7378	0.9289	0.7402	0.9598	0.7866	0.9909	0.8436	0.889
	2613			cholesterol	LC/MS pos late	63	C00187	HMDB00067	11025495		1.67	0.74	1.25	0.45	0.75	1.67	1.12	0.9	0.79	0.8	0.7	0.87	1.42	0.96	1.72	0.9					0.0284	0.0245	0.2034	0.2614	0.4486	0.8649	0.001	0.0012	0.1392	0.068	0.0461	0.7068	0.4427	0.6493	0.8497	0.7598	0.3004	0.7314	0.3398
	2624			7-alpha-hydroxy-3-oxo-4-cholestenoate (7-Hoca)	LC/MS neg	36776	C17337	HMDB12458	3081085		0.85	0.85	0.92	1	1.09	1.09	1.74	1.49	1.62	0.85	0.93	1.09	0.52	1.07	0.91	0.91					0.8454	0.3053	0.9573	0.5186	0.7381	0.8871	0.8876	0.2942	0.5971	0.2069	0.6982	0.8461	0.4171	0.6315	0.7024	0.719	0.3694	0.7458	0.6657
	2637			4-cholesten-3-one	LC/MS pos late	38125	C00599	HMDB00921	91477		0.56	0.9	0.77	1.61	1.37	0.85	0.77	0.78	0.67	1.01	0.86	0.86	1.5	2.05	1.29	1.29					0.081	0.0569	0.87	0.4911	0.4455	0.8649	0.1118	0.0607	0.3139	0.1265	0.548	0.8345	0.3109	0.5963	0.4648	0.68	0.3322	0.745	0.7747
	2640			campesterol	LC/MS pos late	33997	C01789	HMDB02869	173183		4.08	0.76	1.36	0.19	0.33	1.78	1.41	1.42	0.65	1.01	0.46	0.46	0.68	0.24	1.28	0.33					0.0011	0.0024	0.508	0.3841	0.6377	0.8871	0.0001	0.0003	0.004	0.0045	0.26	0.7603	0.2801	0.5738	0.6759	0.7055	0.4642	0.7737	0.5044
	2657			7-hydroxycholesterol (alpha or beta)	LC/MS pos late	47890		HMDB06119	107722		0.99	0.82	1.88	0.83	1.91	2.3	0.41	0.11	0.12	0.28	0.28	1.03	22.91	9.6	3.19	1.43					0.9524	0.3297	0.7774	0.4595	0.3959	0.8649	0.8235	0.282	0.3639	0.1422	0.2599	0.7603	0.1963	0.5315	0.2071	0.5696	0.3395	0.745	0.9747
	2706		Progestin Steroids	20a-dihydroprogesterone	LC/MS pos late	39761	C04042	HMDB03069	92747		0.05	0.18	0.33	3.47	6.62	1.91	2.45	3.48	4.82	1.42	1.97	1.38	0.05	2.24	0.92	0.67					0.0016	0.0032	0.3634	0.3291	0.0705	0.6351	0.0184	0.0135	0.1367	0.0674	0.3534	0.7603	0.2091	0.5472	0.1263	0.5032	0.0259	0.2771	0.7772
	2711		Corticosteroids	corticosterone	LC/MS neg	5983	C02140	HMDB01547	5753		0.74	0.54	0.75	0.73	1.02	1.39	1.98	0.39	1.24	0.2	0.63	3.17	1.33	3.58	0.97	2.2					0.5948	0.2378	0.0276	0.1404	0.3409	0.8454	0.0878	0.05	0.6711	0.223	0.1937	0.7603	0.2504	0.5493	0.0186	0.2763	0.5172	0.7737	0.0008
	2808		Primary Bile Acid Metabolism	cholate	LC/MS neg	22842	C00695	HMDB00619	221493		7.96	0.33	0.33	0.04	0.04	1.01	0.28	0.06	0.11	0.22	0.41	1.88	2.32	0.08	0.43	0.8					0.0116	0.0125	0.0452	0.1585	0.1021	0.6884	2.9443e-05	0.0001	0.0001	0.0003	0.6956	0.8461	0.1779	0.5138	0.0044	0.1779	0.018	0.2243	0.1073
	2810			taurocholate	LC/MS neg	18497	C05122	HMDB00036	6675		5.12	0.15	0.08	0.03	0.02	0.54	0.12	0.02	0	0.14	0.03	0.22	12.2	0.29	1.43	0.57					0.2605	0.1341	0.0344	0.1516	0.0216	0.4915	0.0019	0.002	0.0011	0.0015	0.8418	0.8554	0.1985	0.5342	0.0808	0.4403	0.001	0.0453	0.6311
	2813			taurochenodeoxycholate	LC/MS neg	18494	C05465	HMDB00951	387316		15.5	0.2	0.1	0.01	0.01	0.52	0.31	0.01	0.01	0.03	0.02	0.61	17.89	0.35	0.85	1					0.0896	0.0617	0.1111	0.2146	0.0579	0.5877	0.0017	0.0018	0.0007	0.0011	0.7482	0.8554	0.1509	0.5026	0.0136	0.2763	0.0065	0.1179	0.2703
	2814			beta-muricholate	LC/MS neg	31885	C17726	HMDB00415	5283853		22.12	0.62	0.68	0.03	0.03	1.1	3.84	0.08	0.18	0.02	0.05	2.11	2.52	0.44	0.34	0.66					0.0042	0.006	0.1387	0.2354	0.4977	0.8649	4.9826e-05	0.0001	0.0006	0.0011	0.4134	0.7603	0.8463	0.7179	0.0267	0.3082	0.1885	0.6487	0.0416
	2817			tauro-beta-muricholate	LC/MS neg	33983		HMDB00932	168408		9.61	0.2	0.04	0.02	0	0.22	0.19	0.01	0	0.06	0.01	0.16	15.34	0.3	0.82	0.58					0.193	0.105	0.0677	0.1742	0.0159	0.4855	0.0027	0.0027	0.0004	0.0009	0.5265	0.8193	0.4804	0.6496	0.1984	0.563	0.0033	0.0828	0.5549
	2828		Secondary Bile Acid Metabolism	deoxycholate	LC/MS neg	1114	C04483	HMDB00626	222528		0.16	0.14	0.12	0.84	0.72	0.85	0.55	0.24	0.12	0.43	0.22	0.5	1.41	4.81	2.48	1.46					0.0126	0.0131	0.005	0.0736	0.0016	0.2089	0.7195	0.2554	0.4445	0.1646	0.6836	0.8461	0.1366	0.4901	0.0497	0.3894	0.0011	0.0453	0.6162
	2831			taurodeoxycholate	LC/MS neg	12261	C05463	HMDB00896	2733768		11.57	0.18	0.12	0.02	0.01	0.69	0.06	0.01	0.01	0.23	0.13	0.57	22.19	0.11	1.65	1.37					0.1397	0.0832	0.0706	0.1785	0.0463	0.5877	0.0017	0.0019	0.001	0.0015	0.8431	0.8554	0.0383	0.3265	0.0188	0.2763	0.003	0.0777	0.7605
	2847			tauroursodeoxycholate	LC/MS neg	39378		HMDB00874	9848818		20.33	0.18	0.09	0.01	0	0.54	0.15	0.01	0	0.04	0.02	0.61	25.92	0.19	0.89	1					0.0595	0.0436	0.1536	0.2439	0.0885	0.6574	0.0016	0.0017	0.0007	0.0011	0.7722	0.8554	0.2794	0.5738	0.0403	0.3808	0.019	0.2306	0.3124
	3437	Nucleotide	Purine Metabolism, (Hypo)Xanthine/Inosine containing	AICA ribonucleotide	LC/MS pos early	38325	C04677	HMDB01517	65110		1.59	0.92	0.55	0.58	0.34	0.6	1.58	1.3	0.97	0.82	0.61	0.75	0.86	0.85	1.21	1.52					0.1226	0.0747	0.9405	0.5145	0.1931	0.8271	0.1409	0.0739	0.006	0.0062	0.1696	0.7603	0.5783	0.6632	0.6153	0.7037	0.8669	0.8189	0.9573
	3440			inosine 5'-monophosphate (IMP)	LC/MS polar	2133	C00130	HMDB00175	8582		2.14	2.72	1.95	1.27	0.91	0.72	0.55	0.16	0.33	0.29	0.61	2.06	4.67	1.19	0.28	0.79					0.0273	0.0238	0.0452	0.1585	0.7557	0.8871	0.8241	0.282	0.0549	0.0322	0.0871	0.7205	0.8129	0.7084	0.1179	0.5032	0.1916	0.6487	0.0738
	3441			inosine	LC/MS neg	1123	C00294	HMDB00195	6021		3.54	1.01	1.06	0.28	0.3	1.05	1.22	1.1	0.91	0.9	0.75	0.83	1.16	0.4	1.28	1					0.0002	0.0009	0.9607	0.5186	0.8218	0.8989	0.0003	0.0004	0.0005	0.0009	0.8603	0.8554	0.5314	0.659	0.7917	0.7467	0.8827	0.8189	0.7167
	3442			hypoxanthine	LC/MS neg	3127	C00262	HMDB00157	790		1.45	0.79	0.61	0.55	0.42	0.78	1.23	1.32	1.06	1.07	0.86	0.8	0.95	0.81	1.59	1.64					0.0437	0.0335	0.4418	0.3619	0.1136	0.6884	0.0067	0.006	0.0006	0.0011	0.4055	0.7603	0.4355	0.6455	0.3353	0.6447	0.9822	0.8436	0.8522
	3443			xanthine	LC/MS neg	3147	C00385	HMDB00292	1188		1.2	0.65	0.69	0.55	0.58	1.06	1.3	1.23	1.09	0.95	0.84	0.88	0.85	0.93	1.61	1.35					0.1334	0.08	0.0543	0.1673	0.0932	0.6574	0.0011	0.0013	0.0023	0.003	0.7943	0.8554	0.1812	0.5138	0.3143	0.628	0.7058	0.798	0.7343
	3444			xanthosine 5'-monophosphate (xmp)	LC/MS neg	12024	C00655	HMDB01554	73323		2.89	1.82	1.32	0.63	0.46	0.72	2.78	1.13	1.6	0.4	0.58	1.42	1.13	1.09	0.7	1.37					0.0026	0.0044	0.0722	0.1793	0.3877	0.8649	0.181	0.0917	0.0246	0.0182	0.3361	0.7603	0.0856	0.4413	0.6222	0.7037	0.5187	0.7737	0.2127
	3445			xanthosine	LC/MS pos early	15136	C01762	HMDB00299	64959		7.98	0.45	0.39	0.06	0.05	0.87	4.02	1.43	0.76	0.36	0.19	0.53	0.61	0.31	1.95	1.2					0.0004	0.0013	0.2336	0.2756	0.036	0.583	1.0627e-05	7.7893e-05	4.8175e-07	1.9369e-05	0.3427	0.7603	0.0362	0.3256	0.3532	0.6538	0.4866	0.7737	0.2266
	3448			N1-methylinosine	LC/MS pos early	48351		HMDB02721	65095		1.03	0.57	1.38	0.56	1.35	2.41	1.09	0.64	0.74	0.59	0.68	1.15	1.54	1.64	1.73	0.82					0.7038	0.2693	0.2135	0.2673	0.8048	0.8942	0.1074	0.0589	0.8939	0.2793	0.1382	0.7378	0.9546	0.7458	0.3053	0.6221	0.4054	0.7458	0.2797
	3449			2'-deoxyinosine	LC/MS neg	15076	C05512	HMDB00071	65058		0.82	0.44	0.63	0.53	0.76	1.44	0.85	1.22	0.81	1.44	0.96	0.67	0.93	0.96	2.6	1.21					0.9197	0.3232	0.0919	0.1941	0.1526	0.7532	0.075	0.0436	0.1267	0.0634	0.7898	0.8554	0.6736	0.6741	0.9514	0.7841	0.7241	0.8003	0.6299
	3451			urate	LC/MS neg	1604	C00366	HMDB00289	1175		0.51	0.47	0.68	0.91	1.32	1.44	1.05	1.19	0.91	1.13	0.86	0.76	0.68	1.39	1.72	0.91					0.0016	0.0032	0.0382	0.1548	0.2624	0.8454	0.2203	0.1077	0.0299	0.0206	0.3203	0.7603	0.8514	0.7184	0.6513	0.7054	0.7069	0.798	0.5232
	3452			uric acid ribonucleoside*	LC/MS neg	62102			164933		2.61	0.3	0.38	0.12	0.15	1.26	1.1	0.98	0.42	0.9	0.38	0.42	1.24	0.52	4.03	1.36					0.0384	0.0309	0.0017	0.0561	0.006	0.284	2.3506e-06	4.1185e-05	1.039e-05	8.9735e-05	0.6459	0.8461	0.534	0.659	0.4585	0.68	0.1895	0.6487	0.9041
	3453			allantoin	LC/MS polar	1107	C02350	HMDB00462	204		2.92	0.71	1.19	0.24	0.41	1.69	1.01	0.43	0.77	0.42	0.76	1.8	1.73	0.6	1.05	1.11					0.0015	0.0031	0.2313	0.2756	0.758	0.8871	3.7845e-05	0.0001	0.0035	0.0041	0.1349	0.7378	0.7181	0.6877	0.016	0.2763	0.3985	0.7458	0.0375
	3458		Purine Metabolism, Adenine containing	adenosine 5'-diphosphate (ADP)	LC/MS neg	3108	C00008	HMDB01341	6022		1.92	1.8	1.23	0.94	0.64	0.68	1.23	0.93	1.28	0.76	1.04	1.37	1.73	1.11	0.9	1.8					0.0298	0.0251	0.1174	0.2183	0.7789	0.8871	0.518	0.2044	0.0558	0.0326	0.1951	0.7603	0.5904	0.6632	0.8023	0.7535	0.8798	0.8189	0.4315
	3459			adenosine 5'-monophosphate (AMP)	LC/MS pos early	32342	C00020	HMDB00045	6083		7.52	2.72	2.17	0.36	0.29	0.8	3.2	1.51	1.75	0.47	0.55	1.16	2.06	0.88	1.14	1.66					1.5725e-05	0.0002	0.0144	0.1078	0.088	0.6574	0.0237	0.0167	0.003	0.0036	0.4229	0.7603	0.0103	0.1823	0.2718	0.6098	0.4337	0.7558	0.1225
	3460			adenosine 3'-monophosphate (3'-AMP)	LC/MS neg	35142	C01367	HMDB03540	41211		0.91	0.46	0.69	0.51	0.77	1.5	3.59	0.66	0.51	0.18	0.14	0.78	1.52	6.01	2.15	1.12					0.7075	0.27	0.0862	0.1932	0.2154	0.8337	0.175	0.0895	0.3836	0.1479	0.6199	0.8455	0.2376	0.5472	0.5115	0.6828	0.2379	0.688	0.0701
	3461			adenosine 2'-monophosphate (2'-AMP)	LC/MS neg	36815	C00946	HMDB11617	94136		1.37	0.58	0.37	0.42	0.27	0.65	1.1	0.91	0.65	0.82	0.59	0.72	1.49	1.2	2.35	2.6					0.4009	0.1781	0.0483	0.1605	0.0057	0.284	0.0063	0.0057	0.0005	0.001	0.3825	0.7603	0.3018	0.5874	0.521	0.6828	0.4673	0.7737	0.6923
	3462			adenosine 3',5'-cyclic monophosphate (cAMP)	LC/MS neg	2831	C00575	HMDB00058	6076		1.13	0.78	0.94	0.69	0.83	1.2	0.98	0.91	0.72	0.93	0.73	0.78	1.17	1.01	1.36	0.89					0.6478	0.2518	0.5613	0.3989	0.7006	0.8871	0.3018	0.1374	0.4017	0.1528	0.8436	0.8554	0.9951	0.7488	0.911	0.7741	0.5524	0.7773	0.9061
	3463			adenosine-2',3'-cyclic monophosphate	LC/MS neg	37467	C02353	HMDB11616	2024		0.49	0.34	1.42	0.7	2.91	4.17	0.36	0.22	0.33	0.61	0.92	1.51	1.72	1.26	1.09	0.4					0.4942	0.2076	0.178	0.2515	0.834	0.8989	0.4998	0.1996	0.6345	0.216	0.2529	0.7603	0.4423	0.6493	0.2192	0.5696	0.4092	0.7458	0.6393
	3464			adenosine 3',5'-diphosphate	LC/MS neg	15691	C00054	HMDB00061	159296		2.18	0.78	0.6	0.36	0.27	0.77	1.52	0.9	0.69	0.59	0.45	0.77	1.33	0.93	1.53	1.53					0.0197	0.0185	0.2488	0.2797	0.1176	0.6884	0.0009	0.0011	0.0002	0.0006	0.67	0.8461	0.4044	0.6315	0.81	0.7543	0.3116	0.7314	0.2846
	3465			adenylosuccinate	LC/MS neg	18360	C03794	HMDB00536	195		20.5	4.02	3.6	0.2	0.18	0.89	9.1	2.6	2.92	0.29	0.32	1.12	2.66	1.18	1.71	2.16					9.8211e-06	0.0001	0.0214	0.1319	0.0993	0.6853	0.0111	0.009	0.0017	0.0023	0.4838	0.8018	0.0014	0.0874	0.1367	0.5104	0.2276	0.6744	0.0641
	3466			adenosine	LC/MS pos early	555	C00212	HMDB00050	60961		4.01	2.52	2.64	0.63	0.66	1.05	1.15	1.04	1.5	0.91	1.31	1.44	1.87	0.54	0.78	1.06					0.002	0.0036	0.0712	0.1785	0.0424	0.5877	0.1541	0.0801	0.2338	0.0992	0.8086	0.8554	0.6375	0.6738	0.5804	0.6936	0.1362	0.5716	0.9346
	3467			adenine	LC/MS pos early	554	C00147	HMDB00034	190		16.67	1.59	1.81	0.1	0.11	1.13	2.78	1.3	1.59	0.47	0.57	1.22	2	0.33	1.63	1.76					1.2862e-05	0.0002	0.3251	0.3133	0.4058	0.8649	0.0003	0.0004	0.0002	0.0004	0.8768	0.8554	0.1049	0.4657	0.4154	0.6652	0.5914	0.7812	0.4078
	3472			N1-methyladenosine	LC/MS pos early	15650	C02494	HMDB03331	27476		2.17	0.58	1.13	0.27	0.52	1.96	1.34	1.1	1.03	0.82	0.76	0.93	1.18	0.73	2.24	1.07					0.0154	0.0154	0.0942	0.1962	0.88	0.9027	0.0001	0.0003	0.0222	0.0168	0.0693	0.7068	0.5078	0.65	0.8373	0.7598	0.8751	0.8189	0.6469
	3473			N6-methyladenosine	LC/MS pos early	37114		HMDB04044	1869		1.34	0.3	0.35	0.22	0.26	1.2	1.05	1.51	1.05	1.44	1.01	0.7	0.59	0.46	3	1.75					0.1584	0.0913	0.0412	0.1583	0.0736	0.6351	0.001	0.0013	0.0022	0.0029	0.7872	0.8554	0.6426	0.6738	0.256	0.5954	0.6427	0.798	0.4975
	3482			N6-carbamoylthreonyladenosine	LC/MS neg	35157		HMDB41623	161466		1.48	0.5	0.86	0.34	0.58	1.7	1.43	1.01	0.82	0.71	0.57	0.81	0.97	0.94	1.95	0.92					0.1333	0.08	0.1481	0.242	0.51	0.8687	0.0045	0.0043	0.0339	0.0226	0.4229	0.7603	0.6619	0.6741	0.8605	0.7598	0.4872	0.7737	0.5405
	3485			2'-deoxyadenosine 5'-monophosphate	LC/MS neg	46333	C00360	HMDB00905	12599		1.29	1.03	0.86	0.8	0.66	0.83	0.93	1.02	0.65	1.09	0.69	0.64	2.19	1.58	2.16	1.65					0.5072	0.211	0.9036	0.5036	0.8974	0.9027	0.5872	0.2202	0.429	0.1603	0.8025	0.8554	0.7346	0.6911	0.8973	0.774	0.6935	0.798	0.64
	3487			2'-deoxyadenosine	LC/MS pos early	1553	C00559	HMDB00101	13730		0.42	0.62	1.44	1.46	3.42	2.34	0.43	0.48	0.84	1.11	1.94	1.75	1.21	1.24	0.94	0.7					0.1808	0.1	0.421	0.3556	0.7681	0.8871	0.5861	0.2202	0.105	0.0548	0.2737	0.7603	0.0622	0.3701	0.0813	0.4403	0.8228	0.8152	0.8972
	3492			N6-succinyladenosine	LC/MS neg	48130		HMDB00912	165243		2.43	1.64	2.27	0.68	0.93	1.38	3.4	0.66	1.93	0.2	0.57	2.91	1.57	2.2	0.63	1.34					0.0456	0.0345	0.3653	0.3291	0.3336	0.8454	0.258	0.122	0.2846	0.1172	0.9501	0.8683	0.0391	0.3265	0.5875	0.6959	0.4886	0.7737	0.0106
	3495		Purine Metabolism, Guanine containing	guanosine 5'- monophosphate (5'-GMP)	LC/MS pos early	2849	C00144	HMDB01397	6804		5.56	2.63	2.64	0.47	0.48	1	3.57	1.46	1.75	0.41	0.49	1.2	2.1	1.35	1.16	1.39					6.026e-05	0.0004	0.0092	0.0974	0.0207	0.4915	0.0881	0.05	0.0444	0.0276	0.745	0.8554	0.0097	0.1823	0.3551	0.6539	0.5228	0.7737	0.0827
	3496			guanosine 3'-monophosphate (3'-GMP)	LC/MS neg	39786			3522		0.69	0.33	0.89	0.48	1.29	2.69	4.85	0.54	0.42	0.11	0.09	0.79	1.61	11.29	2.63	0.77					0.192	0.1047	0.1384	0.2354	0.5798	0.8871	0.8544	0.288	0.4465	0.1646	0.346	0.7603	0.9335	0.7402	0.6284	0.7037	0.1714	0.6415	0.6885
	3500			guanosine	LC/MS pos early	1573	C00387	HMDB00133	6802		2.07	1.58	2.06	0.76	0.99	1.3	0.89	0.86	1.09	0.97	1.23	1.27	1.63	0.7	0.89	0.86					0.0087	0.0104	0.1576	0.2439	0.0537	0.5877	0.1945	0.0966	0.445	0.1646	0.5868	0.8385	0.7053	0.6877	0.6717	0.7054	0.7165	0.8003	0.9634
	3501			guanine	LC/MS pos early	32352	C00242	HMDB00132	764		2.18	1.48	1.77	0.68	0.81	1.19	1.37	1.56	1.41	1.14	1.04	0.91	0.94	0.59	0.99	0.75					0.0115	0.0124	0.2822	0.292	0.1982	0.8337	0.1272	0.0679	0.188	0.0857	0.8284	0.8554	0.1801	0.5138	0.1015	0.4851	0.1513	0.5937	0.7568
	3503			7-methylguanine	LC/MS pos early	35114	C02242	HMDB00897	11361		1.17	0.47	0.9	0.4	0.78	1.94	0.76	0.61	0.53	0.8	0.7	0.87	1.51	0.99	1.98	0.89					0.3346	0.1567	0.0119	0.103	0.7142	0.8871	0.0008	0.0011	0.1861	0.0853	0.0289	0.6606	0.3835	0.6315	0.199	0.563	0.0772	0.4553	0.6731
	3509			N2,N2-dimethylguanosine	LC/MS pos early	35137		HMDB04824	92919		0.81	0.51	1.43	0.63	1.77	2.82	1.33	1.42	1	1.07	0.75	0.7	0.95	1.56	2.67	0.66					0.7666	0.2867	0.1986	0.2609	0.7749	0.8871	0.3193	0.1443	0.9914	0.2997	0.3141	0.7603	0.8345	0.715	0.3949	0.6652	0.918	0.8252	0.5195
	3517			2'-deoxyguanosine	LC/MS neg	1411	C00330	HMDB00085	187790		0.48	0.5	1.01	1.05	2.12	2.02	0.6	0.84	0.99	1.4	1.65	1.17	0.85	1.07	1.43	0.83					0.0229	0.0207	0.1054	0.2077	0.7699	0.8871	0.4818	0.194	0.0447	0.0276	0.1807	0.7603	0.1433	0.4971	0.318	0.6293	0.9476	0.8351	0.6327
	3522		Pyrimidine Metabolism, Orotate containing	orotate	LC/MS polar	1505	C00295	HMDB00226	967		0.56	0.76	0.97	1.36	1.74	1.28	1.53	1.16	1.36	0.75	0.89	1.18	1.06	2.9	1.6	1.48					0.5377	0.2192	0.7709	0.4595	0.9038	0.9027	0.7443	0.2616	0.6198	0.2124	0.8647	0.8554	0.8124	0.7084	0.8589	0.7598	0.944	0.8336	0.9524
	3524			orotidine	LC/MS polar	35172		HMDB00788	92751		0.52	0.93	0.88	1.8	1.7	0.95	0.96	0.88	1.15	0.92	1.2	1.31	1.13	2.09	1.07	1.47					0.0151	0.0153	0.7145	0.4523	0.7675	0.8871	0.0359	0.0239	0.0305	0.0208	0.9439	0.8683	0.8242	0.7093	0.6654	0.7054	0.6229	0.7912	0.8332
	3527		Pyrimidine Metabolism, Uracil containing	uridine 5'-triphosphate (UTP)	LC/MS neg	33448	C00075	HMDB00285	6133		0.77	1.76	0.98	2.29	1.28	0.56	0.65	0.72	0.95	1.1	1.46	1.32	1.42	1.22	0.59	1.39					0.9414	0.3274	0.2226	0.2693	0.9032	0.9027	0.251	0.1194	0.9617	0.2934	0.2709	0.7603	0.5314	0.659	0.4418	0.6652	0.2421	0.6956	0.885
	3528			uridine 5'-diphosphate (UDP)	LC/MS neg	5345	C00015	HMDB00295	6031		2.61	2.12	1.46	0.81	0.56	0.69	1.62	1.52	1.43	0.94	0.88	0.94	1.76	1.09	1.26	1.72					0.0246	0.0219	0.1892	0.2554	0.6546	0.8871	0.3231	0.1457	0.0667	0.0378	0.3815	0.7603	0.0995	0.4657	0.209	0.5696	0.4284	0.7522	0.6845
	3529			uridine 5'-monophosphate (UMP)	LC/MS polar	2856	C00105	HMDB00288	6030		6.02	2.75	2.45	0.46	0.41	0.89	3.37	1.29	1.68	0.38	0.5	1.3	2.22	1.24	1.04	1.52					0.0004	0.0011	0.023	0.1342	0.0474	0.5877	0.1337	0.0709	0.0718	0.0398	0.7515	0.8554	0.022	0.2502	0.4619	0.68	0.2995	0.7314	0.1089
	3531			uridine 3'-monophosphate (3'-UMP)	LC/MS neg	39764	C01368		101543		1.03	0.33	4.58	0.32	4.46	13.88	5.02	0.48	0.95	0.1	0.19	1.98	1.82	8.89	2.64	0.38					0.442	0.1907	0.1394	0.2354	0.4571	0.8649	0.4686	0.192	0.1345	0.0667	0.0294	0.6606	0.8409	0.7161	0.5122	0.6828	0.6568	0.798	0.3931
	3533			uridine-2',3'-cyclic monophosphate	LC/MS neg	37137	C02355	HMDB11640	439715		0.98	0.79	1.61	0.8	1.64	2.04	2.06	0.45	1.05	0.22	0.51	2.33	1.14	2.39	0.65	0.75					0.5958	0.2378	0.4416	0.3619	0.6641	0.8871	0.8097	0.2802	0.3368	0.1341	0.2316	0.7603	0.7463	0.6963	0.1156	0.5032	0.5474	0.7773	0.0602
	3534			uridine	LC/MS neg	606	C00299	HMDB00296	6029		1.91	0.63	0.92	0.33	0.48	1.46	1.93	1.23	1.32	0.64	0.68	1.07	0.74	0.74	1.43	1.05					0.0154	0.0154	0.1291	0.2286	0.7794	0.8871	0.0002	0.0004	0.0076	0.0074	0.2123	0.7603	0.0284	0.2854	0.5064	0.6828	0.238	0.688	0.1166
	3535			uracil	LC/MS polar	605	C00106	HMDB00300	1174		0.54	0.5	0.57	0.93	1.06	1.14	1.1	1.58	1.08	1.44	0.98	0.68	0.95	1.94	3.01	1.8					0.0223	0.0204	0.0891	0.1938	0.1263	0.6884	0.5292	0.2065	0.4194	0.1578	0.8572	0.8554	0.8782	0.7268	0.1785	0.5607	0.7869	0.8134	0.2314
	3536			pseudouridine	LC/MS neg	33442	C02067	HMDB00767	15047		0.86	0.58	0.79	0.67	0.92	1.37	0.87	0.95	0.95	1.09	1.09	1.01	1.2	1.22	1.96	1.44					0.8512	0.3059	0.0242	0.1358	0.31	0.8454	0.0373	0.0247	0.4062	0.1538	0.1962	0.7603	0.4996	0.6496	0.8389	0.7598	0.7844	0.8134	0.6362
	3537			5,6-dihydrouridine	LC/MS neg	61833			94312		0.95	0.48	0.66	0.51	0.69	1.36	0.9	0.87	0.91	0.97	1.01	1.04	1.18	1.11	2.11	1.62					0.6875	0.2656	0.0166	0.1168	0.1608	0.771	0.0059	0.0054	0.0741	0.0407	0.2902	0.7603	0.669	0.6741	0.6447	0.7037	0.5909	0.7812	0.9731
	3538			2'-O-methyluridine	LC/MS neg	57655			102212		3.51	0.62	1.4	0.18	0.4	2.25	2.73	1.42	1.16	0.52	0.42	0.82	1.04	0.81	2.38	0.86					0.0027	0.0045	0.3141	0.3106	0.8864	0.9027	0.0001	0.0003	0.0018	0.0024	0.3864	0.7603	0.0415	0.3362	0.4083	0.6652	0.8551	0.8189	0.2113
	3539			5-methyluridine (ribothymidine)	LC/MS neg	35136		HMDB00884	445408		1.25	0.3	0.4	0.24	0.32	1.31	0.67	1.17	0.48	1.74	0.71	0.41	1.17	0.63	4.52	1.41					0.1966	0.1061	0.0337	0.1516	0.0717	0.6351	0.0011	0.0013	0.003	0.0036	0.7285	0.851	0.6345	0.6738	0.6119	0.7037	0.2853	0.7184	0.3279
	3546			5,6-dihydrouracil	LC/MS neg	1559	C00429	HMDB00076	649		1.09	0.74	0.48	0.68	0.44	0.65	0.83	0.79	0.68	0.96	0.82	0.85	1.22	0.93	1.31	1.72					0.631	0.2463	0.7903	0.463	0.233	0.8454	0.8298	0.283	0.4715	0.172	0.3512	0.7603	0.9505	0.7458	0.517	0.6828	0.7294	0.8006	0.478
	3550			2'-deoxyuridine	LC/MS neg	52602	C00526	HMDB00012	13712		0.37	0.34	0.54	0.94	1.47	1.57	0.78	1.35	0.79	1.74	1.02	0.58	0.81	1.71	3.17	1.18					0.002	0.0036	0.0106	0.0984	0.1569	0.7593	0.5317	0.2066	0.0691	0.0388	0.2233	0.7603	0.5984	0.6636	0.516	0.6828	0.5218	0.7737	0.2425
	3553			3-ureidopropionate	LC/MS pos early	3155	C02642	HMDB00026	111		1.02	0.29	0.45	0.29	0.45	1.55	0.41	0.32	0.27	0.77	0.66	0.86	2.4	0.98	2.6	1.44					0.7673	0.2867	0.0002	0.0111	0.0249	0.4924	7.5391e-05	0.0002	0.0121	0.0107	0.0821	0.7205	0.0018	0.0874	0.0008	0.1143	0.0003	0.0203	0.7731
	3554			beta-alanine	LC/MS pos early	55	C00099	HMDB00056	239		4.86	1.09	0.95	0.22	0.19	0.87	2.23	0.94	0.98	0.42	0.44	1.05	1.46	0.67	1.26	1.52					3.8873e-05	0.0003	0.9945	0.525	0.7644	0.8871	3.9727e-05	0.0001	1.4983e-05	9.1556e-05	0.7592	0.8554	0.1495	0.5026	0.8211	0.7571	0.8603	0.8189	0.0974
	3555			N-acetyl-beta-alanine	LC/MS polar	37432	C01073		76406		0.61	0.98	1.26	1.61	2.07	1.28	0.9	0.54	1.26	0.6	1.41	2.35	1.48	2.17	0.81	1.48					0.095	0.064	0.7084	0.4515	0.7108	0.8871	0.19	0.0949	0.0436	0.0272	0.4576	0.7775	0.4844	0.6496	0.2131	0.5696	0.813	0.8152	0.579
	3557			uridine 2'-monophosphate (2'-UMP)*	LC/MS neg	52444					0.83	0.13	1.81	0.16	2.19	13.67	8.79	0.56	1.71	0.06	0.19	3.07	1.13	11.97	4.74	1.06					0.1182	0.0734	0.0136	0.1058	0.5209	0.8729	0.3306	0.1483	0.3483	0.1371	0.0602	0.7068	0.548	0.6611	0.495	0.6828	0.6627	0.798	0.2029
	3559		Pyrimidine Metabolism, Cytidine containing	cytidine diphosphate	LC/MS neg	2841	C00112	HMDB01546	6132		1.09	1.96	1.14	1.8	1.04	0.58	1.62	1.9	2.26	1.17	1.39	1.19	1.06	1.57	1.02	2.1					0.9207	0.3232	0.2152	0.2674	0.7469	0.8871	0.2533	0.1202	0.8233	0.264	0.3558	0.7603	0.3756	0.6315	0.5266	0.6828	0.1501	0.5937	0.7983
	3560			cytidine 5'-monophosphate (5'-CMP)	LC/MS pos early	2372	C00055	HMDB00095	6131		2.75	0.86	1	0.31	0.36	1.16	1.15	1.11	0.92	0.97	0.81	0.83	1.38	0.57	1.78	1.28					0.003	0.0047	0.6928	0.4482	0.9116	0.9027	0.001	0.0012	0.0022	0.0029	0.7762	0.8554	0.8585	0.7201	0.6594	0.7054	0.8468	0.8189	0.7927
	3561			cytidine 3'-monophosphate (3'-CMP)	LC/MS polar	2959	C05822		66535		1.35	1.13	2.04	0.83	1.51	1.81	3.68	0.54	1.16	0.15	0.31	2.15	1.41	3.84	0.68	0.8					0.8524	0.3059	0.9806	0.5249	0.6534	0.8871	0.8334	0.283	0.526	0.1882	0.6709	0.8461	0.6026	0.6636	0.3021	0.6213	0.5638	0.7773	0.1242
	3563			cytidine 2',3'-cyclic monophosphate	LC/MS neg	37465	C02354	HMDB11691	417654		0.66	0.43	1.31	0.66	2	3.04	9.54	0.48	1.58	0.05	0.17	3.28	0.8	11.68	0.9	0.97					0.785	0.2909	0.1826	0.2515	0.8757	0.9027	0.2858	0.132	0.668	0.223	0.1379	0.7378	0.6508	0.6738	0.1205	0.5032	0.7745	0.8134	0.0477
	3564			cytidine	LC/MS pos early	514	C00475	HMDB00089	6175		0.57	0.66	1.01	1.15	1.77	1.54	1.51	1.09	1.31	0.72	0.87	1.2	0.85	2.24	1.4	1.09					0.0118	0.0125	0.3097	0.3082	0.8287	0.8989	0.1154	0.0621	0.0201	0.0158	0.422	0.7603	0.6064	0.6636	0.9126	0.7741	0.4825	0.7737	0.6848
	3565			cytosine	LC/MS pos early	573	C00380	HMDB00630	597		1.61	0.92	1.13	0.57	0.71	1.23	0.63	0.93	0.74	1.47	1.18	0.8	1.26	0.5	1.27	0.83					0.1217	0.0746	0.7688	0.4595	0.7927	0.8924	0.0678	0.0405	0.1954	0.0882	0.5783	0.8385	0.0613	0.37	0.5122	0.6828	0.227	0.6744	0.2135
	3566			3-methylcytidine	LC/MS pos early	35132			159649		1.25	0.2	0.56	0.16	0.45	2.74	0.79	0.78	0.83	0.98	1.05	1.07	1.08	0.68	4.1	1.6					0.1677	0.0953	0.006	0.0796	0.2453	0.8454	0.0001	0.0002	0.0135	0.0116	0.0931	0.7308	0.5042	0.6496	0.3474	0.6484	0.6258	0.7912	0.7834
	3567			5-methylcytidine	LC/MS pos early	22119		HMDB00982	92918		0.98	0.61	1.06	0.62	1.08	1.73	1.78	1.02	1.06	0.58	0.6	1.03	1.11	2.02	1.87	1.11					0.5353	0.2192	0.5177	0.3851	0.8843	0.9027	0.9783	0.3167	0.6347	0.216	0.6155	0.8453	0.4688	0.6496	0.9119	0.7741	0.9064	0.8244	0.4044
	3568			N4-acetylcytidine	LC/MS pos early	35130		HMDB05923	107461		0.78	0.3	0.37	0.38	0.48	1.24	0.68	0.72	0.52	1.05	0.76	0.72	1.01	0.88	2.41	1.4					0.4174	0.1832	0.1143	0.2165	0.1415	0.7336	0.0195	0.014	0.0256	0.0186	0.9095	0.8647	0.4607	0.6496	0.5215	0.6828	0.1105	0.4942	0.9224
	3572			2'-deoxycytidine 5'-monophosphate	LC/MS pos early	533	C00239	HMDB01202	13945		1.23	0.67	0.77	0.55	0.62	1.14	0.94	0.95	0.75	1.02	0.8	0.79	1.53	1.16	2.15	1.49					0.3371	0.1575	0.2531	0.2813	0.7298	0.8871	0.0393	0.0255	0.1945	0.088	0.4217	0.7603	0.8115	0.7084	0.9661	0.7873	0.5681	0.7773	0.8445
	3574			2'-deoxycytidine	LC/MS neg	15949	C00881	HMDB00014	13711		0.42	0.48	0.84	1.14	1.98	1.74	0.96	0.5	0.65	0.52	0.67	1.28	1.17	2.66	1.22	0.9					0.0035	0.0052	0.1625	0.2439	0.7433	0.8871	0.0996	0.0551	0.0083	0.0077	0.2809	0.7603	0.5834	0.6632	0.2393	0.584	0.5963	0.783	0.5247
	3575			2'-O-methylcytidine	LC/MS pos early	57554			150971		3.31	1.05	2.47	0.32	0.75	2.36	2.23	1.39	1.09	0.63	0.49	0.79	1.8	1.21	2.39	0.8					0.0018	0.0035	0.7675	0.4595	0.1882	0.8271	0.0042	0.004	0.0528	0.0316	0.304	0.7603	0.2146	0.5472	0.428	0.6652	0.9547	0.8367	0.6478
	3576			5-methyl-2'-deoxycytidine	LC/MS pos early	38159	C03592	HMDB02224	440055		0.82	0.29	0.6	0.36	0.73	2.04	0.85	0.48	0.44	0.57	0.51	0.91	1.2	1.24	1.97	0.88					0.953	0.3297	0.0063	0.0796	0.2292	0.8454	0.0074	0.0065	0.2523	0.1064	0.1042	0.7342	0.7632	0.6975	0.1048	0.4935	0.089	0.4637	0.1826
	3579			cytidine 2'-monophosphate (2'-CMP)	LC/MS polar	57769					1.17	0.59	2.22	0.51	1.89	3.73	6.51	0.51	1.95	0.08	0.3	3.86	1.23	6.82	1.05	1.08					0.6217	0.2443	0.3592	0.3291	0.9527	0.9027	0.6693	0.2433	0.6641	0.2226	0.3907	0.7603	0.5846	0.6632	0.3782	0.6652	0.5228	0.7737	0.157
	3585		Pyrimidine Metabolism, Thymine containing	thymidine	LC/MS neg	2183	C00214	HMDB00273	5789		0.39	0.46	0.79	1.16	2	1.72	1.3	1.37	0.9	1.05	0.69	0.66	0.79	2.61	2.36	0.9					0.0012	0.0026	0.1837	0.2515	0.6387	0.8871	0.0386	0.0252	0.0044	0.0048	0.3844	0.7603	0.9834	0.7488	0.6824	0.7066	0.9617	0.8404	0.6977
	3586			thymine	LC/MS neg	604	C00178	HMDB00262	1135		0.43	0.26	0.34	0.61	0.78	1.29	0.48	1.28	0.34	2.67	0.71	0.26	1.55	1.71	7.54	1.55					0.0703	0.0501	0.0344	0.1516	0.0572	0.5877	0.7431	0.2616	0.9223	0.2871	0.8178	0.8554	0.2312	0.5472	0.5548	0.6897	0.0807	0.461	0.0776
	3587			5,6-dihydrothymine	LC/MS neg	1418	C00906	HMDB00079	93556		1.07	0.61	0.6	0.57	0.57	0.99	0.49	0.58	0.43	1.2	0.89	0.74	1.68	0.77	1.62	1.21					0.8287	0.3019	0.3876	0.3405	0.2877	0.8454	0.5158	0.2041	0.3951	0.1511	0.8393	0.8554	0.0228	0.2502	0.0961	0.4794	0.0376	0.3344	0.5106
	3589			3-aminoisobutyrate	LC/MS pos early	1566	C05145	HMDB03911	64956		7.71	0.75	0.59	0.1	0.08	0.79	3.57	0.45	0.73	0.13	0.2	1.61	1.37	0.64	0.83	1.69					0.0005	0.0014	0.476	0.3726	0.4041	0.8649	5.7302e-05	0.0001	3.8899e-05	0.0001	0.9021	0.8627	0.5858	0.6632	0.0524	0.3894	0.5871	0.7812	0.0147
	3590		Purine and Pyrimidine Metabolism	methylphosphate	LC/MS neg	37070		HMDB61711	13130		1.53	0.63	0.74	0.41	0.48	1.17	1.21	0.69	1.11	0.57	0.91	1.6	0.78	0.62	0.85	1.16					0.099	0.0658	0.4772	0.3726	0.2485	0.8454	0.0208	0.0148	0.0067	0.0067	0.6526	0.8461	0.4403	0.6493	0.4996	0.6828	0.669	0.798	0.1519
	3592		Dinucleotide	(3'-5')-adenylylcytidine	LC/MS neg	52753			10875494		0.63	0.53	1.52	0.84	2.41	2.88	2.83	0.65	1.21	0.23	0.43	1.85	0.69	3.09	0.86	0.55					0.597	0.2378	0.4941	0.3778	0.9212	0.9027	0.8759	0.2918	0.667	0.223	0.5581	0.8385	0.6579	0.6741	0.2971	0.6166	0.7139	0.8003	0.1408
	3593			(3'-5')-adenylylguanosine*	LC/MS neg	62760			444337		0.52	0.58	0.74	1.12	1.44	1.29	1.24	0.8	1.63	0.64	1.32	2.05	0.55	1.33	0.77	1.22					0.2269	0.1197	0.2525	0.2813	0.4189	0.8649	0.9475	0.3099	0.6837	0.2256	0.7325	0.851	0.9016	0.7324	0.5278	0.6828	0.2028	0.6623	0.451
	3594			(3'-5')-adenylyluridine	LC/MS neg	52740			112074		0.51	0.48	1.26	0.94	2.48	2.65	1.55	0.6	1.25	0.38	0.81	2.11	0.67	2.05	0.84	0.67					0.2767	0.1379	0.2377	0.2756	0.8485	0.8989	0.9241	0.3035	0.368	0.143	0.3203	0.7603	0.9634	0.7458	0.1431	0.5255	0.7529	0.8056	0.1556
	3595			(3'-5')-adenylyladenosine*	LC/MS neg	62396			94231		0.56	0.58	0.66	1.03	1.18	1.14	1.5	0.72	1.85	0.48	1.23	2.56	0.55	1.49	0.69	1.56					0.3662	0.167	0.2825	0.292	0.4863	0.8649	0.8616	0.2888	0.8338	0.2669	0.7011	0.8461	0.9604	0.7458	0.2317	0.5781	0.2273	0.6744	0.2133
	3599			(3'-5')-cytidylyluridine*	LC/MS neg	62399					0.13	0.09	0.69	0.71	5.23	7.31	1.21	0.64	0.86	0.53	0.71	1.34	0.44	4.02	3	0.55					0.0418	0.0329	0.0122	0.103	0.4323	0.8649	0.6042	0.2256	0.1977	0.0885	0.0743	0.7068	0.6876	0.6786	0.451	0.6723	0.7196	0.8003	0.2504
	3601			(3'-5')-guanylylcytidine	LC/MS neg	52746			107595		0.57	0.58	1.88	1.02	3.3	3.23	2.21	0.61	1.02	0.27	0.46	1.68	0.8	3.13	0.84	0.44					0.1651	0.0944	0.4674	0.3715	0.9713	0.9106	0.5003	0.1996	0.1548	0.0748	0.4459	0.7742	0.9756	0.7479	0.2806	0.6103	0.7227	0.8003	0.2674
	3602			(3'-5')-guanylyluridine	LC/MS neg	52743					0.41	0.47	2.45	1.16	5.99	5.17	2.16	0.57	1.41	0.26	0.65	2.48	0.63	3.3	0.75	0.36					0.0885	0.0613	0.3339	0.3149	0.7836	0.8883	0.4469	0.1861	0.0498	0.0302	0.2169	0.7603	0.9304	0.7402	0.2862	0.6103	0.5566	0.7773	0.3267
	3603			(3'-5')-uridylylcytidine*	LC/MS neg	62398					0.72	0.85	1.02	1.18	1.42	1.2	0.81	0.71	1.08	0.88	1.33	1.52	0.89	1.01	0.75	0.95					0.1967	0.1061	0.7012	0.4498	0.7004	0.8871	0.3598	0.1574	0.3603	0.1415	0.9991	0.8797	0.5044	0.6496	0.2273	0.5781	0.7058	0.798	0.5837
	3605			(3'-5')-uridylyluridine	LC/MS neg	52741			102258		0.63	0.55	0.97	0.87	1.54	1.77	0.86	0.6	1.03	0.7	1.2	1.73	0.72	0.99	0.79	0.77					0.49	0.2068	0.4149	0.3545	0.7194	0.8871	0.8995	0.2976	0.7394	0.2398	0.6465	0.8461	0.7244	0.6877	0.1286	0.5032	0.8153	0.8152	0.2385
	3607	Cofactors and Vitamins	Nicotinate and Nicotinamide Metabolism	quinolinate	LC/MS pos early	1899	C03722	HMDB00232	1066		1.29	0.27	0.46	0.21	0.35	1.68	0.62	0.82	0.68	1.33	1.1	0.83	1.52	0.72	4.57	2.25					0.3601	0.165	0.0047	0.0736	0.0285	0.4924	0.0003	0.0005	0.0027	0.0033	0.4743	0.795	0.1254	0.4772	0.7487	0.7358	0.3636	0.7458	0.2212
	3611			nicotinamide	LC/MS pos early	594	C00153	HMDB01406	936		5.82	0.86	0.85	0.15	0.15	0.98	1.91	1.15	0.91	0.6	0.48	0.79	1.02	0.33	1.36	1.1					1.8865e-06	9.0558e-05	0.6048	0.4168	0.4939	0.8649	3.4903e-07	1.711e-05	2.0206e-07	1.7572e-05	0.8668	0.8554	0.098	0.4653	0.638	0.7037	0.701	0.798	0.2296
	3613			nicotinamide ribonucleotide (NMN)	LC/MS pos early	22152	C00455	HMDB00229	14180		3.58	1.75	2.62	0.49	0.73	1.5	0.95	0.95	1.26	0.99	1.33	1.33	1.46	0.39	0.79	0.71					0.0041	0.006	0.202	0.2609	0.1404	0.7336	0.0876	0.05	0.1304	0.0649	0.8371	0.8554	0.5247	0.659	0.7129	0.7212	0.6673	0.798	0.7876
	3614			nicotinamide riboside	LC/MS pos early	33013	C03150	HMDB00855	439924		2.81	0.83	0.97	0.29	0.35	1.18	1.04	1.24	1.04	1.19	1	0.84	0.85	0.31	1.27	0.9					0.002	0.0035	0.6757	0.441	0.9835	0.9127	0.0006	0.0008	0.0018	0.0024	0.6909	0.8461	0.9957	0.7488	0.5346	0.6828	0.7876	0.8134	0.5381
	3615			nicotinamide adenine dinucleotide (NAD+)	LC/MS neg	5278	C00003	HMDB00902	5893		3.4	2.48	1.97	0.73	0.58	0.79	1.44	0.73	1.22	0.51	0.85	1.66	1.33	0.56	0.39	0.82					0.0175	0.0169	0.1375	0.2354	0.6971	0.8871	0.3414	0.1512	0.0434	0.0271	0.2679	0.7603	0.5484	0.6611	0.6285	0.7037	0.9625	0.8404	0.281
	3616			nicotinamide adenine dinucleotide reduced (NADH)	LC/MS neg	31475	C00004	HMDB01487	439153		3.65	3.31	1.36	0.91	0.37	0.41	1.35	0.57	0.94	0.42	0.69	1.64	1.49	0.55	0.26	1.03					0.0293	0.0249	0.1526	0.2439	0.6405	0.8871	0.4271	0.1797	0.081	0.0441	0.3293	0.7603	0.7224	0.6877	0.6464	0.7038	0.9796	0.8429	0.417
	3623			1-methylnicotinamide	LC/MS pos early	27665	C02918	HMDB00699	10129985		1.32	0.73	0.67	0.55	0.5	0.91	0.79	1.25	0.87	1.59	1.11	0.69	1.49	0.88	2.55	1.94					0.599	0.2381	0.2691	0.2903	0.1462	0.743	0.1066	0.0586	0.051	0.0307	0.7199	0.851	0.4071	0.6315	0.3695	0.659	0.7953	0.8134	0.0886
	3628			trigonelline (N'-methylnicotinate)	LC/MS pos early	32401	C01004	HMDB00875	5570		10.92	1.63	1.43	0.15	0.13	0.88	4.43	6.03	1.15	1.36	0.26	0.19	0.22	0.09	0.82	0.18					7.6624e-06	0.0001	0.0405	0.1576	0.1054	0.6884	0.0044	0.0042	0.0012	0.0018	0.6477	0.8461	0.0033	0.1215	0.0014	0.1161	0.8479	0.8189	0.7627
	3630			N1-Methyl-2-pyridone-5-carboxamide	LC/MS pos early	40469	C05842	HMDB04193	69698		2.04	0.83	1	0.41	0.49	1.21	0.82	0.52	0.78	0.63	0.95	1.5	2.54	1.02	1.58	1.97					0.0183	0.0174	0.4831	0.3738	0.9536	0.9027	0.0029	0.003	0.0211	0.0162	0.4478	0.7742	0.7596	0.6975	0.1256	0.5032	0.6663	0.798	0.2163
	3631			N1-Methyl-4-pyridone-3-carboxamide	LC/MS pos early	57584	C05843	HMDB04194	440810		3.35	0.73	0.86	0.22	0.26	1.17	0.91	0.53	0.78	0.58	0.86	1.46	2.63	0.72	1.92	2.4					0.0002	0.0009	0.2008	0.2609	0.6393	0.8871	3.6491e-06	4.6029e-05	5.0799e-05	0.0002	0.4123	0.7603	0.5657	0.6611	0.0543	0.3894	0.344	0.745	0.1683
	3632			adenosine 5'-diphosphoribose (ADP-ribose)	LC/MS neg	558	C00301	HMDB01178	192		59.56	1.72	3.21	0.03	0.05	1.86	1.58	0.05	0.12	0.03	0.08	2.52	5.6	0.15	0.16	0.22					0.0015	0.0031	0.5439	0.3931	0.1648	0.7757	0.008	0.007	0.0534	0.0317	0.4268	0.7645	0.8391	0.716	0.0245	0.2939	0.0997	0.4685	0.0391
	3635		Riboflavin Metabolism	riboflavin (Vitamin B2)	LC/MS pos early	1827	C00255	HMDB00244	493570		3.14	0.46	0.67	0.15	0.22	1.47	1.47	0.94	0.7	0.64	0.48	0.75	1.26	0.59	2.56	1.3					0.001	0.0022	0.0431	0.1585	0.2157	0.8337	1.4284e-06	3.2197e-05	2.0547e-05	9.8181e-05	0.4105	0.7603	0.1523	0.5026	0.5942	0.6982	0.7066	0.798	0.362
	3636			flavin adenine dinucleotide (FAD)	LC/MS neg	2134	C00016	HMDB01248	643975		5.06	0.92	0.87	0.18	0.17	0.94	2.17	1.04	1.13	0.48	0.52	1.09	0.96	0.41	1.09	1.26					1.4225e-05	0.0002	0.7643	0.4595	0.4649	0.8649	5.4205e-06	4.662e-05	1.33e-06	3.5255e-05	0.6652	0.8461	0.0613	0.37	0.9908	0.7897	0.6878	0.798	0.0628
	3637			flavin mononucleotide (FMN)	LC/MS neg	15797	C00061	HMDB01520	710		2.52	0.59	0.63	0.23	0.25	1.07	2.2	1.23	2	0.56	0.91	1.62	0.64	0.56	1.35	2.05					0.0121	0.0127	0.2809	0.292	0.1132	0.6884	0.0006	0.0009	0.0001	0.0003	0.6015	0.8385	0.1112	0.4657	0.6162	0.7037	0.0671	0.43	0.2678
	3638		Pantothenate and CoA Metabolism	pantothenate	LC/MS neg	1508	C00864	HMDB00210	6613		1.03	1.18	0.91	1.15	0.88	0.77	0.8	0.9	0.77	1.12	0.96	0.86	0.91	0.71	0.69	0.77					0.8044	0.2947	0.4617	0.3679	0.2694	0.8454	0.6241	0.2311	0.1785	0.0832	0.0698	0.7068	0.3793	0.6315	0.741	0.7313	0.2556	0.7007	0.5812
	3640			phosphopantetheine	LC/MS neg	15504	C01134	HMDB01416	987		17.85	1.26	0.76	0.07	0.04	0.6	6.63	1.76	1.13	0.27	0.17	0.64	1.04	0.39	1.45	1.55					0.0003	0.001	0.6228	0.4252	0.4332	0.8649	0.0013	0.0015	2.6379e-05	0.0001	0.2053	0.7603	0.0508	0.347	0.4913	0.6828	0.8376	0.8189	0.1948
	3641			3'-dephosphocoenzyme A	LC/MS neg	18289	C00882	HMDB01373	444485		49.1	1.49	0.63	0.03	0.01	0.42	12.34	1.87	2.4	0.15	0.19	1.29	0.91	0.23	1.14	3.48					3.6542e-05	0.0003	0.2405	0.2756	0.9953	0.9187	0.0013	0.0015	3.7231e-05	0.0001	0.2428	0.7603	0.0783	0.424	0.4047	0.6652	0.8576	0.8189	0.3404
	3642			3'-dephospho-acetyl-CoA	LC/MS neg	54675			193680		1.5	1.02	0.84	0.68	0.56	0.83	1.34	0.99	1.4	0.74	1.05	1.4	0.63	0.56	0.61	1.03					0.0829	0.0581	0.4206	0.3556	0.948	0.9027	0.3403	0.1512	0.0725	0.0401	0.3844	0.7603	0.4712	0.6496	0.9855	0.7897	0.7648	0.8101	0.4602
	3643			coenzyme A	LC/MS neg	46322	C00010	HMDB01423	317		25.82	1.32	0.99	0.05	0.04	0.75	5.72	2.4	3.55	0.42	0.62	1.48	0.61	0.13	1.11	2.18					5.1259e-05	0.0003	0.3998	0.3486	0.8472	0.8989	0.0007	0.0009	2.7881e-05	0.0001	0.3023	0.7603	0.0935	0.4538	0.2926	0.6103	0.4771	0.7737	0.5182
	3645			pantetheine	LC/MS neg	57555	C00831		439322		4.92	0.97	1.59	0.2	0.32	1.63	5.54	1.06	1.55	0.19	0.28	1.46	0.95	1.07	1.04	0.93					0.017	0.0169	0.6597	0.4378	0.5515	0.8871	0.0474	0.0301	0.0662	0.0377	0.8761	0.8554	0.1207	0.4772	0.9664	0.7873	0.7507	0.8056	0.1113
	3649		Ascorbate and Aldarate Metabolism	ascorbate (Vitamin C)	LC/MS pos early	32354	C00072	HMDB00044			1.3	0.71	0.82	0.55	0.63	1.15	1.78	1.49	1.32	0.84	0.74	0.88	0.9	1.24	1.89	1.45					0.3744	0.17	0.6341	0.429	0.7859	0.8883	0.1759	0.0896	0.2482	0.105	0.8377	0.8554	0.028	0.2854	0.1983	0.563	0.0847	0.4637	0.3366
	3650			dehydroascorbate	LC/MS neg	34302	C05422	HMDB01264	835		1.07	0.54	0.33	0.51	0.31	0.61	0.9	0.79	0.26	0.88	0.29	0.33	1.73	1.45	2.53	1.37					0.7087	0.27	0.0459	0.1585	0.0001	0.0301	0.0194	0.014	3.6064e-05	0.0001	0.0328	0.6757	0.4307	0.6452	0.4256	0.6652	0.0002	0.0199	0.9929
	3651			threonate	LC/MS polar	27738	C01620	HMDB00943	151152		1.45	0.64	0.99	0.44	0.68	1.54	0.42	0.67	0.32	1.61	0.76	0.47	2.13	0.62	2.23	0.69					0.2981	0.1449	0.1533	0.2439	0.8715	0.9027	0.0162	0.0121	0.2307	0.0986	0.2035	0.7603	0.0481	0.347	0.1719	0.5607	0.011	0.1799	0.5207
	3654			oxalate (ethanedioate)	LC/MS neg	20694	C00209	HMDB02329	971		0.63	0.69	1.45	1.1	2.31	2.11	0.58	0.91	0.72	1.55	1.24	0.8	1.2	1.11	1.57	0.6					0.1435	0.0846	0.2669	0.2903	0.4556	0.8649	0.716	0.2552	0.0303	0.0208	0.0675	0.7068	0.075	0.4169	0.5248	0.6828	0.4036	0.7458	0.2424
	3655			gulonate*	LC/MS polar	46957	C00257	HMDB03290	9794176		7.46	0.34	1.15	0.05	0.15	3.34	3.93	3.23	0.7	0.82	0.18	0.22	1.09	0.57	10.18	0.66					0.0063	0.0081	0.1708	0.2463	0.826	0.8989	0.0001	0.0002	0.0035	0.0041	0.2476	0.7603	0.654	0.6738	0.3744	0.6626	0.5837	0.7812	0.6575
	3657		Tocopherol Metabolism	alpha-tocopherol	LC/MS pos late	1561	C02477	HMDB01893	14985		2.64	0.67	1.08	0.26	0.41	1.6	2.1	1.31	1.07	0.63	0.51	0.82	0.9	0.71	1.75	0.89					0.0099	0.0114	0.2623	0.2903	0.9231	0.9027	0.0004	0.0006	0.0077	0.0074	0.3046	0.7603	0.0085	0.1823	0.2111	0.5696	0.3714	0.7458	0.1419
	3679			gamma-tocopherol/beta-tocopherol	LC/MS pos late	52473					1.89	0.81	0.75	0.43	0.39	0.92	1.53	1.09	0.52	0.71	0.34	0.48	3.33	2.7	4.49	2.33					0.092	0.0629	0.3526	0.3268	0.3092	0.8454	0.011	0.009	0.0088	0.0081	0.9292	0.8666	0.4831	0.6496	0.9178	0.7741	0.0873	0.4637	0.4217
	3685		Folate Metabolism	5-methyltetrahydrofolate (5MeTHF)	LC/MS neg	18330	C00440	HMDB01396	146		4	1.12	1.74	0.28	0.43	1.55	4.71	1.32	1.56	0.28	0.33	1.18	1.19	1.4	1.4	1.06					0.0022	0.0039	0.7401	0.4558	0.2702	0.8454	0.0055	0.0051	0.0376	0.0244	0.4377	0.7742	0.0019	0.0874	0.563	0.6897	0.3733	0.7458	0.0089
	3687		Tetrahydrobiopterin Metabolism	dihydrobiopterin	LC/MS pos early	35129	C00268	HMDB00038	1879		7.77	0.83	0.66	0.11	0.08	0.79	2.24	0.9	0.88	0.4	0.39	0.98	1.31	0.38	1.41	1.75					0.0003	0.001	0.4888	0.3755	0.4133	0.8649	3.099e-05	0.0001	2.0681e-05	9.8181e-05	0.8987	0.8611	0.1242	0.4772	0.981	0.7894	0.8214	0.8152	0.1187
	3690		Pterin Metabolism	pterin	LC/MS pos early	43023	C00715	HMDB00802	73000		11.77	0.81	0.82	0.07	0.07	1.01	2.06	0.93	1.01	0.45	0.49	1.08	1.04	0.18	1.19	1.28					0.0001	0.0006	0.6024	0.4161	0.7131	0.8871	2.2047e-05	9.2455e-05	3.591e-05	0.0001	0.8778	0.8554	0.4821	0.6496	0.6423	0.7037	0.9758	0.8427	0.2459
	3701		Hemoglobin and Porphyrin Metabolism	heme	LC/MS pos late	41754	C00032	HMDB03178	26945		0.58	0.78	0.81	1.34	1.38	1.03	0.2	0.78	0.46	3.86	2.28	0.59	1.39	0.48	1.38	0.79					0.7302	0.2749	0.7287	0.4541	0.9257	0.9027	0.9984	0.3203	0.6615	0.2222	0.6601	0.8461	0.0089	0.1823	0.923	0.7741	0.6188	0.7901	0.0069
	3702			bilirubin (Z,Z)	LC/MS pos late	43807	C00486	HMDB00054	5280352		0.11	0.1	0.29	0.91	2.56	2.82	0.22	0.37	0.21	1.68	0.98	0.58	0.7	1.37	2.53	0.52					0.0678	0.0487	0.0243	0.1358	0.4098	0.8649	0.646	0.2363	0.3025	0.1236	0.1396	0.7378	0.3992	0.6315	0.8817	0.7665	0.4017	0.7458	0.4864
	3705			biliverdin	LC/MS neg	2137	C00500	HMDB01008	5353439		0.19	0.13	0.32	0.7	1.66	2.39	0.13	0.45	0.12	3.53	0.94	0.27	1.52	0.99	5.05	0.56					0.0945	0.0639	0.0162	0.1168	0.2464	0.8454	0.4296	0.1797	0.5948	0.2067	0.1897	0.7603	0.0021	0.0907	0.0221	0.2939	0.0011	0.0453	0.3733
	3714		Thiamine Metabolism	thiamin (Vitamin B1)	LC/MS pos early	5341	C00378	HMDB00235	1130		8.45	0.74	0.91	0.09	0.11	1.23	3.95	1.69	1.68	0.43	0.43	1	0.76	0.35	1.72	1.4					2.421e-05	0.0003	0.8139	0.47	0.9224	0.9027	1.141e-05	7.9131e-05	1.7748e-05	9.7114e-05	0.8902	0.858	0.0104	0.1823	0.1906	0.5607	0.3826	0.7458	0.1817
	3715			thiamin monophosphate	LC/MS pos early	15798	C01081	HMDB02666	3382778		6.14	0.85	0.86	0.14	0.14	1.02	2.72	1.23	1.56	0.45	0.57	1.26	0.9	0.4	1.3	1.62					7.2072e-06	0.0001	0.9415	0.5145	0.9434	0.9027	5.6879e-06	4.662e-05	5.7323e-06	7.4798e-05	0.9981	0.8797	0.0095	0.1823	0.5	0.6828	0.2448	0.6992	0.0474
	3716			thiamin diphosphate	LC/MS neg	35670	C00068	HMDB01372	1132		5.71	0.77	0.88	0.14	0.15	1.14	1.53	1	0.99	0.65	0.65	1	1.08	0.29	1.4	1.23					9.5447e-05	0.0005	0.7982	0.4645	0.5326	0.8784	4.2863e-05	0.0001	1.3225e-05	8.9735e-05	0.7118	0.85	0.2475	0.5474	0.7743	0.744	0.7716	0.8129	0.3815
	3722		Vitamin A Metabolism	retinol (Vitamin A)	LC/MS pos late	1806	C00473	HMDB00305	445354		36.1	0.67	0.61	0.02	0.02	0.91	13.84	1.27	0.91	0.09	0.07	0.72	0.83	0.32	1.55	1.22					0.0002	0.0007	0.6154	0.4231	0.4998	0.8655	3.4158e-05	0.0001	1.9675e-05	9.8181e-05	0.8622	0.8554	0.176	0.5138	0.5615	0.6897	0.882	0.8189	0.433
	3738		Vitamin B6 Metabolism	pyridoxamine	LC/MS pos early	2150	C00534	HMDB01431	1052		2.89	0.77	1.42	0.27	0.49	1.84	2.63	0.85	1.26	0.33	0.48	1.47	0.85	0.78	0.95	0.76					0.0057	0.0076	0.9097	0.5036	0.5098	0.8687	0.0042	0.004	0.0297	0.0205	0.4404	0.7742	0.1133	0.4657	0.7415	0.7313	0.6761	0.798	0.0581
	3739			pyridoxamine phosphate	LC/MS pos early	3138	C00647	HMDB01555	1053		12.59	1.02	0.77	0.08	0.06	0.75	4.11	1.28	1.23	0.31	0.3	0.95	1.03	0.34	1.29	1.64					7.617e-05	0.0004	0.7704	0.4595	0.482	0.8649	0.0002	0.0003	8.1106e-06	8.9735e-05	0.3216	0.7603	0.0668	0.3866	0.935	0.7764	0.8018	0.8149	0.079
	3741			pyridoxal	LC/MS pos early	1651	C00250	HMDB01545	1050		2.4	1.03	1.79	0.43	0.75	1.74	1.33	0.91	1.12	0.68	0.84	1.24	0.95	0.53	0.84	0.59					0.0033	0.0051	0.2414	0.2756	0.0506	0.5877	0.0603	0.0365	0.275	0.1138	0.4133	0.7603	0.6201	0.6716	0.7884	0.7467	0.767	0.8101	0.446
	3742			pyridoxate	LC/MS neg	31555	C00847	HMDB00017	6723		5.61	1.66	1.32	0.3	0.23	0.79	1.77	0.92	0.52	0.52	0.29	0.56	0.81	0.26	0.45	0.32					0.0002	0.0007	0.1554	0.2439	0.4217	0.8649	0.0093	0.0079	0.0017	0.0023	0.5283	0.8193	0.8623	0.7201	0.5048	0.6828	0.0998	0.4685	0.4017
	3744	Xenobiotics	Benzoate Metabolism	hippurate	LC/MS neg	15753	C01586	HMDB00714	464		1.34	3.05	2.9	2.28	2.17	0.95	1.88	2.73	0.9	1.45	0.48	0.33	0.52	0.73	0.46	0.16					0.2419	0.1259	0.0023	0.0621	0.0036	0.2321	0.0452	0.0289	0.0637	0.0364	0.8736	0.8554	0.1519	0.5026	0.0878	0.459	0.5231	0.7737	0.774
	3758			benzoate	LC/MS neg	15778	C00180	HMDB01870	243		0.88	0.87	0.95	0.99	1.08	1.1	0.95	0.72	1.78	0.76	1.86	2.45	0.76	0.82	0.63	1.42					0.2407	0.1256	0.7915	0.463	0.8522	0.9006	0.3606	0.1574	0.1757	0.0822	0.6526	0.8461	0.905	0.7338	0.3191	0.6293	0.1848	0.6487	0.3795
	3776			catechol sulfate	LC/MS neg	35320		HMDB59724	3083879		0.46	1.98	1.42	4.3	3.08	0.71	2.34	2.62	1.39	1.12	0.59	0.53	0.26	1.32	0.34	0.25					0.2918	0.1426	0.0381	0.1548	0.3316	0.8454	0.0026	0.0027	0.0469	0.0287	0.252	0.7603	0.1436	0.4971	0.1885	0.5607	0.5983	0.783	0.8783
	3795			4-vinylphenol sulfate	LC/MS neg	36098	C05627	HMDB62775	6426766		1.5	0.97	0.79	0.65	0.53	0.82	0.97	0.55	1.6	0.57	1.66	2.9	0.81	0.52	0.46	1.64					0.1437	0.0846	0.8219	0.4709	0.9105	0.9027	0.0936	0.0521	0.1758	0.0822	0.7358	0.851	0.8096	0.7084	0.1068	0.4943	0.381	0.7458	0.1671
	3816			p-cresol sulfate	LC/MS neg	36103		HMDB11635	4615423		0.4	0.33	0.47	0.83	1.17	1.41	0.34	0.34	0.5	1.01	1.49	1.48	1.05	0.88	1.07	1.12					0.0887	0.0613	0.0079	0.0903	0.0914	0.6574	0.3	0.1373	0.988	0.2993	0.2932	0.7603	0.0074	0.1823	0.0162	0.2763	0.1483	0.5937	0.7564
	3827			3-(3-hydroxyphenyl)propionate sulfate	LC/MS neg	45415			187488		2.05	4.97	4.8	2.42	2.34	0.97	6	1.61	2.63	0.27	0.44	1.63	0.61	1.78	0.2	0.33					0.3159	0.1505	0.0048	0.0736	0.0015	0.2089	0.0561	0.0344	0.0209	0.0162	0.6648	0.8461	0.0486	0.347	0.4294	0.6652	0.1452	0.5934	0.2236
	3832			3-phenylpropionate (hydrocinnamate)	LC/MS neg	15749	C05629	HMDB00764	107		0.83	4	1.58	4.83	1.9	0.39	1.03	1.07	1	1.03	0.97	0.94	0.65	0.81	0.17	0.41					0.4479	0.192	9.5654e-08	2.8279e-05	0.1061	0.6884	8.1612e-09	1.0318e-06	0.0202	0.0158	1.9652e-05	0.0097	0.8913	0.7311	0.7947	0.7479	1	0.8436	0.9016
	3962		Food Component/Plant	2-oxindole-3-acetate	LC/MS neg	40479		HMDB35514	3080590		3.43	3.36	1.66	0.98	0.48	0.49	1.24	1.25	1	1.01	0.81	0.8	0.71	0.26	0.26	0.43					0.0007	0.0017	0.0064	0.0796	0.2093	0.8337	0.4263	0.1797	0.0209	0.0162	0.1172	0.7378	0.6413	0.6738	0.6092	0.7037	1	0.8436	0.9638
	3974			3-hydroxyindolin-2-one	LC/MS pos early	42561	C11130		6097		0.62	0.35	0.33	0.57	0.54	0.94	0.78	0.4	0.46	0.52	0.6	1.15	0.57	0.72	0.64	0.79					0.2623	0.1344	0.0231	0.1342	0.027	0.4924	0.2278	0.1104	0.2536	0.1065	0.9474	0.8683	0.5099	0.6502	0.1188	0.5032	0.1198	0.5213	0.3584
	3987			gluconate	LC/MS polar	587	C00257	HMDB00625	10690		1.88	0.27	0.87	0.14	0.46	3.21	1.02	0.48	0.97	0.47	0.95	2.02	0.73	0.39	1.29	0.81					0.0987	0.0658	0.059	0.1714	0.7663	0.8871	0.0008	0.001	0.0535	0.0317	0.108	0.7342	0.7501	0.6963	0.0726	0.4299	0.9272	0.8267	0.1356
	4053			galacturonate 1-phosphate	LC/MS neg	38588	C04037		440203		0.54	0.62	0.57	1.14	1.05	0.92	1.01	2.47	1.5	2.44	1.48	0.61	0.86	1.59	3.41	2.25					0.0703	0.0501	0.2683	0.2903	0.2112	0.8337	0.4653	0.1911	0.5589	0.1967	0.8831	0.8554	0.743	0.6959	0.0647	0.4097	0.1739	0.6415	0.1245
	4065			ergothioneine	LC/MS pos early	37459	C05570	HMDB03045	3032311		3.45	1.1	0.8	0.32	0.23	0.73	1.24	1.38	0.78	1.11	0.63	0.57	1.05	0.38	1.32	1.03					0.0005	0.0015	0.1602	0.2439	0.4199	0.8649	0.0249	0.0173	0.0053	0.0057	0.5415	0.8315	0.7713	0.6975	0.7531	0.7358	0.9524	0.8362	0.9809
	4067			erythritol	LC/MS polar	20699	C00503	HMDB02994	222285		2.59	0.39	0.82	0.15	0.32	2.13	1.84	0.77	0.38	0.42	0.2	0.49	1.03	0.73	2.05	0.47					0.0216	0.0199	0.0604	0.1714	0.5295	0.8784	9.9182e-05	0.0002	0.0043	0.0048	0.2016	0.7603	0.0909	0.449	0.508	0.6828	0.0339	0.3279	0.0211
	4072			ferulic acid 4-sulfate	LC/MS neg	47114		HMDB29200	6305574		4.53	1.98	0.98	0.44	0.22	0.5	1.81	1.95	1	1.08	0.55	0.51	0.45	0.18	0.44	0.45					0.0003	0.001	0.1034	0.2077	0.7394	0.8871	0.0265	0.0184	0.0001	0.0003	0.0522	0.7068	0.3062	0.5934	0.3104	0.6268	1	0.8436	0.9928
	4094			homostachydrine*	LC/MS pos early	33009	C08283	HMDB33433	441447		22.2	2.69	3.18	0.12	0.14	1.18	2.44	2.49	1.18	1.02	0.48	0.47	0.81	0.09	0.75	0.3					5.3653e-07	3.434e-05	0.0553	0.1685	0.0154	0.4855	0.0003	0.0004	0.0014	0.002	0.5811	0.8385	0.0586	0.3693	0.0346	0.3493	0.659	0.798	0.8111
	4130			N-glycolylneuraminate	LC/MS pos early	37123	C03410	HMDB00833	123802		1.31	0.41	0.48	0.32	0.36	1.15	0.84	0.41	0.46	0.49	0.55	1.13	1.32	0.85	1.31	1.29					0.1964	0.1061	0.0254	0.1379	0.0465	0.5877	0.0008	0.001	0.0017	0.0023	0.7906	0.8554	0.5457	0.6611	0.0242	0.2939	0.0601	0.419	0.0907
	4207			stachydrine	LC/MS pos early	34384	C10172	HMDB04827	115244		11.34	2.2	1.43	0.19	0.13	0.65	5.14	3.11	1.07	0.6	0.21	0.34	0.55	0.25	0.77	0.41					1.8046e-07	1.7325e-05	0.0133	0.1058	0.2009	0.8337	0.0006	0.0009	1.1954e-05	8.9735e-05	0.204	0.7603	0.0002	0.0292	0.0035	0.1713	0.9112	0.8244	0.3353
	4215			tartarate	LC/MS neg	15336	C00898	HMDB00956	444305		0.52	0.12	1.01	0.22	1.94	8.69	1.68	0.26	0.52	0.15	0.31	2.02	0.98	3.17	2.16	0.5					0.1455	0.0852	0.0002	0.0111	0.8334	0.8989	0.0115	0.0092	0.0976	0.0519	9.2402e-05	0.0228	0.4885	0.6496	0.0092	0.2548	0.3865	0.7458	0.0014
	4232			methyl glucopyranoside (alpha + beta)	LC/MS neg	46144					1.91	0.27	0.3	0.14	0.16	1.12	1.35	0.76	0.58	0.56	0.43	0.77	0.68	0.48	1.93	1.32					0.0543	0.0403	0.0475	0.1605	0.0699	0.6351	0.0002	0.0004	0.0004	0.0009	0.8567	0.8554	0.6477	0.6738	0.6766	0.7055	0.3478	0.745	0.3838
	4260			pyrraline	LC/MS neg	48428		HMDB33143	122228		7.35	4.19	2.02	0.57	0.27	0.48	2.14	4.93	0.94	2.31	0.44	0.19	0.41	0.12	0.48	0.19					0.0002	0.0007	0.002	0.0581	0.1051	0.6884	0.3975	0.1707	0.0162	0.0135	0.1057	0.7342	0.231	0.5472	0.0174	0.2763	0.9129	0.8244	0.2134
	4267			N-acetylpyrraline	LC/MS neg	48438					4.42	3.92	2.4	0.89	0.54	0.61	1.21	2.62	1	2.17	0.83	0.38	0.36	0.1	0.24	0.15					0.0013	0.0029	0.0035	0.0734	0.0789	0.6384	0.7293	0.2579	0.1076	0.0553	0.202	0.7603	0.7912	0.7066	0.4375	0.6652	1	0.8436	0.6075
	4349		Bacterial/Fungal	tartronate (hydroxymalonate)	LC/MS neg	20693	C02287	HMDB35227	45		0.56	0.54	0.35	0.96	0.62	0.64	0.55	0.77	0.31	1.4	0.56	0.4	1.55	1.5	2.18	1.36					0.1433	0.0846	0.0643	0.1714	0.0027	0.2321	0.6843	0.2467	0.0967	0.0516	0.204	0.7603	0.0394	0.3265	0.4929	0.6828	0.0029	0.0777	0.1583
	4740		Drug - Topical Agents	salicylate	LC/MS polar	1515	C00805	HMDB01895	338		0.86	0.64	0.95	0.74	1.1	1.48	1.22	2.2	1	1.8	0.82	0.45	0.38	0.54	1.3	0.4					0.4435	0.1909	0.8957	0.5015	0.4954	0.8649	0.5245	0.2061	0.932	0.2882	0.5812	0.8385	0.6819	0.6746	0.1751	0.5607	0.919	0.8252	0.339
	4767		Drug - Other	S-carboxymethyl-L-cysteine	LC/MS pos early	47897	C03727	HMDB29415	1080		0.74	0.64	0.74	0.87	1	1.16	2.68	1.5	0.59	0.56	0.22	0.39	0.68	2.46	1.6	0.54					0.301	0.1459	0.2951	0.2968	0.3928	0.8649	0.9898	0.3193	0.8549	0.2711	0.8449	0.8554	0.1631	0.5138	0.4171	0.6652	0.3358	0.745	0.5511
	4816		Chemical	sulfate*	LC/MS neg	46960	C00059	HMDB01448	1118		0.78	0.58	0.9	0.73	1.15	1.56	0.74	0.73	0.88	0.99	1.19	1.21	1.04	0.98	1.32	1.02					0.7289	0.2749	0.0328	0.1516	0.9446	0.9027	0.0699	0.0416	0.7816	0.2521	0.0384	0.7068	0.2043	0.5427	0.1869	0.5607	0.6129	0.7892	0.9585
	4819			O-sulfo-L-tyrosine	LC/MS neg	45413			514186		1.05	0.47	0.85	0.45	0.81	1.82	0.9	0.62	0.55	0.69	0.61	0.89	1.37	1.17	1.8	0.88					0.6476	0.2518	0.0183	0.1175	0.4139	0.8649	0.0057	0.0052	0.2058	0.0911	0.1099	0.7342	0.9192	0.7395	0.3042	0.6221	0.2305	0.6752	0.2598
	4837			2-aminophenol sulfate	LC/MS neg	43266		HMDB61116	181670		0.33	2.29	1.76	6.87	5.3	0.77	2.84	3.51	0.81	1.24	0.28	0.23	0.26	2.23	0.4	0.12					0.2863	0.1413	0.0183	0.1175	0.0927	0.6574	0.001	0.0013	0.0078	0.0074	0.4646	0.784	0.2366	0.5472	0.2254	0.5781	0.7672	0.8101	0.9763
	4927			trizma acetate	LC/MS pos early	20710	C07182		6503		0.4	0.47	0.48	1.2	1.22	1.02	0.43	2.02	0.64	4.73	1.5	0.32	1.44	1.55	6.15	1.91					0.0345	0.0286	0.2778	0.2915	0.2576	0.8454	0.283	0.1312	0.3046	0.1239	0.9618	0.8741	0.1118	0.4657	0.913	0.7741	0.2609	0.7007	0.0903
	4941			3-hydroxypyridine sulfate	LC/MS neg	48448					20.06	1.17	0.5	0.06	0.03	0.43	3.02	1.57	1.1	0.52	0.36	0.7	0.41	0.06	0.54	0.89					1.409e-05	0.0002	0.732	0.4546	0.3251	0.8454	4.1888e-05	0.0001	5.7092e-07	1.9369e-05	0.1874	0.7603	0.2291	0.5472	0.6185	0.7037	0.8763	0.8189	0.476
	4955			thioproline	LC/MS pos early	53231			93176		0.74	0.72	1.33	0.97	1.8	1.86	1.87	4.55	1.36	2.43	0.73	0.3	0.78	1.96	4.94	0.8					0.7684	0.2867	0.4316	0.3605	0.7438	0.8871	0.6212	0.2305	0.5352	0.1907	0.2679	0.7603	0.4124	0.6315	0.0602	0.3962	0.5185	0.7737	0.2755
[truncated: 41 more columns]

## Sheet: heatmap
	University of North Carolina at Chapel Hill UNCH-01-18MDCLP HD4 diet and mouse endometrial tumors
	Heat map of statistically significant biochemicals profiled in this study.										Fold of Change																				Statistical Values
											Two-Way ANOVA - Contrasts																Two-Way ANOVA - Main Effects				Two-Way ANOVA - Contrasts
												LFD						HFD					HFD LFD				Diet Effect	Treatment Effect	Diet: Treatment Interaction Effect		LFD												HFD
			Blue shaded cells indicate significant (p≤0.05) ANOVA effect.; light blue shaded cells indicate 0.05<p<0.10								PD1 Control	ONC201 Control	SPR589 Control	ONC201 PD1	SPR589 PD1	SPR589 ONC201	PD1 Control	ONC201 Control	SPR589 Control	ONC201 PD1	SPR589 PD1	SPR589 ONC201	Control	PD1	ONC201	SPR589					PD1 Control		ONC201 Control		SPR589 Control		ONC201 PD1		SPR589 PD1		SPR589 ONC201		PD1 Control		ONC201 Control		SPR589 Control		ONC201 PD1
	Pathway Sort Order	Super Pathway	Sub Pathway	Biochemical Name	Platform	Comp ID	KEGG	HMDB	PUBCHEM	X																				X	p-value	q-value	p-value	q-value	p-value	q-value	p-value	q-value	p-value	q-value	p-value	q-value	p-value	q-value	p-value	q-value	p-value	q-value	p-value
	1	Amino Acid	Glycine, Serine and Threonine Metabolism	glycine	LC/MS pos early	58	C00037	HMDB00123	750		1.12	0.73	0.85	0.65	0.76	1.17	1.66	2.04	1.37	1.23	0.83	0.67	0.86	1.27	2.41	1.39					0.3446	0.1598	0.3849	0.3397	0.9319	0.9027	0.074	0.0433	0.3035	0.1238	0.4327	0.7724	0.1752	0.5138	0.0993	0.4845	0.4577	0.7737	0.7601
	2			N-acetylglycine	LC/MS neg	27710		HMDB00532	10972		0.87	0.49	0.45	0.56	0.52	0.92	0.8	0.8	0.54	1	0.67	0.67	1.32	1.21	2.16	1.59					0.9088	0.3208	0.0195	0.1226	0.0106	0.4233	0.0147	0.0112	0.0079	0.0075	0.8065	0.8554	0.4566	0.6496	0.3908	0.6652	0.0238	0.2698	0.9083
	4			sarcosine	LC/MS pos early	1516	C00213	HMDB00271	1088		35.49	0.97	0.55	0.03	0.02	0.56	0.51	0.23	0.16	0.44	0.31	0.7	3.99	0.06	0.93	1.16					3.2162e-05	0.0003	0.8911	0.5008	0.3867	0.8649	4.955e-05	0.0001	1.9628e-06	3.6995e-05	0.3172	0.7603	0.4116	0.6315	0.1878	0.5607	0.0975	0.4685	0.6126
	5			dimethylglycine	LC/MS pos early	5086	C01026	HMDB00092	673		4.35	0.52	0.83	0.12	0.19	1.61	0.57	0.37	0.26	0.66	0.45	0.69	3.01	0.39	2.17	0.93					0.0014	0.0029	0.1596	0.2439	0.7988	0.8927	1.7649e-05	8.7362e-05	0.0007	0.0011	0.2463	0.7603	0.1089	0.4657	0.0559	0.3894	0.005	0.1037	0.7438
	6			betaine	LC/MS pos early	3141	C00719	HMDB00043	247		6.24	1.12	1.23	0.18	0.2	1.1	1.88	0.99	1.29	0.52	0.68	1.3	1.16	0.35	1.03	1.22					5.9707e-06	0.0001	0.4776	0.3726	0.4746	0.8649	5.7854e-05	0.0001	5.8738e-05	0.0002	0.9961	0.8797	0.0914	0.449	0.8273	0.7593	0.4847	0.7737	0.0583
	7			betaine aldehyde	LC/MS pos early	15499	C00576	HMDB01252	249		2.22	1.4	1.12	0.63	0.5	0.8	3.53	1.32	3.35	0.37	0.95	2.54	0.74	1.18	0.7	2.24					0.047	0.0354	0.2371	0.2756	0.677	0.8871	0.4009	0.1713	0.111	0.0567	0.4395	0.7742	0.0534	0.347	0.4381	0.6652	0.061	0.4194	0.0084
	9			serine	LC/MS pos early	1648	C00065	HMDB00187	5951		1.02	0.6	0.74	0.59	0.72	1.23	1.25	1.2	0.97	0.96	0.77	0.81	1.03	1.26	2.05	1.35					0.6745	0.2616	0.0898	0.1938	0.3259	0.8454	0.0367	0.0243	0.164	0.0784	0.4612	0.7809	0.4018	0.6315	0.5571	0.6897	0.7906	0.8134	0.7999
	10			N-acetylserine	LC/MS pos early	37076		HMDB02931	65249		0.85	0.59	0.75	0.69	0.88	1.27	0.89	1.14	0.79	1.29	0.89	0.69	1.23	1.27	2.36	1.29					0.6156	0.2427	0.0504	0.1605	0.2627	0.8454	0.1386	0.0731	0.5323	0.1901	0.3834	0.7603	0.4907	0.6496	0.6404	0.7037	0.3604	0.7458	0.2504
	16			threonine	LC/MS pos early	1284	C00188	HMDB00167	6288		1.01	0.67	0.69	0.66	0.68	1.03	1.44	1.36	1.12	0.94	0.78	0.83	0.89	1.27	1.81	1.45					0.5819	0.2333	0.2087	0.2671	0.3044	0.8454	0.0743	0.0433	0.1185	0.06	0.8136	0.8554	0.2461	0.5472	0.3832	0.6652	0.9083	0.8244	0.7692
	17			N-acetylthreonine	LC/MS neg	33939		HMDB62557	152204		1.17	0.64	0.75	0.55	0.64	1.17	1.47	0.84	0.75	0.57	0.51	0.9	1.32	1.65	1.72	1.32					0.2971	0.1448	0.1689	0.246	0.378	0.8649	0.0184	0.0135	0.0585	0.0341	0.6132	0.8445	0.4855	0.6496	0.5424	0.6843	0.2739	0.7019	0.1948
	28		Alanine and Aspartate Metabolism	alanine	LC/MS pos early	1126	C00041	HMDB00161	5950		1.71	0.77	0.83	0.45	0.49	1.08	1.32	1.12	0.88	0.85	0.67	0.78	1.11	0.86	1.62	1.18					0.0119	0.0125	0.275	0.2907	0.3496	0.8459	0.0006	0.0008	0.0009	0.0014	0.8733	0.8554	0.2424	0.5472	0.684	0.7066	0.4316	0.7551	0.442
	30			N-acetylalanine	LC/MS neg	1585	C02847	HMDB00766	88064		0.79	0.29	0.36	0.37	0.45	1.23	0.67	0.49	0.54	0.72	0.8	1.11	1.41	1.2	2.36	2.12					0.9021	0.319	0.0105	0.0984	0.0494	0.5877	0.0076	0.0068	0.0376	0.0244	0.5137	0.8193	0.6697	0.6741	0.2878	0.6103	0.335	0.745	0.521
	34			aspartate	LC/MS pos early	443	C00049	HMDB00191	5960		0.89	0.74	1.03	0.83	1.16	1.4	1.29	1.43	1.18	1.1	0.91	0.83	1.02	1.49	1.99	1.18					0.9704	0.3339	0.4728	0.3726	0.9469	0.9027	0.4504	0.1867	0.9174	0.2861	0.5144	0.8193	0.308	0.5941	0.1955	0.563	0.5001	0.7737	0.778
	35			N-acetylaspartate (NAA)	LC/MS neg	22185	C01042	HMDB00812	65065		0.49	0.71	3.24	1.45	6.63	4.57	0.2	0.24	0.17	1.22	0.87	0.71	5.17	2.08	1.75	0.27					0.0174	0.0169	0.4454	0.362	0.8687	0.9027	0.0948	0.0526	0.0258	0.0187	0.549	0.8345	0.6477	0.6738	0.8373	0.7598	0.5325	0.7749	0.8009
	38			asparagine	LC/MS pos early	512	C00152	HMDB00168	6267		0.77	0.56	0.74	0.73	0.96	1.32	1.31	1.39	0.98	1.06	0.75	0.7	1.06	1.81	2.65	1.41					0.4065	0.1794	0.0821	0.1895	0.3569	0.8497	0.3504	0.1545	0.9263	0.2878	0.3995	0.7603	0.3635	0.6315	0.3381	0.645	0.9123	0.8244	0.9601
	39			N-acetylasparagine	LC/MS pos early	33942		HMDB06028	99715		4.74	0.44	1.69	0.09	0.36	3.82	3.46	0.55	0.66	0.16	0.19	1.2	1.43	1.05	1.76	0.55					0.0175	0.0169	0.115	0.2165	0.7287	0.8871	0.0002	0.0003	0.0394	0.0252	0.0569	0.7068	0.8872	0.7291	0.3097	0.6268	0.4636	0.7737	0.3809
	41		Glutamate Metabolism	glutamate	LC/MS pos early	57	C00025	HMDB00148	611		1.1	0.84	0.86	0.77	0.78	1.02	1.53	1.48	1.36	0.97	0.89	0.92	0.93	1.29	1.63	1.47					0.3886	0.1751	0.7172	0.4529	0.7202	0.8871	0.2235	0.1089	0.225	0.0971	0.9967	0.8797	0.1039	0.4657	0.1282	0.5032	0.2846	0.7184	0.9125
	42			glutamine	LC/MS pos early	53	C00064	HMDB00641	5961		1.4	0.57	0.95	0.41	0.68	1.65	0.94	0.75	0.88	0.79	0.93	1.18	1.07	0.72	1.39	0.99					0.1075	0.0689	0.0116	0.103	0.9478	0.9027	0.0001	0.0002	0.0946	0.0508	0.0137	0.527	0.6047	0.6636	0.1149	0.5032	0.6495	0.798	0.2823
	43			alpha-ketoglutaramate*	LC/MS polar	62101					1.33	0.56	2.57	0.42	1.94	4.62	0.85	0.4	0.99	0.47	1.16	2.47	1.88	1.2	1.34	0.72					0.4179	0.1832	0.0794	0.1879	0.0726	0.6351	0.0124	0.0096	0.3114	0.1261	0.0008	0.126	0.7975	0.7084	0.0368	0.3636	0.8533	0.8189	0.0645
	44			N-acetylglutamate	LC/MS pos early	15720	C00624	HMDB01138	70914		6.82	0.93	0.93	0.14	0.14	1	1.67	0.52	0.43	0.31	0.25	0.82	1.27	0.31	0.7	0.58					0.0003	0.001	0.8164	0.4705	0.7874	0.8883	0.0002	0.0003	0.0001	0.0003	0.9701	0.8768	0.4883	0.6496	0.3129	0.628	0.1416	0.5888	0.0929
	45			N-acetylglutamine	LC/MS polar	33943	C02716	HMDB06029	182230		16.05	0.58	1.67	0.04	0.1	2.87	6.16	0.27	0.47	0.04	0.08	1.73	2.89	1.11	1.35	0.81					0.0004	0.0013	0.4431	0.3619	0.7849	0.8883	4.0584e-05	0.0001	0.001	0.0015	0.3003	0.7603	0.3448	0.6297	0.0496	0.3894	0.3161	0.7346	0.0049
	47			4-hydroxyglutamate	LC/MS pos early	40499	C03079	HMDB01344	439902		2	0.5	0.65	0.25	0.32	1.29	2.23	0.73	0.38	0.33	0.17	0.52	1.28	1.43	1.86	0.75					0.1707	0.0958	0.287	0.2926	0.3636	0.8519	0.0177	0.0132	0.0259	0.0187	0.8737	0.8554	0.7077	0.6877	0.3883	0.6652	0.0642	0.4283	0.2186
	49			gamma-carboxyglutamate	LC/MS pos early	38754		HMDB41900	40772		1.11	0.46	0.43	0.41	0.39	0.95	1.07	1.14	1.08	1.06	1.01	0.95	0.76	0.74	1.91	1.91					0.2895	0.1421	0.0678	0.1742	0.1169	0.6884	0.0053	0.0049	0.0107	0.0097	0.7849	0.8554	0.8685	0.7231	0.7137	0.7212	0.857	0.8189	0.5949
	50			glutamate, gamma-methyl ester	LC/MS pos early	33487		HMDB61715	68662		1.67	0.81	0.84	0.48	0.5	1.04	1.72	1.33	1.16	0.77	0.68	0.88	1.03	1.06	1.69	1.43					0.0398	0.0316	0.6267	0.4269	0.4637	0.8649	0.0125	0.0096	0.0066	0.0067	0.8042	0.8554	0.1064	0.4657	0.4269	0.6652	0.7932	0.8134	0.4009
	51			pyroglutamine*	LC/MS pos early	46225			134508		6.12	0.75	1.28	0.12	0.21	1.71	4.53	1.52	0.73	0.34	0.16	0.48	0.57	0.42	1.15	0.33					0.0042	0.006	0.5394	0.391	0.4823	0.8649	0.0007	0.001	0.0252	0.0184	0.1917	0.7603	0.0718	0.4046	0.6439	0.7037	0.5686	0.7773	0.1742
	52			N-acetyl-aspartyl-glutamate (NAAG)	LC/MS pos early	35665	C12270	HMDB01067	5255		0.09	0.71	0.28	8.03	3.22	0.4	0.08	0.1	0.06	1.18	0.77	0.65	1.62	1.55	0.23	0.37					0.0059	0.0078	0.1313	0.2293	0.1255	0.6884	0.1796	0.0912	0.1872	0.0856	0.9809	0.8797	0.0145	0.2294	0.0726	0.4299	0.0173	0.2223	0.481
	53			beta-citrylglutamate	LC/MS neg	54923	C20775		72715786		0.22	0.25	0.4	1.18	1.87	1.58	1.13	1.29	0.68	1.14	0.6	0.53	0.55	2.89	2.79	0.93					0.0026	0.0044	0.1469	0.2419	0.3231	0.8454	0.0912	0.0512	0.0329	0.0221	0.6346	0.8461	0.71	0.6877	0.7188	0.7212	0.673	0.798	0.4654
	59			S-1-pyrroline-5-carboxylate	LC/MS pos early	42370	C04322	HMDB01301	1196		2.59	0.76	0.65	0.3	0.25	0.86	1.7	0.39	0.91	0.23	0.53	2.32	1.17	0.77	0.6	1.63					0.0115	0.0124	0.4579	0.3676	0.3226	0.8454	0.0015	0.0017	0.0007	0.0012	0.8023	0.8554	0.2542	0.5534	0.0468	0.3894	0.9049	0.8244	0.0026
	65		Histidine Metabolism	histidine	LC/MS neg	59	C00135	HMDB00177	6274		1.86	0.68	0.82	0.36	0.44	1.22	1.43	1.11	1.05	0.77	0.74	0.95	0.99	0.76	1.62	1.27					0.0072	0.009	0.1319	0.2293	0.4757	0.8649	8.5335e-05	0.0002	0.001	0.0015	0.4181	0.7603	0.2008	0.5369	0.8591	0.7598	0.9776	0.8427	0.2686
	66			1-methylhistidine	LC/MS pos early	30460	C01152	HMDB00001	92105		0.56	0.56	0.74	1.01	1.33	1.31	1.58	1.66	1.6	1.05	1.01	0.96	1.13	3.23	3.35	2.45					0.5726	0.2305	0.3344	0.3149	0.7592	0.8871	0.6853	0.2467	0.7959	0.2562	0.5076	0.8178	0.6632	0.6741	0.1767	0.5607	0.3191	0.738	0.3546
	67			3-methylhistidine	LC/MS neg	15677	C01152	HMDB00479	64969		0.27	0.43	0.63	1.61	2.35	1.46	1.7	0.91	1.34	0.54	0.79	1.47	0.75	4.81	1.6	1.61					0.0307	0.0257	0.273	0.2903	0.7979	0.8927	0.2656	0.125	0.0543	0.032	0.3984	0.7603	0.6444	0.6738	0.9841	0.7897	0.6951	0.798	0.6302
	68			N-acetylhistidine	LC/MS pos early	33946	C02997	HMDB32055	75619		16.34	0.37	1.09	0.02	0.07	2.95	3.93	0.29	0.36	0.07	0.09	1.27	2.4	0.58	1.86	0.8					0.0006	0.0015	0.1229	0.2227	0.9189	0.9027	4.3237e-06	4.6029e-05	0.0008	0.0013	0.1011	0.7342	0.4784	0.6496	0.1091	0.4997	0.1753	0.6415	0.0236
	69			N-acetyl-3-methylhistidine*	LC/MS pos early	43256			193270		5.91	0.22	1.56	0.04	0.26	6.96	10.91	0.38	0.76	0.04	0.07	1.99	1.25	2.31	2.13	0.61					0.0294	0.0249	0.0656	0.1717	0.5676	0.8871	0.0002	0.0003	0.1003	0.0527	0.0179	0.5933	0.2896	0.5771	0.1448	0.5271	0.6794	0.798	0.0143
	70			N-acetyl-1-methylhistidine*	LC/MS pos early	43255			193270		3.42	0.28	1.06	0.08	0.31	3.83	4	0.73	0.63	0.18	0.16	0.87	1.84	2.15	4.83	1.1					0.0092	0.0108	0.0847	0.1925	0.425	0.8649	5.6252e-05	0.0001	0.0605	0.0347	0.0139	0.527	0.5768	0.6632	0.3562	0.6539	0.3276	0.745	0.1425
	72			trans-urocanate	LC/MS pos early	607	C00785	HMDB00301	736715		0.68	0.52	0.88	0.77	1.29	1.68	1.8	1.28	1.67	0.71	0.93	1.3	0.51	1.35	1.25	0.97					0.0456	0.0345	0.934	0.5133	0.6961	0.8871	0.0546	0.0337	0.0184	0.0149	0.6362	0.8461	0.8979	0.7311	0.95	0.7841	0.5469	0.7773	0.9477
	73			cis-urocanate	LC/MS neg	40410		HMDB34174	1549103		0.66	0.56	0.5	0.85	0.77	0.9	1.63	1.03	1.35	0.63	0.83	1.31	0.61	1.52	1.13	1.65					0.0079	0.0096	0.321	0.3133	0.054	0.5877	0.0807	0.0465	0.4215	0.1582	0.333	0.7603	0.4936	0.6496	0.9752	0.7876	0.5718	0.7773	0.4744
	74			imidazole propionate	LC/MS pos early	40730		HMDB02271	70630		7.72	0.75	1.39	0.1	0.18	1.84	2.29	1.74	1.7	0.76	0.74	0.97	1.26	0.37	2.93	1.55					0.0028	0.0046	0.1685	0.246	0.7235	0.8871	4.4441e-05	0.0001	0.0074	0.0072	0.0863	0.7205	0.2735	0.572	0.5932	0.6982	0.4255	0.7522	0.5708
	75			formiminoglutamate	LC/MS pos early	43493	C00439	HMDB00854	439233		0.57	0.06	0.08	0.11	0.14	1.26	0.3	0.07	0.03	0.24	0.11	0.47	2.06	1.08	2.33	0.86					0.6282	0.2462	2.5823e-05	0.0038	0.0001	0.0301	0.0001	0.0002	0.0005	0.0009	0.649	0.8461	0.1171	0.4757	0.0004	0.0987	4.4335e-06	0.0011	0.0317
	76			imidazole lactate	LC/MS pos early	15716	C05568	HMDB02320	440129		3.38	0.53	0.74	0.16	0.22	1.41	1.53	1.51	0.38	0.99	0.25	0.25	1.79	0.81	5.15	0.92					0.0148	0.0151	0.3253	0.3133	0.6511	0.8871	0.001	0.0013	0.0046	0.0049	0.592	0.8385	0.7676	0.6975	0.9314	0.7757	0.07	0.4418	0.834
	77			carnosine	LC/MS neg	1768	C00386	HMDB00033	439224		0.29	0.75	0.51	2.64	1.8	0.68	0.15	0.18	0.18	1.24	1.27	1.02	1.29	0.66	0.31	0.46					0.1135	0.0717	0.5562	0.3982	0.77	0.8871	0.3117	0.1416	0.1931	0.0876	0.7664	0.8554	0.1232	0.4772	0.2411	0.5853	0.3079	0.7314	0.7025
	80			anserine	LC/MS pos early	15747	C01262	HMDB00194	112072		0.09	1.36	0.57	14.58	6.07	0.42	0.05	0.04	0.02	0.87	0.51	0.58	2.84	1.39	0.08	0.12					0.1045	0.0678	0.2021	0.2609	0.674	0.8871	0.7175	0.2552	0.2231	0.0965	0.3878	0.7603	0.0864	0.4413	0.0804	0.4403	0.015	0.2222	0.9712
	81			histamine	LC/MS pos early	1574	C00388	HMDB00870	774		0.29	0.88	0.61	3.09	2.13	0.69	1.49	1.16	0.48	0.78	0.33	0.42	0.56	2.94	0.74	0.45					0.0056	0.0075	0.954	0.5184	0.2967	0.8454	0.0065	0.0059	0.0687	0.0387	0.3237	0.7603	0.3845	0.6315	0.8804	0.7665	0.3812	0.7458	0.3088
	82			1-methylhistamine	LC/MS pos early	43831	C05127	HMDB00898	3614		0.46	0.74	0.48	1.61	1.03	0.64	1.17	0.77	0.76	0.66	0.65	0.99	0.95	2.41	0.99	1.52					0.0029	0.0046	0.5819	0.4077	0.153	0.7532	0.0124	0.0096	0.0937	0.0505	0.3727	0.7603	0.8203	0.7093	0.4934	0.6828	0.5611	0.7773	0.6461
	83			1-methyl-4-imidazoleacetate	LC/MS pos early	32350	C05828	HMDB02820	75810		3.2	0.44	0.79	0.14	0.25	1.82	1.81	0.34	0.45	0.19	0.25	1.32	1.18	0.67	0.92	0.67					0.0043	0.006	0.0335	0.1516	0.6208	0.8871	5.6502e-06	4.662e-05	0.0011	0.0015	0.0963	0.7325	0.2882	0.5771	0.0071	0.2138	0.087	0.4637	0.0003
	84			1-ribosyl-imidazoleacetate*	LC/MS pos early	61868	C05131	HMDB02331	5117448		2.79	0.44	0.57	0.16	0.21	1.32	1.1	0.48	0.32	0.44	0.29	0.67	0.94	0.37	1.03	0.52					0.0025	0.0043	0.3252	0.3133	0.7132	0.8871	0.0001	0.0003	0.0009	0.0014	0.5349	0.8238	0.5955	0.6636	0.0607	0.3962	0.0048	0.1037	0.1706
	85			4-imidazoleacetate	LC/MS pos early	32349	C02835	HMDB02024	96215		0.44	0.48	0.56	1.1	1.28	1.16	1.48	0.94	0.82	0.63	0.56	0.88	0.28	0.95	0.55	0.41					0.0424	0.0331	0.037	0.1548	0.0916	0.6574	0.9515	0.3099	0.7145	0.2331	0.6698	0.8461	0.2703	0.5703	0.6368	0.7037	0.3078	0.7314	0.1189
	92		Lysine Metabolism	lysine	LC/MS pos early	1301	C00047	HMDB00182	5962		1.72	0.54	0.84	0.32	0.49	1.55	0.99	0.81	0.65	0.81	0.66	0.81	1.23	0.71	1.82	0.95					0.0174	0.0169	0.0172	0.1173	0.5928	0.8871	1.318e-05	7.9218e-05	0.0044	0.0048	0.0586	0.7068	0.996	0.7488	0.3826	0.6652	0.0959	0.4685	0.3853
	93			N2-acetyllysine	LC/MS polar	36751	C12989	HMDB00446	92907		1.42	1	1	0.7	0.7	1	3.22	1	1	0.31	0.31	1	1	2.26	1	1					0.2729	0.1365	1	0.526	1	0.9214	0.2729	0.1278	0.2729	0.1132	1	0.8797	0.0164	0.2378	1	0.7904	1	0.8436	0.0164
	94			N6-acetyllysine	LC/MS neg	36752	C02727	HMDB00206	92832		2.17	0.51	0.6	0.24	0.28	1.18	1.2	0.76	0.57	0.63	0.47	0.75	1.26	0.7	1.88	1.19					0.0061	0.008	0.0761	0.183	0.2026	0.8337	2.9311e-05	0.0001	0.0001	0.0004	0.6023	0.8385	0.5775	0.6632	0.2291	0.5781	0.0601	0.419	0.0822
	101			N6,N6,N6-trimethyllysine	LC/MS pos early	1498	C03793	HMDB01325	440120		1.89	0.53	0.69	0.28	0.37	1.32	1.02	0.88	0.54	0.86	0.53	0.61	1.34	0.72	2.24	1.04					0.0358	0.0294	0.0584	0.1714	0.3927	0.8649	0.0002	0.0003	0.0042	0.0047	0.2846	0.7603	0.8864	0.7291	0.5713	0.6915	0.0708	0.4418	0.6717
	102			5-hydroxylysine	LC/MS pos early	15685	C16741	HMDB00450	1029		0.44	0.35	0.82	0.8	1.87	2.34	0.75	1.25	1.04	1.68	1.4	0.83	0.61	1.05	2.2	0.78					0.0045	0.0062	0.2184	0.2679	0.8179	0.8989	0.0857	0.0491	0.0082	0.0077	0.3144	0.7603	0.6702	0.6741	0.6257	0.7037	0.832	0.8184	0.3628
	103			5-(galactosylhydroxy)-L-lysine	LC/MS pos early	43582					0.56	0.64	0.72	1.15	1.29	1.12	0.91	1.72	1.13	1.9	1.25	0.66	0.73	1.19	1.96	1.15					0.1039	0.0677	0.4355	0.3619	0.7578	0.8871	0.3862	0.1662	0.1835	0.0845	0.6358	0.8461	0.7237	0.6877	0.278	0.6103	0.7561	0.8056	0.1532
	104			saccharopine	LC/MS pos early	1495	C00449	HMDB00279	160556		13.06	0.39	0.39	0.03	0.03	1	6.65	0.53	0.53	0.08	0.08	1	0.74	0.37	1	1					0.0009	0.0021	0.5228	0.3864	0.5228	0.8733	0.0001	0.0003	0.0001	0.0003	1	0.8797	0.1768	0.5138	0.6142	0.7037	0.6142	0.7892	0.067
	105			2-aminoadipate	LC/MS pos early	6146	C00956	HMDB00510	469		1.83	0.11	0.19	0.06	0.11	1.82	1.02	0.31	0.29	0.3	0.28	0.93	0.76	0.43	2.2	1.12					0.1055	0.0682	0.0816	0.1895	0.1683	0.7852	0.0014	0.0016	0.0039	0.0045	0.7034	0.8461	0.7221	0.6877	0.3958	0.6652	0.2053	0.6623	0.2309
	109			glutarylcarnitine (C5-DC)	LC/MS pos early	44664		HMDB13130	71464488		42.6	0.15	0.29	0	0.01	1.87	28.26	0.42	0.41	0.01	0.01	0.96	0.8	0.53	2.2	1.13					7.2314e-06	0.0001	0.0523	0.1628	0.3353	0.8454	1.1444e-08	1.0318e-06	3.1077e-07	1.7572e-05	0.3116	0.7603	0.1328	0.4877	0.2658	0.5994	0.2307	0.6752	0.0111
	113			pipecolate	LC/MS pos early	1444	C00408	HMDB00070	849		1.32	1.7	0.96	1.29	0.73	0.57	2.04	2.23	1.22	1.09	0.6	0.54	1.2	1.85	1.58	1.51					0.2018	0.1081	0.3979	0.3481	0.9533	0.9027	0.6599	0.2404	0.1825	0.0845	0.3665	0.7603	0.214	0.5472	0.0445	0.3894	0.6579	0.798	0.4215
	117			5-aminovalerate	LC/MS pos early	18319	C00431	HMDB03355	138		1.76	1.2	0.78	0.68	0.45	0.65	2.29	0.47	0.83	0.2	0.36	1.77	1.02	1.33	0.4	1.08					0.0542	0.0403	0.7561	0.458	0.443	0.8649	0.1025	0.0565	0.0087	0.0081	0.2833	0.7603	0.0152	0.2294	0.0531	0.3894	0.5626	0.7773	5.2348e-05
	119			N,N,N-trimethyl-5-aminovalerate	LC/MS pos early	57687					0.94	0.92	0.98	0.98	1.03	1.06	1.41	1.38	0.98	0.98	0.7	0.71	0.54	0.8	0.8	0.54					0.7966	0.2925	0.9722	0.5216	0.8416	0.8989	0.8236	0.282	0.9538	0.2925	0.8689	0.8554	0.3011	0.5874	0.4163	0.6652	0.9409	0.8336	0.8221
	120		Phenylalanine Metabolism	phenylalanine	LC/MS pos early	64	C00079	HMDB00159	6140		1.3	0.65	0.68	0.5	0.52	1.04	1.09	1.01	0.83	0.93	0.76	0.82	1.12	0.94	1.75	1.37					0.1035	0.0676	0.1204	0.2212	0.2142	0.8337	0.0023	0.0024	0.0056	0.0059	0.7471	0.8554	0.757	0.6975	0.973	0.7873	0.3441	0.745	0.7314
	121			N-acetylphenylalanine	LC/MS neg	33950	C03519	HMDB00512	74839		1.88	0.54	1.45	0.29	0.77	2.68	1.78	0.26	0.51	0.15	0.29	1.94	2.34	2.22	1.14	0.82					0.1705	0.0958	0.1977	0.2609	0.5934	0.8871	0.01	0.0083	0.3963	0.1511	0.072	0.7068	0.5351	0.659	0.0215	0.2939	0.2498	0.7007	0.0848
	122			1-carboxyethylphenylalanine	LC/MS neg	62566					1.9	0.5	0.32	0.26	0.17	0.64	1.51	1.15	0.79	0.77	0.52	0.68	1.09	0.86	2.49	2.67					0.0293	0.0249	0.1473	0.2419	0.0219	0.4915	0.0006	0.0008	3.6355e-05	0.0001	0.3694	0.7603	0.2596	0.5615	0.6626	0.7054	0.352	0.745	0.4854
	125			phenylpyruvate	LC/MS polar	566	C00166	HMDB00205	997		2.26	0.58	0.63	0.26	0.28	1.09	1.25	0.7	0.68	0.56	0.54	0.97	1.07	0.59	1.3	1.16					0.0079	0.0096	0.2136	0.2673	0.0736	0.6351	0.0002	0.0004	3.781e-05	0.0001	0.5695	0.8385	0.6691	0.6741	0.2632	0.5994	0.2664	0.7007	0.1254
	126			phenyllactate (PLA)	LC/MS neg	22130	C05607	HMDB00779	3848		1.46	0.47	0.75	0.32	0.51	1.61	0.43	0.62	0.32	1.45	0.75	0.52	2.11	0.62	2.82	0.91					0.2022	0.1081	0.0078	0.0903	0.3005	0.8454	0.0002	0.0003	0.024	0.0178	0.0874	0.7205	0.0072	0.1823	0.0341	0.3493	7.7697e-05	0.0123	0.5261
	137		Tyrosine Metabolism	tyrosine	LC/MS pos early	1299	C00082	HMDB00158	6057		1.78	0.89	0.98	0.5	0.55	1.09	1.01	0.79	0.64	0.79	0.63	0.8	1.94	1.09	1.72	1.26					0.0086	0.0103	0.968	0.5203	0.7058	0.8871	0.0095	0.008	0.022	0.0167	0.7357	0.851	0.9813	0.7488	0.4247	0.6652	0.0886	0.4637	0.4383
	138			N-acetyltyrosine	LC/MS neg	32390		HMDB00866	68310		1.06	0.7	1.46	0.66	1.37	2.08	2.26	0.17	0.24	0.08	0.11	1.39	4.84	10.3	1.19	0.79					0.9448	0.3281	0.4174	0.3546	0.9952	0.9187	0.3793	0.1644	0.9401	0.2894	0.4208	0.7603	0.2402	0.5472	0.0131	0.2763	0.0263	0.2771	0.1678
	139			1-carboxyethyltyrosine	LC/MS neg	62564					1.69	0.54	0.31	0.32	0.18	0.58	1.05	0.75	0.45	0.71	0.43	0.6	1.79	1.12	2.52	2.59					0.097	0.0649	0.1651	0.244	0.0138	0.4758	0.0034	0.0033	0.0001	0.0003	0.252	0.7603	0.7323	0.6905	0.6643	0.7054	0.0393	0.3391	0.439
	147			4-hydroxyphenylpyruvate	LC/MS neg	1669	C01179	HMDB00707	979		2.62	0.66	0.73	0.25	0.28	1.11	0.55	0.41	0.37	0.75	0.67	0.89	1.5	0.32	0.94	0.75					0.0036	0.0054	0.1252	0.2243	0.0563	0.5877	3.4832e-05	0.0001	9.8065e-06	8.9735e-05	0.6914	0.8461	0.0551	0.353	0.0066	0.2138	0.0013	0.0463	0.3772
	150			3-(4-hydroxyphenyl)lactate	LC/MS neg	32197	C03672	HMDB00755	9378		3.48	0.53	0.51	0.15	0.15	0.97	0.34	0.29	0.17	0.86	0.51	0.6	3.65	0.36	2.02	1.25					0.0098	0.0113	0.0973	0.2011	0.1218	0.6884	7.5641e-05	0.0002	0.0001	0.0003	0.9072	0.8643	0.0195	0.2502	0.0099	0.2586	0.0003	0.0203	0.7843
	154			phenol sulfate	LC/MS neg	32553	C02180	HMDB60015	74426		0.87	1.32	1.11	1.51	1.28	0.85	1.93	1.72	1.33	0.89	0.69	0.77	0.58	1.28	0.76	0.69					0.5554	0.225	0.4367	0.3619	0.9746	0.9106	0.1751	0.0895	0.5768	0.2013	0.4183	0.7603	0.0236	0.2502	0.1016	0.4851	0.2476	0.7007	0.5021
	155			phenol glucuronide	LC/MS neg	52747		HMDB60014	87235		1.12	3.48	0.95	3.1	0.85	0.27	7.46	3.15	1.4	0.42	0.19	0.44	0.35	2.35	0.32	0.52					0.9654	0.3332	0.0838	0.1921	0.9112	0.9027	0.0914	0.0512	0.8768	0.2765	0.0667	0.7068	0.015	0.2294	0.1842	0.5607	0.6846	0.798	0.2412
	168			3-methoxytyrosine	LC/MS pos early	12017		HMDB01434	1670		0.83	1.48	1.4	1.79	1.68	0.94	1.43	0.99	1.24	0.69	0.86	1.24	1.79	3.09	1.2	1.58					0.8458	0.3053	0.3133	0.3106	0.4542	0.8649	0.2307	0.1109	0.3471	0.1369	0.792	0.8554	0.3831	0.6315	0.6037	0.7037	0.5967	0.783	0.7217
	189			p-cresol glucuronide*	LC/MS neg	48841		HMDB11686	154035		0.59	0.43	0.43	0.73	0.73	1	0.65	0.58	0.36	0.89	0.55	0.62	1.05	1.17	1.41	0.88					0.1758	0.0984	0.06	0.1714	0.0877	0.6574	0.5802	0.2193	0.7119	0.2331	0.8536	0.8554	0.0431	0.3362	0.1785	0.5607	0.0335	0.3279	0.4756
	191			N-formylphenylalanine	LC/MS neg	48433			759256		0.57	0.3	0.5	0.53	0.89	1.66	0.52	0.62	0.35	1.19	0.66	0.55	1.78	1.65	3.66	1.22					0.1222	0.0747	0.0103	0.0984	0.0592	0.5895	0.2719	0.1277	0.7184	0.2339	0.4572	0.7775	0.1809	0.5138	0.3659	0.659	0.043	0.3578	0.6571
	210		Tryptophan Metabolism	tryptophan	LC/MS pos early	54	C00078	HMDB00929	6305		1.16	0.72	0.78	0.62	0.68	1.08	1.36	1.14	0.95	0.84	0.7	0.83	1	1.18	1.58	1.22					0.3435	0.1597	0.1038	0.2077	0.272	0.8454	0.0123	0.0096	0.0447	0.0276	0.5849	0.8385	0.2111	0.5472	0.5999	0.7031	0.674	0.798	0.4623
	211			N-acetyltryptophan	LC/MS neg	33959	C03137	HMDB13713	700653		0.46	0.78	1.29	1.68	2.79	1.66	2.2	0.63	0.83	0.29	0.38	1.33	0.98	4.67	0.79	0.63					0.1796	0.1	0.4991	0.3802	0.9922	0.9187	0.4982	0.1996	0.1827	0.0845	0.5053	0.8178	0.8277	0.7106	0.2171	0.5696	0.5853	0.7812	0.3069
	217			C-glycosyltryptophan	LC/MS pos early	48782			10981970		0.68	0.57	0.72	0.84	1.05	1.26	1.06	1.34	1.49	1.26	1.4	1.11	0.97	1.51	2.27	2.01					0.1152	0.0721	0.2411	0.2756	0.6355	0.8871	0.6765	0.2445	0.2641	0.1101	0.4804	0.8018	0.9611	0.7458	0.5291	0.6828	0.3028	0.7314	0.4979
	221			kynurenine	LC/MS pos early	15140	C00328	HMDB00684	161166		1.38	0.15	0.15	0.11	0.11	1.05	0.93	0.41	0.42	0.44	0.45	1.03	0.48	0.32	1.34	1.3					0.0735	0.0523	0.0033	0.0734	0.0026	0.2321	1.3112e-05	7.9218e-05	1.0179e-05	8.9735e-05	0.9371	0.8683	0.7877	0.705	0.0935	0.4774	0.0737	0.4482	0.1557
	223			N-acetylkynurenine (2)	LC/MS pos early	48757					0.26	0.21	0.95	0.8	3.67	4.56	1.99	0.15	0.45	0.07	0.22	3.05	0.8	6.16	0.56	0.38					0.1578	0.0913	0.1096	0.2131	0.8425	0.8989	0.8447	0.2858	0.2224	0.0965	0.1586	0.7603	0.4018	0.6315	0.016	0.2763	0.2788	0.7108	0.1032
	225			kynurenate	LC/MS neg	1417	C01717	HMDB00715	3845		2.36	0.51	1.1	0.22	0.47	2.15	0.5	0.21	0.33	0.41	0.67	1.62	2.55	0.54	1.02	0.77					0.067	0.0484	0.1236	0.2227	0.9522	0.9027	0.0013	0.0015	0.0591	0.0342	0.1382	0.7378	0.54	0.6611	0.018	0.2763	0.2158	0.6643	0.0717
	234			serotonin	LC/MS pos early	2342	C00780	HMDB00259	5202		0.97	0.96	1.02	0.99	1.05	1.06	0.65	1.07	0.6	1.65	0.92	0.56	1	0.68	1.12	0.59					0.3254	0.1532	0.5694	0.4018	0.5145	0.8711	0.6753	0.2445	0.1061	0.0549	0.2254	0.7603	0.8538	0.7184	0.489	0.6828	0.7405	0.805	0.3821
	237			5-hydroxyindoleacetate	LC/MS pos early	437	C05635	HMDB00763	1826		0.48	0.97	0.73	2	1.51	0.76	0.7	0.85	0.78	1.21	1.11	0.92	0.88	1.28	0.77	0.94					0.0423	0.0331	0.9592	0.5186	0.1914	0.8271	0.0473	0.0301	0.4463	0.1646	0.2088	0.7603	0.7666	0.6975	0.5669	0.6897	0.732	0.8006	0.3861
	241			indolelactate	LC/MS pos early	18349	C02043	HMDB00671	92904		0.77	0.48	0.84	0.63	1.09	1.74	0.45	0.66	0.78	1.46	1.72	1.17	1.32	0.78	1.81	1.22					0.4857	0.2054	0.0324	0.1516	0.739	0.8871	0.1381	0.073	0.7146	0.2331	0.0672	0.7068	0.0067	0.1823	0.1314	0.5032	0.3207	0.7381	0.1934
	242			indoleacetate	LC/MS neg	27513	C00954	HMDB00197	802		1.26	1.03	0.89	0.82	0.7	0.86	1.13	0.81	0.68	0.72	0.6	0.84	0.75	0.67	0.59	0.57					0.1229	0.0747	0.9468	0.5164	0.9374	0.9027	0.1082	0.0591	0.1058	0.0549	0.9906	0.8797	0.9816	0.7488	0.4282	0.6652	0.1786	0.6415	0.4416
	244			indolepropionate	LC/MS neg	32405		HMDB02302	3744		0.98	1.53	1.17	1.56	1.19	0.76	0.88	1.08	0.37	1.23	0.42	0.34	0.38	0.34	0.27	0.12					0.4086	0.1799	0.0649	0.1714	0.1542	0.7532	0.2942	0.1352	0.5405	0.1922	0.6583	0.8461	0.897	0.7311	0.8963	0.774	0.1437	0.5925	0.7951
	251			indoleacetylglycine	LC/MS neg	54730			446640		4.09	1.78	2.39	0.43	0.59	1.35	0.8	0.44	0.23	0.55	0.29	0.53	2.55	0.5	0.63	0.25					0.0069	0.0087	0.4862	0.3753	0.2048	0.8337	0.038	0.025	0.1267	0.0634	0.5611	0.8385	0.7229	0.6877	0.292	0.6103	0.0626	0.424	0.4814
	254			3-indoxyl sulfate	LC/MS neg	27672		HMDB00682	10258		0.59	0.89	0.84	1.5	1.42	0.94	0.73	0.8	0.73	1.1	0.99	0.9	0.86	1.06	0.77	0.74					0.107	0.0689	0.9519	0.5182	0.7468	0.8871	0.1202	0.0643	0.1931	0.0876	0.7928	0.8554	0.3944	0.6315	0.6255	0.7037	0.5095	0.7737	0.7141
	261		Leucine, Isoleucine and Valine Metabolism	leucine	LC/MS pos early	60	C00123	HMDB00687	6106		1.73	0.62	0.72	0.36	0.42	1.17	1.19	1.06	0.83	0.89	0.7	0.79	1.12	0.77	1.92	1.3					0.0105	0.0118	0.1118	0.2146	0.3426	0.8454	0.0001	0.0002	0.0008	0.0012	0.5094	0.8178	0.4968	0.6496	0.8578	0.7598	0.4048	0.7458	0.616
	262			N-acetylleucine	LC/MS neg	1587	C02710	HMDB11756	70912		5.18	0.58	1.33	0.11	0.26	2.3	1.55	0.25	0.49	0.16	0.32	1.98	2.25	0.67	0.97	0.84					0.0019	0.0035	0.2396	0.2756	0.6403	0.8871	5.276e-05	0.0001	0.0067	0.0067	0.1038	0.7342	0.894	0.7311	0.0193	0.2763	0.2641	0.7007	0.0139
	263			1-carboxyethylleucine	LC/MS neg	62559					2.78	0.49	0.32	0.17	0.11	0.65	1.73	1.29	0.82	0.74	0.48	0.64	1.05	0.65	2.79	2.75					0.0048	0.0065	0.2365	0.2756	0.0476	0.5877	0.0001	0.0003	1.0619e-05	8.9735e-05	0.4047	0.7603	0.1793	0.5138	0.5573	0.6897	0.4686	0.7737	0.4428
	265			4-methyl-2-oxopentanoate	LC/MS neg	22116	C00233	HMDB00695	70		0.85	0.97	1.52	1.14	1.79	1.57	0.84	0.74	0.75	0.89	0.89	1	0.83	0.82	0.64	0.41					0.1683	0.0953	0.9405	0.5145	0.6516	0.8871	0.1917	0.0955	0.0705	0.0394	0.599	0.8385	0.397	0.6315	0.5233	0.6828	0.6321	0.797	0.833
	272			isovalerylglycine	LC/MS neg	35107		HMDB00678	546304		9.19	0.56	1.61	0.06	0.18	2.86	0.07	0.02	0.03	0.33	0.42	1.25	25.58	0.2	1.09	0.48					0.018	0.0172	0.5269	0.3875	0.4835	0.8649	0.0035	0.0034	0.0859	0.0466	0.186	0.7603	0.1216	0.4772	0.0225	0.2939	0.0371	0.3344	0.4332
	273			isovalerylcarnitine (C5)	LC/MS pos early	34407		HMDB00688	6426851		1.81	1.11	0.96	0.61	0.53	0.87	1.57	0.78	1.11	0.49	0.71	1.43	1.31	1.14	0.91	1.52					0.0933	0.0633	0.5851	0.4077	0.8786	0.9027	0.2494	0.119	0.1254	0.0633	0.6937	0.8461	0.6717	0.6741	0.5874	0.6959	0.7461	0.8056	0.3359
	280			beta-hydroxyisovalerate	LC/MS polar	12129		HMDB00754	69362		0.88	0.59	0.68	0.67	0.78	1.16	0.98	0.98	0.74	1	0.76	0.75	0.97	1.09	1.62	1.05					0.8344	0.3028	0.0781	0.1862	0.2452	0.8454	0.118	0.0633	0.3384	0.1343	0.533	0.8235	0.8135	0.7084	0.9369	0.7765	0.4647	0.7737	0.8754
	296			isoleucine	LC/MS pos early	1125	C00407	HMDB00172	6306		1.78	0.59	0.72	0.33	0.4	1.22	1.09	0.94	0.84	0.87	0.77	0.89	1.19	0.73	1.91	1.4					0.0114	0.0124	0.0708	0.1785	0.3729	0.8621	5.5799e-05	0.0001	0.001	0.0015	0.3452	0.7603	0.7488	0.6963	0.8258	0.7593	0.4384	0.7558	0.5895
	298			N-acetylisoleucine	LC/MS neg	33967		HMDB61684	2802421		5.33	0.48	0.92	0.09	0.17	1.93	1.18	0.48	0.6	0.41	0.51	1.25	1.72	0.38	1.73	1.12					0.0003	0.0011	0.051	0.1605	0.5566	0.8871	6.0828e-07	1.8281e-05	5.6743e-05	0.0002	0.1637	0.7603	0.9963	0.7488	0.0855	0.4524	0.2256	0.6744	0.0864
	299			1-carboxyethylisoleucine	LC/MS neg	62558					2.85	0.43	0.25	0.15	0.09	0.59	1.64	1.2	0.9	0.73	0.55	0.76	0.97	0.56	2.72	3.49					0.0036	0.0054	0.1812	0.2515	0.0261	0.4924	6.6546e-05	0.0002	3.2696e-06	4.6218e-05	0.3482	0.7603	0.2812	0.5738	0.6829	0.7066	0.5765	0.7781	0.4999
	300			3-methyl-2-oxovalerate	LC/MS neg	15676	C00671	HMDB03736	47		0.87	0.89	1.48	1.03	1.71	1.66	0.87	0.72	0.8	0.82	0.92	1.11	0.97	0.97	0.78	0.52					0.3132	0.15	0.7971	0.4645	0.5072	0.8687	0.4502	0.1867	0.0987	0.0522	0.359	0.7603	0.6703	0.6741	0.4345	0.6652	0.7009	0.798	0.7203
	301			alpha-hydroxyisovalerate	LC/MS neg	33937		HMDB00407	99823		0.45	0.26	0.53	0.57	1.19	2.08	0.25	0.25	0.18	1	0.72	0.73	2.51	1.42	2.47	0.86					0.3069	0.1481	0.0175	0.1173	0.3478	0.8455	0.1563	0.081	0.9328	0.2882	0.134	0.7378	0.0018	0.0874	0.0015	0.1161	0.0002	0.0199	0.9576
	303			2-methylbutyrylcarnitine (C5)	LC/MS pos early	45095		HMDB00378	6426901		2.07	0.82	0.97	0.4	0.47	1.17	1.34	0.41	0.96	0.31	0.71	2.33	1.83	1.19	0.91	1.81					0.0229	0.0207	0.7613	0.4595	0.9733	0.9106	0.0109	0.009	0.0248	0.0182	0.736	0.851	0.6501	0.6738	0.0284	0.3082	0.9723	0.8427	0.0094
	306			tiglylcarnitine (C5:1-DC)	LC/MS pos early	35428		HMDB02366	22833596		1.24	0.81	0.73	0.65	0.59	0.9	0.77	0.54	0.54	0.7	0.71	1.01	1.53	0.95	1.01	1.14					0.2682	0.1352	0.4702	0.3726	0.2697	0.8454	0.0714	0.0421	0.0306	0.0208	0.6984	0.8461	0.815	0.7084	0.1896	0.5607	0.1998	0.6623	0.2783
	309			3-hydroxy-2-ethylpropionate	LC/MS neg	32397		HMDB00396	188979		0.58	0.37	0.68	0.64	1.16	1.81	0.41	0.34	0.49	0.84	1.21	1.43	2.16	1.52	1.99	1.58					0.3463	0.1602	0.0629	0.1714	0.5462	0.8867	0.3427	0.1514	0.7324	0.238	0.1995	0.7603	0.0112	0.1893	0.0032	0.1713	0.0273	0.2816	0.6318
	311			ethylmalonate	LC/MS polar	15765		HMDB00622	11756		2.82	0.86	0.94	0.3	0.33	1.1	1.68	0.83	0.95	0.5	0.57	1.14	1.23	0.73	1.2	1.25					0.0003	0.0011	0.7378	0.4558	0.8075	0.8942	0.0001	0.0002	0.0002	0.0004	0.9274	0.8666	0.228	0.5472	0.5099	0.6828	0.897	0.8237	0.0661
	312			methylsuccinate	LC/MS polar	15745		HMDB01844	10349		3.95	0.65	1.12	0.16	0.28	1.74	2.49	0.58	0.76	0.23	0.31	1.31	1.14	0.72	1.03	0.77					0.0046	0.0063	0.6535	0.4371	0.6204	0.8871	0.0013	0.0015	0.0165	0.0137	0.347	0.7603	0.1745	0.5138	0.1381	0.5112	0.2696	0.7007	0.0061
	318			valine	LC/MS pos early	1649	C00183	HMDB00883	6287		1.82	0.5	0.66	0.28	0.36	1.31	1.18	0.98	0.85	0.83	0.72	0.87	1.08	0.7	2.11	1.39					0.0095	0.011	0.0397	0.1566	0.2964	0.8454	1.8951e-05	8.7593e-05	0.0005	0.0009	0.292	0.7603	0.5671	0.6611	0.8618	0.7598	0.4382	0.7558	0.4562
	319			N-acetylvaline	LC/MS neg	1591		HMDB11757	66789		1.81	0.64	0.84	0.35	0.46	1.32	1.18	0.93	0.87	0.79	0.74	0.94	1.26	0.82	1.84	1.31					0.0019	0.0035	0.1142	0.2165	0.6135	0.8871	1.443e-05	8.1314e-05	0.0004	0.0009	0.2755	0.7603	0.5016	0.6496	0.4001	0.6652	0.3686	0.7458	0.1342
	321			1-carboxyethylvaline	LC/MS neg	62562					2.15	0.44	0.26	0.2	0.12	0.59	1.55	1.17	0.87	0.76	0.56	0.74	0.93	0.67	2.5	3.18					0.0136	0.014	0.1318	0.2293	0.021	0.4915	0.0002	0.0003	1.247e-05	8.9735e-05	0.3922	0.7603	0.2991	0.5874	0.7011	0.719	0.4662	0.7737	0.5096
	323			3-methyl-2-oxobutyrate	LC/MS polar	44526	C00141	HMDB00019	49		0.74	0.72	1.55	0.97	2.1	2.16	0.76	0.38	0.43	0.5	0.57	1.13	0.93	0.96	0.5	0.26					0.177	0.0988	0.4296	0.3605	0.4732	0.8649	0.5677	0.217	0.0422	0.0265	0.1359	0.7378	0.6004	0.6636	0.0692	0.427	0.0928	0.4637	0.1881
	324			2-hydroxy-3-methylvalerate	LC/MS neg	36746		HMDB00317	164623		1.33	0.49	0.54	0.37	0.41	1.11	0.28	0.25	0.25	0.91	0.92	1.02	2.06	0.43	1.05	0.96					0.8686	0.3094	0.0753	0.1825	0.214	0.8337	0.0532	0.0331	0.1608	0.077	0.5763	0.8385	0.0035	0.1215	0.0016	0.1161	0.0016	0.0515	0.7775
	326			isobutyrylcarnitine (C4)	LC/MS pos early	33441		HMDB00736	168379		0.92	0.85	1.08	0.93	1.17	1.26	1.28	0.44	1.11	0.34	0.87	2.53	1.47	2.04	0.76	1.52					0.5304	0.2183	0.7478	0.4568	0.9183	0.9027	0.7588	0.2662	0.466	0.1715	0.6717	0.8461	0.9842	0.7488	0.0282	0.3082	0.8923	0.8231	0.0295
	328			3-hydroxyisobutyrate	LC/MS polar	1549	C06001	HMDB00336	87		0.95	0.64	0.81	0.67	0.86	1.27	1.11	0.48	0.76	0.43	0.69	1.59	1.56	1.83	1.17	1.47					0.9948	0.3399	0.0906	0.194	0.5189	0.8729	0.0918	0.0512	0.5231	0.1878	0.2851	0.7603	0.8073	0.7084	0.0242	0.2939	0.387	0.7458	0.0423
	332		Methionine, Cysteine, SAM and Taurine Metabolism	methionine	LC/MS pos early	1302	C00073	HMDB00696	6137		1.48	1.02	0.91	0.69	0.62	0.89	1.29	1.26	0.93	0.98	0.72	0.74	1.36	1.19	1.68	1.39					0.0432	0.0332	0.7243	0.4541	0.9795	0.9106	0.0909	0.0512	0.0408	0.0258	0.7052	0.8462	0.3459	0.6297	0.5082	0.6828	0.5644	0.7773	0.7761
	333			N-acetylmethionine	LC/MS neg	1589	C02712	HMDB11745	448580		1.08	0.48	0.47	0.45	0.44	0.98	1.4	1.08	0.86	0.77	0.61	0.8	1.07	1.4	2.39	1.94					0.5052	0.211	0.0461	0.1585	0.0547	0.5877	0.0094	0.0079	0.0114	0.0101	0.9374	0.8683	0.2843	0.5746	0.8675	0.7618	0.5226	0.7737	0.3645
	334			N-formylmethionine	LC/MS neg	2829	C03145	HMDB01015	439750		1.11	0.77	0.87	0.7	0.79	1.13	0.97	1.17	0.88	1.2	0.9	0.75	1.31	1.15	1.98	1.32					0.4376	0.1899	0.2706	0.2903	0.6328	0.8871	0.0645	0.0388	0.213	0.0938	0.5286	0.8193	0.8245	0.7093	0.7612	0.7367	0.5355	0.7749	0.5996
	336			methionine sulfone	LC/MS pos early	44878			69961		1.53	0.68	0.6	0.44	0.39	0.88	1.48	1	1.59	0.68	1.08	1.59	0.4	0.39	0.59	1.07					0.0837	0.0584	0.6864	0.446	0.4163	0.8649	0.0352	0.0237	0.0132	0.0114	0.6806	0.8461	0.3294	0.6131	0.9978	0.7901	0.4649	0.7737	0.3308
	337			methionine sulfoxide	LC/MS pos early	18374	C02989	HMDB02005	158980		0.62	0.58	0.59	0.94	0.95	1.02	0.51	0.63	0.4	1.24	0.78	0.63	1.52	1.26	1.67	1.04					0.3195	0.1515	0.1216	0.2218	0.1464	0.743	0.5693	0.217	0.6386	0.2167	0.9204	0.8666	0.0523	0.347	0.2005	0.5638	0.0052	0.1037	0.489
	338			N-acetylmethionine sulfoxide	LC/MS pos early	45428			193368		0.81	0.31	0.37	0.38	0.46	1.2	0.52	0.52	0.36	1	0.7	0.7	1.91	1.22	3.18	1.85					0.6298	0.2463	0.0001	0.0111	0.0035	0.2321	0.0006	0.0009	0.0125	0.0109	0.283	0.7603	0.019	0.2502	0.0345	0.3493	0.0008	0.0403	0.7999
	342			S-adenosylmethionine (SAM)	LC/MS pos early	15915	C00019	HMDB01185	34756		2.68	0.91	0.83	0.34	0.31	0.91	1.22	1.4	0.99	1.14	0.81	0.71	1.31	0.6	2.01	1.57					0.0233	0.0209	0.7925	0.463	0.5632	0.8871	0.0123	0.0096	0.0054	0.0057	0.7521	0.8554	0.7273	0.6889	0.5125	0.6828	0.7904	0.8134	0.7584
	343			S-adenosylhomocysteine (SAH)	LC/MS neg	42382	C00021	HMDB00939	439155		5.96	0.77	0.63	0.13	0.1	0.81	2.19	1.13	1.13	0.52	0.52	1	0.7	0.26	1.03	1.28					0.0002	0.0007	0.5497	0.3952	0.1823	0.8271	2.7395e-05	0.0001	2.4627e-06	3.7977e-05	0.4553	0.7775	0.0595	0.3695	0.7317	0.7271	0.6512	0.798	0.1187
	345			2,3-dihydroxy-5-methylthio-4-pentenoate (DMTPA)*	LC/MS neg	62805					1.04	0.87	0.89	0.84	0.85	1.02	0.62	0.67	0.49	1.08	0.8	0.74	1.35	0.8	1.04	0.76					0.5182	0.2144	0.5189	0.3851	0.8376	0.8989	0.2001	0.0991	0.3959	0.1511	0.6591	0.8461	0.251	0.5493	0.1251	0.5032	0.0232	0.2698	0.6902
	349			cystathionine	LC/MS pos early	15705	C02291	HMDB00099	439258		6.31	2.32	1.43	0.37	0.23	0.62	4.18	1.04	2.54	0.25	0.61	2.45	1.28	0.85	0.58	2.28					0.0104	0.0117	0.5182	0.3851	0.7712	0.8871	0.0481	0.0304	0.0212	0.0163	0.7214	0.851	0.0945	0.4538	0.5746	0.6931	0.6095	0.7874	0.0281
	351			cysteine	LC/MS pos early	1868	C00097	HMDB00574	5862		1.24	0.79	0.97	0.64	0.79	1.23	5.54	0.99	1.5	0.18	0.27	1.51	0.84	3.77	1.05	1.29					0.3903	0.1755	0.7342	0.455	0.9214	0.9027	0.2332	0.1118	0.3389	0.1343	0.8096	0.8554	0.0867	0.4413	0.7043	0.7192	0.537	0.7749	0.0386
	353			S-methylcysteine	LC/MS pos early	39592		HMDB02108	24417		1.97	1.22	1.09	0.62	0.55	0.9	1.33	1.09	1.14	0.82	0.86	1.05	2.07	1.4	1.86	2.17					0.0327	0.0272	0.9292	0.5125	0.7238	0.8871	0.0266	0.0184	0.0706	0.0394	0.6585	0.8461	0.563	0.6611	0.8448	0.7598	0.8549	0.8189	0.7014
	354			S-methylcysteine sulfoxide	LC/MS pos early	43378		HMDB29432	82142		0.57	1.44	0.94	2.51	1.63	0.65	1.63	1.88	2.34	1.15	1.44	1.24	1.11	3.15	1.45	2.77					0.5216	0.2154	0.9889	0.5249	0.8648	0.9027	0.5307	0.2066	0.4183	0.1577	0.8538	0.8554	0.2635	0.5649	0.0824	0.4411	0.0778	0.4553	0.5211
	357			cystine	LC/MS pos early	56	C00491	HMDB00192	67678		0.16	0.15	1.38	0.93	8.6	9.26	10.46	0.35	0.43	0.03	0.04	1.22	0.96	62.89	2.25	0.3					0.0391	0.0313	0.0645	0.1714	0.7492	0.8871	0.8176	0.2819	0.0776	0.0425	0.1222	0.7378	0.9688	0.7468	0.0561	0.3894	0.131	0.5546	0.0516
	360			lanthionine	LC/MS pos early	42002			98504		6.47	2.34	7.29	0.36	1.13	3.11	41.69	25.96	11.24	0.62	0.27	0.43	0.44	2.86	4.93	0.69					0.05	0.0375	0.8704	0.4911	0.4537	0.8649	0.0707	0.0418	0.2135	0.0938	0.5569	0.8385	0.0063	0.1823	0.3455	0.6484	0.0869	0.4637	0.0612
	362			cysteine sulfinic acid	LC/MS pos early	37443	C00606	HMDB00996	109		5.87	1.85	1.19	0.32	0.2	0.64	5.21	0.75	2.26	0.14	0.43	3.03	0.97	0.86	0.39	1.84					0.0028	0.0046	0.3246	0.3133	0.5756	0.8871	0.0347	0.0236	0.0124	0.0109	0.6674	0.8461	0.0078	0.1823	0.8774	0.7665	0.1257	0.5371	0.0052
	363			hypotaurine	LC/MS polar	590	C00519	HMDB00965	107812		0.93	1.03	1	1.11	1.08	0.97	3.22	1.48	2	0.46	0.62	1.36	0.6	2.07	0.86	1.2					0.3564	0.1637	0.3516	0.3268	0.3687	0.86	0.9924	0.3196	0.9811	0.2981	0.9736	0.8784	0.0235	0.2502	0.5561	0.6897	0.1574	0.6118	0.0858
	364			taurine	LC/MS neg	2125	C00245	HMDB00251	1123		1.71	1.04	0.78	0.61	0.46	0.75	1.14	0.83	0.91	0.73	0.8	1.11	1.11	0.74	0.89	1.3					0.0088	0.0104	0.8114	0.4694	0.2702	0.8454	0.016	0.012	0.0004	0.0008	0.182	0.7603	0.6434	0.6738	0.2916	0.6103	0.6486	0.798	0.1326
	365			N-acetyltaurine	LC/MS neg	48187			159864		1.46	0.68	0.96	0.46	0.65	1.41	0.92	0.74	0.77	0.8	0.83	1.04	1.05	0.66	1.14	0.84					0.0163	0.0163	0.1568	0.2439	0.9098	0.9027	0.0003	0.0005	0.0215	0.0164	0.1274	0.7378	0.748	0.6963	0.1291	0.5032	0.2061	0.6623	0.2274
	367			taurocyamine	LC/MS pos early	35117	C01959	HMDB03584	68340		3.51	1.03	0.92	0.29	0.26	0.9	1.66	1.05	1.12	0.63	0.68	1.07	1.09	0.51	1.11	1.32					0.0006	0.0015	0.7264	0.4541	0.9289	0.9027	0.0015	0.0017	0.0007	0.0012	0.7942	0.8554	0.4906	0.6496	0.9944	0.7901	0.7793	0.8134	0.4949
	371		Urea cycle; Arginine and Proline Metabolism	arginine	LC/MS pos early	1638	C00062	HMDB00517	232		0.45	1.1	1.06	2.47	2.38	0.96	0.83	1.52	0.62	1.82	0.74	0.41	1.54	2.88	2.12	0.9					0.0015	0.0031	0.773	0.4595	0.7176	0.8871	0.0007	0.0009	0.0005	0.001	0.9415	0.8683	0.2709	0.5703	0.5339	0.6828	0.5736	0.7773	0.0889
	372			argininosuccinate	LC/MS pos early	15497	C03406	HMDB00052	828		0.7	0.78	0.54	1.12	0.78	0.7	1.84	1.92	1.43	1.04	0.78	0.75	0.8	2.1	1.95	2.09					0.1141	0.0718	0.6944	0.4482	0.3073	0.8454	0.2297	0.1108	0.5644	0.1974	0.5268	0.8193	0.5438	0.6611	0.1708	0.5607	0.4184	0.7458	0.4387
	373			urea	LC/MS pos early	1670	C00086	HMDB00294	1176		0.96	0.6	0.75	0.62	0.78	1.25	0.77	0.75	0.73	0.98	0.95	0.97	1.14	0.92	1.44	1.12					0.6101	0.2411	0.0746	0.1824	0.4914	0.8649	0.0241	0.0169	0.2339	0.0992	0.2626	0.7603	0.4745	0.6496	0.4275	0.6652	0.3428	0.745	0.9368
	375			ornithine	LC/MS pos early	1493	C00077	HMDB03374	6262		1.78	0.43	0.84	0.24	0.47	1.94	1.17	0.76	0.82	0.65	0.7	1.08	1.01	0.67	1.78	0.99					0.0641	0.0468	0.0101	0.0984	0.4056	0.8649	4.1394e-05	0.0001	0.009	0.0083	0.0703	0.7068	0.6625	0.6741	0.3498	0.6502	0.5209	0.7737	0.1735
	379			2-oxoarginine*	LC/MS pos early	55072	C03771	HMDB04225	558		2.68	0.84	0.81	0.31	0.3	0.96	0.93	0.93	0.62	1	0.66	0.66	1.14	0.39	1.26	0.87					0.0006	0.0016	0.2129	0.2673	0.3868	0.8649	1.2614e-05	7.9218e-05	4.336e-05	0.0001	0.6981	0.8461	0.7199	0.6877	0.8201	0.7571	0.0538	0.3982	0.8954
	380			citrulline	LC/MS pos early	2132	C00327	HMDB00904	9750		1.02	1.01	1.08	0.99	1.06	1.07	1.17	0.84	0.86	0.72	0.74	1.02	1.18	1.35	0.99	0.94					0.8973	0.3179	0.9338	0.5133	0.7598	0.8871	0.8321	0.283	0.8597	0.2721	0.6976	0.8461	0.6383	0.6738	0.4194	0.6652	0.5377	0.7749	0.734
	382			homocitrulline	LC/MS pos early	22138	C02427	HMDB00679	65072		2.18	1.13	0.82	0.52	0.38	0.73	3.33	1.77	1.75	0.53	0.52	0.99	0.76	1.15	1.19	1.61					0.1571	0.0911	0.5396	0.391	0.8052	0.8942	0.4152	0.177	0.0987	0.0522	0.3911	0.7603	0.4621	0.6496	0.2609	0.5994	0.3471	0.745	0.6929
	383			proline	LC/MS pos early	1898	C00148	HMDB00162	145742		1.13	0.6	0.72	0.53	0.63	1.18	1.23	1.35	0.79	1.1	0.65	0.59	1	1.09	2.24	1.11					0.3213	0.152	0.0919	0.1941	0.2537	0.8454	0.0093	0.0079	0.0366	0.0242	0.5727	0.8385	0.4952	0.6496	0.4639	0.68	0.2864	0.7184	0.9595
	386			dimethylarginine (SDMA + ADMA)	LC/MS pos early	36808	C03626	HMDB01539	123831		1.09	0.47	0.44	0.43	0.41	0.95	1.56	1.49	0.86	0.96	0.55	0.58	0.85	1.21	2.69	1.64					0.4938	0.2076	0.0447	0.1585	0.0939	0.6574	0.0086	0.0075	0.0208	0.0162	0.7227	0.851	0.2272	0.5472	0.4238	0.6652	0.6162	0.7896	0.6779
	387			N-acetylarginine	LC/MS pos early	33953	C02562	HMDB04620	67427		0.89	0.71	1.51	0.79	1.69	2.13	4.05	0.99	1.04	0.24	0.26	1.06	0.88	3.98	1.23	0.61					0.7878	0.2909	0.6605	0.4378	0.5148	0.8711	0.4797	0.1939	0.7013	0.2306	0.278	0.7603	0.1432	0.4971	0.9596	0.7866	0.7283	0.8006	0.1304
	390			N-acetylcitrulline	LC/MS neg	48434	C15532	HMDB00856	656979		6.14	0.36	1.71	0.06	0.28	4.81	7.34	0.17	0.17	0.02	0.02	0.95	2.37	2.83	1.15	0.23					0.1274	0.0771	0.2633	0.2903	0.5713	0.8871	0.0103	0.0086	0.33	0.132	0.0959	0.7325	0.5887	0.6632	0.1919	0.5609	0.1888	0.6487	0.0685
	393			N-alpha-acetylornithine	LC/MS pos early	32984	C00437	HMDB03357	439232		14	0.79	2.02	0.06	0.14	2.55	2.9	0.41	0.25	0.14	0.09	0.62	1.99	0.41	1.02	0.25					0.0007	0.0016	0.4946	0.3778	0.3336	0.8454	8.2132e-05	0.0002	0.0097	0.0089	0.1031	0.7342	0.2304	0.5472	0.189	0.5607	0.1029	0.4784	0.0146
	397			trans-4-hydroxyproline	LC/MS pos early	32306	C01157	HMDB00725	5810		0.37	0.44	0.64	1.18	1.74	1.48	0.79	1.48	0.96	1.88	1.22	0.65	0.79	1.69	2.7	1.19					0.0005	0.0014	0.1034	0.2077	0.3445	0.8454	0.0409	0.0262	0.0074	0.0072	0.4818	0.8018	0.9938	0.7488	0.2253	0.5781	0.6478	0.798	0.2225
	399			pro-hydroxy-pro	LC/MS pos early	35127		HMDB06695	11673055		0.27	0.32	0.58	1.2	2.14	1.78	0.48	1.17	0.65	2.42	1.35	0.56	0.8	1.43	2.88	0.9					0.0076	0.0094	0.0454	0.1585	0.4168	0.8649	0.4605	0.19	0.0534	0.0317	0.2203	0.7603	0.3756	0.6315	0.5251	0.6828	0.8128	0.8152	0.1321
	402			N-methylproline	LC/MS pos early	37431			557		1.14	0.96	0.89	0.84	0.78	0.93	2.4	1.48	0.67	0.62	0.28	0.45	0.81	1.7	1.25	0.61					0.8222	0.3002	0.8672	0.4911	0.6319	0.8871	0.6953	0.2488	0.4825	0.1749	0.7549	0.8554	0.1097	0.4657	0.263	0.5994	0.5253	0.7737	0.6195
	404			N-monomethylarginine	LC/MS pos early	43586	C03884	HMDB29416	132862		1.05	0.63	0.57	0.6	0.54	0.9	1.39	1.41	0.9	1.01	0.65	0.64	0.88	1.17	1.98	1.41					0.5429	0.2208	0.1642	0.244	0.1924	0.8271	0.049	0.0309	0.0595	0.0343	0.9277	0.8666	0.3611	0.6315	0.4359	0.6652	0.6693	0.798	0.8919
	405			argininate*	LC/MS pos early	57461		HMDB03148	160437		29.82	0.87	0.87	0.03	0.03	0.99	5.01	0.61	0.58	0.12	0.12	0.96	1.6	0.27	1.12	1.08					4.8306e-05	0.0003	0.8432	0.4794	0.8375	0.8989	2.5842e-05	0.0001	2.5245e-05	0.0001	0.9941	0.8797	0.5022	0.6496	0.4888	0.6828	0.4605	0.7737	0.1765
	408			N-acetylhomocitrulline	LC/MS pos early	62707					5.63	0.38	0.93	0.07	0.17	2.48	6.18	0.28	0.34	0.05	0.05	1.21	2.04	2.25	1.53	0.74					0.0431	0.0332	0.3726	0.3328	0.9638	0.9074	0.0047	0.0045	0.0476	0.029	0.3491	0.7603	0.5075	0.65	0.3383	0.645	0.417	0.7458	0.1093
	409			dimethylguanidino valeric acid (DMGV)*	LC/MS pos early	62783					0.17	0.19	0.3	1.12	1.78	1.59	0.12	0.1	0.08	0.84	0.67	0.81	1.49	1.07	0.8	0.4					0.0041	0.006	0.0091	0.0974	0.0762	0.6384	0.7636	0.2669	0.2282	0.0981	0.3625	0.7603	2.3304e-06	0.001	1.2059e-06	0.0005	3.3839e-07	0.0002	0.8394
	410		Creatine Metabolism	guanidinoacetate	LC/MS pos early	43802	C00581	HMDB00128	763		0.87	0.63	1.42	0.72	1.64	2.27	7.2	2.38	1.43	0.33	0.2	0.6	0.75	6.24	2.85	0.75					0.747	0.2807	0.3617	0.3291	0.6983	0.8871	0.5533	0.2136	0.4786	0.1739	0.1967	0.7603	0.0074	0.1823	0.0653	0.4097	0.3012	0.7314	0.3596
	411			creatine	LC/MS pos early	27718	C00300	HMDB00064	586		0.56	1.06	0.87	1.89	1.55	0.82	0.75	0.94	0.8	1.25	1.07	0.86	1.29	1.73	1.14	1.2					0.0111	0.0123	0.9969	0.5253	0.6868	0.8871	0.011	0.009	0.0295	0.0205	0.684	0.8461	0.2371	0.5472	0.808	0.7543	0.4751	0.7737	0.345
	412			creatinine	LC/MS pos early	513	C00791	HMDB00562	588		0.66	0.95	0.89	1.45	1.36	0.94	0.86	0.99	0.79	1.15	0.91	0.8	1.25	1.64	1.29	1.1					0.0869	0.0605	0.638	0.4307	0.8483	0.8989	0.2075	0.102	0.126	0.0634	0.7797	0.8554	0.5871	0.6632	0.9707	0.7873	0.5068	0.7737	0.5622
	413			creatine phosphate	LC/MS polar	33951	C02305	HMDB01511	587		0.3	0.41	0.98	1.38	3.3	2.39	0.34	1.11	1.93	3.23	5.63	1.74	0.76	0.88	2.07	1.5					0.04	0.0316	0.2402	0.2756	0.9199	0.9027	0.3577	0.1569	0.0319	0.0215	0.2033	0.7603	0.4129	0.6315	0.4422	0.6652	0.0718	0.4418	0.1167
	418		Polyamine Metabolism	putrescine	LC/MS pos early	1408	C00134	HMDB01414	1045		0.62	0.95	1.06	1.52	1.7	1.11	0.82	1.28	1.42	1.56	1.73	1.11	1.49	1.96	2	2					0.3512	0.1617	0.6719	0.4401	0.9598	0.9053	0.6083	0.2266	0.3262	0.1308	0.6357	0.8461	0.6063	0.6636	0.5661	0.6897	0.5691	0.7773	0.2787
	420			N-acetyl-isoputreanine*	LC/MS pos early	62309					3.15	0.86	1.22	0.27	0.39	1.42	0.5	0.15	0.11	0.3	0.22	0.73	9.86	1.55	1.7	0.88					0.0062	0.008	0.6662	0.4387	0.4613	0.8649	0.0019	0.002	0.0379	0.0245	0.2456	0.7603	0.5366	0.659	0.0122	0.2763	0.0014	0.0469	0.0523
	421			spermidine	LC/MS pos early	485	C00315	HMDB01257	1102		0.97	0.55	0.98	0.56	1	1.79	1.29	3.3	1.1	2.57	0.86	0.33	0.97	1.28	5.86	1.1					0.5373	0.2192	0.2441	0.2776	0.8611	0.9027	0.0787	0.0455	0.6579	0.2219	0.182	0.7603	0.5187	0.6579	0.1127	0.5032	0.7902	0.8134	0.3376
	423			N('1)-acetylspermidine	LC/MS pos early	57689	C00612	HMDB01276	496		1.03	0.52	0.74	0.5	0.72	1.42	0.69	0.6	0.54	0.87	0.77	0.89	2.11	1.42	2.46	1.54					0.2829	0.14	0.363	0.3291	0.6936	0.8871	0.0514	0.032	0.1453	0.0706	0.6036	0.8385	0.5634	0.6611	0.4002	0.6652	0.1997	0.6623	0.7903
	426			spermine	LC/MS pos late	603	C00750	HMDB01256	1103		0.61	0.46	3.14	0.75	5.15	6.85	0.9	28.81	3.3	31.9	3.65	0.11	0.65	0.96	40.71	0.68					0.7042	0.2693	0.4012	0.3488	0.6007	0.8871	0.6436	0.2363	0.3683	0.143	0.1764	0.7603	0.9901	0.7488	0.0171	0.2763	0.1902	0.6487	0.0176
	429			5-methylthioadenosine (MTA)	LC/MS pos early	1419	C00170	HMDB01173	439176		2.46	1.13	1.55	0.46	0.63	1.37	1.42	1.55	1.63	1.09	1.15	1.05	0.98	0.57	1.35	1.03					0.0371	0.0301	0.7537	0.458	0.4921	0.8649	0.0178	0.0132	0.1512	0.0733	0.3189	0.7603	0.4999	0.6496	0.3234	0.6313	0.3726	0.7458	0.7514
	430			N-acetylputrescine	LC/MS pos early	37496	C02714	HMDB02064	122356		0.47	1.44	1.33	3.03	2.8	0.92	0.69	1.03	1.67	1.51	2.43	1.61	2.09	3.02	1.5	2.62					0.044	0.0335	0.9616	0.5186	0.7289	0.8871	0.0395	0.0255	0.0197	0.0156	0.7653	0.8554	0.7148	0.6877	0.772	0.7439	0.555	0.7773	0.5133
	439		Guanidino and Acetamido Metabolism	4-guanidinobutanoate	LC/MS pos early	15681	C01035	HMDB03464	500		43.21	3.84	1.62	0.09	0.04	0.42	1.51	1.4	0.58	0.92	0.38	0.42	1.22	0.04	0.44	0.44					1.5512e-07	1.7325e-05	0.0039	0.0734	0.1226	0.6884	0.0021	0.0022	2.4801e-05	0.0001	0.1453	0.7406	0.4347	0.6455	0.6365	0.7037	0.2023	0.6623	0.7561
	442		Glutathione Metabolism	glutathione, reduced (GSH)	LC/MS pos early	2127	C00051	HMDB00125	124886		18.65	1.94	1.1	0.1	0.06	0.57	5.08	2.34	2.23	0.46	0.44	0.95	1.08	0.29	1.3	2.18					0.0017	0.0033	0.3651	0.3291	0.3394	0.8454	0.0189	0.0137	9.7398e-05	0.0003	0.067	0.7068	0.2285	0.5472	0.3285	0.6345	0.691	0.798	0.8162
	443			glutathione, oxidized (GSSG)	LC/MS pos early	27727	C00127	HMDB03337	65359		2.59	0.85	0.69	0.33	0.27	0.81	1.92	1.47	1.1	0.77	0.57	0.75	1.03	0.76	1.79	1.64					0.0328	0.0272	0.7471	0.4568	0.3269	0.8454	0.0152	0.0115	0.0027	0.0033	0.5081	0.8178	0.6163	0.671	0.2309	0.5781	0.6084	0.7874	0.4809
	445			cysteine-glutathione disulfide	LC/MS pos early	35159		HMDB00656	4247235		0.45	0.35	0.77	0.79	1.72	2.19	0.77	0.55	0.52	0.71	0.67	0.94	1.16	2.01	1.82	0.78					0.1858	0.1022	0.0261	0.1379	0.4191	0.8649	0.3409	0.1512	0.5992	0.2069	0.1431	0.7406	0.4588	0.6496	0.0655	0.4097	0.0984	0.4685	0.2587
	446			S-methylglutathione	LC/MS neg	33944	C11347		3605667		39.17	1.28	0.67	0.03	0.02	0.52	22.11	1.1	1.32	0.05	0.06	1.2	0.88	0.5	0.76	1.74					4.7963e-05	0.0003	0.5198	0.3851	0.717	0.8871	0.0004	0.0005	1.5164e-05	9.1556e-05	0.3165	0.7603	0.1564	0.5061	0.8619	0.7598	0.8567	0.8189	0.2116
	447			S-lactoylglutathione	LC/MS neg	15731	C03451	HMDB01066	440018		1.68	0.62	0.24	0.37	0.14	0.39	3.03	3.33	2.3	1.1	0.76	0.69	0.48	0.87	2.61	4.62					0.1099	0.0698	0.9924	0.525	0.2361	0.8454	0.112	0.0607	0.0071	0.007	0.2325	0.7603	0.2714	0.5703	0.1846	0.5607	0.1654	0.6376	0.8156
	448			cysteinylglycine	LC/MS pos early	35637	C01419	HMDB00078	439498		7.72	1.1	1.25	0.14	0.16	1.13	2.26	0.91	1.35	0.41	0.6	1.48	1.3	0.38	1.08	1.4					0.0112	0.0123	0.9631	0.5186	0.8657	0.9027	0.01	0.0083	0.017	0.014	0.8295	0.8554	0.2203	0.5472	0.8997	0.7741	0.5777	0.7781	0.27
	451			5-oxoproline	LC/MS neg	1494	C01879	HMDB00267	7405		1.4	0.73	1.17	0.52	0.84	1.6	2.45	1.05	1.45	0.43	0.59	1.38	0.89	1.57	1.28	1.1					0.1812	0.1	0.3882	0.3405	0.9512	0.9027	0.0312	0.0214	0.2013	0.0899	0.3559	0.7603	0.0644	0.3779	0.8779	0.7665	0.4013	0.7458	0.0883
	454			2-hydroxybutyrate/2-hydroxyisobutyrate	LC/MS polar	52281					11.82	0.66	0.81	0.06	0.07	1.24	0.58	0.15	0.19	0.26	0.33	1.26	4.73	0.23	1.1	1.12					3.994e-05	0.0003	0.4891	0.3755	0.868	0.9027	4.334e-06	4.6029e-05	2.3589e-05	0.0001	0.5983	0.8385	0.1853	0.5149	0.0041	0.1779	0.0166	0.2223	0.0978
	456			ophthalmate	LC/MS pos early	34592		HMDB05765	7018721		9.78	1.23	0.89	0.13	0.09	0.72	1.53	0.9	0.47	0.59	0.31	0.52	2.32	0.36	1.7	1.23					0.0006	0.0015	0.8055	0.4678	0.5451	0.8867	0.0012	0.0014	9.1488e-05	0.0003	0.3959	0.7603	0.8233	0.7093	0.6546	0.7054	0.3355	0.745	0.5033
	459			4-hydroxy-nonenal-glutathione	LC/MS neg	48487					1.48	1.19	1.03	0.8	0.69	0.87	0.66	0.88	0.38	1.33	0.58	0.43	2.84	1.27	2.12	1.06					0.1698	0.0958	0.5359	0.3909	0.839	0.8989	0.4436	0.1852	0.1169	0.0595	0.412	0.7603	0.4469	0.6496	0.8427	0.7598	0.0373	0.3344	0.3389
	460			3'-dephospho-CoA-glutathione*	LC/MS neg	62807					5.4	1.13	0.78	0.21	0.14	0.68	2.73	1.27	1.15	0.47	0.42	0.9	0.95	0.48	1.06	1.4					0.0061	0.008	0.6642	0.4383	0.6207	0.8871	0.0184	0.0135	0.0016	0.0022	0.3548	0.7603	0.3837	0.6315	0.5438	0.6843	0.6752	0.798	0.7898
	461			CoA-glutathione*	LC/MS neg	62804	C00920		11953788		4.5	1.21	0.98	0.27	0.22	0.81	3.06	1.77	2.04	0.58	0.67	1.15	0.57	0.39	0.84	1.2					0.0153	0.0154	0.5264	0.3875	0.4874	0.8649	0.0654	0.0392	0.0024	0.0031	0.1878	0.7603	0.2161	0.5472	0.2162	0.5696	0.0929	0.4637	0.9999
	465	Peptide	Gamma-glutamyl Amino Acid	gamma-glutamylalanine	LC/MS pos early	37063		HMDB29142	440103		0.36	0.58	1.35	1.62	3.76	2.31	1.13	0.31	0.87	0.27	0.77	2.83	0.85	2.68	0.45	0.55					0.2116	0.1127	0.6557	0.4376	0.6459	0.8871	0.4169	0.1773	0.0909	0.0491	0.3672	0.7603	0.6784	0.6741	0.0585	0.3962	0.4008	0.7458	0.134
	467			gamma-glutamylglutamate	LC/MS pos early	36738	C05282	HMDB11737	92865		0.95	0.76	0.84	0.79	0.88	1.11	1.33	0.88	1.59	0.66	1.19	1.81	0.67	0.93	0.77	1.26					0.6764	0.2618	0.5129	0.3851	0.6595	0.8871	0.2863	0.132	0.3925	0.1509	0.8298	0.8554	0.3704	0.6315	0.992	0.7897	0.3287	0.745	0.3757
	468			gamma-glutamylglutamine	LC/MS pos early	2730	C05283	HMDB11738	150914		0.42	0.65	1.29	1.58	3.11	1.98	0.92	0.46	1.32	0.5	1.44	2.85	0.84	1.86	0.59	0.86					0.0211	0.0196	0.4427	0.3619	0.7301	0.8871	0.112	0.0607	0.009	0.0083	0.2683	0.7603	0.5111	0.6502	0.0759	0.4378	0.8027	0.8149	0.2532
	469			gamma-glutamylglycine	LC/MS pos early	33949		HMDB11667	165527		0.64	0.68	1.48	1.05	2.3	2.18	2.5	1.36	2.2	0.54	0.88	1.61	0.68	2.66	1.37	1.01					0.2531	0.1306	0.5876	0.4077	0.721	0.8871	0.5435	0.2103	0.1366	0.0674	0.3702	0.7603	0.5899	0.6632	0.9047	0.7741	0.3095	0.7314	0.5106
	470			gamma-glutamylhistidine	LC/MS pos early	18245			7017195		0.64	0.48	1.41	0.75	2.21	2.94	2.59	0.61	1.19	0.24	0.46	1.96	0.9	3.63	1.13	0.76					0.4683	0.1998	0.2333	0.2756	0.7688	0.8871	0.6353	0.2343	0.3101	0.1258	0.1399	0.7378	0.5216	0.659	0.2899	0.6103	0.9764	0.8427	0.0933
	471			gamma-glutamylisoleucine*	LC/MS pos early	34456		HMDB11170	14253342		1.58	0.49	1.21	0.31	0.77	2.46	1.63	0.55	0.83	0.34	0.51	1.5	1.29	1.33	1.44	0.88					0.1011	0.0667	0.0453	0.1585	0.8694	0.9027	0.0006	0.0008	0.1383	0.0678	0.0313	0.6723	0.4545	0.6496	0.1483	0.5356	0.5009	0.7737	0.0315
	472			gamma-glutamylleucine	LC/MS pos early	18369		HMDB11171	151023		2.4	0.55	1.03	0.23	0.43	1.85	1.33	0.55	0.66	0.41	0.5	1.22	1.4	0.78	1.39	0.91					0.0126	0.0131	0.174	0.2497	0.9506	0.9027	0.0003	0.0004	0.0147	0.0126	0.1558	0.7603	0.4533	0.6496	0.3428	0.6479	0.4166	0.7458	0.0936
	473			gamma-glutamyl-alpha-lysine	LC/MS pos early	55015			65254		0.4	0.35	1.11	0.88	2.77	3.15	0.9	0.49	0.52	0.55	0.58	1.05	1.21	2.71	1.71	0.57					0.1081	0.069	0.028	0.1404	0.7723	0.8871	0.5281	0.2065	0.1839	0.0845	0.0536	0.7068	0.1812	0.5138	0.1767	0.5607	0.1871	0.6487	0.9884
	474			gamma-glutamyl-epsilon-lysine	LC/MS pos early	33934		HMDB03869	7015685		0.56	0.38	0.38	0.69	0.69	1	0.94	1.06	0.62	1.13	0.66	0.59	0.87	1.48	2.41	1.42					0.372	0.1693	0.037	0.1548	0.1911	0.8271	0.2169	0.1063	0.6717	0.223	0.4127	0.7603	0.9733	0.7479	0.9888	0.7897	0.5259	0.7737	0.9845
	475			gamma-glutamylmethionine	LC/MS pos early	44872		HMDB29155	7009567		0.61	0.89	2.13	1.45	3.48	2.39	0.99	0.25	0.7	0.25	0.71	2.79	1.9	3.06	0.54	0.62					0.2721	0.1364	0.7526	0.458	0.29	0.8454	0.1602	0.0828	0.0347	0.023	0.4548	0.7775	0.713	0.6877	0.0504	0.3894	0.5635	0.7773	0.1074
	476			gamma-glutamylphenylalanine	LC/MS pos early	33422		HMDB00594	111299		0.83	0.49	0.86	0.59	1.04	1.75	1.05	0.48	0.66	0.46	0.62	1.35	1.31	1.66	1.29	0.99					0.9306	0.3255	0.2164	0.2676	0.7055	0.8871	0.1866	0.094	0.6422	0.2174	0.3866	0.7603	0.7674	0.6975	0.1305	0.5032	0.2686	0.7007	0.2199
	477			gamma-glutamylthreonine	LC/MS pos early	33364		HMDB29159	76078708		0.83	0.68	1.17	0.82	1.41	1.72	2.54	0.82	1.17	0.32	0.46	1.41	0.82	2.51	0.99	0.82					0.773	0.2876	0.2806	0.292	0.9344	0.9027	0.4265	0.1797	0.8366	0.2673	0.3181	0.7603	0.188	0.5192	0.7846	0.7467	0.8114	0.8152	0.1143
	478			gamma-glutamyltryptophan	LC/MS pos early	33947		HMDB29160	3989307		0.51	0.68	1.03	1.34	2.03	1.52	1.25	0.6	0.83	0.48	0.66	1.38	1.16	2.84	1.03	0.93					0.0253	0.0222	0.3282	0.3137	0.6417	0.8871	0.1895	0.0949	0.0709	0.0394	0.6053	0.8385	0.7698	0.6975	0.4277	0.6652	0.7389	0.805	0.2797
	479			gamma-glutamyltyrosine	LC/MS neg	2734		HMDB11741	94340		0.4	0.43	1.1	1.08	2.74	2.55	1.33	0.23	0.35	0.18	0.26	1.49	2.22	7.38	1.2	0.7					0.0962	0.0646	0.1274	0.2269	0.7498	0.8871	0.8838	0.2935	0.1744	0.0821	0.2238	0.7603	0.4337	0.6455	0.0151	0.2763	0.0671	0.43	0.0879
	480			gamma-glutamylvaline	LC/MS pos early	43829		HMDB11172	7015683		1.56	0.52	1.12	0.33	0.72	2.14	1.77	0.52	0.87	0.29	0.49	1.68	1.2	1.36	1.19	0.93					0.118	0.0734	0.0643	0.1714	0.9134	0.9027	0.0012	0.0014	0.0956	0.0512	0.0805	0.7205	0.2893	0.5771	0.0714	0.4299	0.5357	0.7749	0.0056
	481			gamma-glutamylserine	LC/MS pos early	54914					0.54	0.53	1.15	0.99	2.12	2.14	1.32	0.53	1.17	0.4	0.89	2.23	0.94	2.3	0.93	0.96					0.0252	0.0222	0.3289	0.3137	0.9795	0.9106	0.1889	0.0949	0.0268	0.0191	0.3416	0.7603	0.9426	0.7443	0.2779	0.6103	0.8609	0.8189	0.3104
	630		Dipeptide	glycylisoleucine	LC/MS pos early	36659		HMDB28844	88079		4.78	0.59	0.46	0.12	0.1	0.79	1.56	1.5	0.2	0.96	0.13	0.13	1.57	0.51	4.02	0.67					0.0008	0.0019	0.5851	0.4077	0.4911	0.8649	0.0002	0.0003	9.8684e-05	0.0003	0.8858	0.8554	0.3432	0.6297	0.6627	0.7054	0.065	0.4283	0.6061
	631			glycylleucine	LC/MS pos early	34398	C02155	HMDB00759	92843		1.85	0.53	0.61	0.28	0.33	1.15	0.85	1.24	0.34	1.46	0.4	0.27	1.97	0.91	4.64	1.1					0.0751	0.0532	0.143	0.2388	0.3341	0.8454	0.0019	0.002	0.0077	0.0074	0.6083	0.8401	0.934	0.7402	0.9784	0.7888	0.0381	0.3344	0.9555
	641			glycylvaline	LC/MS pos early	18357		HMDB28854	97417		2.02	0.5	0.53	0.25	0.26	1.06	0.89	0.95	0.28	1.07	0.32	0.3	1.9	0.83	3.58	1					0.0432	0.0332	0.1064	0.2084	0.2067	0.8337	0.0006	0.0008	0.0017	0.0023	0.7147	0.851	0.8792	0.7268	0.7177	0.7212	0.0172	0.2223	0.608
	646			histidylalanine	LC/MS pos early	42027		HMDB28878	351667		0.74	0.78	0.72	1.04	0.96	0.92	0.83	0.75	0.23	0.89	0.28	0.31	1.99	2.23	1.91	0.65					0.7878	0.2909	0.512	0.3851	0.7947	0.8927	0.6981	0.2493	0.9929	0.2997	0.6915	0.8461	0.4142	0.6315	0.5168	0.6828	0.0101	0.1706	0.865
	665			isoleucylglycine	LC/MS neg	40008		HMDB28907	342532		1.08	0.63	0.74	0.58	0.68	1.17	0.86	1.52	0.4	1.78	0.46	0.26	2.36	1.88	5.69	1.28					0.7042	0.2693	0.265	0.2903	0.2438	0.8454	0.4589	0.1898	0.4281	0.1603	0.9583	0.8741	0.8626	0.7201	0.8215	0.7571	0.0833	0.4637	0.6903
	684			leucylglycine	LC/MS pos early	40045		HMDB28929	79070		1.09	0.89	0.95	0.82	0.88	1.07	0.86	1.1	0.48	1.29	0.56	0.43	1.83	1.44	2.26	0.92					0.4824	0.2045	0.988	0.5249	0.9337	0.9027	0.4732	0.193	0.4326	0.1613	0.9456	0.8683	0.4803	0.6496	0.8398	0.7598	0.2629	0.7007	0.6135
	733			phenylalanylalanine	LC/MS neg	41374			5488196		0.99	0.6	0.53	0.61	0.54	0.88	0.68	1.13	0.35	1.66	0.52	0.31	1.91	1.31	3.59	1.26					0.4292	0.1869	0.1349	0.2332	0.1356	0.7317	0.4713	0.1927	0.4732	0.1722	0.9976	0.8797	0.3172	0.601	0.8472	0.7598	0.0447	0.359	0.2346
	737			phenylalanylglycine	LC/MS pos early	41370		HMDB28995	98207		1.01	0.44	0.65	0.43	0.64	1.49	0.74	1.1	0.31	1.49	0.42	0.28	2.37	1.73	5.98	1.12					0.5527	0.2244	0.1046	0.2077	0.4294	0.8649	0.2947	0.1352	0.8428	0.2687	0.3937	0.7603	0.5259	0.659	0.8958	0.774	0.0594	0.419	0.4449
	756			prolylglycine	LC/MS pos early	40703		HMDB11178	6426709		1.5	0.51	0.49	0.34	0.33	0.96	1.2	1.59	0.55	1.33	0.46	0.35	1.43	1.14	4.46	1.59					0.1077	0.0689	0.1929	0.2576	0.1263	0.6884	0.005	0.0047	0.0026	0.0033	0.8138	0.8554	0.4896	0.6496	0.3966	0.6652	0.1227	0.5287	0.874
	794			threonylphenylalanine	LC/MS neg	31530		HMDB29068	4099799		1.11	1.15	0.79	1.04	0.71	0.69	0.59	0.91	0.13	1.53	0.21	0.14	3	1.61	2.37	0.48					0.9856	0.3379	0.5603	0.3989	0.6199	0.8871	0.5724	0.2177	0.6326	0.216	0.9307	0.8666	0.3363	0.6231	0.7807	0.7462	0.0045	0.1037	0.2173
	804			tryptophylglycine	LC/MS pos early	43028		HMDB29083	263471		1.26	0.71	0.94	0.57	0.74	1.31	0.79	0.92	0.29	1.17	0.37	0.32	2.57	1.61	3.31	0.81					0.6991	0.269	0.4769	0.3726	0.8446	0.8989	0.2748	0.1284	0.5608	0.1969	0.6055	0.8385	0.8696	0.7231	0.6673	0.7054	0.0162	0.2223	0.553
	820			tyrosylglycine	LC/MS neg	41375		HMDB29105	259323		0.82	0.45	0.62	0.55	0.76	1.36	0.8	1.2	0.54	1.49	0.67	0.45	1.8	1.77	4.75	1.58					0.0396	0.0315	0.0495	0.1605	0.2661	0.8454	0.9193	0.3025	0.3235	0.13	0.3747	0.7603	0.6297	0.6738	0.6706	0.7054	0.4174	0.7458	0.366
	836			valylglutamine	LC/MS pos early	42079		HMDB29125	5253209		1.44	0.44	0.41	0.31	0.29	0.93	1.79	2.6	0.38	1.46	0.21	0.15	1.19	1.48	6.96	1.09					0.1474	0.086	0.3477	0.3242	0.1195	0.6884	0.0198	0.0142	0.0039	0.0044	0.5255	0.8193	0.1959	0.5315	0.3989	0.6652	0.079	0.4567	0.6462
	837			valylglycine	LC/MS pos early	40475		HMDB29127	136487		1.42	0.39	0.56	0.27	0.39	1.45	1.5	3.05	0.38	2.03	0.25	0.12	1.56	1.65	12.38	1.07					0.2882	0.1419	0.2753	0.2907	0.3537	0.8497	0.035	0.0237	0.0507	0.0306	0.8676	0.8554	0.0817	0.4369	0.096	0.4794	0.2935	0.7286	0.936
	840			valylleucine	LC/MS pos early	39994		HMDB29131	352039		0.83	0.6	0.59	0.72	0.71	0.99	0.75	1.22	0.21	1.63	0.29	0.18	1.87	1.68	3.82	0.68					0.9665	0.3332	0.1907	0.2562	0.2942	0.8454	0.2048	0.1009	0.3135	0.1265	0.7899	0.8554	0.8384	0.716	0.7024	0.719	0.0091	0.1596	0.5584
	929		Acetylated Peptides	phenylacetylglycine	LC/MS pos early	33945	C05598	HMDB00821	68144		1.18	0.49	0.78	0.41	0.67	1.61	0.76	0.64	0.45	0.84	0.59	0.7	1.53	0.99	2.01	0.87					0.4016	0.1781	0.1757	0.2509	0.6945	0.8871	0.0317	0.0216	0.2209	0.0961	0.3315	0.7603	0.1136	0.4657	0.197	0.563	0.0473	0.3697	0.7613
	955	Carbohydrate	Glycolysis, Gluconeogenesis, and Pyruvate Metabolism	1,5-anhydroglucitol (1,5-AG)	LC/MS neg	20675	C07326	HMDB02712	64960		0.99	0.89	1.08	0.9	1.09	1.21	0.9	1.12	0.99	1.25	1.1	0.88	1.02	0.93	1.28	0.93					0.7689	0.2867	0.7905	0.463	0.6694	0.8871	0.5764	0.2183	0.8939	0.2793	0.4895	0.8041	0.3827	0.6315	0.5936	0.6982	0.9234	0.826	0.1632
	958			glucose	LC/MS polar	48152	C00031	HMDB00122	79025		14.06	0.81	1.24	0.06	0.09	1.53	4.1	0.48	1.61	0.12	0.39	3.34	0.83	0.24	0.49	1.07					0.0016	0.0032	0.6773	0.4411	0.8262	0.8989	0.0005	0.0007	0.003	0.0036	0.5257	0.8193	0.1739	0.5138	0.2378	0.5835	0.3157	0.7346	0.0136
	959			glucose 6-phosphate	LC/MS polar	31260	C00668	HMDB01401	5958		12.17	0.59	0.32	0.05	0.03	0.54	0.72	0.43	0.43	0.6	0.6	1	2.71	0.16	1.98	3.65					0.0004	0.0011	0.1869	0.2534	0.26	0.8454	5.5678e-06	4.662e-05	1.0566e-05	8.9735e-05	0.8423	0.8554	0.6798	0.6741	0.2436	0.5881	0.1777	0.6415	0.4472
	962			fructose-6-phosphate	LC/MS polar	12021	C05345	HMDB00124	69507		8.71	0.46	0.35	0.05	0.04	0.76	1.28	0.6	0.76	0.47	0.59	1.25	1.53	0.23	2	3.31					0.0006	0.0015	0.2703	0.2903	0.2811	0.8454	1.8176e-05	8.7362e-05	1.9686e-05	9.8181e-05	0.98	0.8797	0.6487	0.6738	0.6077	0.7037	0.7059	0.798	0.3347
	965			fructose 1,6-diphosphate/glucose 1,6-diphosphate/myo-inositol diphosphates	LC/MS neg	46896	C00354				0.65	0.6	0.43	0.92	0.65	0.71	0.72	0.88	0.94	1.23	1.31	1.07	1.12	1.24	1.66	2.49					0.0662	0.0479	0.194	0.2576	0.0776	0.6384	0.5734	0.2177	0.9387	0.2894	0.6266	0.8461	0.2605	0.5615	0.8678	0.7618	0.6756	0.798	0.336
	967			dihydroxyacetone phosphate (DHAP)	LC/MS pos early	15522	C00111	HMDB01473	668		1.31	0.5	0.68	0.39	0.52	1.35	0.96	0.89	0.94	0.92	0.97	1.05	1.06	0.78	1.86	1.45					0.2711	0.1363	0.0133	0.1058	0.3141	0.8454	0.0006	0.0009	0.0389	0.025	0.1239	0.7378	0.8231	0.7093	0.9271	0.7741	0.8999	0.8237	0.7528
	971			2-phosphoglycerate	LC/MS polar	35629	C00631	HMDB03391	59		0.9	0.73	0.36	0.81	0.41	0.5	0.86	0.66	0.61	0.76	0.71	0.93	0.65	0.62	0.59	1.09					0.5349	0.2192	0.6454	0.4344	0.2195	0.8421	0.2824	0.1312	0.0684	0.0386	0.4379	0.7742	0.7871	0.705	0.8351	0.7598	0.8592	0.8189	0.6328
	972			3-phosphoglycerate	LC/MS neg	1414	C00597	HMDB00807	724		0.71	0.88	0.75	1.25	1.06	0.85	0.75	1	1.31	1.33	1.74	1.31	0.61	0.65	0.69	1.06					0.4667	0.1996	0.6327	0.429	0.1852	0.8271	0.8015	0.2785	0.5432	0.1924	0.3915	0.7603	0.5859	0.6632	0.4837	0.6828	0.4637	0.7737	0.8754
	973			phosphoenolpyruvate (PEP)	LC/MS neg	597	C00074	HMDB00263	1005		0.73	0.76	0.53	1.05	0.73	0.7	0.67	0.85	1.85	1.26	2.76	2.19	0.5	0.46	0.56	1.75					0.78	0.2897	0.5013	0.3809	0.1229	0.6884	0.6932	0.2485	0.2027	0.0903	0.3747	0.7603	0.4657	0.6496	0.3668	0.659	0.1515	0.5937	0.861
	974			pyruvate	LC/MS polar	48990	C00022	HMDB00243	1060		1.2	0.72	0.75	0.6	0.62	1.04	1.26	1.08	1.67	0.86	1.33	1.55	0.58	0.61	0.87	1.3					0.2625	0.1344	0.4076	0.3523	0.5852	0.8871	0.0554	0.0341	0.0994	0.0524	0.7758	0.8554	0.4128	0.6315	0.7669	0.7406	0.11	0.4942	0.5996
	975			lactate	LC/MS polar	527	C00186	HMDB00190	612		1.32	0.77	0.75	0.58	0.56	0.97	0.96	1.03	0.87	1.08	0.9	0.84	1.16	0.85	1.57	1.35					0.1282	0.0774	0.2837	0.2921	0.3442	0.8454	0.0118	0.0094	0.0162	0.0135	0.8977	0.8611	0.93	0.7402	0.9058	0.7741	0.5271	0.7737	0.8367
	978			glycerate	LC/MS polar	1572	C00258	HMDB00139	752		0.53	0.65	0.86	1.21	1.6	1.32	0.62	0.64	0.72	1.02	1.17	1.14	0.9	1.05	0.88	0.76					0.1007	0.0667	0.1554	0.2439	0.7158	0.8871	0.8177	0.2819	0.1965	0.0882	0.2859	0.7603	0.3173	0.601	0.2533	0.5953	0.5661	0.7773	0.8843
	981		Pentose Phosphate Pathway	6-phosphogluconate	LC/MS neg	15442	C00345	HMDB01316	91493		1.98	0.64	0.64	0.32	0.33	1	0.77	0.61	0.95	0.78	1.23	1.57	1.42	0.56	1.34	2.11					0.0587	0.0432	0.1833	0.2515	0.3385	0.8454	0.002	0.0021	0.0058	0.006	0.702	0.8461	0.9068	0.7338	0.5683	0.6897	0.8506	0.8189	0.6497
	984			ribose 1-phosphate	LC/MS polar	1763	C00620	HMDB01489	439236		6.25	1.26	1.16	0.2	0.19	0.93	1.1	1.01	0.95	0.92	0.86	0.93	1.58	0.28	1.27	1.28					0.0004	0.0011	0.6728	0.4401	0.9669	0.9087	0.0013	0.0015	0.0004	0.0009	0.7033	0.8461	0.5974	0.6636	0.8187	0.7571	0.8227	0.8152	0.7645
	985			5-phosphoribosyl diphosphate (PRPP)	LC/MS neg	36840	C00119	HMDB00280	7339		1.18	1.33	0.81	1.13	0.69	0.61	0.66	0.82	0.56	1.24	0.85	0.69	1.42	0.79	0.87	0.98					0.3134	0.15	0.2859	0.2925	0.6844	0.8871	0.952	0.3099	0.1604	0.077	0.1438	0.7406	0.7148	0.6877	0.9722	0.7873	0.4095	0.7458	0.7409
	986			sedoheptulose-7-phosphate	LC/MS neg	35649	C05382	HMDB01068	616		3.4	0.74	0.69	0.22	0.2	0.93	0.84	0.66	0.77	0.79	0.91	1.16	1.42	0.35	1.26	1.58					0.001	0.0022	0.2846	0.2921	0.3296	0.8454	3.628e-05	0.0001	4.9274e-05	0.0002	0.9227	0.8666	0.6534	0.6738	0.3004	0.6207	0.4452	0.7648	0.5541
	992		Pentose Metabolism	ribose	LC/MS polar	1471	C00121	HMDB00283	5779		2.65	0.55	1.2	0.21	0.45	2.17	1.14	0.72	0.71	0.63	0.62	0.99	0.98	0.42	1.28	0.58					0.0282	0.0245	0.3793	0.3357	0.8981	0.9027	0.003	0.003	0.0379	0.0245	0.3149	0.7603	0.9744	0.7479	0.6669	0.7054	0.702	0.798	0.6903
	993			ribitol	LC/MS polar	15772	C00474	HMDB00508	6912		3.49	0.35	0.69	0.1	0.2	1.98	2.1	1.2	1.2	0.57	0.57	1	0.9	0.54	3.14	1.58					0.0045	0.0062	0.0266	0.1379	0.2146	0.8337	4.3395e-06	4.6029e-05	0.0001	0.0003	0.304	0.7603	0.1252	0.4772	0.8604	0.7598	0.7329	0.8006	0.1724
	994			ribonate	LC/MS polar	27731	C01685	HMDB00867	5460677		3.52	0.86	0.94	0.24	0.27	1.09	1.29	0.95	0.74	0.74	0.58	0.78	1.1	0.4	1.21	0.87					0.0012	0.0027	0.6597	0.4378	0.7555	0.8871	0.0003	0.0005	0.0005	0.0009	0.8972	0.8611	0.6198	0.6716	0.7537	0.7358	0.2142	0.6643	0.4193
	1015			arabitol/xylitol	LC/MS polar	48885	C01904		6912		2.39	0.6	0.97	0.25	0.41	1.63	1.91	1.28	1.41	0.67	0.73	1.1	0.82	0.65	1.75	1.18					0.0076	0.0094	0.2136	0.2673	0.7999	0.8927	0.0002	0.0004	0.0038	0.0044	0.3191	0.7603	0.1239	0.4772	0.5321	0.6828	0.4044	0.7458	0.3521
	1016			ribulose/xylulose	LC/MS polar	48340			5289590		1.06	0.24	0.5	0.22	0.47	2.15	0.61	0.56	0.44	0.91	0.72	0.79	0.88	0.51	2.1	0.78					0.5078	0.211	0.0224	0.1342	0.261	0.8454	0.0041	0.004	0.078	0.0426	0.2238	0.7603	0.3525	0.6315	0.5155	0.6828	0.2524	0.7007	0.7774
	1017			arabonate/xylonate	LC/MS polar	48255					7.12	0.72	0.77	0.1	0.11	1.07	3.4	1.4	0.96	0.41	0.28	0.69	0.74	0.35	1.44	0.93					6.9442e-05	0.0004	0.5583	0.3987	0.6191	0.8871	1.0799e-05	7.7893e-05	1.4355e-05	9.1556e-05	0.9292	0.8666	0.0514	0.347	0.7811	0.7462	0.8315	0.8184	0.0917
	1018			sedoheptulose	LC/MS polar	53237		HMDB03219	5459879		8.21	0.38	0.9	0.05	0.11	2.37	1.15	0.54	0.68	0.47	0.59	1.25	1.03	0.14	1.46	0.77					0.0007	0.0017	0.2781	0.2915	0.9767	0.9106	2.3827e-05	9.7646e-05	0.0007	0.0012	0.2656	0.7603	0.9615	0.7458	0.3954	0.6652	0.6558	0.798	0.4225
	1019			ribulonate/xylulonate*	LC/MS polar	61858					29.23	0.81	0.81	0.03	0.03	1	7.2	1.09	1	0.15	0.14	0.92	1.1	0.27	1.47	1.35					6.9059e-06	0.0001	0.8104	0.4694	0.6573	0.8871	3.1798e-06	4.4105e-05	1.6385e-06	3.5255e-05	0.8382	0.8554	0.1749	0.5138	0.9907	0.7897	0.8583	0.8189	0.1714
	1022		Glycogen Metabolism	maltopentaose	LC/MS neg	35163	C06218	HMDB12254	13489094		32.1	0.11	0.29	0	0.01	2.59	0.69	0.2	0.27	0.29	0.39	1.37	1.06	0.02	1.83	0.97					0.0101	0.0116	0.0065	0.0796	0.0785	0.6384	1.874e-06	3.7546e-05	5.6326e-05	0.0002	0.2918	0.7603	0.9335	0.7402	0.3411	0.6476	0.7215	0.8003	0.3012
	1023			maltotetraose	LC/MS neg	15910	C02052	HMDB01296	446495		54.73	0.39	0.21	0.01	0	0.55	0.84	0.19	0.19	0.23	0.22	0.98	1.79	0.03	0.89	1.58					0.0003	0.001	0.1032	0.2077	0.1137	0.6884	1.4134e-06	3.2197e-05	1.6626e-06	3.5255e-05	0.9602	0.8741	0.7044	0.6877	0.0973	0.4802	0.1482	0.5937	0.1957
	1025			maltotriose	LC/MS polar	44688	C01835	HMDB01262	439586		16.28	0.35	0.48	0.02	0.03	1.38	0.67	0.15	0.34	0.22	0.5	2.21	1.7	0.07	0.75	1.2					0.0043	0.006	0.2882	0.2928	0.3602	0.8517	0.0002	0.0003	0.0003	0.0007	0.8808	0.8554	0.312	0.5963	0.0479	0.3894	0.5228	0.7737	0.3153
	1028			maltose	LC/MS polar	15586	C00208	HMDB00163	10991489		9.41	0.28	0.58	0.03	0.06	2.07	0.85	0.16	0.37	0.19	0.44	2.34	1.44	0.13	0.8	0.91					0.0264	0.0232	0.0378	0.1548	0.2702	0.8454	6.6308e-05	0.0002	0.0014	0.002	0.3092	0.7603	0.6388	0.6738	0.038	0.3673	0.5738	0.7773	0.1022
	1050		Disaccharides and Oligosaccharides	sucrose	LC/MS polar	1519	C00089	HMDB00258	5988		1.16	1.75	3.6	1.51	3.1	2.05	0.49	0.16	0.41	0.33	0.83	2.56	1.53	0.65	0.14	0.17					0.5574	0.2253	0.4458	0.362	0.0887	0.6574	0.8593	0.2885	0.2556	0.1068	0.3355	0.7603	0.4002	0.6315	0.0022	0.1386	0.2508	0.7007	0.0199
	1068		Fructose, Mannose and Galactose Metabolism	fructose	LC/MS polar	48195	C00095	HMDB00660	5984		3.76	0.32	1.12	0.08	0.3	3.53	0.74	0.47	0.66	0.64	0.9	1.42	0.8	0.16	1.18	0.47					0.0118	0.0125	0.0626	0.1714	0.9418	0.9027	4.8341e-05	0.0001	0.0098	0.0089	0.0729	0.7068	0.6028	0.6636	0.1578	0.5607	0.3599	0.7458	0.3658
	1073			mannitol/sorbitol	LC/MS polar	46142	C00794	HMDB00247	5780		4.01	0.5	0.81	0.12	0.2	1.63	2.51	1.34	1.65	0.53	0.66	1.24	1.07	0.67	2.87	2.18					0.0038	0.0057	0.0856	0.1932	0.4069	0.8649	2.0217e-05	8.8799e-05	0.0004	0.0008	0.3608	0.7603	0.053	0.347	0.4654	0.68	0.2934	0.7286	0.2161
	1074			mannose	LC/MS polar	48153	C00159	HMDB00169	18950		20.55	0.53	0.74	0.03	0.04	1.4	2.86	0.64	0.92	0.22	0.32	1.44	1.19	0.17	1.42	1.47					6.5261e-05	0.0004	0.325	0.3133	0.6524	0.8871	2.752e-06	4.1353e-05	1.5652e-05	9.1556e-05	0.5903	0.8385	0.2754	0.573	0.5558	0.6897	0.9346	0.8311	0.0969
	1075			mannose-6-phosphate	LC/MS polar	1469	C00275	HMDB01078	439198		3.21	0.61	0.32	0.19	0.1	0.52	0.6	0.46	0.45	0.76	0.75	0.99	2.31	0.43	1.74	3.29					0.0072	0.009	0.1049	0.2077	0.0637	0.6124	5.8931e-05	0.0001	2.7079e-05	0.0001	0.8055	0.8554	0.4068	0.6315	0.1829	0.5607	0.087	0.4637	0.6082
	1084			galactitol (dulcitol)	LC/MS polar	1117	C01697	HMDB00107	11850		1.12	0.58	0.91	0.52	0.81	1.56	1.32	0.89	1.07	0.67	0.81	1.2	1.2	1.41	1.83	1.41					0.438	0.1899	0.1708	0.2463	0.6142	0.8871	0.0353	0.0238	0.204	0.0906	0.3805	0.7603	0.716	0.6877	0.5676	0.6897	0.9696	0.8426	0.3515
	1085			galactose 1-phosphate	LC/MS polar	15706	C00446	HMDB00645	123912		3.19	0.51	0.45	0.16	0.14	0.89	1.19	1.24	0.88	1.04	0.74	0.71	1.02	0.38	2.48	1.99					0.0016	0.0032	0.0635	0.1714	0.14	0.7336	4.6076e-06	4.6158e-05	1.67e-05	9.443e-05	0.6891	0.8461	0.6092	0.6649	0.5069	0.6828	0.7505	0.8056	0.8781
	1094			galactonate	LC/MS polar	27719	C00880	HMDB00565	128869		1.29	0.26	0.67	0.2	0.52	2.54	0.8	1.33	1.37	1.65	1.7	1.03	0.76	0.47	3.82	1.54					0.3062	0.1481	0.0891	0.1938	0.6096	0.8871	0.0083	0.0072	0.1287	0.0642	0.2266	0.7603	0.9606	0.7458	0.5784	0.6936	0.8528	0.8189	0.6124
	1099		Nucleotide Sugar	UDP-glucose	LC/MS polar	32344	C00029	HMDB00286	8629		4.65	2.83	3.28	0.61	0.7	1.16	1.09	0.74	1.11	0.67	1.01	1.51	2.71	0.64	0.7	0.92					0.0215	0.0199	0.119	0.2199	0.1417	0.7336	0.4288	0.1797	0.3771	0.1457	0.9258	0.8666	0.4884	0.6496	0.4945	0.6828	0.9954	0.8436	0.1726
	1103			UDP-galactose	LC/MS polar	15860	C00052	HMDB00302	18068		3.79	1.66	1.6	0.44	0.42	0.97	2.3	1.56	1.26	0.68	0.55	0.81	1.6	0.97	1.51	1.26					0.0069	0.0087	0.359	0.3291	0.6194	0.8871	0.0618	0.0373	0.0238	0.0178	0.6714	0.8461	0.0533	0.347	0.3961	0.6652	0.7973	0.8134	0.2638
	1104			UDP-glucuronate	LC/MS neg	2763	C00167	HMDB00935	17473		1.71	2.6	2.22	1.52	1.29	0.85	1.23	1.56	1.18	1.27	0.96	0.76	2.22	1.6	1.33	1.18					0.2679	0.1352	0.1649	0.244	0.4804	0.8649	0.7725	0.2694	0.683	0.2256	0.4865	0.8018	0.3259	0.6095	0.4395	0.6652	0.7469	0.8056	0.8318
	1106			guanosine 5'-diphospho-fucose	LC/MS neg	15903					6.37	2.81	3.25	0.44	0.51	1.15	5.24	1.1	1.86	0.21	0.36	1.7	1.25	1.03	0.49	0.72					9.0495e-05	0.0005	0.051	0.1605	0.0276	0.4924	0.0243	0.017	0.0453	0.0279	0.7849	0.8554	0.0008	0.0862	0.7754	0.744	0.2674	0.7007	0.0019
	1110			UDP-N-acetylglucosamine/galactosamine	LC/MS polar	46148					3.61	1.22	1.49	0.34	0.41	1.22	1.86	1.21	0.87	0.65	0.47	0.72	1.76	0.91	1.75	1.03					0.0059	0.0078	0.6504	0.436	0.6498	0.8871	0.0187	0.0136	0.0187	0.015	0.9994	0.8797	0.1842	0.5149	0.7223	0.7212	0.8377	0.8189	0.3265
	1111			cytidine 5'-monophospho-N-acetylneuraminic acid	LC/MS polar	36831	C00128	HMDB01176	448209		0.85	0.75	1.09	0.88	1.28	1.46	1.35	1.15	1.02	0.85	0.76	0.89	1.19	1.89	1.83	1.12					0.9884	0.3383	0.6299	0.4281	0.7554	0.8871	0.6197	0.2304	0.7445	0.241	0.8643	0.8554	0.4961	0.6496	0.7425	0.7313	0.8772	0.8189	0.7237
	1122		Aminosugar Metabolism	glucuronate	LC/MS polar	15443	C00191	HMDB00127	444791		1.9	0.56	1.23	0.3	0.65	2.19	0.93	0.89	0.93	0.96	1	1.04	1.13	0.55	1.78	0.85					0.0909	0.0623	0.0804	0.1886	0.8403	0.8989	0.0011	0.0013	0.06	0.0345	0.1195	0.7378	0.8514	0.7184	0.9564	0.7866	0.9513	0.8362	0.8088
	1126			N-acetylglucosamine 6-phosphate	LC/MS polar	15107	C00357	HMDB02817	439219		0.81	0.5	0.74	0.62	0.91	1.48	1.01	1.15	1.28	1.14	1.27	1.11	1.04	1.3	2.4	1.8					0.8304	0.302	0.0578	0.1714	0.3714	0.8621	0.0899	0.0508	0.4952	0.1787	0.3003	0.7603	0.8734	0.7248	0.5808	0.6936	0.2732	0.7019	0.6939
	1127			N-acetyl-glucosamine 1-phosphate	LC/MS polar	15741	C04256	HMDB01367	440364		1.3	0.65	1.07	0.5	0.82	1.65	1.25	2.18	1.18	1.74	0.94	0.54	1.01	0.97	3.4	1.12					0.2149	0.1137	0.7265	0.4541	0.5063	0.8687	0.1147	0.0619	0.5588	0.1967	0.3125	0.7603	0.4486	0.6496	0.0501	0.3894	0.4896	0.7737	0.2169
	1133			N-acetylneuraminate	LC/MS polar	32377	C00270	HMDB00230	439197		1.34	0.68	1.05	0.51	0.79	1.56	1.34	0.77	1.01	0.58	0.76	1.31	1.59	1.59	1.82	1.53					0.2294	0.1207	0.3679	0.3296	0.8227	0.8989	0.0393	0.0255	0.156	0.0752	0.4971	0.8112	0.6044	0.6636	0.4394	0.6652	0.7975	0.8134	0.2
	1144			N-acetylglucosaminylasparagine	LC/MS pos early	48149	C04540	HMDB00489	123826		1.61	0.75	0.85	0.46	0.53	1.14	1.67	1.17	1.26	0.7	0.76	1.08	1.07	1.11	1.68	1.59					0.0531	0.0397	0.4574	0.3676	0.7531	0.8871	0.0091	0.0078	0.0261	0.0187	0.6669	0.8461	0.1567	0.5061	0.5857	0.6959	0.6764	0.798	0.3767
	1145			erythronate*	LC/MS polar	42420		HMDB00613	2781043		1.12	0.52	0.61	0.47	0.55	1.17	0.85	0.88	0.73	1.04	0.86	0.83	1.3	0.98	2.18	1.55					0.3323	0.156	0.039	0.1556	0.122	0.6884	0.0034	0.0033	0.0143	0.0123	0.5821	0.8385	0.7384	0.6931	0.6829	0.7066	0.3518	0.745	0.9405
	1147			N-acetylglucosamine/N-acetylgalactosamine	LC/MS pos early	46539		HMDB00215	24139		1.11	0.46	0.61	0.41	0.55	1.34	0.94	1.09	0.82	1.17	0.87	0.75	1	0.84	2.38	1.33					0.3983	0.1774	0.0897	0.1938	0.2816	0.8454	0.0132	0.0101	0.0588	0.0341	0.5209	0.8193	0.1732	0.5138	0.7226	0.7212	0.742	0.805	0.0888
	1148		Advanced Glycation End-product	N6-carboxymethyllysine	LC/MS pos early	36713			123800		1.37	1.85	1.43	1.35	1.04	0.77	1.22	0.9	0.5	0.73	0.41	0.55	1.58	1.41	0.77	0.55					0.2118	0.1127	0.1173	0.2183	0.2316	0.8454	0.7418	0.2616	0.9571	0.2925	0.7016	0.8461	0.4031	0.6315	0.7897	0.7467	0.2243	0.6744	0.2721
	1152	Energy	TCA Cycle	citrate	LC/MS neg	1564	C00158	HMDB00094	311		0.93	1.16	1.82	1.25	1.96	1.57	1.27	0.75	1.36	0.59	1.07	1.81	0.99	1.35	0.64	0.74					0.7127	0.271	0.8383	0.4785	0.0418	0.5877	0.5677	0.217	0.0177	0.0144	0.0649	0.7068	0.4871	0.6496	0.1903	0.5607	0.2619	0.7007	0.0487
[truncated: 306 more rows]
[truncated: 41 more columns]
