# Supplementary material for: Targeting dopamine receptor D2 as a novel therapeutic strategy in endometrial cancer
Source: J Exp Clin Cancer Res. 2021 Feb 8;40:61. doi: 10.1186/s13046-021-01842-9 (PMC7869513; doi:10.1186/s13046-021-01842-9)
Supplement: Supplementary file 2 — Additional file 2. [file 13046_2021_1842_MOESM2_ESM.xlsx]

## Sheet: glycoslysis carb and eicosanoid
PATHWAY SORTORDER	BIOCHEMICAL	SUPER PATHWAY	SUB PATHWAY	COMP ID	PLATFORM	CHEMICAL ID	RI	MASS	PUBCHEM	CAS	KEGG	Group HMDB	HFD Control	LFD Control	HFD ONC201	HFD ONC201	HFD ONC201	HFD ONC201	HFD ONC201	HFD ONC201	LFD ONC201	LFD ONC201	LFD ONC201	LFD ONC201	LFD ONC201	LFD ONC201	Scaled HFD	Scaled HFD	Scaled HFD	Scaled HFD	Scaled HFD	Scaled HFD	Scaled LFD	Scaled LFD	Scaled LFD	Scaled LFD	Scaled LFD	Scaled LFD		HFD + ONC201/ HFD +veh lean LFD +ONC201/ LFD +veh	Pvalue	Qvalue
1148	N6-carboxymethyllysine	Carbohydrate and Glycolysis	Advanced Glycation End-product	36713	LC/MS Pos Early	100001768	2500	205.118	123800	5746-04-03			1.46333	0.924533	0.465	0.6541	1	1.021	0.654	4.0739	0.8963	4.2633	1.2971	0.5804	0.9434	2.2832	0.275276	0.387221	0.59199	0.604422	0.387162	2.41171	0.969462	4.6113	1.40298	0.627776	1.02041	2.46957		0.419563	0.220019	0.264138
1145	erythronate*		Aminosugar Metabolism	42420	LC/MS Polar	100001320	2186	135.03	2781043	88759-55-1		HMDB00613	1.367	1.05092	0.8702	0.8838	1.0554	0.8836	2.3912	1.0982	0.4877	0.5635	0.8231	0.1148	0.4637	0.8419	0.513994	0.522027	0.623384	0.521909	1.41239	0.648665	0.464071	0.536199	0.783221	0.109238	0.441234	0.80111		1.3532	0.123682	0.206969
1122	glucuronate		Aminosugar Metabolism	15443	LC/MS Polar	100000257	3233.3	193.035	444791	207300-70-7	C00191	HMDB00127	1.08	0.95885	0.5675	1.2138	0.7934	1.3158	0.8405	1.0619	0.1742	0.5148	0.3407	0.1243	1.0142	1.0784	0.29224	0.625058	0.408569	0.677584	0.432824	0.546836	0.181676	0.536893	0.355321	0.129634	1.05773	1.12468		0.881031	0.14792	0.22217
1127	N-acetyl-glucosamine 1-phosphate		Aminosugar Metabolism	15741	LC/MS Polar	1212	4052	300.049	440364	31281-59-1	C04256	HMDB01367	0.857833	0.848067	0.9909	4.0686	1.0628	1.4873	2.9898	0.6123	0.5799	0.4847	0.6912	0.1222	0.6809	0.7397	0.772702	3.17269	0.828769	1.15979	2.33144	0.47747	0.683791	0.571535	0.81503	0.144092	0.802885	0.872219		2.24778	0.0642667	0.175205
1126	N-acetylglucosamine 6-phosphate		Aminosugar Metabolism	15107	LC/MS Polar	1213	4114	300.049	439219	102029-88-9	C00357	HMDB02817	1.12612	1.0803	1.1058	0.9782	0.9101	1.8205	2.2838	0.6987	0.549	0.4789	0.6366	0.1572	0.7006	0.7208	0.764395	0.676191	0.629116	1.25844	1.5787	0.482983	0.508192	0.443303	0.589281	0.145515	0.648524	0.667222		1.79539	0.0315061	0.171135
1147	N-acetylglucosamine/N-acetylgalactosamine		Aminosugar Metabolism	46539	LC/MS Pos Early	100006435	715	222.097	24139			HMDB00215	1.07425	1.07895	1.0983	1.3281	0.5481	1.323	1.7284	1.0258	0.4043	0.148	0.3186	0.2844	1.3945	0.4125	0.592741	0.716762	0.295804	0.714009	0.9328	0.553614	0.374716	0.13717	0.295287	0.26359	1.29246	0.382316		1.38615	0.0189737	0.153254
1144	N-acetylglucosaminylasparagine		Aminosugar Metabolism	48149	LC/MS Pos Early	1215	1212	336.14	123826	2776-93-4	C04540	HMDB00489	0.915767	0.853217	0.7566	1.1774	1.1755	1.4728	1.1001	0.7544	0.8347	0.5571	0.8364	0.0605	0.6234	0.9104	0.316878	0.493117	0.492322	0.616837	0.460743	0.315957	0.978298	0.652941	0.98029	0.0709081	0.730647	1.06702		0.601739	0.0547739	0.17396
1133	N-acetylneuraminate		Aminosugar Metabolism	32377	LC/MS Polar	1162	3072.6	308.099	439197	131-48-6	C00270	HMDB00230	1.3186	0.831767	0.4846	1.4113	0.9332	2.016	1.0083	0.2681	0.4	0.4682	0.7835	0.0532	0.9917	0.6741	0.191264	0.557019	0.36832	0.795685	0.397961	0.105815	0.480904	0.562898	0.941971	0.0639602	1.19228	0.810444		0.596197	0.70696	0.494802
1050	sucrose		Disaccharides and Oligosaccharides	1519	LC/MS Polar	935	3092	387.114	5988	57-50-1	C00089	HMDB00258	1.90102	1.24607	0.3187	0.7035	0.2135	0.3026	0.2285	0.0633	0.5243	5.5005	0.7992	0.7565	1.9713	3.5588	0.219894	0.485396	0.147309	0.208786	0.157659	0.0436753	0.420764	4.41429	0.641378	0.60711	1.58202	2.85603		0.120012	0.057652	0.17396
1068	fructose		Fructose, Mannose and Galactose Metabolism	48195	LC/MS Polar	878	2065	225.062	5984	57-48-7	C00095	HMDB00660	1.47455	1.83773	0.3511	0.7735	0.8471	0.7771	0.3343	1.0564	0.4067	0.8108	0.6126	0.3398	0.6746	0.6547	0.185864	0.409472	0.448434	0.411378	0.17697	0.559233	0.221305	0.441196	0.333345	0.184902	0.367083	0.356254		1.15087	0.132537	0.212613
1084	galactitol (dulcitol)		Fructose, Mannose and Galactose Metabolism	1117	LC/MS Polar	1003	2360	181.072	11850	608-66-2	C01697	HMDB00107	1.10432	0.922733	0.5014	1.3579	0.926	1.9424	0.5034	0.6524	0.4331	0.5835	0.4885	0.0767	0.6233	1.0169	0.349047	0.945295	0.64463	1.35219	0.350439	0.454165	0.469366	0.63236	0.529405	0.0831226	0.675493	1.10205		1.17297	0.255254	0.283863
1094	galactonate		Fructose, Mannose and Galactose Metabolism	27719	LC/MS Polar	100001026	3085	195.051	128869	299-28-5	C00880	HMDB00565	1.18872	1.56183	1.195	1.7482	0.1399	1.7296	3.6662	1	0.3867	0.8632	0.1399	0.1399	0.1399	0.8121	0.669212	0.979009	0.0783454	0.968593	2.05311	0.56001	0.247594	0.552684	0.0895742	0.0895742	0.0895742	0.519966		3.34071	0.0462438	0.17396
1085	galactose 1-phosphate		Fructose, Mannose and Galactose Metabolism	15706	LC/MS Polar	100000300	4552	259.022	123912	19046-60-7	C00446	HMDB00645	1.184	1.1631	0.7722	2.2714	1.2545	1.7549	1.7787	0.9665	0.4375	1.1902	0.6004	0.0507	0.337	0.9282	0.478295	1.40689	0.777029	1.08697	1.10171	0.598644	0.37615	1.0233	0.516207	0.0435904	0.289743	0.79804		1.78848	0.0144808	0.13606
1073	mannitol/sorbitol		Fructose, Mannose and Galactose Metabolism	46142	LC/MS Polar	100001740	2320	181.072	5780		C00794	HMDB00247	0.9562	0.895483	1.0955	1.2795	0.7597	1.7379	2.0281	0.7678	0.5507	0.4811	0.5371	0.1111	0.4655	0.5226	0.540063	0.630772	0.374519	0.856756	0.999819	0.378513	0.614975	0.537252	0.599788	0.124067	0.519831	0.583595		1.26881	0.0108596	0.119665
1074	mannose		Fructose, Mannose and Galactose Metabolism	48153	LC/MS Polar	803	2200	225.062	18950	3458-28-4	C00159	HMDB00169	1.39813	1.17335	0.6018	0.9816	0.9912	0.9519	1.1552	0.6544	0.5784	0.8865	0.5195	0.2714	0.8456	0.6431	0.286867	0.467911	0.472487	0.453754	0.550663	0.311941	0.492948	0.755529	0.442749	0.231304	0.720672	0.548089		0.797052	0.32615	0.323969
1075	mannose 6-phosphate		Fructose, Mannose and Galactose Metabolism	1469	LC/MS Polar	294	4510	259.022	439198	70442-25-0;104872-94-8	C00275	HMDB01078	2.11287	0.913983	0.6452	1.6702	0.9606	1.2289	0.9178	0.4097	0.1705	2.3679	0.2582	0.0421	0.1639	0.3462	0.390565	1.01104	0.581489	0.743901	0.55558	0.248007	0.186546	2.59075	0.2825	0.0460621	0.179325	0.378782		0.963596	0.725747	0.501326
1022	maltopentaose		Glycogen Metabolism	35163	LC/MS Neg	100001447	1080.9	827.267	13489094	34620-76-3	C06218	HMDB12254	2.27453	2.14958	0.0652	0.1651	0.2553	0.8725	0.2897	1.0312	0.2022	1	0.0652	0.0652	0.0652	0.0652	0.0380941	0.0964623	0.149163	0.509772	0.169262	0.602495	0.0940647	0.465206	0.0303315	0.0303315	0.0303315	0.0303315		2.29982	0.432581	0.370113
1028	maltose		Glycogen Metabolism	15586	LC/MS Polar	913	3329.4	387.114	10991489	6363-53-7	C00208	HMDB00163	3.01317	2.09755	0.0633	0.2527	0.2832	0.8047	0.3318	1.119	0.2049	1.6948	0.2221	0.1922	0.5712	0.6755	0.0391579	0.156322	0.17519	0.497794	0.205254	0.692222	0.0976854	0.80799	0.105885	0.0916307	0.272318	0.322042		1.04029	0.349106	0.3352
1023	maltotetraose		Glycogen Metabolism	15910	LC/MS Neg	100000275	910	665.215	446495	34612-38-9	C02052	HMDB01296	4.2132	2.35	0.1136	0.4126	0.3552	0.5213	1.4394	1.9999	0.3317	3.5518	0.2964	0.1136	0.1136	1.0473	0.0507785	0.18443	0.158772	0.233018	0.643403	0.893943	0.141149	1.5114	0.126128	0.0483404	0.0483404	0.44566		0.932497	0.453579	0.382316
1025	maltotriose		Glycogen Metabolism	44688	LC/MS Polar	100000276	4286.4	549.167	439586	1109-28-0	C01835	HMDB01262	3.39083	1.99245	0.072	0.1804	0.1867	0.5005	0.9	1.2421	0.2482	1.7733	0.3673	0.1869	0.6426	0.9151	0.0351663	0.088111	0.0911881	0.244454	0.439578	0.606667	0.12457	0.89001	0.184346	0.0938041	0.322518	0.459284		0.725545	0.191818	0.24634
955	1,5-anhydroglucitol (1,5-AG)		Glycolysis, Gluconeogenesis, and Pyruvate Metabolism	20675	LC/MS Neg	100000580	802	163.061	64960	154-58-5	C07326	HMDB02712	0.978367	0.961083	0.7022	1.0832	1.158	0.9851	1.1501	1.522	0.7605	1.3883	1.0977	0.3485	0.6368	0.9164	0.789447	1.21779	1.30188	1.1075	1.293	1.71111	0.791295	1.44452	1.14215	0.362612	0.662586	0.953507		1.38532	0.254109	0.283617
971	2-phosphoglycerate		Glycolysis, Gluconeogenesis, and Pyruvate Metabolism	35629	LC/MS Polar	100000093	4550	184.986	59	70195-25-4	C00631	HMDB03391	1.54215	2.37252	0.4049	1.0819	1.3444	2.0559	0.1512	1.0534	0.2179	6.2206	1.6103	0.1895	0.4032	1.7556	0.314059	0.83917	1.04278	1.59465	0.117277	0.817064	0.0918434	2.62194	0.678731	0.079873	0.169946	0.739974		1.0782	0.873433	0.556737
972	3-phosphoglycerate		Glycolysis, Gluconeogenesis, and Pyruvate Metabolism	1414	LC/MS Neg	132	583	184.986	724	80731-10-8	C00597	HMDB00807	0.903483	1.48572	0.7987	0.2259	2.16	1.1083	0.1237	1	0.717	2.4641	1.9436	0.5659	0.8697	1.32	0.773947	0.218899	2.09306	1.07395	0.119866	0.969008	0.482595	1.65853	1.30819	0.380894	0.585374	0.88846		0.989572	0.775803	0.52067
967	dihydroxyacetone phosphate (DHAP)		Glycolysis, Gluconeogenesis, and Pyruvate Metabolism	15522	LC/MS Pos Early	309	539	171.005	668	102783-56-2	C00111	HMDB01473	1.1704	1.10493	1.5306	0.6084	0.8618	0.9575	1.0951	1.1813	0.7775	1.0091	0.4176	0.0361	0.5166	0.5882	0.863648	0.343292	0.486275	0.540274	0.617915	0.666554	0.703662	0.913268	0.377941	0.0326717	0.46754	0.53234		1.16203	0.0415834	0.17396
965	Isobar: hexose diphosphates		Glycolysis, Gluconeogenesis, and Pyruvate Metabolism	46896	LC/MS Neg	100002180	551	338.989			C00354		1.58038	1.40798	1.5901	0.6054	1.4415	1.4815	2.242	1.0308	0.5468	2.3426	0.5439	0.2659	0.3015	1.0517	0.819534	0.312022	0.742945	0.763561	1.15552	0.531272	0.388357	1.6638	0.386297	0.188852	0.214136	0.746955		1.20523	0.315941	0.318229
962	fructose 6-phosphate		Glycolysis, Gluconeogenesis, and Pyruvate Metabolism	12021	LC/MS Polar	1232	4261	259.022	69507	103213-47-4	C05345	HMDB00124	1.57755	1.02973	0.428	1.3863	1.237	1.2803	1	0.3837	0.1638	1.2139	0.5287	0.0109	0.2622	0.677	0.14577	0.472152	0.421302	0.43605	0.340584	0.130682	0.15907	1.17885	0.513434	0.0105853	0.254629	0.657452		0.701704	0.512216	0.41409
958	glucose		Glycolysis, Gluconeogenesis, and Pyruvate Metabolism	48152	LC/MS Polar	572	2342	225.062	79025	50-99-7	C00031	HMDB00122	0.844067	1.01922	0.0843	0.4672	0.6224	0.6594	0.1578	0.4435	0.9431	1.1747	0.5576	0.4136	1.0924	0.7506	0.0652216	0.361465	0.481541	0.510168	0.122087	0.343129	0.925318	1.15255	0.547087	0.405802	1.0718	0.736448		0.389256	0.0789802	0.178685
959	glucose 6-phosphate		Glycolysis, Gluconeogenesis, and Pyruvate Metabolism	31260	LC/MS Polar	291	4537	259.022	5958	103192-55-8	C00668	HMDB01401	2.34208	0.864967	0.8001	2.0311	0.6963	1.4083	0.7576	0.3328	0.1697	2.0307	0.2841	0.0065	0.2029	0.35	0.652069	1.65532	0.567474	1.14774	0.617433	0.271227	0.196193	2.34772	0.328452	0.00751474	0.234576	0.40464		1.3956	0.686769	0.489456
978	glycerate		Glycolysis, Gluconeogenesis, and Pyruvate Metabolism	1572	LC/MS Polar	1052	2070.4	105.019	752	600-19-1	C00258	HMDB00139	1.44448	1.60388	0.4199	0.6176	1.4981	0.8713	1.0027	1.0961	0.5685	1.8963	1.5345	0.336	0.7513	1.1513	0.236259	0.347497	0.842916	0.490243	0.564176	0.616728	0.354452	1.18232	0.95674	0.209492	0.468426	0.71782		0.796508	0.946056	0.58114
975	lactate		Glycolysis, Gluconeogenesis, and Pyruvate Metabolism	527	LC/MS Polar	482	1468.8	89.0244	612	79-33-4	C00186	HMDB00190	1.1443	0.98235	0.8479	1.0243	1.5456	0.9757	1.7753	0.933	0.5159	1.0855	1.3639	0.1797	0.545	0.8226	0.662569	0.800412	1.20777	0.762434	1.38726	0.729068	0.525169	1.105	1.38841	0.182929	0.554792	0.83738		1.20808	0.259513	0.285668
973	phosphoenolpyruvate (PEP)		Glycolysis, Gluconeogenesis, and Pyruvate Metabolism	597	LC/MS Neg	463	587.3	166.975	1005	10526-80-4	C00074	HMDB00263	0.761383	1.51845	0.3241	0.1573	1.3194	0.8411	0.0817	1.143	0.855	1.853	1.9178	0.1689	0.88	1.2641	0.172469	0.0837066	0.702114	0.447588	0.0434763	0.608243	0.563074	1.22032	1.263	0.111232	0.579538	0.832494		0.450273	0.806519	0.533508
974	pyruvate		Glycolysis, Gluconeogenesis, and Pyruvate Metabolism	48990	LC/MS Polar	823	1083	87.0088	1060	127-17-3	C00022	HMDB00243	0.644517	1.10975	0.4303	0.2241	1.1495	0.7569	1.0114	0.6135	0.5822	1.3029	1.1266	0.148	0.5767	1.0546	0.222896	0.116084	0.595442	0.392075	0.523906	0.317793	0.524623	1.17405	1.01518	0.133363	0.519667	0.950304		0.502224	0.215999	0.262106
1111	cytidine 5'-monophospho-N-acetylneuraminic acid		Nucleotide Sugar	36831	LC/MS Polar	1223	3900	613.14	448209	3063-71-6	C00128	HMDB01176	1.32045	1.10805	1.3839	1.5111	1.0904	1.4553	2.9876	0.6743	0.713	0.7101	1.6814	0.127	0.811	0.9227	1.62325	1.77245	1.27899	1.707	3.50431	0.790921	0.643473	0.640856	1.51744	0.114616	0.731916	0.832724		2.38269	0.218557	0.263413
1106	guanosine 5'-diphospho-fucose		Nucleotide Sugar	15903	LC/MS Neg	335	755	588.075		15839-70-0			0.477567	0.3809	0.3253	0.7619	0.5416	0.3858	0.8034	0.3253	0.6752	0.3253	2.6321	0.3253	1.2283	1.2404	0.211371	0.495062	0.351917	0.250682	0.522027	0.211371	1.77264	0.85403	6.91021	0.85403	3.22473	3.2565		0.121053	0.125783	0.208977
1103	UDP-galactose		Nucleotide Sugar	15860	LC/MS Polar	100000298	4000	565.048	18068	2956-16-3;91183-98-1;137868-52-1	C00052	HMDB00302	0.8282	0.516967	1.8212	0.8644	0.9182	0.8576	3.0427	0.2295	0.7705	0.6242	1.5887	0.1167	1.0098	1.0285	0.802804	0.381036	0.404752	0.378039	1.34125	0.101166	1.49042	1.20743	3.07312	0.22574	1.95332	1.98949		0.342979	0.876063	0.557289
1099	UDP-glucose		Nucleotide Sugar	32344	LC/MS Polar	1096	3950	565.048	8629	117756-22-6	C00029	HMDB00286	1.2933	0.477717	1.8927	0.5422	0.6779	0.3224	2.1645	0.1126	1.0132	1.0987	2.8779	0.2013	1.9834	0.9378	9.51983	2.72714	3.40967	1.62159	10.8869	0.566351	2.12092	2.2999	6.02428	0.421379	4.15183	1.96309		1.69194	0.0473623	0.17396
1104	UDP-glucuronate		Nucleotide Sugar	2763	LC/MS Neg	1097	588	579.027	17473	28053-08-9;63700-19-6	C00167	HMDB00935	1.17877	0.531467	4.7466	0.9155	0.8912	0.4598	3.7707	0.2708	1.1528	0.685	3.3482	0.1938	1.4997	1.4051	12.1459	2.34263	2.28045	1.17656	9.64867	0.692938	2.16909	1.28889	6.29992	0.364651	2.82181	2.64382		1.81465	0.353677	0.336779
1110	UDP-N-acetylglucosamine/galactosamine		Nucleotide Sugar	46148	LC/MS Polar	100002957	3665	606.074					1.1329	0.6428	2.2889	1.2377	0.6288	0.7164	3.063	0.3237	0.7813	0.5166	1.2659	0.2434	1.1517	0.7472	1.45144	0.784853	0.398736	0.454285	1.94232	0.205265	1.21546	0.803671	1.96935	0.378656	1.79169	1.16241		0.715301	0.991106	0.589191
1015	arabitol/xylitol		Pentose Metabolism	48885	LC/MS Polar	100006430	1932.4	151.061	6912		C01904		0.826133	1.0117	0.6246	1.2579	0.916	1.5067	1.1304	0.9177	0.5215	0.5415	0.988	0.11	0.4804	0.9789	0.457393	0.921156	0.670784	1.10335	0.827788	0.672029	0.515469	0.535238	0.976574	0.108728	0.474844	0.967579		1.30015	0.00725479	0.104378
1017	arabonate/xylonate		Pentose Metabolism	48255	LC/MS Polar	100006115	2700	165.04					0.885633	1.198	0.5157	0.6567	1.444	3.3555	0.5045	0.9569	0.6212	1.3795	1.1952	0.3369	0.6077	1.0087	0.369483	0.470505	1.03458	2.40411	0.361459	0.685589	0.518531	1.1515	0.997663	0.281219	0.507262	0.841987		1.23907	0.242007	0.277509
993	ribitol		Pentose Metabolism	15772	LC/MS Polar	100000406	1789.6	151.061	6912	488-81-3	C00474	HMDB00508	0.894267	0.98865	0.4365	1.4928	0.632	2.1277	0.6638	1.1019	0.3349	0.3794	0.4571	0.0847	0.2766	0.5238	0.158135	0.540811	0.228961	0.770822	0.240481	0.399196	0.338745	0.383756	0.462348	0.0856724	0.279775	0.529813		1.12417	0.0320258	0.171135
994	ribonate (ribonolactone)		Pentose Metabolism	27731	LC/MS Polar	100001007	2425	165.04	5460677	5336-08-03	C01685	HMDB00867	1.07315	0.979233	0.4527	0.721	1.0952	1.0528	1.1083	1.7015	0.6298	0.8887	1.6506	0.2861	0.491	1.1143	0.191148	0.304436	0.462438	0.444535	0.46797	0.718443	0.643156	0.907547	1.6856	0.292167	0.501413	1.13793		0.500979	0.734387	0.504268
992	ribose		Pentose Metabolism	1471	LC/MS Polar	914	1508.2	195.051	5779	50-69-1	C00121	HMDB00283	1.32683	1.34732	0.5871	1.1232	1.0579	0.8603	1.4896	0.6049	0.4463	0.6938	1.1957	0.153	0.7064	1.2896	0.388752	0.743734	0.700496	0.569653	0.986349	0.400539	0.331251	0.514949	0.887468	0.113559	0.524301	0.957162		1.13844	0.355193	0.337874
1019	ribulonate/xylulonate*		Pentose Metabolism	61858	LC/MS Polar	100019968	2350	165.04					1.01192	0.922483	0.8428	0.5246	1.9616	1.5235	1.1766	0.5723	0.5101	0.8543	1.2252	0.1908	0.9047	0.7909	0.464067	0.288858	1.08011	0.838878	0.647866	0.315123	0.552964	0.926087	1.32815	0.206833	0.980722	0.85736		0.749136	0.341879	0.331794
1016	ribulose/xylulose		Pentose Metabolism	48340	LC/MS Polar	100006122	1400	149.046	5289590				1.57763	1.78467	0.4095	1.1211	0.4455	0.7603	0.7741	1.7718	0.183	0.9345	0.183	0.183	0.3723	0.6629	0.271957	0.744546	0.295866	0.504931	0.514096	1.17669	0.10254	0.523627	0.10254	0.10254	0.20861	0.371442		2.48571	0.0643635	0.175205
1018	sedoheptulose		Pentose Metabolism	53237	LC/MS Polar	100002619	2255	209.067	5459879	3019-74-7		HMDB03219	1.62212	1.57763	0.4472	1.2487	0.8521	0.7552	0.722	1.2313	0.3767	0.8549	0.629	0.186	0.7242	0.8375	0.267371	0.74657	0.509451	0.451517	0.431668	0.736167	0.238775	0.541888	0.398698	0.117898	0.459042	0.530858		1.37408	0.16098	0.229354
985	5-phosphoribosyl diphosphate (PRPP)		Pentose Phosphate Pathway	36840	LC/MS Neg	166	570	308.978	7339	108321-05-7	C00119	HMDB00280	1.43463	1.01362	1.4288	0.436	0.8462	0.7785	2.8741	0.666	0.7466	1.9627	1.6395	0.436	1.7582	1.5547	0.922183	0.281405	0.546159	0.502463	1.85502	0.429853	0.73657	1.93633	1.61748	0.430143	1.73458	1.53381		0.567922	0.177179	0.237131
981	6-phosphogluconate		Pentose Phosphate Pathway	15442	LC/MS Neg	100000341	583.9	275.017	91493	921-62-0;53411-70-4	C00345	HMDB01316	1.54163	1.08648	0.6181	1.6872	0.46	1	0.7569	1.086	0.657	2.2247	0.2088	0.0645	0.3737	0.6536	0.441416	1.20491	0.328509	0.71415	0.54054	0.775567	0.604703	2.04762	0.19218	0.0593658	0.343954	0.601574		1.04045	0.914716	0.571513
984	ribose 1-phosphate		Pentose Phosphate Pathway	1763	LC/MS Polar	219	4025	229.012	439236	50-99-7;58459-37-3	C00620	HMDB01489	1.0428	0.661267	0.703	1.5878	1.2245	0.8753	1.674	0.2755	0.2566	1.3922	1.638	0.0838	0.4575	1.159	0.445972	1.00727	0.776803	0.555276	1.06196	0.174773	0.388043	2.10535	2.47706	0.126726	0.691854	1.7527		0.533306	0.605857	0.457273
986	sedoheptulose-7-phosphate		Pentose Phosphate Pathway	35649	LC/MS Neg	100001628	599.6	289.033	616	2646-35-7	C05382	HMDB01068	1.50582	1.06135	0.9055	1.7043	0.9932	0.8136	0.8	0.7597	0.5491	2.0984	0.5504	0.221	0.4743	0.8483	0.540414	1.01715	0.592755	0.485567	0.47745	0.453399	0.51736	1.9771	0.518585	0.208225	0.446884	0.799265		0.798387	0.772772	0.520152
1695	12-HETE	Eicosanoids	Eicosanoid	37536	LC/MS Neg	100002167	5326	319.228	5312983	71030-37-0;73837-14-6		HMDB06111	2.05365	1.2223	0.2571	1.0974	2.0823	1.0103	0.3048	1.4817	1.3062	0.9434	0.2734	0.0856	0.5361	0.9897	0.260887	1.11357	2.11297	1.02518	0.30929	1.50353	1.06864	0.771824	0.223677	0.0700319	0.438599	0.809703		1.87006	0.787785	0.525608
1701	12-HHTrE		Eicosanoid	57393	LC/MS Neg	1261	5175	279.197	5283141	54397-84-1	C20388	HMDB12535	1.5313	1.32607	1.3799	5.2408	0.7674	1.8924	3.2165	1.5653	0.4776	0.8569	0.1401	0.131	0.4667	0.541	1.55558	5.90801	0.865098	2.13332	3.626	1.76458	0.360163	0.646197	0.105651	0.0987884	0.351943	0.407973		8.04408	0.0394303	0.17396
1697	15-HETE		Eicosanoid	37538	LC/MS Neg	100000565	5298	319.228	5280724	54845-95-3	C04742	HMDB02110	1.75628	1.54433	0.7869	1.4705	1.0601	1.146	0.8483	0.5237	1.205	0.8262	0.3736	0.0509	0.8234	0.811	0.804122	1.50268	1.0833	1.17108	0.866865	0.535161	0.780272	0.534988	0.241917	0.0329592	0.533175	0.525146		2.25158	0.415393	0.365212
1656	6-keto prostaglandin F1alpha		Eicosanoid	20476	LC/MS Pos Late	100000571	926	353.232	5280888	58961-34-8;58962-34-8	C05961	HMDB02886	1.3941	1.58152	2.2532	2.4022	1.0741	2.278	3.1418	1.4801	0.7001	0.5783	0.2248	0.0912	0.5769	0.6739	1.82934	1.95031	0.872047	1.84948	2.55078	1.20167	0.442676	0.365662	0.142142	0.0576662	0.364776	0.42611		5.69953	0.00171575	0.0727612
1646	prostaglandin D2		Eicosanoid	7737	LC/MS Neg	486	4650	351.218	448457	41598-07-6	C00696	HMDB01403	0.6071	1.10232	1.3325	1.1512	0.06	0.5936	3.7646	0.7734	0.5498	0.3726	0.06	0.06	1	0.3124	0.636788	0.550147	0.0286734	0.283675	1.79906	0.3696	0.498768	0.338015	0.0544308	0.0544308	0.90718	0.283403		1.71702	0.101351	0.190681
1640	prostaglandin E2		Eicosanoid	7746	LC/MS Neg	487	4573	351.218	5280360	363-24-6	C00584	HMDB01220	2.22372	4.18962	2.6727	1.099	0.5472	1.6499	9.7713	0.7892	0.5684	0.4171	0.1141	0.0666	0.5111	0.3887	1.75263	0.720671	0.358828	1.08193	6.40755	0.51752	0.135669	0.0995556	0.027234	0.0158964	0.121992	0.092777		21.9805	0.133486	0.213392
1652	prostaglandin F2alpha		Eicosanoid	19398	LC/MS Neg	100000574	4658	353.233	5280363	551-11-1	C00639	HMDB01139	1.35287	1.42192	0.1886	1.8133	0.4059	4.5248	0.2827	0.2873	1.8067	0.2365	0.4802	0.0792	2.6224	0.4616	0.0832953	0.800845	0.179266	1.99838	0.124855	0.126886	1.27061	0.166325	0.337713	0.0556995	1.84427	0.324632		0.828537	0.676928	0.486965
1713	docosahexaenoyl ethanolamide		Endocannabinoid	43768	LC/MS Pos Late	100004612	1536	372.29	5283451	162758-94-3			0.906967	1.45752	0.798	0.2383	1.5735	2.27	3.0721	1.0994	1.3294	1.1212	0.2482	0.0264	1.0054	0.4134	0.46268	0.138166	0.912315	1.31615	1.7812	0.637432	0.912099	0.769254	0.17029	0.018113	0.689803	0.283633		1.84579	0.0503065	0.17396
1726	linoleoyl ethanolamide		Endocannabinoid	52608	LC/MS Neg	100006726	6150	322.275	5283446	68171-52-8		HMDB12252	1.57157	1.33178	1.2332	1.8293	0.4786	0.4412	0.8581	1.0871	0.6535	1.5174	0.2394	3.2998	0.872	0.6482	0.635239	0.942299	0.246534	0.227268	0.44202	0.559981	0.490695	1.13937	0.179759	2.47773	0.654761	0.486716		0.562409	0.476326	0.394123
1719	N-arachidonoyltaurine		Endocannabinoid	54748	LC/MS Neg	100005817	5481	410.237		119959-65-8			0.1522	0.421367	0.1522	0.1522	0.3156	0.2319	0.1522	0.3331	0.1522	0.3546	0.1522	0.1522	0.1522	0.3283	0.107798	0.107798	0.223529	0.164247	0.107798	0.235923	0.361206	0.841547	0.361206	0.361206	0.361206	0.779131		0.308952	0.00664076	0.102833
1724	N-linoleoyltaurine*		Endocannabinoid	61826	LC/MS Neg	100005814	5505	386.237					1.74083	0.8489	0.2971	1.3916	0.7659	0.5059	0.2971	1.7458	0.2971	0.6802	0.2971	0.2971	0.2971	0.758	0.134593	0.630425	0.346969	0.229184	0.134593	0.790885	0.349982	0.801272	0.349982	0.349982	0.349982	0.89292		0.732566	0.840236	0.54294
1738	N-oleoylserine		Endocannabinoid	57664	LC/MS Neg	100015641	5600	368.281					0.27115	0.300583	0.2497	0.2497	0.2497	0.2497	0.2497	0.2497	0.2497	0.2497	0.2497	0.2497	0.2497	0.2497	0.23431	0.23431	0.23431	0.23431	0.23431	0.23431	0.830718	0.830718	0.830718	0.830718	0.830718	0.830718		0.282057	NA	NA
1720	N-oleoyltaurine		Endocannabinoid	39732	LC/MS Neg	100003119	5610	388.253	6437033	52514-04-2			1.77477	1.24013	0.6584	1.7825	0.7507	0.3816	0.2035	0.895	1.2368	0.7162	0.7638	0.7799	0.4861	1.0062	0.576633	1.56113	0.657471	0.334209	0.178227	0.78385	0.997312	0.577519	0.615902	0.628884	0.391974	0.811364		1.01704	0.164953	0.231185
1722	N-palmitoyltaurine		Endocannabinoid	39835	LC/MS Neg	100003239	5560	362.237		83982-06-3			1.4386	1.2465	0.4352	1.9338	0.9327	0.3983	0.377	1.2526	0.9341	1.0282	0.6351	1.7206	0.7297	0.9718	0.332552	1.47769	0.71271	0.304356	0.288079	0.957157	0.749378	0.82487	0.509507	1.38034	0.585399	0.779623		0.84333	0.40904	0.362158
1721	N-stearoyltaurine		Endocannabinoid	39730	LC/MS Neg	100003240	5782	390.268	168274	63155-80-6			1.26213	1.80508	0.4024	2.4686	1.6647	0.4384	0.6812	1.911	0.403	1.3874	0.8007	0.4356	0.3954	0.9612	0.235784	1.44646	0.97542	0.256878	0.399145	1.11974	0.223258	0.768607	0.443581	0.241318	0.219048	0.532496		1.82572	0.0911392	0.182834
1708	oleoyl ethanolamide		Endocannabinoid	38102	LC/MS Pos Late	1137	1661	326.305	5283454	11-58-0;111-58-0		HMDB02088	2.04375	2.32475	1.3413	0.7185	0.5876	1.0106	0.9799	1.4424	1.6319	0.9134	0.6848	0.8563	1.1827	1.0944	0.734288	0.393339	0.321679	0.553248	0.536442	0.789635	0.701968	0.392902	0.294569	0.368341	0.508743	0.47076		1.21603	0.664391	0.483104
1734	palmitoleoyl ethanolamide*		Endocannabinoid	57541	LC/MS Pos Late	100015862	1546	298.274	9835868			HMDB13648	2.10352	3.99453	0.9998	0.5375	0.2824	0.8201	0.7129	1.793	2.2588	0.8493	0.8417	2.126	2.0718	1.0835	0.675062	0.362918	0.190676	0.553729	0.481348	1.21063	0.565473	0.212616	0.210713	0.532227	0.518659	0.271246		1.50344	0.85812	0.550249
1711	palmitoyl ethanolamide		Endocannabinoid	38165	LC/MS Pos Late	1489	1643	300.29	4671	544-31-0	C16512	HMDB02100	5.76295	3.47277	0.4109	0.5417	0.4838	0.7168	2.2542	0.7944	0.445	0.5423	0.1816	0.4949	0.4673	0.6206	0.177138	0.233525	0.208564	0.30901	0.971778	0.342463	0.12814	0.156158	0.0522926	0.142509	0.134561	0.178705		2.83011	0.736601	0.505035
1712	stearoyl ethanolamide		Endocannabinoid	38625	LC/MS Pos Late	100002254	1787	328.321	27902	111-57-9		HMDB13078	6.96417	3.62523	0.4914	0.5593	0.4066	0.933	2.1743	0.3852	0.3394	0.4388	0.1115	0.4761	0.3082	0.5216	0.258809	0.29457	0.214147	0.491389	1.14515	0.202876	0.0936216	0.12104	0.0307566	0.131329	0.0850152	0.14388		4.30441	0.701646	0.494259
1548	arachidonoylcholine		Fatty Acid Metabolism (Acyl Choline)	53261	LC/MS Pos Late	100009332	1390	390.337					0.509333	0.747783	0.7663	0.4926	0.4112	1.5769	0.6037	0.4112	0.4112	0.4112	0.4112	0.4112	0.4112	0.4112	0.458501	0.294738	0.246034	0.943508	0.361212	0.246034	0.549892	0.549892	0.549892	0.549892	0.549892	0.549892		0.772887	0.064253	0.175205
1544	linoleoylcholine*		Fatty Acid Metabolism (Acyl Choline)	57463	LC/MS Pos Late	100015760	1388	366.337					0.877767	1.99337	1.1524	0.7761	0.2218	1.7019	0.7714	0.9681	0.2218	0.2218	0.2218	0.2218	0.3489	0.8435	0.635019	0.427662	0.122221	0.937815	0.425072	0.533462	0.111269	0.111269	0.111269	0.111269	0.175031	0.423153		2.95348	0.0104801	0.119665
1541	oleoylcholine		Fatty Acid Metabolism (Acyl Choline)	53260	LC/MS Pos Late	100009331	1449	368.352					1.21758	1.69575	1.1097	1.1634	0.28	1.6282	0.5731	1.018	0.4164	0.136	0.2333	0.1566	0.3831	1.0695	0.592641	0.621319	0.149535	0.869548	0.306067	0.543668	0.245555	0.0802005	0.137579	0.0923485	0.225918	0.630694		2.18281	0.0160294	0.141287
1542	palmitoloelycholine		Fatty Acid Metabolism (Acyl Choline)	53257	LC/MS Pos Late	100009334	1385	340.321					0.75425	1.20078	0.8103	0.712	0.259	1.1656	0.4596	0.5197	0.259	0.259	0.259	0.259	0.259	0.259	0.465467	0.409	0.148779	0.669564	0.264011	0.298535	0.215693	0.215693	0.215693	0.215693	0.215693	0.215693		1.74273	0.012586	0.125969
1540	palmitoylcholine		Fatty Acid Metabolism (Acyl Choline)	52944	LC/MS Pos Late	100009233	1482	342.337	151731				1.2261	0.979367	1.6965	1.5318	0.4358	1.8149	1.464	1.5125	0.525	0.2481	0.3096	0.1229	0.5731	1.019	0.788056	0.711549	0.202437	0.843055	0.680055	0.702584	0.536061	0.253327	0.316123	0.125489	0.585174	1.04047		1.37495	0.0103716	0.119665
1546	stearoylcholine*		Fatty Acid Metabolism (Acyl Choline)	57464	LC/MS Pos Late	100015759	1520	370.368					1.38087	0.436783	0.8418	0.2807	0.2807	1.0173	0.6631	0.5349	0.2807	0.2807	0.2807	0.2807	0.4574	0.6554	0.429936	0.143363	0.143363	0.51957	0.338668	0.273192	0.642653	0.642653	0.642653	0.642653	1.0472	1.50052		0.361073	0.0391813	0.17396
1437	butyrylcarnitine (C4)		Fatty Acid Metabolism (also BCAA Metabolism)	32412	LC/MS Pos Early	100001054	2860	232.154	439829	25576-40-3	C02862	HMDB02013	1.1927	0.913133	0.2673	1.9928	2.3786	1.4305	0.4022	0.7533	0.9987	2.1036	3.3806	0.5542	0.8204	1.0854	0.240887	1.79588	2.14356	1.28915	0.362457	0.678863	1.09371	2.30372	3.7022	0.606921	0.898445	1.18865		0.664798	0.298433	0.306693
1443	methylmalonate (MMA)		Fatty Acid Metabolism (also BCAA Metabolism)	1496	LC/MS Polar	418	3078.4	117.019	487	516-05-2	C02170	HMDB00202	0.90875	1.2682	2.0118	1.0209	1.9501	1.4999	4.5466	0.6478	0.4463	1.7283	0.8421	1.0272	0.8856	0.8338	0.918574	0.466136	0.890402	0.684844	2.07595	0.295781	0.351916	1.3628	0.664012	0.809967	0.698313	0.657467		1.17322	0.0760959	0.17784
1440	propionylcarnitine (C3)		Fatty Acid Metabolism (also BCAA Metabolism)	32452	LC/MS Pos Early	100001162	2590	218.139	107738	17298-37-2	C03017	HMDB00824	0.995933	0.63745	0.4142	1.0188	2.0805	1.3332	0.4447	0.7116	0.6266	1.6251	1.5235	0.438	0.9285	0.887	0.184962	0.454947	0.92905	0.595342	0.198581	0.317766	0.982979	2.54938	2.38999	0.687113	1.45658	1.39148		0.283441	0.185449	0.241494
1473	3-hydroxybutyrylcarnitine (1)		Fatty Acid Metabolism(Acyl Carnitine)	43264	LC/MS Pos Early	100003926	2400	248.149	53481617			HMDB13127	1.5145	0.697133	0.4185	3.3649	1.8457	5.9343	0.8377	0.6123	0.5179	0.734	2.2564	0.2179	0.6687	0.4972	0.376112	3.02409	1.65876	5.33324	0.752853	0.550283	0.742899	1.05288	3.23668	0.312566	0.959214	0.713206		1.66661	0.722958	0.501084
1474	3-hydroxybutyrylcarnitine (2)		Fatty Acid Metabolism(Acyl Carnitine)	52984	LC/MS Pos Early	100009271	2340	248.149				HMDB13127	1.18637	1.06803	0.6012	1.3423	1.1783	1.5634	0.6767	0.676	0.6964	2.1743	1.8367	0.5619	0.6533	0.8739	0.526061	1.17454	1.03103	1.368	0.592125	0.591512	0.65204	2.0358	1.7197	0.526107	0.611685	0.818233		0.830238	0.499442	0.405543
1478	3-hydroxyhexanoylcarnitine (1)		Fatty Acid Metabolism(Acyl Carnitine)	62557	LC/MS Pos Early	100020825	2918	276.181					1.20222	1.17277	1.0129	1.4786	1.2119	1.8633	1.0858	0.7912	0.6636	0.7618	0.966	0.4679	0.6	0.9228	0.519014	0.757641	0.620983	0.954763	0.556369	0.405414	0.565841	0.649575	0.823693	0.398971	0.511611	0.786857		1.02078	0.0242084	0.168247
1477	3-hydroxyhexanoylcarnitine (2)		Fatty Acid Metabolism(Acyl Carnitine)	62556	LC/MS Pos Early	100020826	2968	276.181					1.17042	1.05595	0.9194	1.2937	0.9443	2.0933	0.3331	0.7598	0.353	0.6779	1.0065	0.3331	0.7277	0.6439	0.642518	0.904095	0.659919	1.46289	0.232785	0.530982	0.334296	0.641981	0.95317	0.315451	0.689142	0.609783		1.25096	0.214728	0.261882
1493	3-hydroxyoleoylcarnitine		Fatty Acid Metabolism(Acyl Carnitine)	61840	LC/MS Pos Late	100019801	1406	442.353					1.5736	1.43143	0.8466	2.6031	0.9983	1.3671	0.5063	1.0073	0.4141	0.5193	1.1115	0.146	0.7126	0.6305	0.843703	2.59419	0.994884	1.36242	0.504568	1.00385	0.28929	0.362783	0.776494	0.101996	0.497823	0.440468		2.95831	0.126185	0.208977
1529	3-hydroxypalmitoylcarnitine		Fatty Acid Metabolism(Acyl Carnitine)	61839	LC/MS Pos Late	100019800	1380	416.337					1.3575	1.44225	0.7775	1.8356	1.197	1.4525	1.0101	1.3525	0.2988	0.5883	0.7752	0.1561	0.7571	0.6205	0.563883	1.33127	0.868125	1.05343	0.732576	0.980902	0.207176	0.407904	0.537493	0.108234	0.524944	0.430231		2.49559	0.00221255	0.0727612
1471	acetylcarnitine (C2)		Fatty Acid Metabolism(Acyl Carnitine)	32198	LC/MS Pos Early	100000802	2282	204.123	1	5080-50-2	C02571	HMDB00201	1.14737	0.72015	0.5038	1.2944	1.436	1.3426	0.5963	0.8521	0.7186	1.4453	1.5494	0.2421	0.8443	1.2546	0.303985	0.781022	0.866461	0.810105	0.359798	0.514144	0.997848	2.00694	2.1515	0.33618	1.17239	1.74214		0.432439	0.138886	0.217124
1509	adrenoylcarnitine (C22:4)*		Fatty Acid Metabolism(Acyl Carnitine)	57528	LC/MS Pos Late	100015850	1415	476.373					1.00405	1.29028	0.4579	1.3629	2.2196	1.5227	1.3331	1.8852	0.3802	0.8056	1.113	0.0256	3.2605	1.2198	0.882614	2.62702	4.27833	2.93504	2.56958	3.63377	0.294664	0.624359	0.862601	0.0198406	2.52696	0.945374		3.20952	0.215574	0.262106
1508	arachidonoylcarnitine (C20:4)		Fatty Acid Metabolism(Acyl Carnitine)	57518	LC/MS Pos Late	100015837	1353	448.342					0.972967	1.62603	0.7312	1.7226	1.5284	1.5754	1.5572	3.1035	0.3503	0.7	0.974	0.079	3.6018	0.8704	0.542621	1.27834	1.13422	1.1691	1.15559	2.3031	0.215432	0.430495	0.599004	0.0485845	2.21508	0.53529		1.87517	0.039463	0.17396
1507	arachidoylcarnitine (C20)*		Fatty Acid Metabolism(Acyl Carnitine)	57513	LC/MS Pos Late	100015833	1512	456.405				HMDB06460	1.92003	0.9783	0.7232	1.1354	1.3871	2.0392	0.9939	1.4024	0.907	0.5259	0.9503	0.0717	0.8535	0.9735	0.475915	0.74717	0.912806	1.34193	0.654054	0.922874	0.927118	0.537565	0.971379	0.0732904	0.872432	0.995094		1.15488	0.730485	0.503089
1510	behenoylcarnitine (C22)*		Fatty Acid Metabolism(Acyl Carnitine)	57514	LC/MS Pos Late	100015832	1561	484.436					3.28612	1.31168	0.4661	0.753	0.9661	2.7134	0.6264	1.1877	1.24	0.3598	0.2515	0.2515	0.9944	0.8639	0.296423	0.478881	0.614405	1.72562	0.398368	0.755334	0.94535	0.274304	0.191738	0.191738	0.75811	0.658619		1.41365	0.355821	0.33811
1484	cis-4-decenoylcarnitine (C10:1)		Fatty Acid Metabolism(Acyl Carnitine)	38178	LC/MS Pos Late	100002259	1057	314.233		98930-66-6			1.08832	0.919267	0.2292	2.5836	1.0883	0.4636	0.5314	2.3772	0.389	0.9022	1.8722	0.2292	1.4987	0.8257	0.153688	1.73241	0.72975	0.310863	0.356325	1.59401	0.423163	0.981434	2.03662	0.249329	1.63032	0.898216		0.784206	0.874476	0.556858
1481	decanoylcarnitine (C10)		Fatty Acid Metabolism(Acyl Carnitine)	33941	LC/MS Pos Late	100001251	1130	316.248	10245190	1492-27-9		HMDB00651	2.03342	0.9877	0.3736	2.477	1.1592	0.8026	0.3538	1.9009	0.391	0.7546	2.1116	0.1581	1.0066	0.9631	0.216064	1.43252	0.6704	0.464168	0.204613	1.09935	0.395869	0.763997	2.1379	0.160069	1.01914	0.975094		0.749646	0.346004	0.333033
1512	dihomo-linolenoylcarnitine (C20:3n3 or 6)*		Fatty Acid Metabolism(Acyl Carnitine)	57521	LC/MS Pos Late	100015840	1392	450.358					1.33803	1.2831	0.3226	1.4365	1.8071	1.106	0.7322	1.7079	0.3232	0.6562	1.4553	0.0545	3.4273	1.1571	0.20011	0.891065	1.12095	0.686055	0.454185	1.05941	0.25189	0.511418	1.13421	0.0424753	2.67111	0.9018		0.800265	0.940541	0.58031
1513	dihomo-linoleoylcarnitine (C20:2)*		Fatty Acid Metabolism(Acyl Carnitine)	57520	LC/MS Pos Late	100015839	1436	452.373					2.23442	1.04552	0.3512	1.3291	1.7081	0.9829	0.5656	1.287	0.3111	0.6835	1.214	0.1019	1.0171	1.112	0.220444	0.834259	1.07215	0.616954	0.35502	0.807834	0.297556	0.653744	1.16115	0.0974638	0.97282	1.06359		0.920011	0.261093	0.286454
1516	docosadienoylcarnitine (C22:2)*		Fatty Acid Metabolism(Acyl Carnitine)	57526	LC/MS Pos Late	100015848	1493	480.405					1.3101	1.04067	0.5588	1.1105	1.8127	1.951	0.7924	0.9132	0.4649	0.7174	1.0452	0.1095	0.5251	0.9171	0.340732	0.677134	1.1053	1.18963	0.483171	0.556829	0.446733	0.689366	1.00436	0.105221	0.50458	0.881262		1.19862	0.202535	0.253734
1519	docosahexaenoylcarnitine (C22:6)*		Fatty Acid Metabolism(Acyl Carnitine)	57523	LC/MS Pos Late	100015845	1349	472.342					0.556633	0.9463	0.2708	1	0.8399	1.5394	1.0269	1.1907	0.2708	0.419	0.2708	0.2708	5.5843	0.4343	0.138193	0.510313	0.428612	0.785575	0.52404	0.607629	0.286167	0.442777	0.286167	0.286167	5.90119	0.458945		0.390836	0.639865	0.475151
1518	docosapentaenoylcarnitine (C22:5n3)*		Fatty Acid Metabolism(Acyl Carnitine)	57529	LC/MS Pos Late	100015851	1387	474.358					1.30142	1.44707	0.2126	1.7691	1.8434	1.9615	1.3712	2.0523	0.1994	0.6686	0.5908	0.1994	3.5705	0.8454	0.121683	1.01255	1.05508	1.12267	0.784814	1.17464	0.137796	0.462038	0.408274	0.137796	2.46741	0.584216		1.25585	0.286438	0.300401
1527	docosapentaenoylcarnitine (C22:5n6)*		Fatty Acid Metabolism(Acyl Carnitine)	57530	LC/MS Pos Late	100015852	1417	474.358					0.658367	1.26382	0.3446	1.5936	1.0723	1.5301	0.9089	1.9189	0.0764	0.7709	0.2478	0.0764	4.0143	0.7498	0.219593	1.01551	0.683313	0.975041	0.579188	1.2228	0.0604518	0.609978	0.196073	0.0604518	3.17633	0.593282		0.99976	0.105694	0.193486
1517	docosatrienoylcarnitine (C22:3)*		Fatty Acid Metabolism(Acyl Carnitine)	57527	LC/MS Pos Late	100015849	1460	478.389					1.06668	1.09153	0.3866	1.0262	2.2754	1.4703	0.9494	1.0822	0.3999	0.73	1.1655	0.2039	1.0135	0.9189	0.225464	0.598478	1.32701	0.857476	0.553688	0.631137	0.366365	0.668784	1.06776	0.186801	0.92851	0.841843		1.0328	0.148146	0.22217
1514	eicosenoylcarnitine (C20:1)*		Fatty Acid Metabolism(Acyl Carnitine)	57519	LC/MS Pos Late	100015838	1484	454.389					1.63967	0.985383	0.5662	1.1976	1.5978	0.9611	0.5361	0.9596	0.5582	0.569	1.6627	0.136	0.5842	1.0834	0.397938	0.841701	1.12297	0.675483	0.376783	0.674429	0.56648	0.57744	1.68736	0.138017	0.592866	1.09947		0.877225	0.468395	0.388557
1515	erucoylcarnitine (C22:1)*		Fatty Acid Metabolism(Acyl Carnitine)	57525	LC/MS Pos Late	100015841	1535	482.42					1.59392	0.968533	0.6714	1.2303	1.4448	1.8912	0.5666	0.7552	0.6214	0.4841	1.0716	0.1242	0.4371	0.7983	0.51625	0.945997	1.11093	1.45417	0.435667	0.580685	0.641589	0.499828	1.10642	0.128235	0.451301	0.824236		1.38123	0.69415	0.492809
1476	hexanoylcarnitine (C6)		Fatty Acid Metabolism(Acyl Carnitine)	32328	LC/MS Pos Early	100000781	3358	260.186	6426853	6920-35-0		HMDB00705	1.35952	1.05897	0.2801	2.0528	1.9756	1.3364	0.2689	0.9795	0.5705	1.3675	2.955	0.1553	0.8337	1.2046	0.142254	1.04255	1.00334	0.678714	0.136566	0.497456	0.538733	1.29135	2.79046	0.146652	0.787277	1.13752		0.523145	0.557967	0.437629
1485	laurylcarnitine (C12)		Fatty Acid Metabolism(Acyl Carnitine)	34534	LC/MS Pos Late	100001392	1235	344.28	10427569	25518-54-1		HMDB02250	2.25218	1.4588	0.4005	3.0414	1.2704	1.0119	0.4094	1.7535	0.2646	0.8591	1.5418	0.1331	1.758	0.9107	0.235912	1.79152	0.748321	0.596053	0.241155	1.03289	0.181382	0.588909	1.0569	0.0912394	1.2051	0.62428		1.23962	0.876362	0.557289
1521	lignoceroylcarnitine (C24)*		Fatty Acid Metabolism(Acyl Carnitine)	57515	LC/MS Pos Late	100015834	1603	512.467					1.77562	1.21852	0.4181	1.0006	1.4648	2.4774	0.4374	0.8619	0.9134	0.3511	0.1714	0.0787	0.9626	0.5487	0.293273	0.701863	1.02747	1.73775	0.306811	0.604573	0.7496	0.288137	0.140663	0.0645867	0.789977	0.450302		1.88129	0.356911	0.33811
1492	linolenoylcarnitine (C18:3)*		Fatty Acid Metabolism(Acyl Carnitine)	57511	LC/MS Pos Late	100015831	1310	422.326					1.6362	0.952383	0.3087	2.014	0.3087	0.3087	0.3087	3.2177	0.3087	0.3087	1.138	0.3087	5.2684	0.3087	0.256402	1.6728	0.256402	0.256402	0.256402	2.67258	0.324134	0.324134	1.1949	0.324134	5.53181	0.324134		0.66943	0.480983	0.39579
1491	linoleoylcarnitine (C18:2)*		Fatty Acid Metabolism(Acyl Carnitine)	46223	LC/MS Pos Late	100003151	1430	424.342	6450015	36816-10-1		HMDB06469	2.91118	1.202	0.5106	2.1042	1.263	0.9925	0.6823	2.7283	0.2478	0.6128	1.1178	0.2341	3.6923	0.8534	0.505411	2.08282	1.25016	0.982414	0.675366	2.70057	0.206156	0.509817	0.92995	0.194759	3.0718	0.709983		1.45786	0.35362	0.336779
1522	margaroylcarnitine (C17)*		Fatty Acid Metabolism(Acyl Carnitine)	57512	LC/MS Pos Late	100004054	1424	414.358		106182-29-0		HMDB06210	1.87497	1.11528	0.6187	1.3822	1.1744	0.9595	1.0084	1.8964	0.3971	0.5252	0.5747	0.1066	0.9631	0.8108	0.30823	0.688598	0.585074	0.478013	0.502375	0.944767	0.356053	0.470912	0.515295	0.0955811	0.863547	0.72699		1.15806	0.42653	0.367857
1496	myristoleoylcarnitine (C14:1)*		Fatty Acid Metabolism(Acyl Carnitine)	48182	LC/MS Pos Late	100006051	1316	370.295	90659872	889848-55-9			3.20077	1.3622	0.4445	4.6679	2.0002	0.818	0.3066	2.2272	0.3404	0.8959	2.7312	0.1974	1.677	1.2271	0.311981	3.27626	1.40388	0.574129	0.215193	1.5632	0.24989	0.657686	2.00499	0.144913	1.2311	0.900822		1.41532	0.384645	0.349636
1486	myristoylcarnitine (C14)		Fatty Acid Metabolism(Acyl Carnitine)	33952	LC/MS Pos Late	100001270	1350	372.311	6426854	18822-89-4		HMDB05066	2.33947	1.48513	0.4394	2.2937	1.5993	0.9214	0.661	1.8871	0.3158	0.9197	1.623	0.1422	1.6405	1.0815	0.269946	1.40914	0.982532	0.566063	0.406086	1.15934	0.212641	0.619271	1.09283	0.095749	1.10461	0.728217		1.24389	0.698689	0.494259
1523	nervonoylcarnitine (C24:1)*		Fatty Acid Metabolism(Acyl Carnitine)	57531	LC/MS Pos Late	100015846	1602	510.452					1.5613	1.19435	0.4248	1.5757	0.9968	2.4552	0.2299	0.6107	0.7242	0.4105	0.2976	0.2299	0.6728	0.8239	0.185773	0.689082	0.435918	1.0737	0.100539	0.26707	0.606355	0.343702	0.249173	0.19249	0.563319	0.689831		1.04054	0.360529	0.338856
1479	octanoylcarnitine (C8)		Fatty Acid Metabolism(Acyl Carnitine)	33936	LC/MS Pos Late	100001247	950	288.217	123701	3671-77-0	C02838	HMDB00791	1.71408	1.09123	0.3102	2.0231	1.3675	1.0138	0.4213	2.0036	0.4156	0.7382	2.5622	0.1037	0.6323	0.9889	0.248531	1.6209	1.09564	0.812253	0.337544	1.60528	0.380853	0.676482	2.34799	0.0950301	0.579436	0.906222		1.14724	0.720771	0.500517
1494	oleoylcarnitine (C18)		Fatty Acid Metabolism(Acyl Carnitine)	35160	LC/MS Pos Late	100001501	1423	426.358	6441392	38677-66-6		HMDB05065	2.367	1.20003	0.5248	2.1421	1.2213	0.8312	0.4503	1.5637	0.3987	0.5574	1.5406	0.188	1.1794	1.0585	0.395339	1.61368	0.920023	0.626155	0.339218	1.17796	0.332241	0.464487	1.2838	0.156662	0.982806	0.882059		1.23654	0.345376	0.333033
1489	palmitoleoylcarnitine (C16:1)*		Fatty Acid Metabolism(Acyl Carnitine)	53223	LC/MS Pos Late	100009406	1357	398.326	71464547				3.23192	1.61942	0.5965	3.0983	1.4968	0.8789	0.5854	2.1715	0.4395	0.805	2.4122	0.2942	2.5981	1.238	0.296258	1.5388	0.743401	0.436514	0.290745	1.0785	0.271394	0.497093	1.48955	0.18167	1.60434	0.764473		0.91176	0.25475	0.283644
1488	palmitoylcarnitine (C16)		Fatty Acid Metabolism(Acyl Carnitine)	44681	LC/MS Pos Late	100000776	1425	400.342	461	6865-14-1	C02990	HMDB00222	2.04635	1.392	0.5241	1.5974	1.3779	0.8797	0.9317	2.1299	0.3224	0.6722	0.9772	0.1732	1.1002	1.1316	0.341241	1.04006	0.897148	0.572771	0.606628	1.38677	0.231609	0.482902	0.702011	0.124425	0.790374	0.812931		1.54079	0.633447	0.472061
1526	pentadecanoylcarnitine (C15)*		Fatty Acid Metabolism(Acyl Carnitine)	57522	LC/MS Pos Late	100015842	1362	386.326					1.93253	1.24663	0.3285	1.6581	0.9847	0.7477	0.4597	1.7116	0.2613	0.4761	0.7825	0.0726	1.5975	0.7154	0.203095	1.02512	0.608792	0.462266	0.28421	1.0582	0.209605	0.381909	0.627691	0.0582369	1.28145	0.573866		1.16245	0.949085	0.581619
1490	stearoylcarnitine (C18)		Fatty Acid Metabolism(Acyl Carnitine)	34409	LC/MS Pos Late	100001391	1485	428.373	6426855	18822-91-8		HMDB00848	1.55655	1.00673	0.7064	1.165	1.45	1.0895	1.3834	1.7905	0.3744	0.5704	0.7755	0.0675	0.7678	0.8959	0.383656	0.632728	0.787516	0.591723	0.751344	0.972446	0.371896	0.566585	0.770313	0.0670485	0.762665	0.889908		1.20155	0.161155	0.229354
1459	3,4-methylene heptanoylglycine		Fatty Acid Metabolism(Acyl Glycine)	55012	LC/MS Neg	100010861	3818	198.114					0.847867	1.13503	0.2826	0.6079	0.7802	0.6016	0.7439	1.4465	1.2704	0.8305	1.4078	0.2475	0.3375	0.8875	0.184381	0.39662	0.509036	0.39251	0.485353	0.943759	1.11926	0.731697	1.24032	0.218055	0.297348	0.781915		0.663461	0.575486	0.443898
1455	hexanoylglycine (C6)		Fatty Acid Metabolism(Acyl Glycine)	35436	LC/MS Neg	100001527	2900	172.098	99463	24003-67-6		HMDB00701	1.28518	0.70405	0.2149	1	0.7939	1.068	0.2149	0.4429	0.4729	0.4074	1.3144	0.2149	0.4137	0.2149	0.135836	0.632091	0.501817	0.675073	0.135836	0.279953	0.671685	0.578652	1.86691	0.305234	0.5876	0.305234		0.54703	0.407034	0.361076
1452	isocaproylglycine		Fatty Acid Metabolism(Acyl Glycine)	61789	LC/MS Neg	100019816	2820	172.098					0.95235	0.141283	0.0568	0.0568	0.0568	0.0568	0.0568	0.0568	0.0568	0.0568	0.0568	0.0568	0.0568	0.0568	0.0322547	0.0322547	0.0322547	0.0322547	0.0322547	0.0322547	0.402029	0.402029	0.402029	0.402029	0.402029	0.402029		0.0802298	NA	NA
1461	N-palmitoylglycine		Fatty Acid Metabolism(Acyl Glycine)	42092	LC/MS Neg	100003686	5580	312.254	151008	2441-41-0		HMDB13034	0.6155	1.08383	0.24	1.5866	1.1696	0.24	0.9815	0.8174	0.5007	0.6755	0.4598	0.24	0.4528	0.6048	0.100912	0.66711	0.491776	0.100912	0.412687	0.343688	0.461971	0.623251	0.424235	0.221436	0.417776	0.558019		0.782168	0.0483182	0.17396
1180	malonate		Fatty Acid Synthesis	15872	LC/MS Polar	818	3447	103.004	867	141-82-2;26522-22-85-0	C00383	HMDB00691	1.11387	0.861433	0.8092	1.0688	0.707	0.9962	1.0582	0.6871	1.1562	0.8247	1.1034	0.6262	1.5031	1.1687	0.385147	0.508706	0.336504	0.474151	0.503661	0.327032	1.34218	0.957358	1.28089	0.726928	1.74488	1.35669		0.342182	0.0278907	0.169564
1179	malonylcarnitine		Fatty Acid Synthesis	37059	LC/MS Pos Early	100001526	2086	248.113	22833583	853728-01-5		HMDB02095	1.17142	1.1436	0.5878	1.3027	1.039	1.9553	0.4284	1.0428	0.5916	3.3185	0.7395	0.9701	0.8241	0.9607	0.234141	0.518911	0.41387	0.778864	0.170647	0.415384	0.517314	2.9018	0.646642	0.848286	0.720619	0.840066		0.391031	0.684801	0.488548
1421	2-aminoheptanoate		Fatty Acid, Amino	43761	LC/MS Pos Early	100004542	3160	146.118	227939	1115-90-8			2.16512	0.856117	4.9006	1.0252	2.5573	4.8389	9.8138	0.9687	0.8886	0.991	1.4515	0.2841	1.2695	0.9848	7.86087	1.64449	4.10207	7.7619	15.742	1.55386	1.03794	1.15755	1.69545	0.331847	1.48286	1.15031		5.63964	0.319559	0.31949
1426	2-aminooctanoate		Fatty Acid, Amino	43343	LC/MS Neg	100004227	3385	158.119	69522	644-90-6		HMDB00991	0.896483	0.7902	1.4445	0.6204	1.125	1.5019	4.7944	0.9329	1.5816	0.6204	1.8799	0.6204	0.9329	0.7133	1.48161	0.63634	1.15391	1.54049	4.91759	0.95687	2.00152	0.785118	2.37902	0.785118	1.18059	0.902683		1.33019	0.454414	0.382316
1346	2-hydroxyglutarate		Fatty Acid, Dicarboxylate	52294	LC/MS Pos Early	100002070	958	166.071	43	40951-21-1	C02630	HMDB00606	1.47957	1.20285	1.0242	1.3393	1.232	1.3015	0.8521	2.4168	0.5846	1.0834	1.0595	1.5287	0.8059	0.9988	0.97325	1.27268	1.17071	1.23676	0.809712	2.29657	0.486012	0.900694	0.880825	1.2709	0.669992	0.830361		1.53999	0.676464	0.486965
1351	3-hydroxyadipate*		Fatty Acid, Dicarboxylate	62069	LC/MS Polar	100004396	3131	161.046	151913			HMDB00345	1.67753	1.07577	0.1975	0.1975	0.4234	0.8417	0.5882	0.1975	0.1975	1.1245	0.1975	0.1975	0.1975	0.8861	0.140813	0.140813	0.301875	0.600114	0.419374	0.140813	0.18359	1.0453	0.18359	0.18359	0.18359	0.823692		0.66983	0.309597	0.31453
1361	azelate (nonanedioate; C9)		Fatty Acid, Dicarboxylate	18362	LC/MS Neg	2029	1276	187.098	2266	123-99-9	C08261	HMDB00784	1.91583	1.3434	0.9851	1.001	2.0088	0.7619	1.1173	1.1524	0.436	0.4778	0.4162	0.3573	3.5262	2.1984	0.753644	0.765808	1.53682	0.582886	0.854782	0.881635	0.32455	0.355665	0.309811	0.265967	2.62483	1.63644		0.974317	0.487212	0.399487
1367	dodecanedioate (C12)		Fatty Acid, Dicarboxylate	32388	LC/MS Neg	100001102	2990	229.145	12736	693-23-2	C02678	HMDB00623	0.816383	0.7365	0.2712	0.6068	0.2712	1.1318	0.9362	0.6147	0.2712	0.6139	0.2712	0.3237	0.4321	0.7122	0.16047	0.359046	0.16047	0.669691	0.553954	0.363721	0.368228	0.833537	0.368228	0.439511	0.586694	0.967006		0.636324	0.378357	0.34543
1342	glutarate (C5-DC)		Fatty Acid, Dicarboxylate	396	LC/MS Polar	339	2900	131.035	743	110-94-1	C00489	HMDB00661	2.0606	2.22152	1.0911	0.3174	1.0388	0.3174	1.9087	0.4723	0.855	0.3174	1.3429	0.7498	0.8962	0.3174	0.705681	0.205282	0.671855	0.205282	1.23447	0.305465	0.384872	0.142875	0.604497	0.337517	0.403418	0.142875		1.65077	0.588247	0.450146
1369	hexadecanedioate (C16)		Fatty Acid, Dicarboxylate	35678	LC/MS Neg	100001614	4615	285.207	10459	505-54-4	C19615	HMDB00672	0.825817	0.990883	0.4282	0.9744	1.7242	0.8572	0.4033	0.7189	1.3732	0.7236	1.6514	0.4539	0.5704	1.3229	0.408568	0.929727	1.64515	0.8179	0.38481	0.685941	1.38583	0.730258	1.66659	0.458076	0.575648	1.33507		0.79202	0.986929	0.588959
1371	hexadecenedioate (C16:1-DC)*		Fatty Acid, Dicarboxylate	61862	LC/MS Neg	100019975	4380	283.191					0.75885	0.8259	0.3382	0.5559	1.5378	0.4239	0.3228	0.5371	2.5239	0.7375	2.6458	0.5125	0.4568	1.1439	0.229862	0.377825	1.04519	0.288109	0.219395	0.365047	3.05594	0.892965	3.20354	0.620535	0.553094	1.38503		0.260055	0.187009	0.242191
1354	maleate		Fatty Acid, Dicarboxylate	20676	LC/MS Polar	100000707	2640	115.004	444266	110-16-7	C01384	HMDB00176	1.9548	0.813883	0.745	0.7921	1.1349	1.0754	1.5672	0.4128	0.6793	0.8488	1.0107	0.3091	0.7031	0.7208	0.333771	0.354873	0.508453	0.481796	0.70213	0.184941	0.834641	1.0429	1.24182	0.379784	0.863883	0.885631		0.488879	0.0244594	0.168247
1363	sebacate (C10-DC)		Fatty Acid, Dicarboxylate	32398	LC/MS Neg	100001211	1788	201.113	5192	111-20-6	C08277	HMDB00792	1.04572	0.676183	0.4477	0.6121	0.2005	0.2005	0.2005	0.4634	0.2005	0.3562	0.2005	0.2005	0.5652	0.2005	0.111995	0.15312	0.0501561	0.0501561	0.0501561	0.115922	0.296517	0.52678	0.296517	0.296517	0.835868	0.296517		0.208538	0.468307	0.388557
1368	tetradecanedioate (C14)		Fatty Acid, Dicarboxylate	35669	LC/MS Neg	100001613	4000	257.176	13185	821-38-5		HMDB00872	0.79955	0.982283	0.4047	0.8258	1.2997	0.9475	1.0347	0.9271	1.9946	0.9721	2.0827	0.7954	0.9215	0.9062	0.185771	0.379071	0.596608	0.434936	0.474963	0.425571	2.03058	0.989633	2.12026	0.809746	0.93812	0.922544		0.319672	0.575602	0.443898
1364	undecanedioate (C11-DC)		Fatty Acid, Dicarboxylate	42395	LC/MS Neg	100001617	2440	215.129	15816	1852-04-6		HMDB00888	1.21107	0.967067	0.842	0.7843	1.3624	0.6804	0.79	0.6246	0.2347	0.4361	0.2347	0.2347	1.7921	1.5203	0.683321	0.636495	1.10565	0.552176	0.641121	0.506891	0.242693	0.450951	0.242693	0.242693	1.85313	1.57207		0.896057	0.837367	0.542222
1615	9,10-DiHOME		Fatty Acid, Dihydroxy	38399	LC/MS Neg	179	5180	313.238	9966640	263399-34-4	C14828	HMDB04704	0.401583	0.808117	1.063	0.748	0.3118	0.3118	0.6189	0.3748	0.7756	0.3118	0.3118	0.5633	0.6849	0.3118	0.87563	0.616153	0.25684	0.25684	0.509809	0.308736	0.959762	0.385835	0.385835	0.697053	0.847526	0.385835		0.771198	0.0440634	0.17396
1593	13-HODE + 9-HODE		Fatty Acid, Monohydroxy	37752	LC/MS Neg	100002196	5275	295.228	43013				3.31017	1.15838	1.9645	1.091	0.9674	1.0591	0.5772	0.4156	1.1886	0.454	0.2843	0.2532	0.4471	0.8164	1.00166	0.556278	0.493257	0.540013	0.294302	0.211906	1.02609	0.391926	0.245428	0.21858	0.385969	0.704775		1.04193	0.226075	0.268607
1596	14-HDoHE/17-HDoHE		Fatty Acid, Monohydroxy	53034	LC/MS Neg	100009278	5296	343.228					2.23203	1.2166	0.1162	1.3989	1.4618	1.2461	0.18	0.4021	0.9512	0.7361	0.2998	0.0637	0.5152	1.0835	0.0873838	1.05199	1.09929	0.937082	0.135362	0.302384	0.781851	0.605047	0.246424	0.052359	0.423475	0.890597		1.2046	0.4383	0.373346
1589	16-hydroxypalmitate		Fatty Acid, Monohydroxy	39609	LC/MS Neg	100002953	5236.2	271.228	10466	506-13-8	C18218	HMDB06294	1.46377	1.26328	1	1.0221	0.5177	0.9836	0.9131	0.8136	1.105	0.9693	0.6204	1.0106	0.7364	1.0123	1.31631	1.3454	0.681453	1.29472	1.20192	1.07095	0.874705	0.767286	0.491101	0.799979	0.582925	0.801325		1.6007	0.162669	0.230085
1557	2-hydroxydecanoate		Fatty Acid, Monohydroxy	42489	LC/MS Neg	100004089	4840	187.134	21488	5393-81-7			1.61543	0.770833	1.4103	0.8988	0.5272	0.7741	1.182	0.5272	0.5272	0.6168	0.5272	0.5272	0.5272	0.5272	1.01458	0.646603	0.379271	0.556893	0.850339	0.379271	0.683935	0.800173	0.683935	0.683935	0.683935	0.683935		0.906895	0.148836	0.222843
1555	2-hydroxyheptanoate*		Fatty Acid, Monohydroxy	61827	LC/MS Polar	100019960	925	145.087	2750949				1.26932	0.657367	0.9252	0.4837	0.9949	0.4724	0.4724	0.4724	0.4724	0.5484	0.4724	0.4724	0.4724	0.4724	0.544353	0.284591	0.585362	0.277942	0.277942	0.277942	0.718625	0.834238	0.718625	0.718625	0.718625	0.718625		0.507781	0.0320563	0.171135
1560	2-hydroxypalmitate		Fatty Acid, Monohydroxy	35675	LC/MS Neg	100001579	5511.2	271.228	92836	764-67-0		HMDB31057	1.55878	1.6047	0.5455	3.4613	1.3717	0.8688	0.9302	1.8193	0.9436	0.8798	0.8923	0.4241	1.0564	0.7584	0.380865	2.41666	0.957713	0.606591	0.64946	1.27022	0.588023	0.548264	0.556054	0.264286	0.658316	0.472612		2.03446	0.170048	0.23346
1562	2-hydroxystearate		Fatty Acid, Monohydroxy	17945	LC/MS Neg	1239	5695	299.259	69417	629-22-1	C03045		1.32087	1.2114	0.7476	3.9594	1.6707	0.7175	1.4793	2.3529	0.7292	0.9661	0.7991	0.5981	1.2495	0.8027	0.582341	3.08417	1.30139	0.558895	1.1523	1.83279	0.601948	0.797507	0.65965	0.493726	1.03145	0.662622		2.00425	0.13551	0.215191
1572	3-hydroxydecanoate		Fatty Acid, Monohydroxy	22053	LC/MS Neg	100000997	4634.7	187.134	26612	5561-87-5		HMDB02203	1.22702	1.37698	1.8223	1.7022	1.0596	1.7329	3.7908	2.057	0.895	0.4316	0.3656	0.3656	0.587	0.6412	1.43454	1.34	0.834134	1.36417	2.98418	1.6193	0.649972	0.313439	0.265508	0.265508	0.426294	0.465656		4.01291	0.00888462	0.115302
1569	3-hydroxyhexanoate		Fatty Acid, Monohydroxy	53230	LC/MS Neg	100006367	1725	131.071	151492	10191-24-9			1.14398	0.915867	1	2.4645	0.9503	1.5163	1.5059	1.433	0.3452	0.4895	1.1739	0.556	0.6093	0.6889	0.968492	2.38685	0.920358	1.46852	1.45845	1.38785	0.376911	0.534466	1.28174	0.607075	0.665272	0.752184		2.03681	0.0328925	0.171135
1574	3-hydroxylaurate		Fatty Acid, Monohydroxy	32457	LC/MS Neg	100001112	5175	215.165	94216	53941-38-1		HMDB00387	1.4496	1.78743	1.8451	3.0543	1.2961	2.2316	3.0297	3.1765	0.8657	0.4033	0.8285	0.2689	0.4619	0.8838	3.03854	5.02986	2.13443	3.67503	4.98935	5.2311	0.484326	0.225631	0.463514	0.150439	0.258415	0.494452		11.6037	0.00116456	0.0727612
1570	3-hydroxyoctanoate		Fatty Acid, Monohydroxy	22001	LC/MS Neg	100000773	3446	159.103	26613	88930-08-9		HMDB01954	1.2613	1.01727	1.7368	1.3142	0.4417	1.6798	3.4452	1.4634	0.4417	0.4417	0.4417	0.4417	0.5424	0.6102	1.01505	0.768066	0.258146	0.981736	2.0135	0.855264	0.434203	0.434203	0.434203	0.434203	0.533194	0.599843		2.05299	0.043517	0.17396
1577	3-hydroxypalmitate		Fatty Acid, Monohydroxy	27503	LC/MS Neg	100000983	5476	271.228	301590	928-17-6		HMDB10734	1.36877	1.31908	0.6652	1.8741	0.9185	1.0073	0.8682	1.6913	0.7379	0.8912	0.707	1.7018	0.8428	0.6974	0.406188	1.14437	0.560859	0.615082	0.530145	1.03275	0.559404	0.675621	0.535978	1.29014	0.638929	0.5287		1.01434	0.444724	0.377317
1608	3-hydroxystearate		Fatty Acid, Monohydroxy	52938	LC/MS Neg	100008933	5674	299.259	5282907	45261-96-9			0.730183	1.4995	0.4877	0.3797	0.6626	0.2224	1.3743	1.9492	0.4228	2.7681	2.0371	13.7977	1.4949	0.9898	0.331243	0.25789	0.450034	0.151053	0.933416	1.32388	0.281961	1.84602	1.35852	9.20153	0.996932	0.660087		0.240328	0.423502	0.36736
1587	8-hydroxyoctanoate		Fatty Acid, Monohydroxy	21239	LC/MS Neg	100000956	2300	159.103	69820	764-89-6		HMDB61914	1.4768	0.422433	0.3398	0.4032	0.3398	0.3398	2.9342	0.4334	0.3398	0.3398	0.3398	0.3398	0.579	0.5259	0.258715	0.306986	0.258715	0.258715	2.23402	0.329979	0.804387	0.804387	0.804387	0.804387	1.37063	1.24493		0.625246	0.209019	0.258342
2338	glycerol		Glycerolipid Metabolism	15122	LC/MS Neg	1254	758	91.0401	753	56-81-5	C00116	HMDB00131	0.8658	0.975467	1.2213	1.2267	1.1934	1.6543	0.8384	0.7299	0.8625	1.1222	0.8764	0.6167	0.744	0.636	0.853618	0.857392	0.834118	1.15626	0.585993	0.510158	0.884192	1.15042	0.898442	0.63221	0.762712	0.651996		0.963366	0.0240695	0.168247
2339	glycerol 3-phosphate		Glycerolipid Metabolism	43847	LC/MS Pos Early	100000258	580	173.021	754	29849-82-9	C00093	HMDB00126	0.9169	1.19133	0.3398	0.37	0.9571	1.0157	0.098	1.814	1.2074	0.9843	1.0465	0.5469	1.1238	2.0662	0.246181	0.268061	0.693408	0.735863	0.0709999	1.31422	1.01349	0.826217	0.878428	0.459065	0.943313	1.73436		0.568542	0.679339	0.487177
2344	glycerophosphoglycerol		Glycerolipid Metabolism	48857	LC/MS Polar	100001619	2430	245.043	439964		C03274		1.0347	0.865167	1.2079	1.1599	1.141	1.1832	3.1544	0.6605	0.3712	0.9242	1.0535	0.2664	0.3709	0.906	0.718589	0.690033	0.67879	0.703895	1.87658	0.392936	0.42905	1.06823	1.21768	0.307918	0.428704	1.0472		1.12493	0.147872	0.22217
1752	inositol 1-phosphate (I1P)		Inositol Metabolism	43849	LC/MS Polar	370	4785	259.022	440194	573-35-3;106032-59-1	C01177	HMDB00213	1.87632	0.731483	0.9927	1.4296	1.3327	1.5157	0.1711	2.914	0.1711	0.9053	0.1711	0.9542	0.1711	0.2904	0.637374	0.917891	0.855675	0.973173	0.109857	1.87097	0.233908	1.23762	0.233908	1.30447	0.233908	0.397002		1.47355	0.647726	0.477906
1743	myo-inositol		Inositol Metabolism	1124	LC/MS Polar	363	3506.3	225.062	892	87-89-8	C00137	HMDB00211	1.37152	1.1353	0.6509	1.5386	0.9496	1.7937	0.6364	0.9587	0.8191	0.9074	0.6994	0.7618	1.1254	0.8859	0.354106	0.837037	0.516606	0.975818	0.346218	0.521557	0.721483	0.79926	0.616049	0.671012	0.99128	0.780322		0.775503	0.848858	0.546222
1537	3-hydroxybutyrate (BHBA)		Ketone Bodies	542	LC/MS Polar	254	1444	103.04	441	625-72-9	C01089	HMDB00357	1.4251	0.593267	0.157	2.0681	1.0723	2.9752	0.2578	0.3955	0.6647	0.3898	2.7302	0.1615	0.9988	0.2821	0.104255	1.37332	0.712058	1.97567	0.171191	0.262631	1.12041	0.65704	4.60198	0.272222	1.68356	0.475503		0.521993	0.3998	0.357891
1195	caproate (6:0)		Medium Chain Fatty Acid	32489	LC/MS Neg	926	2713.7	115.076	8892	142-62-1	C01585	HMDB00535	1.1428	0.775567	0.8514	0.6286	0.5585	0.7524	0.5585	1.1865	0.5585	0.9482	0.5585	0.8355	0.6614	0.7206	0.470196	0.347152	0.308439	0.415522	0.308439	0.655259	0.720119	1.22259	0.720119	1.07728	0.852796	0.929127		0.453639	0.054066	0.17396
1197	caprylate (8:0)		Medium Chain Fatty Acid	32492	LC/MS Neg	932	4362	143.108	379	124-07-2	C06423	HMDB00482	1.15798	0.43865	0.7031	1.201	0.2234	0.2234	0.2234	0.7407	0.2234	0.2234	0.2234	0.671	0.7944	0.8518	0.406561	0.694467	0.129179	0.129179	0.129179	0.428303	0.50929	0.50929	0.50929	1.52969	1.81101	1.94187		0.28146	0.0757437	0.17784
1196	heptanoate (7:0)		Medium Chain Fatty Acid	1644	LC/MS Neg	925	3670	129.092	8094	111-14-8	C17714	HMDB00666	1.04147	0.914267	0.5281	0.5924	0.5281	0.5281	0.9553	0.8648	0.5281	1.1285	0.7881	0.7884	0.9125	1.0288	0.314826	0.353159	0.314826	0.314826	0.569501	0.51555	0.577621	1.23432	0.862002	0.86233	0.998068	1.12527		0.420998	0.0319201	0.171135
2598	3-hydroxy-3-methylglutarate		Mevalonate Metabolism	531	LC/MS Polar	112	2850	161.046	1662	503-49-1	C03761	HMDB00355	1.2515	0.908817	3.6581	1.3854	1.2098	2.1791	7.4198	0.9543	0.2417	0.5275	0.7854	0.2347	0.3743	0.6342	2.10678	0.797881	0.696749	1.25499	4.27322	0.549601	0.26595	0.580425	0.864201	0.258248	0.411854	0.697831		3.14412	0.0849336	0.181453
1772	choline		Phospholipid Metabolism	15506	LC/MS Pos Early	1256	1961	104.107	305	67-48-1	C00114	HMDB00097	0.828217	1.03727	0.8941	0.9453	1.0717	1.1989	1.1636	1.0007	0.8508	0.7084	0.8289	0.3727	0.789	1.1826	0.52521	0.555286	0.629535	0.704255	0.683519	0.587829	0.820233	0.682949	0.799119	0.35931	0.760653	1.14011		0.807832	0.00285104	0.0772128
1773	phosphocholine		Phospholipid Metabolism	34396	LC/MS Pos Early	267	700	184.073	1014	72556-74-2	C00588	HMDB01565	0.737117	0.827933	1.5869	1.0202	0.8712	1.3804	2.3631	0.5254	1.2969	0.6479	1.0003	0.5539	1.2496	0.9746	0.971294	0.624434	0.533235	0.844901	1.44638	0.321582	1.56643	0.782551	1.20819	0.669015	1.5093	1.17715		0.685966	0.167485	0.232797
1774	CDP-choline		Phospholipid Metabolism	34418	LC/MS Pos Early	1220	725	489.115	13804	33818-15-4	C00307	HMDB01413	1.08902	0.55965	2.3663	1.4165	1.3896	1.2084	3.0153	0.265	0.9838	0.6794	1.2456	0.2418	0.7396	1.0094	1.19249	0.713842	0.700286	0.60897	1.51955	0.133546	1.75788	1.21397	2.22568	0.432056	1.32154	1.80363		0.556119	0.965734	0.584729
1779	CDP-ethanolamine		Phospholipid Metabolism	34410	LC/MS Polar	100001407	4210	445.053	123727	72842-05-8	C00570	HMDB01564	1.02238	0.599517	1.1979	1.3388	1.2009	1.0421	1.5025	0.2034	0.82	0.7977	1.8729	0.252	0.9915	0.9513	1.81358	2.0269	1.81812	1.5777	2.27473	0.307941	1.36777	1.33057	3.12402	0.420339	1.65383	1.58678		1.0354	0.231554	0.270234
1780	glycerophosphoethanolamine		Phospholipid Metabolism	37455	LC/MS Polar	100001620	3075	214.049	123874	33049-08-0	C01233	HMDB00114	0.993117	0.888033	1.4365	1.3696	1.1099	1.2042	2.6276	0.6045	0.3552	1.0477	0.9739	0.2186	0.3712	0.9235	1.10665	1.05511	0.855041	0.927687	2.02424	0.465693	0.399985	1.1798	1.09669	0.246162	0.418002	1.03994		1.46885	0.0712787	0.175205
1782	glycerophosphoinositol*		Phospholipid Metabolism	47155	LC/MS Polar	100001621	3850	333.059	167572	16824-65-0			1.21725	1.05162	1.2039	1.7505	0.9276	1.7157	1.7079	0.8601	0.6989	0.4695	0.7063	0.7236	1.0707	0.6544	0.776985	1.12976	0.598664	1.1073	1.10226	0.5551	0.664596	0.446455	0.671633	0.688083	1.01815	0.62228		1.28188	0.0266638	0.169564
1776	glycerophosphorylcholine (GPC)		Phospholipid Metabolism	15990	LC/MS Pos Early	100000269	672	258.11	71920	28319-77-9	C00670	HMDB00086	0.969083	0.962383	1.7856	1.0497	1.1498	0.9177	2.4984	0.8884	0.5376	1.0038	1.01	0.3954	0.5143	0.9658	1.25524	0.737918	0.808286	0.645124	1.75632	0.624527	0.558613	1.04304	1.04948	0.410855	0.534402	1.00355		1.26685	0.0605773	0.174063
1781	glycerophosphoserine*		Phospholipid Metabolism	57404	LC/MS Pos Early	100015666	577	260.053	3081457				1.01468	1.20845	2.0325	1.1438	1.0789	1.1814	3.2687	1.2491	0.6953	0.6883	0.4992	0.7162	0.6662	0.8654	1.21213	0.682133	0.643428	0.704556	1.94937	0.744931	0.575365	0.569573	0.413091	0.59266	0.551285	0.716124		1.7368	0.0276086	0.169564
1778	phosphoethanolamine (PE)		Phospholipid Metabolism	1600	LC/MS Neg	1026	638	140.012	1015	1071-23-4	C00346	HMDB00224	0.872917	0.927183	1.8357	1.357	1.11	1.5739	1.881	1.1715	0.9408	0.997	0.9333	0.2717	0.7237	1.0239	0.987351	0.729877	0.597026	0.846539	1.01172	0.630104	1.01469	1.0753	1.0066	0.293038	0.780536	1.10431		0.91054	0.00216084	0.0727612
1783	trimethylamine N-oxide		Phospholipid Metabolism	40406	LC/MS Pos Early	100003397	2100	76.0757	1145	1184-78-7	C01104	HMDB00925	0.5414	3.93517	0.2872	2.4559	0.8797	0.5495	0.6383	0.9231	2.7974	4.9899	8.2719	0.3134	1.1191	0.8336	1.07371	9.18151	3.2888	2.05433	2.38632	3.45106	0.710872	1.26803	2.10205	0.0796408	0.284384	0.211833		4.6031	0.175221	0.236455
2814	beta-muricholate		Primary Bile Acid Metabolism	31885	LC/MS Neg	100001066	4794	407.28	5283853	2393-59-1	C17726	HMDB00415	4.15523	1.6494	0.2573	0.1641	0.2612	0.2016	0.2933	0.9172	0.1641	1.8303	0.1641	0.1641	0.5556	3.2091	0.176491	0.112562	0.179166	0.138284	0.201184	0.629138	0.0994907	1.10968	0.0994907	0.0994907	0.33685	1.94562		0.389319	0.148117	0.22217
2808	cholate		Primary Bile Acid Metabolism	22842	LC/MS Neg	136	5165	407.28	221493	81-25-4	C00695	HMDB00619	3.00183	1.29237	0.1624	0.1624	0.1624	0.1624	0.1624	0.2847	0.1624	0.3972	0.1624	0.1624	0.1945	1.4751	0.154219	0.154219	0.154219	0.154219	0.154219	0.270358	0.125661	0.307343	0.125661	0.125661	0.150499	1.14139		0.526992	0.164646	0.231185
2817	tauro-beta-muricholate		Primary Bile Acid Metabolism	33983	LC/MS Neg	100001250	4774	514.284	168408	25696-60-0		HMDB00932	166.325	10.8404	1.03	4.3175	1.0003	1.0398	2.3303	0.8762	0.5275	1.3389	0.0698	0.605	1	9.3869	0.342707	1.43654	0.332825	0.345968	0.77535	0.291534	0.0486607	0.123511	0.0064389	0.0558099	0.0922478	0.865921		2.95569	0.220539	0.264417
2813	taurochenodeoxycholate		Primary Bile Acid Metabolism	18494	LC/MS Neg	1629	5250	498.289	387316	6009-98-9	C05465	HMDB00951	17.0295	0.951917	0.0976	0.4632	0.0976	0.0976	0.1129	0.0976	0.0976	0.0976	0.0976	0.0976	0.0976	0.6456	0.0362852	0.172206	0.0362852	0.0362852	0.0419734	0.0362852	0.10253	0.10253	0.10253	0.10253	0.10253	0.678211		0.301732	0.105947	0.193563
2810	taurocholate		Primary Bile Acid Metabolism	18497	LC/MS Neg	1648	5150	514.284	6675	145-42-6	C05122	HMDB00036	102.651	8.41198	1.8277	3.5813	0.7232	0.6551	2.8856	0.8324	0.7155	0.9247	0.1339	0.2465	0.423	4.9041	0.645253	1.26435	0.255319	0.231277	1.01873	0.293871	0.0850572	0.109927	0.0159178	0.0293034	0.0502854	0.58299		4.246	0.206981	0.257439
2706	20a-dihydroprogesterone		Progestin Steroids	39761	LC/MS Pos Late	100002766	1255	317.248	92747	145-14-2	C04042	HMDB03069	0.4381	9.48583	3.7974	0.6844	0.3296	1.3783	0.4009	2.5589	1.7338	2.7423	1	0.9914	1.8586	1.6543	46.766	8.42857	4.05911	16.9741	4.93719	31.5135	0.182778	0.289094	0.10542	0.104514	0.195934	0.174397		107.095	0.0510852	0.17396
2828	deoxycholate		Secondary Bile Acid Metabolism	1114	LC/MS Neg	302	5294	391.285	222528	83-44-3	C04483	HMDB00626	6.13793	4.36357	1.9253	0.4291	0.4518	1	3.2051	1.8569	0.8696	0.385	0.7301	0.2655	0.2655	1.0615	1.05109	0.234261	0.246654	0.545936	1.74978	1.01375	0.199287	0.0882306	0.167317	0.0608447	0.0608447	0.243264		5.90576	0.222953	0.266617
2831	taurodeoxycholate		Secondary Bile Acid Metabolism	12261	LC/MS Neg	1668	5257.4	498.289	2733768	207737-97-1	C05463	HMDB00896	49.2774	2.22077	0.9655	0.4424	0.6272	0.1492	1.0973	0.5836	0.4181	0.1492	0.183	0.1492	0.1492	1.287	0.573667	0.262859	0.37266	0.0886495	0.651978	0.346755	0.188268	0.067184	0.082404	0.067184	0.067184	0.57953		2.18356	0.108467	0.195583
2847	tauroursodeoxycholate		Secondary Bile Acid Metabolism	39378	LC/MS Neg	100002912	5025	498.289	9848818	14605-22-2		HMDB00874	29.0582	1.12092	0.1057	0.4222	0.1057	0.1057	0.2027	0.1057	0.1057	0.1057	0.1057	0.1057	0.1057	0.6537	0.0367231	0.146684	0.0367231	0.0367231	0.0704235	0.0367231	0.0942978	0.0942978	0.0942978	0.0942978	0.0942978	0.583183		0.34513	0.0916523	0.183464
2465	phytosphingosine		Sphingolipid Synthesis	1510	LC/MS Pos Late	469	1367	318.3	122121	554-62-1	C12144	HMDB04610	5.21428	1.70612	0.2632	2.6843	1.5054	5.9682	0.6927	0.0598	0.5243	0.7125	0.318	0.0598	0.8609	0.6653	0.161534	1.64743	0.923908	3.66286	0.42513	0.036701	0.307306	0.417615	0.186388	0.0350504	0.504596	0.38995		3.7251	0.797117	0.528808
2464	sphingadienine		Sphingolipid Synthesis	57426	LC/MS Pos Late	100015643	1350	298.274	6449795	25696-03-1			1.45608	1.33887	2.2618	0.6738	0.8617	1.5049	4.1676	3.6768	0.5394	0.9414	0.5056	0.4329	0.4197	0.8228	1.62739	0.484806	0.620002	1.08279	2.99863	2.6455	0.402878	0.703132	0.377633	0.323333	0.313474	0.61455		3.45855	0.0501951	0.17396
2462	sphinganine		Sphingolipid Synthesis	17769	LC/MS Pos Late	313	1413	302.305	3126	3102-56-5	C00836	HMDB00269	1.4397	1.15333	0.4856	0.7181	0.7235	2.0073	0.5969	0.4254	1.0019	0.3804	0.3148	0.1613	0.8527	1.1669	0.345947	0.511583	0.51543	1.43002	0.425238	0.30306	0.868699	0.329827	0.272948	0.139855	0.739335	1.01176		1.05022	0.953133	0.581619
2592	eicosanoylsphingosine (d20:1)*		Sphingosines	57597	LC/MS Pos Late	100015870	1443	328.321					3.21325	1.33898	0.4799	0.2279	0.5019	1.03	0.2279	0.2279	0.2777	0.2279	0.2279	0.2279	0.4314	0.2279	0.263284	0.125031	0.275353	0.56508	0.125031	0.125031	0.207396	0.170204	0.170204	0.170204	0.322185	0.170204		1.22176	0.220925	0.264535
2591	heptadecasphingosine (d17:1)		Sphingosines	57427	LC/MS Pos Late	100015724	1377	286.274	5283557	6918-48-5			1.10357	0.40935	0.6164	0.3302	0.3302	1.0513	1.0953	0.8373	0.3302	0.3302	0.3302	0.3302	0.3302	0.3302	0.306085	0.163967	0.163967	0.522044	0.543893	0.415778	0.806645	0.806645	0.806645	0.806645	0.806645	0.806645		0.437147	0.251305	0.281511
2590	hexadecasphingosine (d16:1)*		Sphingosines	57428	LC/MS Pos Late	100015723	1289	272.258					1.35413	0.945967	1.5606	0.7415	1.0304	1.1371	2.4524	0.991	0.4562	0.9143	0.5833	0.4562	0.4562	0.6071	0.809524	0.384635	0.534495	0.589843	1.27212	0.514057	0.482258	0.966525	0.616618	0.482258	0.482258	0.641777		1.11793	0.117084	0.202271
2582	sphingosine		Sphingosines	17747	LC/MS Pos Late	297	1393	300.29	5353955	123-78-4	C00319	HMDB00252	1.16763	1.19803	1.0741	0.707	0.741	1.8693	1.7234	0.8246	0.7115	0.5915	0.3504	0.1129	0.6508	0.7656	0.637101	0.419356	0.439524	1.10877	1.02223	0.489111	0.59389	0.493726	0.292479	0.0942378	0.543224	0.639047		1.54938	0.0277993	0.169564
2637	4-cholesten-3-one		Sterol	38125	LC/MS Pos Late	100002227	2520	385.346	91477	601-57-0	C00599	HMDB00921	1.58482	1.05812	1.9355	1.772	0.5789	2.0015	0.3502	0.7531	1.2472	0.9943	0.4524	1.2679	0.6259	1.1552	0.551194	0.504632	0.16486	0.56999	0.0997304	0.214469	1.1787	0.939688	0.427552	1.19826	0.591523	1.09175		0.387819	0.599943	0.455632
2624	7-HOCA		Sterol	36776	LC/MS Neg	100001609	5288.1	429.301	3081085	115538-85-7	C17337	HMDB12458	0.613133	1.17862	0.1132	1.8942	1.2169	0.892	0.1132	1.2424	1.1772	1.831	1	0.4071	0.3876	1.183	0.0689214	1.15328	0.740905	0.543091	0.0689214	0.756431	0.998798	1.55352	0.848452	0.345405	0.32886	1.00372		0.655978	0.244941	0.278447
2657	7-hydroxycholesterol (alpha or beta)		Sterol	47890	LC/MS Pos Late	100005999	1930	367.336	107722			HMDB06119	11.9889	0.52335	3.1753	0.695	0.3499	1.7223	0.4627	1.7762	0.3409	0.3409	0.3409	0.403	0.7985	0.3409	2.43477	0.532914	0.268297	1.32063	0.35479	1.36196	0.651381	0.651381	0.651381	0.770039	1.52575	0.651381		1.27994	0.00365572	0.0821022
2640	campesterol		Sterol	33997	LC/MS Pos Late	100001269	2873	383.367	173183	474-62-4	C01789	HMDB02869	0.6629	0.968883	0.6265	0.3479	0.3479	0.6677	0.3479	3.3046	0.486	0.8224	1	0.3479	1.1195	0.6467	0.415492	0.230726	0.230726	0.442816	0.230726	2.1916	0.501608	0.848812	1.03212	0.359073	1.15545	0.667469		0.819817	0.406483	0.361076
2613	cholesterol		Sterol	63	LC/MS Pos Late	266	2707	369.352	11025495	57-88-5	C00187	HMDB00067	1.17703	0.826083	1.4973	1.1146	0.9129	1.0147	1.1755	0.6327	0.569	0.666	0.8958	0.1864	0.7045	0.6667	0.928213	0.690968	0.565929	0.629037	0.728721	0.392226	0.688792	0.806214	1.08439	0.225643	0.85282	0.807061		0.881335	0.337645	0.330397
2612	desmosterol		Sterol	6065	LC/MS Pos Late	306	2364	367.336	439577	313-04-2	C01802	HMDB02719	1.25655	0.9309	4.6514	1.0527	0.3819	1.5686	0.4918	0.2301	0.2901	0.5091	0.8782	0.2301	0.2301	0.2301	2.87766	0.651269	0.236268	0.970438	0.30426	0.142355	0.311634	0.54689	0.943388	0.24718	0.24718	0.24718		2.03749	0.2661	0.290113
6515	LPC(16:0)	Lysolipid	LPC Ester	53287	DMS-MS	100009435							0.874033	1.46762	1.0388	1.5633	1.2534	0.8043	1.3097	1.0241	0.7484	1.1548	0.3954	1.028	0.8597	0.5251	#REF!	#REF!	#REF!	#REF!	#REF!	#REF!	0.509942	0.786854	0.269416	0.700455	0.58578	0.357791		#REF!	0.000513413	0.0590938
6516	LPC(16:1)		LPC Ester	53479	DMS-MS	100009627							0.692883	0.865467	1.0004	0.6396	0.6396	0.6396	0.6396	0.6396	0.7	0.6396	0.6396	0.8364	0.8102	0.6396	#REF!	#REF!	#REF!	#REF!	#REF!	#REF!	0.808812	0.739023	0.739023	0.966415	0.936142	0.739023		#REF!	0.0907238	0.182398
6517	LPC(17:0)		LPC Ester	54143	DMS-MS	100010291							0.965933	1.19992	0.8717	1.5714	0.5774	0.9128	1.3113	0.8115	0.7772	1.0989	0.5774	0.7609	0.6299	0.5774	#REF!	#REF!	#REF!	#REF!	#REF!	#REF!	0.647712	0.915814	0.4812	0.634127	0.524953	0.4812		#REF!	0.0378243	0.17396
6518	LPC(18:0)		LPC Ester	54144	DMS-MS	100010292							1.10262	1.29222	1.164	1.6446	1.6739	0.7858	1.4504	1.1314	0.5625	0.9191	0.4124	0.9164	0.8648	0.453	#REF!	#REF!	#REF!	#REF!	#REF!	#REF!	0.435299	0.711258	0.319142	0.709169	0.669238	0.35056		#REF!	0.00215172	0.0727612
6519	LPC(18:1)		LPC Ester	54145	DMS-MS	100010293							0.797467	1.15708	1.0758	1.1792	1.2585	0.6113	1.2077	0.6011	1.1303	0.642	0.626	0.9878	1.1585	0.4419	#REF!	#REF!	#REF!	#REF!	#REF!	#REF!	0.976853	0.554843	0.541015	0.853698	1.00122	0.381909		#REF!	0.0216946	0.159811
6520	LPC(18:2)		LPC Ester	54331	DMS-MS	100010479							0.895833	1.52555	1.1205	0.8729	1.182	0.618	1.0721	0.8272	1.0702	0.952	1.1837	0.9709	0.7965	0.6758	#REF!	#REF!	#REF!	#REF!	#REF!	#REF!	0.701517	0.624037	0.775917	0.636426	0.522107	0.442988		#REF!	0.00437612	0.0915803
6523	LPC(20:0)		LPC Ester	53480	DMS-MS	100009628							1.06615	1.1281	1.018	0.8828	1.364	0.8859	0.8704	1.0013	0.9619	1.2396	0.8413	0.9608	0.9973	0.7623	#REF!	#REF!	#REF!	#REF!	#REF!	#REF!	0.852673	1.09884	0.745767	0.851698	0.884053	0.675738		#REF!	0.356811	0.33811
6524	LPC(20:1)		LPC Ester	53813	DMS-MS	100009961							0.8526	0.9767	0.5689	1.3828	1.958	0.3688	0.6535	0.3688	0.6984	0.5588	0.3688	0.7989	1.7766	0.3688	#REF!	#REF!	#REF!	#REF!	#REF!	#REF!	0.715061	0.572131	0.377598	0.817958	1.81898	0.377598		#REF!	0.516371	0.416352
6525	LPC(20:2)		LPC Ester	53990	DMS-MS	100010138							0.796033	0.821117	0.9783	1.18	2.312	0.7224	0.896	0.4468	0.6591	0.4468	0.4468	0.6115	0.9387	0.4468	#REF!	#REF!	#REF!	#REF!	#REF!	#REF!	0.802687	0.544137	0.544137	0.744718	1.1432	0.544137		#REF!	0.111775	0.197928
6526	LPC(20:3)		LPC Ester	54146	DMS-MS	100010294							0.644867	1.16925	0.7471	0.7408	1.0479	0.577	0.577	0.577	0.577	0.577	0.577	1.0444	0.9069	0.577	#REF!	#REF!	#REF!	#REF!	#REF!	#REF!	0.493479	0.493479	0.493479	0.893222	0.775625	0.493479		#REF!	0.00643177	0.102833
6527	LPC(20:4)		LPC Ester	53481	DMS-MS	100009629							0.840117	2.47455	1.4951	1.567	1.9163	0.8564	1.4652	0.7377	0.6374	0.8578	0.3075	0.7659	0.9474	0.3075	#REF!	#REF!	#REF!	#REF!	#REF!	#REF!	0.257582	0.346649	0.124265	0.309511	0.382857	0.124265		#REF!	0.00142386	0.0727612
6529	LPC(22:0)		LPC Ester	53814	DMS-MS	100009962							0.8705	0.8705	0.8705	0.8705	0.8705	0.8705	0.8705	0.8705	0.8705	0.8705	0.8705	0.8705	0.8705	0.8705	#REF!	#REF!	#REF!	#REF!	#REF!	#REF!	1	1	1	1	1	1		#REF!	NA	NA
6530	LPC(22:1)		LPC Ester	54332	DMS-MS	100010480							0.752	0.8242	0.752	0.752	0.752	0.752	0.752	0.752	0.752	0.752	0.752	0.752	0.752	0.752	#REF!	#REF!	#REF!	#REF!	#REF!	#REF!	0.9124	0.9124	0.9124	0.9124	0.9124	0.9124		#REF!	NA	NA
6532	LPC(22:4)		LPC Ester	53815	DMS-MS	100009963							0.773917	0.947133	1.4858	1.0112	1.9022	0.6164	1.6384	0.6164	0.6164	0.6164	0.6164	0.6164	0.8678	0.6164	#REF!	#REF!	#REF!	#REF!	#REF!	#REF!	0.650806	0.650806	0.650806	0.650806	0.916238	0.650806		#REF!	0.0285587	0.169564
6533	LPC(22:5)		LPC Ester	54333	DMS-MS	100010481							0.8618	0.865667	0.8618	0.8618	0.8618	0.8618	0.8618	0.8618	0.8618	0.8618	0.8618	0.8618	0.8618	0.8618	#REF!	#REF!	#REF!	#REF!	#REF!	#REF!	0.995533	0.995533	0.995533	0.995533	0.995533	0.995533		#REF!	NA	NA
6534	LPC(22:6)		LPC Ester	53645	DMS-MS	100009793							0.7064	1.09837	1.1321	0.9765	0.6488	0.6488	0.6488	0.6488	0.6488	0.6488	0.6488	0.6488	0.7132	0.6488	#REF!	#REF!	#REF!	#REF!	#REF!	#REF!	0.590695	0.590695	0.590695	0.590695	0.649328	0.590695		#REF!	0.00925614	0.115302
6771	LPE(15:0)		LPE Ester	53646	DMS-MS	100009794							1	1	1	1	1	1	1	1	1	1	1	1	1	1	#REF!	#REF!	#REF!	#REF!	#REF!	#REF!	1	1	1	1	1	1		#REF!	NA	NA
6772	LPE(16:0)		LPE Ester	54516	DMS-MS	100010664							0.86315	1.23188	1.4118	1.4116	1.0004	0.9828	1.4264	1.1104	0.9134	0.9911	0.448	1.1335	0.9996	0.3252	#REF!	#REF!	#REF!	#REF!	#REF!	#REF!	0.741466	0.80454	0.363671	0.920136	0.81144	0.263986		#REF!	0.000461102	0.0590938
6773	LPE(16:1)		LPE Ester	54147	DMS-MS	100010295							0.747633	1.05707	0.9686	1.1923	0.6712	0.7255	0.8212	1.0376	1.6658	1.126	1.0989	1.0054	0.8922	0.6712	#REF!	#REF!	#REF!	#REF!	#REF!	#REF!	1.57587	1.06521	1.03957	0.951123	0.844034	0.634965		#REF!	0.288381	0.302094
6774	LPE(17:0)		LPE Ester	53993	DMS-MS	100010141							0.766267	0.889867	1.3054	1.1975	1.0774	0.8359	1.2497	0.8744	0.624	0.738	0.5415	0.5415	0.6615	0.5415	0.892073	0.818337	0.736264	0.57123	0.854009	0.59754	0.701229	0.829338	0.608518	0.608518	0.74337	0.608518		1.09025	0.00048192	0.0590938
6775	LPE(18:0)		LPE Ester	53484	DMS-MS	100009632							0.933767	1.09732	1.9109	1.3984	1.3264	0.9676	1.8239	1.0043	0.6811	0.8328	0.476	0.8339	0.9957	0.242	1.39788	1.02297	0.9703	0.707827	1.33424	0.734674	0.620696	0.758942	0.433785	0.759945	0.907395	0.220538		1.66641	0.00220882	0.0727612
6776	LPE(18:1)		LPE Ester	53288	DMS-MS	100009436							1.02737	1.00915	1.0454	1.2651	0.9878	0.7451	0.9956	0.5604	1.3525	1.1078	0.7847	1.0884	1.0044	0.4815	0.967963	1.17139	0.91463	0.689907	0.921852	0.518889	1.34024	1.09776	0.777585	1.07853	0.995293	0.477134		0.899089	0.743267	0.508092
6777	LPE(18:2)		LPE Ester	53817	DMS-MS	100009965							0.951283	1.24557	1.0389	0.8522	0.9135	0.7673	0.913	0.4475	1.1761	0.941	0.9619	0.7737	0.9165	0.6911	1.21107	0.993433	1.06489	0.894463	1.06431	0.521663	0.944229	0.755479	0.772259	0.621163	0.73581	0.554848		1.31161	0.230753	0.270234
6780	LPE(20:0)		LPE Ester	53289	DMS-MS	100009437							0.704367	0.852133	0.8258	0.683	0.5688	0.5688	0.5688	0.5688	0.5688	0.5688	0.5688	0.5688	0.9374	0.5688	0.733317	0.606509	0.505099	0.505099	0.505099	0.505099	0.667501	0.667501	0.667501	0.667501	1.10006	0.667501		0.757221	0.131793	0.212239
6781	LPE(20:1)		LPE Ester	53647	DMS-MS	100009795							0.977367	0.885233	0.5968	1.0927	1.5351	0.8477	0.5845	0.528	0.992	0.5572	0.3564	1.008	1.1281	0.3564	0.55555	1.01717	1.429	0.789109	0.544101	0.491506	1.12061	0.629439	0.402606	1.13868	1.27435	0.402606		0.971447	0.812068	0.535115
6782	LPE(20:2)		LPE Ester	53818	DMS-MS	100009966							0.810733	0.750283	0.6468	1.0949	1.5366	0.6584	0.6885	0.6577	0.709	0.3054	0.3054	1.2223	1.0363	0.3054	0.706293	1.19561	1.67794	0.71896	0.751829	0.718196	0.944976	0.407046	0.407046	1.62912	1.38121	0.407046		1.11444	0.45778	0.382519
6783	LPE(20:3)		LPE Ester	54334	DMS-MS	100010482							0.819183	0.922883	0.9303	1.3697	1.2627	0.6727	0.7127	0.6218	0.5942	0.4615	0.2898	1.0185	1.0817	0.2382	0.705521	1.03875	0.957607	0.510162	0.540497	0.471561	0.643852	0.500063	0.314016	1.10361	1.17209	0.258104		1.05821	0.0650241	0.175205
6784	LPE(20:4)		LPE Ester	53485	DMS-MS	100009633							0.898	1.10158	1.0972	1.9039	1.4143	0.764	1.2818	0.9241	0.6415	0.7849	0.2768	1.0042	0.8099	0.2441	0.577165	1.00152	0.74397	0.40189	0.674271	0.486108	0.582344	0.71252	0.251275	0.911597	0.735214	0.22159		1.13776	0.00557638	0.0987448
6789	LPE(22:4)		LPE Ester	53487	DMS-MS	100009635							1.02175	0.998317	2.0265	1.6964	1.9614	0.7805	2.3395	0.8625	0.6997	0.6528	0.1153	1.304	1.1712	0.1788	1.37432	1.15045	1.33017	0.529314	1.58659	0.584924	0.70088	0.653901	0.115494	1.3062	1.17317	0.179101		1.58783	0.0226536	0.165551
6790	LPE(22:5)		LPE Ester	54519	DMS-MS	100010667							1.04117	1.26617	1.0922	1.4852	1.3442	0.883	1.5167	1.0227	0.5932	0.7662	0.2859	1.2225	0.8784	0.2859	0.989028	1.3449	1.21722	0.799589	1.37343	0.926093	0.468501	0.605134	0.2258	0.965513	0.693748	0.2258		2.08833	0.00207746	0.0727612
6791	LPE(22:6)		LPE Ester	53649	DMS-MS	100009797							0.8848	1.07655	1.2139	1.7841	1.3996	0.8096	1.4295	0.6979	0.4861	0.5991	0.1855	1.0221	0.8914	0.1627	1.02119	1.50086	1.1774	0.681071	1.20256	0.587104	0.451535	0.5565	0.17231	0.949422	0.828015	0.151131		1.98468	0.00467673	0.0920434
10137	MAG(14:0)	MAG	Ester	62028	DMS-MS	100020155							0.776683	0.84425	0.7068	0.7068	0.7068	0.7068	0.7068	0.7068	0.93	0.7068	0.7068	1.5038	0.9102	0.7068	0.596959	0.596959	0.596959	0.596959	0.596959	0.596959	1.10157	0.837193	0.837193	1.78123	1.07812	0.837193		0.553382	0.309816	0.31453
10138	MAG(14:1)		Ester	62004	DMS-MS	100020131							1	1	1	1	1	1	1	1	1	1	1	1	1	1	1.04581	1.04581	1.04581	1.04581	1.04581	1.04581	1	1	1	1	1	1		1.04581	NA	NA
10139	MAG(15:0)		Ester	62005	DMS-MS	100020132							0.433033	1.41325	0.2345	0.2345	0.2345	0.2345	1.6304	0.965	1.2566	0.2345	0.6192	1.4756	0.2345	0.2345	0.167724	0.167724	0.167724	0.167724	1.16613	0.690206	0.889156	0.16593	0.438139	1.04412	0.16593	0.16593		0.880812	0.178894	0.238043
10140	MAG(16:0)		Ester	62006	DMS-MS	100020133							0.9829	1.20362	1.1227	0.9995	0.5872	1.0509	1.2496	0.737	0.946	0.6898	0.8017	1.2636	1.4213	0.5221	0.531363	0.473054	0.277916	0.497381	0.591424	0.348815	0.785965	0.573106	0.666076	1.04984	1.18086	0.433776		0.579995	0.244609	0.278412
10141	MAG(16:1)		Ester	62007	DMS-MS	100020134							0.539433	2.1391	0.2702	0.2702	0.2702	0.2702	0.2702	0.2702	0.8361	0.2702	0.2702	0.2702	0.4491	0.2702	0.118794	0.118794	0.118794	0.118794	0.118794	0.118794	0.390865	0.126315	0.126315	0.126315	0.209948	0.126315		0.644408	0.000766658	0.0727386
10142	MAG(17:0)		Ester	62008	DMS-MS	100020135							0.912167	0.8346	0.8152	0.8152	0.8152	0.8152	0.8152	0.8152	1.0791	0.8152	0.8152	0.8152	0.8152	0.8152	0.270546	0.270546	0.270546	0.270546	0.270546	0.270546	1.29295	0.976755	0.976755	0.976755	0.976755	0.976755		0.262805	0.0496679	0.17396
10143	MAG(18:0)		Ester	62009	DMS-MS	100020136							0.9094	1.08457	0.2954	1.2674	0.4518	1.3846	0.9716	0.8283	1.0919	0.8164	1.1605	1.4859	1.5217	0.6627	0.070113	0.300816	0.107234	0.328634	0.230609	0.196596	1.00676	0.752743	1.07001	1.37004	1.40305	0.611027		0.198596	0.732189	0.503823
10144	MAG(18:1)		Ester	62010	DMS-MS	100020137							1.7687	2.91083	2.0255	0.8108	0.8596	1.0168	0.9748	0.5284	0.8397	0.5767	0.1714	0.5885	0.9326	0.4144	0.597346	0.239115	0.253507	0.299867	0.287481	0.155832	0.288474	0.198122	0.0588835	0.202176	0.320389	0.142365		1.51449	0.0215532	0.159811
10145	MAG(18:2)		Ester	62011	DMS-MS	100020138							1.22588	4.21732	1.7628	1	0.9524	1.0014	0.8271	0.855	0.5434	0.4808	0.2024	0.4177	0.8687	0.2024	1.80178	1.02211	0.973459	1.02354	0.845389	0.873905	0.12885	0.114006	0.0479926	0.099044	0.205984	0.0479926		10.1576	0.000991607	0.0727612
10146	MAG(18:3)		Ester	62012	DMS-MS	100020139							0.7623	0.801917	0.7623	0.7623	0.7623	0.7623	0.7623	0.7623	0.7623	0.7623	0.7623	0.7623	0.7623	0.7623	0.49431	0.49431	0.49431	0.49431	0.49431	0.49431	0.950598	0.950598	0.950598	0.950598	0.950598	0.950598		0.519999	NA	NA
10148	MAG(20:0)		Ester	62014	DMS-MS	100020141							0.9113	0.9113	0.9113	0.9113	0.9113	0.9113	0.9113	0.9113	0.9113	0.9113	0.9113	0.9113	1.0887	0.9113	1.00865	1.00865	1.00865	1.00865	1.00865	1.00865	1	1	1	1	1.19467	1		0.976955	0.363217	0.338856
10149	MAG(20:1)		Ester	62015	DMS-MS	100020142							0.5777	0.7563	0.5188	0.5188	1.0206	0.5188	0.5188	0.5188	0.5188	0.5188	0.5188	0.5188	0.9794	0.5188	0.443267	0.443267	0.87201	0.443267	0.443267	0.443267	0.685971	0.685971	0.685971	0.685971	1.29499	0.685971		0.65364	0.182738	0.239591
10150	MAG(20:2)		Ester	62016	DMS-MS	100020143							0.6706	0.704567	0.6706	0.6706	0.6706	0.6706	0.6706	0.6706	0.6706	0.6706	0.6706	0.6706	0.6913	0.6706	0.424327	0.424327	0.424327	0.424327	0.424327	0.424327	0.951791	0.951791	0.951791	0.951791	0.98117	0.951791		0.443538	0.000306908	0.0590938
10151	MAG(20:3)		Ester	62017	DMS-MS	100020144							0.5927	0.874417	0.5927	0.5927	0.5927	0.5927	0.5927	0.5927	0.5927	0.5927	0.5927	0.5927	0.6107	0.5927	0.375709	0.375709	0.375709	0.375709	0.375709	0.375709	0.677823	0.677823	0.677823	0.677823	0.698408	0.677823		0.551496	2.73878e-09	2.52e-06
10152	MAG(20:4)		Ester	62018	DMS-MS	100020145							0.731517	2.57523	0.962	1.0978	1.0134	0.3421	0.7671	0.3421	0.3421	1	0.3421	0.9078	0.635	0.3421	1.13972	1.30061	1.20062	0.4053	0.908814	0.4053	0.132842	0.388314	0.132842	0.352512	0.24658	0.132842		3.86769	0.0070859	0.103567
10155	MAG(22:1)		Ester	62021	DMS-MS	100020148							1	1	1	1	1	1	1	1	1	1	1	1	1	1	0.42697	0.42697	0.42697	0.42697	0.42697	0.42697	1	1	1	1	1	1		0.42697	NA	NA
10157	MAG(22:4)		Ester	62023	DMS-MS	100020150							0.724633	1.36395	1.3697	0.5866	1.0886	0.5866	1.045	0.5866	0.5866	0.5866	0.5866	0.5866	0.97	0.5866	0.948228	0.406097	0.753626	0.406097	0.723442	0.406097	0.430074	0.430074	0.430074	0.430074	0.71117	0.430074		1.27329	0.0107937	0.119665
10158	MAG(22:5)		Ester	62024	DMS-MS	100020151							0.5068	0.654417	0.5068	0.5068	0.5068	0.5068	0.5068	0.5068	0.5068	0.5068	0.5068	0.5068	0.5068	0.5068	0.442891	0.442891	0.442891	0.442891	0.442891	0.442891	0.77443	0.77443	0.77443	0.77443	0.77443	0.77443		0.571893	NA	NA
10159	MAG(22:6)		Ester	62025	DMS-MS	100020152							0.8001	0.988683	0.8001	0.8001	0.8001	0.8001	0.8001	0.8001	0.8001	0.8001	0.8001	0.8001	0.8001	0.8001	1.05085	1.05085	1.05085	1.05085	1.05085	1.05085	0.809258	0.809258	0.809258	0.809258	0.809258	0.809258		1.29854	NA	NA
6285	Total CE	Neutral Complex Lipids SUM	Cholesteryl Esters	54657	DMS-MS	100010820							1.78113	1.24887	1.6424	0.701	0.8158	0.8141	1.2102	1.3612	1.069	1.3198	1.8041	0.6829	0.6577	1.4997	0.490083	0.209175	0.24343	0.242923	0.361117	0.406175	0.855976	1.0568	1.44459	0.546816	0.526637	1.20085		0.346772	0.0947472	0.185761
6286	Total DAG	Neutral Complex Lipids SUM	Diacylglycerols	54659	DMS-MS	100010822							2.90548	1.15285	3.1252	0.7148	0.4351	2.0935	0.3365	0.892	2.204	1.8665	3.1637	0.8758	0.2052	2.9196	1.89425	0.433256	0.263724	1.26892	0.20396	0.540661	1.91178	1.61903	2.74424	0.759683	0.177994	2.53251		0.472515	0.0323801	0.171135
6284	Total FFA	Neutral Complex Lipids SUM	Free Fatty Acids	54660	DMS-MS	100010823							1.38313	1.1364	1.7116	0.8593	0.734	1.1197	0.7712	1.1822	1.3767	1.0056	1.4383	0.6575	0.6313	0.6606	1.97265	0.990357	0.845947	1.29047	0.888821	1.3625	1.21146	0.8849	1.26566	0.578581	0.555526	0.581309		1.44773	0.661774	0.483104
6289	Total MAG	Neutral Complex Lipids SUM	Monoacylglycerols	62056	DMS-MS	100020183							1.02732	1.8169	0.9277	0.9253	0.6062	0.9756	0.9834	0.6513	0.8889	0.6134	0.628	1.0517	1.2045	0.4175	0.777229	0.775218	0.507875	0.817359	0.823894	0.54566	0.48924	0.337608	0.345644	0.578843	0.662942	0.229787		1.60633	0.00246478	0.0756524
6288	Total TAG	Neutral Complex Lipids SUM	Triacylglycerols	54658	DMS-MS	100010821							1.7212	1.4683	0.8769	1.0809	0.3249	2.5946	0.0721	2.0067	2.8283	2.9227	4.3764	1.2354	0.0865	4.6482	0.963009	1.18704	0.356804	2.84938	0.07918	2.20375	1.92624	1.99053	2.98059	0.841381	0.0589117	3.1657		0.696791	0.0708214	0.175205
3595	(3'-5')-adenylyladenosine*	Nucleotide	Dinucleotide	62396	LC/MS Neg	100020723	2173	595.142	94231				1.02565	1.8484	0.0529	0.8745	1.9372	0.975	0.0882	0.5208	0.7869	2.188	1.4952	0.0977	0.3125	1.5294	0.0566826	0.937031	2.07572	1.04472	0.0945068	0.55804	0.42572	1.18373	0.808916	0.0528565	0.169065	0.827418		1.3746	0.672035	0.485875
3592	(3'-5')-adenylylcytidine	Nucleotide	Dinucleotide	52753	LC/MS Neg	100009062	1920	571.131	10875494	4833-63-0			0.96095	1.38663	0.0943	0.331	2.4536	0.5396	0.0943	0.2585	0.4832	0.9392	1.2494	0.0943	0.3666	1.2631	0.0943	0.331	2.4536	0.5396	0.0943	0.2585	0.34847	0.677324	0.901031	0.0680064	0.264381	0.910911		1.18964	0.770115	0.519503
3593	(3'-5')-adenylylguanosine*	Nucleotide	Dinucleotide	62760	LC/MS Neg	100020724	1980	611.137	444337				0.921433	1.66172	0.1661	0.7317	1.9727	0.8028	0.1661	0.5634	0.5823	2.0744	1.1028	0.1661	0.2928	1.5325	0.202134	0.890435	2.40066	0.976959	0.202134	0.685624	0.350421	1.24835	0.663651	0.0999569	0.176203	0.922239		1.54817	0.544383	0.429904
3594	(3'-5')-adenylyluridine	Nucleotide	Dinucleotide	52740	LC/MS Neg	100009060	2002	572.115	112074	3051-84-1			1.11068	1.66012	0.042	0.8078	1.8454	0.8751	0.0626	0.3367	0.4657	1.5157	1.023	0.0424	0.2728	1.4228	0.0411415	0.791288	1.80768	0.857213	0.0613204	0.329818	0.280522	0.913008	0.616222	0.0255404	0.164326	0.857048		1.36119	0.693427	0.492675
3599	(3'-5')-cytidylyluridine*	Nucleotide	Dinucleotide	62399	LC/MS Neg	100020728	1522	548.104					1.04742	2.38653	0.1534	1.3037	0.1534	1.5919	0.1534	0.6917	0.1534	0.3052	0.1534	0.1534	0.1534	0.4293	0.117093	0.99514	0.117093	1.21513	0.117093	0.527988	0.0642773	0.127884	0.0642773	0.0642773	0.0642773	0.179884		5.46939	0.0789054	0.178685
3601	(3'-5')-guanylylcytidine	Nucleotide	Dinucleotide	52746	LC/MS Neg	100009064	1670	587.126	107595	4785-04-0			1.07307	1.33342	0.054	0.3081	2.6373	0.5564	0.054	0.2948	0.4816	1.0245	1.2815	0.054	0.1166	1.6945	0.0415358	0.236985	2.02856	0.427973	0.0415358	0.226755	0.361177	0.768327	0.961065	0.0404975	0.0874445	1.2708		0.860729	0.955124	0.581619
3602	(3'-5')-guanylyluridine	Nucleotide	Dinucleotide	52743	LC/MS Neg	100009056	1772	588.11		4785-07-03			1.02877	1.64502	0.0729	0.5959	1.7678	0.6496	0.0729	0.3477	0.4241	1.0326	1.2674	0.0729	0.1735	1.7145	0.0774036	0.632713	1.87701	0.689731	0.0774036	0.36918	0.257809	0.627714	0.770448	0.0443157	0.10547	1.04224		1.30739	0.761796	0.515023
3603	(3'-5')-uridylylcytidine*	Nucleotide	Dinucleotide	62398	LC/MS Neg	100020729	1591	548.104					0.95595	1.0738	0.1234	0.2217	3.2006	0.2428	0.1234	0.1859	0.5886	1	1.5525	0.1234	0.1865	2.0059	0.132776	0.238545	3.44379	0.261248	0.132776	0.200025	0.548147	0.931272	1.4458	0.114919	0.173682	1.86804		0.867627	0.831067	0.540103
3605	(3'-5')-uridylyluridine	Nucleotide	Dinucleotide	52741	LC/MS Neg	100009058	1688	549.088	102258	2415-43-2			1.40222	1.93693	0.0445	0.5775	3.5425	0.5767	0.0445	0.2549	0.5498	1.9396	1.4643	0.0445	0.1615	2.2259	0.0474304	0.615529	3.77578	0.614677	0.0474304	0.271686	0.283851	1.00138	0.755989	0.0229745	0.0833792	1.14919		1.62964	0.912885	0.571513
3590	methylphosphate	Nucleotide	Purine and Pyrimidine Metabolism	37070	LC/MS Neg	100001805	605	110.985	13130	7023-27-0		HMDB61711	1.00495	1.2939	0.327	0.7081	1.1468	0.8103	0.5578	0.6234	0.8843	0.5883	1.3986	0.3396	0.7092	0.9996	0.212568	0.460303	0.745482	0.526739	0.3626	0.405244	0.683438	0.454672	1.08092	0.262462	0.54811	0.772548		0.713527	0.72322	0.501084
3449	2'-deoxyinosine	Nucleotide	Purine Metabolism, (Hypo)Xanthine/Inosine containing	15076	LC/MS Neg	100000135	1688	251.079	65058	890-38-0	C05512	HMDB00071	1.16822	1.25437	1.4654	0.3612	0.6911	1.1013	4.0848	0.8362	0.523	0.5995	0.7008	0.0814	0.4805	0.8959	1.74577	0.430307	0.823326	1.31201	4.86633	0.996188	0.416943	0.47793	0.558688	0.0648933	0.383062	0.714225		3.8895	0.161771	0.22952
3437	AICA ribonucleotide	Nucleotide	Purine Metabolism, (Hypo)Xanthine/Inosine containing	38325	LC/MS Pos Early	216	797	339.07	65110	3031-94-5	C04677	HMDB01517	1.0201	1.19305	0.9863	1.079	3.0685	1.48	0.96	0.3567	0.5744	2.4077	1.4679	0.462	0.7866	0.8573	0.630042	0.689259	1.96014	0.945415	0.613242	0.227858	0.481455	2.0181	1.23038	0.387243	0.659319	0.718578		0.921908	0.419294	0.365612
3453	allantoin	Nucleotide	Purine Metabolism, (Hypo)Xanthine/Inosine containing	1107	LC/MS Polar	1002	1672	157.037	204	97-59-6	C02350	HMDB00462	1.4972	0.867517	0.3883	0.6604	0.5959	0.7883	0.6486	0.7556	0.535	0.4279	0.7077	0.1214	0.7156	1.1623	0.258528	0.43969	0.396746	0.524845	0.431834	0.503074	0.616703	0.493247	0.815777	0.13994	0.824883	1.3398		0.603902	0.15304	0.224172
3442	hypoxanthine	Nucleotide	Purine Metabolism, (Hypo)Xanthine/Inosine containing	3127	LC/MS Neg	171	1291.2	135.031	790	68-94-0	C00262	HMDB00157	0.94675	0.993767	1.1177	1.0311	1.2962	1.1569	2.1132	0.771	0.8395	1.422	0.8159	0.2144	0.6219	0.7989	0.485018	0.447439	0.562477	0.502029	0.917008	0.33457	0.844766	1.43092	0.821018	0.215745	0.625801	0.803911		0.685034	0.0662127	0.175205
3441	inosine	Nucleotide	Purine Metabolism, (Hypo)Xanthine/Inosine containing	1123	LC/MS Neg	361	1602.1	267.073	6021	58-63-9	C00294	HMDB00195	0.981633	0.84455	0.8184	0.8994	1.5136	0.8921	1.9216	0.4628	0.6421	1.4473	1.0892	0.2518	0.5409	1.1279	0.410579	0.451215	0.75935	0.447553	0.964038	0.23218	0.760287	1.71369	1.28968	0.298147	0.640459	1.3355		0.540748	0.755589	0.512709
3440	inosine 5'-monophosphate (IMP)	Nucleotide	Purine Metabolism, (Hypo)Xanthine/Inosine containing	2133	LC/MS Polar	362	4267.7	347.04	8582	4691-65-0	C00130	HMDB00175	4.17678	0.894833	1.4155	0.4161	0.5014	0.8349	0.5474	0.3104	0.4491	8.2563	1.8921	1.1863	1.1601	1.6462	0.707237	0.207899	0.250518	0.417148	0.273502	0.155088	0.501881	9.22663	2.11447	1.32572	1.29644	1.83967		0.123362	0.110768	0.197127
3448	N1-methylinosine	Nucleotide	Purine Metabolism, (Hypo)Xanthine/Inosine containing	48351	LC/MS Pos Early	100001409	1430	283.104	65095	20245-33-4		HMDB02721	1.5779	1.0238	0.5439	1.089	0.8731	1.6334	0.7938	1.1485	0.6428	0.3389	0.6973	0.1322	0.4215	1.2824	0.435881	0.872724	0.699702	1.30901	0.636151	0.920408	0.627857	0.331022	0.68109	0.129127	0.411702	1.25259		1.41955	0.715581	0.498794
3451	urate	Nucleotide	Purine Metabolism, (Hypo)Xanthine/Inosine containing	1604	LC/MS Neg	1134	757.1	167.021	1175	69-93-2;120K5305	C00366	HMDB00289	1.14043	1.6787	0.8643	1.8475	1.6552	1.9245	0.934	0.9232	0.8264	0.8273	0.9152	0.4942	0.5238	1.1428	0.35678	0.762642	0.683261	0.794427	0.385552	0.381094	0.492286	0.492822	0.545184	0.294394	0.312027	0.680765		1.19389	0.00864892	0.115302
3452	uric acid ribonucleoside*	Nucleotide	Purine Metabolism, (Hypo)Xanthine/Inosine containing	62102	LC/MS Neg	100002682	1200	299.063	164933	2124-54-1			1.6612	1.33477	1.3552	1.5498	1.229	2.2381	2.5209	0.8988	0.4574	0.672	0.1111	0.1311	0.2382	0.8187	2.44444	2.79545	2.21681	4.03698	4.54708	1.62121	0.342682	0.503459	0.0832355	0.0982194	0.178458	0.613366		9.70748	0.00496229	0.0920606
3443	xanthine	Nucleotide	Purine Metabolism, (Hypo)Xanthine/Inosine containing	3147	LC/MS Neg	1004	910	151.026	1188	69-89-6	C00385	HMDB00292	0.9394	1.09897	0.9776	0.9118	1.2203	1.2048	1.7825	0.8338	0.8111	0.969	0.7553	0.3317	0.5547	0.8744	4.09409	3.81852	5.11049	5.04558	7.46493	3.49187	0.738057	0.881737	0.687282	0.301829	0.504747	0.795657		7.42471	0.0102244	0.119665
3445	xanthosine	Nucleotide	Purine Metabolism, (Hypo)Xanthine/Inosine containing	15136	LC/MS Pos Early	100000299	1275	285.083	64959	146-80-5	C01762	HMDB00299	0.897483	1.46743	1.0828	1.1213	1.9826	1.5348	1.0947	0.8927	0.6629	0.6637	0.8218	0.1908	0.75	0.8562	2.51609	2.60555	4.60695	3.5664	2.54374	2.07436	0.451741	0.452286	0.560025	0.130023	0.511096	0.583468		6.66251	0.00199135	0.0727612
3444	xanthosine 5'-monophosphate (xmp)	Nucleotide	Purine Metabolism, (Hypo)Xanthine/Inosine containing	12024	LC/MS Neg	1251	580	363.035	73323	25899-70-1	C00655	HMDB01554	0.6988	0.62015	0.834	0.5851	1.1126	0.8519	0.7191	0.6198	1.2052	1.145	1.1387	0.3258	1.1283	1.8233	0.424233	0.297624	0.565949	0.433338	0.365787	0.315275	1.9434	1.84633	1.83617	0.525357	1.8194	2.9401		0.220169	0.0809298	0.180436
3487	2'-deoxyadenosine	Nucleotide	Purine Metabolism, Adenine containing	1553	LC/MS Pos Early	211	2252	252.109	13730	16373-93-6	C00559	HMDB00101	1.54237	1.2707	0.6319	0.1396	0.1764	0.5601	1.4219	1.4804	0.5387	0.2973	2.0002	0.1396	0.9938	0.7278	0.600532	0.13267	0.167643	0.532296	1.35132	1.40691	0.42394	0.233966	1.57409	0.109861	0.782089	0.572755		1.13381	0.611803	0.459876
3485	2'-deoxyadenosine 5'-monophosphate	Nucleotide	Purine Metabolism, Adenine containing	46333	LC/MS Neg	100000485	1315	330.061	12599	653-63-4	C00360	HMDB00905	1.53217	0.7009	3.7601	0.2911	0.2911	1.0677	3.1604	0.7761	0.8022	0.3054	1.7264	0.2911	0.5312	0.6693	4.40215	0.340807	0.340807	1.25001	3.70005	0.908623	1.14453	0.435725	2.46312	0.415323	0.757883	0.954915		1.77306	0.981855	0.588219
3467	adenine	Nucleotide	Purine Metabolism, Adenine containing	554	LC/MS Pos Early	880	2221	136.062	190	73-24-5	C00147	HMDB00034	1.05753	0.5293	1.9598	1.9937	1.3023	1.1526	1.305	0.5536	0.732	0.522	1.3946	0.4824	1.1136	0.8168	1.65159	1.68016	1.09749	0.971333	1.09977	0.466537	1.38296	0.986208	2.6348	0.911392	2.10391	1.54317		0.728566	0.417646	0.365212
3466	adenosine	Nucleotide	Purine Metabolism, Adenine containing	555	LC/MS Pos Early	798	2169	268.104	60961	58-61-7	C00212	HMDB00050	1.00945	0.538583	1.2707	0.804	0.8499	0.6609	1.857	0.8668	0.8989	0.3918	3.6289	0.6114	1.4655	1.136	0.84703	0.535934	0.566531	0.440546	1.23785	0.577796	1.66901	0.727464	6.73786	1.1352	2.72103	2.10924		0.278526	0.161454	0.229424
3461	2'-AMP	Nucleotide	Purine Metabolism, Adenine containing	36815	LC/MS Neg	100001694	1497.7	346.056	94136	130-49-4	C00946	HMDB11617	1.3064	0.876733	1.2482	1.3638	1.1646	1.3363	1.2621	0.7538	0.5085	1.3836	0.2885	0.1716	0.0973	0.5881	0.847559	0.926054	0.790792	0.907381	0.856997	0.511849	0.579994	1.57813	0.329062	0.195727	0.11098	0.670785		1.39714	0.198261	0.250767
3462	adenosine 3',5'-cyclic monophosphate (cAMP)	Nucleotide	Purine Metabolism, Adenine containing	2831	LC/MS Neg	207	1952.2	328.045	6076	60-92-4	C00575	HMDB00058	0.80615	0.69065	0.9457	1.025	0.3535	1.3945	0.3535	0.3535	0.3535	1.0008	0.3535	0.3535	0.8363	0.3535	0.738453	0.800375	0.276032	1.0889	0.276032	0.276032	0.511837	1.44907	0.511837	0.511837	1.21089	0.511837		0.734141	0.659057	0.482425
3464	adenosine 3',5'-diphosphate	Nucleotide	Purine Metabolism, Adenine containing	15691	LC/MS Neg	1214	575	426.022	159296	75431-54-8	C00054	HMDB00061	1.13527	0.855233	1.4874	0.9968	0.9907	1.4435	0.8188	0.3898	0.214	2.1068	0.214	0.3403	0.214	0.921	0.940222	0.630102	0.626246	0.912472	0.517584	0.246402	0.250224	2.46342	0.250224	0.397903	0.250224	1.0769		0.826	0.7714	0.519989
3460	3'-AMP	Nucleotide	Purine Metabolism, Adenine containing	35142	LC/MS Neg	100001449	1245	346.056	41211	84-21-9	C01367	HMDB03540	1.71827	1.1301	0.5496	0.7356	2.1747	1.7332	0.4724	1.1051	0.3826	1.3798	0.2009	0.3288	0.1125	0.7427	0.423187	0.566405	1.6745	1.33455	0.363744	0.850917	0.338554	1.22095	0.177772	0.290948	0.0995487	0.657198		1.87194	0.434386	0.370697
3458	ADP	Nucleotide	Purine Metabolism, Adenine containing	3108	LC/MS Neg	208	680	426.022	6022	20398-34-9	C00008	HMDB01341	0.97715	0.5634	1.1292	0.789	1.3938	0.727	1.1825	0.2466	0.7855	1.0009	2.3692	0.2087	0.5732	1.1507	0.534811	0.373686	0.660131	0.344321	0.560055	0.116795	1.39421	1.77654	4.20518	0.37043	1.01739	2.04242		0.239659	0.174615	0.236102
3459	AMP	Nucleotide	Purine Metabolism, Adenine containing	32342	LC/MS Pos Early	209	1013	348.07	6083	149022-20-8	C00020	HMDB00045	0.866417	0.42075	2.3141	1.3956	0.9659	1.3111	1.2044	0.6507	1.018	0.662	2.2984	0.5886	1.3385	0.9724	2.10166	1.26748	0.877227	1.19074	1.09383	0.590963	2.41949	1.57338	5.46263	1.39893	3.18122	2.31111		0.435676	0.109957	0.197022
3463	adenosine-2',3'-cyclic monophosphate	Nucleotide	Purine Metabolism, Adenine containing	37467	LC/MS Neg	72	1793	328.045	2024	37063-35-7	C02353	HMDB11616	3.33987	1.9458	0.6601	0.6601	1.0452	0.6601	0.6601	0.6601	0.6601	0.6731	0.6601	0.6601	0.6601	0.6601	0.9648	0.9648	1.52766	0.9648	0.9648	0.9648	0.339243	0.345925	0.339243	0.339243	0.339243	0.339243		3.11029	0.00133163	0.0727612
3465	adenylosuccinate	Nucleotide	Purine Metabolism, Adenine containing	18360	LC/MS Neg	1303	560	230.53	195	19046-78-7	C03794	HMDB00536	0.74045	0.278917	4.326	1.1204	0.994	0.9485	3.9064	0.252	0.7162	0.6391	2.7007	0.4209	1.1189	1.1378	2.49875	0.647156	0.574146	0.547865	2.25638	0.145558	2.56779	2.29137	9.68282	1.50905	4.01159	4.07935		0.276276	0.376589	0.34543
3472	1-methyladenosine	Nucleotide	Purine Metabolism, Adenine containing	15650	LC/MS Pos Early	1242	2120	282.12	27476	15763-06-1	C02494	HMDB03331	0.973517	0.826733	0.7086	1.0834	1.0763	1.4123	1.3629	0.7656	0.4751	0.5471	0.7371	0.0326	0.3944	0.6806	0.48095	0.735339	0.73052	0.958575	0.925045	0.519638	0.574671	0.661761	0.891581	0.0394323	0.477058	0.82324		1.25444	0.0139952	0.134238
3482	N6-carbamoylthreonyladenosine	Nucleotide	Purine Metabolism, Adenine containing	35157	LC/MS Neg	100001415	2164	411.127	161466	24719-82-2		HMDB41623	1.09667	1.12602	0.6732	0.805	0.9225	1.3348	2.0998	0.8035	0.6334	0.5135	0.9178	0.1306	0.4702	0.7451	0.511019	0.611068	0.700261	1.01323	1.59394	0.609929	0.562514	0.456032	0.815086	0.115984	0.417578	0.661713		1.66378	0.0565705	0.17396
3473	N6-methyladenosine	Nucleotide	Purine Metabolism, Adenine containing	37114	LC/MS Pos Early	213	2264	282.12	1869	1867-73-8		HMDB04044	0.629983	1.07307	0.4011	0.2071	1.3724	0.4871	2.2463	1	0.4188	0.2071	0.2071	0.2071	0.2071	0.6598	0.254134	0.131217	0.869543	0.308623	1.42324	0.633593	0.390283	0.192998	0.192998	0.192998	0.192998	0.614873		2.03717	0.0577116	0.17396
3492	N6-succinyladenosine	Nucleotide	Purine Metabolism, Adenine containing	48130	LC/MS Neg	100001664	940	382.1	165243	4542-23-8		HMDB00912	1.02553	0.652017	0.3892	0.6884	0.9336	1.057	0.6967	0.3164	1.0547	0.4249	1.8543	0.3546	1.6829	1.0596	0.170764	0.30204	0.409623	0.463766	0.305682	0.138823	1.6176	0.65167	2.84395	0.543851	2.58107	1.62511		0.181553	0.0525054	0.17396
3517	2'-deoxyguanosine	Nucleotide	Purine Metabolism, Guanine containing	1411	LC/MS Neg	348	1751	266.089	187790	961-07-9	C00330	HMDB00085	1.25372	1.4814	1.0539	0.2737	0.2737	1.2755	2.8556	0.6075	0.5335	0.7945	0.6352	0.2737	0.8053	1.3957	0.549006	0.142578	0.142578	0.664444	1.48756	0.316464	0.360132	0.536317	0.428784	0.184758	0.543607	0.942149		1.10244	0.341219	0.331779
3503	7-methylguanine	Nucleotide	Purine Metabolism, Guanine containing	35114	LC/MS Pos Early	100001456	2175	166.072	11361	578-76-7	C02242	HMDB00897	1.627	1.07958	0.6898	0.9452	1.1372	1.2017	1.0282	0.9718	0.4654	0.6362	0.7378	0.0572	0.3695	0.757	0.481138	0.659281	0.793202	0.838191	0.717174	0.677834	0.431092	0.589301	0.683412	0.0529834	0.342262	0.701196		1.48802	0.230136	0.270234
3501	guanine	Nucleotide	Purine Metabolism, Guanine containing	32352	LC/MS Pos Early	172	2032	152.057	764	73-40-5	C00242	HMDB00132	0.666783	0.709683	1.2461	0.9989	1.0926	1.0011	1.5676	0.3395	0.7439	1.7883	1.0088	0.4095	1.6164	0.751	1.25625	1.00704	1.1015	1.00926	1.58037	0.342267	1.04821	2.51986	1.42148	0.577018	2.27764	1.05822		0.707302	0.849616	0.546317
3500	guanosine	Nucleotide	Purine Metabolism, Guanine containing	1573	LC/MS Pos Early	1099	1728	284.099	6802	118-00-3	C00387	HMDB00133	1.03037	0.632017	0.7017	0.7762	1.1554	0.7728	1.3498	0.5579	0.6475	1.3463	1.6045	0.365	0.8179	1.2194	0.91051	1.00718	1.49922	1.00277	1.75147	0.723919	1.0245	2.13017	2.5387	0.577516	1.29411	1.92938		0.726227	0.0641867	0.175205
3496	guanosine 3'-monophosphate (3'-GMP)	Nucleotide	Purine Metabolism, Guanine containing	39786	LC/MS Neg	100002704	773.9	362.051	3522	117-68-0			1.7936	1.11075	0.3756	0.6604	2.0115	1.251	0.1686	1.3427	0.2091	0.8808	0.0875	0.0875	0.0875	0.8591	0.254245	0.447027	1.36159	0.846806	0.114126	0.908878	0.188251	0.792978	0.0787756	0.0787756	0.0787756	0.773441		1.97523	0.352541	0.336779
3495	5'- GMP	Nucleotide	Purine Metabolism, Guanine containing	2849	LC/MS Pos Early	347	800	364.065	6804	5550-12-09	C00144	HMDB01397	0.852817	0.40695	2.5406	1.108	0.8905	0.9927	1.4462	0.4742	1.027	0.7127	1.7568	0.6082	1.3261	0.9957	1.67672	0.731249	0.587705	0.655154	0.954451	0.312959	2.52365	1.75132	4.31699	1.49453	3.25863	2.44674		0.311441	0.0564812	0.17396
3509	N2,N2-dimethylguanosine	Nucleotide	Purine Metabolism, Guanine containing	35137	LC/MS Pos Early	100001412	2210	312.13	92919	2140-67-2		HMDB04824	1.05695	1.11177	0.965	1.4417	1.3359	2.3244	1.547	1.4162	0.5074	0.325	0.768	0.1353	0.498	1.143	0.560357	0.837167	0.775731	1.34973	0.898313	0.82236	0.456391	0.292328	0.690792	0.121698	0.447936	1.02809		1.72646	0.00203474	0.0727612
3574	2'-deoxycytidine	Nucleotide	Pyrimidine Metabolism, Cytidine containing	15949	LC/MS Neg	100000125	1492.2	226.083	13711	951-77-9	C00881	HMDB00014	1.34457	1.151	0.3911	0.7975	0.6678	1.5535	0.387	0.2553	0.9215	0.3753	0.5478	0.0517	0.5067	0.9264	0.599433	1.22232	1.02353	2.38103	0.593149	0.391294	0.800608	0.326064	0.475934	0.0449175	0.440226	0.804865		2.1471	0.916109	0.571513
3572	dCMP	Nucleotide	Pyrimidine Metabolism, Cytidine containing	533	LC/MS Pos Early	298	975	308.064	13945	1032-65-1	C00239	HMDB01202	1.61222	1.05575	2.4912	1.7753	0.5462	1.7083	1.7001	0.9672	0.9655	0.6297	0.9052	0.102	0.7769	0.896	26.5068	18.8895	5.81167	18.1766	18.0894	10.2912	0.914516	0.596448	0.8574	0.0966138	0.735875	0.848686		24.1423	0.228691	0.270234
3575	2'-O-methylcytidine	Nucleotide	Pyrimidine Metabolism, Cytidine containing	57554	LC/MS Pos Early	100010895	2411	258.108	150971	2140-72-9			0.975183	0.541617	0.829	0.9914	1.2449	1.5233	1.8778	1.6841	0.6313	0.3186	0.758	0.1021	0.3984	1.201	0.263255	0.314827	0.395328	0.483736	0.59631	0.534799	1.16558	0.588239	1.39951	0.18851	0.735576	2.21744		0.41117	0.338502	0.330884
3566	3-methylcytidine	Nucleotide	Pyrimidine Metabolism, Cytidine containing	35132	LC/MS Pos Early	100001466	2176	258.108	159649	21028-20-6			1.33028	1.23175	0.352	1.8744	0.7969	1.8705	0.9875	0.3264	0.3384	0.2366	0.3093	0.0277	0.1803	0.4209	0.305706	1.62788	0.692094	1.6245	0.857627	0.283473	0.274731	0.192084	0.251106	0.0224883	0.146377	0.341709		4.38852	0.0433541	0.17396
3576	5-methyl-2'-deoxycytidine	Nucleotide	Pyrimidine Metabolism, Cytidine containing	38159	LC/MS Pos Early	100002300	2303	242.114	440055	838-07-3	C03592	HMDB02224	1.92593	1.60695	0.7797	0.8215	0.6915	1.7129	1.292	0.2918	0.4627	0.3808	0.2489	0.196	0.2834	1.2651	0.595342	0.627259	0.527997	1.30789	0.986511	0.222805	0.287937	0.236971	0.15489	0.12197	0.176359	0.787268		2.41748	0.225205	0.268131
3567	5-methylcytidine	Nucleotide	Pyrimidine Metabolism, Cytidine containing	22119	LC/MS Pos Early	100000763	2227	258.108	92918	2140-61-6		HMDB00982	1.20468	1.08182	0.6975	1.5212	1.8824	2.2996	0.6743	0.3284	0.8192	0.5003	0.8521	0.0859	0.7553	0.9565	0.468414	1.02158	1.26415	1.54432	0.452834	0.220541	0.757245	0.462463	0.787657	0.0794035	0.698177	0.884161		1.35505	0.199625	0.251895
3564	cytidine	Nucleotide	Pyrimidine Metabolism, Cytidine containing	514	LC/MS Pos Early	827	2124	244.093	6175	65-46-3	C00475	HMDB00089	0.934333	1.1028	0.9539	1.2045	1.3818	1.3851	0.8524	0.3207	0.7901	0.7284	0.9677	0.1571	0.7492	0.9547	0.484	0.611152	0.701113	0.702787	0.4325	0.16272	0.716449	0.660501	0.877494	0.142456	0.679362	0.865705		0.784957	0.0707948	0.175205
3563	cytidine 2',3'-cyclic monophosphate	Nucleotide	Pyrimidine Metabolism, Cytidine containing	37465	LC/MS Neg	73	937	304.034	417654	15718-51-1	C02354	HMDB11691	1.41672	1.76595	0.1577	1.3336	0.8058	0.9785	0.146	0.6712	0.7563	1.0215	1.4689	0.1785	0.2424	0.8937	0.0830933	0.702684	0.424582	0.515579	0.0769285	0.35366	0.428268	0.578442	0.83179	0.101079	0.137263	0.506073		0.834919	0.777723	0.521415
3579	cytidine 2'-monophosphate (2'-CMP)	Nucleotide	Pyrimidine Metabolism, Cytidine containing	57769	LC/MS Polar	100002303	4000	322.045		27214-06-8			1.4981	1.21697	0.181	0.6966	1.508	1.332	0.1957	0.6292	0.3563	1.0518	0.9286	0.0683	0.4506	1.4803	0.112177	0.431728	0.934605	0.825526	0.121288	0.389956	0.292777	0.86428	0.763045	0.0561231	0.370265	1.21639		0.790171	0.711152	0.496458
3561	3'-CMP	Nucleotide	Pyrimidine Metabolism, Cytidine containing	2959	LC/MS Polar	105	4000	322.045	66535	84-52-6	C05822		1.8414	1.30353	0.1919	0.3806	3.8651	0.7943	0.1983	0.521	0.7012	2.2265	2.8746	0.1919	0.5185	2.288	0.108342	0.214876	2.18213	0.44844	0.111955	0.294143	0.537923	1.70805	2.20524	0.147215	0.397765	1.75523		0.497656	0.244152	0.278373
3560	CMP	Nucleotide	Pyrimidine Metabolism, Cytidine containing	2372	LC/MS Pos Early	282	835	324.059	6131	63-37-6	C00055	HMDB00095	1.04887	0.7598	1.2695	1.1695	0.8839	0.9716	2.1854	0.4838	0.6805	0.5731	1.0558	0.2482	0.7435	0.6115	0.958777	0.883253	0.667556	0.733791	1.6505	0.365385	0.89563	0.754277	1.38958	0.326665	0.978547	0.804817		1.02131	0.371694	0.344457
3559	cytidine diphosphate	Nucleotide	Pyrimidine Metabolism, Cytidine containing	2841	LC/MS Neg	280	580	402.011	6132	34393-59-4	C00112	HMDB01546	0.6781	0.6413	0.8675	0.2392	1.7459	0.2392	4.0349	0.6066	0.8187	1.2758	2.9139	0.2392	0.5399	1.7623	6.09628	1.68096	12.2691	1.68096	28.3549	4.26283	1.27663	1.9894	4.54374	0.372992	0.841884	2.74801		4.61621	0.955656	0.581619
3565	cytosine	Nucleotide	Pyrimidine Metabolism, Cytidine containing	573	LC/MS Pos Early	881	2060	112.051	597	71-30-7	C00380	HMDB00630	1.24288	0.9888	1.1791	0.7101	0.7886	0.6627	1.0071	2.5772	1.1907	1.0305	0.7743	0.5479	0.9304	0.9964	0.598796	0.360619	0.400484	0.336547	0.511448	1.30881	1.20419	1.04217	0.78307	0.554106	0.940939	1.00769		0.635684	0.980238	0.588015
3568	N4-acetylcytidine	Nucleotide	Pyrimidine Metabolism, Cytidine containing	35130	LC/MS Pos Early	100001413	1580	286.103	107461	3768-18-1		HMDB05923	1.51983	1.5104	0.6244	1.071	0.7724	1.7431	1.0574	1.2933	0.545	0.566	0.6628	0.0461	0.2861	0.6115	0.31221	0.535518	0.386213	0.871579	0.528718	0.646672	0.360832	0.374735	0.438824	0.0305217	0.18942	0.40486		1.82355	0.00939141	0.115302
3522	orotate	Nucleotide	Pyrimidine Metabolism, Orotate containing	1505	LC/MS Polar	445	1638.1	155.01	967	50887-69-9	C00295	HMDB00226	1.1601	1.09462	0.8018	1.2211	2.7094	0.9881	1.4843	0.8379	0.6558	0.2935	1.7849	0.0982	1.5099	0.6708	0.43913	0.668772	1.48388	0.541163	0.812922	0.458901	0.599114	0.26813	1.63062	0.0897118	1.37939	0.612817		0.961788	0.295996	0.305566
3524	orotidine	Nucleotide	Pyrimidine Metabolism, Orotate containing	35172	LC/MS Polar	100001416	2250	287.052	92751	314-50-1		HMDB00788	1.17717	1.03912	0.6055	1.2153	1.4845	1.352	0.6561	0.9006	0.9256	0.634	1.8817	0.236	1.3183	0.8284	0.407031	0.816953	0.997916	0.908846	0.441046	0.605405	0.890757	0.610134	1.81086	0.227116	1.26867	0.797216		0.745295	0.838536	0.542222
3589	3-aminoisobutyrate	Nucleotide	Pyrimidine Metabolism, Thymine containing	1566	LC/MS Pos Early	1114	2190	104.071	64956	10569-72-9;214139-20-5	C05145	HMDB03911	1.49715	1.08923	0.175	0.7211	1.728	0.7617	0.175	0.5	0.8854	1.0426	1.941	0.175	0.2968	0.5431	0.12767	0.526075	1.26065	0.555695	0.12767	0.364773	0.812865	0.957187	1.78199	0.160663	0.272485	0.498608		0.660721	0.333148	0.327738
3587	5,6-dihydrothymine	Nucleotide	Pyrimidine Metabolism, Thymine containing	1418	LC/MS Neg	158	1637.8	127.051	93556	696-04-8	C00906	HMDB00079	1.56717	0.93235	0.3764	0.3764	1.6107	1.6457	1	0.4859	0.3764	0.9364	0.3764	0.3764	0.3764	0.9531	0.261247	0.261247	1.11793	1.14223	0.694067	0.337247	0.403711	1.00434	0.403711	0.403711	0.403711	1.02226		1.04738	0.913563	0.571513
3585	thymidine	Nucleotide	Pyrimidine Metabolism, Thymine containing	2183	LC/MS Neg	872	1963.7	241.083	5789	50-89-5	C00214	HMDB00273	1.09162	1.38077	1.7589	0.8499	0.9663	1.8362	3.1671	0.3784	0.7216	0.5822	0.8322	0.0665	0.5083	1.0894	2.02662	0.97926	1.11338	2.11568	3.64915	0.435995	0.522608	0.42165	0.602709	0.0481616	0.368129	0.788982		3.7497	0.0580188	0.17396
3586	thymine	Nucleotide	Pyrimidine Metabolism, Thymine containing	604	LC/MS Neg	882	1654	125.036	1135	65-71-4	C00178	HMDB00262	2.7317	1.76657	3.9125	1.2983	1.1494	1.8554	9.0067	3.7228	0.3694	0.3461	0.5215	0.1352	0.5375	0.8696	2.48521	0.824675	0.730095	1.17854	5.72102	2.36471	0.209106	0.195917	0.295205	0.0765326	0.304263	0.492254		8.45639	0.0696597	0.175205
3550	2'-deoxyuridine	Nucleotide	Pyrimidine Metabolism, Uracil containing	52602	LC/MS Neg	536	1586	227.067	13712	951-78-0	C00526	HMDB00012	1.36362	1.68548	1.7511	0.8722	1.1056	1.7291	4.4519	1.1463	0.7831	0.4949	0.7379	0.1513	0.4815	0.8346	0.899014	0.447787	0.567615	0.887719	2.2856	0.58851	0.464615	0.293625	0.437797	0.0897665	0.285675	0.49517		2.7466	0.0519303	0.17396
3538	2'-O-methyluridine	Nucleotide	Pyrimidine Metabolism, Uracil containing	57655	LC/MS Neg	100010896	1831	257.078	102212	2140-76-3			0.962267	0.9256	0.7271	0.7753	1	1.6247	2.165	1.9072	0.5743	0.319	0.9598	0.306	0.3797	0.9108	53.2024	56.7293	73.1707	118.88	158.415	139.551	0.620462	0.344641	1.03695	0.330596	0.41022	0.98401		160.979	0.0275586	0.169564
3553	3-ureidopropionate	Nucleotide	Pyrimidine Metabolism, Uracil containing	3155	LC/MS Pos Early	1053	875	133.061	111	462-88-4	C02642	HMDB00026	3.45982	1.43917	1.2087	0.4535	1.0688	0.8245	1.5041	1.5063	0.5419	0.3077	0.5862	0.1119	0.3662	0.6094	0.69826	0.261985	0.617441	0.47631	0.868911	0.870182	0.376537	0.213804	0.407319	0.0777533	0.254453	0.423439		2.16339	0.749239	0.510278
3546	5,6-dihydrouracil	Nucleotide	Pyrimidine Metabolism, Uracil containing	1559	LC/MS Neg	1125	1120	113.036	649	504-07-4	C00429	HMDB00076	1.71013	1.40585	0.2776	1.145	3.3676	2.6065	0.2776	0.4772	0.6721	1.8273	1.5975	0.2776	0.5418	1.2988	0.204536	0.843638	2.48125	1.92047	0.204536	0.351602	0.478074	1.29978	1.13632	0.197461	0.38539	0.923854		1.35856	0.878323	0.557765
3537	5,6-dihydrouridine	Nucleotide	Pyrimidine Metabolism, Uracil containing	61833	LC/MS Neg	100001425	1119	245.078	94312	5627-05-04			1.20072	1.02107	0.6279	1.0194	1.0164	1.3164	1.0413	1.2307	0.4098	0.4086	0.8511	0.0846	0.4517	0.7506	0.436345	0.708409	0.706324	0.914802	0.723628	0.855247	0.401345	0.40017	0.83354	0.0828545	0.442381	0.735114		1.50057	0.0195143	0.154903
3539	5-methyluridine (ribothymidine)	Nucleotide	Pyrimidine Metabolism, Uracil containing	35136	LC/MS Neg	100001446	1778.1	257.078	445408	1463-10-1		HMDB00884	1.74157	1.4825	2.3748	0.8689	0.7546	1.8474	5.1614	1.2429	0.4435	0.2417	0.4567	0.1003	0.7091	0.7582	2.02637	0.741414	0.643884	1.57635	4.40411	1.06054	0.299157	0.163035	0.308061	0.067656	0.478314	0.511433		5.71916	0.0745577	0.176735
3554	beta-alanine	Nucleotide	Pyrimidine Metabolism, Uracil containing	55	LC/MS Pos Early	244	1905	90.055	239	56-41-7;107-95-9	C00099	HMDB00056	1.12103	0.76645	0.8738	1.13	1.2162	1.1214	1.422	0.5504	0.8226	0.8714	1.4324	0.1993	0.7795	0.914	0.586318	0.758228	0.816068	0.752458	0.95416	0.369317	1.07326	1.13693	1.86888	0.26003	1.01703	1.19251		0.646936	0.537465	0.426324
3555	N-acetyl-beta-alanine	Nucleotide	Pyrimidine Metabolism, Uracil containing	37432	LC/MS Polar	100002102	1750	130.051	76406	3025-95-4	C01073		1.33158	0.90145	0.4105	0.9348	0.4307	1.0343	0.8767	0.6026	0.8716	0.2822	1.4861	0.086	1.3662	1.2264	0.301347	0.686234	0.316176	0.759277	0.643583	0.442367	0.966887	0.313051	1.64857	0.0954019	1.51556	1.36047		0.533732	0.159142	0.227898
3536	pseudouridine	Nucleotide	Pyrimidine Metabolism, Uracil containing	33442	LC/MS Neg	821	1100	243.062	15047	1445-07-4	C02067	HMDB00767	1.26605	1.05883	0.8323	1.0057	1.0683	1.4512	1.3538	1.4851	0.6138	0.3652	0.9436	0.1979	0.6096	0.9334	0.366835	0.443261	0.470852	0.639614	0.596686	0.654556	0.579695	0.344908	0.89117	0.186904	0.575728	0.881536		0.916722	0.0291935	0.170135
3535	uracil	Nucleotide	Pyrimidine Metabolism, Uracil containing	605	LC/MS Polar	825	1089.7	111.02	1174	66-22-8	C00106	HMDB00300	1.03337	1.08553	1.4397	1.2828	1.2037	1.4349	3.0099	1.441	0.5325	0.5568	0.6022	0.1716	0.5682	0.8324	1.61631	1.44016	1.35136	1.61092	3.37913	1.61777	0.490542	0.512928	0.55475	0.158079	0.523429	0.766812		3.66389	0.00875153	0.115302
3534	uridine	Nucleotide	Pyrimidine Metabolism, Uracil containing	606	LC/MS Neg	535	1457.6	243.062	6029	58-96-8	C00299	HMDB00296	0.783467	1.0646	0.7578	0.9548	1.0068	1.1703	1.5291	0.3505	0.7166	0.8001	0.8747	0.261	0.596	0.7808	1.81422	2.28585	2.41034	2.80177	3.66076	0.839119	0.673117	0.75155	0.821623	0.245163	0.559835	0.733421		3.64944	0.0333237	0.171422
3557	uridine 2'-monophosphate (2'-UMP)*	Nucleotide	Pyrimidine Metabolism, Uracil containing	52444	LC/MS Neg	100008975	824	323.029					1.28608	1.14038	0.0634	0.684	1.8828	1.0069	0.0845	0.576	0.0634	0.0634	0.5892	0.0634	0.0634	0.0634	0.0478985	0.516759	1.42245	0.760709	0.0638394	0.435166	0.0555953	0.0555953	0.516668	0.0555953	0.0555953	0.0555953		4.08588	0.110194	0.197022
3531	uridine 3'-monophosphate (3'-UMP)	Nucleotide	Pyrimidine Metabolism, Uracil containing	39764	LC/MS Neg	106	750	323.029	101543	35170-0-7;35170-03-7	C01368		2.1274	1.17127	0.2008	0.2402	4.2727	0.5909	0.2008	0.6176	0.2008	0.2008	1.3144	0.2008	0.2008	0.2008	0.176287	0.210877	3.75111	0.518766	0.176287	0.542206	0.171438	0.171438	1.1222	0.171438	0.171438	0.171438		2.71574	0.677573	0.487049
3528	uridine 5'-diphosphate (UDP)	Nucleotide	Pyrimidine Metabolism, Uracil containing	5345	LC/MS Neg	870	599.5	402.995	6031	21931-53-3	C00015	HMDB00295	0.877367	0.497767	1.8876	0.9414	1	0.6799	2.9713	0.4975	1.0502	0.6675	2.3982	0.1742	0.6277	1.401	2.86499	1.42885	1.5178	1.03195	4.50983	0.755104	2.10982	1.34099	4.81792	0.349963	1.26103	2.81457		0.953855	0.457793	0.382519
3529	UMP	Nucleotide	Pyrimidine Metabolism, Uracil containing	2856	LC/MS Polar	869	4150	323.029	6030	3387-36-8	C00105	HMDB00288	0.880517	0.396483	2.1567	1.1351	0.5863	0.772	1.8318	0.3426	0.8404	0.704	2.3866	0.5082	1.3346	0.7706	8.7069	4.58256	2.36698	3.11667	7.39524	1.38312	2.11964	1.77561	6.01942	1.28177	3.36609	1.94359		1.66917	0.105405	0.19334
3527	uridine 5'-triphosphate (UTP)	Nucleotide	Pyrimidine Metabolism, Uracil containing	33448	LC/MS Neg	871	572	482.961	6133	19817-92-6	C00075	HMDB00285	1.5213	1.06802	0.9382	0.22	1.4633	0.7606	2.7972	0.4114	1.0825	1.9564	3.9751	0.22	1.1498	2.8669	0.900053	0.211055	1.4038	0.729674	2.68347	0.394672	1.01356	1.83181	3.72195	0.205989	1.07657	2.68432		0.600209	0.116018	0.201221
3533	uridine-2',3'-cyclic monophosphate	Nucleotide	Pyrimidine Metabolism, Uracil containing	37137	LC/MS Neg	75	1090	305.018	439715	40632-52-8	C02355	HMDB11640	1.62787	1.4238	0.0344	0.3867	3.1088	0.4881	0.0344	0.353	0.4635	1.8187	2.2999	0.0344	0.1621	1.9777	0.0269237	0.302657	2.43315	0.38202	0.0269237	0.276281	0.325537	1.27736	1.61533	0.0241607	0.11385	1.38903		0.726611	0.431547	0.369814
929	phenylacetylglycine	Peptide	Acetylated Peptides	33945	LC/MS Pos Early	100001275	2317	194.081	68144	500-98-1	C05598	HMDB00821	1.75123	1.14625	0.5395	1.5019	0.9433	0.8885	0.5529	2.3306	0.472	0.5283	1.04	0.2974	0.3935	0.6221	0.335347	0.933563	0.586344	0.552281	0.343676	1.44867	0.411778	0.460894	0.907306	0.259455	0.343293	0.542726		1.43563	0.424936	0.367745
630	glycylisoleucine	Peptide	Dipeptide	36659	LC/MS Pos Early	100001790	3002	189.123	88079	19461-38-2		HMDB28844	0.798417	0.509183	0.6945	0.158	0.5883	0.5507	5.0521	0.158	0.158	1	0.158	0.158	0.158	0.158	0.409127	0.0930771	0.346565	0.324415	2.97617	0.0930771	0.310301	1.96393	0.310301	0.310301	0.310301	0.310301		1.2068	0.399945	0.357891
631	glycylleucine	Peptide	Dipeptide	34398	LC/MS Pos Early	100001258	3059	189.123	92843	869-19-2	C02155	HMDB00759	1.66775	0.848033	1.6713	0.5027	1.8096	1.1007	6.9871	0.3835	0.1043	1.6258	0.3517	0.1043	0.1043	0.3958	0.923379	0.277737	0.999788	0.608127	3.86031	0.21188	0.12299	1.91714	0.414724	0.12299	0.12299	0.466727		2.1724	0.319505	0.31949
641	glycylvaline	Peptide	Dipeptide	18357	LC/MS Pos Early	100000487	2734	175.108	97417	1963-21-9		HMDB28854	1.88658	0.993083	1.2731	0.5702	1.5458	1.0011	5.854	0.4632	0.2304	1.5892	0.3581	0.0791	0.1696	0.5667	0.777656	0.348299	0.944231	0.611508	3.57584	0.282939	0.232005	1.60027	0.360594	0.0796509	0.170781	0.570647		2.17007	0.399705	0.357891
646	histidylalanine	Peptide	Dipeptide	42027	LC/MS Pos Early	100003542	3014	227.114	351667	16874-75-2		HMDB28878	1.68382	0.84695	1.2989	0.961	0.6243	1.035	3.3451	0.2662	0.2662	2.5081	0.2662	0.2662	0.2662	0.3696	0.879577	0.650761	0.422757	0.700871	2.2652	0.180263	0.314304	2.96133	0.314304	0.314304	0.314304	0.436389		1.09549	0.953875	0.581619
665	isoleucylglycine	Peptide	Dipeptide	40008	LC/MS Neg	100003169	1992	187.109	342532	868-28-0		HMDB28907	2.22257	0.942267	2.1234	0.8348	3.9039	2.1006	11.0148	0.3446	0.1871	1.9095	0.4666	0.1871	0.2155	0.6047	1.05651	0.415361	1.94242	1.04517	5.4805	0.171458	0.198564	2.0265	0.495189	0.198564	0.228704	0.64175		2.66844	0.29183	0.303293
684	leucylglycine	Peptide	Dipeptide	40045	LC/MS Pos Early	100003185	2778	189.123	79070	686-50-0		HMDB28929	1.74878	0.9574	2.3399	1.7564	4.7141	2.1744	0.1776	0.413	0.3082	2.3501	0.6458	0.298	0.7421	0.7684	2.08783	1.56719	4.20626	1.94016	0.158468	0.368509	0.321914	2.45467	0.674535	0.31126	0.77512	0.80259		1.93413	0.680083	0.487331
733	phenylalanylalanine	Peptide	Dipeptide	41374	LC/MS Neg	100003589	2745	235.109	5488196	3918-87-4			1.55105	0.814	1.5838	1.3329	1.8649	1.4495	4.0455	0.2472	0.2472	1.5448	0.2472	0.2472	0.2472	0.4002	0.824917	0.694237	0.971327	0.754968	2.10709	0.128753	0.303686	1.89779	0.303686	0.303686	0.303686	0.491646		1.52082	0.237411	0.274023
737	phenylalanylglycine	Peptide	Dipeptide	41370	LC/MS Pos Early	100003588	2898	223.108	98207	721-90-4		HMDB28995	3.47427	1.4687	4.5913	2.3055	3.3475	3.1096	9.0489	0.5521	0.2321	2.2543	0.2862	0.1244	0.3337	0.6099	2.3865	1.19837	1.73999	1.61633	4.7035	0.286974	0.158031	1.53489	0.194866	0.0847008	0.227208	0.415265		4.56283	0.137457	0.21636
756	prolylglycine	Peptide	Dipeptide	40703	LC/MS Pos Early	100003674	2136	173.092	6426709	2578-57-6		HMDB11178	1.31062	0.918567	1.9448	0.818	1.2588	1.7266	5.7552	1	0.3631	1.25	0.3341	0.0721	0.2218	0.563	1.33468	0.561376	0.863888	1.18493	3.94967	0.686279	0.39529	1.36082	0.363719	0.0784919	0.241463	0.612911		2.8109	0.123849	0.206969
794	threonylphenylalanine	Peptide	Dipeptide	31530	LC/MS Neg	100001125	2322	265.119	4099799	16875-27-7		HMDB29068	1.40123	0.466517	1.3225	1.0439	1.8241	1.5383	1.7249	0.1667	0.1667	2.3843	0.1667	0.1667	0.1667	0.1667	0.625187	0.493484	0.862309	0.727203	0.815414	0.0788043	0.357329	5.11086	0.357329	0.357329	0.357329	0.357329		0.522276	0.775526	0.52067
804	tryptophylglycine	Peptide	Dipeptide	43028	LC/MS Pos Early	100003609	2930	262.119	263471	7360-09-0		HMDB29083	1.03152	0.40125	1	0.4672	1.4186	1.0746	1.429	0.2859	0.2859	0.2859	0.2859	0.2859	0.2859	0.2859	1.00757	0.470738	1.42934	1.08274	1.43982	0.288065	0.712523	0.712523	0.712523	0.712523	0.712523	0.712523		1.33757	0.328893	0.32564
820	tyrosylglycine	Peptide	Dipeptide	41375	LC/MS Neg	100003598	1635	237.088	259323	673-05-5		HMDB29105	1.6359	0.911067	1.3705	1.5883	2.717	2.1865	3.4366	0.4432	0.044	1.4915	0.1654	0.044	0.1913	0.5356	2.58163	2.9919	5.11805	4.11874	6.47357	0.834861	0.048295	1.63709	0.181545	0.048295	0.209974	0.587882		8.15262	0.0680864	0.175205
836	valylglutamine	Peptide	Dipeptide	42079	LC/MS Pos Early	100003640	2295	246.145	5253209	42854-54-6		HMDB29125	1.35378	1.1377	3.3326	0.8742	1.9831	1.6134	13.1449	0.1742	0.2377	1.2878	0.4419	0.0709	0.3329	0.6654	2.09644	0.549932	1.24751	1.01494	8.26905	0.109584	0.20893	1.13193	0.388415	0.0623187	0.292608	0.584864		4.97831	0.200195	0.251895
837	valylglycine	Peptide	Dipeptide	40475	LC/MS Pos Early	100003641	2444	175.108	136487	686-43-1		HMDB29127	0.884233	0.565417	1.7564	0.495	1.9268	1.3357	10.5374	0.1221	0.1221	0.6959	0.1221	0.1221	0.1221	0.1221	18.8051	5.29979	20.6296	14.3009	112.82	1.30728	0.215947	1.23077	0.215947	0.215947	0.215947	0.215947		74.9457	0.200416	0.251895
840	valylleucine	Peptide	Dipeptide	39994	LC/MS Pos Early	100003210	3138	231.17	352039	22906-55-4		HMDB29131	2.52493	1.35272	2.6743	1.253	3.9241	2.0169	7.7659	0.8502	0.1095	3.0677	0.2212	0.1095	0.6344	0.7031	1.47956	0.693223	2.17101	1.11585	4.29649	0.470373	0.0809482	2.26781	0.163523	0.0809482	0.468982	0.519769		2.85499	0.272259	0.292985
465	gamma-glutamylalanine	Peptide	Gamma-glutamyl Amino Acid	37063	LC/MS Pos Early	100001843	1986	219.098	440103	5875-41-2		HMDB29142	1.07037	1.2576	0.1844	0.1844	0.5738	0.6661	0.1844	0.1844	0.6838	0.1844	0.824	0.1844	1.6637	0.8505	0.157311	0.157311	0.489507	0.568248	0.157311	0.157311	0.543734	0.146628	0.655216	0.146628	1.32292	0.676288		0.483185	0.206169	0.257439
473	gamma-glutamyl-alpha-lysine	Peptide	Gamma-glutamyl Amino Acid	55015	LC/MS Pos Early	100010901	2784	276.155	65254				1.80783	1.4949	0.6558	0.5131	0.9661	0.8022	1.2522	1.1725	0.3633	0.5494	0.3769	0.0546	0.6759	1.1245	0.382112	0.298966	0.562913	0.467414	0.729614	0.683176	0.243026	0.367516	0.252124	0.0365242	0.452137	0.752224		1.4852	0.256799	0.284629
474	gamma-glutamyl-epsilon-lysine	Peptide	Gamma-glutamyl Amino Acid	33934	LC/MS Pos Early	100001262	2725	276.155	7015685	17105-15-6		HMDB03869	1.65412	1.89125	0.6963	0.7187	0.6181	1.3584	3.0208	4.0965	0.4711	0.9893	0.2291	0.0194	0.2429	2.4166	0.447503	0.461899	0.397245	0.873026	1.94143	2.63277	0.249095	0.523093	0.121137	0.0102578	0.128434	1.27778		2.92401	0.140371	0.218704
467	gamma-glutamylglutamate	Peptide	Gamma-glutamyl Amino Acid	36738	LC/MS Pos Early	331	1775	277.103	92865	1116-22-9	C05282	HMDB11737	1.01477	1.52092	0.4173	0.655	1.6372	1.5254	0.6067	0.4893	1.0115	1.3744	1.585	0.0357	1.3776	1.5153	0.286712	0.450027	1.12486	1.04805	0.416842	0.336181	0.665059	0.903666	1.04213	0.0234727	0.90577	0.996307		0.807395	0.667119	0.484069
468	gamma-glutamylglutamine	Peptide	Gamma-glutamyl Amino Acid	2730	LC/MS Pos Early	1140	1430	276.119	150914	10148-81-9	C05283	HMDB11738	1.13258	1.34602	0.0815	0.4133	1.4353	0.9855	0.0778	0.1492	0.5682	1.0145	1.3912	0.0268	1.085	1.2016	0.0473236	0.239986	0.833419	0.572239	0.0451752	0.0866342	0.422134	0.753705	1.03357	0.0199106	0.806082	0.892708		0.464543	0.467425	0.388452
469	gamma-glutamylglycine	Peptide	Gamma-glutamyl Amino Acid	33949	LC/MS Pos Early	100001294	1535	205.082	165527	1948-29-4		HMDB11667	1.01238	1.48173	0.2216	0.6757	4.978	1.3627	0.5474	0.4896	0.6119	1.3285	1.399	0.1461	1.2594	1.2834	0.137442	0.419086	3.08748	0.845181	0.339511	0.303662	0.412962	0.896585	0.944164	0.0986007	0.849951	0.866148		1.26152	0.395282	0.355759
470	gamma-glutamylhistidine	Peptide	Gamma-glutamyl Amino Acid	18245	LC/MS Pos Early	1235	2740	285.119	7017195	37460-15-4			1.22263	1.36538	0.3565	0.547	1.2266	1.0247	0.6517	0.6608	0.4845	0.605	0.6489	0.1892	1.0767	0.9413	0.221156	0.339334	0.760926	0.635677	0.404285	0.40993	0.354845	0.443099	0.475251	0.138569	0.78857	0.689403		0.959017	0.396018	0.355759
471	gamma-glutamylisoleucine*	Peptide	Gamma-glutamyl Amino Acid	34456	LC/MS Pos Early	100001485	2940	261.144	14253342			HMDB11170	1.32182	1.02405	0.5587	0.5293	0.882	0.9272	0.8814	0.5877	0.4248	0.4542	0.5353	0.0725	0.5455	0.996	0.51293	0.485938	0.809744	0.851241	0.809193	0.539554	0.414823	0.443533	0.522728	0.0707973	0.532689	0.972609		1.35555	0.673855	0.485875
472	gamma-glutamylleucine	Peptide	Gamma-glutamyl Amino Acid	18369	LC/MS Pos Early	1268	2991	261.144	151023	2566-39-4		HMDB11171	1.64328	1.17082	0.6122	0.6643	0.9984	0.9885	1.3388	0.7937	0.5253	0.9228	0.5379	0.075	0.5803	1.2497	0.480584	0.521483	0.783755	0.775984	1.05097	0.623064	0.448661	0.788168	0.459423	0.0640579	0.495637	1.06737		1.27458	0.966974	0.584729
475	gamma-glutamylmethionine	Peptide	Gamma-glutamyl Amino Acid	44872	LC/MS Pos Early	100001313	2640	279.101	7009567	17663-87-5		HMDB29155	1.84213	0.971833	0.0878	0.2782	0.909	1.2257	0.0987	0.1796	0.6668	1.1524	0.9105	0.0878	1.2995	1.0765	0.0721081	0.228479	0.74654	1.00664	0.08106	0.147501	0.686126	1.1858	0.936889	0.0903447	1.33716	1.1077		0.42708	0.0169953	0.147635
476	gamma-glutamylphenylalanine	Peptide	Gamma-glutamyl Amino Acid	33422	LC/MS Pos Early	100000491	2992	295.129	111299	7432-24-8		HMDB00594	1.54363	1.18223	0.3907	0.5266	1.0655	1.1136	0.6947	0.6916	0.5046	0.8107	0.5251	0.1035	0.4905	1.0531	0.222315	0.299644	0.606288	0.633657	0.395296	0.393532	0.426819	0.685736	0.444159	0.0875462	0.414893	0.890772		0.864677	0.956076	0.581619
481	gamma-glutamylserine	Peptide	Gamma-glutamyl Amino Acid	54914	LC/MS Pos Early	100009231	1351	235.092		5875-35-4			1.14493	1.21902	0.1608	0.5723	1.2773	1.0984	0.2394	0.2722	0.3785	0.9734	0.5565	0.0469	0.904	1.052	0.0977726	0.34798	0.776647	0.667869	0.145564	0.165508	0.310496	0.798512	0.456515	0.0384736	0.741581	0.862991		0.686082	0.972063	0.586061
477	gamma-glutamylthreonine	Peptide	Gamma-glutamyl Amino Acid	33364	LC/MS Pos Early	100001314	1750	249.108	76078708	5652-48-2		HMDB29159	1.03187	1.25388	0.5466	0.9702	1.0128	1.1287	0.7903	0.6544	1.245	0.6593	1.0366	0.0877	1.1557	0.9565	0.361871	0.642311	0.670514	0.747244	0.52321	0.433239	0.992915	0.525806	0.826712	0.0699427	0.921697	0.76283		0.824017	0.41677	0.365212
478	gamma-glutamyltryptophan	Peptide	Gamma-glutamyl Amino Acid	33947	LC/MS Pos Early	100001295	2975	334.14	3989307	66471-20-3		HMDB29160	1.49268	1.29032	0.4376	0.7732	1.3765	1.3676	0.6061	0.8286	0.8368	0.6474	1.0029	0.1774	1.1185	1.4647	0.255852	0.452067	0.804798	0.799595	0.354368	0.484458	0.648523	0.501737	0.777251	0.137486	0.866841	1.13515		0.774809	0.674358	0.485875
479	gamma-glutamyltyrosine	Peptide	Gamma-glutamyl Amino Acid	2734	LC/MS Neg	1102	1240	309.109	94340	7432-23-7		HMDB11741	2.62948	1.18568	0.1941	0.5414	1	1.0953	0.3568	0.4994	0.1941	0.6854	0.1941	0.1941	0.8493	0.9433	0.110117	0.307148	0.567322	0.621388	0.202421	0.283321	0.163703	0.578063	0.163703	0.163703	0.716296	0.795575		0.810415	0.187717	0.242668
480	gamma-glutamylvaline	Peptide	Gamma-glutamyl Amino Acid	43829	LC/MS Pos Early	100001126	2700	247.129	7015683	2746-34-1		HMDB11172	1.18653	0.98915	0.4038	0.4894	0.794	0.8109	0.5124	0.659	0.6036	0.547	0.638	0.0716	0.5441	0.6867	0.26819	0.325042	0.527347	0.538571	0.340318	0.437685	0.610221	0.553	0.644998	0.0723854	0.550068	0.694232		0.779913	0.961874	0.584231
6291	PC(12:0/16:1)	Phosphatidylcholine	PC Ester	53820	DMS-MS	100009968							0.9977	0.9977	0.9977	0.9977	0.9977	0.9977	0.9977	0.9977	0.9977	0.9977	0.9977	0.9977	0.9977	0.9977	1.54798	1.54798	1.54798	1.54798	1.54798	1.54798	1	1	1	1	1	1		1.54798	NA	NA
6292	PC(12:0/18:1)		PC Ester	54335	DMS-MS	100010483							1.16433	0.829533	0.8255	1.0429	0.6997	1.4365	0.5878	1.1791	0.7606	1	0.6258	1.1054	0.6904	0.4974	0.625166	0.789807	0.529895	1.08789	0.445151	0.892953	0.916901	1.2055	0.7544	1.33256	0.832275	0.599614		0.774804	0.49017	0.400486
6293	PC(12:0/18:2)		PC Ester	53290	DMS-MS	100009438							0.77705	0.458833	0.4268	0.4268	0.4268	0.4268	0.4268	0.4268	0.4268	0.4268	0.4268	0.4268	0.4268	0.4268	0.893697	0.893697	0.893697	0.893697	0.893697	0.893697	0.930185	0.930185	0.930185	0.930185	0.930185	0.930185		0.960773	NA	NA
6294	PC(12:0/18:3)		PC Ester	53821	DMS-MS	100009969							1	1	1	1	1	1	1	1	1	1	1	1	1	1	1.20744	1.20744	1.20744	1.20744	1.20744	1.20744	1	1	1	1	1	1		1.20744	NA	NA
6296	PC(12:0/20:1)		PC Ester	53291	DMS-MS	100009439							0.554867	0.606167	0.5036	0.5036	0.5036	0.5036	0.6914	0.5036	0.5036	0.5036	0.5036	0.5036	0.5089	0.5036	0.389391	0.389391	0.389391	0.389391	0.534601	0.389391	0.830795	0.830795	0.830795	0.830795	0.839538	0.830795		0.496957	0.066722	0.175205
6299	PC(12:0/20:4)		PC Ester	53488	DMS-MS	100009636							0.91745	0.959433	1	1.0804	1.814	2.2303	0.6791	0.9916	0.4377	1.9842	0.4377	1.5972	0.6115	0.4377	0.848344	0.916551	1.5389	1.89206	0.576111	0.841218	0.456207	2.0681	0.456207	1.66473	0.637355	0.456207		1.15236	0.271222	0.292437
6300	PC(12:0/20:5)		PC Ester	53995	DMS-MS	100010143							0.4626	0.552167	0.4626	0.4626	0.4626	0.4626	0.4626	0.4626	0.4626	0.4626	0.4626	0.4626	0.4626	0.4626	0.408333	0.408333	0.408333	0.408333	0.408333	0.408333	0.837791	0.837791	0.837791	0.837791	0.837791	0.837791		0.487392	NA	NA
6302	PC(12:0/22:4)		PC Ester	54336	DMS-MS	100010484							0.432967	0.622283	1.463	0.9587	1	0.4274	0.715	0.4274	0.4274	1.4304	0.4274	1.0411	0.4556	0.4274	1.7709	1.16047	1.21046	0.51735	0.865478	0.51735	0.686825	2.29863	0.686825	1.67303	0.732142	0.686825		0.893222	0.123234	0.206692
6303	PC(12:0/22:5)		PC Ester	54522	DMS-MS	100010670							1	1	1	1	1	1	1	1	1	1	1	1	1	1	1.12914	1.12914	1.12914	1.12914	1.12914	1.12914	1	1	1	1	1	1		1.12914	NA	NA
6304	PC(12:0/22:6)		PC Ester	53489	DMS-MS	100009637							0.6718	0.6718	0.6718	0.6718	0.6718	0.6718	0.6718	0.6718	0.6718	0.6718	0.6718	0.6718	0.6718	0.6718	0.75123	0.75123	0.75123	0.75123	0.75123	0.75123	1	1	1	1	1	1		0.75123	NA	NA
6305	PC(14:0/14:0)		PC Ester	53293	DMS-MS	100009441							0.9064	0.741783	1.1608	0.6266	1.0778	0.6266	0.8837	0.6266	0.6266	0.6266	0.6266	0.8193	0.6266	0.6266	1.08168	0.583889	1.00433	0.583889	0.823464	0.583889	0.844721	0.844721	0.844721	1.1045	0.844721	0.844721		0.874821	0.796379	0.528808
6307	PC(14:0/16:1)		PC Ester	54151	DMS-MS	100010299							0.9663	1.0497	2.6039	1.0053	1.0723	0.8409	1.7007	0.684	0.4487	0.8269	0.4487	0.9787	1.1469	0.4487	1.96249	0.757669	0.808165	0.633765	1.28177	0.515513	0.427455	0.787749	0.427455	0.932362	1.0926	0.427455		1.45525	0.0785209	0.178685
6308	PC(14:0/18:1)		PC Ester	53996	DMS-MS	100010144							0.817567	0.842267	1.53	0.9924	1.1645	0.752	1.0994	0.621	0.488	0.6036	0.1691	1.1757	1.2139	0.2285	1.51198	0.980713	1.15079	0.743144	1.08645	0.613687	0.579389	0.716638	0.200768	1.39588	1.44123	0.271292		1.32172	0.106496	0.194182
6309	PC(14:0/18:2)		PC Ester	54152	DMS-MS	100010300							1.12338	0.770283	1.9622	0.7736	1.501	0.8973	1.2719	0.5328	0.4423	0.5206	0.1736	0.9061	1.2321	0.4249	1.24376	0.490355	0.951425	0.568763	0.806208	0.337721	0.574204	0.675855	0.225372	1.17632	1.59954	0.551615		0.915744	0.431091	0.369814
6310	PC(14:0/18:3)		PC Ester	53294	DMS-MS	100009442							0.5995	0.5995	0.5995	0.5995	0.5995	0.5995	0.5995	0.5995	0.5995	0.5995	0.5995	0.5995	0.5995	0.5995	0.369579	0.369579	0.369579	0.369579	0.369579	0.369579	1	1	1	1	1	1		0.369579	NA	NA
6312	PC(14:0/20:1)		PC Ester	54337	DMS-MS	100010485							0.379417	0.3957	0.3721	0.3721	1.1105	0.3721	0.3721	0.3721	0.3721	0.3721	0.3721	0.3721	0.3721	0.3721	0.259369	0.259369	0.774065	0.259369	0.259369	0.259369	0.940359	0.940359	0.940359	0.940359	0.940359	0.940359		0.367043	0.311898	0.316295
6313	PC(14:0/20:2)		PC Ester	53652	DMS-MS	100009800							0.584783	0.4994	0.3046	0.8711	2.1795	0.3046	0.3046	0.3046	0.3046	0.3046	0.3046	0.3046	0.7046	0.3046	0.197583	0.56505	1.41376	0.197583	0.197583	0.197583	0.609932	0.609932	0.609932	0.609932	1.41089	0.609932		0.620807	0.419038	0.365612
6314	PC(14:0/20:3)		PC Ester	53823	DMS-MS	100009971							0.8356	0.651183	0.8828	0.7875	1.4	1.2176	0.7897	0.53	0.5594	0.53	0.53	0.5952	1.0052	0.53	0.846567	0.755178	1.34254	1.16763	0.757288	0.508247	0.859051	0.813903	0.813903	0.914028	1.54365	0.813903		0.933837	0.436016	0.371744
6315	PC(14:0/20:4)		PC Ester	54338	DMS-MS	100010486							1.00762	0.933133	1.3271	1.0258	2.3883	1.1248	1.2886	0.6059	0.3511	0.682	0.2967	0.84	0.9259	0.321	0.881316	0.681225	1.58605	0.74697	0.855748	0.402373	0.376259	0.730871	0.317961	0.900193	0.992248	0.344002		1.40752	0.0398993	0.17396
6316	PC(14:0/20:5)		PC Ester	54523	DMS-MS	100010671							0.9775	0.9775	0.9775	0.9775	0.9775	0.9775	0.9775	0.9775	0.9775	0.9775	0.9775	0.9775	0.9775	0.9775	#REF!	#REF!	#REF!	#REF!	#REF!	#REF!	1	1	1	1	1	1		#REF!	NA	NA
6319	PC(14:0/22:4)		PC Ester	54153	DMS-MS	100010301							1.0591	0.981733	1.8248	1.2932	2.6836	0.6736	1.8842	0.583	0.3541	0.9465	0.3541	1.1403	0.8698	0.3541	#REF!	#REF!	#REF!	#REF!	#REF!	#REF!	0.360689	0.964111	0.360689	1.16152	0.885984	0.360689		#REF!	0.0714535	0.175205
6320	PC(14:0/22:5)		PC Ester	53998	DMS-MS	100010146							0.620317	0.724617	1.531	0.9762	0.5045	0.5045	1.1506	0.5045	0.5045	1.4112	0.5045	0.5045	0.5886	0.5045	#REF!	#REF!	#REF!	#REF!	#REF!	#REF!	0.69623	1.94751	0.69623	0.69623	0.812292	0.69623		#REF!	0.216138	0.262106
6321	PC(14:0/22:6)		PC Ester	53999	DMS-MS	100010147							0.805867	0.70025	1.0688	1.0187	1.1968	0.4854	1	0.4854	0.4854	0.8254	0.4854	0.8107	0.7608	0.4854	#REF!	#REF!	#REF!	#REF!	#REF!	#REF!	0.693181	1.17872	0.693181	1.15773	1.08647	0.693181		#REF!	0.388255	0.351409
6322	PC(15:0/14:1)		PC Ester	54524	DMS-MS	100010672							0.5469	0.5469	0.5469	0.5469	0.5469	0.5469	0.5469	0.5469	0.5469	0.5469	0.5469	0.5469	0.5469	0.5469	#REF!	#REF!	#REF!	#REF!	#REF!	#REF!	1	1	1	1	1	1		#REF!	NA	NA
6323	PC(15:0/16:1)		PC Ester	54525	DMS-MS	100010673							0.714367	0.750367	1.2335	0.9844	0.4317	0.4317	0.4317	0.4317	0.4317	0.4317	0.4317	0.4317	0.8433	0.4317	#REF!	#REF!	#REF!	#REF!	#REF!	#REF!	0.575319	0.575319	0.575319	0.575319	1.12385	0.575319		#REF!	0.296009	0.305566
6324	PC(15:0/18:1)		PC Ester	54526	DMS-MS	100010674							0.8406	1.04147	1.6221	1.434	1.0634	1.0208	1.3027	0.6353	0.5137	0.5559	0.363	0.7575	0.9781	0.363	#REF!	#REF!	#REF!	#REF!	#REF!	#REF!	0.493247	0.533766	0.348547	0.72734	0.939156	0.348547		#REF!	0.00269547	0.0772128
6325	PC(15:0/18:2)		PC Ester	54154	DMS-MS	100010302							0.789617	1.02445	1.2749	0.9638	0.7456	1.1865	0.8158	0.4182	0.4182	0.4182	0.4182	0.4182	0.4827	0.4182	#REF!	#REF!	#REF!	#REF!	#REF!	#REF!	0.408219	0.408219	0.408219	0.408219	0.47118	0.408219		#REF!	0.00655134	0.102833
6327	PC(15:0/20:3)		PC Ester	54339	DMS-MS	100010487							0.89425	0.907433	0.8926	0.8926	0.8926	0.8926	0.8926	0.8926	0.8926	0.8926	0.8926	0.8926	1.0184	0.8926	#REF!	#REF!	#REF!	#REF!	#REF!	#REF!	0.983654	0.983654	0.983654	0.983654	1.12229	0.983654		#REF!	0.724869	0.501326
6328	PC(15:0/20:4)		PC Ester	53295	DMS-MS	100009443							0.5774	0.8485	0.7593	1.579	0.42	0.42	1.0218	0.42	0.42	0.42	0.42	0.42	0.4957	0.42	#REF!	#REF!	#REF!	#REF!	#REF!	#REF!	0.494991	0.494991	0.494991	0.494991	0.584207	0.494991		#REF!	0.0544368	0.17396
6330	PC(15:0/22:4)		PC Ester	53824	DMS-MS	100009972							1	1	1	1	1	1	1	1	1	1	1	1	1	1	#REF!	#REF!	#REF!	#REF!	#REF!	#REF!	1	1	1	1	1	1		#REF!	NA	NA
6332	PC(15:0/22:6)		PC Ester	53654	DMS-MS	100009802							0.2246	0.2246	0.2246	0.2246	0.2246	0.2246	0.2246	0.2246	0.2246	0.2246	0.2246	0.2246	0.2246	0.2246	#REF!	#REF!	#REF!	#REF!	#REF!	#REF!	1	1	1	1	1	1		#REF!	NA	NA
6333	PC(16:0/12:0)		PC Ester	54527	DMS-MS	100010675							0.706783	0.966617	0.9704	1.1029	0.3841	0.3841	0.7133	0.3841	0.3841	0.948	0.3841	0.3841	0.7272	0.3841	#REF!	#REF!	#REF!	#REF!	#REF!	#REF!	0.397365	0.98074	0.397365	0.397365	0.752315	0.397365		#REF!	0.118068	0.203183
6334	PC(16:0/14:0)		PC Ester	53490	DMS-MS	100009638							1.02488	1.09118	4.0088	1.3584	1.6373	0.7583	2.9337	0.6178	0.649	0.7959	0.1432	1.9137	2.3186	0.1788	#REF!	#REF!	#REF!	#REF!	#REF!	#REF!	0.594767	0.729392	0.131234	1.75378	2.12485	0.163859		#REF!	0.178088	0.237561
6335	PC(16:0/14:1)		PC Ester	54340	DMS-MS	100010488							0.6154	0.700083	1.6743	0.6154	0.6154	0.6154	0.8765	0.6154	0.6154	0.6154	0.6154	0.6154	0.6154	0.6154	#REF!	#REF!	#REF!	#REF!	#REF!	#REF!	0.879038	0.879038	0.879038	0.879038	0.879038	0.879038		#REF!	0.149712	0.223427
6336	PC(16:0/16:0)		PC Ester	53655	DMS-MS	100009803							0.915883	0.98585	2.4915	1.169	1.5494	0.8343	2.2212	0.9001	0.5387	0.8113	0.147	1.0082	1.1143	0.2412	#REF!	#REF!	#REF!	#REF!	#REF!	#REF!	0.546432	0.822945	0.14911	1.02267	1.13029	0.244662		#REF!	0.0211903	0.159811
6337	PC(16:0/16:1)		PC Ester	53491	DMS-MS	100009639							0.844333	0.996817	3.4935	1.1699	1.0206	0.7017	2.8708	0.8499	0.8702	0.8014	0.3736	1.3387	1.7067	0.2327	#REF!	#REF!	#REF!	#REF!	#REF!	#REF!	0.872979	0.803959	0.374793	1.34298	1.71215	0.233443		#REF!	0.119958	0.204172
6338	PC(16:0/18:0)		PC Ester	54157	DMS-MS	100010305							0.985417	0.6923	1.4526	0.6837	1.4999	1.2326	1.2377	1.0501	0.2385	1.0738	0.2062	0.8132	0.6499	0.6239	#REF!	#REF!	#REF!	#REF!	#REF!	#REF!	0.344504	1.55106	0.297848	1.17464	0.938755	0.901199		#REF!	0.17753	0.237256
6339	PC(16:0/18:1)		PC Ester	53656	DMS-MS	100009804							0.805767	0.711083	1.5261	1.3142	1.3108	0.6823	1.497	0.6373	0.4909	0.9965	0.2306	1.2828	1.6253	0.2107	#REF!	#REF!	#REF!	#REF!	#REF!	#REF!	0.690355	1.40138	0.324294	1.80401	2.28567	0.296308		#REF!	0.455575	0.382401
6340	PC(16:0/18:2)		PC Ester	54341	DMS-MS	100010489							0.95865	0.848667	1.855	1.0102	1.1551	0.8186	1.5112	0.8658	0.5889	0.7726	0.4623	0.8499	1.1623	0.4613	#REF!	#REF!	#REF!	#REF!	#REF!	#REF!	0.693912	0.910369	0.544737	1.00145	1.36956	0.543559		#REF!	0.0888626	0.181453
6341	PC(16:0/18:3)		PC Ester	53825	DMS-MS	100009973							0.892317	1.40995	2.5608	1.1127	1.1965	0.7886	2.2308	0.7317	0.5545	1.2422	0.4736	1.3253	1.7193	0.3302	#REF!	#REF!	#REF!	#REF!	#REF!	#REF!	0.393276	0.881024	0.335898	0.939962	1.2194	0.234193		#REF!	0.0454864	0.17396
6343	PC(16:0/20:1)		PC Ester	53657	DMS-MS	100009805							0.88465	0.809667	1.0393	1.3052	2.4006	0.9469	1.0239	0.4607	0.4575	0.7268	0.1375	1.513	1.7243	0.3213	#REF!	#REF!	#REF!	#REF!	#REF!	#REF!	0.565047	0.897653	0.169823	1.86867	2.12964	0.39683		#REF!	0.455059	0.382316
6344	PC(16:0/20:2)		PC Ester	54528	DMS-MS	100010676							0.929483	0.568283	1.1411	1.3718	2.2808	0.9477	1.3576	0.487	0.3412	0.6034	0.1242	0.8993	1.29	0.1136	#REF!	#REF!	#REF!	#REF!	#REF!	#REF!	0.600405	1.06179	0.218553	1.58249	2.26999	0.1999		#REF!	0.40383	0.360317
6345	PC(16:0/20:3)		PC Ester	53296	DMS-MS	100009444							0.8213	0.7494	1.0759	1.1442	1.429	0.7135	1.0279	0.5192	0.3394	0.7528	0.1886	0.934	1.1633	0.1453	#REF!	#REF!	#REF!	#REF!	#REF!	#REF!	0.452896	1.00454	0.251668	1.24633	1.55231	0.193888		#REF!	0.173527	0.234976
6346	PC(16:0/20:4)		PC Ester	54158	DMS-MS	100010306							0.89335	1.03985	1.2275	1.2693	1.4877	0.7484	1.3406	0.7398	0.4255	1.0052	0.1385	1.0022	0.9978	0.1357	#REF!	#REF!	#REF!	#REF!	#REF!	#REF!	0.409194	0.966678	0.133192	0.963793	0.959561	0.1305		#REF!	0.012979	0.127139
6347	PC(16:0/20:5)		PC Ester	54159	DMS-MS	100010307							0.706917	1.41838	1.2188	1.0044	0.8434	0.6736	1.2096	0.6277	0.3878	1.2684	0.3584	1.3119	1.1889	0.3258	#REF!	#REF!	#REF!	#REF!	#REF!	#REF!	0.27341	0.894258	0.252682	0.924926	0.838208	0.229698		#REF!	0.00467035	0.0920434
6348	PC(16:0/22:1)		PC Ester	54160	DMS-MS	100010308							0.7551	0.589467	0.4396	0.7808	1.8671	0.4396	0.7305	0.4396	0.4396	0.4396	0.4396	0.9351	1.2935	0.4396	#REF!	#REF!	#REF!	#REF!	#REF!	#REF!	0.745759	0.745759	0.745759	1.58635	2.19436	0.745759		#REF!	0.822316	0.538924
6349	PC(16:0/22:2)		PC Ester	54002	DMS-MS	100010150							0.726917	0.65635	1.1504	0.5306	1.5417	0.95	1.3281	0.9403	0.5306	0.5306	0.5306	1.0695	1.2885	0.5306	#REF!	#REF!	#REF!	#REF!	#REF!	#REF!	0.80841	0.80841	0.80841	1.62947	1.96313	0.80841		#REF!	0.269791	0.292093
6350	PC(16:0/22:4)		PC Ester	54161	DMS-MS	100010309							1.08678	1.0201	2.5769	1.6704	2.3924	0.9041	2.6259	0.7944	0.5195	1.2715	0.1093	1.5597	1.3077	0.091	#REF!	#REF!	#REF!	#REF!	#REF!	#REF!	0.509264	1.24645	0.107146	1.52897	1.28193	0.0892069		#REF!	0.0549283	0.17396
6351	PC(16:0/22:5)		PC Ester	54529	DMS-MS	100010677							0.98215	0.809883	1.1534	1.2487	1.2992	0.7992	1.2343	0.6746	0.3272	0.9676	0.136	1.0911	0.8558	0.1324	#REF!	#REF!	#REF!	#REF!	#REF!	#REF!	0.404009	1.19474	0.167925	1.34723	1.0567	0.16348		#REF!	0.178274	0.237561
6352	PC(16:0/22:6)		PC Ester	54003	DMS-MS	100010151							1.21515	0.964733	1.7357	1.6479	1.6505	0.7838	1.801	0.9664	0.373	0.8059	0.1138	0.9792	1.2647	0.1921	#REF!	#REF!	#REF!	#REF!	#REF!	#REF!	0.386635	0.83536	0.11796	1.015	1.31093	0.199122		#REF!	0.0571276	0.17396
6353	PC(17:0/14:1)		PC Ester	54342	DMS-MS	100010490							0.66305	0.7101	1.6412	1.4633	0.9802	0.4961	1.0812	0.4961	0.4961	0.4961	0.4961	0.7725	0.4961	0.4961	#REF!	#REF!	#REF!	#REF!	#REF!	#REF!	0.698634	0.698634	0.698634	1.08787	0.698634	0.698634		#REF!	0.0436521	0.17396
6354	PC(17:0/16:1)		PC Ester	53658	DMS-MS	100009806							0.500033	0.516367	1.5545	1.2871	0.4221	0.4221	1.6162	0.4221	0.4221	0.4221	0.4221	0.4221	0.972	0.4221	#REF!	#REF!	#REF!	#REF!	#REF!	#REF!	0.817442	0.817442	0.817442	0.817442	1.88238	0.817442		#REF!	0.124577	0.207434
6355	PC(17:0/18:1)		PC Ester	54162	DMS-MS	100010310							0.791083	0.737067	1.7405	1.0889	1.1351	0.8963	1.6112	0.7452	0.4496	0.6606	0.2383	0.8343	0.982	0.2383	#REF!	#REF!	#REF!	#REF!	#REF!	#REF!	0.609986	0.896255	0.323309	1.13192	1.33231	0.323309		#REF!	0.0186499	0.151972
6356	PC(17:0/18:2)		PC Ester	54163	DMS-MS	100010311							1.07062	1.04977	1.7689	0.876	1.4152	1.3939	1.3651	1.069	0.6011	0.8396	0.3205	0.6208	0.5467	0.6555	#REF!	#REF!	#REF!	#REF!	#REF!	#REF!	0.572603	0.799797	0.305306	0.59137	0.520782	0.624424		#REF!	0.00129958	0.0727612
6357	PC(17:0/18:3)		PC Ester	53297	DMS-MS	100009445							0.5223	0.603583	0.5223	0.5223	0.5223	0.5223	0.5223	0.5223	0.5223	0.5223	0.5223	0.5223	0.5223	0.5223	#REF!	#REF!	#REF!	#REF!	#REF!	#REF!	0.865332	0.865332	0.865332	0.865332	0.865332	0.865332		#REF!	NA	NA
6358	PC(17:0/20:3)		PC Ester	54343	DMS-MS	100010491							0.803667	0.68185	1.0196	1.1677	1.4574	0.7564	1.418	0.594	0.594	0.594	0.594	0.594	0.7196	0.594	#REF!	#REF!	#REF!	#REF!	#REF!	#REF!	0.871159	0.871159	0.871159	0.871159	1.05536	0.871159		#REF!	0.0602238	0.174063
6359	PC(17:0/20:4)		PC Ester	53826	DMS-MS	100009974							0.953017	0.79775	1.5097	1.7952	1.1624	0.5874	1.9413	0.6418	0.6318	0.627	0.1786	0.5667	0.8328	0.1786	#REF!	#REF!	#REF!	#REF!	#REF!	#REF!	0.791977	0.785961	0.22388	0.710373	1.04394	0.22388		#REF!	0.0373911	0.17396
6360	PC(17:0/20:5)		PC Ester	53298	DMS-MS	100009446							1	1	1	1	1	1	1	1	1	1	1	1	1	1	#REF!	#REF!	#REF!	#REF!	#REF!	#REF!	1	1	1	1	1	1		#REF!	NA	NA
6361	PC(17:0/22:4)		PC Ester	53827	DMS-MS	100009975							0.6771	0.6771	0.6771	0.6771	0.6771	0.6771	1.3229	0.6771	0.6771	0.6771	0.6771	0.6771	0.6771	0.6771	#REF!	#REF!	#REF!	#REF!	#REF!	#REF!	1	1	1	1	1	1		#REF!	0.363217	0.338856
6362	PC(17:0/22:5)		PC Ester	54344	DMS-MS	100010492							1	1	1	1	1	1	1	1	1	1	1	1	1	1	#REF!	#REF!	#REF!	#REF!	#REF!	#REF!	1	1	1	1	1	1		#REF!	NA	NA
6363	PC(17:0/22:6)		PC Ester	53659	DMS-MS	100009807							0.621	0.6143	1	0.9774	0.6143	0.6143	1.0653	0.6143	0.6143	0.6143	0.6143	0.6143	0.6314	0.6143	#REF!	#REF!	#REF!	#REF!	#REF!	#REF!	1	1	1	1	1.02784	1		#REF!	0.0885534	0.181453
6364	PC(18:0/12:0)		PC Ester	53828	DMS-MS	100009976							0.69675	1.05225	1.3528	1.5716	0.9752	1.1209	0.813	1.0881	0.4275	1.1577	0.4275	1.2084	0.8725	0.4275	#REF!	#REF!	#REF!	#REF!	#REF!	#REF!	0.406272	1.10021	0.406272	1.1484	0.829176	0.406272		#REF!	0.00144413	0.0727612
6365	PC(18:0/14:0)		PC Ester	54004	DMS-MS	100010152							0.943767	0.8771	2.4111	0.988	1.4044	0.3901	2.0001	0.7813	0.5299	0.3901	0.3901	1.012	1.9308	0.3901	#REF!	#REF!	#REF!	#REF!	#REF!	#REF!	0.60415	0.444761	0.444761	1.1538	2.20135	0.444761		#REF!	0.257673	0.284856
6367	PC(18:0/16:1)		PC Ester	53830	DMS-MS	100009978							0.79235	0.99655	2.912	1.2584	1.077	0.9334	2.4073	0.6385	1.1027	0.9153	1.2681	1.2122	1.6362	0.5287	#REF!	#REF!	#REF!	#REF!	#REF!	#REF!	1.10652	0.918469	1.27249	1.2164	1.64186	0.53053		#REF!	0.143085	0.220012
6368	PC(18:0/18:0)		PC Ester	53660	DMS-MS	100009808							0.803417	0.749883	1.1851	1.271	1.2553	1.1102	1.1121	0.7876	0.4689	0.9988	0.277	1.0315	0.8085	0.2825	#REF!	#REF!	#REF!	#REF!	#REF!	#REF!	0.625297	1.33194	0.369391	1.37555	1.07817	0.376725		#REF!	0.0367432	0.17396
6369	PC(18:0/18:1)		PC Ester	54530	DMS-MS	100010678							0.990267	0.778317	1.7007	1.6643	1.9448	0.8851	1.7365	0.5475	0.5625	1.0654	0.4907	1.163	1.8822	0.3642	#REF!	#REF!	#REF!	#REF!	#REF!	#REF!	0.722714	1.36885	0.630463	1.49425	2.4183	0.467933		#REF!	0.534824	0.426324
6370	PC(18:0/18:2)		PC Ester	54345	DMS-MS	100010493							1.0851	0.731783	2.1671	1.0975	1.5797	0.9419	1.6735	0.8406	0.525	0.8893	0.7018	0.7726	1.4398	0.6392	#REF!	#REF!	#REF!	#REF!	#REF!	#REF!	0.717425	1.21525	0.959027	1.05578	1.96752	0.873483		#REF!	0.598724	0.455248
6371	PC(18:0/18:3)		PC Ester	54164	DMS-MS	100010312							0.777633	0.682783	1.7668	1.0295	1	0.6013	1.4011	0.5975	0.4314	1.1703	0.7098	1.0684	1.7755	0.365	#REF!	#REF!	#REF!	#REF!	#REF!	#REF!	0.631826	1.71401	1.03957	1.56477	2.60039	0.534577		#REF!	0.954438	0.581619
6373	PC(18:0/20:0)		PC Ester	54166	DMS-MS	100010314							0.877083	0.841083	2.1131	1.5323	1.4885	1.0694	1.8621	0.8108	0.564	1.0281	0.2202	1.0384	0.9216	0.2202	#REF!	#REF!	#REF!	#REF!	#REF!	#REF!	0.670564	1.22235	0.261805	1.2346	1.09573	0.261805		#REF!	0.0124457	0.125969
6374	PC(18:0/20:1)		PC Ester	53299	DMS-MS	100009447							0.775533	0.626467	0.7497	1.2369	2.4385	0.805	0.7083	0.1857	0.5743	0.7369	0.1857	1.0828	1.4578	0.1857	#REF!	#REF!	#REF!	#REF!	#REF!	#REF!	0.916729	1.17628	0.296424	1.72842	2.32702	0.296424		#REF!	0.720148	0.500517
6375	PC(18:0/20:2)		PC Ester	53300	DMS-MS	100009448							1.0409	0.599167	0.8657	1.6664	2.9385	0.8226	1.212	0.3164	0.3532	0.595	0.2003	0.7452	1.6452	0.133	#REF!	#REF!	#REF!	#REF!	#REF!	#REF!	0.589485	0.993046	0.334298	1.24373	2.74581	0.221975		#REF!	0.668196	0.484469
6376	PC(18:0/20:3)		PC Ester	54531	DMS-MS	100010679							0.926767	0.740433	1.421	1.4711	2.152	0.9364	1.3848	0.5425	0.3354	0.7329	0.2615	0.8476	1.5267	0.1565	#REF!	#REF!	#REF!	#REF!	#REF!	#REF!	0.452978	0.989826	0.353172	1.14474	2.0619	0.211363		#REF!	0.166713	0.232239
6377	PC(18:0/20:4)		PC Ester	54167	DMS-MS	100010315							0.946783	0.901283	1.5726	1.5173	2.1151	0.8333	1.7091	0.7842	0.3567	0.9177	0.1462	0.8646	1.1267	0.1324	#REF!	#REF!	#REF!	#REF!	#REF!	#REF!	0.395769	1.01821	0.162213	0.959299	1.25011	0.146902		#REF!	0.0176161	0.149492
6378	PC(18:0/20:5)		PC Ester	54168	DMS-MS	100010316							0.7436	0.852117	1.3873	1.2461	0.9628	0.6662	1.411	0.7465	0.3672	0.9441	0.3598	1.1942	1.361	0.3598	#REF!	#REF!	#REF!	#REF!	#REF!	#REF!	0.430927	1.10795	0.422243	1.40145	1.5972	0.422243		#REF!	0.0862398	0.181453
6379	PC(18:0/22:1)		PC Ester	54169	DMS-MS	100010317							0.858	0.858	0.858	0.858	0.858	0.858	0.858	0.858	0.858	0.858	0.858	0.858	1	0.858	#REF!	#REF!	#REF!	#REF!	#REF!	#REF!	1	1	1	1	1.1655	1		#REF!	0.363217	0.338856
6380	PC(18:0/22:2)		PC Ester	53661	DMS-MS	100009809							0.854	0.854	0.854	0.854	0.854	0.854	0.854	0.854	0.854	0.854	0.854	0.854	0.854	0.854	#REF!	#REF!	#REF!	#REF!	#REF!	#REF!	1	1	1	1	1	1		#REF!	NA	NA
6381	PC(18:0/22:4)		PC Ester	53831	DMS-MS	100009979							1.13323	0.985083	2.7999	1.7653	2.9	0.9297	2.9222	0.5771	0.3014	1.1535	0.0882	1.0237	1.4954	0.0882	#REF!	#REF!	#REF!	#REF!	#REF!	#REF!	0.305964	1.17097	0.0895356	1.0392	1.51804	0.0895356		#REF!	0.0477946	0.17396
6382	PC(18:0/22:5)		PC Ester	53662	DMS-MS	100009810							0.97375	0.84605	1.64	1.3283	1.7963	1	1.6729	0.7536	0.248	1.0832	0.128	0.8089	0.972	0.128	#REF!	#REF!	#REF!	#REF!	#REF!	#REF!	0.293127	1.2803	0.151291	0.95609	1.14887	0.151291		#REF!	0.0237797	0.168247
6383	PC(18:0/22:6)		PC Ester	54170	DMS-MS	100010318							1.05723	0.899417	2.2058	1.7537	2.4663	0.9156	2.3715	0.9401	0.2453	0.6533	0.1171	0.9047	1.5484	0.1442	#REF!	#REF!	#REF!	#REF!	#REF!	#REF!	0.272732	0.72636	0.130195	1.00587	1.72156	0.160326		#REF!	0.021539	0.159811
6385	PC(18:1/16:1)		PC Ester	54346	DMS-MS	100010494							0.883867	0.834733	1.8243	1.1717	0.9933	0.7892	1.678	0.7645	1.1696	0.7844	0.5444	1.4629	1.876	0.3414	#REF!	#REF!	#REF!	#REF!	#REF!	#REF!	1.40117	0.939701	0.652184	1.75254	2.24742	0.408993		#REF!	0.72509	0.501326
6386	PC(18:1/18:1)		PC Ester	53832	DMS-MS	100009980							0.867717	0.7658	1.4717	1.1826	1.1971	0.8456	1.3948	0.5736	0.938	0.6284	0.4074	1.2974	1.6792	0.3669	#REF!	#REF!	#REF!	#REF!	#REF!	#REF!	1.22486	0.82058	0.531993	1.69418	2.19274	0.479107		#REF!	0.71206	0.496716
6387	PC(18:1/18:2)		PC Ester	53833	DMS-MS	100009981							0.950183	0.816017	1.8654	0.9974	1.1249	0.8183	1.5046	0.7272	1.0026	0.5798	0.6231	0.9217	1.5141	0.6883	#REF!	#REF!	#REF!	#REF!	#REF!	#REF!	1.22865	0.710525	0.763587	1.12951	1.85548	0.843488		#REF!	0.581392	0.447239
6388	PC(18:1/18:3)		PC Ester	54347	DMS-MS	100010495							0.820567	0.938183	1.5392	0.8435	1.2715	0.4559	1.4968	0.7835	0.8726	0.99	0.7327	1.0842	1.5579	0.4559	#REF!	#REF!	#REF!	#REF!	#REF!	#REF!	0.930095	1.05523	0.780977	1.15564	1.66055	0.485939		#REF!	0.316436	0.318229
6390	PC(18:1/20:1)		PC Ester	53493	DMS-MS	100009641							0.94625	0.9224	0.7754	1.4043	2.6044	0.8733	0.8245	0.3214	0.594	0.7462	0.3005	2.1034	2.3786	0.3005	#REF!	#REF!	#REF!	#REF!	#REF!	#REF!	0.643972	0.808977	0.325781	2.28036	2.57871	0.325781		#REF!	0.94533	0.581081
6391	PC(18:1/20:2)		PC Ester	54171	DMS-MS	100010319							0.869333	0.645117	1.1176	1.3772	2.1578	0.9414	1.1873	0.3671	0.5545	0.5318	0.1941	1.1717	1.9901	0.1941	#REF!	#REF!	#REF!	#REF!	#REF!	#REF!	0.859534	0.824347	0.300876	1.81626	3.08487	0.300876		#REF!	0.747446	0.510191
6392	PC(18:1/20:3)		PC Ester	54532	DMS-MS	100010680							0.847017	0.7504	1.1114	1.1346	1.4094	0.6977	1.098	0.4585	0.6079	0.6183	0.251	0.9672	1.5737	0.2042	#REF!	#REF!	#REF!	#REF!	#REF!	#REF!	0.810101	0.823961	0.334488	1.28891	2.09715	0.272122		#REF!	0.505162	0.408865
6393	PC(18:1/20:4)		PC Ester	54172	DMS-MS	100010320							0.918267	0.9985	1.511	1.3441	1.5024	0.8391	1.5736	0.7068	0.7208	0.8076	0.168	0.9974	1.3158	0.1855	#REF!	#REF!	#REF!	#REF!	#REF!	#REF!	0.721883	0.808813	0.168252	0.998898	1.31778	0.185779		#REF!	0.0253704	0.169564
6394	PC(18:1/20:5)		PC Ester	53494	DMS-MS	100009642							0.666383	0.887567	0.9649	0.5205	0.9407	0.5205	0.7984	0.5205	0.5205	0.5205	0.5205	1.0542	1.3515	0.5205	#REF!	#REF!	#REF!	#REF!	#REF!	#REF!	0.586435	0.586435	0.586435	1.18774	1.5227	0.586435		#REF!	0.320319	0.319902
6395	PC(18:1/22:1)		PC Ester	53302	DMS-MS	100009450							0.619617	0.579617	0.5519	0.5519	1.5102	0.5519	0.5519	0.5519	0.5519	0.5519	0.5519	0.5519	1.1341	0.5519	#REF!	#REF!	#REF!	#REF!	#REF!	#REF!	0.952181	0.952181	0.952181	0.952181	1.95664	0.952181		#REF!	0.927276	0.573959
6396	PC(18:1/22:2)		PC Ester	53495	DMS-MS	100009643							0.7743	0.811917	0.7743	0.7743	1.6924	0.7743	0.7743	0.7743	0.7743	0.7743	0.7743	0.7743	0.9656	0.7743	#REF!	#REF!	#REF!	#REF!	#REF!	#REF!	0.953669	0.953669	0.953669	0.953669	1.18928	0.953669		#REF!	0.353069	0.336779
6397	PC(18:1/22:4)		PC Ester	53834	DMS-MS	100009982							1.08305	1.16288	3.0044	1.7585	2.121	1	2.7045	0.8832	0.6987	0.8704	0.2115	1.4047	1.7072	0.2115	#REF!	#REF!	#REF!	#REF!	#REF!	#REF!	0.600834	0.748484	0.181876	1.20795	1.46808	0.181876		#REF!	0.0279964	0.169564
6398	PC(18:1/22:5)		PC Ester	53663	DMS-MS	100009811							0.889317	0.8114	1.5226	1.3093	1.2356	0.9405	1.44	0.6245	0.5122	0.703	0.2779	0.865	0.9649	0.2779	#REF!	#REF!	#REF!	#REF!	#REF!	#REF!	0.631255	0.866404	0.342494	1.06606	1.18918	0.342494		#REF!	0.0209583	0.159811
6399	PC(18:1/22:6)		PC Ester	53496	DMS-MS	100009644							0.981017	0.8134	1.9533	1.5649	1.5872	0.8627	2.0787	0.7352	0.5525	0.6346	0.1325	1.0514	1.5548	0.1325	#REF!	#REF!	#REF!	#REF!	#REF!	#REF!	0.679248	0.780182	0.162896	1.2926	1.91148	0.162896		#REF!	0.0976602	0.188919
6401	PC(18:2/16:1)		PC Ester	54173	DMS-MS	100010321							0.98165	0.75535	2.1548	0.9238	1.0232	0.8677	1.596	0.805	0.9166	0.6385	0.4901	1.0072	1.3858	0.4826	#REF!	#REF!	#REF!	#REF!	#REF!	#REF!	1.21348	0.845304	0.648838	1.33342	1.83465	0.638909		#REF!	0.584907	0.448819
6402	PC(18:2/18:2)		PC Ester	53304	DMS-MS	100009452							1.04523	0.737	1.6458	0.927	1.204	0.8629	1.2848	1.0362	0.7469	0.8539	0.6203	0.8667	1.1535	0.5798	#REF!	#REF!	#REF!	#REF!	#REF!	#REF!	1.01343	1.15862	0.841655	1.17598	1.56513	0.786703		#REF!	0.905014	0.569609
6403	PC(18:2/18:3)		PC Ester	53835	DMS-MS	100009983							1.05415	0.986267	1.232	1.0075	0.8052	1.0348	0.8938	1.0175	0.8256	1.1855	0.9071	0.8895	0.8849	0.9458	#REF!	#REF!	#REF!	#REF!	#REF!	#REF!	0.837096	1.20201	0.919731	0.901886	0.897222	0.95897		#REF!	0.942814	0.58031
6405	PC(18:2/20:1)		PC Ester	53305	DMS-MS	100009453							0.736183	0.837967	0.792	1.1559	1.9923	1	0.6834	0.3568	0.4375	0.5937	0.1966	1.1195	1.6478	0.4033	#REF!	#REF!	#REF!	#REF!	#REF!	#REF!	0.522097	0.708501	0.234616	1.33597	1.96643	0.481284		#REF!	0.268868	0.291842
6406	PC(18:2/20:2)		PC Ester	53836	DMS-MS	100009984							0.708283	0.600317	1.2988	1.0458	2.1147	1.0326	1.1281	0.4865	0.3354	0.4535	0.197	0.6529	1.2617	0.197	#REF!	#REF!	#REF!	#REF!	#REF!	#REF!	0.558705	0.755435	0.32816	1.08759	2.10172	0.32816		#REF!	0.0768286	0.17792
6407	PC(18:2/20:3)		PC Ester	53497	DMS-MS	100009645							0.93455	0.7393	1.1274	1.0556	1.2685	0.8733	0.9942	0.8345	0.6675	0.9045	0.5311	0.9827	1.2687	0.54	#REF!	#REF!	#REF!	#REF!	#REF!	#REF!	0.902881	1.22345	0.718382	1.32923	1.71608	0.730421		#REF!	0.973617	0.586335
6408	PC(18:2/20:4)		PC Ester	54533	DMS-MS	100010681							0.914733	0.7986	1.3013	1.086	1.3613	0.8441	1.3181	0.9976	0.6831	1.02	0.4318	0.9265	1.0522	0.4884	#REF!	#REF!	#REF!	#REF!	#REF!	#REF!	0.855372	1.27724	0.540696	1.16016	1.31756	0.61157		#REF!	0.108539	0.195583
6409	PC(18:2/20:5)		PC Ester	53665	DMS-MS	100009813							0.942133	0.977633	0.9987	1.0996	0.882	0.9566	1.0752	1.1149	0.8368	1.1313	0.6276	0.9144	0.8698	0.9527	#REF!	#REF!	#REF!	#REF!	#REF!	#REF!	0.855945	1.15718	0.641958	0.93532	0.8897	0.974496		#REF!	0.0583772	0.17396
6410	PC(18:2/22:1)		PC Ester	54534	DMS-MS	100010682							0.7068	0.720867	0.6877	0.6877	1.8445	0.6877	0.6877	0.6877	0.6877	0.6877	0.6877	0.6877	1.23	0.6877	#REF!	#REF!	#REF!	#REF!	#REF!	#REF!	0.953991	0.953991	0.953991	0.953991	1.70628	0.953991		#REF!	0.59663	0.454031
6411	PC(18:2/22:2)		PC Ester	54348	DMS-MS	100010496							0.6714	0.7298	0.6714	0.6714	0.6714	0.6714	0.6714	0.6714	0.6714	0.6714	0.6714	0.6714	1	0.6714	#REF!	#REF!	#REF!	#REF!	#REF!	#REF!	0.919978	0.919978	0.919978	0.919978	1.37024	0.919978		#REF!	0.949677	0.581619
6412	PC(18:2/22:4)		PC Ester	54535	DMS-MS	100010683							0.957817	0.983567	1.7952	1.1957	1.4831	1.0217	1.6593	0.9521	0.6157	1.2223	0.4602	1.1932	1.319	0.513	#REF!	#REF!	#REF!	#REF!	#REF!	#REF!	0.625987	1.24272	0.467889	1.21314	1.34104	0.521571		#REF!	0.0447499	0.17396
6413	PC(18:2/22:5)		PC Ester	53498	DMS-MS	100009646							0.9818	0.89005	1.2573	1.0504	1.0537	1.0584	1.3921	0.9843	0.6258	1.0197	0.5836	0.9828	0.9363	0.9945	#REF!	#REF!	#REF!	#REF!	#REF!	#REF!	0.703107	1.14567	0.655694	1.10421	1.05196	1.11735		#REF!	0.121952	0.206422
6414	PC(18:2/22:6)		PC Ester	54349	DMS-MS	100010497							1.01362	0.8606	1.3619	1.3366	1.3525	0.8458	1.3534	0.8768	0.6328	0.8541	0.4196	0.9367	1.201	0.6403	#REF!	#REF!	#REF!	#REF!	#REF!	#REF!	0.735301	0.992447	0.487567	1.08843	1.39554	0.744016		#REF!	0.142921	0.220012
6415	PC(20:0/14:1)		PC Ester	54350	DMS-MS	100010498							0.399283	0.411217	0.2863	0.2863	0.2863	0.2863	0.4963	0.2863	0.2863	0.2863	0.2863	0.2863	0.2863	0.2863	#REF!	#REF!	#REF!	#REF!	#REF!	#REF!	0.696227	0.696227	0.696227	0.696227	0.696227	0.696227		#REF!	0.270884	0.292416
6416	PC(20:0/16:1)		PC Ester	53837	DMS-MS	100009985							0.823767	0.78005	2.1843	1.1626	1.2069	0.4543	1.964	0.4543	0.7902	0.974	0.4543	1.062	1.1598	0.4543	#REF!	#REF!	#REF!	#REF!	#REF!	#REF!	1.01301	1.24864	0.582399	1.36145	1.48683	0.582399		#REF!	0.286172	0.300401
6417	PC(20:0/18:1)		PC Ester	53306	DMS-MS	100009454							0.868433	0.740783	1.2829	1.4081	1.4602	0.6825	1.3139	0.7536	0.595	1.0414	0.2816	1.3818	1.6782	0.4184	#REF!	#REF!	#REF!	#REF!	#REF!	#REF!	0.803204	1.40581	0.380138	1.86532	2.26544	0.564808		#REF!	0.759568	0.514838
6418	PC(20:0/18:2)		PC Ester	53307	DMS-MS	100009455							0.946417	0.763183	1.5794	0.9823	1.3386	0.82	1.1602	0.9279	0.6187	0.8234	0.5247	1.0013	1.6274	0.4728	#REF!	#REF!	#REF!	#REF!	#REF!	#REF!	0.810683	1.0789	0.687515	1.312	2.13238	0.61951		#REF!	0.733876	0.504268
6419	PC(20:0/18:3)		PC Ester	54536	DMS-MS	100010684							0.9676	0.9676	0.9676	0.9676	0.9676	0.9676	0.9676	0.9676	0.9676	0.9676	0.9676	0.9676	0.9676	0.9676	#REF!	#REF!	#REF!	#REF!	#REF!	#REF!	1	1	1	1	1	1		#REF!	NA	NA
6421	PC(20:0/20:1)		PC Ester	53499	DMS-MS	100009647							0.9922	0.9922	0.9922	0.9922	0.9922	0.9922	0.9922	0.9922	0.9922	0.9922	0.9922	0.9922	0.9922	0.9922	#REF!	#REF!	#REF!	#REF!	#REF!	#REF!	1	1	1	1	1	1		#REF!	NA	NA
6422	PC(20:0/20:2)		PC Ester	54174	DMS-MS	100010322							0.648517	0.6331	0.6331	0.6331	0.6331	0.6331	0.6331	0.6331	0.6331	0.6331	0.6331	0.6331	0.6402	0.6331	#REF!	#REF!	#REF!	#REF!	#REF!	#REF!	1	1	1	1	1.01121	1		#REF!	3.69287e-05	0.017002
6423	PC(20:0/20:3)		PC Ester	54175	DMS-MS	100010323							0.551733	0.658567	0.7656	0.9421	1.0459	0.3595	0.6711	0.3595	0.3595	0.3595	0.3595	0.8268	1.0315	0.3595	#REF!	#REF!	#REF!	#REF!	#REF!	#REF!	0.545882	0.545882	0.545882	1.25545	1.56628	0.545882		#REF!	0.171887	0.23401
6424	PC(20:0/20:4)		PC Ester	53308	DMS-MS	100009456							0.76925	0.8839	1.0813	1.2907	1.756	0.791	1.2453	0.7929	0.4908	0.9663	0.2383	0.9292	1	0.2383	#REF!	#REF!	#REF!	#REF!	#REF!	#REF!	0.555266	1.09322	0.269601	1.05125	1.13135	0.269601		#REF!	0.0125471	0.125969
6427	PC(20:0/22:4)		PC Ester	54177	DMS-MS	100010325							0.55665	0.4276	1.1005	1.0267	1.0973	0.4276	1.2842	0.4276	0.4276	0.4276	0.4276	1.0044	0.8364	0.4276	#REF!	#REF!	#REF!	#REF!	#REF!	#REF!	1	1	1	2.34892	1.95603	1		#REF!	0.560557	0.438539
6428	PC(20:0/22:5)		PC Ester	54178	DMS-MS	100010326							0.539167	0.485	0.485	0.485	0.485	0.485	0.485	0.485	0.485	0.485	0.485	0.485	0.485	0.485	#REF!	#REF!	#REF!	#REF!	#REF!	#REF!	1	1	1	1	1	1		#REF!	NA	NA
6429	PC(20:0/22:6)		PC Ester	54351	DMS-MS	100010499							0.797017	0.796617	0.9931	1.0655	1.1553	0.5934	0.7766	0.5934	0.5934	0.5934	0.5934	0.6906	0.824	0.5934	#REF!	#REF!	#REF!	#REF!	#REF!	#REF!	0.7449	0.7449	0.7449	0.866916	1.03437	0.7449		#REF!	0.08737	0.181453
6542	PE(14:0/18:1)	Phosphatidylethanolamine	PE Ester	54538	DMS-MS	100010686							0.8072	0.630017	1.013	1.4206	0.5169	0.5169	0.8667	0.5169	0.5169	0.5169	0.5169	1.3042	0.6106	0.5169	#REF!	#REF!	#REF!	#REF!	#REF!	#REF!	0.820454	0.820454	0.820454	2.0701	0.969181	0.820454		#REF!	0.854885	0.549241
6543	PE(14:0/18:2)		PE Ester	54005	DMS-MS	100010153							0.2417	0.2417	0.2417	0.2417	0.2417	0.2417	0.2417	0.2417	0.2417	0.2417	0.2417	0.2417	0.2417	0.2417	#REF!	#REF!	#REF!	#REF!	#REF!	#REF!	1	1	1	1	1	1		#REF!	NA	NA
6548	PE(14:0/20:3)		PE Ester	54353	DMS-MS	100010501							1	1	1	1	1	1	1	1	1	1	1	1	1	1	#REF!	#REF!	#REF!	#REF!	#REF!	#REF!	1	1	1	1	1	1		#REF!	NA	NA
6549	PE(14:0/20:4)		PE Ester	54180	DMS-MS	100010328							0.3063	0.3063	0.3063	0.3063	0.3063	0.3063	0.3063	0.3063	0.3063	0.3063	0.3063	0.3063	0.3063	0.3063	#REF!	#REF!	#REF!	#REF!	#REF!	#REF!	1	1	1	1	1	1		#REF!	NA	NA
6553	PE(14:0/22:4)		PE Ester	53310	DMS-MS	100009458							0.7064	0.780733	1.7077	0.7064	0.7064	0.7064	1.6664	0.7064	0.7064	0.7064	0.7064	0.7064	0.9469	0.7064	#REF!	#REF!	#REF!	#REF!	#REF!	#REF!	0.90479	0.90479	0.90479	0.90479	1.21283	0.90479		#REF!	0.145619	0.22215
6563	PE(15:0/18:1)		PE Ester	53669	DMS-MS	100009817							1	1	1	1	1	1	1	1	1	1	1	1	1	1	#REF!	#REF!	#REF!	#REF!	#REF!	#REF!	1	1	1	1	1	1		#REF!	NA	NA
6575	PE(15:0/22:6)		PE Ester	54357	DMS-MS	100010505							0.3368	0.3368	0.3368	0.3368	0.3368	0.3368	0.3368	0.3368	0.3368	0.3368	0.3368	0.3368	0.3368	0.3368	#REF!	#REF!	#REF!	#REF!	#REF!	#REF!	1	1	1	1	1	1		#REF!	NA	NA
6576	PE(16:0/14:0)		PE Ester	53844	DMS-MS	100009992							0.749167	0.5136	1.2087	1	0.3777	0.3777	0.9347	0.3777	0.3777	0.3777	0.3777	0.3777	0.3777	0.3777	#REF!	#REF!	#REF!	#REF!	#REF!	#REF!	0.735397	0.735397	0.735397	0.735397	0.735397	0.735397		#REF!	0.342418	0.331893
6579	PE(16:0/16:0)		PE Ester	54006	DMS-MS	100010154							0.818033	1.07415	2.2042	1.0649	1.2684	0.9255	2.1353	1.3443	0.998	0.6225	0.2048	1.402	1.1337	0.3272	#REF!	#REF!	#REF!	#REF!	#REF!	#REF!	0.929107	0.579528	0.190662	1.30522	1.05544	0.304613		#REF!	0.00904008	0.115302
6580	PE(16:0/16:1)		PE Ester	53672	DMS-MS	100009820							0.6863	1.42892	2.4416	0.9222	0.7654	0.5735	2.2588	1	2.3668	1.2298	1.902	1.384	1.6082	0.8701	#REF!	#REF!	#REF!	#REF!	#REF!	#REF!	1.65636	0.860652	1.33108	0.968566	1.12547	0.608923		#REF!	0.146004	0.22215
6581	PE(16:0/17:0)		PE Ester	54182	DMS-MS	100010330							0.9611	0.974067	0.9611	0.9611	0.9611	0.9611	0.9611	0.9611	0.9611	0.9611	0.9611	0.9611	0.9611	0.9611	#REF!	#REF!	#REF!	#REF!	#REF!	#REF!	0.986688	0.986688	0.986688	0.986688	0.986688	0.986688		#REF!	NA	NA
6583	PE(16:0/18:1)		PE Ester	54007	DMS-MS	100010155							0.741733	0.892033	1.5905	1.4247	1.1024	0.7883	1.6145	0.782	0.7128	1.1498	0.4417	1.6556	1.6524	0.4837	#REF!	#REF!	#REF!	#REF!	#REF!	#REF!	0.799073	1.28897	0.495161	1.85598	1.8524	0.542244		#REF!	0.159517	0.228079
6584	PE(16:0/18:2)		PE Ester	53502	DMS-MS	100009650							0.793517	1.0328	1.5089	0.9129	0.6884	0.8524	1.0879	0.7241	1.2174	1.576	1.5962	0.9324	0.7461	1.2378	#REF!	#REF!	#REF!	#REF!	#REF!	#REF!	1.17874	1.52595	1.54551	0.902789	0.722405	1.19849		#REF!	0.872604	0.556737
6585	PE(16:0/18:3)		PE Ester	54183	DMS-MS	100010331							0.287617	0.389683	0.9622	0.2666	0.2666	0.2666	0.7321	0.2666	0.2666	1.391	1	0.5819	0.561	0.2666	#REF!	#REF!	#REF!	#REF!	#REF!	#REF!	0.684145	3.56957	2.56619	1.49326	1.43963	0.684145		#REF!	0.830726	0.540103
6587	PE(16:0/20:1)		PE Ester	54185	DMS-MS	100010333							0.8656	1.01427	0.942	1.1341	1.182	0.9229	0.9996	0.7428	0.7931	0.7455	0.5359	1.9052	1.4683	0.3238	#REF!	#REF!	#REF!	#REF!	#REF!	#REF!	0.781944	0.735014	0.528362	1.8784	1.44765	0.319245		#REF!	0.477505	0.394338
6588	PE(16:0/20:2)		PE Ester	53315	DMS-MS	100009463							0.838217	0.630267	1.3328	1.6101	1.6821	0.8167	1.4722	0.5114	0.4373	0.5481	0.1924	1.3057	1.3713	0.1597	#REF!	#REF!	#REF!	#REF!	#REF!	#REF!	0.693833	0.869632	0.305268	2.07166	2.17575	0.253385		#REF!	0.347576	0.334079
6589	PE(16:0/20:3)		PE Ester	54543	DMS-MS	100010691							0.742867	0.98065	1.5851	1.2262	1.1307	0.7576	1.49	0.629	0.554	0.8499	0.4479	1.2101	1.3784	0.377	#REF!	#REF!	#REF!	#REF!	#REF!	#REF!	0.564931	0.86667	0.456738	1.23398	1.4056	0.384439		#REF!	0.0270171	0.169564
6590	PE(16:0/20:4)		PE Ester	54544	DMS-MS	100010692							0.756633	1.11967	1.5245	1.3635	1.0013	0.8113	1.3093	0.7628	0.6523	1.0019	0.3861	1.085	0.9987	0.3008	#REF!	#REF!	#REF!	#REF!	#REF!	#REF!	0.582584	0.89482	0.344835	0.969038	0.891962	0.268651		#REF!	0.00319061	0.0792031
6591	PE(16:0/20:5)		PE Ester	54008	DMS-MS	100010156							0.1954	0.251533	0.1954	0.1954	0.1954	0.1954	0.1954	0.1954	0.1954	0.1954	0.1954	0.1954	0.1954	0.1954	#REF!	#REF!	#REF!	#REF!	#REF!	#REF!	0.776835	0.776835	0.776835	0.776835	0.776835	0.776835		#REF!	NA	NA
6592	PE(16:0/22:1)		PE Ester	53316	DMS-MS	100009464							0.9513	0.9513	0.9513	0.9513	0.9513	0.9513	0.9513	0.9513	0.9513	0.9513	0.9513	0.9513	0.9513	0.9513	#REF!	#REF!	#REF!	#REF!	#REF!	#REF!	1	1	1	1	1	1		#REF!	NA	NA
6593	PE(16:0/22:2)		PE Ester	54186	DMS-MS	100010334							0.56145	0.573717	1.1136	0.4977	0.4977	0.4977	0.4977	0.4977	0.4977	0.4977	0.4977	0.4977	0.8945	0.4977	#REF!	#REF!	#REF!	#REF!	#REF!	#REF!	0.867501	0.867501	0.867501	0.867501	1.55913	0.867501		#REF!	0.69891	0.494259
6594	PE(16:0/22:4)		PE Ester	54358	DMS-MS	100010506							0.97175	1.17188	3.7359	1.7259	1.8583	1.0071	3.6037	0.8182	0.6794	1.1047	0.0996	2.0201	1.7398	0.1496	#REF!	#REF!	#REF!	#REF!	#REF!	#REF!	0.579751	0.942671	0.0849914	1.72381	1.48462	0.127658		#REF!	0.0544582	0.17396
6595	PE(16:0/22:5)		PE Ester	54359	DMS-MS	100010507							0.6826	1.05943	1.3563	1.2965	1.1461	0.8132	1.3699	0.6373	0.5181	1.0277	0.19	1.6519	1.0407	0.141	#REF!	#REF!	#REF!	#REF!	#REF!	#REF!	0.489035	0.970047	0.179341	1.55923	0.982318	0.13309		#REF!	0.0121613	0.125969
6596	PE(16:0/22:6)		PE Ester	53845	DMS-MS	100009993							0.76265	1.1012	1.7146	1.8581	1.1474	1.0559	1.5197	0.6491	0.5294	0.9087	0.2181	1.1789	0.9879	0.1174	#REF!	#REF!	#REF!	#REF!	#REF!	#REF!	0.480748	0.825191	0.198057	1.07056	0.897112	0.106611		#REF!	0.00386558	0.0827772
6604	PE(17:0/18:1)		PE Ester	53317	DMS-MS	100009465							0.809033	0.77445	1.7136	0.9645	1.2811	1.1146	1.8145	0.2663	1.2249	0.8349	0.2663	1.1332	1.0966	0.2663	#REF!	#REF!	#REF!	#REF!	#REF!	#REF!	1.58164	1.07806	0.343857	1.46323	1.41597	0.343857		#REF!	0.261142	0.286454
6605	PE(17:0/18:2)		PE Ester	54009	DMS-MS	100010157							1.00758	0.571817	1.8225	0.8548	0.2709	1.1277	1.2117	1.1448	0.9631	0.8777	0.2709	0.9052	0.4224	0.2709	#REF!	#REF!	#REF!	#REF!	#REF!	#REF!	1.68428	1.53493	0.473753	1.58302	0.738698	0.473753		#REF!	0.956751	0.581619
6608	PE(17:0/20:2)		PE Ester	54545	DMS-MS	100010693							1	1	1	1	1	1	1	1	1	1	1	1	1	1	#REF!	#REF!	#REF!	#REF!	#REF!	#REF!	1	1	1	1	1	1		#REF!	NA	NA
6609	PE(17:0/20:3)		PE Ester	53673	DMS-MS	100009821							0.4531	0.525517	0.9621	0.4531	0.4531	0.4531	0.4531	0.4531	0.4531	0.4531	0.4531	0.4531	0.4531	0.4531	#REF!	#REF!	#REF!	#REF!	#REF!	#REF!	0.862199	0.862199	0.862199	0.862199	0.862199	0.862199		#REF!	0.14308	0.220012
6610	PE(17:0/20:4)		PE Ester	53503	DMS-MS	100009651							0.88725	0.96815	1.9183	1.7711	0.9283	1.065	1.5901	0.776	1.0448	0.8101	0.3386	0.7901	0.7637	0.3386	#REF!	#REF!	#REF!	#REF!	#REF!	#REF!	1.07917	0.836751	0.349739	0.816093	0.788824	0.349739		#REF!	0.0127463	0.126202
6614	PE(17:0/22:4)		PE Ester	54010	DMS-MS	100010158							0.704017	0.78995	2.6317	1.0779	1.1621	0.7967	2.4335	1.2047	0.4936	0.4936	0.4936	0.4936	0.6667	0.4936	#REF!	#REF!	#REF!	#REF!	#REF!	#REF!	0.62485	0.62485	0.62485	0.62485	0.843977	0.62485		#REF!	0.0185487	0.151972
6615	PE(17:0/22:5)		PE Ester	53505	DMS-MS	100009653							0.57815	0.5893	1.2118	0.4659	0.4659	0.4659	1.4402	0.4659	0.4659	0.4659	0.4659	0.4659	0.4659	0.4659	#REF!	#REF!	#REF!	#REF!	#REF!	#REF!	0.790599	0.790599	0.790599	0.790599	0.790599	0.790599		#REF!	0.168611	0.233234
6616	PE(17:0/22:6)		PE Ester	54189	DMS-MS	100010337							0.9969	0.7788	2.1703	1.7622	1.1649	1.3358	1.8261	0.7201	0.2687	0.534	0.2687	0.7751	0.776	0.2687	#REF!	#REF!	#REF!	#REF!	#REF!	#REF!	0.345018	0.68567	0.345018	0.995249	0.996405	0.345018		#REF!	0.00753191	0.105082
6617	PE(18:0/14:0)		PE Ester	54546	DMS-MS	100010694							0.5828	0.59555	0.9696	0.5828	0.5828	0.5828	0.5828	0.5828	0.5828	0.5828	0.5828	0.5828	0.5828	0.5828	#REF!	#REF!	#REF!	#REF!	#REF!	#REF!	0.978591	0.978591	0.978591	0.978591	0.978591	0.978591		#REF!	0.286194	0.300401
6619	PE(18:0/15:0)		PE Ester	53506	DMS-MS	100009654							1	1	1	1	1	1	1	1	1	1	1	1	1	1	#REF!	#REF!	#REF!	#REF!	#REF!	#REF!	1	1	1	1	1	1		#REF!	NA	NA
6620	PE(18:0/16:0)		PE Ester	53507	DMS-MS	100009655							0.780183	0.930533	1.614	1.1035	1.0452	0.6862	1.353	1.0919	0.7212	0.7547	0.4264	1.1659	1.2077	0.4556	#REF!	#REF!	#REF!	#REF!	#REF!	#REF!	0.775039	0.81104	0.458232	1.25294	1.29786	0.489612		#REF!	0.0177582	0.149492
6621	PE(18:0/16:1)		PE Ester	54191	DMS-MS	100010339							0.85105	0.9834	2.431	1.0414	0.7598	0.7035	2.0278	0.897	1.0573	1.2267	1.3061	1.1298	1.7406	0.7191	#REF!	#REF!	#REF!	#REF!	#REF!	#REF!	1.07515	1.24741	1.32815	1.14887	1.76998	0.731239		#REF!	0.423693	0.36736
6622	PE(18:0/17:0)		PE Ester	53508	DMS-MS	100009656							0.6904	0.679133	0.6705	0.6705	0.6705	0.6705	1.4857	0.6705	0.6705	0.6705	0.6705	0.6705	0.6705	0.6705	#REF!	#REF!	#REF!	#REF!	#REF!	#REF!	0.987288	0.987288	0.987288	0.987288	0.987288	0.987288		#REF!	0.400672	0.358193
6623	PE(18:0/18:0)		PE Ester	54547	DMS-MS	100010695							0.997017	1.01645	1.7218	1.8869	1.3492	0.8935	1.5095	0.7075	0.5033	1.0979	0.2436	1.2418	1.3138	0.1736	#REF!	#REF!	#REF!	#REF!	#REF!	#REF!	0.495155	1.08013	0.239658	1.2217	1.29254	0.17079		#REF!	0.0590249	0.174063
6624	PE(18:0/18:1)		PE Ester	54548	DMS-MS	100010696							1.06578	0.8955	1.8986	1.6612	1.946	1.0084	1.9797	0.634	0.4773	1.232	0.3192	1.5051	1.8138	0.3085	#REF!	#REF!	#REF!	#REF!	#REF!	#REF!	0.532998	1.37577	0.356449	1.68074	2.02546	0.3445		#REF!	0.337589	0.330397
6625	PE(18:0/18:2)		PE Ester	54011	DMS-MS	100010159							1.11832	0.796083	2.1469	1.0118	1.0568	0.9361	1.5708	0.5918	0.5313	1.0001	0.9252	0.7563	0.9477	0.7524	#REF!	#REF!	#REF!	#REF!	#REF!	#REF!	0.667392	1.25628	1.16219	0.950026	1.19045	0.945127		#REF!	0.78871	0.525608
6626	PE(18:0/18:3)		PE Ester	53847	DMS-MS	100009995							0.719783	0.889817	2.0341	0.9732	1.0267	0.2381	1.3059	0.8062	0.6365	1.5902	1.2939	1.2712	1.5592	0.8318	#REF!	#REF!	#REF!	#REF!	#REF!	#REF!	0.715316	1.78711	1.45412	1.42861	1.75227	0.934799		#REF!	0.736222	0.505035
6627	PE(18:0/18:4)		PE Ester	54362	DMS-MS	100010510							0.8011	0.89215	0.9659	0.8011	0.8011	0.8011	0.8011	0.8011	0.8011	0.8011	0.8011	0.8011	0.8011	0.8011	#REF!	#REF!	#REF!	#REF!	#REF!	#REF!	0.897943	0.897943	0.897943	0.897943	0.897943	0.897943		#REF!	0.0105663	0.119665
6628	PE(18:0/20:1)		PE Ester	54363	DMS-MS	100010511							0.8426	0.673583	0.7134	1.1732	1.6882	0.7589	0.6595	0.3851	0.5604	0.7538	0.257	1.243	1.4774	0.3186	#REF!	#REF!	#REF!	#REF!	#REF!	#REF!	0.831968	1.11909	0.381542	1.84535	2.19334	0.472993		#REF!	0.842286	0.543883
6629	PE(18:0/20:2)		PE Ester	54012	DMS-MS	100010160							0.853683	0.59785	0.9738	1.3061	1.9566	0.7434	1.0896	0.4148	0.4281	0.5283	0.1779	1.0082	1.5897	0.1602	#REF!	#REF!	#REF!	#REF!	#REF!	#REF!	0.716066	0.883666	0.297566	1.68638	2.65903	0.26796		#REF!	0.700517	0.494259
6630	PE(18:0/20:3)		PE Ester	54549	DMS-MS	100010697							0.849533	0.78475	1.5953	1.3269	1.6039	0.726	1.5036	0.4629	0.3851	0.7209	0.2143	1.0535	1.3596	0.1897	#REF!	#REF!	#REF!	#REF!	#REF!	#REF!	0.49073	0.918637	0.273081	1.34247	1.73253	0.241733		#REF!	0.119359	0.20353
6631	PE(18:0/20:4)		PE Ester	54013	DMS-MS	100010161							0.92585	0.898133	1.7086	1.4632	1.4431	0.7985	1.5917	0.6563	0.4627	0.9563	0.3308	1.0753	1.0968	0.1786	#REF!	#REF!	#REF!	#REF!	#REF!	#REF!	0.51518	1.06476	0.368319	1.19726	1.2212	0.198857		#REF!	0.0434857	0.17396
6632	PE(18:0/20:5)		PE Ester	54192	DMS-MS	100010340							0.810267	0.9281	1.7523	0.8859	0.6742	0.6297	1.4822	0.5511	0.1561	1.0015	0.4253	1.2763	1.3597	0.1561	#REF!	#REF!	#REF!	#REF!	#REF!	#REF!	0.168193	1.07909	0.458248	1.37518	1.46504	0.168193		#REF!	0.234108	0.272181
6634	PE(18:0/22:2)		PE Ester	54014	DMS-MS	100010162							0.95645	0.792633	1.2014	0.7834	1.1536	1.0251	1.0838	0.7028	0.4265	1.0038	0.4265	0.8835	0.7734	0.4265	#REF!	#REF!	#REF!	#REF!	#REF!	#REF!	0.53808	1.26641	0.53808	1.11464	0.975735	0.53808		#REF!	0.2287	0.270234
6635	PE(18:0/22:4)		PE Ester	53674	DMS-MS	100009822							1.0589	1.01253	3.152	1.5997	2.2783	1.0016	3.2764	0.7207	0.4603	0.9364	0.095	1.3052	1.2352	0.0936	#REF!	#REF!	#REF!	#REF!	#REF!	#REF!	0.454602	0.924809	0.0938241	1.28904	1.21991	0.0924414		#REF!	0.0341483	0.173484
6636	PE(18:0/22:5)		PE Ester	53319	DMS-MS	100009467							0.92015	0.882033	1.6698	1.2916	1.5003	0.863	1.8348	0.6843	0.3744	0.934	0.1419	1.3232	0.9571	0.1175	#REF!	#REF!	#REF!	#REF!	#REF!	#REF!	0.424474	1.05892	0.160878	1.50017	1.08511	0.133215		#REF!	0.0476556	0.17396
6637	PE(18:0/22:6)		PE Ester	54193	DMS-MS	100010341							0.9735	0.804067	2.3079	1.5118	1.4632	0.8038	2.1309	0.5829	0.3685	0.6187	0.1424	1.0417	1.1529	0.1027	#REF!	#REF!	#REF!	#REF!	#REF!	#REF!	0.458295	0.769464	0.1771	1.29554	1.43384	0.127726		#REF!	0.0570762	0.17396
6638	PE(18:1/14:1)		PE Ester	53320	DMS-MS	100009468							0.577533	0.630983	0.3783	0.8471	0.3783	0.3783	0.3783	0.3783	0.3783	1.2611	0.3783	1.0522	0.7605	0.3783	#REF!	#REF!	#REF!	#REF!	#REF!	#REF!	0.59954	1.99863	0.59954	1.66756	1.20526	0.59954		#REF!	0.29383	0.304341
6639	PE(18:1/16:1)		PE Ester	54550	DMS-MS	100010698							1.01405	0.97355	0.8266	1.223	0.9377	0.8266	0.8156	0.5197	1.3893	1.3183	1.4005	1.4722	1.5806	0.8745	#REF!	#REF!	#REF!	#REF!	#REF!	#REF!	1.42705	1.35412	1.43855	1.5122	1.62354	0.898259		#REF!	0.00326603	0.0792031
6640	PE(18:1/18:1)		PE Ester	53321	DMS-MS	100009469							0.898633	0.972083	1.2086	1.2543	0.8204	0.8364	1.0477	0.6485	1.145	1.0836	0.7803	1.5214	1.6059	0.9432	#REF!	#REF!	#REF!	#REF!	#REF!	#REF!	1.17788	1.11472	0.802709	1.56509	1.65202	0.970287		#REF!	0.456795	0.382519
6641	PE(18:1/18:2)		PE Ester	54551	DMS-MS	100010699							1.0188	1.01703	1.3155	0.765	0.5172	0.7992	0.8689	0.601	1.8711	1.9789	2.0358	1.0686	0.751	1.819	#REF!	#REF!	#REF!	#REF!	#REF!	#REF!	1.83976	1.94576	2.0017	1.0507	0.738422	1.78854		#REF!	0.0151183	0.139209
6642	PE(18:1/18:3)		PE Ester	54194	DMS-MS	100010342							0.3332	0.784883	1	0.3332	0.3332	0.3332	0.7093	0.946	1.3763	2.0281	1.8707	1.1619	0.9015	0.3332	#REF!	#REF!	#REF!	#REF!	#REF!	#REF!	1.75351	2.58395	2.38341	1.48035	1.14858	0.424522		#REF!	0.703616	0.494259
6644	PE(18:1/20:1)		PE Ester	53322	DMS-MS	100009470							0.8829	0.707367	0.4551	1.6278	1.3061	0.7818	0.4835	0.3828	0.8288	0.7145	0.5597	1.9514	2.0839	0.5779	#REF!	#REF!	#REF!	#REF!	#REF!	#REF!	1.17167	1.01008	0.791245	2.75868	2.946	0.816974		#REF!	0.216334	0.262106
6645	PE(18:1/20:2)		PE Ester	54552	DMS-MS	100010700							0.817333	0.595467	1.0303	1.2322	1.507	0.8458	1	0.4975	0.6857	0.3927	0.3074	1.1878	1.7729	0.3051	#REF!	#REF!	#REF!	#REF!	#REF!	#REF!	1.15153	0.659483	0.516234	1.99474	2.97733	0.512371		#REF!	0.903661	0.569256
6646	PE(18:1/20:3)		PE Ester	54195	DMS-MS	100010343							0.824333	0.914483	1.1565	1.2298	0.9918	0.7015	0.986	0.614	0.7854	1.0581	0.6406	1.2248	1.3989	0.5385	#REF!	#REF!	#REF!	#REF!	#REF!	#REF!	0.858846	1.15705	0.700505	1.33934	1.52972	0.588857		#REF!	0.553835	0.436246
6647	PE(18:1/20:4)		PE Ester	54364	DMS-MS	100010512							0.926717	1.02027	1.2514	1.1951	0.8797	0.7822	1.0144	0.7683	1.003	1.2466	0.6719	1.1429	1.1048	0.5948	#REF!	#REF!	#REF!	#REF!	#REF!	#REF!	0.983076	1.22184	0.658553	1.1202	1.08285	0.582985		#REF!	0.421053	0.366452
6648	PE(18:1/20:5)		PE Ester	53675	DMS-MS	100009823							0.5864	0.75495	0.9594	0.5349	0.5349	0.5349	0.5349	0.5349	0.5349	0.5349	0.5349	0.5349	1	0.5349	#REF!	#REF!	#REF!	#REF!	#REF!	#REF!	0.708524	0.708524	0.708524	0.708524	1.32459	0.708524		#REF!	0.192837	0.247304
6649	PE(18:1/22:0)		PE Ester	55177	DMS-MS	100013437							1.05217	0.7717	0.7948	0.9123	1.3582	0.9764	0.8933	1.1435	0.9275	1.1637	0.8776	1.282	1.4374	1.4188	#REF!	#REF!	#REF!	#REF!	#REF!	#REF!	1.20189	1.50797	1.13723	1.66127	1.86264	1.83854		#REF!	0.00469813	0.0920434
6650	PE(18:1/22:1)		PE Ester	54365	DMS-MS	100010513							0.684167	0.542883	0.5369	1.2038	1.456	0.4101	0.6527	0.4101	0.4101	0.4101	0.4101	1.2139	1.3835	0.4101	#REF!	#REF!	#REF!	#REF!	#REF!	#REF!	0.755411	0.755411	0.755411	2.23602	2.54843	0.755411		#REF!	0.716624	0.499143
6651	PE(18:1/22:2)		PE Ester	54553	DMS-MS	100010701							0.607667	0.613	0.471	0.471	0.9441	0.471	0.5622	0.7561	0.471	0.471	0.471	0.471	1.218	0.471	0.229348	0.229348	0.459718	0.229348	0.273756	0.368174	0.768352	0.768352	0.768352	0.768352	1.98695	0.768352		0.307048	0.883365	0.560581
6652	PE(18:1/22:4)		PE Ester	53323	DMS-MS	100009471							0.955517	1.0945	3.1026	1.4372	1.4051	0.9621	2.8568	0.9868	0.8887	0.9383	0.1272	1.56	1.9134	0.2264	2.02612	0.938549	0.917586	0.62829	1.8656	0.64442	0.811969	0.857286	0.116217	1.42531	1.7482	0.206852		1.35904	0.0662051	0.175205
6653	PE(18:1/22:5)		PE Ester	53324	DMS-MS	100009472							0.833933	1.11163	1.4946	1.233	0.9055	0.8803	1.3881	0.7706	0.7885	1.0164	0.2439	1.6335	1.2787	0.2862	0.851002	0.702051	0.515577	0.501229	0.790362	0.438767	0.709317	0.91433	0.219407	1.46946	1.15029	0.257459		0.804826	0.0558149	0.17396
6654	PE(18:1/22:6)		PE Ester	53509	DMS-MS	100009657							0.853933	1.0095	1.7995	1.4618	0.9458	0.8574	1.5666	0.6217	0.7159	0.8583	0.2861	1.1618	1.3495	0.3429	1.2908	1.04856	0.678431	0.61502	1.12374	0.445951	0.709163	0.850223	0.283408	1.15087	1.3368	0.339673		1.11399	0.048559	0.17396
6655	PE(18:2/14:1)		PE Ester	54016	DMS-MS	100010164							0.6698	0.673467	0.6698	0.6698	0.6698	0.6698	0.6698	0.6698	0.6698	0.6698	0.6698	0.6698	0.6698	0.6698	1.10328	1.10328	1.10328	1.10328	1.10328	1.10328	0.994556	0.994556	0.994556	0.994556	0.994556	0.994556		1.10932	NA	NA
6656	PE(18:2/16:1)		PE Ester	53510	DMS-MS	100009658							1.07242	1.29923	0.7309	0.8078	0.8616	0.7795	0.6422	0.6794	2.6608	2.3834	3.2952	1.2572	0.947	1.4904	0.328684	0.363266	0.387459	0.350539	0.288796	0.305525	2.04798	1.83447	2.53626	0.967648	0.728891	1.14714		0.218547	0.032085	0.171135
6657	PE(18:2/18:2)		PE Ester	53325	DMS-MS	100009473							1.30643	0.848033	1.5715	0.8662	0.6403	0.8104	0.92	0.9085	1.3308	2.4356	1.4429	0.8459	0.6454	1.454	1.16161	0.64027	0.473291	0.599024	0.680037	0.671537	1.56928	2.87206	1.70147	0.997484	0.761055	1.71456		0.439456	0.0324425	0.171135
6658	PE(18:2/18:3)		PE Ester	54554	DMS-MS	100010702							0.7561	0.7561	0.7561	0.7561	0.7561	0.7561	0.7561	0.7561	0.7561	0.7561	0.7561	0.7561	0.7561	0.7561	0.833658	0.833658	0.833658	0.833658	0.833658	0.833658	1	1	1	1	1	1		0.833658	NA	NA
6660	PE(18:2/20:1)		PE Ester	54196	DMS-MS	100010344							0.793917	0.713983	0.691	1.0311	1.1322	0.7888	0.588	0.5201	1.1224	0.7945	0.3931	0.6975	1.1783	0.3931	0.439689	0.656097	0.720428	0.50192	0.374149	0.330944	1.57203	1.11277	0.550573	0.976914	1.65032	0.550573		0.471409	0.765352	0.517048
6661	PE(18:2/20:2)		PE Ester	54197	DMS-MS	100010345							0.8803	0.554983	1.5559	1.3182	1.5325	0.576	1.1214	0.5701	0.1996	0.6165	0.1996	0.6449	1.3137	0.1996	10.2227	8.66097	10.069	3.78449	7.36794	3.74573	0.35965	1.11084	0.35965	1.16202	2.3671	0.35965		7.66769	0.440203	0.37462
6662	PE(18:2/20:3)		PE Ester	54017	DMS-MS	100010165							0.789233	0.54695	1.2292	0.9494	1.3536	0.5847	0.9928	0.6764	0.294	0.7499	0.294	1.0549	1.2107	0.294	0.706099	0.545371	0.777559	0.335874	0.570302	0.38855	0.537526	1.37106	0.537526	1.9287	2.21355	0.537526		0.466434	0.924183	0.573829
6663	PE(18:2/20:4)		PE Ester	54555	DMS-MS	100010703							1.0324	0.833083	1.4927	1.1817	1.1544	0.7994	0.952	0.9237	0.6203	1.13	0.408	0.7734	0.8245	0.4422	5.50507	4.3581	4.25742	2.94818	3.51097	3.4066	0.744583	1.35641	0.489747	0.928359	0.989697	0.530799		4.75958	0.232724	0.271119
6665	PE(18:2/22:1)		PE Ester	54556	DMS-MS	100010704							0.846833	0.8162	0.8162	0.8162	0.8162	0.8162	0.8162	0.8162	0.8162	0.8162	0.8162	0.8162	0.8162	0.8162	0.459891	0.459891	0.459891	0.459891	0.459891	0.459891	1	1	1	1	1	1		0.459891	NA	NA
6667	PE(18:2/22:4)		PE Ester	53327	DMS-MS	100009475							1.03247	0.773317	3.2265	1.4349	1.661	0.9787	2.5365	1.1172	0.4324	0.7173	0.2322	0.9089	1.5208	0.2322	2.24281	0.997428	1.15459	0.680314	1.76317	0.776588	0.55915	0.927563	0.300265	1.17533	1.96659	0.300265		1.45624	0.0682653	0.175205
6668	PE(18:2/22:5)		PE Ester	53848	DMS-MS	100009996							0.8582	0.668133	1.647	1.0176	1.0117	1.1285	1.3228	0.8284	0.345	0.8368	0.345	0.9558	0.8255	0.345	1.30493	0.806254	0.801579	0.894121	1.04807	0.656349	0.516364	1.25244	0.516364	1.43055	1.23553	0.516364		1.00799	0.0816985	0.180575
6669	PE(18:2/22:6)		PE Ester	53677	DMS-MS	100009825							1.2253	0.724767	1.9195	1.5734	1.0914	0.7295	1.3961	0.7106	0.5476	0.6762	0.2363	1.0845	1	0.2363	0.939205	0.769859	0.534018	0.356942	0.683107	0.347694	0.755554	0.93299	0.326036	1.49634	1.37975	0.326036		0.695999	0.603482	0.456963
6672	PE(O-16:0/16:0)		PE Ether	53849	DMS-MS	100009997							1.31528	0.844267	1.19	0.7467	1.4225	0.9149	1.0344	0.5373	1.0837	0.6017	0.3021	1.4311	2.4714	0.3021	0.565719	0.354977	0.676249	0.434938	0.491748	0.255429	1.2836	0.71269	0.357825	1.69508	2.92727	0.357825		0.378913	0.293398	0.304235
6673	PE(O-16:0/16:1)		PE Ether	54557	DMS-MS	100010705							0.843267	0.556767	1	0.4008	0.4008	0.4008	0.4008	0.4008	0.4008	0.4008	0.4008	1.3043	0.6645	0.4008	0.173522	0.0695477	0.0695477	0.0695477	0.0695477	0.0695477	0.719871	0.719871	0.719871	2.34263	1.1935	0.719871		0.0812488	0.147202	0.22217
6674	PE(O-16:0/18:0)		PE Ether	54558	DMS-MS	100010706							0.9727	0.683017	1.0912	1.1041	1.2055	1.1622	0.7825	0.3007	0.3007	0.3007	0.3007	1.2285	0.8358	0.3007	0.156688	0.15854	0.1731	0.166883	0.112361	0.0431782	0.440253	0.440253	0.440253	1.79864	1.22369	0.440253		0.169495	0.557852	0.437629
6675	PE(O-16:0/18:1)		PE Ether	54366	DMS-MS	100010514							1.6438	0.8962	0.9325	1.0218	1.8006	1.035	0.7426	0.3549	0.6378	1.177	0.2918	1.4792	1.8678	0.4334	1.83082	2.00615	3.53521	2.03207	1.45798	0.696793	0.711672	1.31332	0.325597	1.65052	2.08413	0.483597		1.75967	0.153376	0.224172
6676	PE(O-16:0/18:2)		PE Ether	53850	DMS-MS	100009998							2.20977	1.13643	1.0755	0.8724	2.4647	1.7251	0.602	0.4262	0.7955	0.5604	0.3169	1.1424	1.9391	0.5022	1.22527	0.993886	2.80792	1.96533	0.685831	0.48555	0.699997	0.493122	0.278855	1.00525	1.7063	0.441909		1.76498	0.392413	0.353555
6679	PE(O-16:0/20:1)		PE Ether	54367	DMS-MS	100010515							2.55063	0.841217	0.8109	1.0339	3.658	1.0222	0.4782	0.3184	0.9217	0.5975	0.3184	2.5346	2.2565	0.3184	0.665991	0.849141	3.00431	0.839532	0.392745	0.261502	1.09567	0.710281	0.378499	3.01302	2.68242	0.378499		0.728135	0.129116	0.212239
6680	PE(O-16:0/20:2)		PE Ether	53511	DMS-MS	100009659							1.20145	0.533383	0.5497	0.9884	2.9701	0.8556	0.7507	0.256	0.256	0.4414	0.256	1.0822	1.5281	0.256	0.728803	1.31044	3.93782	1.13437	0.995293	0.33941	0.479955	0.827547	0.479955	2.02893	2.86492	0.479955		1.17942	0.572	0.442975
6681	PE(O-16:0/20:3)		PE Ether	54200	DMS-MS	100010348							0.981083	0.709317	1.3584	1.1745	2.262	0.9181	1.1255	0.3107	0.6284	0.8789	0.1837	1.1394	2.1086	0.1837	1.1079	0.957915	1.84487	0.748797	0.917951	0.253405	0.885923	1.23908	0.258982	1.60633	2.97272	0.258982		0.80737	0.982964	0.588257
6682	PE(O-16:0/20:4)		PE Ether	53329	DMS-MS	100009477							0.921167	0.803883	1.7047	1.251	2.2353	1.0988	1.1611	0.496	0.563	0.9116	0.1602	0.9234	1.6717	0.1756	1.23451	0.905953	1.61877	0.795732	0.840849	0.359195	0.70035	1.134	0.199283	1.14867	2.07953	0.21844		1.05013	0.208411	0.258131
6683	PE(O-16:0/20:5)		PE Ether	53330	DMS-MS	100009478							0.753867	0.875333	1.2899	0.9165	1.1211	0.6716	1.0544	0.8817	0.6716	0.6716	0.6716	0.8222	1.0474	0.6716	1.0815	0.768425	0.939968	0.563092	0.884045	0.739247	0.767251	0.767251	0.767251	0.939299	1.19657	0.767251		0.956079	0.0109164	0.119665
6684	PE(O-16:0/22:1)		PE Ether	53851	DMS-MS	100009999							0.7507	0.3948	0.3948	0.3948	1.6509	0.3948	0.3948	0.3948	0.3948	0.3948	0.3948	0.3948	0.8137	0.3948	0.434443	0.434443	1.81667	0.434443	0.434443	0.434443	1	1	1	1	2.06104	1		0.564914	0.290802	0.303251
6685	PE(O-16:0/22:2)		PE Ether	54201	DMS-MS	100010349							0.674533	0.5829	0.7533	0.5829	1.5608	0.5829	0.5829	0.5829	0.5829	0.5829	0.5829	0.5829	0.8979	0.5829	0.756376	0.58528	1.56717	0.58528	0.58528	0.58528	1	1	1	1	1.5404	1		0.713208	0.826609	0.540103
6686	PE(O-16:0/22:4)		PE Ether	53852	DMS-MS	100010000							1.37807	1.02548	4.951	1.6648	3.2121	0.7823	3.781	0.518	0.6371	1.3735	0.0888	1.836	3.3206	0.1547	3.26907	1.09924	2.1209	0.51654	2.49653	0.342027	0.621268	1.33937	0.0865933	1.79038	3.23808	0.150856		1.36224	0.42412	0.367384
6687	PE(O-16:0/22:5)		PE Ether	53331	DMS-MS	100009479							1.24645	0.95	2.4091	1.5757	1.8975	0.8597	1.8591	0.7184	0.5407	1.648	0.2091	1.661	1.87	0.3564	2.03065	1.32817	1.59942	0.724649	1.56705	0.605546	0.569158	1.73474	0.220105	1.74842	1.96842	0.375158		1.18735	0.720712	0.500517
6688	PE(O-16:0/22:6)		PE Ether	53332	DMS-MS	100009480							1.075	0.886967	2.2223	1.7183	1.7118	0.8959	1.5306	0.4457	0.4922	1.1971	0.1097	1.3288	1.5776	0.1097	1.8485	1.42928	1.42387	0.745207	1.27315	0.370732	0.554925	1.34966	0.12368	1.49814	1.77865	0.12368		1.30615	0.304635	0.31133
6690	PE(O-18:0/16:0)		PE Ether	53333	DMS-MS	100009481							1.27097	0.69795	1.0128	0.7549	2.439	1.201	1.0275	0.3377	0.9872	0.275	0.2547	1.3487	4.0857	0.2547	0.865333	0.644984	2.08387	1.02613	0.877892	0.28853	1.41443	0.394011	0.364926	1.93237	5.85386	0.364926		0.560485	0.391702	0.353261
6691	PE(O-18:0/16:1)		PE Ether	53334	DMS-MS	100009482							1.28058	0.70695	1.0809	0.3135	1.257	0.3135	0.3135	0.3135	0.3135	0.3135	0.3135	1.281	2.2805	0.3135	0.686896	0.199225	0.798805	0.199225	0.199225	0.199225	0.443454	0.443454	0.443454	1.81201	3.22583	0.443454		0.335102	0.226771	0.269086
6692	PE(O-18:0/18:0)		PE Ether	53853	DMS-MS	100010001							1.06102	0.741517	0.759	0.9718	1.5349	0.3523	0.9765	0.3523	0.3523	0.3523	0.3523	0.8834	1.2723	0.3523	0.559116	0.715875	1.13068	0.259521	0.719337	0.259521	0.475107	0.475107	0.475107	1.19134	1.71581	0.475107		0.757981	0.932171	0.576069
6693	PE(O-18:0/18:1)		PE Ether	53513	DMS-MS	100009661							1.92947	1.04015	1.0155	1.1086	2.366	1.1591	0.9845	0.4066	0.6053	0.7876	0.1674	1.4079	2.1532	0.3542	0.88507	0.966212	2.06211	1.01023	0.858052	0.354377	0.581935	0.757198	0.160938	1.35355	2.07009	0.340528		1.16561	0.430337	0.369814
6694	PE(O-18:0/18:2)		PE Ether	54368	DMS-MS	100010516							1.92675	1.04772	1.0534	0.7269	2.3025	1.5116	0.6807	0.3957	0.6989	0.6864	0.301	0.745	1.9107	0.5768	1.04915	0.723968	2.29321	1.5055	0.677954	0.394104	0.66707	0.655139	0.287291	0.71107	1.82368	0.550531		1.41517	0.454882	0.382316
6695	PE(O-18:0/18:3)		PE Ether	54369	DMS-MS	100010517							0.6587	0.6587	0.6587	0.6587	0.6587	0.6587	0.6587	0.6587	0.6587	0.6587	0.6587	0.6587	1	0.6587	0.677002	0.677002	0.677002	0.677002	0.677002	0.677002	1	1	1	1	1.51814	1		0.623185	0.363217	0.338856
6697	PE(O-18:0/20:1)		PE Ether	53514	DMS-MS	100009662							2.00298	0.75245	0.5483	1.2205	4.9753	0.6079	0.4962	0.3125	0.3125	0.3125	0.3125	1.2496	2.0078	0.3125	0.285568	0.635666	2.59126	0.316609	0.258433	0.162758	0.41531	0.41531	0.41531	1.66071	2.66835	0.41531		0.709529	0.564527	0.4396
6698	PE(O-18:0/20:2)		PE Ether	53515	DMS-MS	100009663							1.35315	0.805767	0.7755	0.9098	4.4375	0.8189	0.7904	0.3122	1.1713	0.3122	0.3122	0.9002	1.7245	0.3122	0.235993	0.276862	1.35038	0.2492	0.240527	0.0950058	1.45365	0.387457	0.387457	1.1172	2.1402	0.387457		0.416788	0.983197	0.588257
6699	PE(O-18:0/20:3)		PE Ether	53335	DMS-MS	100009483							1.20248	0.82125	1.128	1.1094	3.3383	1.0395	0.9838	0.3433	0.747	0.4221	0.3108	0.8443	2.533	0.4556	1.03646	1.01937	3.0674	0.955145	0.903965	0.315441	0.909589	0.513973	0.378447	1.02807	3.08432	0.554764		1.12809	0.967529	0.584729
6700	PE(O-18:0/20:4)		PE Ether	54203	DMS-MS	100010351							1.20383	0.83755	1.2879	1.2419	3.9297	1.2971	1.0441	0.3614	0.5184	0.7571	0.1248	0.861	2.5484	0.1842	0.633367	0.610745	1.93256	0.637892	0.513471	0.17773	0.618948	0.903946	0.149006	1.028	3.04268	0.219927		0.755683	0.657949	0.482357
6701	PE(O-18:0/20:5)		PE Ether	54204	DMS-MS	100010352							0.9166	0.750217	0.7312	0.741	1.6549	0.8093	0.8791	0.5192	0.5192	0.5192	0.5192	0.9821	1.636	0.5192	0.546474	0.553798	1.23682	0.604843	0.657009	0.388032	0.692067	0.692067	0.692067	1.30909	2.1807	0.692067		0.637094	0.815945	0.536275
6702	PE(O-18:0/22:1)		PE Ether	54559	DMS-MS	100010707							0.512117	0.3265	0.3265	0.3265	2.0675	0.3265	0.3265	0.3265	0.3265	0.3265	0.3265	0.3265	0.7311	0.3265	0.146123	0.146123	0.925297	0.146123	0.146123	0.146123	1	1	1	1	2.2392	1		0.228742	0.996972	0.590741
6703	PE(O-18:0/22:2)		PE Ether	54560	DMS-MS	100010708							0.37015	0.3304	0.3304	0.3304	1.9583	0.3304	0.3304	0.3304	0.3304	0.3304	0.3304	0.3304	0.9919	0.3304	0.252194	0.252194	1.49477	0.252194	0.252194	0.252194	1	1	1	1	3.00212	1		0.344377	0.727723	0.502067
6704	PE(O-18:0/22:4)		PE Ether	54019	DMS-MS	100010167							1.55943	0.937383	3.8861	1.6357	4.7725	0.7996	3.5368	0.4485	0.4788	0.9869	0.1138	1.4245	3.9663	0.149	6.98144	2.93856	8.57387	1.43649	6.35391	0.805737	0.510784	1.05282	0.121402	1.51966	4.23125	0.158953		3.56688	0.670581	0.485433
6705	PE(O-18:0/22:5)		PE Ether	54370	DMS-MS	100010518							1.2869	0.746917	1.8156	1.506	2.4074	0.8068	1.8391	0.5366	0.4685	1.0595	0.2318	1.1537	1.7139	0.2318	1.3951	1.1572	1.84983	0.61994	1.41315	0.41232	0.627245	1.4185	0.310343	1.54462	2.29463	0.310343		1.05255	0.86351	0.552935
6706	PE(O-18:0/22:6)		PE Ether	54371	DMS-MS	100010519							1.05117	0.594333	1.5103	1.285	2.1399	0.8503	1.196	0.3469	0.3507	0.6403	0.1235	0.8044	1.6661	0.1567	2.29401	1.9518	3.25032	1.29153	1.81662	0.52691	0.590073	1.07734	0.207796	1.35345	2.80331	0.263657		1.76808	0.812822	0.535115
6707	PE(P-14:0/18:0)		PE Plasmalogen	53516	DMS-MS	100009664							0.599867	0.643067	0.5918	0.5918	0.5918	0.5918	0.5918	0.5918	0.5918	0.5918	0.5918	0.5918	0.5918	0.5918	0.554804	0.554804	0.554804	0.554804	0.554804	0.554804	0.920278	0.920278	0.920278	0.920278	0.920278	0.920278		0.602866	NA	NA
6708	PE(P-14:0/18:1)		PE Plasmalogen	54372	DMS-MS	100010520							0.635517	0.3898	0.3898	0.3898	0.3898	0.3898	0.3898	0.3898	0.3898	0.3898	0.3898	0.3898	1.1108	0.3898	0.237731	0.237731	0.237731	0.237731	0.237731	0.237731	1	1	1	1	2.84967	1		0.181713	0.0738872	0.176735
6711	PE(P-16:0/16:0)		PE Plasmalogen	54373	DMS-MS	100010521							1.29058	1.01438	0.9309	0.8626	1.1086	1	0.8376	0.855	1.2544	0.5877	0.3268	2.017	2.3187	0.4553	0.584033	0.541183	0.695519	0.627385	0.525498	0.536414	1.23661	0.579367	0.322166	1.9884	2.28582	0.448844		0.511576	0.273706	0.293739
6712	PE(P-16:0/16:1)		PE Plasmalogen	54374	DMS-MS	100010522							1.01033	1.33993	0.8032	1.0546	0.6308	1.0293	0.5689	0.9384	2.0242	1.3727	2.0801	1.511	1.4123	1.2034	0.590798	0.775717	0.463988	0.757107	0.418458	0.690245	1.51067	1.02445	1.55239	1.12767	1.05401	0.898104		0.515719	0.0262691	0.169564
6713	PE(P-16:0/18:0)		PE Plasmalogen	54375	DMS-MS	100010523							1.13403	0.908783	0.7913	1.4819	1.4148	0.9065	0.8388	0.7157	0.7683	1.456	0.3595	1.4975	1.6151	0.2785	0.351348	0.657984	0.62819	0.402498	0.372439	0.317781	0.845416	1.60214	0.395584	1.64781	1.77721	0.306454		0.41527	0.538026	0.426324
6714	PE(P-16:0/18:1)		PE Plasmalogen	53336	DMS-MS	100009484							1.18385	0.858483	0.5142	1.4925	1.2787	0.8188	0.5335	0.445	0.5815	1.522	0.4046	1.5119	1.5667	0.4403	0.28959	0.840553	0.720144	0.461136	0.300459	0.250617	0.677357	1.77289	0.471296	1.76113	1.82496	0.512881		0.407733	0.18966	0.244416
6715	PE(P-16:0/18:2)		PE Plasmalogen	54561	DMS-MS	100010709							1.50157	1.03358	0.768	0.9876	1.2544	1.1204	0.5627	0.4775	0.825	0.5911	0.501	1.2425	1.6704	0.565	0.46938	0.603594	0.766654	0.684757	0.343907	0.291835	0.798194	0.571894	0.484721	1.20213	1.61613	0.546642		0.605423	0.186707	0.242191
6716	PE(P-16:0/18:3)		PE Plasmalogen	53854	DMS-MS	100010002							0.766933	0.586183	0.7054	0.994	1.1785	0.4851	0.9146	0.4851	0.4851	0.6553	0.4851	0.994	1.204	0.4851	0.242307	0.341442	0.404818	0.166633	0.314168	0.166633	0.827557	1.11791	0.827557	1.69572	2.05396	0.827557		0.222577	0.488498	0.39983
6718	PE(P-16:0/20:1)		PE Plasmalogen	53520	DMS-MS	100009668							1.1432	0.91955	0.5215	1.3398	2.0995	0.6534	0.4631	0.5749	0.7104	0.7949	0.3964	1.9249	1.5595	0.3468	0.278138	0.714573	1.11975	0.348486	0.246991	0.306619	0.772552	0.864445	0.43108	2.09331	1.69594	0.377141		0.483532	0.573068	0.443057
6719	PE(P-16:0/20:2)		PE Plasmalogen	54376	DMS-MS	100010524							0.9487	0.814833	0.7391	1.2742	1.9345	0.848	0.6272	0.6512	0.8513	0.5815	0.2221	1.6239	1.8396	0.3765	0.230913	0.398092	0.604386	0.264937	0.195953	0.203451	1.04475	0.713643	0.272571	1.99292	2.25764	0.462058		0.281413	0.890548	0.56418
6720	PE(P-16:0/20:3)		PE Plasmalogen	53855	DMS-MS	100010003							0.922617	0.948267	1.252	1.4641	1.5273	0.8458	1.0418	0.7459	0.5739	0.9051	0.2388	1.4016	1.821	0.3258	0.535165	0.625826	0.652841	0.361535	0.445315	0.318833	0.60521	0.954478	0.251828	1.47807	1.92035	0.343574		0.529309	0.33187	0.327531
6721	PE(P-16:0/20:4)		PE Plasmalogen	54020	DMS-MS	100010168							0.878983	0.9712	1.521	1.4927	1.2994	0.8553	1.3193	0.801	0.5938	1.0429	0.2301	1.0369	1.0959	0.2161	0.974188	0.956062	0.832255	0.547813	0.845001	0.513034	0.611409	1.07383	0.236923	1.06765	1.1284	0.222508		1.07548	0.0161112	0.141287
6722	PE(P-16:0/20:5)		PE Plasmalogen	54562	DMS-MS	100010710							0.66595	0.977233	1.3141	1.3016	0.9759	0.7615	1.0142	0.5129	0.4349	0.9244	0.4349	1.4569	1.6019	0.4349	0.766649	0.759356	0.569342	0.444261	0.591687	0.299227	0.445032	0.945936	0.445032	1.49084	1.63922	0.445032		0.633979	0.0827837	0.181062
6723	PE(P-16:0/22:1)		PE Plasmalogen	53856	DMS-MS	100010004							0.652217	0.64075	0.2907	0.9827	1.4896	0.2907	0.2907	0.2907	0.2907	0.2907	0.2907	1.1577	1.0599	0.2907	0.122814	0.415167	0.62932	0.122814	0.122814	0.122814	0.453687	0.453687	0.453687	1.80679	1.65416	0.453687		0.291098	0.908325	0.570522
6724	PE(P-16:0/22:2)		PE Plasmalogen	54205	DMS-MS	100010353							0.905683	0.816083	0.8534	0.8901	1.1436	0.4653	0.8721	1.0853	0.4653	0.5245	0.4653	0.9326	1.2346	0.4653	0.264054	0.275409	0.353846	0.14397	0.26984	0.335807	0.570162	0.642704	0.570162	1.14278	1.51284	0.570162		0.328008	0.486159	0.39898
6725	PE(P-16:0/22:4)		PE Plasmalogen	54206	DMS-MS	100010354							1.09892	1.07617	2.811	1.6294	1.8701	0.8035	2.5954	0.7988	0.5489	1.0346	0.1771	1.5719	1.9404	0.1691	1.37367	0.796247	0.913871	0.39265	1.26831	0.390354	0.510051	0.961375	0.164566	1.46065	1.80307	0.157132		1.01548	0.107584	0.195148
6726	PE(P-16:0/22:5)		PE Plasmalogen	53521	DMS-MS	100009669							0.9297	0.93645	1.395	1.4904	1.1189	0.8195	1.378	0.8141	0.5274	1.0635	0.2141	1.2794	1.0749	0.2027	0.72185	0.771216	0.578981	0.424055	0.713054	0.421261	0.563191	1.13567	0.228629	1.36622	1.14785	0.216456		0.779391	0.0823646	0.180575
6727	PE(P-16:0/22:6)		PE Plasmalogen	53679	DMS-MS	100009827							0.974183	1.02473	1.8677	2.0293	1.252	0.9124	1.5871	0.6417	0.4985	1.1263	0.2165	1.2016	1.2932	0.1856	1.1999	1.30372	0.804343	0.586168	1.01963	0.412258	0.486468	1.09912	0.211274	1.1726	1.26199	0.18112		1.20701	0.0499483	0.17396
6728	PE(P-16:1/18:1)		PE Plasmalogen	54207	DMS-MS	100010355							1.10107	0.860633	0.9585	1.4008	0.9298	0.8876	0.9647	0.314	0.314	1.3445	0.314	1.1743	1.0471	0.314	1.13048	1.65215	1.09663	1.04686	1.1378	0.370341	0.364848	1.56222	0.364848	1.36446	1.21666	0.364848		1.22841	0.863125	0.552935
6730	PE(P-18:0/16:0)		PE Plasmalogen	53337	DMS-MS	100009485							1.1704	0.722267	1.4276	1.0032	1.6353	0.8361	1.4098	0.3924	0.9266	0.4031	0.1166	1.8839	3.0193	0.1751	1.11081	0.780589	1.27243	0.650569	1.09696	0.305326	1.28291	0.558104	0.161436	2.60832	4.18031	0.242431		0.577482	0.445011	0.377317
6731	PE(P-18:0/16:1)		PE Plasmalogen	53857	DMS-MS	100010005							1.395	1.10712	0.7472	1.1405	0.722	0.7725	0.9957	0.7036	1.4848	0.9933	1.0595	1.2642	2.4852	0.7455	0.784585	1.19756	0.758125	0.811151	1.04552	0.738804	1.34114	0.897195	0.95699	1.14189	2.24475	0.673371		0.735424	0.0445558	0.17396
6732	PE(P-18:0/18:0)		PE Plasmalogen	53522	DMS-MS	100009670							1.51845	0.991517	0.9054	1	1.9123	0.9123	0.741	0.3248	0.6633	0.7289	0.3248	1.2193	1.628	0.3248	1.471	1.6247	3.1069	1.48221	1.2039	0.527701	0.668975	0.735136	0.327579	1.22973	1.64193	0.327579		1.90966	0.48572	0.398975
6733	PE(P-18:0/18:1)		PE Plasmalogen	53338	DMS-MS	100009486							2.33953	1.15037	0.6378	1.2989	2.0512	0.9791	0.6207	0.3382	0.6139	0.9294	0.2912	1.5563	2.0549	0.3547	0.5726	1.16612	1.84151	0.87901	0.557248	0.303627	0.533656	0.807916	0.253137	1.35287	1.7863	0.308336		1.05511	0.170125	0.23346
6734	PE(P-18:0/18:2)		PE Plasmalogen	54377	DMS-MS	100010525							2.02407	1.29448	0.62	0.8479	1.8318	1.1042	0.5319	0.3318	0.6779	0.3964	0.2786	1.0832	2.0364	0.3432	0.529274	0.723824	1.56375	0.942619	0.454066	0.283247	0.523684	0.306223	0.215221	0.836782	1.57314	0.265125		1.20876	0.458836	0.383043
6735	PE(P-18:0/18:3)		PE Plasmalogen	53523	DMS-MS	100009671							0.832683	0.717	0.695	1.2533	1.1053	0.8938	0.6513	0.4129	0.4129	0.4129	0.4129	0.4129	1.2933	0.4129	0.320999	0.57886	0.510504	0.412818	0.300815	0.190706	0.575872	0.575872	0.575872	0.575872	1.80377	0.575872		0.494265	0.405111	0.360412
6737	PE(P-18:0/20:1)		PE Plasmalogen	53339	DMS-MS	100009487							1.3948	0.90435	0.5051	1.0581	3.1674	0.7537	0.3979	0.3853	0.6504	0.5249	0.3853	1.4316	1.8867	0.3853	0.563424	1.18028	3.53314	0.84073	0.443845	0.42979	0.719191	0.580417	0.426052	1.58302	2.08625	0.426052		1.20104	0.612706	0.460179
6738	PE(P-18:0/20:2)		PE Plasmalogen	53340	DMS-MS	100009488							0.88445	0.690717	0.4641	1.0608	2.6783	0.8319	0.3968	0.2523	0.4835	0.2413	0.1933	1.3357	1.8403	0.1933	0.313673	0.716967	1.81019	0.562259	0.268187	0.170523	0.699998	0.349347	0.279854	1.93379	2.66433	0.279854		0.618929	0.951539	0.581619
6739	PE(P-18:0/20:3)		PE Plasmalogen	54564	DMS-MS	100010712							1.22667	1.03042	0.8936	1.6555	2.6392	0.9912	0.8768	0.4869	0.5919	0.6807	0.1498	1.5186	2.8595	0.2537	0.532687	0.986866	1.57326	0.590868	0.522672	0.290248	0.574428	0.660607	0.145378	1.47377	2.77509	0.246211		0.765316	0.92675	0.573959
6740	PE(P-18:0/20:4)		PE Plasmalogen	53524	DMS-MS	100009672							1.0526	0.826617	1.0076	1.5948	2.0635	0.9321	1.0222	0.5345	0.4347	0.8409	0.1671	0.9694	1.5536	0.1609	0.525933	0.832431	1.07708	0.486525	0.533554	0.278991	0.525879	1.01728	0.202149	1.17273	1.87947	0.194649		0.748076	0.399161	0.357891
6741	PE(P-18:0/20:5)		PE Plasmalogen	54208	DMS-MS	100010356							0.718433	0.78865	1.0917	1.1056	1.3113	0.8492	0.8895	0.4704	0.6505	0.8764	0.1851	1.3074	1.897	0.1851	1.33724	1.35427	1.60623	1.0402	1.08956	0.5762	0.824827	1.11127	0.234705	1.65777	2.40538	0.234705		1.08271	0.536826	0.426324
6742	PE(P-18:0/22:1)		PE Plasmalogen	53858	DMS-MS	100010006							0.706667	0.487983	0.2255	0.2255	2.0366	0.2255	0.2255	0.2255	0.2255	0.2255	0.2255	1.0602	1.0417	0.2255	0.109434	0.109434	0.988353	0.109434	0.109434	0.109434	0.462106	0.462106	0.462106	2.17262	2.1347	0.462106		0.249446	0.626432	0.468577
6743	PE(P-18:0/22:2)		PE Plasmalogen	53525	DMS-MS	100009673							0.853217	0.4878	0.8625	0.782	1.9948	0.3394	0.869	0.693	0.3394	0.4986	0.3394	0.8838	1.6113	0.3394	1.04442	0.946941	2.41555	0.410987	1.05229	0.839169	0.695777	1.02214	0.695777	1.81181	3.3032	0.695777		0.815779	0.580878	0.447218
6744	PE(P-18:0/22:4)		PE Plasmalogen	53680	DMS-MS	100009828							1.22803	0.835867	2.8291	1.6818	2.6642	0.8288	2.8097	0.5759	0.3802	0.7899	0.1154	1.3534	2.4177	0.1305	3.72814	2.21625	3.51084	1.09218	3.70258	0.758912	0.454857	0.945007	0.13806	1.61916	2.89245	0.156125		2.41858	0.378107	0.34543
6745	PE(P-18:0/22:5)		PE Plasmalogen	53681	DMS-MS	100009829							1.22958	0.800083	1.5911	1.7706	1.9311	0.9036	1.7348	0.7215	0.4074	0.9291	0.174	1.3568	1.4034	0.1553	0.813945	0.90577	0.987876	0.462247	0.887457	0.369091	0.509197	1.16125	0.217477	1.69582	1.75407	0.194105		0.800153	0.476389	0.394123
6746	PE(P-18:0/22:6)		PE Plasmalogen	54209	DMS-MS	100010357							1.36732	0.916567	1.8194	2.4002	2.3215	1.0529	1.6408	0.5134	0.5224	0.9762	0.1732	1.3742	1.9703	0.1504	1.73986	2.29527	2.22001	1.00687	1.56907	0.490955	0.569953	1.06506	0.188966	1.49929	2.14965	0.164091		1.65372	0.538461	0.426324
6748	PE(P-18:1/16:0)		PE Plasmalogen	54565	DMS-MS	100010713							1.14192	0.82855	1.3218	0.9827	1.1495	0.7188	1.4454	0.6353	0.9241	0.452	0.1075	1.9998	2.6043	0.2224	1.65318	1.22907	1.43768	0.899006	1.80777	0.794572	1.11532	0.545531	0.129745	2.41361	3.1432	0.268421		1.02698	0.519609	0.418596
6749	PE(P-18:1/16:1)		PE Plasmalogen	53341	DMS-MS	100009489							1.01463	0.9209	1.1393	1.1908	0.6153	0.7188	1	0.6869	1.5918	0.8026	0.6626	1.8002	2.2008	0.6289	0.940741	0.983265	0.508065	0.593526	0.825718	0.567186	1.72853	0.871539	0.719514	1.95483	2.38984	0.682919		0.529342	0.152704	0.224172
6750	PE(P-18:1/18:0)		PE Plasmalogen	54566	DMS-MS	100010714							1.36943	0.8533	1.0588	0.8936	1.232	0.5864	0.8002	0.5532	0.6279	1.0018	0.2909	0.9982	1.2274	0.2909	2.63656	2.22519	3.06786	1.46022	1.99261	1.37755	0.735849	1.17403	0.340912	1.16981	1.43842	0.340912		2.45388	0.277999	0.29525
6751	PE(P-18:1/18:1)		PE Plasmalogen	54210	DMS-MS	100010358							2.10173	0.9471	0.8751	1.3687	1.1268	0.8287	0.8756	0.3568	0.6329	1.276	0.2607	1.6775	1.5726	0.3278	0.264367	0.413484	0.340406	0.25035	0.264518	0.107789	0.66825	1.34727	0.275261	1.7712	1.66044	0.346109		0.270398	0.08647	0.181453
6752	PE(P-18:1/18:2)		PE Plasmalogen	54211	DMS-MS	100010359							1.46895	1.04705	1.2514	1.0234	0.9672	0.9488	1.0454	0.4318	0.6905	0.4099	0.2391	1.0921	1.5794	0.3105	0.560655	0.458506	0.433327	0.425083	0.468362	0.193456	0.659472	0.391481	0.228356	1.04303	1.50843	0.296547		0.615265	0.843617	0.54436
6753	PE(P-18:1/18:3)		PE Plasmalogen	54379	DMS-MS	100010527							0.802983	0.83825	0.8003	0.8003	0.8003	0.8003	0.8003	0.8003	0.8003	0.8003	0.8003	0.8003	1.1238	0.8003	0.54674	0.54674	0.54674	0.54674	0.54674	0.54674	0.954727	0.954727	0.954727	0.954727	1.34065	0.954727		0.536521	0.741949	0.507668
6755	PE(P-18:1/20:1)		PE Plasmalogen	54212	DMS-MS	100010360							1.11968	0.822233	0.5375	1.0554	1.648	0.7682	0.5455	0.4868	0.777	0.6609	0.334	1.6317	1.4371	0.334	0.332728	0.653323	1.02016	0.475538	0.33768	0.301343	0.944987	0.803786	0.406211	1.98447	1.7478	0.406211		0.495875	0.377149	0.34543
6756	PE(P-18:1/20:2)		PE Plasmalogen	53342	DMS-MS	100009490							0.883467	0.661517	0.8829	1.1472	1.8704	0.6543	0.8947	0.2422	0.5938	0.3939	0.2422	1.2398	1.6109	0.2422	0.695571	0.903793	1.47355	0.515474	0.704867	0.190811	0.897634	0.59545	0.366128	1.87418	2.43516	0.366128		0.686195	0.972525	0.586061
6757	PE(P-18:1/20:3)		PE Plasmalogen	53682	DMS-MS	100009830							0.8424	0.930317	1.3327	1.338	1.2351	0.6338	1.2311	0.4116	0.5559	0.8866	0.1132	1.3667	1.5345	0.2076	0.854962	0.858362	0.792349	0.406599	0.789783	0.264052	0.597538	0.953009	0.121679	1.46907	1.64944	0.22315		0.791025	0.261976	0.286834
6758	PE(P-18:1/20:4)		PE Plasmalogen	53859	DMS-MS	100010007							0.812667	0.95805	1.6401	1.3908	1.1323	0.69	1.417	0.5174	0.5678	1.1243	0.1373	1.0918	1.0717	0.1717	1.24168	1.05295	0.85724	0.522384	1.07278	0.391713	0.592662	1.17353	0.143312	1.13961	1.11863	0.179218		1.18215	0.0493465	0.17396
6759	PE(P-18:1/20:5)		PE Plasmalogen	54380	DMS-MS	100010528							0.451417	0.78225	1.1805	0.7318	0.795	0.3654	1.0553	0.3654	0.3654	0.6341	0.3654	0.9966	1.264	0.3654	0.96209	0.596406	0.647913	0.297795	0.860054	0.297795	0.467114	0.81061	0.467114	1.27402	1.61585	0.467114		0.717793	0.0562716	0.17396
6760	PE(P-18:1/22:1)		PE Plasmalogen	54213	DMS-MS	100010361							0.64885	0.572083	0.5503	0.5503	1.0736	0.5503	0.5503	0.5503	0.5503	0.5503	0.5503	1.0114	0.8499	0.5503	0.481038	0.481038	0.938475	0.481038	0.481038	0.481038	0.961923	0.961923	0.961923	1.76792	1.48562	0.961923		0.470857	0.333125	0.327738
6761	PE(P-18:1/22:2)		PE Plasmalogen	53683	DMS-MS	100009831							0.471717	0.546683	0.8907	0.2875	0.9741	0.2875	1.0055	0.2875	0.2875	0.2875	0.2875	1.3046	1.3817	0.2875	0.614445	0.198331	0.671978	0.198331	0.69364	0.198331	0.525899	0.525899	0.525899	2.38639	2.52742	0.525899		0.366952	0.779165	0.521415
6762	PE(P-18:1/22:4)		PE Plasmalogen	54567	DMS-MS	100010715							1.11683	1.06952	3.8199	1.6626	1.7426	0.8715	3.7121	0.6373	0.748	0.9728	0.1039	2.0078	2.1884	0.1358	3.02854	1.31816	1.38159	0.690954	2.94307	0.505272	0.699381	0.90957	0.0971467	1.8773	2.04616	0.126973		1.71416	0.175824	0.236656
6763	PE(P-18:1/22:5)		PE Plasmalogen	53343	DMS-MS	100009491							1.0538	1.04345	1.8368	1.7172	1.2686	0.9589	1.7552	0.6928	0.6641	1.2161	0.1368	1.9128	1.6831	0.1991	1.34194	1.25456	0.92682	0.700558	1.28232	0.506149	0.636446	1.16546	0.131104	1.83315	1.61301	0.190809		1.07942	0.312684	0.316743
6764	PE(P-18:1/22:6)		PE Plasmalogen	54022	DMS-MS	100010170							1.00383	1.03963	2.127	2.1633	1.306	0.8666	1.9186	0.5091	0.5803	1.0685	0.119	1.5033	1.6435	0.151	2.91297	2.96268	1.78859	1.18683	2.62756	0.697222	0.558178	1.02777	0.114463	1.44599	1.58085	0.145244		2.4989	0.115393	0.201221
6765	PE(P-18:2/18:2)		PE Plasmalogen	54214	DMS-MS	100010362							1.4935	0.772167	1.6773	0.8353	0.8399	0.8563	1.3144	0.6085	0.2457	0.2457	0.2457	0.7603	1.1597	0.2457	1.13577	0.565615	0.56873	0.579835	0.890033	0.41204	0.318196	0.318196	0.318196	0.984632	1.50188	0.318196		1.10447	0.810752	0.535115
6766	PE(P-18:2/20:4)		PE Plasmalogen	54215	DMS-MS	100010363							1.02402	0.872667	3.0704	1.751	1.1105	0.8985	2.4264	0.9781	0.4108	1.01	0.1591	0.7408	0.9143	0.1591	3.54632	2.02241	1.28263	1.03777	2.80249	1.12971	0.470741	1.15737	0.182315	0.848892	1.04771	0.182315		3.03941	0.0349972	0.17396
6767	PE(P-18:2/22:6)		PE Plasmalogen	54023	DMS-MS	100010171							0.947667	0.785833	3.3618	2.1113	1.4086	1.0096	2.543	0.6826	0.121	0.848	0.121	0.9601	1.2163	0.121	3.66648	2.30265	1.53626	1.1011	2.77348	0.744465	0.153977	1.07911	0.153977	1.22176	1.54778	0.153977		2.81271	0.0399394	0.17396
7045	PI(16:0/16:0)	Phosphatidylinositol	PI Ester	54568	DMS-MS	100010716							1.04937	0.5296	0.8819	1.7418	0.4505	0.4505	0.4505	1.4766	0.4505	0.4505	0.4505	1.7139	0.8265	0.4505	0.852324	1.68339	0.435392	0.435392	0.435392	1.42708	0.850642	0.850642	0.850642	3.23622	1.56061	0.850642		0.642604	0.299107	0.306701
7048	PI(16:0/18:1)		PI Ester	53344	DMS-MS	100009492							1.30772	0.6797	0.7021	1.1278	0.6818	1.0287	0.3197	0.6632	1.2198	0.7858	0.314	1.479	1.9466	0.314	0.374191	0.601071	0.363371	0.548255	0.170387	0.353458	1.79462	1.1561	0.461969	2.17596	2.86391	0.461969		0.270428	0.0697067	0.175205
7049	PI(16:0/18:2)		PI Ester	54382	DMS-MS	100010530							0.851767	0.501567	0.8213	0.8336	0.6348	1.0421	0.5159	0.7393	0.3743	0.7511	0.3743	0.8544	1.6981	0.3743	0.598826	0.607794	0.462845	0.759816	0.376153	0.539038	0.746262	1.49751	0.746262	1.70346	3.38559	0.746262		0.378962	0.234746	0.272577
7054	PI(16:0/20:3)		PI Ester	53860	DMS-MS	100010008							0.606433	0.57405	0.8081	0.5545	0.5545	0.5545	0.5545	0.5545	0.5545	1.0375	0.5545	1.1545	1.7258	0.5545	0.567048	0.389096	0.389096	0.389096	0.389096	0.389096	0.965944	1.80733	0.965944	2.01115	3.00636	0.965944		0.258419	0.118494	0.203183
7055	PI(16:0/20:4)		PI Ester	53861	DMS-MS	100010009							0.640433	0.802367	1.3064	1.293	0.9533	0.8027	1.4062	0.605	0.6224	1.1606	0.6552	1.0477	1.2608	0.2732	1.14316	1.13143	0.834179	0.702398	1.23049	0.529401	0.775705	1.44647	0.816584	1.30576	1.57135	0.340493		0.890461	0.0548796	0.17396
7059	PI(16:0/22:4)		PI Ester	54383	DMS-MS	100010531							0.605033	0.595617	1.0367	1.0027	1.3537	0.3502	0.9202	0.3502	0.3502	0.3502	0.3502	1.2394	2.1731	0.3502	0.895263	0.865902	1.16902	0.302422	0.794657	0.302422	0.587962	0.587962	0.587962	2.08087	3.64849	0.587962		0.535772	0.955064	0.581619
7060	PI(16:0/22:5)		PI Ester	53527	DMS-MS	100009675							0.9708	1.00117	0.9708	0.9708	0.9708	0.9708	0.9708	0.9708	0.9708	0.9708	0.9708	0.9708	1	0.9708	0.932147	0.932147	0.932147	0.932147	0.932147	0.932147	0.969669	0.969669	0.969669	0.969669	0.998835	0.969669		0.95651	0.0033546	0.0792031
7061	PI(16:0/22:6)		PI Ester	54217	DMS-MS	100010365							1	1	1	1	1	1	1	1	1	1	1	1	1	1	0.799041	0.799041	0.799041	0.799041	0.799041	0.799041	1	1	1	1	1	1		0.799041	NA	NA
7080	PI(18:0/16:0)		PI Ester	53345	DMS-MS	100009493							1.0061	0.968333	1.2302	1.52	1.205	0.9227	1.456	0.8129	0.5159	1.4017	0.2901	1.6602	1.2232	0.2388	1.48536	1.83527	1.45493	1.11408	1.75799	0.981506	0.532771	1.44754	0.299587	1.71449	1.2632	0.246609		1.56774	0.378518	0.34543
7081	PI(18:0/16:1)		PI Ester	54569	DMS-MS	100010717							0.9546	0.9546	0.9546	0.9546	0.9546	0.9546	0.9546	0.9546	0.9546	0.9546	0.9546	0.9546	0.9546	0.9546	1.29505	1.29505	1.29505	1.29505	1.29505	1.29505	1	1	1	1	1	1		1.29505	NA	NA
7084	PI(18:0/18:1)		PI Ester	53684	DMS-MS	100009832							1.35647	0.963183	0.4325	0.9447	0.9081	1.0148	0.391	0.5871	1.094	0.5558	0.5772	2.0548	3.7126	0.7035	0.397147	0.86748	0.833872	0.93185	0.35904	0.53911	1.13582	0.577045	0.599263	2.13334	3.85451	0.730391		0.435032	0.123079	0.206692
7085	PI(18:0/18:2)		PI Ester	54218	DMS-MS	100010366							0.988367	0.653983	0.4619	0.8464	1.2224	1.1228	0.4255	0.4388	0.5262	0.332	0.2494	0.8591	3.4454	0.2494	0.451787	0.82787	1.19564	1.09822	0.416184	0.429193	0.804608	0.507658	0.381355	1.31364	5.26833	0.381355		0.510444	0.427062	0.367857
7086	PI(18:0/18:3)		PI Ester	54024	DMS-MS	100010172							1	1	1	1	1	1	1	1	1	1	1	1	1	1	1.00693	1.00693	1.00693	1.00693	1.00693	1.00693	1	1	1	1	1	1		1.00693	NA	NA
7089	PI(18:0/20:2)		PI Ester	53528	DMS-MS	100009676							0.7474	0.406733	0.2537	0.6245	0.9311	0.2537	0.2537	0.2537	0.2537	0.2537	0.2537	1.216	3.6077	0.2537	0.208421	0.513042	0.764921	0.208421	0.208421	0.208421	0.62375	0.62375	0.62375	2.98967	8.86994	0.62375		0.147106	0.237478	0.274023
7090	PI(18:0/20:3)		PI Ester	54025	DMS-MS	100010173							0.891717	0.74235	0.842	1.0689	1.4013	0.8487	0.7869	0.3658	0.3798	0.4745	0.3228	1.0911	2.4251	0.3387	0.868862	1.103	1.44601	0.875776	0.812004	0.37747	0.511619	0.639186	0.434835	1.46979	3.26679	0.456254		0.808902	0.786221	0.524984
7091	PI(18:0/20:4)		PI Ester	54026	DMS-MS	100010174							0.910817	0.76585	1.7538	1.2654	1.1234	0.8225	1.6852	0.6608	0.3576	0.8268	0.2883	0.9676	1.1254	0.1291	1.72842	1.24709	1.10714	0.810598	1.66081	0.651238	0.466932	1.07958	0.376444	1.26343	1.46948	0.168571		1.4935	0.101045	0.190681
7092	PI(18:0/20:5)		PI Ester	53529	DMS-MS	100009677							0.5156	0.5156	1	0.5156	0.5156	0.5156	0.5156	0.5156	0.5156	0.5156	0.5156	0.5156	0.5156	0.5156	1.14558	0.590663	0.590663	0.590663	0.590663	0.590663	1	1	1	1	1	1		0.68315	0.363217	0.338856
7094	PI(18:0/22:4)		PI Ester	53685	DMS-MS	100009833							0.987267	0.826467	1.2713	1.2864	1.6391	0.7015	1.0158	0.3282	0.5688	0.4085	0.3282	1.597	4.959	0.3282	2.34817	2.37606	3.02752	1.29571	1.87625	0.606206	0.688231	0.494273	0.397112	1.93232	6.00024	0.397112		1.16355	0.543258	0.429486
7095	PI(18:0/22:5)		PI Ester	54384	DMS-MS	100010532							0.505433	0.444733	0.7575	0.3903	0.3903	0.3903	0.3903	0.3903	0.3903	0.3903	0.3903	0.9649	1.4095	0.3903	0.1823	0.0939297	0.0939297	0.0939297	0.0939297	0.0939297	0.877605	0.877605	0.877605	2.16961	3.16931	0.877605		0.073672	0.213397	0.261298
7096	PI(18:0/22:6)		PI Ester	54219	DMS-MS	100010367							0.671767	0.587983	0.5637	0.7512	0.5637	0.5637	0.5637	0.5637	0.5637	0.5637	0.5637	0.5637	1.602	0.5637	0.187785	0.250247	0.187785	0.187785	0.187785	0.187785	0.958701	0.958701	0.958701	0.958701	2.72457	0.958701		0.158175	0.269952	0.292093
7098	PI(18:1/16:1)		PI Ester	54220	DMS-MS	100010368							1.34617	0.8391	0.7746	1.0854	0.2814	1.1011	0.7577	1.3424	1.4351	1.0866	0.2814	0.9625	0.8351	1.5156	0.00465715	0.00652578	0.00169187	0.00662018	0.00455554	0.00807095	1.71028	1.29496	0.335359	1.14706	0.995233	1.80622		0.00440677	0.0564236	0.17396
7099	PI(18:1/18:1)		PI Ester	53346	DMS-MS	100009494							1.34202	1.0457	0.8444	1.0248	0.6541	1.1465	0.445	0.5859	1.7644	0.7061	1.1287	1.502	1.3092	1.0848	0.0495847	0.0601781	0.0384099	0.0673245	0.0261312	0.0344051	1.68729	0.675241	1.07937	1.43636	1.25198	1.03739		0.0385111	0.00600887	0.102462
7100	PI(18:1/18:2)		PI Ester	53530	DMS-MS	100009678							1.15932	0.83585	1.2534	1.22	0.2663	0.8703	0.8168	0.8388	1.4399	0.6568	0.2663	0.8294	1.0074	1.1036	0.0122103	0.011885	0.00259423	0.00847827	0.00795708	0.0081714	1.72268	0.785787	0.318598	0.992283	1.20524	1.32033		0.00808462	0.231517	0.270234
7105	PI(18:1/20:3)		PI Ester	54027	DMS-MS	100010175							0.4169	0.632867	0.8361	1.1145	0.393	0.393	0.393	0.393	0.393	0.393	0.9804	0.393	0.9492	0.393	1.90847	2.54394	0.897055	0.897055	0.897055	0.897055	0.620984	0.620984	1.54914	0.620984	1.49984	0.620984		1.45323	0.213725	0.261352
7106	PI(18:1/20:4)		PI Ester	54221	DMS-MS	100010369							0.980483	0.8757	1.7098	1.1478	0.9068	0.9954	1.3367	0.6937	1.1881	0.8805	1.0231	1.023	1.0697	0.3029	0.278563	0.187001	0.147737	0.162172	0.217777	0.113018	1.35674	1.00548	1.16832	1.16821	1.22154	0.345895		0.176546	0.610818	0.459603
7116	PI(18:2/18:2)		PI Ester	53686	DMS-MS	100009834							0.475867	0.2013	0.2013	0.2013	0.2013	0.2013	0.2013	0.7727	0.2013	0.2013	0.2013	0.2013	0.2013	0.2013	0.00408503	0.00408503	0.00408503	0.00408503	0.00408503	0.0156806	1	1	1	1	1	1		0.00601763	0.118405	0.203183
6274	Total LPC	Phospholipid SUM	Lysophosphatidylcholines	54664	DMS-MS	100010827							0.981517	1.32797	1.1164	1.5298	1.4969	0.7497	1.3409	0.9985	0.6646	0.9315	0.4254	0.9352	0.8968	0.4504	0.566379	0.776108	0.759417	0.380343	0.680274	0.506566	0.500464	0.701448	0.320339	0.704235	0.675318	0.339165		1.1321	0.00156802	0.0727612
6276	Total LPE	Phospholipid SUM	Lysophosphatidylethanolamines	54665	DMS-MS	100010828							0.9319	1.09305	1.556	1.4528	1.2802	0.8868	1.5526	0.9093	0.8009	0.8515	0.4585	0.9637	0.9847	0.2656	1.05391	0.984015	0.867109	0.60065	1.05161	0.61589	0.73272	0.779013	0.419468	0.881661	0.900874	0.24299		1.30744	0.0024328	0.0756524
6273	Total PC	Phospholipid SUM	Phosphatidylcholines	54661	DMS-MS	100010824							0.84745	0.7777	1.5866	1.146	1.3971	0.7488	1.4854	0.6917	0.4784	0.8052	0.2674	0.9298	1.1982	0.2688	1.31081	0.946794	1.15425	0.618638	1.2272	0.571464	0.615147	1.03536	0.343834	1.19558	1.5407	0.345635		1.14832	0.0743971	0.176735
6275	Total PE	Phospholipid SUM	Phosphatidylethanolamines	54662	DMS-MS	100010825							0.90255	0.8265	1.5961	1.3377	1.3945	0.7718	1.4525	0.5574	0.5004	0.8667	0.2617	1.0599	1.2512	0.2287	1.4821	1.24216	1.2949	0.716676	1.34876	0.517589	0.605445	1.04864	0.316636	1.2824	1.51385	0.276709		1.309	0.126997	0.209568
6277	Total PI	Phospholipid SUM	Phosphatidylinositols	54663	DMS-MS	100010826							0.901217	0.747267	1.4814	1.1934	1.0516	0.8039	1.366	0.6093	0.4661	0.7607	0.3169	1.0326	1.498	0.1707	1.95978	1.57878	1.39119	1.0635	1.80712	0.806059	0.62374	1.01798	0.424079	1.38184	2.00464	0.228433		1.51503	0.433299	0.370113
6278	Total CER	Sphingolipid SUM	Ceramides	54667	DMS-MS	100010830							0.8643	0.962517	1.775	0.8206	1.2529	0.6511	1.3979	0.8837	0.6723	0.8305	0.3663	1.0175	1.24	0.3856	0.735162	0.339873	0.518921	0.26967	0.578976	0.366007	0.698481	0.862842	0.380565	1.05712	1.28829	0.400616		0.599116	0.0618998	0.175205
6279	Total DCER	Sphingolipid SUM	Dihydroceramides	54670	DMS-MS	100010833							0.959117	0.963233	0.9807	0.5487	1.3913	0.5042	1.4536	0.4974	0.7229	0.8081	0.4761	1.3457	1.9346	0.5008	0.937348	0.524444	1.3298	0.481912	1.38934	0.475412	0.750493	0.838945	0.494273	1.39707	2.00844	0.519916		0.855074	0.831152	0.540103
6280	Total HCER	Sphingolipid SUM	Hexosylceramides	54668	DMS-MS	100010831							1.25777	1.05045	4.6603	1.6889	1.9052	0.5695	3.547	0.564	0.4407	0.4118	0.0606	1.2428	1.4499	0.0779	5.32302	1.92907	2.17613	0.650485	4.0514	0.644203	0.419534	0.392022	0.0576896	1.18311	1.38027	0.0741587		4.21306	0.0945194	0.185761
6281	Total LCER	Sphingolipid SUM	Lactosylceramides	54669	DMS-MS	100010832							1.13717	1.13308	3.6766	1.0259	1.6468	0.7546	3.1525	0.7344	0.6072	1.2139	0.2506	1.1463	1.0104	0.4188	3.93114	1.09693	1.76081	0.806843	3.37076	0.785245	0.535883	1.07132	0.221166	1.01166	0.891726	0.369611		2.86531	0.102852	0.190742
6282	Total SM	Sphingolipid SUM	Sphingomyelins	54666	DMS-MS	100010829							0.922533	0.99165	1.3102	1.21	1.1945	0.8186	1.2171	0.6558	0.5771	1.0609	0.3638	1.0593	0.957	0.3279	1.12385	1.0379	1.0246	0.702169	1.04399	0.562524	0.581959	1.06983	0.366863	1.06822	0.965058	0.330661		1.25383	0.0430134	0.17396
7500	CER(14:0)	Sphingolipids	Ceramide	54496	DMS-MS	100010644							0.542	0.663167	2.1106	0.4544	0.4544	0.4544	1.1951	0.4544	1.0305	1.1541	0.9847	1.5399	1.0502	0.9854	#REF!	#REF!	#REF!	#REF!	#REF!	#REF!	1.55391	1.74029	1.48485	2.32204	1.58361	1.4859		#REF!	0.829651	0.540103
7501	CER(16:0)		Ceramide	53971	DMS-MS	100010119							0.87745	1.106	2.584	1.0014	1.3461	0.7326	1.781	1.1929	0.8185	0.8363	0.3037	0.9562	1.2339	0.3207	#REF!	#REF!	#REF!	#REF!	#REF!	#REF!	0.740054	0.756148	0.274593	0.864557	1.11564	0.289964		#REF!	0.0242653	0.168247
7502	CER(18:0)		Ceramide	54320	DMS-MS	100010468							1.1968	0.847167	1.7511	1.0832	1.4778	0.854	1.2272	0.8367	0.4432	1.1766	0.4165	0.7827	1	0.299	#REF!	#REF!	#REF!	#REF!	#REF!	#REF!	0.523156	1.38886	0.491639	0.923903	1.18041	0.352941		#REF!	0.374302	0.34543
7504	CER(18:1)		Ceramide	53626	DMS-MS	100009774							0.862017	0.936883	1.2291	0.3484	0.3484	0.3484	1.0153	0.9937	1.14	0.9415	1.4557	0.3484	0.5493	0.834	#REF!	#REF!	#REF!	#REF!	#REF!	#REF!	1.2168	1.00493	1.55377	0.371871	0.586306	0.890186		#REF!	0.683881	0.488532
7505	CER(20:0)		Ceramide	54321	DMS-MS	100010469							0.899233	0.9327	1.0028	0.9972	1.3143	0.7845	0.9482	0.9938	0.4901	1.6686	0.5626	1.1512	1.0674	0.5865	#REF!	#REF!	#REF!	#REF!	#REF!	#REF!	0.525464	1.789	0.603195	1.23427	1.14442	0.62882		#REF!	0.561806	0.439144
7506	CER(20:1)		Ceramide	53972	DMS-MS	100010120							0.854417	0.5982	0.5982	0.5982	0.5982	0.5982	0.5982	0.5982	0.5982	0.5982	0.5982	0.5982	0.5982	0.5982	#REF!	#REF!	#REF!	#REF!	#REF!	#REF!	1	1	1	1	1	1		#REF!	NA	NA
7507	CER(22:0)		Ceramide	53627	DMS-MS	100009775							0.856183	0.858983	1.203	0.6021	1.2057	0.5301	1.1896	0.7089	0.4323	0.9884	0.565	1.41	1.4049	0.5673	#REF!	#REF!	#REF!	#REF!	#REF!	#REF!	0.503269	1.15066	0.657754	1.64148	1.63554	0.660432		#REF!	0.948335	0.581619
7508	CER(22:1)		Ceramide	54127	DMS-MS	100010275							1.21675	0.788167	1.3466	0.6927	0.9684	0.9611	0.8326	0.9381	0.5662	1.1293	0.6556	1.379	1.198	0.6723	#REF!	#REF!	#REF!	#REF!	#REF!	#REF!	0.718376	1.43282	0.831804	1.74963	1.51998	0.852992		#REF!	0.0789025	0.178685
7509	CER(24:0)		Ceramide	54322	DMS-MS	100010470							0.92505	0.946	1.1516	0.7196	1.3913	0.6455	1.2848	0.852	0.5127	0.7243	0.4352	0.9939	1.7237	0.4474	#REF!	#REF!	#REF!	#REF!	#REF!	#REF!	0.541966	0.765645	0.460042	1.05063	1.82209	0.472939		#REF!	0.377991	0.34543
7510	CER(24:1)		Ceramide	53628	DMS-MS	100009776							0.834767	0.964967	1.3795	0.7513	1.204	0.6047	1.2547	0.6319	0.7565	0.7389	0.35	1.1607	1.1676	0.4251	#REF!	#REF!	#REF!	#REF!	#REF!	#REF!	0.783965	0.765726	0.362707	1.20284	1.20999	0.440533		#REF!	0.131893	0.212239
7511	CER(26:0)		Ceramide	54497	DMS-MS	100010645							1.12535	0.393	0.2862	0.2862	1.3972	0.9381	0.2862	0.2862	0.2862	1.1233	0.2862	0.2862	2.1261	0.2862	#REF!	#REF!	#REF!	#REF!	#REF!	#REF!	0.728244	2.85827	0.728244	0.728244	5.40992	0.728244		#REF!	0.151266	0.223932
7512	CER(26:1)		Ceramide	53798	DMS-MS	100009946							0.832783	0.4459	0.3655	0.3655	1.1005	0.3655	0.3655	0.3655	0.3655	0.8335	0.3655	0.8099	1.6253	0.3655	#REF!	#REF!	#REF!	#REF!	#REF!	#REF!	0.819691	1.86925	0.819691	1.81633	3.64499	0.819691		#REF!	0.0696532	0.175205
7519	DCER(16:0)		Dihydroceramide	54134	DMS-MS	100010282							0.842	1.05153	2.1448	0.887	1.5448	0.741	1.4647	0.7524	0.7341	0.5862	0.2782	1.1616	1.8861	0.3018	#REF!	#REF!	#REF!	#REF!	#REF!	#REF!	0.698123	0.557472	0.264566	1.10467	1.79367	0.287009		#REF!	0.0792573	0.178873
7520	DCER(18:0)		Dihydroceramide	53464	DMS-MS	100009612							0.771917	0.6197	0.3728	0.3728	1.1556	0.3728	0.8927	0.3728	0.3728	0.3728	0.3728	0.9428	0.6058	0.3728	#REF!	#REF!	#REF!	#REF!	#REF!	#REF!	0.601581	0.601581	0.601581	1.52138	0.97757	0.601581		#REF!	0.82814	0.540103
7522	DCER(20:0)		Dihydroceramide	53280	DMS-MS	100009428							0.4872	0.645833	0.4872	0.4872	0.4872	0.4872	0.4872	0.4872	0.4872	0.4872	0.4872	0.4872	0.7842	0.4872	#REF!	#REF!	#REF!	#REF!	#REF!	#REF!	0.754374	0.754374	0.754374	0.754374	1.21425	0.754374		#REF!	0.0786259	0.178685
7524	DCER(22:0)		Dihydroceramide	53465	DMS-MS	100009613							0.663417	0.565867	0.2889	0.2889	0.9854	0.2889	1.1879	0.2889	0.2889	0.7433	0.2889	1.7182	1.9382	0.2889	#REF!	#REF!	#REF!	#REF!	#REF!	#REF!	0.510544	1.31356	0.510544	3.0364	3.42519	0.510544		#REF!	0.275846	0.294662
7525	DCER(22:1)		Dihydroceramide	53804	DMS-MS	100016011							0.974917	0.567433	0.4326	0.4326	0.4326	0.4326	0.4326	0.4326	0.4326	0.4326	0.4326	0.4326	0.7266	0.4326	#REF!	#REF!	#REF!	#REF!	#REF!	#REF!	0.76238	0.76238	0.76238	0.76238	1.2805	0.76238		#REF!	0.00538483	0.0972226
7526	DCER(22:2)		Dihydroceramide	57732	DMS-MS	100009952							0.5131	0.498517	0.31	0.31	0.31	0.31	0.31	0.31	1.1249	1.6665	2.0425	0.9394	0.31	2.512	#REF!	#REF!	#REF!	#REF!	#REF!	#REF!	2.25649	3.34292	4.09715	1.88439	0.621845	5.03895		#REF!	0.0178585	0.149492
7527	DCER(24:0)		Dihydroceramide	54328	DMS-MS	100010476							0.834617	0.616417	0.2691	0.2691	0.8864	0.2691	0.8803	0.2691	0.5363	0.718	0.2691	0.6478	1.7451	0.2691	#REF!	#REF!	#REF!	#REF!	#REF!	#REF!	0.870028	1.1648	0.436555	1.05091	2.83104	0.436555		#REF!	0.196624	0.250417
7528	DCER(24:1)		Dihydroceramide	53466	DMS-MS	100009614							0.904433	0.902717	0.3909	0.5376	1.1036	0.6212	1.4854	0.5761	0.7198	0.6142	0.5331	1.0914	1.3793	0.4067	#REF!	#REF!	#REF!	#REF!	#REF!	#REF!	0.797371	0.680391	0.590551	1.20902	1.52794	0.450529		#REF!	0.978046	0.587083
7529	DCER(26:0)		Dihydroceramide	53634	DMS-MS	100009782							1	1	1	1	1	1	1	1	1	1	1	1	1	1	#REF!	#REF!	#REF!	#REF!	#REF!	#REF!	1	1	1	1	1	1		#REF!	NA	NA
7530	DCER(26:1)		Dihydroceramide	53281	DMS-MS	100009429							0.865717	0.851117	0.8301	0.8301	0.8301	0.8301	0.8301	0.8301	0.8301	0.8301	0.8301	0.8301	0.8301	0.8301	#REF!	#REF!	#REF!	#REF!	#REF!	#REF!	0.975307	0.975307	0.975307	0.975307	0.975307	0.975307		#REF!	NA	NA
7531	HCER(14:0)		Hexosylceramide	53808	DMS-MS	100009956							0.8702	0.8702	1.5225	0.8702	0.8702	0.8702	0.9667	0.8702	0.8702	0.8702	0.8702	0.8702	1.0333	0.8702	#REF!	#REF!	#REF!	#REF!	#REF!	#REF!	1	1	1	1	1.18743	1		#REF!	0.411369	0.363521
7532	HCER(16:0)		Hexosylceramide	53809	DMS-MS	100009957							0.880733	1.35245	6.9938	2.1519	2.3365	0.5903	4.6634	0.5762	0.5564	0.3872	0.045	1.6331	1.8131	0.0726	#REF!	#REF!	#REF!	#REF!	#REF!	#REF!	0.411402	0.286295	0.0332729	1.20751	1.3406	0.0536804		#REF!	0.066455	0.175205
7533	HCER(18:0)		Hexosylceramide	53638	DMS-MS	100009786							1.3137	0.6987	2.9677	2.2298	2.3693	0.5364	2.4762	0.2894	0.2229	0.5164	0.0929	1	1.7519	0.0673	#REF!	#REF!	#REF!	#REF!	#REF!	#REF!	0.319021	0.739087	0.132961	1.43123	2.50737	0.0963217		#REF!	0.350376	0.335719
7534	HCER(18:1)		Hexosylceramide	53810	DMS-MS	100009958							1.07003	0.62315	1.7659	0.5348	1.5093	0.5348	1.3556	0.5348	0.5348	0.5348	0.5348	0.5348	0.9211	0.5348	#REF!	#REF!	#REF!	#REF!	#REF!	#REF!	0.85822	0.85822	0.85822	0.85822	1.47814	0.85822		#REF!	0.969045	0.584729
7535	HCER(20:0)		Hexosylceramide	53639	DMS-MS	100009787							2.0373	0.73075	2.0836	1.7927	2.3481	0.5901	2.1843	0.4903	0.2767	0.7258	0.139	1.0082	1.4601	0.139	#REF!	#REF!	#REF!	#REF!	#REF!	#REF!	0.378652	0.993226	0.190216	1.37968	1.99808	0.190216		#REF!	0.824531	0.539608
7536	HCER(20:1)		Hexosylceramide	54510	DMS-MS	100010658							0.5606	0.3409	0.3409	0.3409	0.3409	0.3409	0.3409	0.3409	0.3409	0.3409	0.3409	0.3409	0.3409	0.3409	#REF!	#REF!	#REF!	#REF!	#REF!	#REF!	1	1	1	1	1	1		#REF!	NA	NA
7537	HCER(22:0)		Hexosylceramide	53473	DMS-MS	100009621							1.92077	0.891683	3.6326	1.2657	1.7354	0.8397	3.8004	0.972	0.3362	0.5173	0.1641	1.0055	1.2396	0.2268	#REF!	#REF!	#REF!	#REF!	#REF!	#REF!	0.37704	0.580139	0.184034	1.12764	1.39018	0.25435		#REF!	0.269085	0.291842
7538	HCER(22:1)		Hexosylceramide	53474	DMS-MS	100009622							3.35127	0.765067	1.819	1.0687	0.669	0.5045	1.589	0.5045	0.6792	0.5045	0.5045	1.0627	0.6929	0.5045	#REF!	#REF!	#REF!	#REF!	#REF!	#REF!	0.887766	0.65942	0.65942	1.38903	0.905673	0.65942		#REF!	0.00328441	0.0792031
7539	HCER(24:0)		Hexosylceramide	54511	DMS-MS	100010659							2.41443	0.9685	2.7763	1.2091	1.8029	0.7515	3.1358	0.8945	0.3601	0.5661	0.0854	0.9422	1.175	0.1237	#REF!	#REF!	#REF!	#REF!	#REF!	#REF!	0.371812	0.584512	0.0881776	0.972845	1.21322	0.127723		#REF!	0.514957	0.415576
7540	HCER(24:1)		Hexosylceramide	54512	DMS-MS	100010660							1.64983	1.19988	3.5132	1.5734	1.5906	0.6799	3.339	0.6809	0.5947	0.515	0.0834	1.3157	1.3123	0.1072	#REF!	#REF!	#REF!	#REF!	#REF!	#REF!	0.495632	0.429208	0.0695068	1.09652	1.09369	0.089342		#REF!	0.133245	0.213377
7541	HCER(26:0)		Hexosylceramide	53811	DMS-MS	100009959							1.04625	0.8067	0.8067	0.8067	0.8067	0.8067	0.8067	0.8067	0.8067	0.8067	0.8067	0.8067	0.8067	0.8067	#REF!	#REF!	#REF!	#REF!	#REF!	#REF!	1	1	1	1	1	1		#REF!	NA	NA
7542	HCER(26:1)		Hexosylceramide	53988	DMS-MS	100010136							0.867667	0.8412	0.8412	0.8412	0.8412	0.8412	0.8412	0.8412	0.8412	0.8412	0.8412	0.8412	0.8412	0.8412	#REF!	#REF!	#REF!	#REF!	#REF!	#REF!	1	1	1	1	1	1		#REF!	NA	NA
7543	LCER(14:0)		Lactosylceramide	53284	DMS-MS	100009432							0.8755	0.925483	0.8755	0.8755	0.8755	0.8755	0.892	0.8755	0.8755	0.8755	0.8755	1.06	0.8755	0.8755	#REF!	#REF!	#REF!	#REF!	#REF!	#REF!	0.945992	0.945992	0.945992	1.14535	0.945992	0.945992		#REF!	0.50503	0.408865
7544	LCER(16:0)		Lactosylceramide	54141	DMS-MS	100010289							0.93525	1.23877	7.0644	1.2102	1.6247	0.646	4.2141	0.9201	0.6317	2.2653	0.161	1.2124	0.9924	0.236	#REF!	#REF!	#REF!	#REF!	#REF!	#REF!	0.509943	1.82867	0.129968	0.978715	0.801119	0.190512		#REF!	0.124296	0.20734
7545	LCER(18:0)		Lactosylceramide	53475	DMS-MS	100009623							1.97112	0.814167	2.9344	1.1556	1.6578	0.8548	2.0112	0.8219	0.7628	1.2624	0.5983	1.1476	0.7803	0.9245	#REF!	#REF!	#REF!	#REF!	#REF!	#REF!	0.936909	1.55054	0.734862	1.40954	0.958403	1.13552		#REF!	0.158061	0.226702
7546	LCER(18:1)		Lactosylceramide	53476	DMS-MS	100009624							1.4764	0.774533	0.806	0.5243	1.0789	0.8578	0.993	0.5758	0.8111	1.0649	0.8546	0.8143	0.5243	1.0148	#REF!	#REF!	#REF!	#REF!	#REF!	#REF!	1.04721	1.37489	1.10337	1.05134	0.676924	1.31021		#REF!	0.00150501	0.0727612
7547	LCER(20:0)		Lactosylceramide	53477	DMS-MS	100009625							1.1936	1.11227	1.6556	1.255	1.5397	1.066	1.5962	0.8015	0.9049	1.02	0.6179	1.1805	0.9397	1.2658	#REF!	#REF!	#REF!	#REF!	#REF!	#REF!	0.813564	0.917046	0.555532	1.06135	0.844851	1.13804		#REF!	0.164037	0.230956
7548	LCER(20:1)		Lactosylceramide	53812	DMS-MS	100009960							1.2104	0.807017	1.1044	0.9644	1.1041	0.5186	0.5186	0.5399	0.6978	1.2646	1	0.5186	0.5186	1.4342	#REF!	#REF!	#REF!	#REF!	#REF!	#REF!	0.864666	1.56701	1.23913	0.642614	0.642614	1.77716		#REF!	0.0697942	0.175205
7549	LCER(22:0)		Lactosylceramide	53640	DMS-MS	100009788							1.07692	1.22658	2.6284	0.9793	2.1508	1.0533	3.3153	0.6797	0.4686	0.7936	0.2978	1.1681	1.4344	0.3053	#REF!	#REF!	#REF!	#REF!	#REF!	#REF!	0.382037	0.647	0.242788	0.95232	1.16943	0.248903		#REF!	0.0451576	0.17396
7550	LCER(22:1)		Lactosylceramide	54142	DMS-MS	100010290							0.7559	0.678333	0.5067	0.5067	0.5067	0.5067	0.5067	0.5067	0.5067	0.5067	0.5067	0.5067	1	0.5067	#REF!	#REF!	#REF!	#REF!	#REF!	#REF!	0.746978	0.746978	0.746978	0.746978	1.4742	0.746978		#REF!	0.163521	0.230582
7551	LCER(24:0)		Lactosylceramide	53989	DMS-MS	100010137							1.16582	1.2821	2.7406	1.1688	2.1023	1	3.7703	0.6709	0.4712	0.6212	0.4193	1.2875	1.093	0.4193	#REF!	#REF!	#REF!	#REF!	#REF!	#REF!	0.367522	0.484518	0.327042	1.00421	0.852508	0.327042		#REF!	0.0490276	0.17396
7552	LCER(24:1)		Lactosylceramide	53478	DMS-MS	100009626							0.910583	1.36992	3.8084	1.0996	1.6137	0.6346	4.2322	0.7086	0.5639	0.6694	0.2907	1.2278	1.0575	0.2907	#REF!	#REF!	#REF!	#REF!	#REF!	#REF!	0.411631	0.488643	0.212203	0.896259	0.771945	0.212203		#REF!	0.061751	0.175205
7553	LCER(26:0)		Lactosylceramide	53641	DMS-MS	100009789							0.933267	0.8999	0.8999	0.8999	0.8999	0.8999	0.8999	0.8999	0.8999	0.8999	0.8999	0.8999	0.8999	0.8999	#REF!	#REF!	#REF!	#REF!	#REF!	#REF!	1	1	1	1	1	1		#REF!	NA	NA
7554	LCER(26:1)		Lactosylceramide	53642	DMS-MS	100009790							1	1	1	1	1	1	1	1	1	1	1	1	1	1	#REF!	#REF!	#REF!	#REF!	#REF!	#REF!	1	1	1	1	1	1		#REF!	NA	NA
7555	SM(14:0)		Sphingomyelin	54222	DMS-MS	100010370							0.821733	1.05507	1.7061	1.3683	1.1172	0.7569	1.6439	0.6089	0.6567	1.2389	0.3209	1.202	1.0389	0.3328	0.0587131	0.0470882	0.0384469	0.0260477	0.0565726	0.0209545	0.622425	1.17424	0.304151	1.13926	0.984677	0.31543		0.0545843	0.0320236	0.171135
7556	SM(16:0)		Sphingomyelin	54385	DMS-MS	100010533							1.02087	1.24017	1.9085	1.3125	1.3662	0.8105	1.7108	0.7422	0.6246	1.1263	0.2601	1.0407	0.9384	0.2886	0.366014	0.251712	0.262011	0.155438	0.328099	0.14234	0.503642	0.908184	0.20973	0.839161	0.756672	0.232711		0.436397	0.0123776	0.125969
7557	SM(18:0)		Sphingomyelin	54386	DMS-MS	100010534							1.31007	0.901617	1.0171	1.7861	1.6854	1.0377	1.1989	0.6475	0.388	1.8919	0.4545	1.2808	0.8864	0.2987	0.698518	1.22665	1.15749	0.712665	0.823373	0.444686	0.430338	2.09834	0.504094	1.42056	0.983123	0.331294		0.877877	0.942605	0.58031
7558	SM(18:1)		Sphingomyelin	53862	DMS-MS	100010010							1.30008	1.12413	1.749	1.2022	1.3633	1.2713	1.9631	0.976	0.6785	2.0955	0.7072	1.3125	0.7873	0.6196	1.21484	0.835035	0.946933	0.883031	1.36355	0.677919	0.603576	1.8641	0.629107	1.16757	0.700362	0.55118		1.0735	0.489822	0.400486
7559	SM(20:0)		Sphingomyelin	53687	DMS-MS	100009835							0.941817	0.862417	1.4677	1.3087	0.932	1.0043	1.0886	0.8908	0.667	1.2609	0.531	1.1663	0.9877	0.3996	0.456765	0.407282	0.290049	0.31255	0.338785	0.277227	0.773408	1.46205	0.615712	1.35236	1.14527	0.463349		0.358328	0.29888	0.306701
7560	SM(20:1)		Sphingomyelin	53531	DMS-MS	100009679							0.929383	1.00513	1.7573	1.2859	0.9307	1.0831	1.4726	1.0568	0.83	1.6108	0.7337	1.1743	0.9478	0.6425	1.59238	1.16522	0.843356	0.981454	1.3344	0.957622	0.825761	1.60257	0.729953	1.1683	0.942959	0.639219		1.16343	0.0870691	0.181453
7561	SM(22:0)		Sphingomyelin	53347	DMS-MS	100009495							0.938217	0.778967	1.2816	1.1236	1.0765	0.9264	1.0194	0.7197	0.6175	1.1296	0.7308	1.2083	1.3234	0.5347	0.946436	0.829756	0.794973	0.684128	0.752806	0.531484	0.792717	1.45013	0.938166	1.55116	1.69892	0.686422		0.637805	0.642956	0.476338
7562	SM(22:1)		Sphingomyelin	54570	DMS-MS	100010718							0.889483	0.843033	1.4784	1.0624	0.915	0.8502	1.1311	0.8032	0.7817	1.0185	0.6962	1.132	1.1305	0.5608	1.26615	0.909875	0.783636	0.72814	0.968712	0.687887	0.927247	1.20814	0.825827	1.34277	1.34099	0.665217		0.846948	0.487743	0.399567
7563	SM(24:0)		Sphingomyelin	53863	DMS-MS	100010011							0.985483	0.9575	0.6327	1.1791	1.2281	0.9931	0.7	0.711	0.6738	0.9829	0.496	1.2031	1.3721	0.4314	0.399226	0.743998	0.774916	0.626634	0.441691	0.448632	0.703708	1.02653	0.518016	1.2565	1.433	0.450548		0.63751	0.91112	0.571513
7564	SM(24:1)		Sphingomyelin	54028	DMS-MS	100010176							0.887067	1.0563	0.824	1.3531	1.291	0.8704	0.9954	0.5546	0.6156	1.0226	0.3199	1.2425	0.8933	0.3104	1.34392	2.20686	2.10558	1.41959	1.62346	0.904534	0.582789	0.968096	0.30285	1.17628	0.845688	0.293856		2.30335	0.0699353	0.175205
7565	SM(26:0)		Sphingomyelin	54387	DMS-MS	100010535							1.96125	0.836717	0.6134	1.4136	2.3463	1.4425	0.6247	0.5438	0.5246	0.5188	0.1963	1.4536	2.7883	0.2843	0.0511639	0.117909	0.195706	0.120319	0.0521065	0.0453586	0.626974	0.620043	0.234607	1.73727	3.33243	0.33978		0.0845384	0.319119	0.31949
7566	SM(26:1)		Sphingomyelin	53348	DMS-MS	100009496							1.32977	0.907833	0.8616	1.3721	2.0044	0.9954	0.948	0.5569	0.5381	0.7938	0.2235	1.4676	2.2466	0.285	1.29974	2.06984	3.02368	1.50158	1.43008	0.840097	0.59273	0.87439	0.246191	1.6166	2.47468	0.313934		1.66135	0.664797	0.483104
7948	TAG36:0-FA12:0	Triacylglycerol	TAG Ester	54388	DMS-MS	100010536							0.978583	1.35363	0.1553	3.7562	0.1553	0.1553	0.1553	0.1553	0.1553	0.1553	0.1553	0.1553	0.1553	0.1553	0.131942	3.19124	0.131942	0.131942	0.131942	0.131942	0.114728	0.114728	0.114728	0.114728	0.114728	0.114728		5.59431	0.332836	0.327738
7949	TAG38:0-FA12:0		TAG Ester	53532	DMS-MS	100009680							0.7597	0.788117	0.7597	0.7597	0.7597	0.7597	0.7597	0.7597	0.7597	0.7597	0.7597	0.7597	0.7597	0.7597	0.604592	0.604592	0.604592	0.604592	0.604592	0.604592	0.963944	0.963944	0.963944	0.963944	0.963944	0.963944		0.627207	NA	NA
7957	TAG40:0-FA12:0		TAG Ester	53688	DMS-MS	100009836							0.809	0.872667	0.809	0.809	0.809	0.809	0.809	0.809	0.809	0.809	0.809	0.809	0.809	0.809	0.925594	0.925594	0.925594	0.925594	0.925594	0.925594	0.927044	0.927044	0.927044	0.927044	0.927044	0.927044		0.998436	NA	NA
7959	TAG40:0-FA14:0		TAG Ester	53349	DMS-MS	100009497							0.17565	0.0349	0.0349	0.0349	0.0349	0.0349	0.0349	0.9442	0.0349	0.0349	0.0349	1	0.0349	4.2289	0.0503692	0.0503692	0.0503692	0.0503692	0.0503692	1.36271	1	1	1	28.6533	1	121.172		0.0104961	0.266231	0.290113
7960	TAG40:0-FA16:0		TAG Ester	53689	DMS-MS	100009837							0.230617	3.65387	0.0221	0.0221	0.0221	0.0221	0.0559	3.6663	3.5492	6.3946	11.6505	2.2193	0.1012	12.0762	0.0228794	0.0228794	0.0228794	0.0228794	0.0578715	3.7956	0.971355	1.75009	3.18854	0.607384	0.0276967	3.30505		0.400502	0.69474	0.492848
7978	TAG42:0-FA12:0		TAG Ester	53533	DMS-MS	100009681							0.1377	2.36328	0.1377	0.1377	0.1377	0.1377	0.1377	3.7857	4.5956	0.1377	0.1377	0.1377	0.1377	7.8609	0.124885	0.124885	0.124885	0.124885	0.124885	3.43338	1.94458	0.0582664	0.0582664	0.0582664	0.0582664	3.32626		0.737258	0.357297	0.338128
7980	TAG42:0-FA14:0		TAG Ester	54029	DMS-MS	100010177							0.2388	1.11863	0.0292	0.0292	0.0292	0.0292	0.0292	2.4476	4.3228	5.0314	6.9167	2.1444	0.1191	8.5641	0.036616	0.036616	0.036616	0.036616	0.036616	3.06922	3.86436	4.49781	6.18317	1.91698	0.106469	7.65586		0.134256	0.301486	0.308454
7982	TAG42:0-FA16:0		TAG Ester	53690	DMS-MS	100009838							1.77297	2.05457	0.4823	0.7784	0.1448	2.3409	0.0648	3.5631	2.6085	5.1367	8.4955	2.1357	0.0868	10.2752	0.538381	0.868912	0.161637	2.6131	0.0723349	3.97741	1.26961	2.50014	4.13494	1.03949	0.0422474	5.00115		0.588506	0.0970274	0.188712
7984	TAG42:1-FA12:0		TAG Ester	54030	DMS-MS	100010178							0.0403833	0.959183	0.035	0.035	0.035	0.035	0.035	0.035	1.8452	1.476	2.3691	0.8819	0.035	3.3694	0.0328284	0.0328284	0.0328284	0.0328284	0.0328284	0.0328284	1.92372	1.53881	2.46991	0.919428	0.0364894	3.51278		0.0189374	0.139751	0.218107
7986	TAG42:1-FA14:0		TAG Ester	53350	DMS-MS	100009498							0.242933	2.56417	0.0199	0.0199	0.1194	0.0199	0.0199	2.4631	4.1813	4.8596	7.3746	1.6784	0.0775	10.2002	0.0233404	0.0233404	0.140042	0.0233404	0.0233404	2.88893	1.63067	1.8952	2.87602	0.65456	0.0302242	3.97798		0.28219	0.992289	0.589191
7988	TAG42:1-FA16:0		TAG Ester	53351	DMS-MS	100009499							1.20462	3.9546	0.6133	0.5757	0.1124	1.9615	0.0648	4.0112	5.0122	9.5738	13.9821	2.2765	0.1167	15.3464	0.770445	0.723211	0.1412	2.46409	0.0814036	5.03898	1.26744	2.42093	3.53565	0.575659	0.0295099	3.88065		0.787316	0.285662	0.300401
7989	TAG42:1-FA16:1		TAG Ester	53691	DMS-MS	100009839							0.232167	2.10592	0.3523	0.5016	0.0181	0.0181	0.0474	2.7892	3.9544	3.573	6.5468	1.4722	0.076	9.6568	0.546314	0.777835	0.0280678	0.0280678	0.0735036	4.32524	1.87776	1.69665	3.10876	0.699078	0.0360888	4.58556		0.481429	0.748919	0.510278
7990	TAG42:1-FA18:1		TAG Ester	54223	DMS-MS	100010371							1.2363	3.97575	0.6892	0.4619	0.1486	1.8721	0.0625	3.2346	5.5411	10.9097	19.3192	3.1641	0.1496	19.916	0.820362	0.549805	0.17688	2.22838	0.0743944	3.85018	1.39372	2.74406	4.85926	0.79585	0.0376281	5.00937		0.518872	0.135224	0.215191
7991	TAG42:2-FA12:0		TAG Ester	53692	DMS-MS	100009840							0.0812	0.0812	0.0812	0.0812	0.0812	0.0812	0.0812	0.0812	0.0812	0.0812	0.0812	0.0812	0.0812	1.7668	0.0932797	0.0932797	0.0932797	0.0932797	0.0932797	0.0932797	1	1	1	1	1	21.7586		0.0209158	0.363217	0.338856
7995	TAG42:2-FA18:2		TAG Ester	53352	DMS-MS	100009500							1.16605	4.53212	0.0213	0.6767	0.1104	1.661	0.0213	7.1024	4.3947	13.2415	16.2852	3.4066	0.1075	22.0393	0.0283245	0.899867	0.146809	2.20878	0.0283245	9.44468	0.969679	2.9217	3.59329	0.751658	0.0237196	4.86292		0.972096	0.525939	0.421741
8018	TAG44:0-FA12:0		TAG Ester	53693	DMS-MS	100009841							0.623417	2.88457	0.7897	0.0338	0.1882	1.4854	0.1013	2.8984	3.2286	5.8863	7.5081	2.0792	0.0957	9.262	1.02039	0.043674	0.243179	1.91933	0.130893	3.74511	1.11927	2.04062	2.60285	0.720802	0.0331766	3.21088		0.730147	0.867253	0.554175
8020	TAG44:0-FA14:0		TAG Ester	54389	DMS-MS	100010537							0.97495	4.75118	0.5148	0.7679	0.2188	2.2574	0.0848	4.9609	7.9512	9.1311	11.2232	3.365	0.1839	13.7675	0.597354	0.891042	0.253887	2.6194	0.0983987	5.75644	1.67352	1.92186	2.36219	0.708245	0.0387061	2.8977		1.06398	0.918286	0.572481
8022	TAG44:0-FA16:0		TAG Ester	54031	DMS-MS	100010179							1.2044	2.50845	0.4701	0.5363	0.169	1.7786	0.0605	2.8187	3.3997	5.2979	7.3542	2.2868	0.1098	8.0891	0.665487	0.759202	0.239241	2.51784	0.0856455	3.99023	1.3553	2.11202	2.93177	0.911639	0.0437721	3.22474		0.780552	0.15762	0.226422
8024	TAG44:0-FA18:0		TAG Ester	53534	DMS-MS	100009682							1.05223	0.28235	0.0355	0.0355	0.0355	1.1623	0.0407	0.0355	1.0855	1.9457	2.9052	0.62	0.0355	2.8421	0.0355	0.0355	0.0355	1.1623	0.0407	0.0355	3.84452	6.89109	10.2894	2.19586	0.12573	10.0659		0.0402545	0.0259151	0.169564
8026	TAG44:1-FA12:0		TAG Ester	54390	DMS-MS	100010538							0.85415	4.11278	0.4862	0.6238	0.1604	1.985	0.0564	2.5242	6.2289	6.5503	9.4534	2.5118	0.1283	12.1216	0.563286	0.722702	0.185831	2.29972	0.0653421	2.9244	1.51452	1.59267	2.29854	0.61073	0.0311954	2.9473		0.751675	0.595377	0.453452
8028	TAG44:1-FA14:0		TAG Ester	53694	DMS-MS	100009842							0.65245	5.75542	0.3317	0.7852	0.1665	2.5743	0.0539	4.0427	10.5563	8.4626	13.4518	3.4128	0.1771	17.0825	0.443667	1.05025	0.222703	3.44327	0.0720942	5.40733	1.83415	1.47037	2.33724	0.592972	0.030771	2.96807		1.15224	0.670418	0.485433
8029	TAG44:1-FA14:1		TAG Ester	54032	DMS-MS	100010180							0.0939833	1.96233	0.015	0.015	0.015	1.6343	0.015	2.7501	3.3548	2.5989	3.392	1	0.0711	4.7511	0.0195754	0.0195754	0.0195754	2.13281	0.0195754	3.58896	1.7096	1.32439	1.72855	0.509597	0.0362324	2.42115		0.750379	0.254596	0.283644
8031	TAG44:1-FA16:0		TAG Ester	53864	DMS-MS	100010012							1.91965	3.0569	0.7171	0.8559	0.1796	2.5992	0.0574	2.9277	4.3979	5.9966	9.7581	2.1584	0.1076	14.9246	0.767965	0.91661	0.192339	2.78356	0.0614715	3.13537	1.43868	1.96166	3.19216	0.706075	0.0351991	4.88227		0.643197	0.11553	0.201221
8032	TAG44:1-FA16:1		TAG Ester	54571	DMS-MS	100010719							0.8394	4.99002	0.5244	0.707	0.1704	2.1449	0.0625	4.1159	8.5662	6.4776	10.5288	2.3634	0.1726	14.8073	0.510431	0.688167	0.165861	2.08776	0.0608351	4.00626	1.71667	1.29811	2.10997	0.473626	0.0345891	2.96738		0.874304	0.912231	0.571513
8034	TAG44:1-FA18:1		TAG Ester	53695	DMS-MS	100009843							1.9478	2.57225	0.6856	0.9902	0.2145	2.4772	0.0652	1.7532	3.7231	5.5136	9.5733	2.4433	0.111	15.3361	0.720711	1.04091	0.225485	2.60406	0.068539	1.84298	1.44741	2.14349	3.72176	0.949869	0.0431529	5.96213		0.455759	0.0896062	0.181453
8036	TAG44:2-FA12:0		TAG Ester	53535	DMS-MS	100009683							0.652733	3.18228	0.3637	0.022	0.1376	1.9422	0.0511	2.8685	5.2722	5.4683	5.9337	1.7713	0.0893	10.5628	0.51635	0.0312337	0.195353	2.75737	0.0725474	4.07245	1.65673	1.71836	1.8646	0.556613	0.0280616	3.31925		0.836135	0.87107	0.556228
8038	TAG44:2-FA14:0		TAG Ester	54224	DMS-MS	100010372							0.631567	2.95675	0.3477	0.6888	0.1498	1.8701	0.0288	2.4338	4.05	4.3382	5.1235	1.4064	0.0863	10.2303	0.355752	0.704751	0.153269	1.91341	0.0294669	2.49016	1.36975	1.46722	1.73281	0.475657	0.0291875	3.45998		0.661636	0.967283	0.584729
8040	TAG44:2-FA16:0		TAG Ester	53353	DMS-MS	100009501							1.39003	2.51133	0.5866	0.8895	0.2009	3.0041	0.0637	4.2059	2.8812	5.7095	8.7532	1.9223	0.0926	11.3577	0.723542	1.09715	0.2478	3.70541	0.0785708	5.18777	1.14728	2.27349	3.48548	0.76545	0.0368728	4.52258		0.902634	0.291362	0.303293
8041	TAG44:2-FA16:1		TAG Ester	54033	DMS-MS	100010181							1.05235	3.02288	0.4912	0.5918	0.0977	1.6446	0.037	2.911	6.3043	4.3057	7.7234	1.8188	0.0835	11.7382	0.599622	0.722427	0.119265	2.00761	0.0451669	3.55354	2.08553	1.42437	2.55498	0.601677	0.0276226	3.88311		0.666298	0.264435	0.28884
8042	TAG44:2-FA18:1		TAG Ester	54225	DMS-MS	100010373							1.69963	4.31295	0.7342	0.7254	0.1285	2.6628	0.0674	2.7038	7.9568	8.6933	15.6567	3.0744	0.1275	23.2024	0.817595	0.807795	0.143096	2.96526	0.0750557	3.01091	1.84486	2.01563	3.63016	0.71283	0.0295621	5.37971		0.57444	0.11047	0.197127
8043	TAG44:2-FA18:2		TAG Ester	54226	DMS-MS	100010374							1.43227	2.93275	0.5197	0.751	0.2252	3.4704	0.0616	4.1906	3.5316	6.7406	9.6921	2.4858	0.1065	13.7862	0.508637	0.735013	0.220406	3.39653	0.0602887	4.10139	1.20419	2.29839	3.30478	0.8476	0.036314	4.70078		0.728069	0.284139	0.300041
8049	TAG44:3-FA18:2		TAG Ester	54391	DMS-MS	100010539							1.28378	3.78158	0.5643	0.7257	0.1579	2.6939	0.0515	5.1801	4.7948	8.4209	11.5574	2.1867	0.1124	17.1522	0.541988	0.697007	0.151657	2.58739	0.0494637	4.97528	1.26793	2.22682	3.05623	0.57825	0.029723	4.53572		0.769819	0.452807	0.382168
8060	TAG45:0-FA14:0		TAG Ester	54392	DMS-MS	100010540							0.243633	1.60327	0.0276	0.0276	0.1725	0.0276	0.0276	2.9004	3.1158	2.4866	3.4746	1.1912	0.0893	2.97	0.0311935	0.0311935	0.194959	0.0311935	0.0311935	3.27803	1.94341	1.55096	2.1672	0.742983	0.0556988	1.85247		0.432802	0.704198	0.494259
8061	TAG45:0-FA15:0		TAG Ester	53865	DMS-MS	100010013							0.36825	2.45457	0.0321	0.0321	0.0321	0.0321	0.0321	3.5078	2.522	3.6684	4.6666	1.3357	0.0897	4.9716	0.0413296	0.0413296	0.0413296	0.0413296	0.0413296	4.51638	1.02747	1.49452	1.90119	0.544169	0.0365441	2.02545		0.671902	0.772163	0.520123
8062	TAG45:0-FA16:0		TAG Ester	54572	DMS-MS	100010720							3.14903	1.73355	0.7618	0.7537	0.1345	2.1356	0.0515	2.7754	2.3026	2.9403	4.2227	1.6489	0.0602	8.1664	0.7618	0.7537	0.1345	2.1356	0.0515	2.7754	1.32826	1.69611	2.43587	0.95117	0.0347264	4.7108		0.592681	0.0699614	0.175205
8069	TAG45:1-FA15:0		TAG Ester	53536	DMS-MS	100009684							0.0136667	0.850367	0.0079	0.0079	0.0079	0.0079	0.0079	1.1376	1.3533	0.0079	1.7903	0.0079	0.0079	1.6449	0.0182434	0.0182434	0.0182434	0.0182434	0.0182434	2.62705	1.59143	0.00929011	2.10533	0.00929011	0.00929011	1.93434		0.480346	0.375143	0.34543
8070	TAG45:1-FA16:0		TAG Ester	54573	DMS-MS	100010721							3.65755	1.72848	0.8329	1.1671	0.096	3.5699	0.0621	3.9739	2.4139	3.1999	6.7643	1.4913	0.0349	11.7241	0.84739	1.1874	0.0976702	3.63201	0.0631804	4.04304	1.39654	1.85128	3.91343	0.86278	0.0201911	6.78288		0.665719	0.102443	0.190742
8073	TAG45:1-FA18:1		TAG Ester	53537	DMS-MS	100009685							3.10658	1.17212	0.7828	1.5069	0.0713	2.9853	0.0468	1.5173	1.48	2.0227	4.8867	1	0.0338	8.7234	1.45115	2.79349	0.132176	5.53414	0.0867577	2.81277	1.26267	1.72568	4.16912	0.853157	0.0288367	7.44243		0.827449	0.107662	0.195148
8087	TAG46:0-FA12:0		TAG Ester	53538	DMS-MS	100009686							1.28925	2.22828	0.5251	0.9827	0.2879	1.9904	0.0677	1.2492	3.448	4.81	7.6128	2.3342	0.0973	8.0135	0.575662	1.07733	0.315622	2.18206	0.0742189	1.36949	1.54738	2.15861	3.41644	1.04753	0.0436659	3.59627		0.473702	0.0703939	0.175205
8089	TAG46:0-FA14:0		TAG Ester	54393	DMS-MS	100010541							0.970083	3.253	0.565	0.7323	0.2493	2.0042	0.0826	3.7287	4.3511	6.3881	9.229	2.5257	0.145	7.619	0.621289	0.805256	0.274137	2.20387	0.0908291	4.10018	1.33757	1.96376	2.83707	0.776422	0.0445742	2.34215		0.870346	0.703126	0.494259
8091	TAG46:0-FA16:0		TAG Ester	53354	DMS-MS	100009502							1.05617	3.07033	0.5802	0.772	0.2464	2.1469	0.0827	3.8839	4.2247	6.1566	9.0266	2.4785	0.1435	7.4358	0.328038	0.436479	0.139311	1.21383	0.0467575	2.19591	1.37597	2.00519	2.93994	0.807241	0.0467376	2.42182		0.454347	0.605757	0.457273
8093	TAG46:0-FA18:0		TAG Ester	53539	DMS-MS	100009687							1.5327	1.66462	0.6238	0.8987	0.1955	2.1182	0.0565	1.6781	2.6437	3.3055	7.0166	2.0068	0.0897	6.612	0.508858	0.733104	0.159477	1.7279	0.0460892	1.36889	1.58817	1.98574	4.21514	1.20556	0.0538863	3.97209		0.34901	0.065912	0.175205
8095	TAG46:1-FA12:0		TAG Ester	53866	DMS-MS	100010014							1.37072	2.8347	0.6686	0.9209	0.2689	2.5183	0.0722	1.7967	4.5739	6.0735	9.1775	2.4716	0.1187	9.4214	0.877083	1.20805	0.352748	3.30356	0.0947134	2.35695	1.61354	2.14255	3.23756	0.871909	0.0418739	3.3236		0.729506	0.103178	0.190742
8097	TAG46:1-FA14:0		TAG Ester	53696	DMS-MS	100009844							1.03122	5.02318	0.5816	0.8639	0.2034	2.4778	0.0676	4.2752	8.838	8.1836	12.3603	3.112	0.1929	14.0507	0.638209	0.947986	0.223198	2.71897	0.0741797	4.69132	1.75944	1.62917	2.46065	0.619527	0.0384019	2.79717		0.998872	0.82159	0.538832
8098	TAG46:1-FA14:1		TAG Ester	54227	DMS-MS	100010375							1.28607	4.15508	0.5978	0.7539	0.2168	2.6264	0.0997	5.3531	7.0995	6.3255	8.031	2.0839	0.1739	9.8742	1.03479	1.305	0.375281	4.5463	0.172581	9.26623	1.70863	1.52235	1.93281	0.50153	0.0418523	2.37641		2.06594	0.899828	0.568287
8100	TAG46:1-FA16:0		TAG Ester	53355	DMS-MS	100009503							1.0946	4.2946	0.595	0.8533	0.2083	2.4702	0.0702	4.0183	7.234	6.9233	11.0637	2.7356	0.1675	11.9459	0.887265	1.27244	0.310617	3.68357	0.104682	5.9921	1.68444	1.61209	2.57619	0.636986	0.0390025	2.78161		1.313	0.684965	0.488548
8101	TAG46:1-FA16:1		TAG Ester	53540	DMS-MS	100009688							1.13465	5.88528	0.7189	0.9329	0.2105	2.8942	0.0805	6.1992	10.6254	8.6142	14.0381	3.2563	0.2206	15.5833	1.21292	1.57398	0.355154	4.88308	0.135819	10.4593	1.80542	1.46368	2.38529	0.553295	0.0374833	2.64784		2.0938	0.88742	0.562766
8103	TAG46:1-FA18:0		TAG Ester	54034	DMS-MS	100010182							1.73635	1.30535	0.5612	1.0716	0.1751	2.3347	0.0497	0.8683	2.3962	3.3811	5.9843	1.5543	0.063	6.6175	0.767173	1.4649	0.239366	3.19159	0.067941	1.18699	1.83568	2.59019	4.58444	1.19072	0.0482629	5.06952		0.451599	0.0483288	0.17396
8104	TAG46:1-FA18:1		TAG Ester	54394	DMS-MS	100010542							1.40257	2.74402	0.5499	0.9244	0.2409	2.598	0.0595	1.7814	5.1241	5.7973	8.5975	2.4281	0.1125	10.3549	0.5499	0.9244	0.2409	2.598	0.0595	1.7814	1.86737	2.11271	3.13318	0.884871	0.0409983	3.77363		0.520971	0.0888527	0.181453
8108	TAG46:2-FA12:0		TAG Ester	54035	DMS-MS	100010183							1.50592	3.45655	0.5847	0.9355	0.249	3.0241	0.0643	3.2602	5.7444	6.5443	9.2636	2.5059	0.1202	12.2835	0.806891	1.291	0.343622	4.17328	0.0887345	4.4991	1.66189	1.8933	2.68001	0.724971	0.0347746	3.55369		1.062	0.216322	0.262106
8110	TAG46:2-FA14:0		TAG Ester	54036	DMS-MS	100010184							1.1127	5.43663	0.5055	0.9383	0.1977	3.1887	0.057	5.3253	9.7343	8.2351	11.3414	2.7511	0.1829	14.9532	0.997435	1.85142	0.390095	6.29183	0.11247	10.5077	1.7905	1.51474	2.08611	0.50603	0.0336421	2.75045		2.32114	0.927345	0.573959
8111	TAG46:2-FA14:1		TAG Ester	54574	DMS-MS	100010722							1.14283	5.78022	0.7932	0.9576	0.1472	2.8999	0.0671	5.6514	12.287	6.7737	10.6583	2.4175	0.1913	13.01	0.991376	1.19685	0.183977	3.62442	0.0838645	7.06337	2.1257	1.17188	1.84393	0.418237	0.0330956	2.25078		1.67574	0.800005	0.530246
8113	TAG46:2-FA16:0		TAG Ester	53356	DMS-MS	100009504							1.2703	2.97183	0.5214	0.7386	0.1887	2.5632	0.0566	3.4469	4.4444	5.3043	6.5458	1.6712	0.1039	9.136	0.292735	0.41468	0.105944	1.43908	0.0317775	1.93523	1.49551	1.78486	2.20261	0.562346	0.0349616	3.0742		0.460916	0.417268	0.365212
8114	TAG46:2-FA16:1		TAG Ester	53867	DMS-MS	100010015							1.03253	7.00482	0.6471	1.0428	0.1575	3.2903	0.0586	6.1316	15.0136	8.4794	13.1416	3.0265	0.2245	18.4729	0.222717	0.358908	0.0542078	1.13244	0.0201688	2.11035	2.14333	1.21051	1.87608	0.43206	0.0320494	2.63717		0.467976	0.682944	0.488241
8116	TAG46:2-FA18:1		TAG Ester	54037	DMS-MS	100010185							1.95158	2.61225	0.7515	0.9851	0.2005	3.07	0.053	1.6887	5.7681	5.0962	8.3497	2.2792	0.0887	13.4316	0.543332	0.712223	0.144961	2.2196	0.0383188	1.22092	2.2081	1.95089	3.19636	0.872505	0.0339554	5.14177		0.364034	0.0748551	0.176735
8117	TAG46:2-FA18:2		TAG Ester	53868	DMS-MS	100010016							1.43093	3.11802	0.5141	0.9873	0.2533	3.209	0.0611	3.9335	3.7075	7.1348	7.5679	2.2442	0.1073	11.4115	0.50043	0.961047	0.246565	3.12367	0.0594753	3.82891	1.18906	2.28825	2.42715	0.719752	0.0344129	3.65986		0.845095	0.36782	0.341764
8120	TAG46:3-FA12:0		TAG Ester	54038	DMS-MS	100010186							1.5	4.33857	0.5227	0.8951	0.2253	3.5147	0.0498	5.5226	6.0703	7.1161	9.95	2.497	0.1082	16.0322	0.303683	0.520044	0.130897	2.04201	0.0289333	3.20858	1.39915	1.6402	2.29338	0.575536	0.0249391	3.69528		0.647469	0.619852	0.464788
8122	TAG46:3-FA14:0		TAG Ester	54395	DMS-MS	100010543							0.496317	3.38102	0.019	0.7955	0.1856	3.0626	0.0385	6.6962	5.0086	4.8327	5.8837	1.5504	0.0835	10.8726	0.0185248	0.775606	0.180958	2.98601	0.0375372	6.52874	1.48139	1.42936	1.74022	0.45856	0.0246967	3.21578		1.26076	0.360348	0.338856
8123	TAG46:3-FA14:1		TAG Ester	53357	DMS-MS	100009505							0.607233	4.07567	0.6171	0.6994	0.0219	2.433	0.0486	5.4916	10.4296	4.6446	5.4607	1.324	0.1042	9.9028	0.642177	0.727821	0.0227899	2.53187	0.050575	5.71476	2.55899	1.13959	1.33983	0.324855	0.0255664	2.42974		1.23936	0.432919	0.370113
8125	TAG46:3-FA16:0		TAG Ester	54396	DMS-MS	100010544							1.71105	2.3021	0.8869	1.0413	0.1932	3.0469	0.0872	6.2035	2.9454	4.5768	5.3462	1.3013	0.0621	7.9605	0.962522	1.13009	0.209673	3.3067	0.0946352	6.73245	1.27944	1.9881	2.32231	0.565266	0.0269754	3.45793		1.29004	0.532634	0.425677
8126	TAG46:3-FA16:1		TAG Ester	54397	DMS-MS	100010545							1.00343	4.2558	0.5892	0.8935	0.1188	2.4983	0.0456	4.652	8.7386	5.225	7.02	1.6961	0.1306	12.4762	0.530484	0.80446	0.106961	2.24934	0.0410558	4.18841	2.05334	1.22774	1.64951	0.398538	0.0306875	2.93158		0.955293	0.928066	0.573959
8127	TAG46:3-FA18:1		TAG Ester	54575	DMS-MS	100010723							1.63767	2.01245	0.6006	1.0464	0.1661	3.1158	0.0552	2.4288	3.192	4.698	6.2067	1.5141	0.0657	10.709	0.573411	0.999029	0.158581	2.97475	0.0527011	2.31885	1.58613	2.33447	3.08415	0.752367	0.0326468	5.32137		0.539794	0.130844	0.212239
8128	TAG46:3-FA18:2		TAG Ester	54576	DMS-MS	100010724							1.37883	2.39807	0.585	0.8971	0.1672	3.0411	0.0397	3.2047	3.8643	5.3412	6.4531	1.5575	0.0674	11.0648	0.545167	0.836015	0.155815	2.83403	0.0369968	2.98649	1.61142	2.22729	2.69096	0.649482	0.028106	4.61405		0.625523	0.232901	0.271119
8129	TAG46:3-FA18:3		TAG Ester	54039	DMS-MS	100010187							0.0269333	1.28645	0.0229	0.0229	0.0229	0.0229	0.0229	2.1015	1.0599	2.4749	2.6051	0.7658	0.0443	4.5131	0.0222597	0.0222597	0.0222597	0.0222597	0.0222597	2.04274	0.823895	1.92382	2.02503	0.595282	0.0344359	3.50818		0.241737	0.385659	0.350212
8136	TAG46:4-FA18:2		TAG Ester	53869	DMS-MS	100010017							1.47233	2.08205	0.5715	0.8186	0.1698	3.3308	0.0411	4.512	2.9506	5.9932	5.2165	1.368	0.0665	10.7818	0.597835	0.856321	0.177624	3.48428	0.0429939	4.71991	1.41716	2.87851	2.50546	0.657045	0.0319397	5.17845		0.779801	0.285128	0.300401
8154	TAG47:0-FA14:0		TAG Ester	54228	DMS-MS	100010376							0.751317	3.18243	0.4731	0.7773	0.2711	2.2286	0.062	3.0452	3.2564	4.3771	8.3674	1.2229	0.1601	6.3855	0.337394	0.554337	0.193337	1.58934	0.0442157	2.1717	1.02324	1.37539	2.62925	0.384266	0.0503074	2.00648		0.654755	0.72791	0.502067
8155	TAG47:0-FA15:0		TAG Ester	54229	DMS-MS	100010377							1.43457	2.49355	0.7786	0.6733	0.2478	2.4773	0.0985	4.9599	2.9785	3.8962	5.6034	1.3402	0.1012	4.9461	0.774765	0.669984	0.246579	2.4651	0.0980148	4.93547	1.19448	1.56251	2.24716	0.537467	0.0405847	1.98356		1.21467	0.774984	0.52067
8156	TAG47:0-FA16:0		TAG Ester	53697	DMS-MS	100009845							1.41635	2.50665	0.717	0.845	0.322	2.3215	0.11	3.9084	3.0354	3.9253	5.5916	1.4492	0.1296	5.4912	0.613756	0.723325	0.275634	1.98722	0.0941606	3.34561	1.21094	1.56595	2.23071	0.578142	0.0517025	2.19065		0.899287	0.556181	0.437345
8157	TAG47:0-FA17:0		TAG Ester	53870	DMS-MS	100010018							0.834083	2.0488	0.7759	1.0824	0.2153	1.8668	0.1348	2.9272	2.3605	3.7384	4.9903	1.6663	0.1103	4.4259	0.760612	1.06107	0.211058	1.83002	0.132144	2.86952	1.15214	1.82468	2.43572	0.813305	0.0538364	2.16024		0.813329	0.990982	0.589191
8162	TAG47:1-FA14:0		TAG Ester	53871	DMS-MS	100010019							1.15143	3.31317	0.5472	0.8695	0.2435	2.7803	0.0801	2.9109	4.5319	5.253	8.0216	1.7037	0.1325	8.5967	0.365482	0.580751	0.162637	1.857	0.0534999	1.94423	1.36785	1.58549	2.42113	0.514221	0.039992	2.59471		0.582351	0.586004	0.449286
8164	TAG47:1-FA15:0		TAG Ester	53358	DMS-MS	100009506							1.15763	3.16342	0.6545	0.8058	0.1612	2.7979	0.0634	4.7168	5.1708	4.7446	7.0954	1.544	0.0966	7.5571	0.691312	0.851122	0.170267	2.95527	0.0669659	4.9821	1.63456	1.49983	2.24295	0.48808	0.0305366	2.3889		1.17286	0.942504	0.58031
8165	TAG47:1-FA16:0		TAG Ester	54398	DMS-MS	100010546							1.44085	3.19473	0.8175	0.7875	0.2437	2.6461	0.0789	4.6539	5.1951	5.1381	7.83	1.808	0.1024	8.7055	0.832796	0.802234	0.24826	2.69561	0.0803762	4.74098	1.62615	1.6083	2.45091	0.565931	0.0320528	2.72495		1.04351	0.526261	0.421741
8166	TAG47:1-FA16:1		TAG Ester	54577	DMS-MS	100010725							1.03198	3.30957	0.6611	0.8729	0.2114	2.5293	0.0737	4.2234	5.5248	3.9969	5.9277	1.5517	0.1053	7.8517	0.15828	0.208989	0.0506131	0.605562	0.0176452	1.01116	1.66934	1.20768	1.79108	0.468853	0.0318169	2.37243		0.272138	0.866895	0.554175
8167	TAG47:1-FA17:0		TAG Ester	53872	DMS-MS	100010020							1.73102	3.00747	0.6676	1.0743	0.2621	3.1565	0.0777	4.6193	3.6569	4.905	6.0541	1.5892	0.1042	6.9692	0.423094	0.680842	0.166107	2.00044	0.0492427	2.9275	1.21594	1.63094	2.01302	0.528418	0.0346471	2.3173		0.807107	0.557659	0.437629
8169	TAG47:1-FA18:1		TAG Ester	54578	DMS-MS	100010726							3.51147	2.15922	0.889	1	0.1893	2.816	0.0734	2.5038	4.1456	4.0061	5.479	1.6212	0.0729	10.1674	0.779528	0.87686	0.16599	2.46924	0.0643615	2.19548	1.91996	1.85535	2.53749	0.750828	0.0337622	4.70884		0.554915	0.0582051	0.17396
8173	TAG47:2-FA14:0		TAG Ester	53541	DMS-MS	100009689							1.4695	3.17702	0.6624	0.8534	0.2166	2.7991	0.0647	3.7399	4.7934	5.0287	7.0787	1.3618	0.1301	9.3604	0.398748	0.513725	0.130388	1.68499	0.0389477	2.25132	1.50877	1.58284	2.2281	0.428641	0.0409504	2.94629		0.574446	0.423023	0.36736
8175	TAG47:2-FA15:0		TAG Ester	54230	DMS-MS	100010378							0.939833	3.45498	0.5314	0.8378	0.1492	2.9439	0.0604	5.4419	5.9989	3.7266	4.4708	1.1685	0.0894	9.4175	0.56568	0.891846	0.158825	3.13381	0.0642964	5.79295	1.7363	1.07862	1.29401	0.338207	0.0258757	2.72577		1.4735	0.591827	0.451886
8177	TAG47:2-FA16:1		TAG Ester	54579	DMS-MS	100010727							1.28282	4.29192	0.6483	0.8574	0.1244	2.1517	0.058	4.9811	9.918	4.3412	7.5515	1.439	0.1213	11.0016	0.722353	0.955338	0.13861	2.39748	0.0646252	5.55008	2.31086	1.01148	1.75947	0.335281	0.0282624	2.56333		1.22723	0.802905	0.531499
8179	TAG47:2-FA18:1		TAG Ester	53698	DMS-MS	100009846							3.90417	1.76783	0.937	1.063	0.1037	3.6555	0.0425	2.4154	3.421	2.6968	5.8064	1.4639	0.0402	11.417	1.34087	1.52118	0.148397	5.23111	0.0608185	3.4565	1.93514	1.52548	3.28447	0.828076	0.0227397	6.45819		0.836686	0.0871488	0.181453
8180	TAG47:2-FA18:2		TAG Ester	54580	DMS-MS	100010728							1.65147	2.24328	0.5457	1.083	0.1903	2.6907	0.0475	4.7268	3.263	4.0364	6.0829	1.2249	0.077	10.1087	0.353807	0.702168	0.123382	1.74453	0.0307968	3.06464	1.45456	1.79933	2.71161	0.54603	0.0343247	4.50621		0.544633	0.286241	0.300401
8204	TAG48:0-FA14:0		TAG Ester	54399	DMS-MS	100010547							1.28775	2.33802	0.7179	1.0192	0.2932	2.2094	0.0857	1.8879	4.0194	4.832	7.8457	2.4063	0.1281	7.4245	0.468552	0.665202	0.191363	1.44201	0.0559339	1.23218	1.71915	2.06671	3.35571	1.02921	0.05479	3.17555		0.355688	0.0987104	0.189739
8206	TAG48:0-FA16:0		TAG Ester	54581	DMS-MS	100010729							1.35757	2.22973	0.8479	0.9365	0.3353	1.9018	0.1018	3.27	2.7645	4.4518	6.8927	1.9753	0.1186	4.6359	0.801771	0.885551	0.317059	1.79834	0.0962617	3.0921	1.23983	1.99656	3.09127	0.885891	0.0531902	2.07913		0.748039	0.273255	0.293598
8208	TAG48:0-FA18:0		TAG Ester	54400	DMS-MS	100010548							1.22258	1.82505	0.5861	0.8441	0.3014	2.2674	0.0801	1.6731	3.0034	4.0904	6.4112	1.9979	0.1125	5.4573	0.580613	0.836198	0.298578	2.24617	0.0793501	1.65744	1.64565	2.24125	3.51289	1.09471	0.0616421	2.99022		0.493519	0.0898667	0.181453
8211	TAG48:1-FA12:0		TAG Ester	53542	DMS-MS	100009690							1.44078	1.78138	0.5189	1.2643	0.2909	3.0878	0.0574	0.9279	3.3784	4.1471	6.9771	2.0683	0.0804	7.0097	0.397198	0.967774	0.222673	2.36359	0.0439375	0.710273	1.8965	2.32802	3.91668	1.16106	0.0451335	3.93498		0.354263	0.0672268	0.175205
8213	TAG48:1-FA14:0		TAG Ester	54040	DMS-MS	100010188							1.35722	2.60873	0.6751	0.9449	0.2895	2.3722	0.0718	2.0386	4.7101	5.3272	8.3534	2.3768	0.1259	8.2648	0.837437	1.17211	0.359114	2.94263	0.0890653	2.52881	1.80551	2.04206	3.20209	0.911094	0.048261	3.16813		0.709409	0.10147	0.190681
8214	TAG48:1-FA14:1		TAG Ester	54231	DMS-MS	100010379							1.439	2.47035	0.7029	0.8746	0.1754	2.4737	0.0715	2.627	5.6299	3.8482	6.6522	1.6177	0.1057	7.506	0.61915	0.770392	0.154501	2.17896	0.0629808	2.31399	2.27899	1.55775	2.69282	0.654846	0.0427875	3.03844		0.594214	0.151582	0.22404
8216	TAG48:1-FA16:0		TAG Ester	53359	DMS-MS	100009507							1.14698	2.94147	0.7833	0.8442	0.2384	2.2048	0.0753	3.1274	5.0322	5.1079	8.4542	2.126	0.1373	7.7728	0.455866	0.491309	0.138744	1.28315	0.0438232	1.82009	1.71078	1.73651	2.87414	0.722769	0.0466774	2.64249		0.434894	0.380779	0.34715
8217	TAG48:1-FA16:1		TAG Ester	53543	DMS-MS	100009691							1.15218	3.39042	0.7588	0.9026	0.2345	2.269	0.0796	4.2024	5.7768	5.3242	8.7627	2.0937	0.1493	8.2203	0.776544	0.923707	0.239984	2.32206	0.0814614	4.30067	1.70386	1.57037	2.58455	0.617535	0.0440359	2.42457		0.966406	0.705703	0.49453
8219	TAG48:1-FA18:0		TAG Ester	53699	DMS-MS	100009847							1.16662	2.07703	0.5126	0.8853	0.2324	2.3827	0.0521	1.6391	4.2983	4.5493	7.737	1.9873	0.1035	7.4805	0.591632	1.02179	0.268231	2.75006	0.0601327	1.89181	2.06944	2.19029	3.72502	0.956797	0.0498307	3.60153		0.522807	0.0925545	0.183673
8220	TAG48:1-FA18:1		TAG Ester	54401	DMS-MS	100010549							1.30967	2.64133	0.68	0.9474	0.2787	2.483	0.0658	2.0909	4.9058	5.5192	8.2385	2.437	0.1251	8.3696	0.203601	0.283664	0.0834464	0.743443	0.0197014	0.626043	1.85732	2.08955	3.11907	0.92264	0.0473624	3.1687		0.174918	0.114708	0.201187
8225	TAG48:2-FA12:0		TAG Ester	54582	DMS-MS	100010730							1.48907	2.16705	0.5832	1.096	0.2486	3.0184	0.0461	1.155	4.4953	4.6925	7.168	2.2174	0.0838	8.9175	0.787629	1.48018	0.335742	4.07644	0.0622594	1.55986	2.07439	2.16539	3.30772	1.02323	0.0386701	4.11504		0.652454	0.0689406	0.175205
8227	TAG48:2-FA14:0		TAG Ester	54583	DMS-MS	100010731							1.3818	3.04753	0.651	0.9654	0.2169	2.7269	0.0631	3.7172	5.5348	6.0635	8.1823	2.2519	0.1253	10.0024	0.66871	0.991663	0.2228	2.80108	0.0648166	3.81832	1.81616	1.98964	2.68489	0.738925	0.0411152	3.28213		0.811855	0.280104	0.296747
8228	TAG48:2-FA14:1		TAG Ester	53700	DMS-MS	100009848							1.33542	2.63878	0.7185	0.8061	0.1666	2.408	0.0692	2.374	6.1828	4.1757	6.4543	1.688	0.096	7.7596	0.655167	0.735046	0.151915	2.19574	0.0631003	2.16474	2.34305	1.58243	2.44594	0.639689	0.0363804	2.9406		0.597283	0.166188	0.231857
8230	TAG48:2-FA16:0		TAG Ester	53360	DMS-MS	100009508							1.17195	3.22573	0.6239	0.8587	0.208	2.4735	0.0603	4.1173	5.538	5.3343	7.6735	1.8635	0.1272	8.9458	0.990344	1.36305	0.330167	3.92629	0.0957168	6.53557	1.71682	1.65367	2.37884	0.577698	0.0394329	2.77326		1.44875	0.640723	0.475405
8231	TAG48:2-FA16:1		TAG Ester	54402	DMS-MS	100010550							1.19627	5.14897	0.8361	1.0514	0.1926	3.0096	0.0699	5.1964	11.4222	6.8211	11.9373	2.7094	0.1944	12.296	0.815283	1.02522	0.187805	2.93467	0.0681597	5.06702	2.21835	1.32475	2.31839	0.526203	0.0377551	2.38805		1.14576	0.974682	0.586593
8233	TAG48:2-FA18:0		TAG Ester	53701	DMS-MS	100009849							1.54937	1.75988	0.5033	0.9182	0.2518	2.5512	0.0435	2.0736	3.1535	3.9118	4.7523	1.6189	0.0793	5.9963	0.401446	0.732382	0.200843	2.03491	0.0346968	1.65396	1.79188	2.22276	2.70035	0.919891	0.0450598	3.40721		0.456225	0.0746382	0.176735
8234	TAG48:2-FA18:1		TAG Ester	54584	DMS-MS	100010732							1.2317	3.10717	0.5706	0.9368	0.2011	2.7037	0.0539	2.1252	7.4489	5.3211	8.5542	2.3189	0.121	10.2239	0.350707	0.575784	0.123602	1.66177	0.0331285	1.30621	2.39733	1.71252	2.75305	0.746307	0.0389422	3.29043		0.370359	0.16762	0.232797
8235	TAG48:2-FA18:2		TAG Ester	54041	DMS-MS	100010189							1.40027	2.52232	0.6265	0.9784	0.2552	2.7091	0.0619	4.5847	3.1574	5.7712	6.7263	1.8794	0.1128	8.142	0.939586	1.46734	0.382733	4.06294	0.0928338	6.87585	1.25179	2.28806	2.66672	0.745109	0.0447208	3.22798		1.3518	0.417117	0.365212
8240	TAG48:3-FA12:0		TAG Ester	53370	DMS-MS	100009518							1.64245	2.49688	0.508	1.0788	0.2466	3.1986	0.0452	2.2714	3.6149	5.309	6.2382	1.9168	0.0792	8.485	0.493028	1.04701	0.239332	3.10433	0.0438679	2.20446	1.44776	2.12625	2.49839	0.767677	0.0317195	3.39824		0.694449	0.136633	0.215641
8242	TAG48:3-FA14:0		TAG Ester	53551	DMS-MS	100009699							1.30415	3.7845	0.6302	0.9435	0.1995	3.0754	0.0511	6.2743	6.067	6.6556	8.3457	2.0509	0.1272	12.3883	0.35136	0.526037	0.111229	1.71465	0.0284902	3.49816	1.60312	1.75865	2.20523	0.541921	0.0336108	3.27343		0.661635	0.878222	0.557765
8243	TAG48:3-FA14:1		TAG Ester	53883	DMS-MS	100010031							1.43368	3.43862	0.7809	0.9537	0.1803	2.9658	0.0646	5.1107	7.9084	4.7232	6.6842	1.6334	0.1111	9.8479	0.915672	1.11829	0.211417	3.47765	0.075749	5.99273	2.29988	1.37358	1.94386	0.475017	0.0323095	2.86391		1.31184	0.657008	0.482357
8245	TAG48:3-FA16:0		TAG Ester	53884	DMS-MS	100010032							1.31342	3.3911	0.6763	0.9919	0.1945	3.2043	0.0676	7.6932	4.7633	6.032	7.5582	1.8278	0.1285	10.1614	0.63986	0.938455	0.18402	3.03165	0.0639576	7.27868	1.40465	1.77877	2.22883	0.538999	0.0378933	2.99649		1.35067	0.901811	0.568759
8246	TAG48:3-FA16:1		TAG Ester	54408	DMS-MS	100010556							1.21398	5.73277	0.7235	1.1012	0.1662	3.5282	0.0483	6.8106	13.7137	6.5448	10.6563	2.3191	0.1851	16.0408	0.538092	0.819	0.123609	2.62404	0.0359224	5.06528	2.39216	1.14165	1.85884	0.404534	0.0322881	2.79809		1.06704	0.800436	0.530246
8248	TAG48:3-FA18:1		TAG Ester	54585	DMS-MS	100010733							1.65732	2.72138	0.6176	0.9894	0.1988	3.0611	0.0494	2.5614	5.774	4.9314	6.2732	1.8944	0.0863	9.8721	0.383075	0.613689	0.123308	1.89869	0.030641	1.58874	2.12172	1.81209	2.30515	0.696117	0.0317118	3.6276		0.437793	0.130995	0.212239
8249	TAG48:3-FA18:2		TAG Ester	54232	DMS-MS	100010380							1.50933	3.53727	0.6257	1.0826	0.2243	3.5898	0.0522	5.44	5.9252	6.4135	7.9225	2.1396	0.1166	12.3007	0.641623	1.11015	0.230008	3.68115	0.0535284	5.57844	1.67508	1.81312	2.23972	0.604874	0.0329633	3.47746		1.14748	0.595255	0.453452
8250	TAG48:3-FA18:3		TAG Ester	53544	DMS-MS	100009692							1.18662	3.87585	0.6127	1.1007	0.2424	3.1032	0.072	9.8932	2.8266	8.3172	9.4932	2.4013	0.1529	11.1543	0.460579	0.827418	0.182217	2.33274	0.0541238	7.43691	0.729285	2.1459	2.44932	0.619554	0.0394494	2.8779		1.27451	0.662749	0.483104
8254	TAG48:4-FA12:0		TAG Ester	53702	DMS-MS	100009850							1.50018	2.4255	0.451	1.0856	0.2429	3.2521	0.0407	4.8176	2.1173	5.8982	5.4531	1.5722	0.0787	9.8932	0.234172	0.563675	0.126121	1.68858	0.0211326	2.50144	0.872933	2.43175	2.24824	0.648196	0.0324469	4.07883		0.497956	0.459696	0.383413
8255	TAG48:4-FA14:0		TAG Ester	53361	DMS-MS	100009509							1.4727	4.20307	0.6491	1	0.1838	2.8997	0.0457	12.8169	4.2506	7.8559	9.4679	2.3034	0.1267	15.4298	0.538814	0.830094	0.152571	2.40702	0.0379353	10.6392	1.01131	1.86909	2.25262	0.548028	0.0301447	3.67108		1.55673	0.780825	0.522138
8256	TAG48:4-FA14:1		TAG Ester	54403	DMS-MS	100010551							1.28065	3.64903	0.7389	0.9087	0.1339	3.1809	0.0684	7.553	7.841	4.3207	6.0393	1.5754	0.1052	10.8006	0.790831	0.972565	0.143311	3.40446	0.0732073	8.08384	2.14879	1.18407	1.65504	0.431731	0.0288296	2.95985		1.60177	0.824416	0.539608
8257	TAG48:4-FA16:0		TAG Ester	53362	DMS-MS	100009510							1.58197	2.56148	0.8158	1.0435	0.1475	2.9279	0.0697	11.2158	3.1978	4.3537	4.6406	0.827	0.0966	7.0911	0.575838	0.736562	0.104114	2.06668	0.0491983	7.91676	1.24842	1.69968	1.81168	0.32286	0.0377125	2.76836		1.45133	0.749814	0.510278
8258	TAG48:4-FA16:1		TAG Ester	53873	DMS-MS	100010021							1.29872	5.14592	0.7146	1.1211	0.1412	3.8507	0.0567	11.0683	9.6273	6.3642	7.8515	1.9433	0.1429	15.0423	0.477004	0.748348	0.0942527	2.57039	0.0378479	7.38823	1.87086	1.23675	1.52577	0.377639	0.0277696	2.92315		1.42127	0.569073	0.442196
8259	TAG48:4-FA18:1		TAG Ester	54404	DMS-MS	100010552							2.1114	1.93173	1.0521	1.144	0.192	3.6402	0.0745	3.4336	3.2019	3.4282	4.7984	0.9455	0.0617	6.836	0.571359	0.621266	0.104268	1.97687	0.0404583	1.86467	1.65753	1.77468	2.48399	0.489457	0.0319402	3.53879		0.519115	0.171415	0.233835
8260	TAG48:4-FA18:2		TAG Ester	54042	DMS-MS	100010190							1.7329	2.8709	0.5629	1.17	0.2217	3.45	0.0496	5.9169	4.0689	5.3616	4.7457	1.4216	0.0812	10.8428	0.536675	1.11549	0.211371	3.28926	0.0472891	5.64123	1.41729	1.86757	1.65304	0.495176	0.0282838	3.77679		1.17354	0.57259	0.443057
8261	TAG48:4-FA18:3		TAG Ester	53703	DMS-MS	100009851							1.10108	4.50875	0.463	0.836	0.1856	3.3839	0.0475	9.8217	5.0085	7.3396	8.8018	2.0842	0.1451	14.6988	0.68279	1.23286	0.273706	4.99027	0.0700487	14.4841	1.11084	1.62786	1.95216	0.462257	0.0321819	3.26006		2.57346	0.600219	0.455632
8264	TAG48:4-FA20:4		TAG Ester	53874	DMS-MS	100010022							0.684183	0.720867	0.134	0.134	0.134	0.134	0.134	15.541	0.134	0.134	0.134	0.134	0.134	0.134	0.107814	0.107814	0.107814	0.107814	0.107814	12.504	0.185887	0.185887	0.185887	0.185887	0.185887	0.185887		11.6944	0.362052	0.338856
8271	TAG48:5-FA18:2		TAG Ester	54043	DMS-MS	100010191							1.73127	1.76025	0.9434	1.1397	0.1921	3.5821	0.0372	7.9467	1.8339	3.6011	3.4209	0.8313	0.0632	6.1775	0.620726	0.749885	0.126395	2.3569	0.0244764	5.22867	1.04184	2.04579	1.94342	0.472262	0.035904	3.50944		1.00645	0.846695	0.545582
8272	TAG48:5-FA18:3		TAG Ester	53875	DMS-MS	100010023							0.5188	1.90377	0.0392	0.0392	0.0392	1.9796	0.0392	4.924	2.6006	3.6806	3.8468	1.1026	0.055	5.5848	0.0337902	0.0337902	0.0337902	1.7064	0.0337902	4.24446	1.36603	1.93333	2.02063	0.579168	0.0288901	2.93355		0.686787	0.644566	0.476338
8294	TAG49:0-FA15:0		TAG Ester	53704	DMS-MS	100009852							1.56545	1.66417	0.806	0.9283	0.2604	2.0798	0.0838	2.3396	2.8613	3.2826	4.2983	1.3203	0.0816	4.2445	0.684695	0.788588	0.221209	1.76678	0.0711879	1.98748	1.71936	1.97252	2.58285	0.79337	0.0490336	2.55053		0.57097	0.0900564	0.181453
8295	TAG49:0-FA16:0		TAG Ester	54044	DMS-MS	100010192							1.6078	2.65298	0.8533	0.9124	0.4083	2.2463	0.1176	3.2377	2.5984	4.7202	8.7183	1.3737	0.1317	5.0242	0.56995	0.609425	0.272718	1.50038	0.0785492	2.16258	0.979426	1.7792	3.28622	0.517794	0.0496422	1.89379		0.610575	0.306926	0.312976
8296	TAG49:0-FA17:0		TAG Ester	54405	DMS-MS	100010553							1.50197	2.7055	0.9391	0.8729	0.3062	2.1651	0.1088	4.2423	2.8557	4.607	9.8252	1.3987	0.0884	5.4026	0.599234	0.556992	0.195384	1.38154	0.0694247	2.70699	1.05552	1.70283	3.63157	0.516984	0.0326742	1.9969		0.616526	0.447059	0.378705
8297	TAG49:0-FA18:0		TAG Ester	53363	DMS-MS	100009511							1.41003	1.46177	0.5148	0.7401	0.377	1.7706	0.1255	1.5458	1.4206	2.2454	3.3879	0.8769	0.1595	2.6999	0.471594	0.677985	0.345359	1.622	0.114967	1.41606	0.971838	1.53609	2.31767	0.599891	0.109115	1.84701		0.629668	0.141808	0.220012
8302	TAG49:1-FA14:0		TAG Ester	54233	DMS-MS	100010381							1.36075	3.08587	0.5638	0.865	0.2341	2.6929	0.0616	1.9242	3.838	5.0984	9.7652	1.3177	0.1023	7.7227	0.206392	0.316653	0.0856976	0.985796	0.0225501	0.704397	1.24373	1.65218	3.16449	0.427011	0.0331511	2.5026		0.25728	0.242965	0.278156
8304	TAG49:1-FA15:0		TAG Ester	53364	DMS-MS	100009512							1.5897	1.96043	0.8859	0.9819	0.2662	2.7019	0.0653	2.3396	3.0604	3.2196	5.225	1.169	0.0738	5.3695	0.649669	0.72007	0.195216	1.98142	0.0478874	1.71573	1.56108	1.64229	2.66523	0.596297	0.0376447	2.73894		0.574583	0.171212	0.233835
8305	TAG49:1-FA16:0		TAG Ester	53876	DMS-MS	100010024							1.5602	2.22167	0.9429	1.0571	0.346	2.5014	0.0996	2.3537	3.2133	3.5271	5.8784	1.3532	0.1108	5.6327	0.979874	1.09855	0.359568	2.59949	0.103506	2.446	1.44635	1.58759	2.64594	0.609092	0.0498725	2.53535		0.854949	0.194157	0.248305
8306	TAG49:1-FA16:1		TAG Ester	53545	DMS-MS	100009693							1.2461	3.81223	0.8494	0.9667	0.2689	2.4966	0.071	3.6845	5.6171	5.0227	11.7051	1.394	0.0999	7.5857	0.245504	0.279408	0.0777209	0.721599	0.0205213	1.06494	1.47344	1.31752	3.0704	0.365665	0.0262051	1.98983		0.29233	0.697145	0.493793
8307	TAG49:1-FA17:0		TAG Ester	54045	DMS-MS	100010193							1.36557	3.53638	0.8262	0.9368	0.2298	2.6232	0.0707	4.0535	4.5153	5.2729	11.853	1.2917	0.0825	8.1628	0.48312	0.547794	0.134375	1.53392	0.0413418	2.37028	1.27681	1.49104	3.35173	0.36526	0.0233289	2.30823		0.579695	0.570548	0.442571
8309	TAG49:1-FA18:1		TAG Ester	53365	DMS-MS	100009513							1.39573	1.98815	0.776	1.0394	0.335	2.4624	0.0819	1.9984	3.398	3.4652	4.5214	1.3003	0.0979	5.0452	0.646281	0.86565	0.279	2.05078	0.0682093	1.66434	1.70913	1.74293	2.27417	0.654025	0.0492418	2.53764		0.621632	0.179906	0.238356
8316	TAG49:2-FA14:0		TAG Ester	54046	DMS-MS	100010194							1.34753	2.44223	0.6867	0.9301	0.2456	2.5179	0.0619	2.2119	3.8222	4.4703	6.0692	1.4113	0.1001	6.9383	0.3943	0.534059	0.141022	1.44577	0.0355427	1.27006	1.56504	1.83041	2.4851	0.577873	0.0409871	2.84097		0.409058	0.207068	0.257439
8318	TAG49:2-FA15:0		TAG Ester	53877	DMS-MS	100010025							1.67132	2.32242	0.8888	0.9897	0.2331	2.9161	0.0599	4.1558	3.7719	3.6345	4.6574	1.1436	0.0813	5.8759	0.79284	0.882846	0.207933	2.60126	0.0534328	3.70712	1.62413	1.56496	2.00541	0.492418	0.0350066	2.53008		0.999203	0.431582	0.369814
8319	TAG49:2-FA16:0		TAG Ester	54234	DMS-MS	100010382							1.5196	2.30898	0.823	1.0454	0.3012	2.6694	0.0803	3.9196	3.527	3.9584	4.9232	1.2016	0.1066	6.3216	0.618061	0.78508	0.226197	2.00468	0.0603041	2.94356	1.52751	1.71435	2.13219	0.520402	0.0461675	2.73783		0.76487	0.426725	0.367857
8320	TAG49:2-FA16:1		TAG Ester	53546	DMS-MS	100009694							1.26548	3.131	0.8624	0.9189	0.2174	2.8372	0.0742	3.0986	6.3078	4.0579	6.2979	1.4671	0.1141	7.7256	0.681174	0.725801	0.171715	2.24099	0.0586075	2.44745	2.01463	1.29604	2.01147	0.468572	0.036442	2.46745		0.762633	0.582898	0.447741
8321	TAG49:2-FA17:0		TAG Ester	53366	DMS-MS	100009514							1.26008	3.25593	0.7364	1	0.242	2.7836	0.0613	4.1889	5.3356	5.002	8.3968	1.1653	0.098	7.7125	0.712622	0.967711	0.234186	2.69372	0.0593207	4.05364	1.63873	1.53627	2.57892	0.3579	0.0300989	2.36875		1.02474	0.745541	0.509269
8323	TAG49:2-FA18:1		TAG Ester	54406	DMS-MS	100010554							1.35103	2.27713	0.7788	1.0229	0.229	2.6269	0.0655	2.1193	5.5186	3.5694	4.7128	1.3229	0.0881	6.7323	0.994044	1.30561	0.292291	3.35292	0.0836028	2.70503	2.42349	1.5675	2.06962	0.58095	0.038689	2.95648		0.906272	0.200856	0.251974
8324	TAG49:2-FA18:2		TAG Ester	54047	DMS-MS	100010195							1.53967	2.03367	0.7264	1.0182	0.3204	2.5446	0.0739	4.3148	2.3358	3.4843	4.0147	1.1473	0.0936	5.1178	0.564816	0.791706	0.249128	1.97857	0.0574613	3.35499	1.14857	1.71331	1.97412	0.564153	0.0460252	2.51654		0.878679	0.551522	0.434796
8331	TAG49:3-FA15:0		TAG Ester	53547	DMS-MS	100009695							1.50102	2.62428	0.903	1.0977	0.2039	3.2958	0.0532	6.8112	4.3318	4.2871	4.7254	1.0901	0.0818	7.248	0.424462	0.515982	0.0958447	1.54922	0.0250071	3.20165	1.65066	1.63363	1.80064	0.41539	0.0311704	2.7619		0.700819	0.991195	0.589191
8332	TAG49:3-FA16:0		TAG Ester	53367	DMS-MS	100009515							1.70637	2.42818	0.7308	0.9474	0.1989	2.7359	0.0738	6.4958	2.9065	5.1933	5.0164	0.9962	0.0933	6.8373	0.832947	1.07982	0.226701	3.11831	0.0841153	7.40375	1.19699	2.13876	2.06591	0.410266	0.0384238	2.81581		1.47074	0.643606	0.476338
8333	TAG49:3-FA16:1		TAG Ester	53368	DMS-MS	100009516							1.30712	3.23707	0.8271	1.022	0.1895	2.8091	0.0547	5.1359	6.3059	4.0819	5.2877	1.2141	0.1049	8.3035	0.939335	1.16068	0.215215	3.19029	0.0621226	5.83283	1.94803	1.26099	1.63349	0.375062	0.0324059	2.56513		1.45877	0.97596	0.586614
8336	TAG49:3-FA18:2		TAG Ester	53705	DMS-MS	100009853							1.57242	2.4974	0.6317	1.0576	0.235	3.3182	0.0675	4.8601	4.0735	4.0918	4.1797	1.2152	0.0859	7.0238	0.415237	0.695195	0.154473	2.18116	0.0443699	3.1947	1.6311	1.63842	1.67362	0.486586	0.0343958	2.81244		0.807719	0.651616	0.480006
8337	TAG49:3-FA18:3		TAG Ester	54407	DMS-MS	100010555							0.292883	2.32987	0.665	0.0361	0.2129	1.7487	0.0361	6.0115	0.0361	4.1013	3.3069	1.3223	0.0879	5.3966	0.40851	0.0221763	0.130785	1.07423	0.0221763	3.69287	0.0154944	1.76032	1.41935	0.567543	0.0377275	2.31627		0.874776	0.280376	0.296747
8368	TAG50:0-FA14:0		TAG Ester	53706	DMS-MS	100009854							1.49032	1.58518	0.6339	1.2162	0.4391	2.4537	0.0697	0.7838	2.6909	3.815	7.1996	1.9892	0.125	5.164	0.361973	0.694482	0.250738	1.40113	0.0398005	0.44757	1.69753	2.40666	4.54181	1.25487	0.0788552	3.25767		0.241414	0.0572978	0.17396
8370	TAG50:0-FA16:0		TAG Ester	54235	DMS-MS	100010383							1.49023	1.48065	0.8901	0.9817	0.3838	1.9316	0.0981	1.3834	2.1788	3.1394	5.4458	1.5485	0.0973	3.6837	1.11483	1.22956	0.480701	2.41929	0.122868	1.73268	1.47152	2.12029	3.67798	1.04582	0.0657144	2.48789		0.653214	0.0705388	0.175205
8372	TAG50:0-FA18:0		TAG Ester	53878	DMS-MS	100010026							1.25712	1.22195	0.7006	0.9131	0.3747	1.6892	0.1026	1.2811	1.6096	2.693	4.5671	1.3181	0.0935	2.7323	0.420087	0.547504	0.224674	1.01286	0.06152	0.768161	1.31724	2.20385	3.73755	1.07869	0.076517	2.23602		0.284962	0.0864986	0.181453
8378	TAG50:1-FA14:0		TAG Ester	54048	DMS-MS	100010196							1.42742	1.68633	0.6338	1.0781	0.3314	2.4297	0.0639	0.9219	3.4329	3.8521	6.8115	1.9435	0.1015	5.8331	0.335951	0.571456	0.175661	1.28788	0.0338708	0.488661	2.03572	2.28431	4.03924	1.1525	0.0601898	3.45904		0.222046	0.0506018	0.17396
8381	TAG50:1-FA16:0		TAG Ester	53879	DMS-MS	100010027							1.63423	1.71628	0.9833	1.0167	0.3746	2.1033	0.0862	1.5482	2.6239	3.5391	6.0823	1.6953	0.105	4.6598	0.583971	0.603807	0.222471	1.24913	0.0511932	0.919459	1.52883	2.06207	3.54388	0.987774	0.0611787	2.71505		0.333067	0.0667815	0.175205
8382	TAG50:1-FA16:1		TAG Ester	54236	DMS-MS	100010384							1.45787	2.42898	0.8912	1.0161	0.2868	2.3195	0.0797	1.9895	4.8671	4.1408	7.4126	1.8387	0.127	7.1683	0.400978	0.457174	0.12904	1.04361	0.0358594	0.895136	2.00376	1.70475	3.05173	0.756983	0.0522852	2.95115		0.281522	0.107019	0.19475
8384	TAG50:1-FA18:0		TAG Ester	54237	DMS-MS	100010385							1.27627	1.83475	0.6922	0.9779	0.3199	2.321	0.0773	1.396	3.27	3.7942	6.6375	1.7588	0.1068	5.6937	0.395818	0.559189	0.182927	1.32721	0.0442022	0.798269	1.78226	2.06797	3.61766	0.958605	0.0582096	3.10326		0.285436	0.0889196	0.181453
8385	TAG50:1-FA18:1		TAG Ester	53880	DMS-MS	100010028							1.6059	1.78682	0.9602	1.0374	0.3766	2.2338	0.0871	1.637	2.8823	3.6467	6.2023	1.7222	0.1087	4.7988	0.619065	0.668837	0.242803	1.44019	0.0561555	1.05541	1.61309	2.04089	3.47115	0.963837	0.0608344	2.68567		0.376768	0.0715431	0.175205
8388	TAG50:1-FA20:1		TAG Ester	53548	DMS-MS	100009696							1.10965	2.15923	0.4796	0.8293	0.2417	2.5344	0.0616	2.3497	3.2071	4.1266	5.223	1.9703	0.1328	8.2283	0.138044	0.238698	0.0695686	0.729478	0.0177304	0.676315	1.4853	1.91114	2.41891	0.9125	0.0615033	3.81075		0.176398	0.261318	0.286454
8392	TAG50:2-FA14:0		TAG Ester	53549	DMS-MS	100009697							1.50785	2.122	0.665	1.0283	0.3046	2.6947	0.0603	1.199	4.7473	4.425	7.1651	2.0438	0.1069	7.6884	0.507395	0.784592	0.23241	2.05606	0.0460089	0.914837	2.23718	2.0853	3.37658	0.963148	0.050377	3.62319		0.368141	0.0576977	0.17396
8393	TAG50:2-FA14:1		TAG Ester	53369	DMS-MS	100009517							1.81073	1.94968	0.8833	0.9462	0.2378	2.6369	0.0778	1.4122	5.663	3.8653	6.0021	1.9241	0.0816	6.5918	0.630373	0.675262	0.169708	1.88184	0.0555225	1.00783	2.90457	1.98253	3.0785	0.986878	0.041853	3.38096		0.357206	0.0390477	0.17396
8395	TAG50:2-FA16:0		TAG Ester	54586	DMS-MS	100010734							1.72938	2.08672	0.9819	1.0181	0.3278	2.5149	0.0861	3.0209	3.4411	4.3389	6.2997	1.6223	0.1151	6.3687	0.951899	0.986993	0.317784	2.43806	0.0834693	2.9286	1.64905	2.0793	3.01895	0.777441	0.0551584	3.05202		0.724875	0.113429	0.199704
8396	TAG50:2-FA16:1		TAG Ester	53881	DMS-MS	100010029							1.44068	2.53245	0.9578	0.9539	0.2535	2.3812	0.0759	2.0839	5.5764	4.1998	7.4591	1.7935	0.1208	7.7257	0.585488	0.583104	0.154961	1.45559	0.0463965	1.27386	2.20198	1.65839	2.94541	0.708207	0.0477008	3.05068		0.386285	0.116257	0.201221
8398	TAG50:2-FA18:0		TAG Ester	54049	DMS-MS	100010197							1.3817	1.98223	0.6409	1.0466	0.3173	2.6776	0.0672	1.9749	3.7922	4.1616	6.2118	1.6582	0.1035	6.4214	0.473414	0.773093	0.23438	1.97786	0.0496387	1.4588	1.91309	2.09945	3.13374	0.836531	0.0522138	3.23948		0.440568	0.10977	0.197022
8399	TAG50:2-FA18:1		TAG Ester	53550	DMS-MS	100009698							1.3913	2.36995	0.837	0.9406	0.2569	2.367	0.0694	1.7267	5.27	4.1583	7.2186	1.8569	0.1139	7.4826	0.946583	1.06375	0.290534	2.6769	0.0784861	1.95277	2.22368	1.75459	3.04589	0.783519	0.0480601	3.15728		0.63643	0.0929835	0.184127
8400	TAG50:2-FA18:2		TAG Ester	53882	DMS-MS	100010030							1.6998	1.69997	0.8541	0.979	0.3482	2.401	0.079	3.3677	1.9065	3.8815	4.7991	1.3249	0.0953	5.0502	0.338266	0.387733	0.137905	0.950916	0.031288	1.33378	1.12149	2.28328	2.82306	0.779368	0.0560599	2.97076		0.31691	0.160486	0.22911
8404	TAG50:2-FA20:2		TAG Ester	54238	DMS-MS	100010386							1.05305	1.67598	0.5535	1.1636	0.3184	3.2386	0.102	1.8351	2.0219	3.4924	4.3974	1.2366	0.1394	4.3215	0.517113	1.0871	0.297468	3.02569	0.0952944	1.71446	1.2064	2.08379	2.62377	0.737835	0.0831751	2.57849		0.723376	0.525514	0.421741
8407	TAG50:3-FA14:0		TAG Ester	53707	DMS-MS	100009855							1.6131	2.16287	0.6451	1.0679	0.263	3.0364	0.0551	2.5787	3.4728	4.875	5.7752	1.658	0.0947	8.1646	0.356836	0.590707	0.145478	1.67958	0.0304785	1.4264	1.60565	2.25395	2.67016	0.766575	0.0437845	3.7749		0.38052	0.131837	0.212239
8408	TAG50:3-FA14:1		TAG Ester	54587	DMS-MS	100010735							1.70237	2.31162	0.8918	0.8713	0.1943	2.7393	0.067	1.5969	7.1512	3.7062	5.8565	1.5838	0.0875	7.8877	0.53914	0.526746	0.117465	1.65605	0.040505	0.96541	3.09359	1.60329	2.53351	0.685148	0.0378523	3.4122		0.338329	0.0734058	0.176735
8410	TAG50:3-FA16:0		TAG Ester	54050	DMS-MS	100010198							1.6338	2.66657	0.9053	0.9947	0.2589	2.8662	0.0661	4.9619	3.7348	4.7434	6.259	1.5454	0.1155	8.3137	0.892126	0.980225	0.255133	2.82449	0.0651381	4.8897	1.4006	1.77884	2.34721	0.579547	0.0433141	3.11775		1.06901	0.450007	0.380502
8411	TAG50:3-FA16:1		TAG Ester	53885	DMS-MS	100010033							1.49133	3.01503	0.883	0.9901	0.2155	2.7759	0.0634	3.8711	6.7148	4.4345	6.9934	1.6594	0.1216	9.2769	0.779634	0.874196	0.190273	2.45095	0.0559782	3.41794	2.22711	1.4708	2.31951	0.550375	0.0403312	3.07688		0.802165	0.33965	0.331515
8413	TAG50:3-FA18:0		TAG Ester	53708	DMS-MS	100009856							1.5212	2.05443	0.6803	1.1226	0.2647	2.8784	0.0653	2.9474	3.599	4.5451	5.9025	1.5795	0.0923	7.8395	0.671979	1.10887	0.261462	2.84319	0.0645013	2.91135	1.75182	2.21234	2.87306	0.768825	0.0449272	3.81589		0.685571	0.151849	0.224075
8414	TAG50:3-FA18:1		TAG Ester	54409	DMS-MS	100010557							1.4638	2.82003	0.7405	1.0098	0.2296	2.8214	0.0557	2.588	6.778	4.5284	6.7122	1.7658	0.115	9.389	0.60566	0.825922	0.187791	2.30764	0.0455574	2.11674	2.40352	1.6058	2.38018	0.626163	0.0407797	3.32939		0.58631	0.176491	0.236656
8415	TAG50:3-FA18:2		TAG Ester	53886	DMS-MS	100010034							1.60245	2.5433	0.7998	1.0242	0.2546	2.7964	0.0627	4.1216	3.7469	4.6169	5.9667	1.5705	0.1101	8.1428	0.605076	0.774843	0.192614	2.11557	0.0474347	3.11813	1.47324	1.81532	2.34605	0.617505	0.0432902	3.20167		0.721662	0.327402	0.324862
8416	TAG50:3-FA18:3		TAG Ester	54051	DMS-MS	100010199							1.49002	3.06042	0.935	0.9298	0.2904	2.7249	0.0852	8.1241	2.2848	6.8731	8.2415	1.9943	0.1526	8.5111	0.568983	0.565818	0.176719	1.6582	0.0518474	4.94382	0.746565	2.24581	2.69293	0.651643	0.0498625	2.78103		0.868841	0.948964	0.581619
8420	TAG50:3-FA20:3		TAG Ester	54588	DMS-MS	100010736							1.084	2.8113	0.8469	1.086	0.3098	3.8109	0.2074	6.4629	2.699	4.616	5.1944	0.0458	0.1965	5.5102	0.459739	0.589534	0.168175	2.06874	0.112587	3.50838	0.960054	1.64195	1.84769	0.0162914	0.0698965	1.96002		1.06331	0.417616	0.365212
8423	TAG50:4-FA14:0		TAG Ester	54589	DMS-MS	100010737							1.55355	2.15468	0.4353	1.0564	0.2215	3.1595	0.0441	5.8082	2.4025	5.3189	4.5361	1.405	0.0807	8.1659	0.281997	0.684359	0.143493	2.04679	0.028569	3.76268	1.11501	2.46853	2.10523	0.652068	0.0374533	3.78984		0.683301	0.520919	0.419285
8424	TAG50:4-FA14:1		TAG Ester	53887	DMS-MS	100010035							1.9572	2.30583	0.859	1.0802	0.1829	3.274	0.0545	3.6863	5.597	4.0066	4.515	1.2995	0.0798	8.0832	0.750262	0.943461	0.159747	2.85956	0.047601	3.21966	2.42732	1.73759	1.95808	0.563571	0.0346079	3.50554		0.780338	0.164818	0.231185
8426	TAG50:4-FA16:0		TAG Ester	53371	DMS-MS	100009519							1.77845	3.19312	0.8618	1.1314	0.2432	3.4434	0.0765	10.0166	3.5904	6.2497	7.1869	1.6958	0.1221	10.0639	0.835185	1.09646	0.235689	3.33706	0.0741375	9.70726	1.12442	1.95724	2.25075	0.53108	0.0382385	3.15175		1.68839	0.976139	0.586614
8427	TAG50:4-FA16:1		TAG Ester	54052	DMS-MS	100010200							1.65615	3.59732	0.8553	1.1668	0.1647	3.4587	0.0553	7.5692	8.0968	5.1181	6.7046	1.6323	0.1216	12.3624	0.572995	0.78168	0.110338	2.3171	0.0370474	5.07087	2.25079	1.42275	1.86378	0.453755	0.033803	3.43656		0.939606	0.788869	0.525608
8429	TAG50:4-FA18:1		TAG Ester	53888	DMS-MS	100010036							1.58547	2.51788	0.7181	1.055	0.1724	3.0937	0.0512	4.3687	5.3792	4.5958	5.3316	1.522	0.0801	9.4566	0.273095	0.40122	0.0655642	1.17654	0.0194715	1.66143	2.1364	1.82526	2.11749	0.604476	0.0318124	3.75577		0.343544	0.309406	0.31453
8430	TAG50:4-FA18:2		TAG Ester	54053	DMS-MS	100010201							1.7673	3.03193	0.6974	1.2088	0.2151	3.6482	0.0497	7.1719	5.4904	5.494	5.7205	1.6009	0.1018	10.4362	0.587763	1.01877	0.181284	3.07467	0.0418867	6.04442	1.81086	1.81205	1.88675	0.528013	0.0335759	3.44209		1.15089	0.665265	0.483104
8431	TAG50:4-FA18:3		TAG Ester	53552	DMS-MS	100009700							1.44005	4.10863	0.8444	1.079	0.2287	3.6266	0.0644	10.7112	4.7241	8.5052	9.3194	2.1566	0.1716	13.2734	0.846347	1.08149	0.229227	3.63496	0.0645485	10.7359	1.1498	2.07008	2.26825	0.524895	0.0417657	3.23061		1.78694	0.778957	0.521415
8434	TAG50:4-FA20:3		TAG Ester	54239	DMS-MS	100010387							0.537983	1.00727	0.0184	0.0184	0.1084	2.2993	0.0184	3.2771	1.8144	1.975	2.3818	0.8293	0.0518	4.1557	0.015803	0.015803	0.0931005	1.97478	0.015803	2.81457	1.80131	1.96075	2.36462	0.823317	0.0514263	4.12572		0.443048	0.95259	0.581619
8435	TAG50:4-FA20:4		TAG Ester	54054	DMS-MS	100010202							0.838617	2.18068	1.3736	1.5686	0.2725	3.7844	0.4965	17.7467	2.2533	2.6917	0.041	1.2033	0.1589	3.0467	1.76771	2.01866	0.350685	4.87021	0.638955	22.8386	1.0333	1.23434	0.0188014	0.5518	0.0728671	1.39713		7.54016	0.248195	0.279729
8438	TAG50:5-FA14:0		TAG Ester	54240	DMS-MS	100010388							1.3411	2.97657	0.5692	1.1017	0.1993	3.6117	0.0526	11.6029	2.9147	8.279	6.7612	1.7069	0.1134	11.7124	0.5692	1.1017	0.1993	3.6117	0.0526	11.6029	0.979215	2.78139	2.27148	0.573446	0.0380976	3.93487		1.62002	0.813016	0.535115
8439	TAG50:5-FA14:1		TAG Ester	53889	DMS-MS	100010037							1.97087	2.51562	0.9654	1.1629	0.2013	3.7625	0.0709	9.4134	4.481	4.9398	4.2156	1.3392	0.0742	9.1249	1.73988	2.09582	0.36279	6.78091	0.127778	16.9652	1.78127	1.96365	1.67577	0.532355	0.0294957	3.6273		2.9212	0.760403	0.514838
8441	TAG50:5-FA16:0		TAG Ester	54410	DMS-MS	100010558							1.89787	1.33218	1.0492	1.4262	0.2459	3.9382	0.1115	19.1479	2.4199	4.6761	4.5711	0.9261	0.0832	5.5519	1.1436	1.55453	0.268026	4.29255	0.121533	20.8708	1.81649	3.5101	3.43128	0.695175	0.0624539	4.16752		2.06468	0.998063	0.591007
8442	TAG50:5-FA16:1		TAG Ester	53890	DMS-MS	100010038							1.61352	4.35665	0.8295	1.1404	0.1609	3.8973	0.0553	14.1785	7.2866	6.4019	7.0439	1.6171	0.1311	14.0755	1.79313	2.4652	0.347817	8.42477	0.119542	30.6496	1.67252	1.46945	1.61682	0.37118	0.0300919	3.23081		5.21996	0.650898	0.479861
8444	TAG50:5-FA18:1		TAG Ester	53553	DMS-MS	100009701							1.77125	1.78485	0.8221	1.2648	0.1726	3.516	0.0629	7.1649	3.9189	3.953	4.0796	1.0629	0.0709	6.5697	1.89876	2.92124	0.398645	8.12072	0.145277	16.5484	2.19565	2.21475	2.28568	0.595512	0.0397232	3.68081		2.72727	0.478791	0.394692
8445	TAG50:5-FA18:2		TAG Ester	53372	DMS-MS	100009520							1.98433	2.76272	0.6754	1.264	0.191	3.9303	0.0548	12.1462	4.0603	5.7201	4.6065	1.517	0.0844	10.7729	0.6754	1.264	0.191	3.9303	0.0548	12.1462	1.46968	2.07046	1.66738	0.549097	0.0305496	3.89939		1.88526	0.94386	0.580565
8446	TAG50:5-FA18:3		TAG Ester	54411	DMS-MS	100010559							1.32408	4.50133	0.7022	1.0897	0.2027	4.1411	0.0551	14.8751	6.3712	8.2088	8.2742	1.9505	0.1467	15.7541	1.04525	1.62206	0.301727	6.16419	0.0820185	22.1422	1.4154	1.82364	1.83817	0.433316	0.0325903	3.49987		3.46759	0.559009	0.437701
8449	TAG50:5-FA20:4		TAG Ester	54590	DMS-MS	100010738							0.85255	2.25512	0.0331	1.7648	0.0331	4.9291	0.1516	16.062	3.6002	2.9286	0.0331	0.961	0.1078	0.0331	0.0365181	1.94704	0.0365181	5.43811	0.167255	17.7207	1.59646	1.29865	0.0146777	0.426142	0.0478024	0.0146777		7.45823	0.249879	0.281282
8450	TAG50:5-FA20:5		TAG Ester	54241	DMS-MS	100010389							0.1423	0.0338667	0.0204	0.0204	0.0204	0.0204	0.0204	1.2482	0.0204	0.0204	0.0204	0.0204	0.0204	0.0204	0.0211115	0.0211115	0.0211115	0.0211115	0.0211115	1.29173	0.602362	0.602362	0.602362	0.602362	0.602362	0.602362		0.386614	0.526233	0.421741
8462	TAG50:6-FA20:4		TAG Ester	54055	DMS-MS	100010203							0.660517	0.452733	0.1791	0.1791	0.1791	0.1791	0.1791	20.03	0.1791	0.1791	0.1791	0.1791	0.1791	0.1791	0.219065	0.219065	0.219065	0.219065	0.219065	24.4995	0.395597	0.395597	0.395597	0.395597	0.395597	0.395597		10.7832	0.374269	0.34543
8486	TAG51:0-FA16:0		TAG Ester	54242	DMS-MS	100010390							1.96912	2.66788	0.8449	0.804	0.2956	2.2741	0.0764	2.4834	2.7779	5.4091	12.2564	1.29	0.1192	7.1843	0.752103	0.715695	0.263134	2.02433	0.0680088	2.21064	1.04124	2.02749	4.59405	0.483529	0.0446796	2.69288		0.554391	0.134379	0.214448
8487	TAG51:0-FA17:0		TAG Ester	53709	DMS-MS	100009857							1.72912	1.70758	0.7765	1.0156	0.362	2.1345	0.0895	1.7363	1.8906	3.2534	7.2607	0.9844	0.0704	4.5221	1.29525	1.69408	0.603837	3.56047	0.149291	2.89625	1.10718	1.90527	4.25203	0.576487	0.0412279	2.64825		0.968541	0.126132	0.208977
8488	TAG51:0-FA18:0		TAG Ester	53554	DMS-MS	100009702							1.7987	1.3964	0.756	1.1256	0.5023	2.54	0.1241	1.4175	1.704	2.8732	5.4946	1.0946	0.1267	3.3909	1.99253	2.96666	1.32387	6.69449	0.327081	3.736	1.22028	2.05758	3.93483	0.783873	0.0907333	2.42832		1.62051	0.0965119	0.18828
8497	TAG51:1-FA15:0		TAG Ester	53373	DMS-MS	100009521							1.70833	1.21887	0.7911	1.0075	0.318	2.7085	0.0676	1.2502	2.255	2.2964	3.197	0.9925	0.0646	4.0214	1.35281	1.72286	0.543791	4.63163	0.115598	2.13789	1.85008	1.88405	2.62293	0.814281	0.0530001	3.29929		0.998189	0.065628	0.175205
8498	TAG51:1-FA16:0		TAG Ester	53710	DMS-MS	100009858							1.83172	2.05422	0.8612	0.9093	0.3168	2.2773	0.0761	1.8255	2.5641	4.2046	8.199	1.1509	0.0733	5.7801	1.03064	1.0882	0.379129	2.72535	0.0910723	2.18466	1.24821	2.04681	3.9913	0.560262	0.0356827	2.81377		0.701104	0.102931	0.190742
8500	TAG51:1-FA17:0		TAG Ester	54412	DMS-MS	100010560							1.61638	1.72733	0.8638	0.9246	0.3055	2.1061	0.0687	1.6208	2.2215	3.3004	6.6243	1.0754	0.058	4.7818	0.85727	0.917611	0.303191	2.09018	0.0681807	1.60855	1.28609	1.91069	3.83499	0.622578	0.0335778	2.76831		0.558995	0.108532	0.195583
8501	TAG51:1-FA18:0		TAG Ester	54591	DMS-MS	100010739							1.61212	1.3291	0.7409	1.0573	0.3715	2.2317	0.0946	1.0095	1.9378	2.495	4.0622	0.9905	0.0963	3.7657	0.757954	1.08164	0.380051	2.28307	0.0967775	1.03274	1.45798	1.87721	3.05635	0.745241	0.072455	2.83327		0.560838	0.0702148	0.175205
8502	TAG51:1-FA18:1		TAG Ester	53891	DMS-MS	100010039							1.59315	1.59625	0.7963	0.9482	0.328	2.1925	0.0734	1.381	2.3882	3.1123	5.4985	1.0518	0.0713	4.1857	0.751865	0.895288	0.309697	2.07015	0.0693041	1.30394	1.49613	1.94976	3.44464	0.658919	0.0446672	2.62221		0.52859	0.0867119	0.181453
8511	TAG51:2-FA15:0		TAG Ester	54243	DMS-MS	100010391							1.84247	1.5375	0.9267	1.0286	0.2647	2.7205	0.0605	1.5242	3.3291	2.7486	3.9391	1.0704	0.0639	4.9076	1.49391	1.65819	0.426718	4.38566	0.0975308	2.45713	2.16527	1.78771	2.56202	0.696195	0.041561	3.19193		1.00713	0.0655795	0.175205
8512	TAG51:2-FA16:0		TAG Ester	53374	DMS-MS	100009522							1.77225	1.70728	1.0162	0.9838	0.3363	2.5374	0.0872	2.0414	2.4744	3.3447	5.0116	1.055	0.0831	4.9021	1.261	1.2208	0.417315	3.14866	0.108206	2.53317	1.44932	1.95908	2.93542	0.617941	0.0486738	2.87129		0.879316	0.103231	0.190742
8513	TAG51:2-FA16:1		TAG Ester	53375	DMS-MS	100009523							1.54033	2.83845	0.9599	0.9216	0.233	2.5889	0.064	2.3996	5.3705	4.4673	9.0491	1.2421	0.0798	8.1863	1.75517	1.68513	0.426038	4.73377	0.117023	4.38764	1.89205	1.57385	3.18804	0.437598	0.0281139	2.88407		1.30999	0.170711	0.23378
8514	TAG51:2-FA17:0		TAG Ester	54056	DMS-MS	100010204							1.64102	1.96095	0.8117	0.9964	0.3007	2.5862	0.0635	2.9629	2.748	3.857	6.2167	1.0036	0.067	5.3641	1.13625	1.3948	0.420932	3.62027	0.0888899	4.14759	1.40136	1.9669	3.17025	0.511793	0.0341671	2.73546		1.10069	0.182257	0.239537
8515	TAG51:2-FA18:0		TAG Ester	54592	DMS-MS	100010740							1.49938	1.40903	0.6661	1.1107	0.3711	2.5703	0.1032	1.6343	1.9305	2.6219	3.1264	0.8893	0.1032	4.0436	0.79241	1.32132	0.44147	3.0577	0.122769	1.94421	1.37009	1.86078	2.21883	0.631142	0.0732417	2.86977		0.851064	0.146169	0.22215
8516	TAG51:2-FA18:1		TAG Ester	53555	DMS-MS	100009703							1.64	1.6982	0.9522	1.0478	0.3269	2.5543	0.0802	1.3421	3.3729	2.8495	4.3616	1.143	0.0827	4.8866	1.2059	1.32697	0.413998	3.23486	0.101568	1.69969	1.98616	1.67795	2.56837	0.673066	0.0486986	2.87752		0.811959	0.0830756	0.18127
8517	TAG51:2-FA18:2		TAG Ester	54413	DMS-MS	100010561							1.72473	1.6406	0.7993	1.0415	0.3935	2.8721	0.073	3.0889	1.6525	3.2529	4.4336	0.9585	0.0784	4.216	0.893822	1.16466	0.440034	3.21174	0.0816327	3.45418	1.00725	1.98275	2.70243	0.584237	0.0477874	2.56979		1.03956	0.239284	0.275417
8525	TAG51:3-FA15:0		TAG Ester	54593	DMS-MS	100010741							1.95958	1.69055	0.8936	1.1162	0.2745	3.4053	0.0568	3.2771	2.6208	3.0861	3.1139	0.9046	0.064	5.2225	1.54763	1.93315	0.475407	5.89764	0.098372	5.67561	1.55026	1.8255	1.84194	0.535092	0.0378575	3.08923		1.75991	0.217503	0.262976
8526	TAG51:3-FA16:0		TAG Ester	53711	DMS-MS	100009859							1.74717	1.60033	0.9856	1.0979	0.5092	2.576	0.32	2.6872	1.8617	2.773	3.3589	0.9695	0.3093	4.3249	0.9856	1.0979	0.5092	2.576	0.32	2.6872	1.16332	1.73276	2.09888	0.605811	0.193272	2.7025		0.962262	0.196278	0.250323
8527	TAG51:3-FA16:1		TAG Ester	53376	DMS-MS	100009524							1.56927	2.35088	0.9831	1.0169	0.2262	2.8082	0.0626	2.6282	5.0793	3.3643	5.2663	1.1414	0.0808	6.9211	4.37711	4.5276	1.00712	12.5031	0.278718	11.7017	2.16059	1.43108	2.24014	0.48552	0.0343701	2.94404		3.70012	0.217909	0.262976
8528	TAG51:3-FA17:0		TAG Ester	53377	DMS-MS	100009525							1.71468	2.6004	0.8852	1.0107	0.2684	3.0077	0.0665	5.0408	3.2944	4.4368	6.2274	0.9893	0.0717	6.7273	1.25243	1.43	0.379749	4.25548	0.0940882	7.13203	1.26688	1.7062	2.39479	0.380441	0.0275727	2.58703		1.73908	0.543387	0.429486
8530	TAG51:3-FA18:1		TAG Ester	53378	DMS-MS	100009526							1.69003	1.83903	0.9525	1.0899	0.3617	2.8	0.1773	2.3339	3.7812	2.7998	3.7454	1.0475	0.1846	5.4949	0.929374	1.06344	0.352918	2.73202	0.172995	2.27723	2.05608	1.52243	2.03661	0.569593	0.100379	2.98793		0.811815	0.156906	0.225749
8531	TAG51:3-FA18:2		TAG Ester	54244	DMS-MS	100010392							1.82275	1.76837	0.8513	1.138	0.3231	2.9926	0.0718	3.2813	2.4951	3.1439	3.4545	1.017	0.0828	5.1797	1.38333	1.8492	0.525024	4.86285	0.116672	5.33198	1.41096	1.77786	1.9535	0.575107	0.0468229	2.92909		1.61837	0.23723	0.274023
8532	TAG51:3-FA18:3		TAG Ester	53712	DMS-MS	100009860							1.42283	2.66388	0.6544	0.9579	0.3008	2.4036	0.0772	7.3526	1.9532	4.6766	6.7887	1.3442	0.0899	6.5498	0.714501	1.04588	0.328426	2.62435	0.0842902	8.02788	0.733215	1.75556	2.54842	0.504602	0.0337477	2.45874		1.59632	0.968502	0.584729
8538	TAG51:4-FA15:0		TAG Ester	53556	DMS-MS	100009704							2.10165	1.95032	0.926	1.2074	0.298	4.1004	0.061	8.2265	2.0447	3.8123	2.7109	0.8919	0.0774	5.7529	1.09672	1.43	0.352941	4.85638	0.0722463	9.74319	1.04839	1.95471	1.38998	0.45731	0.0396859	2.94973		2.23877	0.864935	0.553462
8539	TAG51:4-FA16:0		TAG Ester	54414	DMS-MS	100010562							1.30053	1.72753	1.0416	0.9067	0.5141	2.172	0.3905	4.6106	1.6333	3.2129	3.6308	1.0423	0.3766	4.3089	1.05701	0.920118	0.521708	2.20414	0.396279	4.67883	0.945452	1.85982	2.10173	0.603346	0.217999	2.49425		1.18917	0.83294	0.540882
8540	TAG51:4-FA16:1		TAG Ester	54245	DMS-MS	100010393							1.71277	2.28408	0.9074	1.0439	0.2252	3.1981	0.06	4.1573	4.1136	3.2668	4.125	1.0763	0.0801	7.481	1.12613	1.29554	0.279485	3.96902	0.0744632	5.15943	1.80099	1.43025	1.80598	0.471217	0.0350688	3.27527		1.34986	0.404283	0.36037
8542	TAG51:4-FA18:1		TAG Ester	54415	DMS-MS	100010563							1.69302	1.71058	1.0164	1.2052	0.3393	2.9627	0.1915	3.9862	3.0371	3.0455	3.1708	0.9836	0.2044	5.5078	1.06024	1.25718	0.353935	3.09049	0.19976	4.15814	1.77548	1.78039	1.85364	0.575009	0.119491	3.21984		1.08536	0.325662	0.323834
8543	TAG51:4-FA18:2		TAG Ester	53557	DMS-MS	100009705							1.94942	2.11918	0.8317	1.2522	0.2775	3.5474	0.0666	6.0417	2.8325	3.6853	3.4267	0.9943	0.0853	6.7724	0.932068	1.40331	0.310988	3.97549	0.0746372	6.7708	1.3366	1.73902	1.61699	0.46919	0.0402514	3.19576		1.60367	0.588592	0.450146
8544	TAG51:4-FA18:3		TAG Ester	54057	DMS-MS	100010205							1.44938	2.83725	0.9672	0.9621	0.3312	3.5687	0.0542	7.2025	2.8824	5.038	5.1897	1.2481	0.113	7.8241	1.09331	1.08755	0.374385	4.03402	0.0612672	8.14164	1.01591	1.77566	1.82913	0.439898	0.0398273	2.75764		1.88242	0.830111	0.540103
8546	TAG51:4-FA20:4		TAG Ester	53713	DMS-MS	100009861							4.09693	4.57798	3.5171	0.3742	2.4774	0.3742	2.0394	21.8792	0.3742	0.3742	0.3742	0.3742	0.8484	0.3742	3.78393	0.402589	2.66535	0.402589	2.19412	23.5391	0.081739	0.081739	0.081739	0.081739	0.185322	0.081739		55.5332	0.224014	0.267538
8555	TAG51:5-FA18:2		TAG Ester	54058	DMS-MS	100010206							1.85732	1.90963	0.7034	1.1823	0.2539	2.5209	0.053	8.3568	2.4607	3.8703	2.7122	0.907	0.0721	6.3507	0.856447	1.43955	0.309144	3.0694	0.0645318	10.1751	1.28857	2.02672	1.42027	0.47496	0.0377559	3.32561		1.85612	0.767757	0.518293
8556	TAG51:5-FA18:3		TAG Ester	54416	DMS-MS	100010564							1.79725	3.33922	0.9793	0.0302	0.3166	4.3886	0.0795	10.7687	3.6035	5.7179	6.204	1.5596	0.1233	10.5213	1.09621	0.0338053	0.354396	4.91252	0.0889909	12.0543	1.07915	1.71235	1.85792	0.467056	0.0369248	3.15083		2.23262	0.890875	0.56418
8579	TAG52:0-FA16:0		TAG Ester	53714	DMS-MS	100009862							1.88902	1.24315	0.93	1.3141	0.5182	2.4554	0.113	0.9645	1.818	2.7308	5.2922	1.5329	0.1116	3.218	1.31557	1.85892	0.733043	3.47339	0.159849	1.36438	1.46241	2.19668	4.25709	1.23308	0.089772	2.58859		0.752912	0.057925	0.17396
8581	TAG52:0-FA18:0		TAG Ester	53892	DMS-MS	100010040							1.94025	1.19498	0.9498	1.4355	0.5722	2.6411	0.1353	0.868	1.7984	2.6915	5.1906	1.5127	0.122	3.2785	1.25785	1.90107	0.75778	3.49768	0.179182	1.14952	1.50496	2.25233	4.34366	1.26588	0.102093	2.74355		0.715914	0.0556988	0.17396
8583	TAG52:0-FA20:0		TAG Ester	54059	DMS-MS	100010207							2.93613	1.6531	1.0918	0.8423	0.2145	2.0681	0.0722	2.9239	2.3483	2.9112	6.8852	1.3539	0.0748	6.9338	1.50196	1.15873	0.295082	2.84503	0.0993236	4.02233	1.42054	1.76105	4.16502	0.819007	0.0452483	4.19442		0.799856	0.0665644	0.175205
8590	TAG52:1-FA16:0		TAG Ester	54417	DMS-MS	100010565							1.66803	1.15758	0.9161	1.1419	0.4208	2.2577	0.086	0.8141	2.1659	2.5683	4.7921	1.3991	0.0854	3.4335	0.842946	1.05072	0.387198	2.07742	0.0791326	0.749091	1.87105	2.21867	4.13975	1.20864	0.0737744	2.96609		0.415652	0.0453518	0.17396
8591	TAG52:1-FA16:1		TAG Ester	53379	DMS-MS	100009527							1.43648	1.56737	0.8159	1.0408	0.3175	2.164	0.0759	1.071	3.3992	3.0792	6.291	1.4602	0.0898	4.7591	0.830729	1.05972	0.32327	2.20333	0.0772794	1.09046	2.16873	1.96457	4.01374	0.931626	0.0572935	3.03637		0.45881	0.0625081	0.175205
8593	TAG52:1-FA18:0		TAG Ester	53715	DMS-MS	100009863							1.78568	1.06477	0.9468	1.2795	0.4872	2.4225	0.0962	0.8641	2.0722	2.617	4.9533	1.4593	0.0893	3.4056	0.779163	1.05296	0.400938	1.99358	0.0791672	0.711106	1.94615	2.45782	4.65201	1.37054	0.0838681	3.19845		0.365962	0.0429746	0.17396
8594	TAG52:1-FA18:1		TAG Ester	53558	DMS-MS	100009706							1.61448	1.20805	0.9218	1.1067	0.3884	2.2665	0.0825	0.8121	2.4336	2.5354	4.7824	1.3817	0.0841	3.6729	1.39024	1.6691	0.585778	3.41829	0.124425	1.22479	2.01449	2.09875	3.95878	1.14374	0.0696163	3.04035		0.682527	0.0453575	0.17396
8596	TAG52:1-FA20:0		TAG Ester	53893	DMS-MS	100010041							2.32783	2.28518	0.9786	0.8573	0.1956	2.4122	0.0495	3.4368	5.3969	3.723	9.7756	1.9241	0.1086	10.3248	1.95707	1.71449	0.391174	4.82408	0.0989934	6.87314	2.36169	1.62919	4.27782	0.841989	0.0475235	4.51815		1.15959	0.0699983	0.175205
8597	TAG52:1-FA20:1		TAG Ester	53559	DMS-MS	100009707							1.45855	1.66957	0.8447	0.9724	0.3511	2.0259	0.0842	1.739	2.4702	3.1475	4.5415	1.5318	0.1296	5.2227	1.06778	1.2292	0.443822	2.56092	0.106436	2.19825	1.47955	1.88522	2.72017	0.917484	0.0776249	3.12818		0.745126	0.086376	0.181453
8604	TAG52:2-FA14:0		TAG Ester	53716	DMS-MS	100009864							1.1722	1.64478	0.5297	0.9225	0.2797	2.5291	0.0512	0.9976	3.6349	3.2053	5.3212	1.7862	0.1124	6.9653	0.494762	0.861653	0.261251	2.36228	0.0478229	0.931799	2.20996	1.94877	3.2352	1.08598	0.0683373	4.23478		0.387981	0.0805168	0.180389
8607	TAG52:2-FA16:0		TAG Ester	53717	DMS-MS	100009865							1.71625	1.34625	0.9943	1.0736	0.3635	2.3969	0.0765	1.0057	2.8252	2.7581	4.9369	1.4213	0.0875	4.196	1.9037	2.05552	0.69596	4.58913	0.146468	1.92552	2.09857	2.04873	3.66715	1.05575	0.0649954	3.11681		0.938956	0.0441326	0.17396
8608	TAG52:2-FA16:1		TAG Ester	53560	DMS-MS	100009708							1.55597	1.71802	0.9339	1.0661	0.2964	2.4833	0.0728	1.0961	4.5922	3.1011	5.9753	1.5818	0.0936	5.6887	1.16205	1.32655	0.36881	3.08996	0.0905848	1.36387	2.67297	1.80505	3.47802	0.920713	0.0544814	3.3112		0.604604	0.0545397	0.17396
8610	TAG52:2-FA18:0		TAG Ester	53380	DMS-MS	100009528							1.45547	1.05997	0.7239	1.0121	0.3545	2.1811	0.0706	1.2931	1.955	2.4751	3.8976	1.1026	0.0725	3.4059	0.759588	1.062	0.371977	2.28863	0.0740806	1.35685	1.8444	2.33507	3.6771	1.04022	0.0683984	3.21321		0.485541	0.0540936	0.17396
8611	TAG52:2-FA18:1		TAG Ester	53894	DMS-MS	100010042							1.72218	1.39587	1.0149	1.0916	0.3504	2.4143	0.0832	0.9851	3.091	2.8014	5.1039	1.4987	0.0884	4.3812	1.0149	1.0916	0.3504	2.4143	0.0832	0.9851	2.21439	2.00693	3.65644	1.07367	0.0633298	3.1387		0.488709	0.0426097	0.17396
8612	TAG52:2-FA18:2		TAG Ester	53895	DMS-MS	100010043							1.61232	1.10892	0.7431	1.0419	0.3475	2.3619	0.0698	1.7667	1.4636	2.5702	3.355	1.0123	0.0715	3.4396	1.09747	1.53877	0.513218	3.48826	0.103087	2.60922	1.31985	2.31776	3.02548	0.912873	0.0644773	3.10177		0.870401	0.0768469	0.17792
8614	TAG52:2-FA20:0		TAG Ester	54060	DMS-MS	100010208							1.61198	1.78493	0.7305	0.9011	0.2306	2.3678	0.0534	2.489	4.0784	2.9819	5.0626	1.321	0.0827	7.1239	0.7305	0.9011	0.2306	2.3678	0.0534	2.489	2.2849	1.67059	2.8363	0.740084	0.0463323	3.99113		0.585375	0.097348	0.188712
8615	TAG52:2-FA20:1		TAG Ester	53718	DMS-MS	100009866							1.08923	2.13412	0.6291	0.896	0.2284	2.1909	0.055	1.4656	4.4803	3.6229	5.8882	1.7292	0.12	7.3231	1.01304	1.44283	0.367794	3.52802	0.0885668	2.36006	2.09937	1.69761	2.75908	0.810265	0.0562294	3.43144		0.810791	0.136766	0.215641
8616	TAG52:2-FA20:2		TAG Ester	54418	DMS-MS	100010566							1.27387	1.28333	0.7678	1.2101	0.5038	2.2273	0.1474	1.4862	1.417	2.414	2.9246	0.8978	0.1352	3.3123	1.10197	1.73678	0.723071	3.1967	0.211554	2.13305	1.10416	1.88104	2.27891	0.699584	0.105351	2.58101		1.05238	0.219583	0.263958
8619	TAG52:3-FA14:0		TAG Ester	54061	DMS-MS	100010209							1.21762	1.60833	0.5477	1.1962	0.3411	3.1005	0.0625	1.0913	2.5369	3.512	3.7457	1.3742	0.0967	6.2617	0.580334	1.26747	0.361424	3.28524	0.066224	1.15632	1.57735	2.18363	2.32893	0.854425	0.0601244	3.89328		0.616368	0.181152	0.239318
8622	TAG52:3-FA16:0		TAG Ester	53381	DMS-MS	100009529							1.75742	1.39683	0.8844	1.0522	0.3395	2.5901	0.0702	2.133	2.0045	2.9934	3.8349	1.1512	0.0782	4.3497	1.11617	1.32795	0.428472	3.26888	0.0885972	2.69199	1.43503	2.14299	2.74542	0.82415	0.0559838	3.11397		0.864747	0.08696	0.181453
8623	TAG52:3-FA16:1		TAG Ester	53896	DMS-MS	100010044							1.64463	2.02667	0.9428	1.0529	0.2472	2.5823	0.0677	1.3877	5.9959	3.2903	5.9517	1.5807	0.0967	6.5623	1.17349	1.31053	0.307686	3.21415	0.0842651	1.72725	2.9585	1.6235	2.93669	0.779951	0.0477138	3.23798		0.674822	0.0642541	0.175205
8625	TAG52:3-FA18:0		TAG Ester	54246	DMS-MS	100010394							1.51048	1.4706	0.7628	1.0431	0.2809	2.5434	0.0635	2.305	2.4107	3.1039	4.2215	1.1462	0.0803	4.6516	0.770298	1.05335	0.283661	2.5684	0.0641241	2.32766	1.63926	2.11064	2.8706	0.77941	0.0546036	3.16306		0.665641	0.115531	0.201221
8626	TAG52:3-FA18:1		TAG Ester	54594	DMS-MS	100010742							1.71037	1.71153	0.9175	1.0825	0.3114	2.6608	0.0679	1.8374	3.7432	3.1437	4.9724	1.3471	0.0894	5.3871	0.845544	0.997604	0.286978	2.45212	0.0625749	1.6933	2.18704	1.83677	2.90523	0.787072	0.0522339	3.14753		0.580633	0.0718529	0.175318
8627	TAG52:3-FA18:2		TAG Ester	54247	DMS-MS	100010395							1.76267	1.38432	0.8531	1.0695	0.3347	2.5983	0.0699	2.2203	2.0146	2.9637	3.9604	1.143	0.0788	4.4521	1.09705	1.37533	0.430409	3.34129	0.0898881	2.8552	1.4553	2.14091	2.86091	0.825678	0.0569234	3.2161		0.87053	0.0875728	0.181453
8628	TAG52:3-FA18:3		TAG Ester	53897	DMS-MS	100010045							1.50565	1.73838	0.8426	1.0159	0.3005	2.7048	0.0767	3.5882	1.7334	4.2888	5.1645	1.3656	0.0952	5.4653	0.960684	1.15827	0.342613	3.08386	0.0874489	4.09106	0.997133	2.46712	2.97086	0.785557	0.0547635	3.1439		0.933258	0.253583	0.283373
8629	TAG52:3-FA20:0		TAG Ester	53561	DMS-MS	100009709							1.78375	1.43078	0.9115	1.0535	0.3474	2.5842	0.0709	2.545	2.1083	3.2404	3.8521	1.1387	0.0892	4.7182	1.17532	1.35842	0.44795	3.33216	0.091421	3.28161	1.47353	2.26477	2.6923	0.795858	0.0623435	3.29763		0.915027	0.0947771	0.185761
8630	TAG52:3-FA20:1		TAG Ester	53562	DMS-MS	100009710							1.12087	1.95827	0.5267	0.9868	0.2462	2.2762	0.0453	1.565	3.9031	3.5326	4.8409	1.4747	0.1059	7.1796	0.506004	0.948026	0.236526	2.18676	0.04352	1.50351	1.99314	1.80394	2.47203	0.753064	0.0540784	3.6663		0.50494	0.154342	0.22428
8631	TAG52:3-FA20:2		TAG Ester	54248	DMS-MS	100010396							1.29252	1.54892	0.8012	1.2015	0.3661	2.8352	0.0778	1.8079	2.1553	2.8903	3.8712	1.0689	0.0947	4.8981	0.864511	1.29644	0.395029	3.05924	0.0839478	1.95076	1.39149	1.86601	2.4993	0.690095	0.0611395	3.16227		0.791074	0.250314	0.281428
8632	TAG52:3-FA20:3		TAG Ester	54595	DMS-MS	100010743							1.22702	1.78512	0.9837	1.0433	0.3903	2.207	0.2757	4.5256	1.7166	3.1561	3.8275	0.9977	0.1795	3.0399	1.03899	1.10194	0.412238	2.33105	0.291197	4.77997	0.961618	1.76801	2.14412	0.558899	0.100554	1.70291		1.37579	0.908042	0.570522
8633	TAG52:3-FA22:1		TAG Ester	53719	DMS-MS	100009867							1.9419	1.7559	0.8833	1.031	0.3619	2.3647	0.07	2.1044	3.6146	3.5279	4.3298	1.2583	0.0844	5.8496	1.18787	1.3865	0.486686	3.18007	0.0941366	2.83002	2.05855	2.00917	2.46586	0.716613	0.0480665	3.3314		0.862237	0.060869	0.174063
8635	TAG52:4-FA14:0		TAG Ester	54596	DMS-MS	100010744							1.31017	1.57618	0.8338	1.5922	0.384	3.9447	0.1422	2.5322	1.8558	2.7336	3.8511	0.9935	0.1409	4.4023	0.971795	1.85571	0.447552	4.59755	0.165734	2.95128	1.1774	1.73432	2.44331	0.63032	0.0893932	2.79301		1.23928	0.664001	0.483104
8638	TAG52:4-FA16:0		TAG Ester	54249	DMS-MS	100010397							1.78655	1.4589	0.781	1.0396	0.3211	2.8156	0.0634	5.1364	1.4796	3.6406	3.5098	1.017	0.0831	4.8031	0.91452	1.21733	0.375995	3.29696	0.0742389	6.01452	1.01419	2.49544	2.40579	0.697101	0.0569607	3.29228		1.19392	0.317813	0.31913
8639	TAG52:4-FA16:1		TAG Ester	54062	DMS-MS	100010210							1.76513	1.98112	0.8707	1.0474	0.2398	2.7821	0.0547	3.0053	4.1887	3.3436	4.6118	1.2504	0.0868	6.8352	0.768332	0.924258	0.211607	2.45501	0.048269	2.65197	2.11431	1.68774	2.32788	0.631159	0.0438137	3.45018		0.688386	0.138324	0.216613
8641	TAG52:4-FA18:0		TAG Ester	53382	DMS-MS	100009530							1.54617	1.58805	0.7027	1.1061	0.283	2.8265	0.0826	4.004	2.301	3.4962	4.6818	1.0599	0.0792	4.8098	0.721643	1.13592	0.290629	2.9027	0.0848267	4.11194	1.44895	2.20157	2.94814	0.667422	0.0498725	3.02875		0.893951	0.272366	0.292985
8642	TAG52:4-FA18:1		TAG Ester	53898	DMS-MS	100010046							1.71225	1.93585	0.8666	1.0338	0.2368	2.8259	0.0598	3.1865	4.0452	3.451	4.7013	1.2784	0.0865	5.6829	0.819687	0.977835	0.223981	2.67292	0.0565627	3.014	2.08962	1.78268	2.42855	0.660382	0.0446832	2.93561		0.781066	0.152257	0.224172
8643	TAG52:4-FA18:2		TAG Ester	54597	DMS-MS	100010745							1.88157	1.80202	0.8464	1.0925	0.289	3.0305	0.0621	4.5955	2.7547	3.6262	4.0128	1.1214	0.0858	5.8069	0.95761	1.23605	0.326972	3.42868	0.0702595	5.19931	1.52868	2.0123	2.22684	0.622303	0.0476133	3.22245		1.16135	0.256871	0.284629
8644	TAG52:4-FA18:3		TAG Ester	54419	DMS-MS	100010567							1.61308	2.19017	0.9374	1.0311	0.3126	2.9554	0.0743	4.9447	2.231	4.8273	5.5614	1.4872	0.1122	6.8799	1.08031	1.18829	0.360256	3.40595	0.085627	5.69852	1.01864	2.20408	2.53926	0.679035	0.051229	3.14127		1.22686	0.442904	0.376223
8645	TAG52:4-FA20:0		TAG Ester	53383	DMS-MS	100009531							1.77728	1.60982	0.853	1.043	0.3249	2.8441	0.0619	5.4174	1.621	3.8109	3.3506	1.1401	0.0854	4.8727	0.897721	1.09768	0.341934	2.99321	0.0651453	5.70143	1.00695	2.36729	2.08136	0.708217	0.0530495	3.02687		1.2005	0.420953	0.366452
8647	TAG52:4-FA20:2		TAG Ester	53899	DMS-MS	100010047							1.43073	1.83652	0.7136	1.3829	0.2831	3.5628	0.0675	2.9336	3.2889	3.3273	3.5689	1.0995	0.0936	5.7908	0.869643	1.6853	0.345005	4.34188	0.0822602	3.57509	1.79084	1.81175	1.9433	0.598688	0.050966	3.15314		1.16585	0.416401	0.365212
8648	TAG52:4-FA20:3		TAG Ester	53900	DMS-MS	100010048							1.38028	2.52627	0.9976	1.2466	0.317	3.6969	0.1317	5.5414	3.2505	4.568	5.6776	1.3067	0.1475	6.5412	1.05427	1.31741	0.335007	3.9069	0.139181	5.85617	1.28668	1.8082	2.24743	0.517245	0.0583866	2.58928		1.48215	0.976627	0.586614
8649	TAG52:4-FA20:4		TAG Ester	53563	DMS-MS	100009711							1.29807	1.8935	1.526	1.3058	0.5316	3.4171	0.657	14.9529	1.2147	1.6147	2.143	0.5335	0.1772	1.4049	1.75537	1.50207	0.611503	3.93071	0.755752	17.2004	0.64151	0.852759	1.13177	0.281753	0.0935833	0.741959		6.88045	0.257694	0.284856
8650	TAG52:4-FA22:1		TAG Ester	54598	DMS-MS	100010746							1.68093	1.95287	0.7895	1.0743	0.2642	2.727	0.0541	3.3493	3.2201	3.3696	4.1146	1.1593	0.0878	6.0785	0.932095	1.26833	0.311918	3.21954	0.0638712	3.95423	1.64891	1.72546	2.10695	0.59364	0.0449595	3.1126		1.05605	0.225384	0.268131
8651	TAG52:4-FA22:4		TAG Ester	53384	DMS-MS	100009532							1.54945	1.33742	0.8014	0.9576	0.3757	2.5373	0.262	4.3993	1.6061	2.5557	3.7563	0.9279	0.2656	2.9798	0.872731	1.04283	0.40914	2.76314	0.28532	4.79087	1.2009	1.91092	2.80862	0.6938	0.198592	2.22803		1.12423	0.41042	0.36303
8653	TAG52:5-FA14:0		TAG Ester	53901	DMS-MS	100010049							1.42252	1.77635	1.1504	1.3535	0.38	4.7398	0.2202	8.649	1.4594	3.9423	3.3455	1.0114	0.1305	4.7765	1.72633	2.03111	0.570242	7.11272	0.33044	12.979	0.821572	2.21933	1.88336	0.56937	0.0734653	2.68894		2.99779	0.61069	0.459603
8656	TAG52:5-FA16:0		TAG Ester	54250	DMS-MS	100010398							1.6768	2.47417	0.8683	1.0554	0.2891	3.2912	0.0673	11.0585	1.71	6.5002	5.3552	1.4217	0.1201	8.0746	1.40135	1.70331	0.466579	5.31167	0.108616	17.8473	0.691142	2.62723	2.16445	0.574618	0.0485416	3.26356		2.86448	0.939075	0.579946
8657	TAG52:5-FA16:1		TAG Ester	54063	DMS-MS	100010211							1.75897	2.04382	0.7945	1.0555	0.2147	3.119	0.051	7.069	3.0071	3.742	3.9282	1.0857	0.0821	7.6606	1.02609	1.36317	0.277283	4.02815	0.0658659	9.12954	1.47132	1.83089	1.92199	0.531212	0.0401699	3.74818		1.66497	0.615219	0.46169
8660	TAG52:5-FA18:1		TAG Ester	54420	DMS-MS	100010568							1.69752	2.12378	0.7946	1.0411	0.2122	3.1332	0.0595	5.6854	3.5222	4.0212	4.8202	1.2068	0.0904	7.4717	0.733669	0.961267	0.195928	2.89294	0.0549374	5.24943	1.65846	1.89341	2.26963	0.568231	0.0425655	3.51811		1.01385	0.44151	0.375386
8661	TAG52:5-FA18:2		TAG Ester	54251	DMS-MS	100010399							1.80998	2.03812	0.7266	1.064	0.235	3.2305	0.0515	7.5777	2.6787	3.8666	3.6876	1.0478	0.0835	6.6551	0.817032	1.19642	0.264248	3.63256	0.0579096	8.52081	1.3143	1.89714	1.80932	0.514102	0.0409692	3.26532		1.63881	0.728616	0.502178
8662	TAG52:5-FA18:3		TAG Ester	53720	DMS-MS	100009868							1.6371	2.91768	0.9216	1.106	0.2729	3.4332	0.0682	9.8338	3.178	6.2485	6.1088	1.5905	0.1281	8.816	0.939434	1.1274	0.278181	3.49963	0.0695197	10.0241	1.08922	2.1416	2.09372	0.545124	0.0439047	3.02158		1.78377	0.923958	0.573829
8666	TAG52:5-FA20:3		TAG Ester	53902	DMS-MS	100010050							1.30388	2.68153	0.9856	1.1805	0.2257	3.194	0.0954	6.6059	4.1961	3.6034	4.37	1.0144	0.1253	7.4912	1.00402	1.20257	0.229919	3.25371	0.0971833	6.72938	1.56481	1.34378	1.62966	0.378291	0.046727	2.79363		1.61363	0.760389	0.514838
8667	TAG52:5-FA20:4		TAG Ester	53721	DMS-MS	100009869							0.991917	2.11105	1.2861	1.4179	0.2916	3.925	0.2925	18.0257	3.2458	2.6707	3.1255	0.6419	0.139	2.3215	1.23044	1.35654	0.278981	3.75514	0.279842	17.2456	1.53753	1.26511	1.48054	0.304067	0.065844	1.09969		4.19738	0.300943	0.308241
8668	TAG52:5-FA20:5		TAG Ester	53722	DMS-MS	100009870							0.770667	2.72772	0.0759	2.6792	0.0759	4.5288	0.4491	13.7577	0.0759	4.3967	8.7884	0.0759	0.1422	6.1375	0.0720011	2.54157	0.0720011	4.29616	0.42603	13.051	0.0278255	1.61186	3.22189	0.0278255	0.0521315	2.25005		2.84482	0.275248	0.294662
8670	TAG52:5-FA22:5		TAG Ester	53385	DMS-MS	100009533							1.47732	1.98298	0.7134	1.1682	0.2141	3.4121	0.1139	8.2522	1.4241	4.7474	4.1575	1.1197	0.1518	6.8905	0.969052	1.58683	0.290824	4.63485	0.154717	11.2094	0.71816	2.39407	2.09659	0.564654	0.0765513	3.47481		2.02102	0.991602	0.589191
8672	TAG52:6-FA14:0		TAG Ester	54421	DMS-MS	100010569							1.51522	0.88925	1.8847	2.5993	0.5968	6.2721	0.4564	25.6059	3.1692	5.0206	0.056	0.056	0.3763	0.056	2.66094	3.66986	0.842601	8.85535	0.644375	36.1521	3.5639	5.64588	0.0629744	0.0629744	0.423166	0.0629744		5.37832	0.407597	0.361227
8675	TAG52:6-FA16:0		TAG Ester	54599	DMS-MS	100010747							1.539	3.09143	0.8001	0.8368	0.2672	2.8793	0.1065	12.4149	2.2286	7.9098	9.5617	1.5828	0.1845	8.5298	0.856134	0.895404	0.285913	3.08095	0.113959	13.2844	0.720895	2.55862	3.09297	0.511996	0.0596811	2.75917		1.90828	0.857563	0.550249
8676	TAG52:6-FA16:1		TAG Ester	53386	DMS-MS	100009534							1.66233	3.80285	0.9206	1.2759	0.2356	4.0176	0.0612	17.2601	3.7724	6.905	6.5458	1.6044	0.1481	13.2839	1.00641	1.39483	0.257561	4.3921	0.0669047	18.869	0.991993	1.81574	1.72129	0.421894	0.0389445	3.49314		3.0634	0.59233	0.451886
8678	TAG52:6-FA18:1		TAG Ester	54422	DMS-MS	100010570							2.07782	1.75072	1.0575	1.8437	0.307	4.7217	0.082	13.6257	2.8163	3.4935	3.8608	0.6898	0.0713	5.6421	1.12245	1.95694	0.325856	5.01171	0.0870365	14.4626	1.60866	1.99547	2.20527	0.39401	0.0407262	3.22274		2.426	0.892651	0.564597
8679	TAG52:6-FA18:2		TAG Ester	53387	DMS-MS	100009535							2.01382	2.63125	0.807	1.2371	0.2458	4.0038	0.0608	15.2997	2.9267	5.2206	4.3118	1.1594	0.1023	8.7786	1.14177	1.75028	0.347765	5.66469	0.0860215	21.6464	1.11229	1.98408	1.63869	0.440627	0.0388789	3.33629		3.58292	0.784834	0.524438
8680	TAG52:6-FA18:3		TAG Ester	54064	DMS-MS	100010212							1.67743	3.7387	0.9964	1.1926	0.2448	4.2675	0.0619	18.3182	3.7448	7.4459	6.7439	1.643	0.1413	12.6407	1.48406	1.77629	0.364611	6.35612	0.0921954	27.2836	1.00163	1.99157	1.80381	0.439458	0.0377939	3.38104		4.31606	0.580805	0.447218
8684	TAG52:6-FA20:4		TAG Ester	54065	DMS-MS	100010213							1.04805	1.83288	1.1655	1.4383	0.2622	4.857	0.1961	24.7058	3.6749	2.8462	3.2407	0.52	0.1178	3.3412	1.21683	1.50164	0.273748	5.07091	0.204736	25.7939	2.00498	1.55285	1.76809	0.283706	0.0642703	1.82292		4.54349	0.341207	0.331779
8685	TAG52:6-FA20:5		TAG Ester	53723	DMS-MS	100009871							1.9278	4.03267	0.8318	0.794	0.0213	3.2684	0.1012	9.7987	2.6836	7.0945	19.2114	1.2925	0.0795	11.9107	0.847219	0.808719	0.0216948	3.32899	0.103076	9.98034	0.665465	1.75926	4.76394	0.320508	0.019714	2.95355		1.43955	0.679336	0.487177
8688	TAG52:6-FA22:6		TAG Ester	54252	DMS-MS	100010400							1.47132	1.56862	1.1491	1.2159	0.3627	3.9862	0.4155	10.8016	1.7878	2.9151	2.5175	0.8673	0.3059	5.0171	1.13366	1.19957	0.357828	3.93265	0.409918	10.6565	1.13973	1.85839	1.60492	0.552908	0.195013	3.19842		2.06917	0.631817	0.471456
8692	TAG52:7-FA16:0		TAG Ester	53564	DMS-MS	100009712							1.96902	2.6514	0.7718	0.7979	0.291	2.4751	0.0727	2.7092	2.8012	5.2709	11.8929	1.3802	0.0997	6.8306	1.93296	1.99833	0.728806	6.19886	0.182076	6.78516	1.0565	1.98797	4.48552	0.520555	0.0376028	2.57622		1.67157	0.143361	0.220012
8694	TAG52:7-FA18:1		TAG Ester	54423	DMS-MS	100010571							1.58205	1.72188	0.7845	1.013	0.2987	2.2556	0.0775	2.4074	2.2427	3.6463	6.6732	0.987	0.0782	4.9347	0.952333	1.22972	0.362603	2.73815	0.09408	2.92243	1.30247	2.11762	3.87552	0.57321	0.0454154	2.86587		0.769873	0.137974	0.216433
8700	TAG52:7-FA20:5		TAG Ester	54066	DMS-MS	100010214							0.736183	1.15127	0.02	0.02	0.02	1.0475	0.02	2.6865	1.3459	2.2508	6.161	0.4702	0.02	3.8237	0.02303	0.02303	0.02303	1.2062	0.02303	3.0935	1.16906	1.95506	5.3515	0.40842	0.0173722	3.3213		0.359316	0.277413	0.29525
8703	TAG52:7-FA22:6		TAG Ester	54600	DMS-MS	100010748							2.29467	2.40582	1.3682	1.7617	0.3665	4.0538	0.183	10.2684	4.7995	3.4368	0.0393	0.0393	0.1602	7.4845	1.44566	1.86144	0.38725	4.28331	0.193361	10.8498	1.99496	1.42854	0.0163354	0.0163354	0.0665886	3.111		2.86727	0.819623	0.537925
8707	TAG52:8-FA16:1		TAG Ester	53388	DMS-MS	100009536							1.59167	4.01577	0.9551	0.9342	0.2198	2.635	0.0559	3.8423	5.8579	6.372	16.6961	1.6433	0.0911	10.8994	0.987081	0.965482	0.22716	2.72323	0.0577718	3.97096	1.45873	1.58675	4.15764	0.409212	0.0226856	2.71415		0.863035	0.292909	0.304071
8708	TAG52:8-FA18:2		TAG Ester	53724	DMS-MS	100009872							1.47673	1.54882	0.7858	1.0288	0.3109	2.2994	0.059	3.9891	1.486	3.0806	4.5604	0.9712	0.0613	4.1423	0.791977	1.03689	0.313344	2.31748	0.0594638	4.02046	0.959442	1.989	2.94444	0.627059	0.0395786	2.67449		0.924799	0.37775	0.34543
8723	TAG53:0-FA16:0		TAG Ester	54601	DMS-MS	100010749							1.85822	2.1494	0.8798	0.9196	0.2668	3.2495	0.1026	5.7502	3.0931	5.1549	12.4103	1.3571	0.146	7.2778	1.35663	1.41801	0.4114	5.01067	0.158207	8.8667	1.43905	2.3983	5.77384	0.631386	0.0679259	3.38597		1.25738	0.228104	0.270234
8733	TAG53:1-FA16:0		TAG Ester	54602	DMS-MS	100010750							2.41843	2.75192	0.8618	0.9196	0.2219	2.9319	0.0416	1.9467	4.2589	6.2887	15.8065	1.6368	0.0784	10.3946	1.56199	1.66675	0.402187	5.31398	0.0753987	3.52833	1.54761	2.28521	5.74381	0.594785	0.0284892	3.77722		0.897798	0.0869403	0.181453
8735	TAG53:1-FA17:0		TAG Ester	53725	DMS-MS	100009873							2.1532	1.3269	0.9538	1.3345	0.4796	2.9031	0.0794	1.0104	2.3041	2.847	5.9851	1.0359	0.0746	4.3216	1.23991	1.73481	0.623464	3.77394	0.103217	1.31349	1.73645	2.1456	4.51059	0.780692	0.0562213	3.25691		0.703867	0.0660759	0.175205
8736	TAG53:1-FA18:0		TAG Ester	54424	DMS-MS	100010572							2.30445	1.38583	0.9331	1.3	0.5227	2.8234	0.0865	0.9645	1.9714	3.4241	6.663	1.1271	0.0809	4.4272	1.67628	2.3354	0.93901	5.07213	0.155394	1.73269	1.42254	2.47079	4.80794	0.813301	0.0583764	3.19461		0.932904	0.0669081	0.175205
8737	TAG53:1-FA18:1		TAG Ester	54603	DMS-MS	100010751							1.73942	1.69165	0.8054	0.9342	0.2916	2.3987	0.0527	1.1212	2.7254	3.5589	7.9971	1.0658	0.0635	5.4541	1.49379	1.73267	0.540835	4.4489	0.0977434	2.07951	1.61109	2.1038	4.7274	0.630036	0.0375373	3.22413		0.842667	0.084256	0.181453
8747	TAG53:2-FA16:0		TAG Ester	54253	DMS-MS	100010401							2.54753	2.47945	0.8905	0.932	0.2449	2.8217	0.0524	2.2841	3.2063	5.4227	9.7714	1.4305	0.079	8.1088	1.11729	1.16936	0.307271	3.54033	0.0657452	2.86581	1.29315	2.18706	3.94095	0.576942	0.0318619	3.2704		0.802258	0.0746403	0.176735
8749	TAG53:2-FA17:0		TAG Ester	54254	DMS-MS	100010402							1.86403	1.30588	0.9237	1.1383	0.3704	2.7165	0.0709	1.0225	2.3774	2.5314	4.7838	0.9775	0.0586	3.7775	1.14433	1.41018	0.45887	3.36534	0.0878345	1.26672	1.82053	1.93846	3.66327	0.748535	0.0448738	2.89268		0.696168	0.0646569	0.175205
8750	TAG53:2-FA18:0		TAG Ester	53726	DMS-MS	100009874							2.17117	1.2401	1.0189	1.3137	0.5222	3.0757	0.1095	1.2243	2.0064	2.6043	4.2511	0.9811	0.0943	3.5061	4.21556	5.43525	2.16053	12.7253	0.453041	5.06537	1.61793	2.10007	3.42803	0.791146	0.0760423	2.82727		2.77248	0.0593159	0.174063
8751	TAG53:2-FA18:1		TAG Ester	54425	DMS-MS	100010573							1.7953	1.4548	0.8243	1.0264	0.3403	2.5606	0.0672	0.9745	2.6943	2.7929	5.263	1.0255	0.0639	4.5397	0.8243	1.0264	0.3403	2.5606	0.0672	0.9745	1.85201	1.91978	3.61768	0.704908	0.0439236	3.1205		0.514558	0.0624819	0.175205
8752	TAG53:2-FA18:2		TAG Ester	53727	DMS-MS	100009875							1.79667	1.88673	0.7328	1.0342	0.3735	3.0272	0.0588	2.7985	2.1903	4.1301	6.9362	0.9658	0.081	6.072	2.39243	3.37643	1.21939	9.88312	0.191969	9.13647	1.1609	2.18902	3.6763	0.51189	0.0429313	3.21826		2.42606	0.156174	0.225344
8761	TAG53:3-FA16:0		TAG Ester	54255	DMS-MS	100010403							1.99328	2.25378	1.3701	0.7582	0.2273	2.6337	0.0566	3.483	2.3585	5.1843	7.323	1.0803	0.0707	7.0918	1.93955	1.07333	0.321772	3.72834	0.0801246	4.93063	1.04646	2.30027	3.2492	0.479327	0.0313695	3.14662		1.17755	0.15638	0.225344
8763	TAG53:3-FA17:0		TAG Ester	54067	DMS-MS	100010215							2.00145	1.339	0.8925	1.2412	0.3792	3.1426	0.0683	2.1571	1.8167	2.9336	3.7201	0.8228	0.0613	4.0374	0.8925	1.2412	0.3792	3.1426	0.0683	2.1571	1.35676	2.19089	2.77827	0.614488	0.0457804	3.01524		0.787978	0.103462	0.190742
8764	TAG53:3-FA18:0		TAG Ester	53728	DMS-MS	100009876							1.55748	1.03643	1.0197	1.1562	0.8162	1.8513	0.6541	1.231	1.2713	1.5835	1.7359	0.9803	0.647	2.0242	3.02761	3.4329	2.4234	5.49673	1.9421	3.65499	1.22661	1.52784	1.67488	0.94584	0.624256	1.95304		2.51214	0.0299232	0.170466
8765	TAG53:3-FA18:1		TAG Ester	53389	DMS-MS	100009537							1.89412	1.36583	1.0473	1.1156	0.3442	2.6917	0.088	1.2202	2.8032	2.4412	3.7763	0.9527	0.0932	4.1796	1.39795	1.48912	0.459444	3.59293	0.117464	1.62874	2.05237	1.78733	2.76483	0.697523	0.0682367	3.06011		0.832724	0.0595848	0.174063
8766	TAG53:3-FA18:2		TAG Ester	53390	DMS-MS	100009538							1.76098	1.46163	0.773	1.1229	0.3533	2.8664	0.0571	2.1765	1.8412	3.0601	3.8899	0.8771	0.0625	4.3213	0.944949	1.37268	0.431889	3.50401	0.0698016	2.66065	1.25969	2.09362	2.66134	0.600082	0.0427604	2.95649		0.934472	0.131907	0.212239
8774	TAG53:4-FA16:0		TAG Ester	53391	DMS-MS	100009539							2.27935	3.01038	2.0016	0.7583	0.3023	2.8267	0.1351	7.0695	2.3286	7.0827	10.8072	1.2748	0.1263	8.2373	2.91651	1.10491	0.440478	4.11875	0.196853	10.3009	0.773523	2.35276	3.58997	0.423468	0.0419548	2.7363		1.92362	0.376323	0.34543
8776	TAG53:4-FA17:0		TAG Ester	54426	DMS-MS	100010574							2.00982	1.51855	0.7951	1.2049	0.3764	3.6164	0.0671	5.0742	1.3506	3.4802	3.5788	0.7116	0.0602	3.9966	0.827281	1.25367	0.391635	3.76277	0.0698158	5.27958	0.889401	2.29179	2.35672	0.468605	0.0396431	2.63185		1.33495	0.413104	0.364704
8777	TAG53:4-FA18:0		TAG Ester	53565	DMS-MS	100009713							1.4539	1.20667	0.8457	0.9944	0.8591	1.2392	0.7562	1.6326	1.2184	1.6458	1.9076	0.6713	0.7945	1.6125	1.14017	1.34064	1.15823	1.67068	1.0195	2.20106	1.00972	1.36392	1.58088	0.556326	0.658425	1.33633		1.31122	0.100246	0.190681
8778	TAG53:4-FA18:1		TAG Ester	53392	DMS-MS	100009540							1.94705	1.36213	1.0708	1.1638	0.4644	2.7131	0.2797	1.8839	2.1188	2.3386	2.7029	0.9292	0.2725	3.9395	1.34944	1.46664	0.585243	3.41908	0.352482	2.37412	1.5555	1.71687	1.98431	0.682165	0.200054	2.89215		1.05713	0.0880387	0.181453
8779	TAG53:4-FA18:2		TAG Ester	54256	DMS-MS	100010404							2.11658	1.48557	0.9646	1.1937	0.3573	3.1637	0.0694	3.0273	2.0998	2.938	3.2319	0.8364	0.0748	4.5921	3.35377	4.15032	1.24228	10.9997	0.241293	10.5255	1.41347	1.9777	2.17553	0.563017	0.0503512	3.09114		3.29114	0.140654	0.218773
8780	TAG53:4-FA18:3		TAG Ester	53729	DMS-MS	100009877							1.55338	2.16865	0.8348	0.9639	0.2647	2.819	0.0586	4.0803	1.9019	4.4442	5.8198	1.0753	0.0754	5.5324	0.964418	1.11356	0.305799	3.2567	0.0676987	4.71384	0.876997	2.04929	2.68361	0.495838	0.0347682	2.55108		1.19909	0.457751	0.382519
8784	TAG53:4-FA20:4		TAG Ester	53903	DMS-MS	100010051							2.3862	2.62968	1.5772	1.9327	2.0336	2.8295	0.9264	10.991	0.2242	0.2242	0.2242	0.2242	0.463	0.2242	1.88161	2.30573	2.4261	3.37562	1.1052	13.1124	0.0852574	0.0852574	0.0852574	0.0852574	0.176067	0.0852574		40.1867	0.0972897	0.188712
8793	TAG53:5-FA18:1		TAG Ester	54427	DMS-MS	100010575							1.27972	1.26303	0.9738	1.0262	0.8063	1.8227	0.6849	2.0176	1.4717	2.0543	1.9822	1.0303	0.6876	2.6063	1.31087	1.38141	1.08539	2.4536	0.921969	2.71597	1.16521	1.62648	1.5694	0.815735	0.544404	2.06352		1.26776	0.267505	0.290813
8794	TAG53:5-FA18:2		TAG Ester	54257	DMS-MS	100010405							1.8251	1.34185	0.9487	1.2735	0.5743	2.7455	0.3946	3.7424	1.3385	2.5436	2.1295	0.9001	0.4031	3.5778	1.25384	1.68311	0.75902	3.62857	0.521521	4.94612	0.997503	1.89559	1.58699	0.67079	0.300406	2.66632		1.57586	0.336484	0.329962
8795	TAG53:5-FA18:3		TAG Ester	53730	DMS-MS	100009878							1.69767	2.15545	0.8771	1.2078	0.3224	3.6518	0.0895	6.2173	2.0664	4.7742	4.0064	1.0492	0.1107	5.647	4.48874	6.18117	1.64995	18.6888	0.458035	31.8183	0.958686	2.21494	1.85873	0.486766	0.0513582	2.61987		7.72678	0.836686	0.542222
8798	TAG53:5-FA20:4		TAG Ester	53731	DMS-MS	100009879							1.78	1.78975	1.2045	1.285	1.0346	2.8772	0.7258	6.9933	1.2079	1.2192	1.6763	0.146	0.2641	1.7281	1.26616	1.35078	1.08756	3.02449	0.762956	7.35131	0.674899	0.681212	0.936611	0.0815756	0.147563	0.965554		4.25624	0.243478	0.278156
8808	TAG53:6-FA18:1		TAG Ester	53904	DMS-MS	100010052							1.12073	1.0596	1.0068	0.9932	0.8209	1.177	0.7089	1.6315	1.3882	1.7591	2.2242	1.2314	0.7595	1.4837	1.79321	1.76899	1.46211	2.09636	1.26262	2.90587	1.31012	1.66015	2.09909	1.16214	0.71678	1.40025		1.35223	0.0787065	0.178685
8809	TAG53:6-FA18:2		TAG Ester	54428	DMS-MS	100010576							1.42563	1.5062	0.9821	0.9262	0.6422	2.1559	0.5185	5.834	1.199	2.7814	2.2341	1.018	0.51	3.6056	1.01065	0.953126	0.66087	2.21857	0.533573	6.0036	0.796043	1.84663	1.48327	0.675873	0.3386	2.39384		1.51049	0.956943	0.581619
8810	TAG53:6-FA18:3		TAG Ester	53566	DMS-MS	100009714							1.20397	1.26658	0.9909	1.1182	0.8241	1.7859	0.6392	3.5036	1.1395	2.116	1.8729	1.1016	0.7178	2.7064	1.45166	1.63815	1.2073	2.61632	0.93642	5.13273	0.899664	1.67064	1.4787	0.869741	0.566721	2.13677		1.70325	0.922414	0.573504
8812	TAG53:6-FA20:4		TAG Ester	53567	DMS-MS	100009715							1.94132	1.29048	2.1168	2.1336	1.3923	6.3364	0.6228	18.7253	2.5577	0.1271	0.1271	0.1271	0.2668	0.1271	2.77559	2.79761	1.82561	8.3084	0.816626	24.5529	1.98197	0.0984902	0.0984902	0.0984902	0.206744	0.0984902		15.9047	0.183978	0.239953
8822	TAG53:7-FA18:3		TAG Ester	54258	DMS-MS	100010406							1.01027	0.9781	1.2029	1.7704	1	0.7207	0.8319	4.4684	2.3832	3.6039	0.7207	1.7579	0.7921	4.6734	1.48684	2.18829	1.23604	0.890816	1.02826	5.52313	2.43656	3.68459	0.736837	1.79726	0.809835	4.77804		0.867323	0.425991	0.367857
8831	TAG54:0-FA16:0		TAG Ester	53732	DMS-MS	100009880							1.81475	1.66955	0.7057	0.8272	0.3479	1.6144	0.0942	1.3377	2.3169	2.7598	6.4683	1.2323	0.1493	5.0282	0.700389	0.820974	0.345282	1.60225	0.093491	1.32763	1.38774	1.65302	3.87428	0.738103	0.0894253	3.01171		0.454705	0.0682811	0.175205
8833	TAG54:0-FA18:0		TAG Ester	54068	DMS-MS	100010216							2.08535	0.851867	0.7493	1.8716	0.6918	2.7814	0.1361	0.5093	1.1983	1.9449	4.0737	1.2736	0.1907	2.3279	0.7493	1.8716	0.6918	2.7814	0.1361	0.5093	1.40668	2.2831	4.78209	1.49507	0.223861	2.7327		0.521492	0.0506665	0.17396
8842	TAG54:1-FA16:0		TAG Ester	54429	DMS-MS	100010577							1.69863	1.5596	0.7634	0.9761	0.3353	2.1796	0.0705	1.0239	2.4426	2.7055	5.41	1.4332	0.1305	4.7625	1.68484	2.15427	0.740013	4.81042	0.155595	2.25977	1.56617	1.73474	3.46884	0.918954	0.0836753	3.05367		1.09042	0.0579638	0.17396
8845	TAG54:1-FA18:0		TAG Ester	54069	DMS-MS	100010217							2.23207	0.928167	0.9437	1.7574	0.6781	3.1726	0.1092	0.5449	1.8528	2.2386	4.693	1.3661	0.1104	2.9341	1.06362	1.98073	0.764272	3.57577	0.123077	0.614145	1.99619	2.41185	5.0562	1.47183	0.118944	3.16118		0.571293	0.0424019	0.17396
8846	TAG54:1-FA18:1		TAG Ester	53568	DMS-MS	100009716							2.10102	0.98665	0.9626	1.6371	0.5928	2.9973	0.1003	0.5887	2.2084	2.4276	5.0023	1.4655	0.1033	3.3655	1.3673	2.32537	0.842026	4.25743	0.142468	0.836202	2.23828	2.46045	5.06998	1.48533	0.104698	3.41104		0.66154	0.0381049	0.17396
8847	TAG54:1-FA20:0		TAG Ester	54430	DMS-MS	100010578							2.51045	1.2261	1.0243	0.9008	0.2244	2.1103	0.0558	1.397	2.6588	2.281	5.1611	1.3541	0.0711	5.6927	1.77169	1.55807	0.388135	3.65009	0.0965147	2.41633	2.1685	1.86037	4.20936	1.1044	0.0579887	4.64293		0.703585	0.0421734	0.17396
8848	TAG54:1-FA20:1		TAG Ester	54431	DMS-MS	100010579							1.71155	1.2485	0.8881	1.1897	0.442	2.4411	0.0871	0.8162	2.2627	2.5209	4.5489	1.4575	0.1504	4.0132	0.890862	1.1934	0.443374	2.44869	0.0873708	0.818738	1.81233	2.01914	3.64349	1.1674	0.120465	3.21442		0.491134	0.0431293	0.17396
8868	TAG54:2-FA16:0		TAG Ester	53733	DMS-MS	100009881							1.61653	1.31725	0.9643	1.0357	0.3753	2.3765	0.0785	0.8324	2.405	2.588	4.1738	1.4005	0.1122	4.2834	1.6546	1.77711	0.64396	4.07773	0.134695	1.42828	1.82577	1.9647	3.16857	1.0632	0.0851775	3.25177		0.855375	0.046993	0.17396
8871	TAG54:2-FA18:0		TAG Ester	54259	DMS-MS	100010407							2.23717	1.0508	1.0737	1.6022	0.5734	3.1895	0.1013	0.7047	2.4721	2.621	4.8851	1.5023	0.096	3.4952	1.0737	1.6022	0.5734	3.1895	0.1013	0.7047	2.35259	2.49429	4.64893	1.42967	0.091359	3.32623		0.505108	0.0325892	0.171135
8872	TAG54:2-FA18:1		TAG Ester	54070	DMS-MS	100010218							2.04742	1.0831	1.0547	1.3851	0.485	2.8555	0.0888	0.6513	2.8272	2.4801	4.6824	1.443	0.0878	3.506	1.35186	1.77535	0.621649	3.66004	0.113819	0.834804	2.61029	2.28982	4.32315	1.33229	0.0810636	3.237		0.602405	0.0306224	0.171135
8873	TAG54:2-FA18:2		TAG Ester	54432	DMS-MS	100010580							2.02847	0.967267	0.7589	1.5325	0.5557	3.1683	0.0895	1.2598	1.3428	2.4575	3.3591	1.1064	0.0997	3.0866	0.891722	1.80072	0.652958	3.72281	0.105164	1.48029	1.38824	2.54066	3.47278	1.14384	0.103074	3.19105		0.730905	0.0517051	0.17396
8875	TAG54:2-FA20:0		TAG Ester	53905	DMS-MS	100010053							2.09783	1.5795	0.8471	0.9228	0.2318	2.3292	0.0491	2.2996	3.6711	2.9024	5.5601	1.3978	0.0848	7.2384	1.22697	1.33662	0.335747	3.3737	0.0711182	3.33082	2.32422	1.83754	3.52016	0.884964	0.0536879	4.58272		0.73277	0.0577443	0.17396
8876	TAG54:2-FA20:1		TAG Ester	53393	DMS-MS	100009541							1.65197	1.40225	0.8482	1.1795	0.4076	2.5651	0.0716	0.9072	2.8419	2.8108	4.6116	1.5994	0.124	5.229	0.850738	1.18303	0.40882	2.57278	0.0718142	0.909915	2.02667	2.00449	3.28871	1.1406	0.0884293	3.72901		0.488446	0.0467461	0.17396
8877	TAG54:2-FA20:2		TAG Ester	53394	DMS-MS	100009542							2.00727	1.20147	1.0034	1.78	0.7739	3.4103	0.159	0.86	1.4426	2.3628	3.5062	0.8799	0.2295	2.9838	0.941467	1.67013	0.726133	3.19981	0.149186	0.806918	1.2007	1.9666	2.91827	0.732355	0.191017	2.48346		0.789436	0.0984393	0.189739
8884	TAG54:3-FA16:0		TAG Ester	53569	DMS-MS	100009717							1.45383	1.15472	0.7796	1.2425	0.4167	2.804	0.0753	1.1611	1.594	2.4394	2.9943	0.9898	0.1084	3.8111	0.697119	1.11104	0.372614	2.50734	0.0673333	1.03826	1.38043	2.11255	2.5931	0.85718	0.0938758	3.30046		0.56045	0.11327	0.199704
8885	TAG54:3-FA16:1		TAG Ester	54260	DMS-MS	100010408							1.34287	1.9197	0.925	0.871	0.2663	2.4379	0.0627	1.075	4.7125	2.9252	5.2328	1.4937	0.1119	6.9194	1.28511	1.21009	0.369972	3.38699	0.0871095	1.4935	2.45481	1.52378	2.72584	0.77809	0.0582904	3.60442		0.702792	0.0918872	0.183535
8887	TAG54:3-FA18:0		TAG Ester	54604	DMS-MS	100010752							2.30928	1.13952	0.9898	1.6142	0.5256	3.504	0.0883	1.4756	1.7346	2.7332	3.8333	1.1943	0.0903	3.7657	1.23555	2.01498	0.656098	4.37399	0.110223	1.84197	1.52222	2.39856	3.36397	1.04808	0.0792441	3.30465		0.87335	0.0519097	0.17396
8888	TAG54:3-FA18:1		TAG Ester	53906	DMS-MS	100010054							1.9849	1.2963	1.0866	1.2596	0.3402	2.7827	0.0815	0.8051	3.5998	2.5858	4.7907	1.4039	0.0856	4.2946	1.28958	1.4949	0.40375	3.30252	0.0967244	0.955495	2.77698	1.99475	3.69567	1.08301	0.0660341	3.31297		0.583396	0.0344226	0.173484
8889	TAG54:3-FA18:2		TAG Ester	54433	DMS-MS	100010581							2.19013	1.15655	0.898	1.4792	0.4946	3.2718	0.079	1.4951	1.9249	2.6217	3.5843	1.1502	0.0848	3.8964	1.05191	1.73273	0.579372	3.83257	0.0925402	1.75135	1.66435	2.26683	3.09913	0.99451	0.0733215	3.36899		0.788382	0.050676	0.17396
8890	TAG54:3-FA18:3		TAG Ester	54605	DMS-MS	100010753							1.53833	0.99915	0.7135	1.2302	0.3699	2.4989	0.0664	1.6313	1.1168	2.5282	3.3224	1.0186	0.0776	3.5555	0.839873	1.44809	0.435416	2.9415	0.0781606	1.92023	1.11775	2.53035	3.32523	1.01947	0.077666	3.55852		0.65898	0.0895913	0.181453
8892	TAG54:3-FA20:1		TAG Ester	54434	DMS-MS	100010582							1.34775	1.5661	0.7178	1.0281	0.3356	2.4844	0.0532	1.3045	3.0293	2.8286	4.1641	1.2982	0.1067	5.4851	0.775288	1.11044	0.362478	2.68337	0.0574607	1.40898	1.9343	1.80614	2.6589	0.828938	0.068131	3.50239		0.592474	0.0989084	0.189739
8893	TAG54:3-FA20:2		TAG Ester	54261	DMS-MS	100010409							1.83815	1.19378	1.1004	1.7285	0.5703	3.7298	0.1103	0.9928	1.8345	2.3331	3.4916	0.9773	0.1171	3.6172	1.35807	2.13325	0.703842	4.60318	0.136128	1.22528	1.53671	1.95437	2.92482	0.818658	0.0980915	3.03003		0.980416	0.112126	0.198168
8894	TAG54:3-FA20:3		TAG Ester	53395	DMS-MS	100009543							1.42477	1.47162	1.0371	1.3547	0.5461	2.7883	0.2552	1.9619	1.5119	2.1719	2.7079	0.8464	0.2162	2.3639	1.08432	1.41638	0.570966	2.91526	0.26682	2.05123	1.02737	1.47586	1.84009	0.57515	0.146913	1.60633		1.24481	0.63938	0.475151
8900	TAG54:4-FA16:0		TAG Ester	53734	DMS-MS	100009882							1.62773	1.21263	1.0269	1.5504	0.5531	3.4643	0.1966	2.1057	1.2461	2.3604	2.5246	0.7186	0.1421	2.9583	0.96978	1.46416	0.522334	3.2716	0.185664	1.98857	1.0276	1.94651	2.08192	0.592595	0.117183	2.43957		1.02398	0.365815	0.340589
8901	TAG54:4-FA16:1		TAG Ester	53570	DMS-MS	100009718							1.49022	1.67765	0.8801	1.1675	0.3073	3.114	0.0654	1.6356	3.1553	2.8826	3.7032	1.0758	0.0922	5.9126	0.956474	1.26881	0.333967	3.38423	0.0710754	1.77754	1.88079	1.71824	2.20737	0.641254	0.0549578	3.52433		0.777116	0.172601	0.234066
8903	TAG54:4-FA18:0		TAG Ester	53907	DMS-MS	100010055							2.2127	1.20287	0.8269	1.5427	0.5146	3.7306	0.0885	3.1827	1.23	3.1653	3.1619	0.9764	0.0924	3.8849	0.849409	1.58469	0.528608	3.83215	0.0909091	3.26934	1.02256	2.63146	2.62864	0.811728	0.0768165	3.2297		0.976368	0.13034	0.212239
8904	TAG54:4-FA18:1		TAG Ester	54435	DMS-MS	100010583							2.13472	1.36412	0.94	1.2453	0.357	3.0533	0.0671	1.7434	2.6081	2.808	3.7453	1.1049	0.0744	4.3627	1.62761	2.15624	0.618146	5.28679	0.116184	3.0187	1.91193	2.05847	2.74559	0.809975	0.0545408	3.19819		1.18972	0.0541183	0.17396
8905	TAG54:4-FA18:2		TAG Ester	54262	DMS-MS	100010410							2.09527	1.27512	0.9293	1.2434	0.3629	3.0541	0.0675	1.7946	2.4418	2.7579	3.4709	1.0571	0.0731	4.2142	0.916424	1.22617	0.357872	3.01178	0.0665648	1.76974	1.91496	2.16286	2.72203	0.829022	0.0573281	3.30495		0.668588	0.054635	0.17396
8906	TAG54:4-FA18:3		TAG Ester	54436	DMS-MS	100010584							1.47333	1.19208	0.7258	1.0198	0.3062	2.6096	0.056	2.0353	1.4177	2.8417	3.2815	0.9802	0.0707	3.9215	0.807671	1.13483	0.34074	2.90397	0.0623169	2.26488	1.18926	2.38381	2.75274	0.822258	0.0593079	3.28962		0.715863	0.129536	0.212239
8908	TAG54:4-FA20:1		TAG Ester	54263	DMS-MS	100010411							1.24782	1.72283	0.6779	0.971	0.2607	2.5388	0.0518	1.8326	3.1359	3.1943	3.8466	1.1841	0.0966	6.2005	0.665391	0.953082	0.255889	2.49195	0.0508441	1.79878	1.8202	1.8541	2.23272	0.687298	0.0560704	3.59901		0.606469	0.183426	0.239591
8909	TAG54:4-FA20:2		TAG Ester	53908	DMS-MS	100010056							1.72212	1.30232	0.9818	1.557	0.4402	3.5935	0.087	1.5763	2.0985	2.5697	3.0857	0.911	0.0952	4.0583	2.94658	4.67287	1.32113	10.7848	0.261104	4.73079	1.61136	1.97318	2.36939	0.699523	0.0731005	3.11622		2.51121	0.154543	0.22428
8910	TAG54:4-FA20:3		TAG Ester	53909	DMS-MS	100010057							1.34092	1.31222	1.1102	1.2137	0.3882	2.9318	0.1355	2.1948	1.8402	2.6865	3.5751	0.9134	0.1198	3.3861	1.25745	1.37467	0.439687	3.32065	0.153472	2.4859	1.40236	2.0473	2.72447	0.696074	0.0912959	2.58044		0.946539	0.294353	0.30454
8911	TAG54:4-FA20:4		TAG Ester	54437	DMS-MS	100010585							1.99993	2.17645	1.9433	2.1837	0.8635	4.0554	0.9563	6.8917	1.0053	1.3013	1.4314	0.4384	0.2361	1.1612	2.37761	2.67174	1.05648	4.96175	1.17002	8.43193	0.461899	0.5979	0.657676	0.201429	0.108479	0.533529		8.07116	0.0921381	0.183638
8912	TAG54:4-FA22:1		TAG Ester	54438	DMS-MS	100010586							2.06927	1.26587	1.0059	1.1981	0.3634	2.7857	0.0705	1.6187	2.5071	2.7273	3.6072	1.0714	0.0734	4.3631	1.22026	1.45342	0.440841	3.37934	0.0855237	1.96365	1.98054	2.15449	2.84959	0.846377	0.057984	3.44673		0.753638	0.0496216	0.17396
8913	TAG54:4-FA22:4		TAG Ester	53571	DMS-MS	100009719							1.39822	1.56707	1.5308	1.8775	1.2091	2.7733	1.0119	3.242	0.6547	1.076	1.3253	0.5581	0.7545	1.026	1.65185	2.02597	1.30471	2.99261	1.09192	3.49837	0.417787	0.686633	0.84572	0.356143	0.481473	0.654726		3.65011	0.0244842	0.168247
8918	TAG54:5-FA16:0		TAG Ester	54439	DMS-MS	100010587							1.31737	1.10713	1.136	1.3525	0.4215	3.5028	0.223	5.4618	1.0946	2.0106	2.1904	0.5363	0.1363	2.2651	1.93724	2.30645	0.718793	5.9734	0.380286	9.31412	0.988679	1.81604	1.97844	0.484404	0.123111	2.04591		2.77416	0.697024	0.493793
8919	TAG54:5-FA16:1		TAG Ester	53735	DMS-MS	100009883							1.68922	1.6732	1.0581	1.5807	0.3259	4.1149	0.1227	3.4221	2.631	2.8864	2.9918	0.903	0.1028	5.2694	1.00564	1.50233	0.309742	3.91088	0.116617	3.25243	1.57244	1.72508	1.78807	0.539684	0.0614392	3.14929		1.14278	0.491765	0.401078
8921	TAG54:5-FA18:0		TAG Ester	54440	DMS-MS	100010588							1.5783	1.38395	0.7676	1.1319	0.3321	3.0878	0.0785	4.4853	1.1081	3.6791	3.1208	0.9896	0.0878	4.3422	1.12195	1.65442	0.485408	4.51323	0.114738	6.55586	0.800679	2.65841	2.25499	0.715055	0.0634416	3.13754		1.50004	0.428392	0.368658
8922	TAG54:5-FA18:1		TAG Ester	53736	DMS-MS	100009884							2.27917	1.52962	0.9698	1.2718	0.3523	3.5028	0.064	4.0947	1.9496	3.193	3.1336	0.9969	0.0771	5.0852	1.59594	2.09292	0.579759	5.76434	0.105321	6.7384	1.27457	2.08745	2.04862	0.651732	0.0504048	3.32449		1.7883	0.180751	0.239131
8923	TAG54:5-FA18:2		TAG Ester	53910	DMS-MS	100010058							2.28895	1.4093	0.8719	1.2781	0.3487	3.5272	0.0593	4.0968	1.7564	2.9729	2.8004	0.9242	0.0724	4.4978	0.912491	1.3376	0.364933	3.69141	0.0620607	4.28752	1.24629	2.10949	1.98709	0.655787	0.051373	3.19151		1.15306	0.182076	0.239537
8924	TAG54:5-FA18:3		TAG Ester	54441	DMS-MS	100010589							1.75002	1.60313	0.8971	1.1029	0.2997	2.9944	0.0604	3.2728	2.1593	3.3336	3.8098	1.1249	0.0833	5.4652	1.07575	1.32253	0.359381	3.59069	0.0724279	3.92453	1.34692	2.07943	2.37647	0.701688	0.0519607	3.40907		1.03811	0.189789	0.244416
8927	TAG54:5-FA20:2		TAG Ester	53396	DMS-MS	100009544							1.83177	1.57118	0.9829	1.5157	0.3587	4.0443	0.0829	2.8965	2.1274	2.8941	3.089	0.8352	0.0863	5.297	1.15103	1.77496	0.420056	4.73608	0.0970802	3.39195	1.35401	1.84199	1.96603	0.531574	0.0549268	3.37134		1.26878	0.319322	0.31949
8928	TAG54:5-FA20:3		TAG Ester	53737	DMS-MS	100009885							1.45158	1.55108	1.0815	1.2081	0.3194	3.2032	0.1183	4.1175	2.2682	3.1737	3.2995	0.9185	0.1149	4.5119	1.61466	1.80367	0.476859	4.78232	0.17662	6.14736	1.46233	2.04612	2.12722	0.592167	0.0740773	2.90887		1.62869	0.556005	0.437345
8929	TAG54:5-FA20:4		TAG Ester	54264	DMS-MS	100010412							1.40392	1.25577	1.5244	1.5829	0.4718	3.8716	0.3181	8.9352	1.5207	1.5912	2.0337	0.5077	0.1448	1.5192	1.42146	1.47601	0.439941	3.61016	0.29662	8.33184	1.21097	1.26711	1.61949	0.404295	0.115308	1.20978		2.6731	0.344203	0.333033
8930	TAG54:5-FA20:5		TAG Ester	54265	DMS-MS	100010413							1.48008	1.24728	0.9152	0.0494	0.2756	3.196	0.2126	5.1811	0.0494	2.328	5.7686	0.0494	0.0966	3.0961	0.700533	0.0378129	0.210956	2.44636	0.162733	3.96584	0.0396061	1.86646	4.62493	0.0396061	0.0774483	2.48227		0.824092	0.672725	0.485875
8931	TAG54:5-FA22:1		TAG Ester	54442	DMS-MS	100010590							2.40238	1.58453	0.9264	1.3699	0.4016	3.773	0.0653	4.229	2.0932	3.3169	3.0794	0.9671	0.0831	5.6225	1.22523	1.8118	0.531147	4.99008	0.0863642	5.59318	1.32102	2.0933	1.94341	0.610337	0.0524445	3.54836		1.48793	0.185684	0.241494
8932	TAG54:5-FA22:4		TAG Ester	54071	DMS-MS	100010219							1.36222	1.39325	1.0613	1.59	0.5579	3.166	0.4718	3.0449	1.2926	1.6681	2.5426	0.5286	0.4615	2.1902	1.33679	2.00273	0.702719	3.98782	0.594269	3.83529	0.927759	1.19727	1.82494	0.379401	0.33124	1.57201		1.9991	0.704244	0.494259
8933	TAG54:5-FA22:5		TAG Ester	54606	DMS-MS	100010754							1.57068	1.25157	1.1994	1.952	0.6272	3.4786	0.4684	4.5971	0.8117	2.2686	2.3073	0.6071	0.2532	1.5216	1.36249	2.21743	0.712484	3.95161	0.532091	5.2222	0.648547	1.81261	1.84353	0.485072	0.202306	1.21576		2.25495	0.610941	0.459603
8938	TAG54:6-FA16:0		TAG Ester	53572	DMS-MS	100009720							1.28238	1.1427	1.3904	1.4002	0.5026	3.8965	0.3948	13.4084	0.9663	1.9938	1.8887	0.4313	0.1858	1.8445	1.76171	1.77413	0.636821	4.93707	0.500232	16.9891	0.845629	1.74481	1.65284	0.377439	0.162597	1.61416		4.15775	0.349887	0.3356
8939	TAG54:6-FA16:1		TAG Ester	53738	DMS-MS	100009886							1.44663	1.7879	1.2691	1.7054	0.3291	5.0223	0.1567	9.2167	3.0804	3.0395	3.0808	0.7889	0.1152	4.2903	1.22927	1.65188	0.318772	4.86468	0.151782	8.92745	1.72292	1.70004	1.72314	0.441244	0.0644331	2.39963		2.1293	0.535062	0.426324
8942	TAG54:6-FA18:1		TAG Ester	54072	DMS-MS	100010220							1.85292	2.03662	0.8961	1.1747	0.3159	3.7414	0.0643	7.99	1.98	4.6959	3.9889	1.1818	0.0971	7.0321	1.05818	1.38717	0.373037	4.41811	0.0759299	9.43515	0.972201	2.30574	1.95859	0.580276	0.0476771	3.45283		1.79747	0.750343	0.510278
8943	TAG54:6-FA18:2		TAG Ester	54073	DMS-MS	100010221							2.38767	1.61875	0.8147	1.3056	0.36	4.1811	0.0615	10.224	1.4417	4.1912	2.7735	0.9031	0.0836	5.877	0.789081	1.26454	0.34868	4.04962	0.0595661	9.9025	0.890625	2.58916	1.71336	0.5579	0.0516448	3.63058		1.74001	0.663304	0.483104
8944	TAG54:6-FA18:3		TAG Ester	53739	DMS-MS	100009887							1.84903	1.91402	0.8213	1.1227	0.2858	3.7351	0.0594	7.8388	1.8446	4.5241	3.7316	1.1756	0.0918	6.8162	0.957003	1.3082	0.333023	4.35225	0.0692146	9.134	0.963732	2.36367	1.94962	0.614206	0.047962	3.5612		1.70032	0.702769	0.494259
8948	TAG54:6-FA20:3		TAG Ester	54074	DMS-MS	100010222							1.48193	1.95692	1.0895	1.1859	0.2757	3.7394	0.1086	8.4524	2.6821	3.7315	3.7723	0.9713	0.1097	5.854	0.88917	0.967845	0.225006	3.05182	0.0886314	6.89823	1.37057	1.90683	1.92768	0.496342	0.0560576	2.99144		1.3854	0.835233	0.541989
8949	TAG54:6-FA20:4		TAG Ester	53911	DMS-MS	100010059							1.34903	1.25532	1.5396	1.4458	0.4296	4.1379	0.2784	16.7763	1.874	1.8746	2.0934	0.4314	0.1272	1.8073	1.17055	1.09923	0.326622	3.14601	0.211665	12.7549	1.49285	1.49333	1.66763	0.343658	0.101329	1.43972		2.86135	0.3603	0.338856
8950	TAG54:6-FA20:5		TAG Ester	54607	DMS-MS	100010755							1.72967	2.01352	1.0283	0.9684	0.2235	3.1422	0.1346	7.5171	1.6938	3.7143	9.4084	0.9014	0.0953	5.6362	1.21942	1.14839	0.265041	3.72622	0.159617	8.91426	0.841215	1.84468	4.67262	0.447674	0.0473301	2.79918		1.44874	0.604454	0.456963
8953	TAG54:6-FA22:5		TAG Ester	53397	DMS-MS	100009545							1.45925	1.46183	1.0436	1.5267	0.4217	4.2447	0.2823	6.6825	1.4598	2.1964	2.4713	0.657	0.1852	2.8458	1.07289	1.56955	0.433536	4.36383	0.290223	6.87005	0.998609	1.5025	1.69055	0.449436	0.12669	1.94673		2.17441	0.53772	0.426324
8954	TAG54:6-FA22:6		TAG Ester	54608	DMS-MS	100010756							1.92323	1.26453	2.024	2.1617	0.8581	4.6277	0.7297	9.7185	1.0158	2.0508	1.6884	0.5526	0.4092	1.7172	1.23129	1.31506	0.522022	2.81525	0.44391	5.91222	0.8033	1.62178	1.3352	0.436999	0.323598	1.35797		2.082	0.353146	0.336779
8959	TAG54:7-FA16:1		TAG Ester	54266	DMS-MS	100010414							1.33837	1.62798	1.3897	1.9243	0.3433	5.4704	0.2643	21.0545	2.5973	2.2658	2.9295	0.6075	0.1359	3.6994	0.62889	0.870816	0.155356	2.47556	0.119605	9.52793	1.59541	1.39178	1.79947	0.373161	0.0834775	2.27238		1.83325	0.351547	0.336491
8961	TAG54:7-FA18:1		TAG Ester	53573	DMS-MS	100009721							1.58427	2.28813	0.7418	0.8417	0.281	3.0134	0.057	8.5627	2.4565	5.3126	6.6329	1.2494	0.112	7.7262	0.29083	0.329996	0.110169	1.18143	0.0223474	3.35709	1.07358	2.32181	2.89883	0.546035	0.0489482	3.37664		0.515483	0.779178	0.521415
8962	TAG54:7-FA18:2		TAG Ester	54075	DMS-MS	100010223							1.77783	2.17988	0.796	1.1282	0.2851	3.9216	0.061	18.8651	1.4764	6.4473	3.4022	1.0267	0.1095	7.4503	0.662533	0.939032	0.237297	3.26406	0.050772	15.7019	0.677284	2.95764	1.56073	0.470989	0.050232	3.41775		2.28314	0.657739	0.482357
8963	TAG54:7-FA18:3		TAG Ester	53398	DMS-MS	100009546							1.76623	2.30952	0.8023	1.0535	0.2778	3.824	0.0649	18.3165	1.4762	6.3929	3.9417	1.1067	0.1114	8.1601	0.817769	1.07381	0.283156	3.89773	0.0661514	18.6697	0.639181	2.76807	1.70672	0.479191	0.0482352	3.53325		2.704	0.674161	0.485875
8967	TAG54:7-FA20:4		TAG Ester	53574	DMS-MS	100009722							1.42575	1.64218	1.7803	1.7371	0.3571	6.0734	0.2193	30.9396	2.6441	2.6651	2.685	0.5935	0.1176	2.8805	1.93266	1.88576	0.387661	6.59316	0.238068	33.5874	1.61011	1.6229	1.63502	0.361409	0.071612	1.75407		6.32515	0.339868	0.331515
8968	TAG54:7-FA20:5		TAG Ester	53399	DMS-MS	100009547							2.53367	2.87882	0.9575	0.7958	0.1642	3.88	0.0984	8.9023	3.1805	5.989	17.339	1.2391	0.0697	10.9564	1.27012	1.05562	0.21781	5.1468	0.130527	11.8089	1.10479	2.08037	6.02296	0.43042	0.0242113	3.80587		1.45744	0.275713	0.294662
8970	TAG54:7-FA22:5		TAG Ester	54443	DMS-MS	100010591							2.28903	0.965067	1.1138	1.5857	0.321	4.3761	0.227	7.6175	2.4369	3.3108	5.7324	1.0156	0.2054	6.6354	1.48368	2.1123	0.427601	5.82936	0.302384	10.1472	2.52511	3.43064	5.9399	1.05236	0.212835	6.87559		1.01328	0.103795	0.190768
8971	TAG54:7-FA22:6		TAG Ester	54609	DMS-MS	100010757							1.72257	1.50597	1.8905	2.278	0.505	5.8031	0.3799	11.7064	2.0363	2.6351	3.0583	0.736	0.2814	3.8411	2.80268	3.37715	0.748666	8.60313	0.563204	17.3548	1.35215	1.74977	2.03079	0.488723	0.186857	2.55059		4.00169	0.497834	0.405083
8978	TAG54:8-FA18:2		TAG Ester	53400	DMS-MS	100009548							1.53557	2.37427	0.7366	1.0149	0.2419	3.1354	0.076	13.7587	1.9948	6.2593	6.8438	0.9472	0.128	7.3449	0.534517	0.736467	0.175536	2.27522	0.0551497	9.98406	0.840175	2.63631	2.88249	0.398944	0.0539114	3.09354		1.38924	0.796627	0.528808
8979	TAG54:8-FA18:3		TAG Ester	53740	DMS-MS	100009888							1.45627	2.9936	0.8306	0.8369	0.2465	4.0279	0.0694	36.2163	1.7761	11.7624	6.5393	1.5303	0.1512	10.7689	0.666372	0.671427	0.197762	3.2315	0.0556781	29.0556	0.593299	3.92918	2.18443	0.511191	0.0505077	3.59731		3.11785	0.491025	0.40083
8982	TAG54:8-FA20:4		TAG Ester	53741	DMS-MS	100009889							0.6026	2.61723	3.319	0.0619	0.6999	9.3981	0.5209	69.7537	0.0619	0.0619	5.4096	0.0619	0.1766	0.0619	3.08744	0.0575814	0.65107	8.74242	0.484558	64.8872	0.0236509	0.0236509	2.06692	0.0236509	0.0674758	0.0236509		34.9531	0.276573	0.294755
8983	TAG54:8-FA20:5		TAG Ester	54444	DMS-MS	100010592							3.23433	3.7742	1.2111	0.7205	0.1325	4.167	0.0587	9.9596	3.6583	7.8007	20.6847	1.3866	0.0605	15.4383	0.952897	0.566891	0.104251	3.27861	0.0461853	7.83624	0.969292	2.06685	5.48055	0.367389	0.0160299	4.09048		0.984179	0.229811	0.270234
8986	TAG54:8-FA22:6		TAG Ester	54076	DMS-MS	100010224							1.57907	1.9777	1.1678	1.5083	0.3228	3.8079	0.3366	10.7962	2.4175	2.7296	3.9834	0.6419	0.2832	5.6888	0.911928	1.17782	0.252073	2.97357	0.262849	8.43069	1.22238	1.38019	2.01416	0.324569	0.143197	2.87647		1.7597	0.630539	0.470884
9009	TAG55:1-FA16:0		TAG Ester	54267	DMS-MS	100010415							1.38323	1.42753	0.7566	0.8484	0.4847	2.068	0.2378	3.7575	2.1031	3.2483	7.975	1.0588	0.3066	6.1003	0.71309	0.79961	0.456826	1.94907	0.224125	3.54141	1.47324	2.27546	5.58656	0.741699	0.214776	4.27332		0.527574	0.169376	0.233234
9013	TAG55:1-FA18:1		TAG Ester	54610	DMS-MS	100010758							1.71195	1.62667	0.8385	0.8908	0.2472	2.6533	0.0523	1.9957	3.1878	3.7513	9.666	1.2641	0.0949	8.3348	0.434576	0.461682	0.128118	1.37515	0.0271059	1.03433	1.95971	2.30613	5.94221	0.777111	0.0583402	5.12385		0.214071	0.0880297	0.181453
9027	TAG55:2-FA18:1		TAG Ester	54268	DMS-MS	100010416							2.02277	1.86015	0.8483	0.9496	0.229	2.883	0.0378	1.0504	4.1967	4.0615	9.5192	1.3533	0.0608	7.997	0.440275	0.492851	0.118853	1.4963	0.0196185	0.545167	2.25611	2.18343	5.11744	0.727522	0.0326855	4.29912		0.212986	0.0607469	0.174063
9028	TAG55:2-FA18:2		TAG Ester	53742	DMS-MS	100009890							1.4119	1.68018	0.6014	0.8795	0.2882	2.7396	0.0538	4.1249	2.1705	4.0498	6.5149	1.1205	0.1084	6.6388	0.91301	1.33521	0.437528	4.1591	0.081676	6.26218	1.29182	2.41033	3.87749	0.666892	0.0645168	3.95124		1.07555	0.245314	0.278527
9040	TAG55:3-FA18:1		TAG Ester	54077	DMS-MS	100010225							2.28667	1.64262	0.9278	0.9477	0.2221	2.7195	0.0463	1.2965	3.6366	3.5483	6.2873	1.2048	0.0674	7.0036	0.463209	0.473144	0.110885	1.35772	0.0231155	0.647284	2.21391	2.16015	3.82761	0.733464	0.0410321	4.26368		0.232281	0.047824	0.17396
9041	TAG55:3-FA18:2		TAG Ester	53575	DMS-MS	100009723							1.58465	1.76137	0.6512	1.0043	0.2394	2.8277	0.0328	2.0166	2.5741	3.8598	6.3631	0.9957	0.0712	6.8594	0.481247	0.742194	0.176921	2.08972	0.0242397	1.4903	1.46142	2.19137	3.61259	0.5653	0.0404232	3.89436		0.425365	0.119302	0.20353
9053	TAG55:4-FA18:1		TAG Ester	54611	DMS-MS	100010759							2.3368	1.73582	1.6252	0.9283	0.2639	2.8905	0.0654	2.233	2.8079	3.677	5.2864	0.9845	0.0631	6.6686	1.35154	0.771986	0.219463	2.40378	0.0543874	1.85699	1.61762	2.11831	3.04548	0.567168	0.0363518	3.84177		0.593063	0.0808702	0.180436
9054	TAG55:4-FA18:2		TAG Ester	54078	DMS-MS	100010226							1.76998	1.78185	0.7573	0.9896	0.2943	2.9369	0.0413	2.8585	2.5352	3.8268	4.7003	1.0104	0.0733	6.2132	0.629074	0.822041	0.244469	2.43962	0.0343071	2.3745	1.42279	2.14766	2.63788	0.567051	0.041137	3.48694		0.635128	0.146242	0.22215
9068	TAG55:5-FA18:1		TAG Ester	53912	DMS-MS	100010060							2.53852	2.1259	2.487	0.9726	0.3136	3.2597	0.1138	5.0561	2.5131	4.7701	6.4373	1.0274	0.104	8.2524	2.71329	1.0611	0.342134	3.5563	0.124154	5.51615	1.18213	2.2438	3.02804	0.483278	0.0489205	3.88184		1.22498	0.181885	0.239537
9069	TAG55:5-FA18:2		TAG Ester	53913	DMS-MS	100010061							2.0827	1.75793	1.263	0.9635	0.2841	3.1	0.0505	5.1412	2.0638	4.3429	4.2489	0.83	0.0655	6.5881	2.46623	1.88141	0.554756	6.05331	0.0986103	10.0391	1.17399	2.47046	2.41699	0.472145	0.0372597	3.74764		2.04424	0.247245	0.279505
9075	TAG55:5-FA20:4		TAG Ester	53914	DMS-MS	100010062							1.74723	1.51772	1.295	1.5109	1	3.2739	0.3675	5.4731	1.1652	1.3603	2.1617	0.0796	0.216	1.8059	3.49858	4.08186	2.70161	8.84479	0.992841	14.7862	0.767732	0.896281	1.42431	0.0524472	0.142319	1.18988		7.80373	0.357797	0.338255
9084	TAG55:6-FA18:1		TAG Ester	53915	DMS-MS	100010063							1.32655	1.48548	1.0743	1.1394	0.6258	1.8768	0.4548	2.4321	1.1475	2.1236	2.6791	0.9356	0.5008	2.8915	0.688904	0.73065	0.4013	1.20351	0.291644	1.5596	0.772476	1.42957	1.80352	0.629829	0.337129	1.9465		0.704668	0.59234	0.451886
9089	TAG55:6-FA20:3		TAG Ester	54445	DMS-MS	100010593							1.17108	1.00322	0.9654	0.972	1.0136	1.4231	0.8347	1.2329	0.7504	1.1403	1.1844	1.1062	0.8715	1.5018	0.750175	0.755303	0.787629	1.10584	0.648613	0.958039	0.747994	1.13664	1.1806	1.10265	0.868706	1.49698		0.766133	0.219449	0.263958
9090	TAG55:6-FA20:4		TAG Ester	54269	DMS-MS	100010417							2.2074	1.45913	1.8677	1.4624	1.0281	4.6696	0.5075	8.4158	1.2602	1.0652	2.0093	0.4652	0.2542	2.243	1.77679	1.39122	0.978056	4.4423	0.482797	8.00615	0.863663	0.730022	1.37705	0.318819	0.174213	1.53721		3.41479	0.417456	0.365212
9095	TAG55:7-FA15:0		TAG Ester	54270	DMS-MS	100010418							2.52892	0.566233	1.6984	3.4335	1.329	5.1975	0.3813	0.1557	0.1557	0.1557	0.1557	0.1557	0.2689	0.1557	2.8313	5.72377	2.21549	8.66443	0.635641	0.259558	0.274975	0.274975	0.274975	0.274975	0.474893	0.274975		10.9907	0.175389	0.236455
9098	TAG55:7-FA18:1		TAG Ester	53916	DMS-MS	100010064							1.88578	1.03905	0.8305	1.4816	0.6472	2.5826	0.2025	0.7914	1.808	2.2522	4.1093	1.224	0.228	2.7059	1.30681	2.33133	1.01838	4.06378	0.318638	1.24529	1.74005	2.16756	3.95486	1.178	0.219431	2.60421		0.866836	0.0428818	0.17396
9102	TAG55:7-FA20:3		TAG Ester	53576	DMS-MS	100009724							1.06568	0.998667	1.2788	0.7956	1.2023	0.7956	0.9016	0.7956	0.7956	0.7956	0.7956	1.166	0.9255	0.7956	0.99087	0.616465	0.931594	0.616465	0.698599	0.616465	0.796662	0.796662	0.796662	1.16756	0.926736	0.796662		0.846527	0.83689	0.542222
9103	TAG55:7-FA20:4		TAG Ester	53917	DMS-MS	100010065							1.1418	0.97025	0.9686	1.0825	0.9982	1.5938	0.8252	2.0321	1.003	1.2369	0.9315	1.0782	0.8454	1.2363	0.958694	1.07143	0.987991	1.5775	0.81676	2.01132	1.03375	1.27483	0.960062	1.11126	0.871322	1.27421		1.13765	0.968963	0.584729
9107	TAG55:7-FA22:6		TAG Ester	54271	DMS-MS	100010419							2.37832	0.794683	1.4792	2.4655	1.331	3.6825	0.46	3.0975	0.8299	1.1581	0.0611	0.4719	0.3375	1.3103	1.30437	2.1741	1.17369	3.24726	0.405632	2.7314	1.04432	1.45731	0.076886	0.593821	0.424697	1.64883		2.10384	0.993406	0.589191
9113	TAG55:8-FA20:4		TAG Ester	53743	DMS-MS	100009891							1.30867	1.71263	1.2817	1.3653	1.385	2.2303	1.0271	2.7412	0.6816	0.6816	0.6816	1.5786	0.7416	1.9544	1.08265	1.15327	1.16991	1.88394	0.867593	2.3155	0.397984	0.397984	0.397984	0.921738	0.433017	1.14117		2.29625	0.0261083	0.169564
9143	TAG56:10-FA18:2		TAG Ester	54079	DMS-MS	100010227							1.70665	1.7228	0.6942	0.9196	0.236	3.0389	0.0307	2.3301	2.8119	4.1873	6.4798	1.0804	0.0683	7.3108	0.462317	0.612427	0.157169	2.02382	0.0204453	1.55178	1.63217	2.43052	3.7612	0.627119	0.0396448	4.24356		0.379133	0.100704	0.190681
9128	TAG56:1-FA16:0		TAG Ester	53401	DMS-MS	100009549							1.24813	1.57708	0.4326	0.7829	0.4025	1.2538	0.0908	0.998	1.8545	1.6803	4.8392	1.4946	0.2115	3.5563	0.564065	1.02082	0.524817	1.63482	0.118394	1.30129	1.1759	1.06545	3.06845	0.947699	0.134108	2.25499		0.597253	0.0882917	0.181453
9132	TAG56:1-FA18:1		TAG Ester	54080	DMS-MS	100010228							1.82667	1.29925	0.6415	1.1982	0.4213	2.2106	0.0591	0.7385	2.6482	2.2954	5.4615	1.3785	0.1673	4.356	0.561144	1.04811	0.368527	1.93369	0.051697	0.645994	2.03825	1.76671	4.20358	1.061	0.128767	3.3527		0.367235	0.0447477	0.17396
9167	TAG56:2-FA16:0		TAG Ester	53402	DMS-MS	100009550							1.32747	1.29378	0.5784	0.836	0.3921	1.6552	0.0461	1	1.6539	1.7263	3.2427	1.0387	0.1939	3.4717	0.609676	0.881206	0.413302	1.7447	0.0485928	1.05407	1.27834	1.3343	2.50637	0.802839	0.149871	2.68337		0.542719	0.0802356	0.180197
9169	TAG56:2-FA18:0		TAG Ester	54272	DMS-MS	100010420							1.87247	0.880017	0.8588	1.4209	0.5889	2.7941	0.0306	0.4784	1.6552	1.7079	3.3501	1.08	0.1926	2.8441	0.930831	1.54008	0.638293	3.02845	0.0331665	0.518525	1.88087	1.94076	3.80686	1.22725	0.218859	3.23187		0.543563	0.0369213	0.17396
9170	TAG56:2-FA18:1		TAG Ester	53577	DMS-MS	100009725							1.71862	1.24123	0.7677	1.1514	0.4309	2.5332	0.0658	0.5633	2.8564	2.1715	4.8837	1.3541	0.1467	4.1263	0.873395	1.30992	0.490225	2.88197	0.0748592	0.640854	2.30126	1.74947	3.93455	1.09093	0.118189	3.32435		0.500946	0.0428303	0.17396
9172	TAG56:2-FA20:0		TAG Ester	54273	DMS-MS	100010421							2.54043	1.07132	0.9916	1.0971	0.274	2.3639	0.0501	0.8127	3.2158	1.8054	4.8416	1.2388	0.0821	4.8129	1.489	1.64742	0.411442	3.54967	0.0752309	1.22036	3.00173	1.68522	4.5193	1.15633	0.0766347	4.49251		0.5621	0.0353094	0.17396
9173	TAG56:2-FA20:1		TAG Ester	53403	DMS-MS	100009551							1.82588	0.940617	0.869	1.4304	0.5308	2.8628	0.0722	0.5656	2.1341	1.8724	3.7719	1.2499	0.1576	3.4647	1.33238	2.19314	0.81384	4.38934	0.110699	0.867196	2.26883	1.99061	4.01003	1.32881	0.16755	3.68343		0.721719	0.0361469	0.17396
9179	TAG56:3-FA16:0		TAG Ester	54612	DMS-MS	100010760							1.4876	1.2726	0.6803	1.1094	0.6566	2.1282	0.1426	1.0572	1.5506	1.8354	3.1718	0.9277	0.2839	3.5767	0.751146	1.22493	0.724977	2.34983	0.15745	1.1673	1.21845	1.44224	2.49238	0.72898	0.223087	2.81055		0.715102	0.103574	0.190742
9181	TAG56:3-FA18:0		TAG Ester	54613	DMS-MS	100010761							2.33975	1.053	0.9601	2.3163	0.9222	4.3016	0.1371	0.8239	1.5137	2.0254	2.9083	1.0339	0.2728	3.4318	0.873679	2.1078	0.83919	3.9144	0.124759	0.749738	1.43751	1.92346	2.76192	0.981861	0.259069	3.25907		0.810474	0.0709167	0.175205
9182	TAG56:3-FA18:1		TAG Ester	54446	DMS-MS	100010594							1.78572	1.18322	0.9293	1.2295	0.4176	2.7622	0.0713	0.6005	3.0085	2.1815	4.1435	1.3009	0.1185	4.4016	0.99957	1.32247	0.449177	2.97107	0.0766914	0.645907	2.54265	1.8437	3.50189	1.09946	0.100151	3.72003		0.504758	0.0400165	0.17396
9183	TAG56:3-FA18:2		TAG Ester	53404	DMS-MS	100009552							1.48105	1.19205	0.5062	1.2059	0.4204	2.5805	0.0509	1.1858	1.8991	2.1974	3.229	1.0238	0.1387	3.8763	0.519615	1.23786	0.431541	2.64889	0.0522489	1.21722	1.59314	1.84338	2.70878	0.858857	0.116354	3.25179		0.588816	0.0840547	0.181453
9185	TAG56:3-FA20:0		TAG Ester	53405	DMS-MS	100009553							2.01345	1.07248	0.6665	1.0844	0.2675	2.3228	0.0397	1.5421	2.2477	2.037	3.7135	1.0324	0.0827	4.915	0.605322	0.984863	0.242946	2.10959	0.0360559	1.40055	2.09579	1.89933	3.46252	0.962626	0.0771108	4.58282		0.411257	0.0523772	0.17396
9186	TAG56:3-FA20:1		TAG Ester	53578	DMS-MS	100009726							1.74083	1.14787	0.8577	1.2715	0.4115	2.8041	0.0618	0.5916	2.905	2.2491	4.1669	1.3491	0.1149	4.4876	0.732826	1.08638	0.351589	2.39585	0.0528025	0.505468	2.53078	1.95937	3.63013	1.17531	0.100099	3.90951		0.385181	0.0391113	0.17396
9187	TAG56:3-FA20:2		TAG Ester	53579	DMS-MS	100009727							2.31967	0.817583	1.082	2.4037	0.8812	4.3217	0.1074	0.4797	1.4355	1.6276	2.8631	0.918	0.2441	2.8541	0.775627	1.72308	0.631685	3.09799	0.0769892	0.343871	1.75578	1.99075	3.50191	1.12282	0.298563	3.4909		0.546781	0.0520997	0.17396
9193	TAG56:4-FA16:0		TAG Ester	54614	DMS-MS	100010762							1.53587	1.50097	1.1453	1.3684	1.0581	2.3861	0.6031	1.51	0.9224	1.367	1.5657	0.736	0.7128	1.9254	0.754256	0.901182	0.696829	1.57141	0.397181	0.994435	0.614537	0.910746	1.04313	0.490351	0.474894	1.28277		1.10357	0.732644	0.503823
9196	TAG56:4-FA18:0		TAG Ester	53406	DMS-MS	100009554							2.15277	1.15015	1.1021	2.1642	1.0414	3.6612	0.4303	1.137	0.9006	1.3163	1.8106	0.6181	0.4059	1.9173	0.471077	0.925056	0.445132	1.56493	0.183926	0.485994	0.783028	1.14446	1.57423	0.537408	0.35291	1.667		0.672733	0.404673	0.36037
9197	TAG56:4-FA18:1		TAG Ester	53744	DMS-MS	100009892							1.86115	1.1365	0.9251	1.5919	0.5205	3.6426	0.0784	0.8841	2.082	2.2745	3.0894	1.0426	0.1149	4.1799	0.45705	0.786486	0.257156	1.79964	0.0387339	0.436794	1.83194	2.00132	2.71835	0.917378	0.1011	3.67787		0.335693	0.0788857	0.178685
9198	TAG56:4-FA18:2		TAG Ester	53745	DMS-MS	100009893							1.54065	1.17852	0.6877	1.211	0.4008	2.8912	0.0559	1.1741	1.9392	2.3144	2.8651	0.9816	0.1061	4.2882	0.825884	1.45433	0.481335	3.47215	0.0671324	1.41002	1.64546	1.96382	2.43111	0.832911	0.0900284	3.63864		0.727304	0.0993773	0.190215
9201	TAG56:4-FA20:1		TAG Ester	54274	DMS-MS	100010422							1.54667	1.17515	0.5705	1.1779	0.3572	2.8736	0.0463	1.0709	2.0332	2.3165	2.9448	1.0344	0.0949	4.6313	0.409019	0.844494	0.256094	2.06022	0.0331947	0.76778	1.73016	1.97124	2.50589	0.880228	0.0807556	3.94103		0.393436	0.0878904	0.181453
9202	TAG56:4-FA20:2		TAG Ester	53580	DMS-MS	100009728							2.09315	0.9444	1.0443	2.0544	0.6555	4.2382	0.0972	0.6242	1.9433	1.9532	2.792	0.8638	0.1171	3.5179	1.18073	2.3228	0.741139	4.7919	0.109899	0.705749	2.05771	2.06819	2.95637	0.914655	0.123994	3.72501		0.831697	0.0704064	0.175205
9203	TAG56:4-FA20:3		TAG Ester	53746	DMS-MS	100009894							1.61747	1.00982	1.0003	1.5207	0.6544	2.8766	0.1775	1.0315	1.4006	1.7312	2.3927	0.8129	0.2304	2.5465	0.815462	1.2397	0.533478	2.34505	0.144701	0.840897	1.38698	1.71437	2.36944	0.804998	0.22816	2.52174		0.655827	0.116124	0.201221
9204	TAG56:4-FA20:4		TAG Ester	54615	DMS-MS	100010763							2.29215	2.57573	1.9543	2.609	1.3981	3.5609	1.5073	2.9152	0.6165	0.8405	1.0873	0.429	0.4321	0.9114	1.85664	2.47862	1.32823	3.38296	1.43198	2.76952	0.239349	0.326315	0.422132	0.166555	0.167758	0.353841		7.90475	0.00378394	0.0827772
9206	TAG56:4-FA22:4		TAG Ester	53918	DMS-MS	100010066							1.68028	1.60483	1.2555	1.7313	1.4849	2.2421	1.0802	1.5136	0.108	0.108	0.108	0.4998	1.4267	0.108	1.74755	2.40983	2.06686	3.12082	1.50355	2.10681	0.0672967	0.0672967	0.0672967	0.311434	0.889002	0.0672967		8.81547	0.00274181	0.0772128
9210	TAG56:5-FA16:0		TAG Ester	54616	DMS-MS	100010764							1.60878	1.24347	1.3824	2.3167	1.1498	4.1919	0.5876	2.1444	0.6737	1.2157	1.6524	0.5784	0.7606	1.2676	1.95623	3.27835	1.62708	5.93193	0.831509	3.03453	0.541792	0.97767	1.32887	0.465151	0.611677	1.01941		3.36928	0.296348	0.305574
9213	TAG56:5-FA18:0		TAG Ester	53919	DMS-MS	100010067							1.96517	1.24607	1.3714	2.4824	0.9611	4.3227	0.5613	2.6263	0.7832	1.3868	1.3601	0.4862	0.3399	1.808	1.60733	2.90946	1.12644	5.06636	0.657863	3.07812	0.628538	1.11294	1.09151	0.390188	0.272778	1.45097		2.92011	0.537556	0.426324
9214	TAG56:5-FA18:1		TAG Ester	53920	DMS-MS	100010068							1.91995	1.03732	1.1226	1.9238	0.6207	4.2775	0.1404	1.498	1.5308	2.1392	2.4287	0.7466	0.1544	3.2973	0.914145	1.56657	0.505442	3.48321	0.114329	1.21984	1.47573	2.06224	2.34133	0.719742	0.148846	3.17868		0.786126	0.1682	0.233234
9215	TAG56:5-FA18:2		TAG Ester	54275	DMS-MS	100010423							1.92387	1.17483	0.7791	1.6907	0.5473	4.0903	0.0719	2.0516	1.4195	2.5724	2.3854	0.859	0.1233	4.4273	0.633629	1.37502	0.44511	3.32657	0.0584751	1.66853	1.20826	2.18959	2.03042	0.731168	0.104951	3.76845		0.748278	0.190712	0.245262
9218	TAG56:5-FA20:1		TAG Ester	54447	DMS-MS	100010595							1.4981	1.26722	0.5161	1.2499	0.3843	3.2221	0.0428	2.37	1.5012	2.7455	2.5564	0.9002	0.1022	4.9983	0.377455	0.914126	0.281061	2.35651	0.0313022	1.73332	1.18464	2.16656	2.01733	0.710376	0.0806492	3.94431		0.563524	0.243386	0.278156
9219	TAG56:5-FA20:2		TAG Ester	53407	DMS-MS	100009555							2.10603	0.97535	0.928	2.165	0.6004	4.7463	0.0864	1.2304	1.3557	2.0836	2.2264	0.7325	0.1031	3.4563	0.812669	1.89594	0.525783	4.15643	0.0756623	1.07749	1.38996	2.13626	2.28267	0.751012	0.105706	3.54365		0.836884	0.154667	0.22428
9220	TAG56:5-FA20:3		TAG Ester	54448	DMS-MS	100010596							1.72205	1.17482	1.2238	1.6957	0.516	3.7214	0.1313	1.4972	2.238	2.2626	3.0256	0.9901	0.1429	3.9889	1.20615	1.67124	0.508558	3.66773	0.129406	1.47561	1.90498	1.92592	2.57538	0.84277	0.121636	3.39534		0.804261	0.131479	0.212239
9221	TAG56:5-FA20:4		TAG Ester	54449	DMS-MS	100010597							1.87918	1.20653	1.4912	2.5582	0.8422	4.0884	0.4912	3.5776	1.05	1.0007	1.1302	0.4214	0.2253	1.2262	1.08892	1.86807	0.614999	2.98547	0.358689	2.61247	0.870262	0.829401	0.936733	0.349265	0.186733	1.0163		2.27484	0.231059	0.270234
9224	TAG56:5-FA22:4		TAG Ester	54276	DMS-MS	100010424							1.85922	1.26763	1.4358	2.4804	1.3344	4.1548	0.6306	2.5104	0.9313	1.1769	1.3396	0.544	0.9241	1.2342	0.68315	1.18017	0.634905	1.97684	0.300038	1.19444	0.734676	0.928423	1.05677	0.429146	0.728996	0.973625		1.23042	0.313929	0.317019
9225	TAG56:5-FA22:5		TAG Ester	53581	DMS-MS	100009729							1.9416	1.21728	1.4197	2.1069	1.002	3.4637	0.698	2.4259	0.0996	1.0238	1.4488	0.5038	0.5879	0.0996	0.966473	1.43429	0.68212	2.35794	0.475169	1.65145	0.0818215	0.841053	1.19019	0.413872	0.482961	0.0818215		2.44765	0.147949	0.22217
9229	TAG56:6-FA16:0		TAG Ester	54617	DMS-MS	100010765							1.62938	1.06058	1.3388	2.4574	0.9993	4.5024	0.5416	3.69	0.5673	1.0783	1.2514	0.3659	0.5821	1.2061	1.66728	3.06034	1.24448	5.60709	0.674485	4.59536	0.534894	1.0167	1.17992	0.344999	0.548849	1.1372		3.53781	0.209359	0.258415
9232	TAG56:6-FA18:0		TAG Ester	53921	DMS-MS	100010069							2.13982	1.4566	1.7636	2.2482	1.1077	3.9118	0.9005	6.7329	0.7441	1.2585	1.091	0.4277	0.4416	1.1434	1.57509	2.00789	0.989298	3.49367	0.804245	6.01322	0.510847	0.863998	0.749005	0.293629	0.303172	0.784979		4.24557	0.155625	0.225314
9233	TAG56:6-FA18:1		TAG Ester	54277	DMS-MS	100010425							1.8661	1.10768	1.5038	2.2238	0.5633	5.1103	0.1825	4.5824	1.6653	2.028	2.1044	0.6502	0.1524	2.6019	1.70216	2.51713	0.637602	5.78437	0.206573	5.18684	1.50341	1.83085	1.89982	0.586991	0.137584	2.34896		1.93012	0.838149	0.542222
9234	TAG56:6-FA18:2		TAG Ester	54081	DMS-MS	100010229							2.04017	1.0982	1.0922	2.011	0.7091	5.0906	0.1796	3.7227	1.0769	2.2863	1.8511	0.6416	0.1894	3.234	1.29653	2.38723	0.841762	6.04297	0.2132	4.41916	0.980605	2.08186	1.68558	0.584229	0.172464	2.94482		1.79901	0.537726	0.426324
9235	TAG56:6-FA18:3		TAG Ester	53747	DMS-MS	100009895							1.45713	1.37323	0.737	1.4235	0.4418	3.8755	0.0798	2.8973	1.2263	3.0919	2.3531	0.9005	0.1298	4.3224	0.906891	1.75164	0.543642	4.76887	0.0981952	3.56518	0.893002	2.25155	1.71355	0.655752	0.0945214	3.14761		1.32874	0.558492	0.437668
9238	TAG56:6-FA20:2		TAG Ester	54082	DMS-MS	100010230							2.23938	1.15787	0.8909	1.9931	0.6378	5.2584	0.106	2.943	1.0784	2.2968	1.942	0.6134	0.13	3.9512	1.97356	4.41521	1.41289	11.6487	0.234816	6.51948	0.931368	1.98365	1.67722	0.529767	0.112275	3.41248		3.03057	0.372507	0.344728
9239	TAG56:6-FA20:3		TAG Ester	53408	DMS-MS	100009556							2.09253	1.37568	1.4901	1.8427	0.5551	4.799	0.1436	4.0542	1.9228	2.9887	2.9584	0.9166	0.148	4.6873	2.29652	2.83995	0.855514	7.39616	0.221315	6.24829	1.39771	2.17252	2.15049	0.666287	0.107583	3.40725		2.00546	0.330238	0.32662
9240	TAG56:6-FA20:4		TAG Ester	54618	DMS-MS	100010766							1.52497	0.91985	1.615	1.8411	0.5577	4.3161	0.2766	5.3919	1.5019	1.2158	1.5384	0.4376	0.1365	1.3922	3.42367	3.90298	1.18228	9.14977	0.586369	11.4304	1.63277	1.32174	1.67245	0.47573	0.148394	1.51351		4.38689	0.533021	0.425677
9241	TAG56:6-FA20:5		TAG Ester	54278	DMS-MS	100010426							2.26423	1.34837	1.2438	1.0427	0.3344	3.6981	0.2316	3.0583	1.0179	2.7539	6.5242	0.6448	0.1286	4.2854	1.11368	0.933622	0.299418	3.31124	0.207372	2.73837	0.754913	2.0424	4.83859	0.478208	0.0953747	3.17822		0.755526	0.182925	0.239591
9243	TAG56:6-FA22:4		TAG Ester	53922	DMS-MS	100010070							2.26887	1.0013	1.3814	2.0098	1.1474	4.3278	0.5174	3.5394	1.0283	1.4578	1.506	0.4405	0.655	1.6902	1.31087	1.90719	1.08882	4.10685	0.490985	3.3587	1.02696	1.45591	1.50404	0.439928	0.65415	1.68801		1.8117	0.607482	0.458124
9244	TAG56:6-FA22:5		TAG Ester	54083	DMS-MS	100010231							1.9887	1.07162	1.4025	2.5535	0.7594	4.9526	0.3655	3.0469	1.0159	1.6215	1.5713	0.5847	0.3661	2.3609	1.39714	2.54375	0.7565	4.93369	0.364104	3.03526	0.948007	1.51313	1.46629	0.545624	0.341633	2.20312		1.85677	0.873681	0.556737
9245	TAG56:6-FA22:6		TAG Ester	53582	DMS-MS	100009730							2.74373	1.70298	2.2003	2.5309	1.3134	4.1182	1.1215	4.7023	0.7888	1.1991	0.8512	0.4279	0.8917	1.3644	1.47325	1.69461	0.879411	2.75742	0.750921	3.14851	0.463187	0.704117	0.499829	0.251265	0.523611	0.801182		3.30049	0.110051	0.197022
9249	TAG56:7-FA16:0		TAG Ester	53748	DMS-MS	100009896							1.63422	0.99875	1.1861	2.0898	0.7405	4.3607	0.3922	5.0562	0.9944	1.5094	1.8085	0.4583	0.4216	2.1263	1.15828	2.04079	0.723133	4.25843	0.383002	4.93761	0.995645	1.51129	1.81076	0.458874	0.422128	2.12896		1.8425	0.748554	0.510278
9250	TAG56:7-FA16:1		TAG Ester	53583	DMS-MS	100009731							1.29347	1.29898	1.2706	2.0339	0.51	4.2047	0.4076	5.2922	1.5761	1.5334	0.0335	0.5522	0.3104	2.0739	1.34077	2.14622	0.538164	4.4369	0.430109	5.58445	1.21333	1.18046	0.0257894	0.425102	0.238956	1.59656		3.09316	0.197543	0.250767
9251	TAG56:7-FA18:0		TAG Ester	53749	DMS-MS	100009897							2.08038	1.38348	0.8625	1.2457	0.365	3.5901	0.197	2.5452	1.7799	3.4394	8.5028	1.0156	0.205	5.0408	0.821924	1.1871	0.347829	3.42121	0.187732	2.42546	1.28654	2.48604	6.14594	0.734089	0.148177	3.64356		0.580937	0.122887	0.206692
9252	TAG56:7-FA18:1		TAG Ester	53584	DMS-MS	100009732							1.7429	1.05928	1.5153	1.992	0.6238	4.837	0.2637	9.0529	1.3137	1.7073	1.9215	0.4734	0.2131	2.3022	1.15874	1.52327	0.477015	3.69881	0.201649	6.92268	1.24018	1.61175	1.81396	0.446906	0.201174	2.17336		1.86744	0.574825	0.443898
9253	TAG56:7-FA18:2		TAG Ester	53409	DMS-MS	100009557							1.93702	1.09982	1.3946	1.966	0.622	5.4939	0.2221	10.4715	1.0776	2.2649	1.672	0.4637	0.1897	2.7345	1.6373	2.30814	0.730247	6.45001	0.260752	12.2939	0.9798	2.05934	1.52025	0.421616	0.172483	2.48632		3.09959	0.628604	0.46982
9254	TAG56:7-FA18:3		TAG Ester	53585	DMS-MS	100009733							1.53392	1.14928	1.0367	1.3939	0.4262	3.9619	0.1678	5.8456	1.1803	2.6958	2.0223	0.6977	0.136	3.5283	1.7095	2.29852	0.702798	6.53312	0.2767	9.63931	1.02699	2.34564	1.75962	0.607074	0.118335	3.07		2.37016	0.903835	0.569256
9258	TAG56:7-FA20:3		TAG Ester	53410	DMS-MS	100009558							1.9305	1.33048	1.2613	1.5964	0.5046	4.3746	0.1862	7.9302	1.0225	3.1168	2.3078	0.7508	0.1454	4.2904	1.96945	2.49269	0.787904	6.83069	0.290741	12.3826	0.768518	2.34261	1.73456	0.564306	0.109284	3.22469		2.83098	0.913714	0.571513
9259	TAG56:7-FA20:4		TAG Ester	53750	DMS-MS	100009898							1.86782	1.01753	1.8715	1.9829	0.5447	5.3081	0.2652	13.5102	1.3827	1.7331	1.3607	0.4332	0.1334	1.7163	3.09322	3.27734	0.900281	8.77324	0.438323	22.3297	1.35887	1.70324	1.33725	0.425735	0.131101	1.68673		5.84262	0.418855	0.365612
9260	TAG56:7-FA20:5		TAG Ester	54279	DMS-MS	100010427							2.53708	1.86465	1.246	1.0814	0.2504	3.7978	0.1199	5.2091	1.9604	4.2458	10.6005	1.0043	0.0755	7.7888	1.28348	1.11393	0.257932	3.91203	0.123506	5.36578	1.05135	2.277	5.68498	0.5386	0.0404902	4.17708		0.875606	0.163331	0.230582
9262	TAG56:7-FA22:4		TAG Ester	54084	DMS-MS	100010232							2.7603	0.73635	1.4946	1.8927	0.7109	4.9652	0.4251	5.6546	1.8206	1.4634	0.0432	0.6892	0.4005	3.7932	1.4946	1.8927	0.7109	4.9652	0.4251	5.6546	2.47247	1.98737	0.0586678	0.935968	0.543899	5.15135		1.35816	0.289932	0.302687
9263	TAG56:7-FA22:5		TAG Ester	54450	DMS-MS	100010598							2.25903	0.958567	1.5177	1.8025	0.5529	4.3525	0.31	4.6865	1.2383	1.839	1.9185	0.4668	0.297	2.5464	1.5085	1.79157	0.549548	4.32611	0.30812	4.65809	1.29182	1.91849	2.00143	0.486977	0.309838	2.65647		1.51667	0.377042	0.34543
9264	TAG56:7-FA22:6		TAG Ester	54619	DMS-MS	100010767							2.36832	0.986417	1.9177	2.2156	0.7917	4.4586	0.3967	5.1022	1.0056	1.6848	1.7787	0.5137	0.4703	1.9821	2.0089	2.32097	0.829353	4.67065	0.415567	5.34486	1.01945	1.708	1.80319	0.520774	0.476776	2.00939		2.06834	0.637933	0.474619
9268	TAG56:8-FA16:0		TAG Ester	53923	DMS-MS	100010071							1.51022	1.39977	0.72	1.0248	0.4855	2.2323	0.2549	4.151	2.1433	3.0309	7.5038	0.9645	0.2986	6.1528	0.530791	0.755492	0.357915	1.64567	0.187915	3.06016	1.53118	2.16529	5.36075	0.689043	0.213321	4.39559		0.455441	0.172305	0.23401
9269	TAG56:8-FA16:1		TAG Ester	54085	DMS-MS	100010233							1.57633	1.37572	1.5323	1.9935	0.4152	4.8299	0.2177	7.1176	2.5361	2.3793	3.0977	0.5793	0.1971	5.3374	1.55034	2.01696	0.420087	4.88675	0.220262	7.20138	1.84348	1.7295	2.2517	0.42109	0.143271	3.87972		1.58693	0.992602	0.589191
9271	TAG56:8-FA18:1		TAG Ester	54280	DMS-MS	100010428							1.81612	1.62667	0.761	0.9285	0.2331	2.7648	0.0489	2.3158	3.2643	3.547	9.6591	1.1984	0.0851	7.0293	0.761	0.9285	0.2331	2.7648	0.0489	2.3158	2.00674	2.18053	5.93797	0.736721	0.0523156	4.32129		0.462871	0.0925109	0.183673
9272	TAG56:8-FA18:2		TAG Ester	53411	DMS-MS	100009559							1.50575	0.99065	1.2723	1.8126	0.5871	4.9957	0.3235	18.6574	0.9135	2.2087	1.5101	0.4652	0.2651	1.6769	1.7023	2.42521	0.785523	6.6841	0.432834	24.9631	0.922122	2.22955	1.52435	0.469591	0.267602	1.69273		5.20593	0.377195	0.34543
9273	TAG56:8-FA18:3		TAG Ester	53924	DMS-MS	100010072							1.43377	1.2778	0.9581	1.3202	0.3225	4.5732	0.1714	16.0112	1.7305	2.552	1.7064	0.718	0.1139	2.9146	1.07444	1.48052	0.361662	5.12853	0.192214	17.9555	1.35428	1.99718	1.33542	0.561903	0.0891376	2.28095		3.43789	0.452209	0.382013
9277	TAG56:8-FA20:4		TAG Ester	54451	DMS-MS	100010599							1.88377	1.35912	1.7777	1.6863	0.6899	5.2743	0.5345	28.4876	0.999	2.1655	1.2929	0.36	0.1885	1.578	1.95176	1.85142	0.757452	5.79074	0.586836	31.277	0.735036	1.59331	0.95128	0.264878	0.138693	1.16105		8.7145	0.325304	0.323827
9278	TAG56:8-FA20:5		TAG Ester	53751	DMS-MS	100009899							3.9028	2.0237	1.2061	1.0488	0.2231	4.7202	0.1036	7.6766	2.1457	5.6835	10.4663	1.2249	0.0639	10.6156	2.33922	2.03413	0.4327	9.15477	0.200931	14.8887	1.06029	2.80847	5.17186	0.605277	0.0315758	5.24564		1.94667	0.111037	0.197127
9280	TAG56:8-FA22:5		TAG Ester	54620	DMS-MS	100010768							3.05362	1.25597	1.6354	1.794	0.3819	4.571	0.2826	7.8301	1.6538	2.1822	3.4242	0.8388	0.2391	5.5826	1.65649	1.81714	0.386826	4.62995	0.286245	7.93109	1.31675	1.73747	2.72635	0.667852	0.190371	4.44486		1.50742	0.236737	0.274023
9281	TAG56:8-FA22:6		TAG Ester	53412	DMS-MS	100009560							1.54407	0.8879	1.3123	1.4868	0.6025	3.4522	0.3688	6.6985	1.0628	1.5982	1.8357	0.3502	0.3805	2.3458	2.59639	2.94163	1.19205	6.83018	0.729671	13.253	1.19698	1.79998	2.06746	0.394414	0.428539	2.64196		3.2292	0.915019	0.571513
9289	TAG56:9-FA18:3		TAG Ester	54621	DMS-MS	100010769							1.30917	0.22115	1	1.8129	0.397	6.6994	0.3404	36.3356	0.0524	5.291	0.0524	0.0524	0.2292	0.0524	1.48861	2.6987	0.590979	9.97281	0.506724	54.0896	0.236943	23.9249	0.236943	0.236943	1.0364	0.236943		2.67657	0.790814	0.526523
9292	TAG56:9-FA20:4		TAG Ester	54622	DMS-MS	100010770							1.10698	1.99412	1.3766	1.3901	0.4069	5.2763	0.4353	46.9505	1.0682	3.4521	0.0398	0.7063	0.1706	4.122	1.02261	1.03264	0.302266	3.9195	0.323363	34.8772	0.535676	1.73114	0.0199587	0.354192	0.0855517	2.06708		8.65269	0.31657	0.318229
9293	TAG56:9-FA20:5		TAG Ester	53925	DMS-MS	100010073							3.99752	2.50985	1.8545	0.9323	0.2379	5.0828	0.1781	12.1222	2.5212	7.0754	10.7726	1.6445	0.0702	12.8473	1.38188	0.694701	0.177271	3.78743	0.132711	9.03282	1.00452	2.81905	4.29213	0.655218	0.0279698	5.11875		1.09263	0.170867	0.23378
9296	TAG56:9-FA22:6		TAG Ester	54452	DMS-MS	100010600							1.67258	1.20558	1.3304	1.4793	0.3457	3.3928	0.2848	11.7585	1.5312	2.7907	3.3146	0.5501	0.2466	4.8168	1.14757	1.27601	0.298193	2.92655	0.245662	10.1426	1.27009	2.31481	2.74937	0.456294	0.204548	3.99541		1.45913	0.986871	0.588959
9324	TAG57:2-FA18:1		TAG Ester	54086	DMS-MS	100010234							1.67557	1.44083	0.6559	0.9968	0.5071	2.3682	0.1101	2.0373	3.386	3.0986	8.5458	1.2649	0.3182	7.6648	1.57328	2.39098	1.21636	5.6805	0.264092	4.88678	2.35003	2.15056	5.93115	0.877895	0.220844	5.3197		0.950257	0.0741489	0.176735
9334	TAG57:3-FA18:2		TAG Ester	53586	DMS-MS	100009734							1.08933	1.40968	0.5042	1.0555	0.6408	1.7003	0.1141	3.5061	2.2669	2.9477	5.5251	0.9907	0.3873	5.715	0.514236	1.07651	0.653555	1.73414	0.116371	3.57589	1.60809	2.09104	3.91939	0.702782	0.274743	4.0541		0.606373	0.25967	0.285668
9403	TAG57:8-FA22:6		TAG Ester	54454	DMS-MS	100010602							3.69423	0.680833	1.746	1.7544	1.9456	3.4946	0.376	4.3318	0.7197	0.8818	0.1562	0.35	0.4355	4.2132	3.66909	3.68675	4.08854	7.34365	0.790137	9.10297	1.05709	1.29518	0.229425	0.514076	0.639657	6.1883		2.89016	0.313989	0.317019
9412	TAG57:9-FA22:6		TAG Ester	53413	DMS-MS	100009561							1.31867	0.873033	1.0925	1.0924	1.0391	1.3374	0.7975	1.3844	1.0318	1.1605	1.0656	1.0594	0.7931	1.5479	1.11307	1.11297	1.05867	1.36259	0.812518	1.41047	1.18186	1.32927	1.22057	1.21347	0.908442	1.77301		0.900829	0.0137969	0.133728
9430	TAG58:10-FA18:2		TAG Ester	54281	DMS-MS	100010429							1.246	1.24002	0.4403	1.0597	0.6497	1.9994	0.1289	3.3473	1.9478	3.0084	5.0736	1.0055	0.3966	5.7308	0.472476	1.13714	0.697178	2.14551	0.13832	3.59191	1.57079	2.4261	4.09156	0.810876	0.319834	4.62155		0.591193	0.154329	0.22428
9434	TAG58:10-FA20:4		TAG Ester	53414	DMS-MS	100009562							2.07982	3.00388	3.1829	1.8661	1.5744	2.8788	2.5144	32.4482	0.9193	0.1703	0.1703	0.1703	0.5224	0.1703	3.75586	2.20202	1.85781	3.39701	2.96702	38.2892	0.306037	0.0566933	0.0566933	0.0566933	0.173908	0.0566933		74.243	0.212328	0.260839
9435	TAG58:10-FA20:5		TAG Ester	54087	DMS-MS	100010235							1.1743	1.62223	3.2019	0.1959	0.1959	0.1959	1.0801	19.1669	0.1959	0.1959	0.1959	0.1959	0.4391	0.1959	3.54762	0.217052	0.217052	0.217052	1.19672	21.2364	0.120759	0.120759	0.120759	0.120759	0.270676	0.120759		30.4548	0.266804	0.290394
9437	TAG58:10-FA22:5		TAG Ester	53752	DMS-MS	100009900							1.3334	0.76845	2.2974	0.1404	0.8669	0.1404	0.7308	16.6552	0.1404	8.3698	0.1404	4.0432	0.5145	0.1404	2.54922	0.155789	0.961922	0.155789	0.810904	18.4808	0.182705	10.8918	0.182705	5.2615	0.66953	0.182705		1.33064	0.91562	0.571513
9438	TAG58:10-FA22:6		TAG Ester	53587	DMS-MS	100009735							2.05662	1.25437	1.652	2.0624	1.4898	3.0619	0.7953	10.4209	0.655	2.0909	1.569	0.4509	0.9145	2.409	1.91137	2.38621	1.72371	3.54264	0.920167	12.057	0.522176	1.6669	1.25083	0.359464	0.729053	1.92049		3.49534	0.530293	0.424235
9469	TAG58:2-FA18:1		TAG Ester	53753	DMS-MS	100009901							1.38983	1.69213	0.4678	1.1331	0.4417	1.7354	0.0575	0.7174	3.1659	1.9296	5.3911	1.4356	0.2512	3.7418	0.48774	1.1814	0.460528	1.80937	0.059951	0.74798	1.87095	1.14034	3.18598	0.848397	0.148452	2.21129		0.504707	0.0711244	0.175205
9480	TAG58:3-FA18:1		TAG Ester	54282	DMS-MS	100010430							1.40368	1.10547	0.5371	1.0702	0.4383	1.9671	0.0606	0.7668	2.3264	1.5509	3.3997	1.1786	0.2079	3.4392	0.427027	0.850873	0.348475	1.56396	0.0481806	0.609652	2.10445	1.40294	3.07535	1.06616	0.188065	3.11108		0.351494	0.04643	0.17396
9505	TAG58:5-FA18:1		TAG Ester	53588	DMS-MS	100009736							1.68592	1.00062	0.9626	2.0411	1.3305	3.0958	0.3501	0.8983	1.255	1.1213	1.56	0.5872	1.0204	1.6612	0.84649	1.7949	1.17001	2.72238	0.30787	0.789946	1.25423	1.12061	1.55904	0.586838	1.01977	1.66018		1.05985	0.26318	0.28781
9519	TAG58:6-FA16:0		TAG Ester	53589	DMS-MS	100009737							1.55743	0.859083	1.1603	2.2458	1.5899	2.6475	0.6996	1.737	0.1174	1.2755	0.1174	0.1174	1.0003	0.1174	1.25773	2.43438	1.72341	2.86982	0.758347	1.88286	0.136657	1.48472	0.136657	0.136657	1.16438	0.136657		3.4191	0.115727	0.201221
9521	TAG58:6-FA18:0		TAG Ester	54455	DMS-MS	100010603							1.8987	1.23772	1.4406	2.1185	2.087	2.1114	0.9585	1.3527	0.4878	0.1081	0.1081	0.3203	1.7102	0.1081	2.65793	3.90867	3.85055	3.89557	1.76845	2.49576	0.394113	0.0873382	0.0873382	0.258783	1.38174	0.0873382		8.08872	0.0651855	0.175205
9522	TAG58:6-FA18:1		TAG Ester	53754	DMS-MS	100009902							1.84123	0.8472	1.1837	2.7786	1.2534	4.2762	0.2759	1.2379	1.0637	0.8997	1.0476	0.4881	0.9513	1.3439	1.34902	3.16668	1.42846	4.87344	0.314434	1.41079	1.25555	1.06197	1.23654	0.576133	1.12288	1.58628		1.83392	0.691799	0.492278
9529	TAG58:6-FA20:4		TAG Ester	54283	DMS-MS	100010431							1.95797	1.43653	1.5011	1.7269	1.327	2.5306	0.5081	2.5297	0.9063	0.0946	0.0946	0.0946	0.5355	1.2475	1.25426	1.44293	1.10879	2.11447	0.424549	2.11372	0.630894	0.065853	0.065853	0.065853	0.372772	0.86841		4.08706	0.0364188	0.17396
9532	TAG58:6-FA22:4		TAG Ester	53415	DMS-MS	100009563							2.25917	0.85705	1.3912	2.8251	1.7787	3.9139	0.4541	1.3208	0.8521	0.9043	1.0099	0.4643	1.3546	1.1803	1.61389	3.27731	2.06342	4.5404	0.526788	1.53222	0.994224	1.05513	1.17834	0.541742	1.58054	1.37717		2.01483	0.356564	0.33811
9533	TAG58:6-FA22:5		TAG Ester	53590	DMS-MS	100009738							2.47375	1.02528	1.3053	2.2754	1.1545	2.8837	0.5033	1.3211	0.536	1.0729	1.2228	0.4231	1.0178	1.436	1.45157	2.53038	1.28387	3.20684	0.559699	1.46914	0.522782	1.04644	1.19265	0.412666	0.992701	1.40059		1.8861	0.197934	0.250767
9537	TAG58:7-FA16:0		TAG Ester	53591	DMS-MS	100009739							1.44933	1.18085	0.9453	1.428	1.0573	2.0273	0.5079	2.3797	0.1139	1.3509	1.4509	0.7508	0.75	2.1573	1.10637	1.67132	1.23745	2.37273	0.594441	2.78518	0.0964559	1.14401	1.22869	0.635813	0.635136	1.8269		1.75453	0.921637	0.573408
9539	TAG58:7-FA18:0		TAG Ester	53416	DMS-MS	100009564							2.09303	1.46005	1.3038	1.8897	1.4864	2.517	0.8772	2.024	0.8165	0.8871	1.4373	0.4095	1.2355	1.233	1.5228	2.20712	1.73608	2.93979	1.02455	2.36398	0.559227	0.607582	0.984418	0.28047	0.846204	0.844492		2.86104	0.464904	0.386782
9540	TAG58:7-FA18:1		TAG Ester	54284	DMS-MS	100010432							1.89028	0.870417	1.4028	2.5826	1.371	4.463	0.3437	2.401	0.7869	1.0082	1.0556	0.3463	0.8966	1.3284	1.15291	2.12254	1.12677	3.66797	0.282474	1.97329	0.90405	1.1583	1.21275	0.397855	1.03008	1.52617		1.65767	0.844352	0.544453
9541	TAG58:7-FA18:2		TAG Ester	53926	DMS-MS	100010074							1.83118	0.847517	1.2382	2.554	1.8071	4.3811	0.3972	2.7191	0.6435	1.0352	0.7657	0.4625	1.1958	1.0763	1.33852	2.76093	1.95352	4.73607	0.429382	2.93941	0.759277	1.22145	0.903463	0.545712	1.41095	1.26995		2.31686	0.621744	0.465449
9547	TAG58:7-FA20:4		TAG Ester	54456	DMS-MS	100010604							2.02745	1.95057	2.0068	1.7434	1.4901	2.9852	1.057	4.0818	0.5844	0.1262	0.1262	0.389	0.5496	1.2687	2.40403	2.08849	1.78505	3.57609	1.26622	4.88975	0.299605	0.0646991	0.0646991	0.199429	0.281764	0.650426		10.2585	0.0115607	0.123781
9550	TAG58:7-FA22:4		TAG Ester	54623	DMS-MS	100010771							3.00548	0.8363	1.2243	2.5779	1.563	4.8992	0.365	2.7602	0.7657	0.863	0.6351	0.3455	1.0971	1.8446	1.08793	2.29075	1.3889	4.35349	0.324344	2.45275	0.915581	1.03193	0.759416	0.413129	1.31185	2.20567		1.79255	0.297207	0.306117
9551	TAG58:7-FA22:5		TAG Ester	53417	DMS-MS	100009565							2.6898	0.9566	1.7277	2.2843	0.9433	4.4267	0.3703	2.1698	1.0426	1.3036	1.4788	0.561	0.648	2.4669	2.07461	2.74297	1.13271	5.31555	0.444653	2.60548	1.0899	1.36274	1.54589	0.586452	0.677399	2.57882		1.82573	0.153931	0.22428
9552	TAG58:7-FA22:6		TAG Ester	53418	DMS-MS	100009566							2.83253	1.10968	1.8974	1.968	1.4172	3.2242	0.6556	2.2344	0.504	0.9411	1.1069	0.4248	1.2997	1.5232	2.25344	2.33729	1.68314	3.82922	0.778622	2.65368	0.454184	0.84808	0.997492	0.382812	1.17124	1.37264		2.58979	0.346126	0.333033
9558	TAG58:8-FA18:1		TAG Ester	54457	DMS-MS	100010605							1.92545	0.987983	1.2899	1.7735	0.7803	3.987	0.2076	3.0549	1.4204	1.6024	2.6882	0.6377	0.5685	3.5649	1.67104	2.29753	1.01086	5.16507	0.268941	3.95755	1.43768	1.62189	2.7209	0.645456	0.575415	3.60826		1.35453	0.194649	0.248589
9559	TAG58:8-FA18:2		TAG Ester	53755	DMS-MS	100009903							1.68303	0.8243	1.0111	2.2219	1.7531	3.9857	0.4737	4.0241	0.6753	1.2471	0.6828	0.4138	1.0875	1.3072	2.07533	4.56055	3.59832	8.18083	0.972291	8.25965	0.819241	1.51292	0.828339	0.502002	1.3193	1.58583		4.20958	0.570998	0.442571
9564	TAG58:8-FA20:3		TAG Ester	54088	DMS-MS	100010236							2.8783	2.01285	3.0646	2.5589	1.6498	4.5838	0.9919	7.857	0.1657	0.1657	0.1657	0.1657	0.892	0.1657	4.61942	3.85715	2.48682	6.90938	1.49514	11.8432	0.0823211	0.0823211	0.0823211	0.0823211	0.443153	0.0823211		36.5146	0.0296974	0.170466
9565	TAG58:8-FA20:4		TAG Ester	54458	DMS-MS	100010606							2.17848	3.66868	3.5325	2.0899	1.9908	2.1399	2.6045	7.8298	0.4577	0.682	0.2015	0.515	0.6363	0.2015	3.62339	2.14367	2.04202	2.19496	2.67151	8.03125	0.124759	0.185898	0.0549243	0.140377	0.173441	0.0549243		28.1985	0.0201119	0.158203
9569	TAG58:8-FA22:5		TAG Ester	53756	DMS-MS	100009904							3.61232	0.971267	1.9487	2.2927	0.9489	4.8209	0.3289	4.5122	1.0433	1.6955	1.6756	0.5397	0.6216	3.3631	3.7979	4.46833	1.84935	9.39563	0.641006	8.794	1.07416	1.74566	1.72517	0.555666	0.639989	3.46259		3.14522	0.122977	0.206692
9570	TAG58:8-FA22:6		TAG Ester	53419	DMS-MS	100009567							2.9283	0.92	2.3219	1.8719	0.9949	3.7366	0.4031	2.8423	1.2115	1.3014	1.8804	0.4685	0.825	2.2816	2.782	2.24283	1.19204	4.47703	0.482976	3.40552	1.31685	1.41457	2.04391	0.509239	0.896739	2.48		1.68362	0.0588965	0.174063
9576	TAG58:9-FA18:1		TAG Ester	54089	DMS-MS	100010237							1.52837	1.33667	0.6538	1.0308	0.4536	2.0641	0.1086	1.9837	2.9438	2.9065	7.4069	1.1586	0.2945	6.5759	0.722884	1.13972	0.50153	2.2822	0.120075	2.19331	2.20234	2.17444	5.54132	0.866783	0.220324	4.91963		0.437035	0.0751506	0.176979
9577	TAG58:9-FA18:2		TAG Ester	54624	DMS-MS	100010772							1.30447	0.945567	0.841	1.6341	1.0278	3.4735	0.2555	5.0551	0.9157	1.847	1.8281	0.5863	0.6905	2.9608	0.841	1.6341	1.0278	3.4735	0.2555	5.0551	0.968414	1.95333	1.93334	0.620051	0.73025	3.13124		1.316	0.984728	0.588524
9582	TAG58:9-FA20:4		TAG Ester	53927	DMS-MS	100010075							2.02382	2.87243	2.5305	1.5169	1.3278	2.3903	1.6098	18.4378	0.9247	0.1353	0.1353	0.1353	0.4848	0.1353	2.92301	1.75219	1.53376	2.76107	1.8595	21.2977	0.321922	0.0471029	0.0471029	0.0471029	0.168777	0.0471029		47.3078	0.172302	0.23401
9585	TAG58:9-FA22:5		TAG Ester	53420	DMS-MS	100009568							1.9255	1.042	1.3702	1.4107	0.9054	3.5055	0.4375	6.1764	0.9498	2.0918	1.5511	0.6465	0.518	2.065	1.57458	1.62112	1.04045	4.02838	0.502758	7.09768	0.911516	2.00749	1.48858	0.620441	0.497121	1.98177		2.11338	0.918975	0.572481
9586	TAG58:9-FA22:6		TAG Ester	54459	DMS-MS	100010607							2.11537	0.8836	1.6219	1.7609	1.0345	3.5145	0.3258	5.1255	0.8946	1.5658	1.6183	0.4762	0.7605	2.3315	1.84153	1.99936	1.17459	3.99042	0.369919	5.81958	1.01245	1.77207	1.83148	0.538932	0.860684	2.63864		1.75583	0.425343	0.367752
9682	TAG60:10-FA22:5		TAG Ester	53757	DMS-MS	100009905							0.8679	1.33205	1.0713	2.7377	1.6101	2.021	0.9287	3.2689	0.1604	0.1604	0.1604	0.1604	1.3827	0.1604	0.815483	2.08396	1.22562	1.5384	0.706935	2.48832	0.120416	0.120416	0.120416	0.120416	1.03802	0.120416		5.40132	0.00499895	0.0920606
9683	TAG60:10-FA22:6		TAG Ester	53758	DMS-MS	100009906							1.57432	1.82498	2.1288	2.6708	2.8586	1.0249	1.8988	2.0223	0.1136	0.6855	0.1136	0.3744	2.0674	0.1136	1.98947	2.496	2.67151	0.957821	1.77452	1.88994	0.0622471	0.37562	0.0622471	0.205153	1.13283	0.0622471		6.19848	0.00170811	0.0727612
9696	TAG60:11-FA22:5		TAG Ester	54090	DMS-MS	100010238							0.836783	1.33027	1.3531	2.0926	1.2158	0.1312	1.1688	4.9513	0.1312	0.1312	0.1312	0.1312	1.1075	0.1312	0.664163	1.02714	0.59677	0.064399	0.5737	2.43032	0.0986268	0.0986268	0.0986268	0.0986268	0.83254	0.0986268		4.04059	0.0603841	0.174063
9697	TAG60:11-FA22:6		TAG Ester	53421	DMS-MS	100009569							1.03742	1.43002	1.6245	2.0373	1.8429	1.8809	1.2458	4.5163	0.0867	0.0867	0.0867	0.3451	1.4852	0.0867	2.89779	3.63414	3.28737	3.35516	2.22226	8.05619	0.0606287	0.0606287	0.0606287	0.241326	1.03859	0.0606287		15.4049	0.00838248	0.115203
9709	TAG60:12-FA22:6		TAG Ester	54285	DMS-MS	100010433							1.06312	1.3705	1.7761	2.1348	1.8692	0.0742	1.5817	5.4258	0.0742	0.0742	0.0742	0.4432	1.3562	0.0742	0.924683	1.11143	0.973153	0.0386304	0.823473	2.82481	0.0541408	0.0541408	0.0541408	0.323386	0.989566	0.0541408		4.37798	0.0478678	0.17396
4349	tartronate (hydroxymalonate)	Xenobiotics	Bacterial/Fungal	20693	LC/MS Neg	100000840	610	118.999	45	80-69-3	C02287	HMDB35227	1.90725	1.2342	2.1745	1.1795	1.5962	1.2381	0.5134	2.0663	0.2669	1.2408	0.1393	0.8211	0.559	0.9916	1.18748	0.644119	0.871677	0.67612	0.280365	1.1284	0.216253	1.00535	0.112867	0.665289	0.452925	0.803435		1.47051	0.275232	0.294662
3827	3-(3-hydroxyphenyl)propionate sulfate	Xenobiotics	Benzoate Metabolism	45415	LC/MS Neg	100005391	1294	245.013	187488	86321-32-6			0.267483	0.43865	0.2536	0.4265	0.7369	0.2536	0.2536	0.6636	0.2536	3.2384	5.6938	1.4728	1.6187	0.7949	0.261421	0.439653	0.759625	0.261421	0.261421	0.684065	0.578137	7.38265	12.9803	3.35757	3.69019	1.81215		0.089514	0.132073	0.212239
3832	3-phenylpropionate (hydrocinnamate)	Xenobiotics	Benzoate Metabolism	15749	LC/MS Neg	100000010	2860	149.061	107	501-52-0	C05629	HMDB00764	0.3717	0.575683	0.3717	0.3717	0.3717	0.3717	0.3717	0.5212	2.9522	3.0322	1.5728	3.6904	1.0848	1.4784	0.257973	0.257973	0.257973	0.257973	0.257973	0.361731	5.12817	5.26713	2.73206	6.41047	1.88437	2.56808		0.0688443	0.011073	0.119954
3795	4-vinylphenol sulfate	Xenobiotics	Benzoate Metabolism	36098	LC/MS Neg	100001755	3320	199.007	6426766	2628-17-3	C05627	HMDB62775	1.05473	1.29963	0.3674	0.3223	1.1519	0.2813	0.4227	0.9515	2.5629	1.3386	2.8778	0.1987	0.2543	0.3636	0.270631	0.23741	0.848503	0.207209	0.311366	0.700886	1.97202	1.02998	2.21432	0.152889	0.195671	0.279771		0.440746	0.335602	0.329448
3758	benzoate	Xenobiotics	Benzoate Metabolism	15778	LC/MS Neg	100000008	1750	121.029	243	65-85-0	C00180	HMDB01870	0.992483	1.30945	0.7858	0.7959	0.4675	0.7652	0.4675	1.0321	1.0247	0.7694	1.7564	0.6646	1.4334	1.1595	2.68298	2.71746	1.5962	2.61264	1.5962	3.52393	0.782542	0.587575	1.34133	0.507541	1.09466	0.885486		2.83305	0.386971	0.351057
3776	catechol sulfate	Xenobiotics	Benzoate Metabolism	35320	LC/MS Neg	100001605	1906	188.986	3083879	4918-96-1		HMDB59724	0.33545	1.29138	0.2504	0.9027	0.6673	0.2504	0.2504	2.9517	1.8463	5.8087	2.7076	1.8652	1.1284	1.9926	0.179976	0.648818	0.479623	0.179976	0.179976	2.12154	1.42971	4.49804	2.09667	1.44434	0.873792	1.543		0.318867	0.659091	0.482425
3744	hippurate	Xenobiotics	Benzoate Metabolism	15753	LC/MS Neg	100000014	2106.9	178.051	464	495-69-2	C01586	HMDB00714	0.530867	1.02522	0.3556	2.0843	1.4044	0.7766	0.3354	3.7512	1.7457	6.5586	4.1397	1.1439	1.9392	3.2176	0.483032	2.83122	1.90768	1.0549	0.455593	5.09547	1.70276	6.39728	4.03788	1.11576	1.8915	3.13846		0.646911	0.812501	0.535115
3816	p-cresol sulfate	Xenobiotics	Benzoate Metabolism	36103	LC/MS Neg	100001315	2890	187.007	4615423	3233-57-7		HMDB11635	2.26855	2.16848	0.2422	1.0393	1.1019	1.0108	0.2437	0.9626	0.8816	0.14	2.1725	0.247	0.3931	0.4783	0.115711	0.496524	0.526431	0.482909	0.116427	0.459881	0.406551	0.0645613	1.00185	0.113904	0.181279	0.220569		1.10518	0.968522	0.584729
4837	2-aminophenol sulfate	Xenobiotics	Chemical	43266	LC/MS Neg	100004322	1677	188.002	181670			HMDB61116	0.198817	0.760167	0.1601	1.0057	0.1601	0.1601	0.1601	2.5353	1.1829	4.6711	0.7495	2.1173	0.5018	1.2089	0.132929	0.835022	0.132929	0.132929	0.132929	2.10503	1.55611	6.14484	0.985968	2.78531	0.660118	1.59031		0.252996	0.588009	0.450146
4941	3-hydroxypyridine sulfate	Xenobiotics	Chemical	48448	LC/MS Neg	100006098	1595.5	173.987		1955-23-3			0.3908	0.964033	0.3908	0.3908	0.3908	0.3908	0.3908	1.7186	1	2.1833	0.3908	0.3908	0.9165	1.9117	14.5099	14.5099	14.5099	14.5099	14.5099	63.8094	1.03731	2.26476	0.40538	0.40538	0.950693	1.98302		19.3512	0.564071	0.4396
4819	O-sulfo-L-tyrosine	Xenobiotics	Chemical	45413	LC/MS Neg	100005384	990	260.023	514186				1.57698	1.15283	0.4278	0.7115	1.2484	1.2379	0.6934	1.521	0.4824	0.3877	0.4992	0.058	0.7169	1.109	0.18284	0.304092	0.533561	0.529074	0.296356	0.650069	0.418447	0.336302	0.43302	0.0503108	0.621859	0.961978		0.884503	0.395776	0.355759
4816	sulfate*	Xenobiotics	Chemical	46960	LC/MS Neg	100002528	616	96.9601	1118	14808-79-8	C00059	HMDB01448	1.23222	1.18237	0.7606	0.81	1.1321	0.6886	0.917	1.097	0.8227	0.536	1.31	0.1917	0.5694	0.6574	0.363396	0.386998	0.54089	0.328996	0.43812	0.52412	0.695808	0.453328	1.10795	0.162132	0.481576	0.556003		0.747085	0.309559	0.31453
4955	thioproline	Xenobiotics	Chemical	53231	LC/MS Pos Early	100009232	1250	134.027	93176	34592-47-4			0.890733	1.14617	0.4789	10.6367	2.8788	8.6988	1.0341	0.5974	0.7203	0.8152	1.2925	0.075	0.9676	1.0575	0.367123	8.15406	2.20688	6.66847	0.792738	0.457965	0.628443	0.71124	1.12767	0.0654355	0.844205	0.922641		4.33693	0.120623	0.204903
4927	trizma acetate	Xenobiotics	Chemical	20710	LC/MS Pos Early	100000856	1884	122.081	6503	6850-28-8	C07182		2.4225	1.68323	2.3311	1.2694	0.5567	0.6317	2.4702	22.0751	0.2332	1.4088	0.27	0.3644	1.3164	1.1776	6.27146	3.41512	1.49771	1.69949	6.64568	59.3896	0.138543	0.836961	0.160406	0.216488	0.782066	0.699606		27.8465	0.328824	0.32564
4767	S-carboxymethyl-L-cysteine	Xenobiotics	Drug - Other	47897	LC/MS Pos Early	100002324	1490	180.033	1080	638-23-3	C03727	HMDB29415	0.757283	1.1132	1.1939	0.3316	2.4834	0.3627	1.1994	1.26	0.3316	0.6981	0.37	0.3316	1.4371	1.1008	1.07852	0.299553	2.24339	0.327647	1.08349	1.13823	0.29788	0.627111	0.332375	0.29788	1.29096	0.988861		1.60905	0.102832	0.190742
4740	salicylate	Xenobiotics	Drug - Topical Agents	1515	LC/MS Polar	501	802	137.024	338	69-72-7	C00805	HMDB01895	0.5544	1.46722	0.3372	0.7681	0.3372	1.505	3.3523	1.0314	1.3504	1.3176	0.9686	0.3372	0.8432	0.8388	0.218384	0.497453	0.218384	0.974699	2.17109	0.667976	0.920382	0.898027	0.660162	0.229823	0.574694	0.571695		1.23171	0.120832	0.204903
3962	2-oxindole-3-acetate	Xenobiotics	Food Component/Plant	40479	LC/MS Neg	100003109	2076	190.051	3080590	2971-31-5		HMDB35514	0.4177	0.58855	0.4177	0.4629	0.4177	0.4177	0.4177	0.9916	0.4177	3.3571	2.0945	0.523	0.7838	4.6931	0.114202	0.12656	0.114202	0.114202	0.114202	0.27111	0.70971	5.70402	3.55875	0.888625	1.33175	7.974		0.0423705	0.143236	0.220012
3974	3-hydroxyindolin-2-one	Xenobiotics	Food Component/Plant	42561	LC/MS Pos Early	100003823	2035	132.044	6097	61-71-2	C11130		1.32363	2.33037	0.219	0.5792	0.8523	0.8661	0.219	0.4474	2.254	0.219	0.8491	0.219	0.4832	0.9132	0.146	0.386133	0.5682	0.5774	0.146	0.298267	0.96723	0.0939766	0.364363	0.0939766	0.207349	0.39187		1.00153	0.773571	0.52031
4065	ergothioneine	Xenobiotics	Food Component/Plant	37459	LC/MS Pos Early	100002154	850	230.096	3032311	58511-63-0	C05570	HMDB03045	1.13905	1.08232	0.1771	1.4057	1.2719	2.1946	0.2383	4.1337	0.4102	2.4796	0.6317	1.1599	0.99	1.4907	0.0842671	0.668855	0.605191	1.04423	0.113387	1.96688	0.379002	2.29101	0.583655	1.07168	0.914705	1.37732		0.67743	0.656397	0.482357
4067	erythritol	Xenobiotics	Food Component/Plant	20699	LC/MS Polar	100000846	1491	167.056	222285	149-32-6	C00503	HMDB02994	0.65885	0.641417	0.2471	0.2471	0.2471	0.8191	0.697	0.788	0.2471	0.2471	0.2471	0.2471	0.2471	0.2471	0.14427	0.14427	0.14427	0.478232	0.406944	0.460074	0.385241	0.385241	0.385241	0.385241	0.385241	0.385241		0.769241	0.0834839	0.181453
4072	ferulic acid 4-sulfate	Xenobiotics	Food Component/Plant	47114	LC/MS Neg	100005389	1200	273.007	6305574	86321-29-1		HMDB29200	0.2477	0.555433	0.2477	0.4984	0.2477	0.2477	0.2477	1.4078	0.9909	3.156	0.614	0.2477	0.3892	1.1846	0.1709	0.34387	0.1709	0.1709	0.1709	0.97131	1.78401	5.68205	1.10544	0.445958	0.700714	2.13275		0.16866	0.98163	0.588219
4053	galacturonate 1-phosphate	Xenobiotics	Food Component/Plant	38588	LC/MS Neg	100002678	580	273.002	440203	103192-54-7	C04037		1.04238	1.21432	2.4292	1.3042	1.6399	1.1424	8.0933	0.8171	0.941	1.1104	0.8823	0.1061	0.5104	0.969	1.04355	0.560263	0.704475	0.490757	3.47675	0.351013	0.774921	0.914424	0.726581	0.0873742	0.420319	0.79798		1.78063	0.149083	0.22285
3987	gluconate	Xenobiotics	Food Component/Plant	587	LC/MS Polar	338	2922	195.051	10690	527-07-1	C00257	HMDB00625	1.27768	1.76115	0.0912	1.3509	0.6495	0.8511	0.0912	0.6514	0.2514	0.6943	0.398	0.0912	0.6293	0.7937	0.0813656	1.20523	0.579462	0.759323	0.0813656	0.581157	0.142748	0.394231	0.225989	0.0517843	0.357323	0.450671		2.02613	0.247235	0.279505
4094	homostachydrine*	Xenobiotics	Food Component/Plant	33009	LC/MS Pos Early	100001550	1750	158.118	441447	1195-94-4	C08283	HMDB33433	0.381117	0.4688	0.5143	1.1205	0.91	1.0265	0.8365	1.2967	0.3823	2.899	0.361	0.8675	1.3168	1.7538	0.212658	0.463316	0.376277	0.424448	0.345885	0.536174	0.815486	6.18387	0.770051	1.85047	2.80887	3.74104		0.145874	0.829005	0.540103
4232	methyl glucopyranoside (alpha + beta)	Xenobiotics	Food Component/Plant	46144	LC/MS Neg	100005864	1070	193.072					1.58965	2.3279	0.9776	0.818	1.2265	0.717	2.9091	0.6149	0.5722	0.9776	0.8874	0.1038	0.2025	1.0249	0.492519	0.412111	0.617915	0.361227	1.46562	0.309789	0.245801	0.419949	0.381202	0.0445895	0.0869883	0.440268		2.26043	0.0779412	0.178685
4267	N-acetylpyrraline	Xenobiotics	Food Component/Plant	48438	LC/MS Neg	100006120	2545	295.13					0.0934	0.259117	0.0934	0.0934	0.0934	0.0934	0.0934	1	1.2948	2.1722	1.4426	0.3029	0.0934	0.7929	0.0608245	0.0608245	0.0608245	0.0608245	0.0608245	0.651225	4.99698	8.3831	5.56738	1.16897	0.360455	3.06001		0.0405894	0.535275	0.426324
4130	N-glycolylneuraminate	Xenobiotics	Food Component/Plant	37123	LC/MS Pos Early	100001491	636	326.108	123802	1113-83-3	C03410	HMDB00833	1.8075	1.36488	0.3803	0.6855	0.9626	1.2019	0.5941	0.625	0.549	0.6598	0.4805	0.2003	0.5026	1.0035	0.214861	0.387292	0.543847	0.679046	0.335653	0.353111	0.402232	0.483411	0.352045	0.146752	0.368237	0.735228		1.01041	0.966887	0.584729
4260	pyrraline	Xenobiotics	Food Component/Plant	48428	LC/MS Neg	100001767	2304	253.119	122228	74509-14-1		HMDB33143	0.238783	0.583867	0.8726	0.6528	0.3312	0.2246	1.8563	3.1312	3.716	4.5664	3.7377	0.6555	0.6414	1.3633	0.568871	0.425577	0.215918	0.146423	1.21017	2.04131	6.36447	7.82096	6.40163	1.12269	1.09854	2.33495		0.183281	0.751696	0.510821
4207	stachydrine	Xenobiotics	Food Component/Plant	34384	LC/MS Pos Early	100001296	1440	144.102	115244	4136-37-2	C10172	HMDB04827	0.43035	0.787217	0.7175	0.7802	1.4918	1.7774	1.3926	1.8624	1.0828	2.8524	1.9523	0.7767	2.0986	1.6433	0.460694	0.500952	0.957858	1.14124	0.894163	1.19581	1.37548	3.6234	2.48	0.986641	2.66585	2.08748		0.389649	0.165987	0.231857
4215	tartarate	Xenobiotics	Food Component/Plant	15336	LC/MS Neg	100000295	615.3	149.009	444305	87-69-4;6106-24-7	C00898	HMDB00956	1.9659	1.99983	0.8978	0.1764	0.9946	0.1962	0.6855	0.0594	0.4457	0.1555	0.5284	0.0594	0.0594	0.1483	0.474955	0.0933193	0.526165	0.103794	0.362644	0.0314239	0.222869	0.0777565	0.264222	0.0297025	0.0297025	0.0741562		2.2799	0.182358	0.239537

## Sheet: ONC lipid
PATHWAY SORTORDER	BIOCHEMICAL	SUPER PATHWAY	SUB PATHWAY	COMP ID	PLATFORM	CHEMICAL ID	RI	MASS	PUBCHEM	CAS	KEGG	Group HMDB	HFD Control	LFD Control	HFD ONC201	HFD ONC201	HFD ONC201	HFD ONC201	HFD ONC201	HFD ONC201	LFD ONC201	LFD ONC201	LFD ONC201	LFD ONC201	LFD ONC201	LFD ONC201	Scaled HFD	Scaled HFD	Scaled HFD	Scaled HFD	Scaled HFD	Scaled HFD	Scaled LFD	Scaled LFD	Scaled LFD	Scaled LFD	Scaled LFD	Scaled LFD		HFD + ONC201/ HFD +Veh LFD +ONC201/ LFD +Veh	Pvalue	Qvalue
28	alanine	Amino Acid	Alanine and Aspartate Metabolism	1126	LC/MS Pos Early	811	1700	90.055	5950	56-41-7	C00041	HMDB00161	1.01952	0.915317	1.0911	0.95	1.0999	1.0888	1.8748	0.7765	0.7722	0.8495	0.8711	0.2627	0.7263	0.7708	0.678629	0.59087	0.684103	0.677199	1.16607	0.482958	0.843642	0.928094	0.951692	0.287004	0.793496	0.842113		0.921176	0.0868487	0.181453
38	asparagine	Amino Acid	Alanine and Aspartate Metabolism	512	LC/MS Pos Early	917	1225	133.061	6267	70-47-3	C00152	HMDB00168	1.10095	1.03947	1.571	0.9685	1.1412	1.6133	3.0229	0.8908	0.8288	0.6867	0.4882	0.1456	0.5919	0.7376	1.04662	0.645229	0.760285	1.0748	2.0139	0.593464	0.797332	0.660627	0.469664	0.140072	0.569427	0.709595		1.83293	0.0344782	0.173484
34	aspartate	Amino Acid	Alanine and Aspartate Metabolism	443	LC/MS Pos Early	234	1165	134.045	5960	56-84-8	C00049	HMDB00191	1.0286	1.00455	1.6304	1.3337	1.5019	1.6152	1.9512	0.7837	0.9807	0.7105	0.9807	0.1245	0.8147	0.8206	0.95548	0.781602	0.880174	0.946573	1.14348	0.45928	0.976258	0.707282	0.976258	0.123936	0.81101	0.816883		1.17113	0.00681827	0.102833
30	N-acetylalanine	Amino Acid	Alanine and Aspartate Metabolism	1585	LC/MS Neg	1110	861.2	130.051	88064	97-69-8	C02847	HMDB00766	2.24148	1.58733	0.7879	0.8302	1.146	1.354	1.7025	0.7379	0.5839	0.5678	0.3095	0.0684	0.2534	0.9938	0.430131	0.453224	0.625626	0.739177	0.929431	0.402835	0.36785	0.357707	0.194981	0.0430911	0.159639	0.626081		2.04672	0.103025	0.190742
39	N-acetylasparagine	Amino Acid	Alanine and Aspartate Metabolism	33942	LC/MS Pos Early	100001257	785	175.071	99715	4033-40-3		HMDB06028	1.64092	1.14572	0.5903	0.9351	0.7159	1.1801	1.0428	0.9099	0.6257	0.5185	0.4658	0.2297	0.4752	0.7301	0.420467	0.666065	0.509931	0.840577	0.742779	0.648115	0.546121	0.452555	0.406558	0.200486	0.414762	0.637243		1.4403	0.2309	0.270234
35	N-acetylaspartate (NAA)	Amino Acid	Alanine and Aspartate Metabolism	22185	LC/MS Neg	100000787	620.5	174.041	65065	997-55-7;997-55-7	C01042	HMDB00812	5.56312	1.07637	2.0971	1.133	1.3999	1.0396	1.9025	0.4241	0.3158	1.416	1.3211	0.14	0.3368	1.048	1.41688	0.765497	0.945825	0.702393	1.2854	0.286538	0.293394	1.31554	1.22737	0.130067	0.312905	0.973646		1.27031	0.08002	0.180153
411	creatine	Amino Acid	Creatine Metabolism	27718	LC/MS Pos Early	1221	1947	132.077	586	57-00-1	C00300	HMDB00064	1.24175	0.961783	1.1568	1.1159	1.412	1.0985	1.6032	0.5945	0.7861	1.8862	1.3587	0.299	0.7834	0.9903	0.591048	0.570151	0.721439	0.561261	0.819129	0.30375	0.817336	1.96115	1.41269	0.310881	0.814529	1.02965		0.562031	0.653632	0.481107
413	creatine phosphate	Amino Acid	Creatine Metabolism	33951	LC/MS Polar	100000112	3831	210.029	587	922-32-7	C02305	HMDB01511	1.39953	1.83805	0.2672	4.7678	0.494	1.573	0.9691	1.2153	1.1682	0.2889	0.9001	0.2248	0.9116	1	0.150243	2.68087	0.27777	0.884478	0.544913	0.683348	0.635565	0.157177	0.489704	0.122304	0.49596	0.544055		2.13584	0.208568	0.258131
412	creatinine	Amino Acid	Creatine Metabolism	513	LC/MS Pos Early	275	2055	114.066	588	60-27-5	C00791	HMDB00562	1.23795	0.9938	1.0664	1.1009	1.6309	1.0703	1.839	0.6442	0.6061	2.03	1.1878	0.2593	0.6781	0.9186	0.643903	0.664734	0.984754	0.646258	1.11041	0.388974	0.609881	2.04266	1.19521	0.260918	0.68233	0.924331		0.776688	0.901284	0.568759
410	guanidinoacetate	Amino Acid	Creatine Metabolism	43802	LC/MS Pos Early	344	1937	118.061	763	352-97-6	C00581	HMDB00128	0.8075	1.07403	1.925	1.4178	0.9942	2.0421	4.4991	0.6368	0.8875	0.6052	0.5028	0.3956	0.7159	0.9269	1.47636	1.08737	0.762492	1.56617	3.45054	0.488387	0.826324	0.563483	0.468142	0.368331	0.666553	0.863009		2.35135	0.0528504	0.17396
47	4-hydroxyglutamate	Amino Acid	Glutamate Metabolism	40499	LC/MS Pos Early	100002544	1141	164.055	439902	2485-33-8	C03079	HMDB01344	1.5837	1.23285	1.5117	0.4739	0.2953	1.3157	2.6652	0.6808	0.2953	0.2953	1.0548	0.5917	1.2023	0.2953	1.60848	0.504238	0.314205	1.39993	2.83582	0.724384	0.239526	0.239526	0.855579	0.479945	0.97522	0.239526		2.43852	0.417314	0.365212
43	alpha-ketoglutaramate*	Amino Acid	Glutamate Metabolism	62101	LC/MS Polar	100002397	1916	144.03		18465-19-5			1.74098	0.927583	0.4187	0.7336	1.1765	0.7569	0.5676	0.513	0.464	0.5151	0.7156	0.0782	0.8098	0.516	0.307698	0.539114	0.864597	0.556237	0.417123	0.376998	0.500225	0.555314	0.771467	0.0843051	0.873021	0.556284		0.916528	0.252994	0.283059
53	beta-citrylglutamate	Amino Acid	Glutamate Metabolism	54923	LC/MS Neg	100003271	530	320.062	72715786	73590-26-8	C20775		1.74705	3.17022	0.588	1.1189	3.3759	7.5189	0.0905	0.8167	0.5104	2.576	0.6297	0.1483	0.3502	0.6241	0.394569	0.750822	2.26535	5.04545	0.0607287	0.548035	0.160998	0.812563	0.19863	0.0467791	0.110466	0.196864		5.93917	0.179469	0.238356
49	gamma-carboxyglutamate	Amino Acid	Glutamate Metabolism	38754	LC/MS Pos Early	100002679	903	192.05	40772	56271-99-9		HMDB41900	0.91755	1.20077	0.4976	1.388	1.2718	1.0776	0.8964	1.1417	0.5556	0.7733	0.5646	0.0733	0.4781	0.8424	0.341161	0.95163	0.871962	0.738816	0.614583	0.782764	0.462704	0.644005	0.4702	0.0610443	0.398162	0.701552		1.57101	0.00311968	0.0792031
41	glutamate	Amino Acid	Glutamate Metabolism	57	LC/MS Pos Early	561	1500	148.06	611	56-86-0	C00025	HMDB00148	0.874433	0.9446	1.2259	1.12	1.4972	1.2278	1.8473	0.8556	0.9344	0.9086	1.1609	0.143	0.7739	0.8581	0.935682	0.854853	1.14276	0.937133	1.40997	0.653047	0.989202	0.961889	1.22899	0.151387	0.819289	0.908427		1.17281	0.0151051	0.139209
50	glutamate, gamma-methyl ester	Amino Acid	Glutamate Metabolism	33487	LC/MS Pos Early	100001103	2170	162.076	68662	1499-55-4;1499-55-4		HMDB61715	0.885617	0.858733	1.1121	0.9252	1.6309	1.258	1.6529	0.4659	0.756	0.9992	0.8464	0.1544	0.6607	0.7401	0.622485	0.51787	0.912877	0.70415	0.925191	0.260782	0.880366	1.16357	0.985638	0.1798	0.769389	0.861851		0.814639	0.0675395	0.175205
42	glutamine	Amino Acid	Glutamate Metabolism	53	LC/MS Pos Early	563	1291	147.076	5961	56-85-9	C00064	HMDB00641	1.12598	1.05147	0.6572	1.0368	0.9827	1.3892	0.2895	0.6789	0.9002	1.1003	0.4472	0.287	0.3456	0.546	0.372323	0.587378	0.556728	0.787023	0.16401	0.384617	0.856137	1.04644	0.425311	0.272952	0.328684	0.519275		0.826977	0.383854	0.349262
52	N-acetyl-aspartyl-glutamate (NAAG)	Amino Acid	Glutamate Metabolism	35665	LC/MS Pos Early	100001612	1035	305.098	5255	3106-85-2	C12270	HMDB01067	10.3944	6.40288	0.7567	1.0149	1.0817	1.7561	1.0177	0.5763	0.3636	24.2326	0.6351	1.0492	0.2889	0.6657	0.314979	0.422455	0.450261	0.730982	0.423621	0.239887	0.0567869	3.78464	0.0991897	0.163864	0.0451203	0.103969		0.607063	0.367552	0.341764
44	N-acetylglutamate	Amino Acid	Glutamate Metabolism	15720	LC/MS Pos Early	100000282	1050	190.071	70914	5817-08-03	C00624	HMDB01138	1.72227	1.3598	0.9816	0.8929	0.621	1.0133	1.0946	0.7289	0.737	1.7495	0.6234	2.7935	0.7722	0.9328	0.530872	0.482901	0.335851	0.548016	0.591985	0.394206	0.541991	1.28659	0.45845	2.05435	0.567878	0.685983		0.515408	0.165379	0.23143
45	N-acetylglutamine	Amino Acid	Glutamate Metabolism	33943	LC/MS Polar	100001253	2140	187.072	182230	2490-97-3	C02716	HMDB06029	2.59262	0.897767	0.3071	0.758	0.7961	1.4789	0.3843	0.5135	0.4153	0.3941	0.8276	0.1866	0.6525	0.6651	0.207229	0.511494	0.537204	0.997953	0.259323	0.346507	0.462592	0.438978	0.921843	0.207849	0.726804	0.740838		0.817316	0.0366656	0.17396
51	pyroglutamine*	Amino Acid	Glutamate Metabolism	46225	LC/MS Pos Early	100001540	1900	129.066	134508	2353-44-8			0.571383	1.0018	1.1773	0.3308	0.3272	0.3272	1.9183	1.125	0.5469	1.9447	0.8279	0.5361	0.3272	0.3272	0.60779	0.170778	0.16892	0.16892	0.990337	0.58079	0.545917	1.94121	0.826412	0.535137	0.326612	0.326612		0.596978	0.186861	0.242191
59	S-1-pyrroline-5-carboxylate	Amino Acid	Glutamate Metabolism	42370	LC/MS Pos Early	35	1528	114.055	1196	2906-39-0	C04322	HMDB01301	1.19698	1.02195	0.1607	0.2355	0.7832	0.4749	0.6429	0.5164	1.3461	0.3746	0.5836	0.146	0.8959	1.3331	0.112082	0.164253	0.546253	0.331225	0.448399	0.36017	1.31719	0.366554	0.571065	0.142864	0.876657	1.30447		0.428581	0.130456	0.212239
454	2-hydroxybutyrate/2-hydroxyisobutyrate	Amino Acid	Glutathione Metabolism	52281	LC/MS Polar	100008928	1258	103.04					4.96883	1.05067	0.3765	1.1145	0.8284	1.048	0.6532	0.5346	0.591	0.6209	1.2146	0.3177	0.7431	0.6437	0.596137	1.76466	1.31166	1.65937	1.03425	0.846466	0.5625	0.590958	1.15603	0.302379	0.707265	0.612659		1.83442	0.00638495	0.102833
460	3'-dephospho-CoA-glutathione*	Amino Acid	Glutathione Metabolism	62807	LC/MS Neg	100020899	1690	495.101					0.81775	0.864767	1.1519	0.8058	1.3549	1.0812	1.6605	0.1944	1.2159	0.6547	1.1476	0.5123	1.1013	1.2499	0.895677	0.626562	1.05352	0.840703	1.29115	0.151159	1.40604	0.757083	1.32706	0.592414	1.27352	1.44536		0.714368	0.644443	0.476338
459	4-hydroxy-nonenal-glutathione	Amino Acid	Glutathione Metabolism	48487	LC/MS Neg	100006240	3319.2	462.192		99927-70-5			2.1317	0.750683	3.6692	2.4466	0.5709	1.6802	0.8833	2.0636	0.9827	1.0213	0.7713	1.1353	0.6044	0.8247	2.86027	1.90721	0.445036	1.30977	0.688563	1.60865	1.30907	1.36049	1.02746	1.51236	0.805133	1.0986		1.23989	0.24739	0.279505
451	5-oxoproline	Amino Acid	Glutathione Metabolism	1494	LC/MS Neg	1021	738.5	128.035	7405	98-79-3	C01879	HMDB00267	0.909567	1.02063	0.5588	0.7602	1.5155	1.201	1.0067	0.7041	0.9142	0.7108	0.9479	0.1311	0.9569	0.8136	0.46712	0.635477	1.26686	1.00396	0.841535	0.588581	0.895718	0.69643	0.928737	0.12845	0.937555	0.797152		1.09568	0.146443	0.22215
461	CoA-glutathione*	Amino Acid	Glutathione Metabolism	62804	LC/MS Neg	269	1326	535.084	11953788	6477-52-7	C00920		0.526233	0.918733	1.6999	0.8684	0.6866	1.0079	1.1042	0.2312	1.3639	0.7624	1.3757	0.5541	1.5074	1.0998	1.14086	0.582812	0.4608	0.676435	0.741066	0.155166	1.48454	0.829838	1.49739	0.603113	1.64074	1.19708		0.518033	0.214623	0.261882
445	cysteine-glutathione disulfide	Amino Acid	Glutathione Metabolism	35159	LC/MS Pos Early	100001437	2465	427.095	4247235	13081-14-6		HMDB00656	1.92563	1.65473	0.8362	0.1293	2.6017	0.479	0.973	1.2924	0.1917	1.12	0.2285	0.0761	0.8331	1.027	1.55432	0.240342	4.83602	0.890362	1.80861	2.4023	0.115849	0.676846	0.138089	0.0459893	0.503465	0.620644		5.5843	0.387739	0.351407
448	cysteinylglycine	Amino Acid	Glutathione Metabolism	35637	LC/MS Pos Early	278	2132	179.048	439498	19246-18-5	C01419	HMDB00078	1.03645	0.799067	0.3531	0.799	1.6345	1.3244	1.5447	0.0282	0.6735	1.1107	2.0508	0.0282	0.947	0.4617	0.421051	0.95276	1.94904	1.57927	1.84196	0.0336268	0.842858	1.39	2.56649	0.0352912	1.18513	0.577799		1.0273	0.681446	0.487928
[truncated: 1,590 more rows]

## Sheet: supplemental
PATHWAY SORTORDER	BIOCHEMICAL	SUPER PATHWAY	SUB PATHWAY	COMP ID	PLATFORM	CHEMICAL ID	RI	MASS	PUBCHEM	CAS	KEGG	Group HMDB	HFD Control	LFD Control	HFD ONC201	HFD ONC201	HFD ONC201	HFD ONC201	HFD ONC201	HFD ONC201	LFD ONC201	LFD ONC201	LFD ONC201	LFD ONC201	LFD ONC201	LFD ONC201	Scaled HFD	Scaled HFD	Scaled HFD	Scaled HFD	Scaled HFD	Scaled HFD	Scaled LFD	Scaled LFD	Scaled LFD	Scaled LFD	Scaled LFD	Scaled LFD		Obese + ONC/ obsese +veh lean +ONC/ Lean +veh Fold Change	Pvalue	Qvalue
[truncated: 1,619 more rows]
